# Supplementary material
Source: ML conference proceedings conference paper supplement (https://proceedings.mlr.press/v37/steinhardta15.html)
Supplement: Supplementary file 2 [file steinhardta15-supp.zip]

Archive with 37 entries (31 files):
- packaged-code/
- paper_with_appendix.pdf
- packaged-code/README.txt
- packaged-code/data/
- packaged-code/data/char-level/
- packaged-code/data/char-level/plain.dat
- packaged-code/data/char-level/cipher.dat
- packaged-code/data/char-level/key.dat
- packaged-code/data/char-level/to_txt.py
- packaged-code/data/char-level/plain.txt
- packaged-code/data/word-level/
- packaged-code/data/word-level/plain.dat
- packaged-code/data/word-level/cipher.dat
- packaged-code/data/word-level/key.dat
- packaged-code/data/word-level/to_txt.py
- packaged-code/data/word-level/plain.txt
- packaged-code/src/
- packaged-code/src/ExpandDerivation.java
- packaged-code/src/jar/
- packaged-code/src/jar/fig.jar
- packaged-code/src/jar/trove-3.1a1.jar
- packaged-code/src/jar/trove-3.1a1-src.jar
- packaged-code/src/jar/guava-14.0.1.jar
- packaged-code/src/Prefix.java
- packaged-code/src/Laplace.java
- packaged-code/src/Derivation.java
- packaged-code/src/MergeDerivation.java
- packaged-code/src/KNTrie.java
- packaged-code/src/run.py
- packaged-code/src/Reader.java
- packaged-code/src/Params.java
- packaged-code/src/Global.java
- packaged-code/src/Main.java
- packaged-code/src/Data.java
- packaged-code/src/Util.java
- packaged-code/src/Infer.java
- packaged-code/src/run_default.sh
