# Supplementary material
Source: ML conference proceedings conference paper supplement (https://proceedings.mlr.press/v37/steinhardta15.html)
Supplement: Supplementary file 2 [file steinhardta15-supp.zip › packaged-code/data/char-level/cipher.dat]

23 14 5
17 14 5
23 14 5
12 15 5 17
21 15 19 13 8 24 18
23 14 5
21 5 19 5
23 21 15
17 14 15 21
15 16
15 16
22 10 24 20
21 8 7 7
17 10 8 12
17 5 3 5 24
15 16
10 17
21 14 8 26 14
13 5 6 23
23 14 5
14 15 9 17 5
23 14 8 17
15 16
10
23 14 10 23
7 5 3 5 7 17
24 15 23
15 16 16 5 19 5 12
23 15
16 15 19
23 14 5
23 15 15 13
1 5
23 14 5 20
23 14 5
8 24
23 14 5
23 14 5
17 23 9 12 5 24 23
8 17
23 14 5
14 10 17
17 6 5 24 23
10
8 24
26 8 23 20
17 10 22 5
16 8 24 8 17 14 5 12
15 16
10
21 8 23 14
6 10 19 19 5 8 19 10
6 10 19 8 17 14
19 5 22 10 8 24 17
23 15
23 14 5
5 24 15 9 18 14
14 5
10 12 3 8 17 5 19 17
21 8 7 7
14 8 22
26 14 8 26 13 5 24
12 5 10 23 14
12 5 10 23 14
1 9 23
23 14 10 23
23 14 5
1 9 23
24 5 23 21 15 19 13
21 15 9 7 12
10 7 23 14 15 9 18 14
23 14 5
23 15 15 13
26 15 24 16 8 19 22 5 12
15 24 7 20
10 19 22 20
23 14 5 19 5
15 16
15 16
23 14 10 23
10 24
16 19 10 22 5
21 8 23 14
26 15 9 7 12
7 10 17 17 8 5
17 14 5
8 24
21 8 23 14
23 15
23 15
24 15 19 22 10 7
10
15 16
23 14 10 23
15 24 7 20
10
19 10 26 5
17 23 15 19 8 5 17
10
20 15 9
22 10 24
21 8 7 7
22 10 24 20
17 5 3 5 19 10 7
1 20
1 20
23 14 5
23 15
16 19 8 12 10 20
5 22 5 19 18 5 12
5 4 10 22 6 7 5
23 15
23 15
17 14 5
21 14 15
23 14 5
23 15
23 14 8 17
10 24 12
22 15 24 23 14 17
23 14 10 23
5 4 6 15 19 23
21 14 10 23
10 23
1 9 23
15 16
15 16
23 15
10 24 12
17 10 8 12
23 14 10 23
2 9 17 23
14 10 7 16
17 6 15 23
17 5 7 7
23 14 8 17
15 16
16 15 19
10 24 12
17 10 20 17
23 15
17 10 8 12
23 14 5
26 10 22 5
21 10 17
16 15 19
23 15
8 17
21 15 19 7 12
24 15 23
1 5
21 14 5 24
8 24 16 15 19 22 10 23 8 15 24
14 5 7 6
2 9 17 23
24 15 23
23 14 10 23
23 14 5 19 5
15 16
6 19 15 16 8 23 17
15 16
23 19 20 8 24 18
10 24 12
5 7 17 5
23 15
17 23 8 19 19 8 24 18
23 14 5
17 10 8 12
16 9 19 23 14 5 19
7 5 17 17 15 24 17
21 15 22 10 24
22 9 19 12 5 19
8 24
1 9 23
23 14 5
21 14 15
8 24
5 24 12
8 24
21 5 5 13
10
17 9 19 5
23 14 5
23 14 5
1 10 23 23 8 24 18
24 15 23
21 5 19 5
23 14 5
1 9 23
24 15 23
15 9 23
26 14 8 24 5 17 5
23 19 20 8 24 18
8 24
10 24 12
1 5 5 24
21 10 17 14 8 24 18 23 15 24
15 23 14 5 19 17
15 9 19 17 5 7 3 5 17
23 14 5
15 16
21 10 23 26 14 5 12
15 16
13 8 24 18
14 5
8 24
1 9 23
23 14 5 20
10 24 12
17 23 10 23 5
21 8 7 7
21 5 19 5
26 7 8 24 23 15 24
3 5 19 20
5 3 5 24 23
26 19 8 23 8 26 17
10
26 15 24 16 9 17 5 12
10 6 6 19 15 3 5 12
23 14 10 23
8 24
23 14 5
23 14 5
15 16
10 24 12
26 10 17 5
23 14 8 17
15 16
21 8 7 7
18 5 23
8 24 3 5 17 23 22 5 24 23
23 15
15 16
21 8 23 14
24 15 23
8 23
23 14 5
10 24 12
23 14 5
21 8 23 14
21 10 24 23
23 14 5 20
23 14 10 23
20 15 19 13
18 5 23
10 23
8 23
21 10 17
14 8 22
22 8 18 14 23
16 9 7 7
5 7 8 22 8 24 10 23 5
17 5 19 8 15 9 17
23 14 5
23 21 15
23 14 5
23 14 8 17
24 15 23
23 14 5
14 5 19 5
23 21 15
5 7 12 5 19 7 20
23 14 5 8 19
1 5 23 23 5 19
21 15 9 7 12
23 14 5
10 24 12
21 8 24 24 8 24 18
23 14 5
23 14 5
8 23
17 10 8 12
7 10 21 20 5 19
8 24
1 10 17 8 26
8 17
21 14 15
21 15 19 7 12
23 14 5
10 24 12
1 20
23 15
14 5
15 16
6 5 19 17 15 24
23 14 10 23
15 16
24 15 23
10 24 12
23 14 10 23
14 10 12
5 4 10 22 6 7 5
23 14 5
22 15 19 5
26 8 23 20
6 5 19 17 15 24
15 24 7 20
21 14 8 26 14
21 8 23 14
17 8 22 6 17 15 24
26 15 22 6 5 23 8 24 18
8 24
1 5 18 10 24
10
16 8 24 10 24 26 8 10 7
23 14 5
1 9 23
15 16
15 16
16 15 9 24 12 10 23 8 15 24
10 23
23 14 5
15 16
6 10 19 5 24 23 17
23 14 10 23
21 10 17
24 15 23
23 14 5
16 9 24 12
23 14 5
23 14 5
2 9 17 23
10 24 12
21 8 7 7
23 14 5
5 4 10 26 23 7 20
14 10 17
16 15 19
10 24 24 15 9 24 26 5 12
10 24 12
23 21 15
26 7 5 10 19
18 15 8 24 18
19 10 1 1 8
15 16
21 5 19 5
23 14 5
21 15 19 7 12
10
21 8 7 7
23 14 5
6 5 19 26 5 24 23
10 12 12 5 12
23 14 5
23 10 13 8 24 18
26 14 8 6 17
23 14 5
21 10 17
21 15 9 7 12
9 24 23 8 7
1 7 15 15 12
10 24 20 23 14 8 24 18
23 14 5
23 14 5
21 5 19 5
23 15
8 24
17 5 10 19 26 14
17 10 8 12
23 14 10 23
15 16
14 10 17
10 23
14 15 6 5 17
10
23 14 5
23 15
23 14 5
23 14 5
10 18 10 8 24 17 23
18 20 22 24 10 17 23 8 26 17
8 24
23 14 5
10 17
23 14 5
23 14 5
21 10 17
23 14 5
16 9 23 9 19 5
1 10 1 1 8 23 23
1 9 23
23 14 10 23
10 12 22 8 24 8 17 23 19 10 23 8 15 24
21 14 8 26 14
1 20
23 14 10 23
19 10 23 5
23 10 13 5
14 10 17
1 20
10 24 12
23 8 22 5
17 23 8 7 7
23 14 5
10 24 12
8 23
14 8 17
10
21 14 8 23 5
8 24
17 10 20
17 14 5
23 10 13 5
7 10 1 5 7
10 24 12
23 14 5
8 24
24 15 23
21 15 9 7 12
23 10 13 8 24 18
21 14 15
23 14 5
16 8 3 5
10
23 14 10 23
8 24
8 17
21 8 23 14
20 15 9 24 18 5 19
10 24 12
15 16
23 14 5
17 9 26 14
17 23 10 23 5
6 8 23 26 14 5 19
16 15 19
8 24
10
22 8 7 13
1 9 23 23 5 19
14 5
2 5 21 8 17 14
23 14 8 17
23 14 5
1 9 23
2 8 22 22 20
1 20
8 23
15 24 5
24 8 18 14 23
23 14 5
23 14 5
1 5
23 14 5
17 9 26 14
14 8 17
16 8 19 22
23 14 5
17 15 9 24 12
6 19 15 1 5
15 6 5 24 8 24 18
8 17
10 24 12
14 10 17
17 23 10 23 5 17
23 14 5
23 15
23 14 10 23
10 24 12
23 14 5
10 24 12
1 8 7 7
23 14 5
7 10 17 23
23 14 8 17
15 16
10 19 19 8 3 10 7
15 16
7 15 17 5
23 15
10 24 12
22 10 20
17 10 8 12
23 14 8 17
23 14 5
21 15 9 7 12
20 15 9 24 18
21 10 17
10 24 12
23 14 5
17 14 15 9 7 12
10
5 4 6 5 26 23 5 12
15 16
23 15
26 10 22 6 10 8 18 24
10 17
16 19 15 22
21 10 17
24 5 5 12
10
23 14 5
17 5 19 3 8 24 18
14 5
17 14 5
23 14 5
23 14 5
26 10 24
18 5 19 22 10 24 20
5 4 6 5 19 8 22 5 24 23 10 7
23 14 5
10 24
23 15
14 5
14 10 3 5
17 10 20 17
15 6 5 24 5 12
23 15
21 14 5 24
23 14 5
26 15 9 7 12
21 8 23 14
23 14 5
23 14 10 23
15 16
23 14 8 17
15 9 23
15 16
3 15 7 9 24 23 5 5 19
23 14 5
17 23 10 16 16
24 15 23
26 15 22 6 7 5 23 5
10
10 23
8 24 23 5 19 3 8 5 21
8 24 3 15 7 3 5 12
24 15 23
8 23
23 14 5
23 14 5
2 9 17 23
2 10 24 9 10 19 20
23 15
15 16
23 14 5 20
17 14 5
26 15 24 16 5 19 5 24 26 5
14 8 23 23 5 19
26 15 21 1 15 20 17
7 10 23 5 19
16 19 15 22
8 22 6 15 19 23 10 24 26 5
10 24 12
9 17 9 10 7
16 15 19
21 8 23 14
23 14 5
10 7 17 15
1 9 23
23 15
15 16
23 15 15 13
23 14 5
10 23
1 9 23
21 14 8 7 5
21 14 5 23 14 5 19
18 15 3 5 19 24 22 5 24 23
23 14 5 19 5
1 5
23 14 19 5 10 23 5 24 5 12
21 10 17
19 10 26 5
26 15 9 7 12
17 5 10 19 26 14
23 14 5
20 15 9
23 14 5
23 14 10 23
23 14 10 23
15 16
23 15
23 15
23 14 5
23 14 5
17 10 8 12
7 10 17 23
10 9 23 14 15 19 8 23 20
1 20
22 10 20
23 14 5
23 14 5 20
1 15 23 14
9 24 12 5 19
14 15 9 17 5
23 14 5
7 8 24 5 9 6
23 14 5 20
10 24 12
23 14 5 20
23 14 5
10 24 12
15 9 23
16 15 19
9 24 8 15 24
21 15 9 7 12
6 15 7 8 26 5
8 17
21 8 23 14
17 15 22 5 23 14 8 24 18
23 14 5
26 14 10 19 18 5 17
6 5 19 26 5 24 23
7 10 23 5 19
24 15 23
15 16
8 24
17 10 8 12
12 5 1 10 23 5
14 15 21
12 21 5 7 7
10 6 19 8 7
22 15 17 23
17 5 19 3 8 26 5 17
2 9 6 8 23 5 19
10 3 10 8 7 10 1 7 5
23 19 20 8 24 18
22 15 23 14 5 19 17
26 19 15 17 17
26 9 19 19 5 24 26 8 5 17
10 1 15 9 23
14 5
22 8 18 14 23
16 15 19
2 9 17 23
23 14 5
8 24
19 5 7 5 10 17 5
5 3 5 19 20 15 24 5
8 24 23 5 19 3 8 5 21
8 24
17 14 5
10
8 24 26 7 9 12 8 24 18
8 24
17 14 5
23 14 5
10
1 9 23
1 5 5 24
23 14 5
15 16
23 15
23 8 22 5
21 14 5 24
16 15 19
17 23 9 16 16
26 10 24
3 8 17 8 23 15 19 17
10 1 15 9 23
10
23 14 5
5 24 23 8 19 5
23 14 10 23
15 16
16 9 23 9 19 5
23 21 15
6 15 21 5 19
8 24
22 15 22
23 15 15 13
17 10 22 5
8 17
23 14 5
16 15 19
7 10 17 23
15 16
24 10 23 8 15 24
1 5 26 10 9 17 5
22 8 18 14 23
13 8 24 18
23 8 22 5
6 10 19 13 8 24 18
23 14 5
23 14 5
10
10 24 12
23 14 8 17
10 22 15 9 24 23 17
10 24 12
10
26 15 19 19 8 12 15 19
16 15 19
8 24
20 15 19 13
23 14 5
14 10 17
21 14 5 24
14 8 17
17 23 10 23 5 17
16 15 19
23 14 10 23
23 15
17 23 8 7 7
16 15 19
17 5 5 13 17
21 10 17
6 19 15 1 7 5 22 17
23 14 5
23 14 5
1 10 7 7
23 14 5
23 14 5
8 24
18 5 23
24 15 23
23 14 9 19 17 12 10 20
22 9 23 9 10 7
23 15
23 15
23 14 8 17
10 7 17 15
23 14 5
19 5 26 5 24 23
21 5 5 13
23 14 5
8 24
17 9 26 14
18 5 23
17 5 24 8 15 19
10 24
26 14 10 8 19 22 10 24
10 17
17 10 8 12
10 24 12
21 8 7 7
10
8 17
19 15 7 5
23 14 5
17 10 8 12
23 14 5
18 8 19 7
7 15 21 5 19
15 3 5 19
15 9 23
5 3 8 12 5 24 26 5
17 5 19 3 8 24 18
14 5 10 12 8 24 18
12 5 6 10 19 23 22 5 24 23
23 14 10 23
14 5
23 14 5
8 24
15 16 16
15 16
8 24
23 14 5 20
23 14 5
23 14 5
24 15 19 23 14
21 10 17
10 24 12
10 24 12
21 15 9 7 12
26 15 9 7 12
1 20
14 10 3 5
18 10 22 5
2 9 17 23
21 10 17
21 10 17
15 16
23 14 10 23
20 15 19 13
21 14 10 23
15 16
8 23
19 5 6 9 1 7 8 26 10 24 17
23 19 10 8 24 8 24 18
23 14 10 23
23 15
23 14 5
23 5 4 10 17
23 14 5
22 10 12 5
1 15 4
16 5 21
26 15 24 26 5 19 24 17
3 5 19 20
26 8 23 20
12 5 6 10 19 23 22 5 24 23
10 7 17 15
10 24 12
1 20
21 15 19 13 5 19 17
16 15 19
23 14 5
14 8 18 14
20 15 9
26 15 24 23 8 24 9 5 12
26 10 24
8 24
17 23 15 19 5
10 24 12
16 15 19
9 24 12 5 19
8 17
10 1 15 9 23
14 5
21 8 23 14
21 8 23 14
19 15 9 24 12
19 15 15 22
15 16
10 24 12
23 5 7 5 3 8 17 8 15 24
6 19 15
10 18 10 8 24 17 23
23 14 5
23 14 5
10 24 12
26 10 17 5
14 10 3 5
26 10 7 7 17
21 10 17
23 15
26 15 22 6 5 23 8 23 8 15 24
23 19 9 5
10
7 10 23 5 19
15 16
12 15 12 18 5 19 17
21 8 23 14
7 5 10 17 23
23 14 5 20
15 16
15 16
9 24 8 15 24 17
14 10 3 5
23 15
23 14 5
19 5 10 7 8 23 20
21 15 22 5 24
10 24 12
10 24 12
14 15 9 17 8 24 18
10 24 12
14 10 17
14 10 17
19 5 25 9 8 19 5 17
21 8 23 14
21 14 8 26 14
10 6 6 19 15 6 19 8 10 23 8 15 24 17
14 10 17
23 14 5
23 14 5 20
23 14 10 23
18 10 22 5
26 9 22 22 8 24 18 17
23 14 5
1 5 23 21 5 5 24
23 19 20 8 24 18
15 16 16 8 26 5
23 15
12 8 12
22 10 20
21 15 19 13 5 19 17
23 14 5
24 5 23 21 15 19 13
26 15 10 26 14
21 10 17
23 14 5
17 5 7 7 8 24 18
8 24
22 15 19 24 8 24 18
21 14 10 23
24 15 23
17 14 15 9 7 12
22 10 20
22 10 17 17 10 26 14 9 17 5 23 23 17
23 14 5
14 10 19 12
23 14 5
8 24
6 7 10 20
12 15 8 24 18
23 14 5 19 5
21 5 5 13
14 10 3 5
16 15 19
23 14 5
16 15 19
23 14 5
8 17
21 8 7 7
22 15 17 23 7 20
21 10 17
21 14 10 23
13 5 20
23 14 8 17
7 15 3 5
21 15 19 13
14 10 17
14 8 17
23 14 10 23
15 23 14 5 19
23 14 5 20
23 14 5
23 14 5
23 14 10 23
13 7 9 18 5
23 14 5
5 3 8 12 5 24 26 5
22 10 20
10 12 22 8 24 8 17 23 19 10 23 8 15 24
15 24 5
8 24
12 8 16 16 8 26 9 7 23
7 8 18 14 23
15 16
10 24 12
1 5 26 10 9 17 5
6 7 10 20 5 19 17
10
8 24
15 16
8 24
17 5 3 5 19 10 7
21 10 17
12 5 22 15 26 19 10 23 8 26
23 14 19 15 9 18 14
23 14 10 23
17 10 8 12
23 15
8 24
20 15 9
12 10 3 8 12
21 15 9 7 12
23 14 8 17
8 24
15 9 19
1 5
17 10 9 26 5
15 16
5 7 17 5
21 15 9 7 12
17 10 8 12
23 14 5
8 24
26 15 10 26 14
23 14 5
22 10 23 23 5 19
12 8 16 16 5 19 5 24 23
21 5 7 7
8 17
23 15
23 14 5
21 8 7 7
22 10 13 5
14 10 17
21 8 23 14
10
21 5 7 7
23 14 10 23
15 16
10 24 12
16 15 19
23 14 5
21 8 7 7
14 10 17
26 15 24 23 19 15 7 7 5 19 17
23 19 10 26 13
18 15 10 7
8 24
17 10 8 12
1 9 23
15 16
12 8 12
23 14 5 20
23 15
22 5 10 17 9 19 5 17
8 24
15 16
23 15
1 9 23
15 16 16 8 26 8 10 7 17
23 14 5
10 7 17 15
1 20
23 14 5
19 9 24
14 15 21
15 16
10
15 16
1 15 10 23
10 24 12
17 14 5
23 14 5
10
5 3 5 24
10 24 12
23 14 5
23 14 5
23 14 5
21 5 5 13
17 5 19 3 5 17
21 14 15
