# Supplementary material
Source: ML conference proceedings conference paper supplement (https://proceedings.mlr.press/v37/steinhardta15.html)
Supplement: Supplementary file 2 [file steinhardta15-supp.zip › packaged-code/data/char-level/key.dat]

1 10 a
2 1 b
3 26 c
4 12 d
5 5 e
6 16 f
7 18 g
8 14 h
9 8 i
10 2 j
11 13 k
12 7 l
13 22 m
14 24 n
15 15 o
16 6 p
17 25 q
18 19 r
19 17 s
20 23 t
21 9 u
22 3 v
23 21 w
24 4 x
25 20 y
26 11 z
