# Supplementary material
Source: ML conference proceedings conference paper supplement (https://proceedings.mlr.press/v37/steinhardta15.html)
Supplement: Supplementary file 2 [file steinhardta15-supp.zip › packaged-code/data/char-level/plain.dat]

1 20
20 8 5
20 8 1 20
23 1 19 8 9 14 7 20 15 14
23 9 20 8
20 15
20 8 1 20
13 1 14 25
2 21 20
8 15 21 19 5
8 9 19
1
23 1 19
5 22 5 14
9 19
1
15 6
25 15 21
9 20 19
1 19
20 8 5
20 15
20 8 5
18 5 16 21 2 12 9 3 1 14
16 15 23 5 18 19
19 20 9 12 12
16 15 9 14 20 19
6 15 18
20 8 5
20 15
16 15 19 19 9 2 12 5
3 1 21 19 5 19
1 14
18 9 3 8 1 18 4
23 8 9 20 5
1 19 11 9 14 7
20 9 13 5
20 8 5
15 6
23 1 19
19 1 9 4
20 15
12 9 20 20 12 5
8 15 12 5 19
1
23 5 18 5
9 14
15 6
16 1 9 4
20 15
8 1 22 5
9 19
1 14 4
8 1 12 6
19 20 15 18 5
21 11 18 1 9 14 5
20 8 5
9 19
1 14 4
20 8 5 25
20 8 5
19 1 13 5
20 8 1 20
20 8 5
19 8 5
8 9 13
19 20 15 18 25
20 15
12 1 19 20
13 1 4 5
16 12 1 3 5
20 8 5
2 21 20
20 8 5
4 18 21 7
25 15 21
1 12 18 5 1 4 25
8 9 19
13 1 20 20 5 18
23 9 20 8
13 15 18 5
20 8 5 25
8 15 21 19 5
20 15 4 1 25
4 15 3 21 13 5 14 20 19
20 8 5
20 8 5
23 1 14 20
16 5 18 3 5 14 20
15 6
19 8 5
8 9 19
2 25
20 8 5
19 1 9 4
1 14 4
8 9 19
6 21 5 12
13 9 3 8 1 5 12
20 8 5
6 15 18
15 6
3 9 20 25
18 5 19 20 1 21 18 1 14 20 19
6 15 18 13 5 18
2 9 7
3 8 1 14 7 5 4
18 5 13 5 13 2 5 18
8 1 19
9 14
16 12 1 25
13 5 20 19
1 16 16 5 1 12
20 18 1 4 5
20 8 5
1 18 13 25
15 6
1 19
19 9 12 5 14 20
23 5 18 5
16 18 5 3 9 19 5 12 25
20 8 5
20 8 1 20
15 23 14
6 15 18
15 6
15 6
20 8 5
23 15 21 12 4
19 1 25
1
20 8 5
7 5 18 13 1 14 25
20 8 5
6 15 18
15 6
8 5
1
1 14 4
9 14
6 15 18
20 8 5 25
1 19 11 5 4
20 8 5
1 14 4
19 1 25 9 14 7
10 21 19 20
13 1 11 5
20 8 1 20
8 15 21 19 5
20 8 5
20 8 5
23 15 18 12 4
14 15 18 20 8
8 1 19
9 14 22 1 19 9 15 14
23 8 5 14
20 15
1 14 4
19 20 9 12 12
15 22 5 18
1
8 9 7 8 12 25
1 14
3 8 1 9 18 13 1 14
23 8 15
20 8 5
15 6
12 5 20 20 5 18
15 6
1 19 19 5 19 19 13 5 14 20
3 9 20 25
16 15 23 5 18
20 15
16 5 18 19 15 14
19 1 9 4
20 15
20 8 1 20
19 1 25 19
20 8 5
1 14 4
20 8 5
4 5 3 9 19 9 15 14
13 5 1 19 21 18 5 19
19 1 9 4
2 15 25 19
18 1 3 5
20 18 1 3 11 9 14 7
6 1 13 9 12 25
1 14 4
9 20
4 5 20 1 9 12 19
14 1 20 21 18 1 12
20 8 5
19 20 1 20 5
8 1 22 5
14 15 20
1
20 8 5
16 18 9 19 15 14
8 15 18 19 5
13 1 14 25
19 9 7 14 9 6 9 3 1 14 20
13 15 14 20 8 19
23 8 15
23 5 5 11
8 9 19
2 5
20 8 5
16 12 1 25
19 1 9 4
15 6
20 8 5
20 15
20 8 5 25
15 6
3 15 14 20 18 15 12
1 14 4
18 21 14
23 8 5 14
8 15 23
9 14
20 23 15
16 12 1 25
15 6
12 5 1 22 5
8 5
19 9 13 16 19 15 14
9 14
9 14
20 8 5
14 15 20
15 23 14
8 1 19
23 1 19
13 1 4 5
8 1 19
9 14 6 15 18 13 1 20 9 15 14
1 20
9 14
20 8 21 19
12 1 19 20
9 14 4 9 22 9 4 21 1 12
12 1 20 5 18
15 6
1 14 4
20 8 5
20 15
1 19
20 8 5
8 1 22 5
1 14 4
20 8 5 25
20 8 5
6 9 12 13 13 1 11 5 18
20 8 5
4 5 13 15 3 18 1 20 9 3
1 4 21 12 20
19 20 1 20 5
16 5 18 6 15 18 13 1 14 3 5
5 14 4
9 20
20 8 5
1
1 14 4
9 19
1 14 4
21 14 9 20 5 4
15 6
8 5
20 8 5
1 14 4
9 14
8 9 19
19 15 13 5
20 8 1 20
11 9 14 7
20 8 5
14 1 20 9 15 14 1 12
20 8 5 9 18
20 15
1 14 4
1 14 4
2 5 8 1 22 5
18 1 20 5
6 15 18
20 8 5
19 21 9 20
12 9 14 5 21 16
15 14 12 25
14 5 20 23 15 18 11
16 12 1 3 5
10 21 4 7 5 19
20 15
2 21 20
6 1 18
23 9 14 4
6 9 14 1 14 3 9 1 12
1 19
23 8 15
23 9 20 8
16 5 18 8 1 16 19
20 8 5
20 8 5 9 18
20 8 5 18 5
9 20
20 8 5
2 21 20
20 8 5
20 8 5
15 6
23 9 14 7 19
2 21 20
5 14 15 18 13 15 21 19
1 14 4
9 19
20 8 5 25
20 8 5
15 6 6 9 3 9 1 12 19
13 1 14 21 6 1 3 20 21 18 5 18 19
2 5
20 8 1 20
20 8 5
15 6
15 6
15 6
9 14
13 15 19 20
20 15
13 5 1 14 19
1 20
9 14
9 14
16 18 15
8 15 21 19 5
6 18 1 14 11
7 1 20 5
20 15
15 6
5 6 6 5 3 20
2 21 20
20 8 5
20 8 5
20 15
19 15 13 5 20 8 9 14 7
23 8 9 3 8
8 5
8 15 23 5 22 5 18
20 8 5
14 15 20
20 8 1 20
1 6 6 5 3 20 5 4
20 8 5
20 8 5
19 5 18 22 9 3 5
20 8 5
20 8 5
15 6
14 5 1 18
15 6
7 15 22 5 18 14 13 5 14 20
15 6
1 14 4
20 15
1 14 4
23 8 1 20
23 8 9 3 8
8 1 4
20 15
20 15 15 11
8 5 12 16
23 8 15
23 5 19 20 3 8 5 19 20 5 18
1 14
20 5 1 18 19
2 1 19 5 2 1 12 12
3 15 21 12 4
1
20 15
12 1 20 5 18
19 8 5
15 21 18
15 6
20 8 5
2 5
14 1 20 9 15 14 1 12
5 21 18 15 16 5
16 15 23 5 18 6 21 12
23 1 19
20 8 5
20 8 5
19 20 1 20 5
20 21 5 19 4 1 25
20 8 9 19
16 18 15 2 12 5 13 19
15 20 8 5 18
23 9 20 8
1 23 1 25
23 15 18 12 4
11 9 14 7
8 9 19
10 21 19 20
7 18 1 14 4
5 24 16 5 3 20 5 4
6 18 15 13
20 8 5
20 15
20 8 9 14 7 19
8 1 22 9 14 7
20 8 5
23 9 12 12
9 20
18 15 1 4
1 7 1 9 14 19 20
3 15 13 16 21 20 5 18
6 21 14 4
1
20 8 5 9 18
6 21 14
25 15 18 11
20 8 5
20 8 5
9 20 19
1 14 4
2 21 20
8 9 7 8
20 8 21 19
8 5 18 5
8 9 19
8 1 19
1
9 14
4 9 22 5 18 19 5
20 8 5
16 18 15 2 1 2 12 25
20 15
9 14
6 15 18
19 20 18 9 11 5
1
6 1 19 20 5 18
1 14 4
1 20
20 8 5
23 9 20 8
19 9 14 3 5
20 8 5
20 8 5
9 14
20 15
23 9 12 19 15 14
5 1 18 14 9 14 7 19
20 8 5
20 8 5
6 1 9 18 12 25
20 5 12 12 9 14 7
2 25
9 19
20 8 9 19
3 15 21 12 4
18 9 7 8 20
3 15 13 16 5 20 9 20 9 15 14
19 15 12 22 5
1 12 12 15 23
20 8 5
12 5 1 4 5 18 19
15 6
2 15 1 20
20 15
23 9 20 8 9 14
20 8 5
9 14 1 4 22 5 18 20 5 14 20 12 25
20 8 5 25
20 15
15 6
16 5 18 3 5 14 20
23 8 15
1 14 4
23 8 9 20 5
6 15 18 3 5
9 19 12 1 14 4
4 15 5 19
15 6
23 1 19
1
23 1 19
19 8 5
10 21 19 20
2 15 15 11
8 1 19
20 8 5
10 15 8 14
23 8 1 20
8 9 19
1 19
23 15 18 12 4
13 1 14 1 7 5 18
7 1 13 5
3 15 13 13 9 19 19 9 15 14 5 18
8 9 19
2 15 20 8
4 9 4
20 25 11 5
15 6 6 5 18 9 14 7
5 7 7 19
13 15 18 5
15 6
9 14
3 15 21 12 4
6 15 18
20 9 13 5
20 8 5
20 15
2 1 18
6 9 14 1 14 3 9 1 12
13 9 4 4 12 5
8 1 22 5
15 6
1 2 15 21 20
1 14 4
19 21 13 13 9 20
10 15 2
20 8 5 9 18
23 1 19
20 15
22 15 9 3 5 19
20 8 5
7 1 13 5
2 25
9 14
6 18 1 13 5
23 18 15 20 5
9 20
20 8 5
20 18 5 5
9 19
2 5
14 15 20
13 15 19 20
9 14
1 14
20 8 5
14 1 20 9 15 14 1 12
9 20
9 14
20 8 5
20 15
23 15 21 12 4
20 8 5
1 14 4
8 1 19
20 8 5 18 5
20 8 5
15 6
15 6
12 1 19 20
9 14
3 15 21 12 4
20 8 5
2 21 20
1
20 8 5
15 6
1 18 15 21 14 4
25 15 21
1 19
1 14 4
20 8 5
8 9 19
20 8 5
20 8 5
18 5 12 1 20 9 15 14 19 8 9 16
23 1 19
19 21 18 22 9 22 5 4
9 14 4 9 22 9 4 21 1 12
15 6
20 8 5
19 1 9 4
9 19
20 8 5
19 8 5
23 8 15
12 15 20
20 8 1 20
7 1 13 5
20 8 5
23 8 9 3 8
9 20 19
20 8 5
12 15 19 5
18 5 17 21 9 18 5 13 5 14 20
20 8 5 25
1 14 4
13 15 18 5
3 1 12 12 5 4
4 9 6 6 9 3 21 12 20
1 14 4
22 9 19 9 20
16 15 12 9 3 5
20 15
15 6
2 21 19 9 14 5 19 19
6 15 18
9 19
1 20
20 8 5
16 18 15 16 15 19 1 12 19
23 1 19
16 18 15 7 18 1 13 19
10 21 19 20
2 21 20
1 18 5 1 19
20 8 1 20
20 8 5
6 15 18
20 15 12 4
20 8 5 25
20 8 5
9 14 22 5 19 20 13 5 14 20 19
2 5
5 21 18 15 16 5
1 2 15 21 20
20 8 5
4 9 19 3 21 19 19 9 15 14 19
1 14 4
1
20 15
15 6
15 6
10 21 19 20
13 1 11 5
20 8 5
15 14 5
20 8 5
9 14
16 8 9 12
20 8 5
23 8 15 19 5
23 1 19
1 19
23 9 14 4
13 9 12 5 19
23 1 20 5 18
6 15 18
23 8 5 14
20 15
2 21 9 12 4
23 15 18 11 5 4
20 8 5
23 9 14 14 9 14 7
20 15
15 21 20
5 6 6 5 3 20
9 14
15 6
20 15
5 12 19 5
20 8 5
20 8 5
1 14 4
8 1 19
3 15 14 7 18 5 19 19
1
9 14
20 15
1 20 20 5 14 20 9 15 14
9 14 20 5 18 22 9 5 23
20 8 18 15 21 7 8
2 21 20
20 15
6 9 14 1 14 3 9 1 12
9 20
4 1 13 1 7 5
20 8 5 25
2 5 7 1 14
8 9 19
6 18 5 19 8 13 1 14
3 8 1 18 7 5 19
11 14 15 23 14
12 5 1 7 21 5
2 25
16 15 12 9 3 25
23 15 18 12 4
3 12 5 1 18
15 6 6 9 3 9 1 12 19
20 8 5 9 18
23 1 20 5 18
16 5 14 1 12 20 25
20 5 3 8 14 9 17 21 5
20 8 9 19
20 5 12 5 22 9 19 9 15 14
6 18 15 13
20 8 5
16 15 23 5 18 6 21 12
23 15 21 12 4
18 1 9 19 5 4
1 20
2 1 18 7 1 9 14
2 1 5 18 7 1
23 9 12 12
12 15 19 5
20 8 18 15 21 7 8
20 8 5
20 8 5 25
20 8 5
22 15 12 21 13 5
20 8 5
20 8 5
23 1 19
16 18 15 7 18 1 13 19
1 14 4
23 8 1 20
23 8 9 3 8
20 15 15
20 8 5
15 6
23 8 15
1 12 19 15
5 17 21 1 20 9 15 14
3 15 18 18 5 3 20
20 8 5 9 18
20 8 5
19 20 15 18 25
9 20
20 8 5
5 22 5 14
1 14 4
1 14 4
15 21 20
2 5 7 1 14
23 5 18 5
12 5 1 4 5 18 19
20 15
1 14 4
1 19 9 4 5
1 20
23 8 15
8 1 19
5 22 5 18 25
13 1 11 5
20 8 5
15 6
20 8 5
20 8 1 20
15 6
1 14 4
2 15 20 8
18 21 19 19 9 1 14 19
15 6
3 1 14
15 6
20 8 1 20
20 8 5 18 5
1 18 5 1 19
19 1 9 4
9 19 19 21 5
15 6
1 14 4
4 15 3 21 13 5 14 20
7 18 15 21 16
25 15 18 11
4 5 6 5 14 4 5 4
9 20 19
8 5 18 5
2 21 20
20 8 5 18 5
19 20 21 4 9 5 19
18 5 1 12
9 14
8 9 19
20 8 5 18 5
3 1 13 16 1 9 7 14
9 14
19 15 13 5
20 8 5
1
23 1 19
15 6
8 15 23
6 15 18
15 6
20 8 5
19 1 12 1 18 25
8 1 22 5
6 18 15 13
23 8 5 14
20 8 5
1 14 4
19 1 9 4
23 1 19
20 8 5
19 8 15 21 12 4
6 5 23
16 18 15 2 12 5 13 19
18 9 7 8 20
1
8 1 19
20 8 5
20 8 5
9 19
20 8 5
4 9 19 11
20 15
23 8 1 20
14 5 23
9 14
19 20 1 20 5
1
6 21 20 21 18 5
12 15 22 5
15 6
18 5 19 9 4 5 14 20 19
13 15 18 5
23 9 20 8
8 1 22 5
15 6
20 18 9 1 12
15 6
9 20
1
20 8 5
13 9 24 5 4
1 20
12 1 19 20
15 20 8 5 18
20 8 5
19 1 14
9 20
20 15
19 5 22 5 14 20 8
23 8 15
20 15
3 9 20 25
10 21 19 20
1
15 6
15 16 5 18 1 20 9 15 14 19
1 19
20 15
1 2 15 21 20
12 9 20 20 12 5
1
23 9 12 12
1
20 8 1 20
19 8 15 23
14 15 20
20 8 5 25
23 8 15
13 15 18 20 7 1 7 5
13 9 7 8 20
1 23 1 25
20 8 5
14 15 20
20 8 5
1 14 4
1 14 4
8 1 22 5
15 6
15 6
20 8 5
2 21 20
14 15 18 20 8
20 8 5
19 5 1 19 15 14
1 14 4
19 15 13 5
1
8 9 19
9 20 19
1 14 4
1
9 20
20 8 5
3 15 21 12 4
6 15 18
9 14
12 5 3 8
25 15 21
20 8 18 15 21 7 8
20 8 5
20 9 13 5
2 1 4
1 14 4
20 8 5
2 18 15 23 14
15 6
15 14 5
1
19 1 20 21 18 4 1 25
18 9 19 9 14 7
9 14
1 14 4
13 1 14
23 9 20 8
3 15 21 14 20 25
12 9 5 21 20 5 14 1 14 20
6 15 24
20 8 5
18 21 14
20 8 5
20 8 15 21 7 8 20
20 8 1 20
20 8 5
15 6
23 9 12 12
20 8 5
7 15 1 12
9 14 20 5 18 5 19 20 19
20 15
20 8 5
14 15 20
1 3 3 15 21 14 20
20 15
8 9 19
13 15 18 14 9 14 7
19 20 1 20 5
1 20
20 8 5
8 1 19
19 20 1 20 5
16 18 5 19 5 14 20
13 1 18 20 9 14
20 15
9 14 20 5 18 14 1 20 9 15 14 1 12
23 5 5 11
20 8 5 18 5
23 15 13 5 14
1 19
2 18 5 1 11 6 1 19 20
6 15 18
20 8 1 20
23 9 20 8
18 5 17 21 9 18 5 13 5 14 20
20 8 5
15 6
20 8 1 20
19 8 5
20 8 5
20 1 18 7 5 20
15 6
20 8 5
2 5 5 14
23 8 15
20 8 5
1 4 13 9 14 9 19 20 18 1 20 9 15 14
6 15 18
23 9 12 12
19 1 9 4
20 15
2 21 20
9 14
23 1 19
19 5 1 18 3 8
20 15
1 14 4
7 5 20
8 1 4
15 20 8 5 18
20 15 15
23 8 15
20 15
6 1 3 9 12 9 20 9 5 19
15 1 11 19
1 6 20 5 18
20 8 5
3 15 21 12 4
9 14
9 14 20 5 18 5 19 20 19
2 18 9 4 7 5
20 15
8 5
23 9 20 8
23 9 20 8
18 5 16 21 2 12 9 3 1 14
16 18 15 22 5
15 6
20 8 5
15 21 20
20 8 15 21 7 8
20 8 9 19
16 18 9 3 5 19
5 19 16 5 3 9 1 12 12 25
23 8 5 14
19 1 9 4
20 15
23 9 20 8
23 9 20 8
20 8 5
19 15 13 5
20 8 5
15 21 20
4 18 25
16 5 18 3 5 14 20
20 8 5 25
1 14 4
15 6
1 14 4
18 5 3 5 9 22 5 4
23 8 5 14
1 20
20 8 5 19 5
23 9 12 12
1 14 4
2 21 9 12 4 9 14 7 19
13 1 14 25
20 15
20 8 5
1
8 1 22 5
19 1 25
20 8 5
15 6
16 18 15 19 5 3 21 20 15 18 19
7 5 20
20 8 5
20 8 5
1 12 19 15
20 8 5
1 14 4
4 9 4
1
19 3 15 20 20
15 6
9 19
8 1 4
4 15 9 14 7
23 8 15
15 6
8 1 22 5
9 14
15 6
20 8 5
20 8 5
9 14
15 14 12 25
19 1 9 4
20 8 5
6 18 15 13
9 19 12 1 14 4
1 14 4
25 15 21
9 20 19
9 20
14 15 18 13 1 12
23 9 20 8
20 8 5
3 12 9 14 20 15 14
23 5 12 12
9 14
3 1 18 5
6 15 18
6 15 18
5 25 5 19
3 1 18 5
19 5 1 19 15 14
18 15 23 12 1 14 4
4 5 16 1 18 20 13 5 14 20
20 8 5
9 19
15 6
2 18 9 14 7
4 5 1 20 8
15 6
2 5 20 20 5 18
20 8 5
23 9 20 8
20 8 5
9 19
1 14 4
2 5 3 1 21 19 5
4 5 6 9 14 9 20 5 12 25
15 6
1 14 4
2 5 3 1 21 19 5
20 18 9 5 4
9 14
13 1 25
20 8 5
20 8 5
9 14
3 1 14
20 8 18 15 21 7 8
9 14
25 15 18 11
20 8 5 25
17 21 5 19 20 9 15 14 19
13 1 20 5 18 9 1 12
14 15 20
20 8 5
19 1 9 4
15 6
20 8 5
20 15
23 9 20 8
6 15 18
15 14 5
8 1 19
20 8 5
20 8 5
20 8 5
19 1 9 4
8 15 21 19 5
7 18 15 21 16
7 15 22 5 18 14 13 5 14 20
20 8 5
19 20 5 16 8 5 14
2 5
20 8 5
2 21 20
1 2 15 21 20
20 8 5
15 6
19 5 22 5 18 1 12
20 8 1 20
20 23 15
3 15 14 22 5 14 20 9 15 14
23 1 19 8 9 14 7 20 15 14
8 9 19
20 15
20 8 5
20 8 1 20
20 8 5
8 1 22 5
12 15 15 11 19
1 14 4
1 14 4
19 1 25 19
20 15
2 15 20 8
23 15 21 12 4
12 1 20 5 18
20 8 5
1 19
15 6
6 1 18
3 12 9 13 2 9 14 7
10 15 8 14
8 9 19
7 18 1 4 5
1 14 4
4 1 14 7 5 18 15 21 19
13 9 12 12 9 15 14
1 14 4
1 14
15 6
1
15 6
9 14
1 14 4
23 9 12 12
20 1 11 5
13 1 25
5 12 4 5 18 12 25
1 20
8 1 22 5
5 22 5 14
20 8 5
2 5 12 9 5 22 5 4
15 6 6 9 3 9 1 12 19
9 14
9 14
2 9 12 12
18 5 19 21 12 20 19
6 21 12 12 25
2 25
20 8 5
18 9 3 8 1 18 4 19
1 14 4
25 15 21
20 8 5
5 22 9 4 5 14 3 5
19 20 1 18 20
13 15 18 5
20 15
19 3 15 16 5
1 14 4
23 1 19
20 8 5
16 9 3 20 21 18 5 19
5 24 5 3 21 20 9 22 5 19
2 1 12 1 14 3 5
5 1 19 20
20 8 9 19
8 5 18 5
23 8 1 20
1
20 8 5
9 20
9 14
4 5 3 9 19 9 15 14
23 8 9 3 8
3 15 14 3 5 18 14 19
15 6
12 1 14 7 21 1 7 5
15 6
23 9 12 12
1 14
13 9 12 12 9 15 14
16 18 15 6 5 19 19 15 18
1 19 11 5 4
4 9 1 18 25
19 1 20 21 18 4 1 25
2 5 3 1 21 19 5
1 2 15 21 20
20 8 5 9 18
20 8 5
23 1 14 20
6 15 18
1
15 6
5 14 4
5 14 4
3 18 9 13 9 14 1 12
19 1 9 4
20 8 5
8 1 19
19 20 1 18 20
23 1 19
12 1 19 20
6 15 18
19 20 1 20 5
23 8 1 20
1 14 4
1 14 25 20 8 9 14 7
20 8 5
19 5 1 19 15 14
9 14
12 1 14 4 12 15 18 4 19
18 5 3 5 14 20
20 8 5
1 14 4
2 9 12 12
23 1 9 20
23 1 14 20
20 8 5
14 15 20
1 14 4
1
19 1 13 5
5 25 5
8 1 19
20 8 5
20 8 1 20
3 1 13 16
9 20 19
19 1 9 4
13 1 25
8 9 19
5 3 15 14 15 13 9 3
9 14 4 9 1 14
20 8 5
5 24 1 13 16 12 5
15 20 8 5 18
15 6
15 6
20 8 5
3 8 1 18 7 5 4
6 18 15 13
2 25
23 1 20 5 18
20 15
9 14
16 21 18 3 8 1 19 5 4
12 15 3 1 20 9 15 14
3 9 20 25
16 5 18 3 5 14 20
20 8 1 20
20 8 1 20
9 20 19
20 8 5
20 8 5
8 15 12 4 19
1 14 4
20 8 5
23 1 20 5 18
20 8 18 5 1 20 19
9 14 6 15 18 13 1 20 9 15 14
15 6
20 8 5
1 14
5 6 6 15 18 20 19
9 20 19
14 5 1 18 12 25
18 5 13 5 13 2 5 18
20 8 5
2 21 20
20 8 5
15 6
20 8 5
13 1 14 25
23 1 19
19 1 20 21 18 4 1 25
20 15
1 14 4
2 1 14
20 8 5
8 9 19
19 20 1 20 9 15 14
1 14 4
6 15 18
19 1 9 4
21 14 9 20 5 4
23 9 20 8
9 14
1 14 4
6 1 20 8 5 18
1 16 1 18 20
6 15 18
6 15 18
9 20
20 8 5 25
16 18 15 10 5 3 20
2 21 20
3 15 13 13 21 14 9 20 25
3 5 18 20 1 9 14 12 25
20 8 5
20 8 5
23 5 12 12
1 14 4
9 20
2 1 19 11 5 20 2 1 12 12
20 8 5
13 5 18 5
20 8 1 20
20 15
23 9 20 8
20 8 5 25
20 8 5
23 15 18 12 4
8 1 19
20 8 5
23 9 20 8
9 14
19 1 9 4
1
19 1 25
9 14
20 8 9 14 7 19
25 15 21 14 7 5 18
15 6
23 8 9 3 8
3 1 14 4 9 4 1 20 5 19
13 1 4 5
9 14
20 23 15
20 8 5 9 18
8 9 13 19 5 12 6
23 9 12 12
19 1 9 4
23 15 21 12 4
20 8 5
20 8 5 9 18
15 6
3 15 14 19 9 4 5 18 1 20 9 15 14
20 8 5
20 8 5
20 8 5
1 4 4 9 14 7
6 15 18
9 20 19
2 5 20 23 5 5 14
3 15 13 13 9 19 19 9 15 14
19 9 14 7 19
20 8 5
20 8 1 20
23 8 15
1 14 4
9 20 19
20 23 15
20 8 5
8 5
12 9 20 20 12 5
7 5 20
20 8 5
3 8 18 9 19
23 15 21 12 4
12 5 1 19 20
19 20 15 18 5
20 8 5
8 1 19
20 8 5
15 20 8 5 18
1 14 4
2 25
20 8 5
20 8 5
19 8 5
20 8 1 20
15 23 14
20 8 5 25
2 9 7
1 14 4
1 14 4
1 14 4
8 1 22 5
23 18 15 14 7
19 9 13 9 12 1 18
16 18 15 19 16 5 3 20
20 8 5
2 15 20 8
23 8 9 3 8
15 6
1 23 1 25
1 7 5 14 3 25
20 8 5
6 1 20 8 5 18
19 8 15 23
2 1 11 5 18
9 14
15 6
12 5 23 9 19
1 14 4
23 8 15 19 5
15 6
6 1 20 8 5 18
15 6 6 9 3 9 1 12 19
19 1 9 4
9 14
2 5
20 15
20 8 5
1 14 4
16 18 15 2 1 2 12 25
6 15 18 13 1 12
4 5 1 12
1 2 15 21 20
2 21 20
15 6
20 8 5
20 8 5 25
5 1 19 20
15 6
18 5 6 5 18 18 1 12 19
15 14 12 25
15 6
3 15 14 20 18 15 12
1 19 9 1
1 14 4
20 8 5
1 14 4
13 15 18 5
8 1 22 5
19 20 9 12 12
9 14
20 8 5 25
1 20
12 1 19 20
3 18 9 20 9 3 1 12
20 8 5
19 21 3 3 5 19 19
14 1 20 9 15 14 1 12
23 1 19
23 1 19
5 21 18 15 16 5
20 8 5
20 15
12 5 4
23 5 18 5
2 15 18 14
20 15
13 15 19 20
7 15 22 5 18 14 13 5 14 20
20 8 5
3 15 13 16 12 5 20 5
20 8 5
20 23 15
15 6
1 20
20 15
5 22 5 18 25 15 14 5
5 1 3 8
4 5 13 15 3 18 1 20
4 1 22 9 4
2 21 20
10 15 2
12 1 19 20
20 15
13 1 4 5
20 8 5
1 20
20 8 5
2 21 20
12 5 1 4 19
20 8 5
1 2 15 21 20
9 14
23 9 20 8
20 8 5
20 8 5
1 14 4
19 20 1 20 5
20 8 9 19
23 15 21 12 4
14 5 24 20
20 21 5 19 4 1 25
23 9 20 8
20 15
23 8 1 20
8 1 19
19 21 3 8
20 8 5
19 21 3 8
3 15 14 20 18 15 12
15 6
15 6 6
2 21 20
20 8 5
16 9 26 26 1
23 5 18 5
25 15 21
1 14 4
20 15
15 6
23 8 1 20
20 8 5
19 15 13 5 15 14 5
19 20 1 20 5
9 20 19
1 14 4
13 15 14 20 18 5 1 12
1 20
18 5 1 3 8 5 4
20 9 13 5
20 8 5
7 15 22 5 18 14 13 5 14 20
20 8 5
19 3 9 5 14 3 5
20 8 5
1 14 4
20 8 5
1 2 15 21 20
20 8 1 20
20 8 5
15 6
13 15 18 5
9 14
23 9 20 8
12 5 1 7 21 5
16 15 12 9 3 5
6 15 18
9 19 19 21 5 19
1 20
1 14 4
19 8 15 21 12 4
13 9 7 8 20
1 6 20 5 18 14 15 15 14
23 18 15 20 5
7 5 18 13 1 14 25
20 8 5
6 15 18
23 5 18 5
2 9 18 20 8
2 5
8 1 22 5
20 8 1 20
1 14 4
23 9 12 12
6 15 18
8 1 4
20 8 18 15 21 7 8
20 8 5
8 9 19
1
16 15 21 14 4 19
19 1 9 4
20 8 5
6 15 18 13 5 18
2 25
20 8 5
19 8 5
1
16 1 19 19 5 4
23 1 19
20 8 5
9 14
8 15 23
25 15 21
20 8 1 20
7 5 20
12 15 22 5
1 2 15 21 20
16 18 15 2 1 2 12 25
20 15
15 6
23 8 9 3 8
13 1 14 25
19 20 1 18 20 19
15 6
15 6
23 8 15
16 18 15 7 18 1 13 19
20 8 5
20 8 9 14 7 19
20 18 1 9 14 19
19 5 1 19 15 14
16 5 18 6 15 18 13 1 14 3 5
15 6
1
20 15
20 8 5
3 8 9 3 1 7 15
12 5 4
23 9 20 8
9 14
19 8 15 23
20 15
20 8 5
1 14 4
1
20 15
19 15 13 5
1
6 15 12 12 15 23 9 14 7
13 9 12 12 9 15 14
1 14 4
16 18 9 14 3 9 16 12 5 19
13 15 18 5
19 15 21 18 3 5
20 8 5 9 18
19 5 14 19 5
19 1 13 5
1 16 16 5 1 18 1 14 3 5
9 14 22 15 12 22 5 4
20 8 5
2 21 20
19 5 5 13 5 4
20 8 5
20 8 5
22 9 19 9 20
9 20 19
12 5 1 4 5 18 19
3 15 21 16 12 5
8 1 14 4
8 5 2 18 5 23
8 5
16 1 3 11
1
20 8 5
20 8 1 20
20 8 18 15 21 7 8
19 1 9 4
23 9 20 8
1 12 18 5 1 4 25
20 8 5
19 1 9 4
20 8 5
20 8 1 20
9 19
18 21 14
20 8 5 19 5
5 22 5 14
20 8 5
20 9 13 5
1
1 7 5 14 3 9 5 19
16 12 1 25 5 18 19
15 6
20 23 15
20 8 5
1 21 4 9 5 14 3 5
13 5 1 14 23 8 9 12 5
1
20 8 5
9 20
8 1 9 20 9
23 8 15
1 19
20 8 5 18 5
15 6
20 8 1 20
1 14 4
4 5 1 12
20 8 5
16 18 15 4 21 3 20
20 15
6 9 5 12 4
19 8 15 23
23 9 12 12 9 1 13 19
20 15
20 8 5
20 8 5
20 8 5
20 8 1 20
20 8 1 20
9 20
1 13 5 18 9 3 1 14 19
1 14 4
20 8 5
20 8 9 19
19 16 5 3 9 1 12
2 5 12 9 5 22 5
6 9 22 5
23 15 18 12 4
20 8 5
23 9 12 12
8 1 19
20 8 1 20
20 1 24 5 19
14 15 20
18 5 6 21 7 5 5 19
20 8 5
20 15
19 9 20 20 9 14 7
4 5 16 1 18 20 13 5 14 20
19 1 25 19
9 14
13 9 20 3 8 5 12 12
20 8 1 20
20 8 5
8 21 19 2 1 14 4
1 7 5 14 20
14 5 23 19
14 5 23 19
10 21 19 20
2 18 15 11 5
20 8 5
20 8 1 20
15 6
3 12 9 14 20 15 14
13 9 12 12 9 15 14
20 8 5 18 5
15 21 20
9 19
1 14 4
6 21 14 4
6 15 18 3 5
19 5 14 20
1 14 4
8 15 13 5 19
12 1 19 20
9 14 6 15 18 13 1 20 9 15 14
9 14
23 15 18 20 8
6 9 14 1 12 12 25
2 21 20
23 1 19
20 8 5
15 6
21 14 4 5 18
15 6
3 12 1 9 13 9 14 7
15 6
16 1 9 18
20 8 5 25
15 14 5
20 8 5
6 15 18
1
1
23 9 20 8
19 8 15 23
16 18 5 19 5 14 3 5
15 6 20 5 14
15 6
20 8 5
20 8 5
19 21 5 4
19 5 14 9 15 18
9 20 1 12 9 1 14
8 15 21 19 5
15 6
20 8 5
1 14 4
23 15 21 12 4
5 22 5 18 25
23 15 21 12 4
1 6 20 5 18
2 15 15 11
14 5 23
16 5 18 6 15 18 13 1 14 3 5
23 1 19
20 8 5
20 8 5
20 8 9 19
1 14 4
20 8 5 18 5
19 1 9 4
12 15 23 5 18
1 14 4
19 1 9 4
21 14 4 5 18
20 8 5
12 1 23 25 5 18
20 15
15 6
12 1 19 20
5 22 5 18 25
2 25
8 1 22 5
21 14 9 15 14
9 14
20 8 5
4 18 9 22 5
20 8 5
9 14 22 5 14 20 5 4
15 6
14 15 20
12 1 19 20
1 6 20 5 18
15 6 6 9 3 5 18
20 15
3 15 13 13 9 19 19 9 15 14
5 22 5 18 25 15 14 5
16 1 18 20
1 13 15 14 7
14 5 1 18 12 25
15 6
13 15 18 5
16 18 15 20 5 3 20
2 5 20 20 5 18
20 8 5
15 6 6 9 3 9 1 12 19
23 5 12 12
12 1 19 20
20 8 5
6 15 18
8 1 22 5
16 5 14 1 12 20 25
2 25
20 15
15 23 14
1 12 23 1 25 19
20 8 1 20
20 18 1 4 5
1 14 4
20 8 5
9 14
19 1 9 4
15 6
4 9 4
20 8 18 15 21 7 8
23 8 5 14
19 8 1 18 5
1 8 5 1 4
19 20 1 20 5
1
12 15 15 19 5
20 8 1 20
2 25
23 9 20 8
20 15
20 8 5 9 18
8 1 14 4
4 1 22 9 4
8 15 13 5 19
8 1 19
20 8 5
5 3 15 14 15 13 9 3
20 8 5
20 8 5
20 8 9 19
2 21 20
15 14 5
19 3 8 15 15 12
23 8 9 3 8
1
3 1 19 5
3 8 1 14 3 5
3 15 14 19 21 12 20 9 14 7
20 15
8 9 19
9 14
3 1 19 5
20 8 5
20 15
1 20
20 8 5
15 6
1 20
20 8 5
8 1 22 5
19 21 3 3 5 19 19
19 20 1 20 5 19
20 8 5
19 5 22 5 14
19 1 9 4
3 15 14 7 18 5 19 19 9 15 14 1 12
20 8 5
19 5 16 20 5 13 2 5 18
1 14 4
1 22 1 9 12 1 2 12 5
4 9 6 6 9 3 21 12 20
20 8 5
20 8 5 9 18
1 2 15 21 20
6 9 12 13 19
5 21 18 15 16 5
1 19
20 8 5
6 15 18
14 15 20
1 14 4
8 15 23
7 15 22 5 18 14 13 5 14 20
15 6
14 15 20
8 5
15 6
1 14 4
20 8 5 18 1 16 25
9 14
20 15
12 9 20 20 12 5
8 5 18
13 15 19 20
9 14
19 1 25
1
23 9 20 8
6 15 18
2 21 20
16 12 1 25
3 18 15 19 19
3 1 12 12 5 4
8 15 16 5 19
20 8 5
6 15 18
9 20
2 5 7 1 14
6 15 18
20 15
20 8 5
1 2 15 21 20
1
15 22 5 18
23 1 19
1 14 4
9 14 10 21 18 25
20 8 1 20
13 15 19 20
2 5 20 20 5 18
8 9 19
9 14
20 15
19 9 14 7 5 18 19
3 25 2 5 18 19 16 1 3 5
12 1 14 7 21 1 7 5
1 14 4
2 5
4 1 21 14 20 9 14 7
15 6
15 6
25 15 21
23 15 18 12 4
3 1 13 16
9 14
20 8 18 15 21 7 8
9 20
20 8 9 19
1 14 4
6 18 15 13
19 1 9 4
20 8 5
6 21 12 12
20 15
20 8 5 18 5
20 8 5
4 5 3 9 19 9 15 14
3 1 14
6 5 23
20 8 5
20 8 5
23 9 20 8
2 18 9 20 9 19 8
1 14 4
2 21 20
8 9 19
1 14 4
20 8 5
20 8 5
19 8 15 23
23 5 12 3 15 13 5
13 1 14 1 7 5 18
2 5
16 15 12 9 3 5
20 8 5
20 8 5
20 8 5
9 20
20 8 5
4 5 16 1 18 20 13 5 14 20
19 5 22 5 18 1 12
15 6
20 8 5
9 14
14 1 20 9 15 14
18 9 7 8 20
6 9 5 12 4
20 8 5
8 1 22 5
15 6
9 14
20 8 5
19 5 18 22 9 3 5
19 15 13 5
9 14
9 14
1 8 5 1 4
20 8 5
1 14 4
1
9 14
23 8 15
20 8 5
15 6
16 18 15 4 21 3 20
23 8 5 14
16 5 18 3 5 14 20
19 12 15 23
1 14 4
20 8 5
8 1 22 5
5 24 16 15 18 20 19
15 6
20 15
20 8 5
13 1 14 25
19 3 8 15 15 12
23 1 19
10 21 19 20
18 15 15 13 19
20 8 5
15 21 20
2 21 20
9 4 5 1 19
5 14 4 9 14 7
23 8 1 20
14 5 24 20
3 8 1 9 18 13 1 14
1 20
1
23 9 20 8
1
19 20 15 3 11 8 15 12 13
20 8 5
4 9 6 6 9 3 21 12 20
3 15 14 20 18 15 12
25 15 21 14 7 5 18
20 8 1 20
8 5 14 18 25
15 6
9 20 19
23 15 18 11 19
20 8 5 25
2 5 3 1 21 19 5
12 5 20
9 14
23 8 15
20 8 1 20
1 18 15 21 14 4
20 8 5
20 8 5
15 6
19 20 15 18 25
8 5
23 8 1 20
23 9 12 12
9 14
20 8 5
15 21 20
8 5
20 8 5
13 9 19 20 1 11 5
7 15 9 14 7
8 5 1 4
6 15 18
9 19
13 1 11 5
20 8 5
1 20 12 1 14 20 1
16 19 25 3 8 9 1 20 18 9 19 20 19
20 8 15 21 7 8 20
15 6
1 2 15 21 20
2 21 20
8 9 19
6 21 14 4 19
1 14 4
6 1 2 18 9 3
20 8 5
16 5 18 3 5 14 20
15 6
23 5 5 11
2 18 15 20 8 5 18 19
8 1 22 5
20 15 15 11
15 6
9 14
20 5 24 1 19
19 3 15 18 9 14 7
1 18 7 5 14 20 9 14 1
5 24 1 13 16 12 5
20 8 5 25
2 21 20
20 8 9 19
8 9 13
8 9 19
15 6
3 15 14 20 18 15 12
1 23 1 25
8 1 19
20 8 5
15 6
14 15 18 20 8
20 8 5
19 5 5 13 19
20 8 9 19
1
3 12 1 9 13
15 6
20 15
10 5 20 19
8 15 23 5 22 5 18
23 8 15
6 15 18
20 8 5 19 5
18 9 7 8 20
3 1 12 12 5 4
20 8 5
19 20 1 20 5
15 6
13 15 18 5
20 8 5
4 5 20 1 9 12 5 4
17 21 5 19 20 9 15 14 19
8 1 22 5
1 14 4
6 15 18
20 8 5
8 1 9 20 9
6 9 19 8 5 18 13 1 14
2 21 20 20 5 18
3 8 1 14 7 5
19 1 9 4
2 5 3 15 13 5 19
20 8 5
15 6
1 19
15 6
20 8 5
20 8 9 19
22 1 18 9 5 20 9 5 19
19 20 1 4 9 21 13
2 15 15 11
20 8 5 25
16 18 15 6 5 19 19 15 18
20 8 5
15 14 12 25
1 12 15 14 7
19 15 13 5 20 9 13 5
18 21 14
3 12 9 14 20 15 14
9 14
6 18 9 4 1 25
23 5 18 5
3 12 9 14 20 15 14
3 12 9 14 20 15 14
5 14 4
1 20
19 20 1 20 5
15 16 20 9 15 14 1 12
19 1 25 19
20 8 5
20 8 5
1
19 16 5 3 9 1 12
12 1 19 20
22 15 20 5
23 1 9 20
1 14
1 14 4
20 8 5
15 6
13 1 11 5
20 8 1 20
9 20
19 15 13 5 15 14 5
15 6
23 9 20 8
19 21 18 5
8 5
23 1 19
13 9 12 12 9 15 14
16 1 25
9 14
1 19
15 6
20 15
15 6
2 5 3 1 21 19 5
8 1 4
3 18 15 19 19
14 1 20 9 15 14 1 12
20 8 5
20 8 5
15 6
8 1 19
9 14
6 15 18
8 9 7 8 5 18
9 20
1 14 4
20 15
1 7 1 9 14 19 20
2 21 20
2 21 9 12 4 9 14 7
23 15 21 12 4
15 6
15 6
15 6
6 15 18
16 5 18 3 5 14 20
18 9 4 5
13 15 19 20
9 14
16 15 19 19 9 2 12 5
2 5 8 9 14 4
18 9 7 8 20
20 15
3 12 9 14 20 15 14
8 1 22 5
23 1 20 5 18
3 1 19 5
1 14 4
20 8 5 18 5
19 21 18 5
3 8 9 3 1 7 15
19 8 5
14 15 20
13 15 18 5
20 8 5
8 9 19
9 20
8 15 21 19 5
20 8 5
16 5 18 3 5 14 20
13 1 14 25
20 15
23 1 19
15 6
2 12 1 3 11
15 22 5 18
14 5 23
6 15 18
9 14 3 12 21 4 5 19
2 15 20 8
20 8 5 25
23 8 15
1 14 4
3 12 9 14 20 15 14
20 8 5
6 15 18
20 8 5
1 14 4
23 1 19
15 6
13 9 12 12 9 15 14
16 18 5 22 1 9 12 5 4
1
1 14 4
2 21 20
12 1 19 20
20 8 9 19
1 14 4
9 14
20 8 5
20 8 1 20
1 23 1 25
2 21 20
20 8 21 19
23 8 15 12 5
15 14 5
20 8 5
13 9 12 9 20 1 14 20 19
6 21 18 20 8 5 18
20 8 5
20 8 5
13 1 18 11 5 20 19
25 15 21
20 15
1
20 8 5
20 8 5
23 1 19 8 9 14 7 20 15 14
1
20 15
19 8 15 21 12 4
1 12 20 5 18 14 1 20 9 22 5
23 1 19
19 1 9 4
20 15
9 14
19 21 3 8
3 1 14
20 8 5
3 12 9 14 20 15 14
20 8 5 18 5
20 8 5
19 1 9 4
8 9 13
20 23 15
8 1 22 5
20 15
12 1 19 20
23 8 15
19 1 9 4
20 8 5
15 6
20 8 5 25
7 5 20
1 14 4
23 8 9 20 5
20 15
20 15 23 14
9 14
1
3 15 21 14 20 25
20 15
20 8 5
9 14
4 9 18 5 3 20 9 15 14 19
8 1 22 5
15 6
6 15 18
1 23 1 25
1 12 13 15 19 20
15 6
23 8 15
20 8 5 25
19 1 9 4
20 8 5
1 14 4
22 5 18 25
23 8 9 3 8
19 21 16 16 15 18 20 5 4
20 8 1 20
20 8 5
16 1 18 20
8 5 18
8 1 22 5
20 8 5
15 14 5
19 1 9 4
16 18 15 2 1 2 12 25
20 15
19 5 22 5 14
6 15 18
7 15 22 5 18 14 13 5 14 20
16 21 20
20 8 5 9 18
7 1 13 5
15 6
16 18 15 2 12 5 13
2 15 15 11
23 1 19
23 9 20 8
15 6
12 15 21 9 19
8 9 7 8 12 25
23 9 20 8
1
14 15 20
13 15 18 20 7 1 7 5
25 15 21
9 14
1 14 4
20 8 5
8 5 18 5
20 8 1 20
3 15 21 14 19 5 12
20 21 18 14
19 8 1 18 5
18 15 13 1 18 9 15
2 5
25 15 21
7 1 13 5
9 14
3 15 21 12 4
20 15
23 9 20 8
3 15 21 12 4
14 15 20
8 9 13 19 5 12 6
1 14 4
20 8 5 18 5
9 20 19
20 8 5
23 5 18 5
9 14
20 8 5
20 8 1 20
4 5 13 15 3 18 1 20 19
20 8 5
20 15
1
9 20
6 15 18
9 19
12 5 7 1 12
20 8 5
6 15 18
19 3 8 15 15 12
19 20 15 3 11 19
8 1 22 5
20 8 5
22 1 3 21 21 13
19 1 25
19 16 5 5 3 8
19 1 25 19
15 6
1 20
1 14 4
12 15 20
14 9 7 8 20
9 14
15 6
20 8 5
4 15 26 5 14
19 1 9 4
23 1 19
20 8 5
20 15
18 5 1 12 9 26 5 4
20 8 5
6 15 18
15 6
19 8 15 23
20 8 5
5 19 20 9 13 1 20 5 4
20 8 1 20
18 9 14 7
9 14 20 5 12 12 9 7 5 14 3 5
23 15 13 5 14
15 6
8 9 19
20 8 15 21 7 8
20 8 5
20 8 5
2 21 20
13 5 13 15 18 25
20 15
23 5 18 5
20 8 5
1 14 4
20 8 5
23 18 9 20 5 19
3 1 19 5
20 8 5 18 5
15 16 5 18 1 20 9 15 14 19
20 23 15
15 6
19 15 13 5
16 18 15 7 18 1 13 13 9 14 7
20 8 5
8 5
11 5 25
1 16 16 5 1 18
1 19
8 1 19
19 1 9 4
9 19
20 8 5
6 15 18
5 12 4 5 18 12 25
11 9 3 11
1 22 1 9 12 1 2 12 5
20 8 5
3 8 9 5 6
14 5 23
16 15 12 9 20 9 3 1 12
23 9 20 8
9 14
1 4 13 9 14 9 19 20 18 1 20 9 15 14
20 8 1 20
23 1 19
20 8 5 9 18
20 8 1 20
20 15
9 14
5 24 1 13 16 12 5
18 15 19 19
2 5
23 1 20 5 18
20 15 15 11
16 9 12 15 20
8 1 4
8 1 22 5
15 6
8 1 19
2 21 9 12 20
9 14
23 1 19
20 8 1 20
19 8 5
15 6
20 8 5
9 14
8 5
3 8 9 5 6
3 1 18 5
14 5 1 18 12 25
23 8 15
19 20 18 5 1 11
1 20
19 5 22 5 18 1 12
20 8 1 20
8 1 19
20 8 5
6 18 5 14 3 8
20 8 5
19 20 18 9 11 5
20 9 13 5
20 8 5
19 5 5
23 1 19
1
9 20
19 1 25 19
20 8 5
20 8 5
18 5 1 3 8 5 4
19 3 15 20 20
20 23 15
20 8 5
1 20
6 21 12 12 25
19 21 14 4 1 25
12 9 20 20 12 5
15 6
20 8 5
18 5 6 21 7 5 5 19
20 8 1 20
15 6
20 8 5
20 8 5
20 8 5
20 8 1 20
20 8 5
10 21 4 7 5 19
1
8 9 13
23 15 18 11
14 15 20
3 15 21 14 20 25
8 1 22 5
20 8 5
20 8 5
10 21 19 20
20 8 5
20 15
2 15 18 14
15 6
16 9 20 3 8 5 18 19
20 8 1 20
4 5 19 3 18 9 2 5 4
6 15 18
13 15 19 20
7 9 22 5 14
9 14
6 15 18
3 1 13 16 1 9 7 14
3 15 21 12 4
1
2 21 20
20 8 5
15 6
23 9 20 8
20 8 5
4 5 19 3 18 9 2 5 4
15 6
13 15 19 20
15 21 18
7 5 20 19
19 1 25 9 14 7
20 8 5
5 22 5 14
23 1 19
8 15 23 5 22 5 18
1 14 4
9 14 22 5 19 20 9 7 1 20 9 15 14
25 15 18 11
20 8 5
23 8 9 20 5
23 5 12 12
1
19 15 12 9 4
9 14
2 21 19 9 14 5 19 19
19 15 13 5
14 1 20 9 15 14 1 12
15 6
20 8 5
2 25
18 5 1 12 9 26 5 4
13 5 24 9 3 15
20 8 5
5 24 16 5 3 20
6 9 22 5
1 4 4 5 4
20 8 5
2 21 20
20 15
13 15 18 5
5 22 5 14
6 1 19 20 5 18
16 12 1 25 5 18 19
19 1 9 4
20 15
1 14 4
20 15 21 7 8
15 6
20 8 5 25
8 1 22 5
1
20 8 5 25
6 9 22 5
4 9 4
1 19
20 8 5
20 8 5
1 14 4
8 9 19
6 15 18 3 5
8 9 19
1 14 4
6 15 18
1
1
20 15
20 8 1 20
23 5 5 11
20 8 5
8 1 19
9 14
12 5 7 9 19 12 1 20 9 15 14
21 14 4 5 18
20 8 5
20 1 11 5
23 8 5 20 8 5 18
20 8 5
3 15 13 16 1 14 9 5 19
20 8 5
1
23 9 12 12
6 9 14 1 14 3 9 1 12
19 20 5 16 8 5 14
20 8 5
23 5 5 11
20 8 5
13 15 19 20
6 15 18
3 15 21 12 4
3 1 18 5
2 9 7
20 8 5
1 4 4 19
20 23 15
16 15 9 19 15 14 9 14 7
19 1 9 4
8 1 19
19 1 14
12 1 20 5 18
6 15 18
6 18 15 13
18 5 13 5 13 2 5 18
14 15 20
18 21 14 14 9 14 7
4 1 18 11
5 21 18 15 16 5 1 14
20 8 5
9 14
22 9 19 9 20
15 16 5 14 5 4
1 14 4
20 15
3 15 13 16 1 14 9 5 19
20 8 1 20
1 14 4
23 1 19
20 8 5
20 15
2 25
1 12 20 8 15 21 7 8
2 15 20 8 5 18
23 1 19
18 5 1 12
20 8 5
8 15 21 19 5
1 20
13 15 18 5
2 5
1 14 4
20 8 5
20 15
1 12 23 1 25 19
20 8 5
2 15 1 18 4 19
1 14 1 12 25 19 20 19
5 22 5 14
9 14
19 5 18 9 15 21 19
20 18 1 9 14 9 14 7
5 22 5 14
9 14
9 20 19
1 14
2 21 20
19 1 9 4
20 15
15 6
1 14 4
19 5 22 5 14
2 25
20 8 5
20 15
20 8 9 19
18 5 17 21 5 19 20 19
20 8 5
8 15 19 16 9 20 1 12
23 1 19
20 8 5
1 14 4
3 9 20 25
1 6 20 5 18
20 8 5
3 1 14
19 5 14 9 15 18
20 8 5
19 1 9 4
20 8 5
1
15 6
23 8 15
19 8 5
20 8 5
18 5 6 21 7 5 5 19
9 14
19 1 25 19
15 6
9 20 19
12 9 7 8 20
13 1 11 9 14 7
8 1 19
19 1 25 19
1
1 14 4
23 8 9 3 8
19 8 1 11 5
20 15
1 14 4
23 8 9 3 8
9 14
19 5 16 1 18 1 20 5
15 6
19 1 25 9 14 7
8 1 22 5
14 15 20
1
1 14 4
20 8 5 25
15 6
4 9 4
23 9 20 8
1
1 14 4
14 5 23
15 14 5
20 8 5 9 18
2 9 12 12
23 15 18 11
2 15 20 8
9 14
5 22 5 14
20 8 5
15 23 14
20 15
20 8 5
20 8 1 20
23 8 9 3 8
20 8 5
13 15 19 20
19 8 5
1 14 4
19 1 9 4
20 15
8 9 19
1 20
6 18 15 13
13 15 14 4 1 25
9 20
8 1 22 5
4 9 4
9 20
18 5 1 19 15 14 19
8 1 22 5
8 1 19
20 8 5
9 19
20 23 15
1 12 18 5 1 4 25
19 8 5
23 8 15
19 1 25 19
3 1 14
4 1 25 19
19 1 9 4
1
7 5 20
1 7 1 9 14 19 20
13 9 12 5 19
6 18 15 13
20 8 5
2 1 11 5 18
20 8 5
20 8 5
5 14 4
19 5 1 19 15 14
6 15 18
15 6
23 15 21 12 4
1 14 4
20 8 5
16 8 15 20 15
19 8 5
2 9 7
19 15 13 5
20 8 5
9 14
18 21 14 19
16 1 19 19 9 15 14
20 15
11 5 25
1 12 13 15 19 20
1
15 6
23 5 18 5
13 15 19 20
3 15 21 12 4
13 1 11 5 19
1 6 20 5 18
17 21 5 5 14 19
3 1 18 5
3 1 14
19 20 21 4 5 14 20
6 15 18
9 14
4 5 16 20 8
19 8 9 16
9 14
19 5 18 2 9 1 14
8 15 23 5 22 5 18
25 15 21
15 6
23 9 20 8
20 8 5 18 5
20 8 5
1 14 4
2 25
7 1 18 25
13 15 21 14 20 1 9 14
20 15
8 9 19
16 18 15 6 9 20 19
6 1 20 8 5 18
20 15
9 14 22 1 19 9 15 14
9 14 3 12 21 4 5 19
9 14 3 12 21 4 9 14 7
14 15 20
19 8 15 15 20 9 14 7
8 1 22 5
20 8 5
4 21 13 2
20 15
20 8 5
9 19
16 1 25
20 8 5
25 15 21
1
20 8 5
19 20 9 12 12
14 15 18 13 1 12
13 1 18 18 9 1 7 5
10 21 4 7 5 19
20 8 5
20 8 1 20
1
20 8 5
20 1 11 5
3 15 21 12 4
1 14 4
9 14 4 9 22 9 4 21 1 12
23 8 15
8 5
23 8 15 12 5
23 8 15
15 14 12 25
6 15 18
20 15 15 11
20 9 13 5
1 14 4
20 8 5
15 14 12 25
15 21 20
2 9 20
20 8 5
7 18 1 14 4
19 20 25 12 5 19
1 14 4
3 1 21 19 5 19
20 8 5
7 5 20
9 19
1 14 4
9 14
16 15 12 9 3 25
18 5 3 5 9 22 9 14 7
3 1 13 16 1 9 7 14
16 18 9 13 1 18 25
10 21 4 7 5 19
1 14 4
20 8 5 25
1 14 4
16 5 18 3 5 14 20 1 7 5
20 8 5
23 8 1 20
15 6
8 1 22 5
1 12 20 5 18 14 1 20 9 22 5
12 5 1 19 20
20 8 5
19 1 14
23 8 5 14
23 8 15
1 14 4
20 8 5
8 9 13
14 15 20
3 12 9 14 20 15 14
15 6
1 14 4
20 8 5
3 1 18 19
23 1 19
15 14 5
8 5 12 4
19 1 9 4
1 20
1 14 4
7 1 13 5
20 8 5
14 15 20
11 9 14 7
20 15
2 5
15 21 20
15 6
20 8 5
9 20
8 5 18
20 8 5
19 1 25
23 5 18 5
20 8 5
14 5 23 19
15 6
16 18 9 3 5
12 15 23 5 18 5 4
19 5 1 19 15 14
20 8 5
15 6
8 9 19
19 8 5
1 19
25 15 21
23 18 1 16
9 20
16 12 1 14 19
15 6
3 1 19 5
8 1 19
3 1 14
19 15 13 5 15 14 5
8 15 21 19 5
1 14 15 20 8 5 18
20 5 12 5 22 9 19 9 15 14
1 12 13 15 19 20
23 1 14 20
20 8 1 20
1 14 4
2 1 19 5 2 1 12 12
3 15 12 15 18
1 14 4
10 21 19 20
9 14 4 21 19 20 18 25
20 8 5
3 1 14 14 15 20
19 1 9 4
23 8 1 20
15 20 8 5 18
6 15 18
8 9 19
20 15
2 25
23 5 18 5
15 6
15 6
2 5 7 1 14
15 6
18 15 12 5
19 1 25
1
9 20 19
10 21 19 20
23 5 18 5
7 1 13 5
23 9 20 8
13 1 25
15 6 6 9 3 5
20 8 5
20 8 5
6 15 18
23 8 15
10 5 23 9 19 8
12 1 19 20
9 14
9 19
4 15 5 19
15 14 12 25
2 5
19 1 25
4 15 9 14 7
6 9 14 1 14 3 9 1 12
20 8 5
1 14 4
8 9 19
4 18 9 14 11 9 14 7
2 15 20 8
20 8 5
1 14 4
1 14 14 15 21 14 3 5 4
19 9 20 21 1 20 9 15 14
19 8 15 21 12 4
1 20
23 8 9 20 5
9 14 22 5 19 20 9 7 1 20 15 18
20 8 1 20
15 2 10 5 3 20
15 6
16 18 5 19 19 21 18 5
19 15 13 5
20 8 5 25
20 5 1
20 8 15 21 7 8 20
1 14 4
23 8 1 20
20 8 5
20 8 5
20 8 5
20 8 9 19
14 15 20
1 12 23 1 25 19
1 13 15 14 7
5 1 3 8
20 8 5 25
2 1 19 11 5 20 2 1 12 12
1 12 19 15
23 5 5 11
13 15 14 4 1 25
3 15 14 3 18 5 20 5
13 1 14
10 15 21 18 14 1 12 9 19 20 19
20 8 5
1 7 1 9 14 19 20
23 18 9 20 20 5 14
7 5 20 19
1 14 4
13 1 25
10 21 19 20
20 15
15 6
19 1 9 4
8 1 19
20 8 5
3 15 21 16 12 5
20 15
15 16 5 14
15 6
14 5 23 19 16 1 16 5 18
14 15 20
10 21 19 20
8 1 22 5
16 15 12 9 3 5
9 14
19 15 13 5
8 5 1 18 9 14 7
3 8 1 16 20 5 18
5 24 16 5 3 20
23 9 20 8
20 8 1 20
20 8 5
25 15 18 11
3 21 20 19
23 1 19
20 8 9 19
2 9 4 5 14
1 14 25 20 8 9 14 7
20 8 5
6 15 18
13 1 14 25
19 20 15 14 5
23 8 15
20 8 5 9 18
6 21 14 4
16 5 18 19 15 14
20 15 15 11
19 15 21 12
8 9 19
7 1 13 5
4 5 22 5 12 15 16 13 5 14 20
20 8 1 20
1 14
15 6
6 12 1 22 15 18
20 15
1
23 15 18 12 4
23 15 21 14 4 5 4
2 15 25 19
19 8 5
3 1 19 5
20 8 5
23 1 19
16 18 9 19 15 14
22 5 18 25
1 21 20 8 15 18 9 20 25
23 1 19
20 15
5 22 5 14
2 5 12 15 14 7
20 21 5 19 4 1 25
1 14 4
2 25
8 9 19
20 8 5
23 8 5 14
1 19
19 20 1 18 20
8 1 19
14 15 20
1 14 4
6 15 18
20 8 5
9 20
15 14 5
20 15 15
8 1 4
8 5
20 8 18 15 21 7 8
16 15 15 18
16 21 20
2 5 12 15 23
23 9 20 8
15 6
16 5 18 3 5 14 20
23 5 19 20 5 18 14
1 14 4
1 14 4
20 8 5
1 14 4
9 20 19
6 15 18
20 8 5
9 20
3 18 15 23 4
1 19
12 9 20 20 12 5
13 21 18 4 5 18
10 9 13
23 9 20 8
5 21 18 15 16 5 1 14
15 21 20
1 14 4
15 6
15 6
16 1 18 5 14 20 19
1 9 18 16 15 18 20
9 20 19
2 25
1 14 4
19 5 1 20 20 12 5
13 21 20 21 1 12
20 8 5
19 20 1 20 5 19
20 8 5
13 5 14
1 14 4
19 5 22 5 14 20 8
6 15 12 12 15 23 9 14 7
16 18 9 3 5
6 1 18
23 9 20 8
23 9 20 8
19 5 22 5 18 1 12
8 1 19
20 8 5
20 8 1 20
15 6
20 8 5
20 8 5
2 25
3 1 19 5
6 9 14 1 14 3 5
2 21 20
20 8 5
23 9 20 8
6 18 15 13
19 5 15 21 12
8 1 22 5
14 15 20
9 14
20 8 5
22 9 18 21 19
15 14 5
15 6
6 1 22 15 18 9 20 5 19
20 15
9 20
19 20 1 20 5
18 15 13 1 14 9 1
9 14
9 14
6 1 13 9 12 9 1 18
18 5 6 21 7 5 5 19
1
9 14
13 1 14 25
6 15 18
20 8 5
6 18 5 14 3 8
4 9 19 3 21 19 19
20 15
1 14 4
20 8 5 18 5
2 25
20 8 5 9 18
8 1 19
20 8 1 20
4 15 26 5 14
13 1 14 1 7 5 18
20 8 5 9 18
1 2 15 21 20
19 3 8 15 15 12
23 9 12 12
20 18 1 4 9 14 7
16 15 15 18
23 5 18 5
2 1 18
7 18 15 21 16
19 1 9 4
3 15 21 12 4
23 15 18 11
8 5
20 8 1 20
3 1 13 16 19
9 14
1 18 15 21 14 4
20 8 5
13 15 18 5
20 15
25 15 18 11
20 8 1 20
20 8 5
23 18 9 20 20 5 14
23 8 5 14
20 8 5
23 1 19
19 5 22 5 18 1 12
20 8 5
23 5 18 5
20 8 5
23 8 15
20 8 5
19 20 25 12 5 19
1 14 4
9 14
20 8 5
1 18 15 21 14 4
23 5 18 5
20 8 5 9 18
14 5 24 20
3 1 14
13 5 13 2 5 18
8 1 19
15 22 5 18
8 1 22 5
23 5 18 5
20 8 5
20 8 5
9 19 19 21 5
16 15 12 9 20 9 3 9 1 14 19
6 15 18
1 14 4
1 7 1 9 14 19 20
1 14 4
15 6
3 15 21 12 4
20 8 1 20
20 8 5
20 8 9 19
13 9 12 12 9 15 14
1 19
8 9 19
16 15 23 5 18
23 9 20 8
23 8 1 20
20 8 5
2 5
5 14 4
20 8 5
1 12 15 14 7
15 14 5
20 8 5
13 1 20 3 8 5 19
9 14
7 9 22 9 14 7
1 14 4
8 1 19
3 12 1 19 19
20 8 5
20 1 2 12 5
15 21 20
16 5 14 4 12 5 20 15 14
23 15 14 4 5 18 19
20 15
6 18 15 13
9 14
1 14 4
8 1 22 5
20 8 5 25
9 19
9 19
15 6
1 14 4
19 1 9 4
15 6
3 8 1 14 7 5 19
20 8 5
4 18 9 22 5
13 1 20 5 18 9 1 12
3 15 21 12 4
1 14 4
20 15 23 14
16 12 1 25
21 14 9 20 5 4
15 6
16 18 1 9 19 5 4
19 9 7 14 9 6 9 3 1 14 20
8 9 19
16 8 15 20 15
12 1 19 20
15 6
13 1 11 5
19 8 5
2 18 1 14 19 15 14
16 18 15 2 12 5 13
19 1 9 4
20 8 5
15 6 6 5 18 5 4
20 23 15
20 8 5 25
23 9 20 8
16 12 1 25
15 6
23 15 18 11 5 4
9 14
20 15
23 1 14 20
3 1 14
16 18 15 10 5 3 20
20 8 1 20
1
9 14
19 1 9 4
23 9 20 8
15 21 20 19 9 4 5
12 5 7 1 12
9 20 19
16 1 9 4
1 20
1 14 4
1 14 4
20 15
19 1 9 4
9 14
20 8 5
1 12 23 1 25 19
23 5 5 11
4 15 5 19
4 9 1 12 15 7 21 5
5 3 15 14 15 13 9 3
9 14
20 15
20 8 1 20
19 1 9 4
15 6
20 8 5
19 15 13 5
3 8 1 9 18 19
1 14 4
20 8 5
23 15 21 12 4
13 1 11 5
8 1 12 6
8 9 19
6 15 18
23 8 9 3 8
13 15 18 5
2 5 3 1 21 19 5
1 14 4
5 24 20 18 5 13 5 12 25
23 8 5 14
20 8 5
19 9 7 14
1 7 1 9 14 19 20
20 8 1 20
19 21 13 13 5 18
20 8 5
19 20 1 20 5
16 12 21 13 13 5 20 5 4
20 8 5
9 14
6 18 5 5 4
15 6
7 15 1 12
20 8 5
2 18 15 1 4 5 18
20 15
3 8 9 3 1 7 15
1 19
13 5 1 14 19
1 14 4
1 12 13 15 19 20
14 5 24 20
19 1 14
19 3 5 14 5
16 12 1 14 20 19
2 18 9 14 7 19
16 12 1 14 14 5 4
19 20 18 9 11 5
16 5 1 3 5
19 8 5
12 21 14 3 8
15 6
13 15 18 14 9 14 7
1 14 4
1 14 4
23 8 15
20 8 5
6 1 13 9 12 9 1 18
2 21 20
9 19
23 8 15
5 24 9 19 20
15 21 20 12 5 20 19
9 14
8 5
1 6 18 9 3 1 14
1 12 19 15
20 8 5
2 5 12 15 23
8 5
1 14
19 1 9 4
20 8 5
6 18 9 4 1 25
23 8 1 20
20 15 15 11
20 8 1 20
19 8 15 21 12 4
23 8 9 20 5
2 21 19 9 14 5 19 19
20 15
2 21 20
6 1 13 9 12 25
5 14 15 21 7 8
8 9 19 20 15 18 25
8 1 14 4
19 20 1 20 9 15 14 19
5 1 19 20
9 14
20 8 5
9 19 19 21 5
20 8 5
9 14
19 1 9 4
3 8 1 9 18 13 1 14
5 19 16 5 3 9 1 12 12 25
20 8 5
4 5 16 1 18 20 13 5 14 20
15 6
1 12 23 1 25 19
20 8 5 9 18
8 9 19
20 15
1 14 4
15 21 18
16 12 1 25
20 8 5
2 1 19 9 19
6 18 15 13
2 5 20 23 5 5 14
19 20 1 18 20 19
20 8 9 19
4 5 12 12
13 15 19 20
20 8 5
6 1 13 9 12 25
6 15 18
7 15 1 12
20 8 5
1 14 4
1 18 5 1
16 12 1 25 5 18 19
15 6 20 5 14
20 8 5
1
23 9 20 8
23 9 20 8
8 1 22 5
20 8 5
16 12 1 25
6 15 18
2 1 19 5 2 1 12 12
14 15 20
6 15 18
6 18 5 5 8
9 14
16 5 18 18 25
6 1 12 12 5 14
1
1 4 4 5 4
20 8 5
19 15 13 5
23 8 15
25 15 21
8 9 19
23 15 21 12 4
8 1 22 5
20 8 1 20
1 7 1 9 14 19 20
1 14 4
20 5 1 3 8 5 18
23 9 12 12
2 5 7 1 14
20 8 5
12 9 20 20 12 5
20 15
2 21 9 12 4 9 14 7
15 6
20 15
19 1 25 9 14 7
21 14 4 5 18
14 1 20 9 15 14
8 15 23
16 15 12 9 3 5
16 1 14 5 12
20 8 1 20
1 14 4
25 15 21
6 15 18
2 21 20
15 6
23 15 18 11 9 14 7
15 14 5
12 1 20 5 18
9 20 19 5 12 6
7 5 20
20 8 1 20
23 1 19
15 6
1 2 15 21 20
23 15 21 12 4
15 20 8 5 18 19
9 14
1 20
18 5 16 15 18 20 19
15 6
19 1 9 4
19 21 3 3 5 19 19
10 21 19 20
1
23 9 20 8
9 14
19 21 18 5
14 1 20 9 15 14
1 14 4
2 9 12 12 9 15 14
16 12 1 14 14 5 4
7 18 15 21 16
23 1 19
20 8 5
3 15 14 6 5 18 5 14 3 5
16 18 15 16 15 19 1 12
20 8 5
3 15 14 22 9 14 3 5 4
9 14
20 15
23 15 15 4 19 20 15 3 11
3 15 12 12 1 16 19 5 4
23 1 19
15 14 5
20 8 1 20
6 15 18
15 14 12 25
20 15
20 8 5 25
15 6 6 9 3 9 1 12 19
15 6
9 14
20 8 5 9 18
3 15 21 12 4
23 8 1 20
20 8 5
23 15 21 12 4
9 14
20 18 9 1 12
20 8 5
9 14
6 18 1 14 11
9 14
1
8 9 19
2 5 7 1 14
6 1 19 20 5 18
16 5 18 6 15 18 13 1 14 3 5
3 18 9 20 9 3 9 26 5 4
14 15 20
15 23 14
25 15 21
8 5
23 5 5 11
1 20
6 5 23
8 5
12 1 19 20
23 8 15
3 1 14
19 5 14 19 5
20 21 18 14
20 23 15
20 8 5
23 1 19
23 1 19
23 9 12 12
20 15 4 1 25
15 6
1 19
15 6
3 15 21 12 4
12 9 13 9 20 5 4
23 15 18 12 4
8 9 19
20 8 1 20
5 1 19 5
20 8 5
9 19
20 15
7 18 15 23 9 14 7
19 21 9 20
20 15
23 1 19
14 15 20
1
23 8 1 20
1 14 4
9 14
20 8 1 20
2 21 20
20 18 5 5
14 15 20
8 1 18 2 9 14 7 5 18
23 5 18 5
21 14 4 5 18 19 20 1 14 4 9 14 7
23 8 15
2 5
16 9 3 11 5 4
9 14 3 15 13 5
23 15 18 20 8
1 14 4
20 8 5
12 15 14 7
20 8 1 20
3 9 20 25
9 20
6 15 18
20 18 1 9 14 19
20 8 5
20 8 5
20 15
19 1 9 4
7 5 20
23 8 9 3 8
15 6
19 20 1 20 5
20 15
20 8 5
3 15 14 20 18 15 12 19
2 21 20
9 14
9 19
15 6
20 8 5
14 15 20
13 15 14 20 8 19
20 8 5
12 15 3 1 12
13 1 11 5
15 6
13 15 18 18 9 19
1 14 4
19 1 9 4
9 19
1 14 4
9 20
16 12 1 25 5 18 19
12 5 1 22 5
9 20
20 8 5
20 8 5
8 1 19
20 8 5
20 8 5 25
19 5 1 18 3 8
20 8 9 19
20 8 5
20 8 5
20 8 5
20 15
9 20
20 8 1 20
20 18 9 5 4
1 14 4
8 1 19
1 3 3 5 19 19
20 8 5
1 12 20 8 15 21 7 8
15 14 5
2 5 3 1 21 19 5
13 1 18 18 9 1 7 5
15 21 20
1 3 20 21 1 12 12 25
16 15 9 14 20 5 4
13 5 18 5
20 8 5
8 1 19
20 8 5
14 15 20
23 9 20 8
15 6
8 1 22 5
20 8 5 25
1 20 20 1 3 11
20 8 5
13 1 14 25
20 8 5
19 15 13 5
5 24 16 5 3 20 5 4
25 15 21 14 7
1
16 15 19 9 20 9 15 14
23 1 19
1 7 1 9 14 19 20
20 8 5
9 19
15 6
25 15 18 11
15 6
20 15 15 11
1 14 4
20 8 5
3 1 14
15 6
20 8 5
1 14 4
20 23 15
8 1 19
14 21 13 2 5 18 19
20 8 5
23 9 20 8 9 14
20 15
16 5 1 3 5
2 9 7
2 25
20 8 5
19 20 1 20 5 19
19 20 18 9 11 5
25 15 18 11
20 8 5
15 20 8 5 18
20 8 5
19 1 9 4
9 20
2 21 20
8 5
18 5 13 5 13 2 5 18
23 8 15
3 15 21 12 4
23 9 20 8
13 21 19 3 12 5
16 18 15 10 5 3 20
20 15
14 5 23
9 14
7 15 22 5 18 14 13 5 14 20
1 2 15 21 20
20 8 5
23 1 19
8 1 22 5
16 18 9 3 5
20 15
20 23 15
20 8 5 9 18
7 5 20
3 8 9 12 4
20 15
9 4 5 1 19
3 15 21 12 4
5 22 5 14
20 8 5
15 16 5 14
20 8 1 20
1 21 4 9 5 14 3 5
8 5
10 15 9 14 20
16 15 23 5 18
7 9 22 9 14 7
1 19
1 14 4
15 6
21 14 9 20 5 4
13 9 24 5 4
15 6
2 25
13 15 18 5
20 8 5
20 8 5
13 15 14 9 20 15 18 9 14 7
13 9 12 12 9 15 14
20 15
7 5 20
6 15 18
16 15 9 14 20 19
10 15 14 5 19
8 1 22 5
8 5 18
15 6
25 15 21
16 18 15 7 18 1 13 19
20 8 5
1 12 18 5 1 4 25
20 8 5
20 8 5 9 18
12 15 19 20
20 8 5
20 8 5
15 21 18
15 6
15 14 5
20 15
16 15 19 19 9 2 12 5
15 6
19 1 9 4
23 15 21 12 4
19 1 9 4
9 20
1
16 15 12 9 3 5
1 14 4
9 14
7 15 22 5 18 14 13 5 14 20
8 15 18 19 5
16 18 15 16 15 19 1 12 19
15 6
20 8 5
9 14 22 15 12 22 5 4
23 5 18 5
20 15
16 15 19 19 9 2 12 5
1 14 4
23 8 5 20 8 5 18
15 14 5
13 9 12 23 1 21 11 5 5
20 8 5 9 18
3 1 18 5
19 20 15 18 5
12 5 7 1 12
8 9 19
4 15 14 5
6 15 18
1 14 25 15 14 5
23 15 21 12 4
20 8 5
19 9 4 5
18 5 19 21 12 20 19
19 5 14 19 5
20 8 5 9 18
14 15 20
8 1 14 4 12 5
12 5 1 19 20
19 20 18 21 7 7 12 5
19 3 15 18 9 14 7
20 8 9 19
8 1 22 5
9 14
15 6
15 14 5
4 5 3 12 9 14 5
13 15 19 20
1 19 11 5 4
20 8 5
1 14 4
23 8 5 14
20 8 5 25
21 14 9 15 14
20 8 5
15 6
20 8 5
12 1 14 4 12 15 18 4 19
20 8 5
4 9 19 20 18 9 3 20
19 5 19 19 9 15 14
20 15 16 16 5 4
20 8 5
13 15 18 5
16 1 19 19 5 4
16 5 14 20 1 7 15 14
9 14
15 22 5 18
15 6
9 20
19 3 15 16 5
6 15 18
6 15 18
19 9 7 14
9 20 19
19 8 15 21 12 4
20 9 13 5
20 15 15 11
15 21 20
6 15 18
19 8 5
1 6 20 5 18 14 15 15 14
20 15
1 12 19 15
20 8 5
20 8 1 20
8 9 19
19 5 14 20
23 9 20 8
3 15 13 6 15 18 20 1 2 12 5
20 8 5
23 9 12 12
16 18 9 13 1 18 25
23 15 21 12 4
19 1 9 4
19 21 9 20
19 1 9 4
14 15 9 19 5
1
10 15 2
2 25
20 8 1 20
5 22 5 14
8 1 14 4
20 8 1 20
15 6
6 15 18
1 2 15 21 20
8 9 12 12 19
9 14
20 8 18 15 21 7 8
19 1 25 9 14 7
2 21 20
20 8 5
18 15 2 5 18 20
23 9 12 12
19 5 22 5 18 1 12
9 19 19 21 5 19
14 15 20
20 8 18 15 21 7 8
9 20
20 8 5
20 18 21 13 1 14
20 8 5
1
23 5 18 5
1 14 4
6 9 22 5
1 7 1 9 14 19 20
7 1 13 5
20 8 1 20
15 6
20 15
20 15
1 14 4
1
19 3 8 15 15 12
20 8 5 18 5
23 8 5 14
6 15 18
9 14
6 15 18
18 5 16 21 2 12 9 3 1 14 19
16 12 1 25 5 18 19
1
20 8 5 18 5
20 8 9 19
1 18 1 6 1 20
2 25
14 15 20
15 18 7 1 14 9 26 1 20 9 15 14 19
12 5 1 7 21 5
12 9 19 20 5 4
16 18 15 13 15 20 9 15 14 19
20 8 5
20 15
7 5 20
19 16 5 1 11 9 14 7
15 6 6 9 3 9 1 12 19
25 15 21
7 15 22 5 18 14 13 5 14 20
1 20
20 15
20 8 5
18 5 16 15 18 20 19
2 5 20 23 5 5 14
20 8 5 25
3 15 21 12 4
1 14 4
8 15 21 19 5
20 8 1 20
15 21 18
3 15 13 16 1 14 9 5 19
2 5
23 9 12 12
20 8 5
4 5 1 20 8
1
8 9 19
20 8 1 20
20 15
9 14
3 15 21 12 4
1 14 4
20 8 5
20 8 5
1
18 9 4 5 19
14 5 23 19 16 1 16 5 18
1
3 15 6 6 5 5
2 5 20 23 5 5 14
20 15 20 1 12
1
2 5 3 1 21 19 5
19 1 13 5
1 14 4
18 21 12 5
4 5 1 20 8
20 8 5
20 5 19 20
9 14 22 5 19 20 13 5 14 20 19
20 8 5
9 14
13 1 14 1 7 5 18
20 8 1 20
14 5 5 4
4 9 6 6 5 18 5 14 20
20 8 5
1 14 4
13 9 4 4 12 5
13 1 3 8 9 14 5 19
8 5 12 4
9 14
20 8 5 25
14 15 20
3 15 21 12 4
9 14
14 5 24 20
1 14
1 19
6 18 15 13
23 18 15 14 7
20 8 5
6 15 18
2 21 20
1
14 15 20
15 6
3 1 18 5
9 20
23 18 9 20 5 18
20 18 1 14 19 13 9 20 20 5 4
1
8 9 19 20 15 18 25
19 5 18 22 9 3 5
6 15 18
1 14 4
23 9 12 12
20 8 5
2 21 19 5 19
22 15 20 5
19 20 15 18 5
1
2 5 5 14
20 8 5
8 9 13
2 25
1 14 4
25 15 21
20 8 5
2 5 3 1 21 19 5
13 15 19 20
16 5 18 3 5 14 20
16 5 15 16 12 5
5 22 5 14
23 8 15 19 5
23 9 12 12
19 5 1 19 15 14
19 20 15 18 25
20 15
8 5 1 4
20 8 5
20 15 15 11
1
1 14 4
4 9 6 6 9 3 21 12 20
20 8 5
20 8 1 20
18 15 12 12
23 8 15
23 8 5 14
23 9 12 12
20 15
15 6
14 5 23
25 15 21
20 8 5 25
13 9 3 8 1 5 12
15 6
1 2 15 21 20
13 9 24
23 15 13 5 14
15 6
12 5 1 22 5
19 25 19 20 5 13 19
19 1 9 4
19 5 22 5 18 1 12
9 20 19
5 24 5 3 21 20 9 22 5 19
20 8 5
20 8 5
15 6
20 8 5
5 13 5 18 7 5 4
20 8 5
20 8 5
20 15
19 20 18 9 11 5
20 8 5
16 18 5 19 19 21 18 5
13 15 18 5
8 5
2 12 1 3 11 19
20 8 5
1 14 4
15 14 5
15 6
8 1 19
2 5
9 14
8 1 22 5
5 22 5 14 20 21 1 12 12 25
20 8 5 25
13 9 12 12 9 15 14
20 15
1
20 1 25 12 15 18
6 15 18
2 21 20
4 5 13 1 14 4 19
14 15 20
15 6
1 19
20 8 18 15 21 7 8 15 21 20
20 8 5
20 15
1 14 4
23 15 18 12 4
4 5 13 15 3 18 1 20 9 3
2 5 5 14
20 8 5
6 9 14 1 14 3 5
2 5
9 20 19
1 14 25 23 1 25
9 14
9 14
8 1 19
15 21 18
15 6
20 8 15 21 19 1 14 4 19
20 8 9 19
16 18 15 6 5 19 19 15 18
3 15 21 12 4
7 1 18 4 5 14
15 6
15 6
7 18 15 21 16
20 8 5 18 5
9 19
13 5 5 20
1 14 4
3 15 21 12 4
20 15 23 14
20 8 5
18 21 14 14 9 14 7
13 9 12 12 9 15 14
9 20
23 1 19
20 15
20 15 15
23 8 9 3 8
20 8 1 20
15 6
4 5 3 12 1 18 5 4
3 1 13 5
14 15 20
9 14
3 18 5 4 9 20
4 15 5 19
15 14 5
20 8 5
6 15 18
14 1 19 20 25
20 15
20 8 5
8 15 23 5 22 5 18
20 8 5
23 8 15
16 5 15 16 12 5
2 1 20 20 9 14 7
15 21 20
20 8 5
2 5 3 1 21 19 5
5 22 5 18 25 15 14 5
20 8 15 21 7 8
15 6
8 9 19
6 1 13 9 12 25
1 12 13 15 19 20
23 1 19
4 9 19 20 18 9 3 20
14 5 23
15 14 5
20 8 5
13 9 12 12 9 15 14
2 21 19 8
9 14
6 15 18
20 15 20 1 12
3 15 21 12 4
5 14 20 9 18 5
20 8 5
13 21 18 4 5 18
3 9 20 25
20 8 1 20
1
14 5 5 4 19
20 23 15
15 22 5 18
20 8 5
20 8 1 20
15 6
1 20
3 18 1 20 5 18
9 14
20 8 5
23 8 15
20 8 5
20 5 24 1 19
23 18 15 14 7
8 9 20 20 9 14 7
20 8 5
3 8 1 18 7 5 19
12 9 20 20 12 5
2 21 19 25
8 9 19
9 20
20 8 9 14 11 9 14 7
1 13 5 18 9 3 1 14 19
1 20 15 16
6 15 18
2 25
20 8 5
12 15 15 11 5 4
1 12 15 14 7
20 15
20 9 13 5
15 6
2 1 4 12 25
2 5 7 1 14
20 8 5
5 24 16 5 3 20 5 4
5 6 6 15 18 20 19
19 1 9 4
1 14 4
1 14 4
19 20 1 20 5 19
20 8 5
13 15 18 5
20 8 5
20 8 5
23 9 12 12
9 14
15 6
2 25
15 6
20 8 5
6 15 18
13 15 22 5
20 15
16 1 18 20
15 6
20 23 15
5 24 1 3 20 12 25
9 20 19
20 8 5
9 19
8 1 19
23 1 19
14 15 20
12 1 18 7 5 19 20
20 9 13 5
13 9 20 3 8 5 12 12
19 5 5
19 1 9 4
2 5
20 8 1 20
20 15
7 15 22 5 18 14 13 5 14 20
23 8 9 3 8
20 8 5
20 8 5
20 15
23 8 5 14
15 23 14
4 9 4
5 22 5 14 9 14 7
22 9 19 9 20 5 4
16 15 19 9 20 9 15 14
6 15 18
11 14 15 23 19
20 8 1 20
20 8 5
23 15 21 12 4
19 15 13 5
1 12 19 15
19 8 5
8 5 18 5
15 6
1 14 4
23 8 15
8 15 12 12 25 23 15 15 4
6 15 18
20 8 5
20 18 1 9 14 9 14 7
9 20
1
1 14 4
1 14 4
20 8 1 20
1
23 8 15
7 1 20 8 5 18 5 4
20 8 5 18 5
16 18 15 3 5 5 4 9 14 7 19
19 15 13 5
19 20 1 20 5
23 1 19
15 6
1
15 14 12 25
19 21 2 10 5 3 20 19
1 14 4
20 15
8 9 19
4 9 19 5 1 19 5
9 14
16 1 25
23 1 19
9 14
7 1 13 5
15 18 12 5 1 14 19
3 12 1 9 13
20 8 5
20 8 5 25
20 21 5 19 4 1 25
16 12 1 3 5
1 14 4
6 15 18
23 8 1 20
9 14
6 9 22 5
23 9 12 12
20 8 1 20
15 6
20 8 5
19 8 5
23 8 15
9 20 19
20 8 5
5 24 1 3 20 12 25
9 14
23 8 9 3 8
16 15 16 21 12 1 18
20 8 5
20 8 5
8 1 19
8 15 21 19 5
13 9 12 5 19
20 8 5
10 21 19 20
9 19 19 21 5
15 6
3 15 14 6 5 18 5 14 3 5
10 21 16 9 20 5 18
23 9 12 12
20 8 5
19 1 9 4
20 8 5
19 1 9 4
8 5
20 8 5
3 15 12 21 13 2 9 1
16 18 15 10 5 3 20
16 5 18 3 5 14 20
18 1 3 5 19
5 3 15 14 15 13 9 3
12 5 7 1 12
23 9 12 12
8 1 4
9 14 22 5 19 20 9 7 1 20 15 18 19
20 8 5
15 6
2 15 20 8
3 8 1 9 18 19
20 8 5
2 5 19 9 4 5 19
20 15
15 6
20 8 1 20
15 6
20 8 15 21 7 8 20
20 8 5
20 8 5
15 6
23 8 15
20 8 1 20
12 15 15 11 5 4
5 6 6 15 18 20 19
19 20 1 20 5
6 9 14 4 9 14 7 19
6 21 14 4
8 5
18 5 3 5 9 22 5 4
20 5 1 13 19
19 1 14 20 1
6 15 18
15 6
3 1 21 19 5 4
20 8 5
13 9 19 19
20 8 5
1
8 1 22 5
19 20 21 4 25
20 8 1 20
9 14
1 14 4
9 14 22 15 12 22 9 14 7
6 15 18
20 8 5 19 5
16 18 15 2 12 5 13 19
23 15 18 12 4
1 14 4
23 8 1 20
2 12 15 3 11 19
19 16 15 20
20 8 1 20
5 14 20 5 18
6 15 18
20 8 5
7 15 22 5 18 14 13 5 14 20
20 8 9 19
2 5
20 8 5
16 5 14 1 12 20 25
1 14 4
1 14 4
23 8 9 12 5
20 18 21 13 1 14
23 9 14 4
20 8 5
20 15
20 15
15 6
8 1 4
20 8 5
20 8 5 18 5
20 8 5
20 15
6 12 5 4
16 9 20 3 8 5 18 19
8 1 12 6
20 8 5
20 8 1 20
20 8 5
20 8 5
1 14 4
12 1 19 20
20 15
20 8 5
20 8 5
23 1 19 8 9 14 7 20 15 14
19 15 13 5
19 5 18 9 15 21 19
15 6
2 5
23 5 5 11
19 1 25 19
3 8 9 5 6
25 15 21
14 5 23
3 8 1 14 7 5
3 15 21 12 4
19 1 9 4
25 15 18 11
20 8 5
1 6 20 5 18
13 15 18 5
23 8 15
23 8 15
1 18 5 1 19
6 15 18 13 5 18
20 15
23 15 21 12 4
19 5 1 19 15 14
20 9 13 5
20 15
8 5
1 20
9 20
10 21 19 20 9 3 5
16 21 20
20 8 5
25 15 18 11
1 14 4
20 8 5
20 15
23 1 19
23 1 19
1 14 4
9 14 22 15 12 22 5 4
3 1 18 5
19 1 12 1 18 25
1 14 4
23 1 19
23 15 21 12 4
20 8 5
1 14 4
23 8 15
23 8 15
19 25 19 20 5 13 19
1 6 20 5 18
23 8 1 20
23 9 12 12 9 1 13
12 1 25 9 14 7
20 15
19 20 1 18 20
20 8 5
20 8 5
20 8 5
6 15 18
23 9 12 19 15 14
14 15 14 5
2 5
18 5 6 21 7 5 5 19
20 15
14 5 20 23 15 18 11
7 1 22 5
9 19
3 1 12 12 5 4
8 1 19
23 9 20 8
2 5
19 8 15 21 12 4
22 5 18 25
20 8 5
20 8 1 20
20 8 5
6 18 5 14 3 8
20 8 5
8 1 19
1
9 20 19
9 20
20 5 19 20 9 13 15 14 25
6 15 18 13 1 20
1
5 14 4
16 5 18 6 15 18 13 1 14 3 5
9 14
4 9 4
19 20 5 16 19
23 1 19
14 15 20
9 14
4 5 1 20 8
15 6
13 9 12 12 9 15 14
5 1 3 8
15 6
20 8 5 25
15 20 8 5 18
1 20
15 6
19 9 13 16 12 5
23 15 21 12 4
15 6
1 2 15 21 20
15 6
9 20 19 5 12 6
1
16 15 16 21 12 1 18
6 15 18
9 14
7 5 18 13 1 14 25
15 23 14
20 8 9 19
20 15
1
1 14 4
1 14 4
1
25 15 21
19 15 13 5
1
20 8 1 20
1 6 20 5 18
20 15
20 8 5
4 9 6 6 5 18 5 14 20
1 14 4
15 6
16 5 18 6 15 18 13 1 14 3 5
19 1 9 4
6 21 14 4
8 1 4
9 20
7 15 22 5 18 14 13 5 14 20
20 8 5
2 5 7 21 14
15 6
6 15 18
1 18 20 19
23 5 18 5
3 15 13 13 21 14 9 20 25
20 8 1 20
3 21 18 18 5 14 20
20 8 5
20 8 5
1 20
15 14 5
15 20 8 5 18
20 8 5
5 22 5 14
13 1 18 1 4 15 14 1
13 9 12 12 9 15 14
20 8 1 20
20 1 12 11
5 22 5 18 25
20 8 5 9 18
19 1 9 4
18 15 1 4
6 15 18
20 8 5
13 1 25
6 15 18 13 5 18
3 1 18 5 5 18
10 21 19 20
3 1 13 5
20 8 1 20
2 21 20
12 15 14 7 5 18
20 8 5
1 14 4
1 14 4
8 1 19
20 15
1 19
20 8 5
20 15 15 11
8 1 22 5
20 8 5
18 15 12 12
19 16 5 14 20
1 14 4
8 9 19
23 9 20 8
9 14 3 12 21 4 9 14 7
23 9 12 12
15 21 20
7 18 1 4 5
20 15
23 8 15
15 6
20 8 5
1 13 5 18 9 3 1 14 19
3 15 1 3 8
8 15 23 5 22 5 18
16 15 15 18
19 8 5
3 15 13 16 1 14 25
18 5 14 20
19 8 15 21 12 4
9 14
23 15 18 11 9 14 7
20 8 5
19 21 3 8
16 12 1 25 5 18 19
20 8 9 19
8 1 19
6 15 18
20 15
14 15 20
20 8 5 25
25 15 18 11
9 14
6 15 18
22 1 12 12 5 25
23 9 20 8
1
1 14 4
6 15 18
15 6
1 20
23 8 9 3 8
20 8 5
19 1 9 4
20 8 5
1 2 15 21 20
20 8 5
1 3 3 5 16 20
6 9 19 8
4 9 5 4
20 8 5
20 8 5
20 8 5
13 1 11 5
9 14
5 14 4
20 8 5
15 14 5
20 8 5
20 8 5
2 21 20
9 19
20 8 5
20 15 4 1 25
15 6 6 9 3 9 1 12 19
8 9 13
6 15 18
20 8 5
5 22 5 14
20 8 5 25
15 6
20 15
9 14
2 21 19 9 14 5 19 19
20 8 5
8 1 19
15 6 6 9 3 9 1 12 19
20 8 5
12 1 19 20
5 22 5 18 25 2 15 4 25
20 15 15 11
20 8 5 25
2 21 20
1 14 4
9 14 22 5 19 20 9 7 1 20 9 15 14
20 18 1 9 14 9 14 7
16 12 1 25
9 14
16 12 1 25 5 18 19
1 20
10 21 19 20
8 1 22 5
20 8 9 14 7 19
20 8 5
20 8 1 20
20 8 5
20 8 5
15 14 12 25
14 1 20 9 15 14 1 12
20 15
1 12 19 15
15 6
14 1 20 9 15 14 1 12
19 20 18 5 5 20 19
3 1 14
20 8 5
20 8 5
20 8 5
23 15 21 12 4
16 18 15 2 12 5 13
16 1 3 20
23 9 20 8
23 9 12 12
4 5 1 20 8
20 15
20 8 18 15 21 7 8
8 5 18 5
19 1 9 4
2 18 15 1 4 5 18
1 14 4
20 8 5 25
20 9 14 25
20 8 5
2 15 20 8
19 1 9 4
8 9 19
19 1 9 4
20 8 5
23 15 21 12 4
23 15 18 12 4
8 1 22 5
15 6
6 15 18
1 14 4
12 1 19 20
15 6
1 7 1 9 14 19 20
20 1 12 11
14 15 20
14 5 5 4
14 9 7 8 20
13 15 18 5
1 7 5 14 3 25
1
9 19
20 8 5
20 8 5
19 1 9 4
20 8 1 20
6 15 18
20 8 5
20 8 15 21 7 8
8 5
12 1 19 20
13 15 2
20 8 5
15 6
1 20
5 24 16 5 3 20
3 15 21 12 4
15 6 6 9 3 9 1 12 19
2 5 3 1 21 19 5
1 14 4
6 15 18
15 14 5
9 14
4 5 1 12
10 15 8 14
20 8 5
9 14
19 5 5 9 14 7
6 15 18
20 8 5 25
20 15 12 4
3 1 14
20 15
20 8 5
20 8 5
16 5 18 19 15 14
8 9 19
23 9 20 8
15 21 20
5 12 19 5
1 14 4
9 19
1 14 4
1 14 4
13 9 12 12 9 15 14
19 1 9 4
20 8 5
1 20
18 15 1 4
20 8 5
9 20 19
20 8 5
19 15 13 5
19 20 1 20 5 19
1 14 4
16 18 5 19 5 14 20
20 8 5
20 5 1 3 8 5 18 19
9 14
19 1 9 4
1 14 4
23 9 20 8
20 8 5
19 1 9 4
19 13 9 20 8
3 15 14 20 18 15 12
19 20 1 20 5 19
20 23 15
2 9 12 12
13 15 19 20
20 8 5
9 14
20 8 5
12 9 13 15 21 19 9 14 5
2 15 15 19 20
15 6
14 15 20
20 8 15 21 7 8
15 6
20 8 5
11 9 14 4
15 6
20 8 5
20 15
23 8 9 20 5
19 1 25 19
1 4 13 9 20 20 5 4
15 6
13 1 14 1 7 5 19
20 8 5 9 18
8 5 12 4
20 8 5
19 3 5 14 5
20 8 5
20 8 5
11 9 4 4
20 8 5
1 14 4
1 14 4
20 15
2 21 19 9 14 5 19 19 5 19
10 21 16 9 20 5 18
23 9 20 8
15 6
9 14
20 15
20 8 5
20 15
1 12 15 14 7
1 20
1 2 15 21 20
6 15 18
1 14 4
1 14 4
14 15 18 20 8
20 15
20 8 5
20 8 5 25
20 8 9 19
23 15 18 12 4
9 14
20 8 1 20
14 15 20
15 6
9 14
20 8 5
20 15
20 8 5
3 12 9 14 20 15 14
15 6
25 15 21
20 8 5
8 9 19
4 5 13 15 14 19 20 18 1 20 5 19
19 15 14
6 15 18 13 1 12
3 15 13 9 3
9 14
15 6
19 8 5
19 1 25
23 9 20 8 9 14
20 8 1 20
9 20 19
18 5 12 1 20 9 22 5 12 25
19 9 14 3 5
16 1 18 11
25 15 21
19 1 12 1 18 25
20 15
15 20 8 5 18
9 14
8 1 16 16 25
4 5 5 16
18 9 7 8 20
12 1 19 20
1 2 15 21 20
8 9 13
8 9 19
3 1 12 12 19
13 5 14
6 12 15 18 9 4 1
20 9 13 5
1 14 4
22 5 18 25
20 15
2 5 20 23 5 5 14
20 8 5
1 14 4
16 1 3 11 23 15 15 4
8 5
1 16 16 5 1 18 1 14 3 5
1 14 4
1 20
20 5 18 13
7 1 13 5
23 9 12 12
19 21 9 20
23 5 12 12
15 6
1
19 1 9 4
4 15 14 5
9 14 22 15 12 22 5 4
20 8 5
15 6 6 9 3 9 1 12 19
7 5 20 19
19 1 9 4
20 8 5
8 1 19
15 6
23 8 15 19 5
16 18 9 4 5
20 8 5
9 14
2 15 15 11
13 21 19 3 12 5
20 8 5
14 15 20
20 8 1 20
9 14 3 12 21 4 9 14 7
20 8 1 20
19 20 18 9 11 5
9 14
9 14
23 1 19
14 15 18 20 8
14 15 20
16 21 18 19 21 5 4
9 14
15 23 14
8 5
5 24 1 3 20 12 25
20 8 5
14 5 24 20
8 1 19
15 6
20 8 5
10 21 19 20
14 5 23
9 14 22 5 19 20 13 5 14 20
1 19
9 14
8 9 19
19 1 9 4
20 8 5
1 20
23 9 20 8
20 15
6 15 18
23 15 18 12 4
6 18 15 13
4 1 25 19
1 23 1 25
2 21 20
19 1 9 4
9 14
9 14
19 3 8 15 15 12
12 1 3 11
9 14
23 8 5 14
16 18 15 2 1 2 12 25
10 21 19 20
23 8 9 3 8
1 14 4
16 18 15 4 21 3 20 19
20 18 1 4 9 14 7
2 5 18 18 15 1
23 8 9 3 8
19 3 9 5 14 3 5
20 15
2 15 18 4 5 18
19 1 9 4
11 14 15 23 14
2 5 8 1 12 6
1 19
2 25
8 9 19
2 21 20
15 6
20 8 5 9 18
15 6
19 1 25 19
9 19
23 8 5 14
1
16 5 18 3 5 14 20
15 21 18
15 6
20 8 5
6 15 18
9 14
15 14 5
23 15 21 12 4
13 9 12 12 9 15 14 19
25 15 18 11
5 22 5 14
8 5 12 16
23 1 25 19
15 6
12 1 19 20
2 5 20 23 5 5 14
15 6
8 1 19
20 15
1 2 15 21 20
20 1 18 7 5 20
4 1 25 19
20 8 5
3 1 18 19
3 1 14
20 8 5
20 8 5
18 5 3 5 14 20
15 6
23 9 20 8 9 14
20 8 5
3 5 9 12 9 14 7
13 9 24 5 4
6 15 18
15 6
12 15 19 5
25 15 21
23 15 18 12 4
14 15 20
20 8 9 19
23 1 19
19 15 13 5
7 15 22 5 18 14 15 18
1 14 4
1
19 8 1 18 5
16 15 12 9 3 25
4 1 14 7 5 18 15 21 19
18 1 16 9 4 12 25
20 8 5
1 14 4
1 12 23 1 25 19
1 14 4
8 9 19
19 1 9 4
22 15 20 5 4
20 8 5
1 6 20 5 18
13 15 22 9 14 7
20 8 5
6 9 22 5
8 5 18 5
20 8 5
5 22 5 14 20
20 8 5
4 5 6 5 1 20
18 21 14
1 19
1 14 4
12 1 18 7 5 19 20
6 15 18
20 15
15 6
18 5 6 21 19 5 4
8 1 22 5
10 5 6 6
3 15 21 12 4
1 20
18 5 6 15 18 13
3 15 14 3 5 14 20 18 1 20 5
16 1 18 20
20 8 5
20 8 5 19 5
23 8 15
6 15 12 12 15 23
3 15 13 16 21 20 5 18
20 8 5
3 15 13 2 9 14 9 14 7
20 18 9 16
19 1 9 4
25 15 21
9 14 20 5 18 5 19 20 5 4
18 5 19 9 4 5 14 20 19
18 5 7 9 19 20 5 18 5 4
15 6
2 5
20 8 5
8 15 21 19 5
20 8 5
8 1 4
23 1 19
19 1 9 4
20 8 5
5 14 3 15 21 18 1 7 9 14 7
15 6 6 9 3 9 1 12 19
6 9 5 12 4 19
3 15 23 2 15 25 19
1 12 15 14 7
20 8 5
20 8 5 18 5
1 13 15 14 7
20 8 5
1
25 15 21
20 8 5
20 15
20 15
2 5 20 20 5 18
9 14
15 6
20 8 5
20 15
6 1 9 12 19
12 1 19 20
20 8 5
6 15 18
1 14 4
20 8 5
13 9 20 3 8 5 12 12
1 14 4
5 24 16 5 18 20 19
20 8 5
3 8 1 9 18 19
6 1 3 5 19
13 9 7 8 20
23 1 19
15 6
4 15 9 14 7
19 15 13 5
13 1 20 3 8
12 1 19 20
20 8 5
6 15 18
1 14 4
20 15
19 5 22 5 18 1 12
19 1 14
20 8 5
20 15
15 16 5 14 5 4
19 21 14 19 5 20
20 8 5
7 1 13 5
6 15 18
20 8 5
23 15 18 20 8
3 1 12 12 19
8 1 22 5
19 9 24 20 8
1 14 4
19 1 9 4
20 8 5
25 15 18 11
14 15 20
20 15
6 15 18
3 15 14 20 18 15 12
18 5 6 15 18 13
15 6
4 5 1 20 8
16 18 15 2 12 5 13 19
20 8 5
8 9 19 20 15 18 25
6 21 14 4
1
23 18 9 20 20 5 14
9 20 19
23 9 12 12
19 8 5
20 8 5 25
23 5 4 4 9 14 7
15 6
23 15 18 11 19
20 8 5
1
15 21 18
20 8 5
15 6
20 15
20 8 1 20
13 1 4 5
15 6
3 12 9 14 20 15 14
14 5 1 18
8 9 19
19 5 18 22 9 3 5
1 14 4
20 8 5
19 5 18 22 9 3 5
16 18 9 4 5
9 14
23 5 12 12
20 15 23 14
16 18 1 3 20 9 3 1 12
14 5 23
19 5 1 19 15 14
8 1 4
13 15 18 5
20 8 5
20 8 5
20 8 5
25 15 18 11
20 15
23 15 18 20 8
8 5
1 19
8 1 22 5
13 1 10 15 18
20 8 5
2 25
2 25
3 15 14 20 1 3 20 19
1
23 8 5 14
9 14 20 5 18 14 1 20 9 15 14 1 12
15 6
20 8 5
13 15 19 20 12 25
23 8 15
19 20 1 4 9 21 13
20 15
19 1 9 4
2 21 9 12 4 9 14 7
19 20 1 20 5
23 8 5 14
1 3 20 9 15 14 19
23 15 18 11 5 18 19
1 14 4
20 8 5
20 5 18 13
20 8 5
20 8 1 20
1 14 4
6 15 18 13 5 18
9 14
7 5 18 13 1 14
9 14
20 8 5
23 1 19
1
23 8 15
4 5 16 1 18 20 13 5 14 20
20 8 9 19
4 1 25 19
12 15 22 5 12 25
1 20
1 14 4
15 6
23 8 9 3 8
2 5 3 1 21 19 5
23 5 18 5
20 8 5
20 8 5
15 6
15 14 5
15 6
19 5 14 20
20 8 5
3 9 20 25
20 8 5
8 15 21 19 9 14 7
20 15
2 25
20 8 5 18 5
14 1 20 9 15 14 1 12
23 1 9 20
9 19
13 9 12 5 19
6 5 23
20 8 9 19
9 14
15 20 8 5 18
8 15 18 19 5
23 9 20 8
3 15 13 16 1 14 25
1
3 12 9 14 20 15 14
1 14
14 15 20
16 18 9 19 15 14 5 18 19
8 9 19
15 16 5 18 1 20 9 15 14 19
23 5 18 5
10 15 8 14
19 5 18 22 9 3 5
20 15
14 5 5 4 9 14 7
8 15 23
1 14 25 20 8 9 14 7
20 8 5
15 14 5
3 18 15 23 4
4 9 1 12 15 7 21 5
19 15 12 4
20 8 5
19 9 14 3 5
9 20 19
19 1 25 9 14 7
9 14
23 8 15
8 9 19
9 14 22 5 19 20 13 5 14 20
1 8 5 1 4
1 14 4
8 5 12 16
20 8 5
9 14
15 6
23 15 18 12 4
15 6
20 15
22 5 18 25
20 8 5 25
8 1 19
1 14 4
9 19 19 21 5 4
20 8 5 18 5
19 20 15 18 5 19
1 14 1 12 25 19 20 19
20 15
20 8 5 18 5
10 5 18 19 5 25
20 8 5
7 15 22 5 18 14 13 5 14 20
23 15 18 12 4
1 7 1 9 14 19 20
23 1 19
15 6
1 19 19 5 20 19
3 15 18 18 21 16 20 9 15 14
16 1 18 11
9 20
23 15 13 5 14
1
3 15 14 6 5 18 5 14 3 5
20 15
20 8 5
2 25
20 8 5
1 6 20 5 18
9 14
8 1 22 5
20 8 5
1 14 4
20 8 5
6 18 15 13
9 14
23 15 18 11 19
15 16 5 18 1 20 15 18 19
1 14 4
8 1 12 6
8 9 19 20 15 18 25
23 8 15
5 14 3 15 21 18 1 7 9 14 7
14 5 24 20
20 8 1 20
20 8 15 21 7 8 20
6 15 18 13 1 12
18 9 7 8 20
20 8 5
18 5 3 5 9 22 9 14 7
23 9 20 8 9 14
20 8 5
20 8 5
20 18 1 4 5
19 8 1 22 5
20 8 5
1 14 4
13 9 7 8 20
20 8 5
2 21 20
15 14 5
16 5 18 19 15 14
6 15 18
6 15 21 18 20 8
1 14 4
20 8 5
23 15 21 12 4
1
6 15 18
2 18 15 14 24
20 8 5
23 18 15 20 5
9 14
20 15
15 14 12 25
19 1 25
16 18 15 4 21 3 20 19
15 6
3 1 18 4 5 14 1 19
1 19 11 5 4
20 8 5
19 8 5
20 8 5 25
1 19
20 8 5
20 18 25 9 14 7
20 8 5
13 1 11 5
4 9 6 6 9 3 21 12 20
2 18 15 20 8 5 18
9 14
3 1 14
20 8 5
20 8 1 20
23 9 12 12
20 8 5
9 14
15 6
2 18 15 14 24
1 20
1 14 4
9 14 3 12 21 4 9 14 7
1 19 19 21 18 5 4
1 14 4
3 12 9 14 20 15 14
16 1 18 20 14 5 18 19
20 8 1 20
20 15
8 5 18 5
9 14
23 15 21 12 4
23 15 18 20 8
13 9 12 12 9 15 14
20 8 5
8 9 19
23 1 20 5 18
20 8 1 20
9 20
23 8 9 3 8
2 5
23 1 19 8 9 14 7 20 15 14
3 15 13 13 21 14 9 3 1 20 5
20 18 21 3 11
5 4 7 5
20 8 5
1 2 15 21 20
7 5 18 13 1 14 25
15 6
1 14
19 15 13 5
6 15 18
20 8 5
2 5 3 1 21 19 5
8 9 19
20 8 5
10 21 19 20
20 8 5
20 8 5
1
20 8 5
1 14 4
23 5 12 3 15 13 5
1 14 4
20 15
1 14 4
4 15 14 5
15 16 5 14
23 1 19
20 8 5
20 15
15 6
1 14 4
8 9 7 8
7 9 22 5
20 8 5 9 18
6 15 18
19 8 5
20 8 5 9 18
13 15 19 20
7 1 13 5
15 6
6 15 18 23 1 18 4
23 1 20 5 18
20 8 5
13 1 25
2 5 3 1 21 19 5
3 9 20 25
16 15 23 5 18
23 18 9 20 20 5 14
20 21 5 19 4 1 25
1 14 4
9 14 6 15 18 13 1 20 9 15 14
20 8 5
23 18 15 20 5
3 15 13 13 21 14 9 20 25
1
15 6
23 15 21 12 4
8 9 19 20 15 18 25
2 18 9 20 9 19 8
22 15 20 5
23 1 19
15 6
9 14
20 8 5
15 6
8 9 19 20 15 18 25
6 15 18
12 5 1 4 5 18
13 15 19 20
20 8 5
25 15 18 11
15 6
15 6
7 5 20
15 6
20 8 5
16 18 9 15 18 9 20 25
20 15
20 5 1 3 8 5 18 19
1
3 1 13 5
2 9 20
20 15
1 7 1 9 14 19 20
1 7 5 14 3 25
23 9 20 8
23 18 9 20 5 19
19 1 9 4
20 8 5
25 15 21
1
18 21 14 19
18 15 14 1 12 4
14 15 20
1 14 4
20 8 5
19 9 14 3 5
20 8 5
2 25
12 5 20 20 5 18
20 8 5
1 7 5 14 3 25
2 21 20
20 8 5
19 5 18 9 15 21 19
15 6
1 12 20 8 15 21 7 8
20 8 5
23 9 12 12
20 8 5
8 1 22 5
23 8 9 20 5
19 15 13 5 20 8 9 14 7
15 6
12 1 3 11
14 9 7 8 20
3 15 14 20 1 9 14 9 14 7
7 18 1 3 5
20 8 5 25
15 6
20 8 5
2 5
16 1 14 5 12
20 8 5
16 1 25
9 19
9 14
1 14 4
1 2 15 21 20
8 1 22 5
19 1 9 4
20 8 5
4 1 25 19
1 14 4
20 8 1 20
2 21 20
12 1 21 18 1
2 15 15 11
1 14 4
23 15 21 12 4
13 15 14 4 1 25
3 15 22 5 18
8 9 13
1 14 4
20 8 5
1 14 4
16 15 21 14 4 19
13 9 12 12 9 15 14 19
1 3 20 21 1 12 12 25
9 20
3 12 5 1 18
20 8 5
9 14
20 8 5
23 15 13 5 14
20 8 5 18 5
7 18 15 21 16
4 5 1 20 8
13 1 11 5
20 8 5
20 15
23 15 21 12 4
15 6
15 6
19 8 5
20 8 5 9 18
6 15 18
8 1 19
18 9 7 8 20
1 14 4
20 8 5
16 5 18 3 5 14 20
6 21 14 4 19
20 15
9 14
14 5 24 20
21 14 6 15 18 20 21 14 1 20 5
15 6 6 9 3 9 1 12 19
8 1 16 16 5 14
23 15 13 5 14
2 15 25 19
15 6
23 9 20 8
20 8 5
20 18 21 5
3 15 21 12 4
10 5 18 19 5 25
2 25
20 15
19 1 9 4
20 15
1 12 19 15
23 8 1 20
2 21 20
19 1 9 4
20 15 15
6 15 18 13 5 18
15 6
9 14
8 1 22 5
20 8 1 20
20 8 5
19 21 13 13 5 18
15 20 8 5 18
15 6
15 6
8 1 19
8 5
23 8 15
23 8 5 14
8 1 19
1 14 4
1
15 20 8 5 18
20 9 13 5
19 1 9 4
6 15 18
15 21 20
18 5 6 5 18 18 1 12
20 8 5
1 14 4
20 1 11 5
15 6
16 15 12 9 3 25
12 9 13 9 20 5 4
15 6
20 15
13 15 18 5
23 15 21 12 4
20 8 5
6 18 1 14 11 12 25
20 8 1 20
1 14 4
1 19
18 21 19 19 9 1 14 19
2 5 20 23 5 5 14
20 8 5
20 8 5
20 8 5
25 15 21
15 6
13 1 25
20 8 5
6 5 1 20 21 18 5
20 8 1 20
3 15 14 22 9 3 20 5 4
19 5 5
20 15
13 15 22 9 14 7
4 5 2 1 20 5
15 6
6 18 15 13
1 14 4
13 15 22 9 14 7
20 8 5
9 14
20 8 5
20 8 5
19 20 15 18 5
23 15 18 11
2 12 1 3 11
18 5 3 1 12 12 5 4
20 15
5 1 3 8
18 5 4 21 3 5
20 8 5
20 1 24 9 14 7
20 8 5
20 8 5
13 15 18 5
1 12 18 5 1 4 25
9 14
2 25
8 5 18 5
20 8 5
23 1 19
20 8 5
14 15 20
20 8 5
2 25
8 5
19 5 20 20 9 14 7
9 14
20 15
9 14
9 14
5 14 22 9 19 9 15 14 19
20 8 5
21 14 12 9 11 5
6 18 9 4 1 25
7 1 18 4 5 14
1 16 16 12 5
23 1 14 20
6 18 9 4 1 25
20 23 15
12 1 3 11
9 14
9 14
20 8 1 20
8 9 19
20 8 5
20 8 5
2 21 20
1 14 4
15 6
20 8 5
5 22 5 14
15 14 12 25
20 8 1 20
23 1 19
15 21 20
20 15
23 5 5 11
20 8 5
4 5 16 1 18 20 13 5 14 20
20 8 5
23 9 12 12
8 9 13
15 22 5 18
4 21 5
1 14
2 15 20 8
1
1 14 4
15 21 20
20 15 15
15 6
23 1 19
19 8 15 21 12 4
20 8 5
1
1 14 4
3 8 1 9 18 13 1 14
9 14 20 5 18 5 19 20 19
23 15 13 5 14
20 15
15 6
1
15 6
15 6
8 5 12 4
9 14
1 12 13 15 19 20
20 8 1 20
20 8 5
9 14
1 2 15 21 20
19 9 13 16 19 15 14
2 5
3 18 9 13 5
20 15
20 8 5
8 5
13 9 24
9 14
20 8 5
20 8 5 18 5
2 21 20
1 14 4
2 21 20
15 21 20
19 5 14 20
1 3 3 15 21 14 20
3 1 14
23 15 18 12 4
4 9 4
20 15
20 8 5
16 18 15 13 9 19 9 14 7
1 14 4
3 8 9 5 6
20 15
1 14 4
9 14
20 8 1 20
19 5 22 5 18 5
1 19 11 5 4
20 8 18 15 21 7 8
20 15
19 3 15 18 5
15 6
6 18 9 4 1 25
21 14 9 15 14
20 8 5
20 8 15 21 19 1 14 4 19
1 20
1 14 4
9 14
19 1 25
20 8 9 19
15 6
23 1 19
16 5 18 3 5 14 20
1 20
19 20 1 20 5
5 24 1 3 20 12 25
1 20
1 19
15 6
20 15
23 8 15
9 14
9 20 19
20 8 1 20
23 15 18 11
16 18 5 19 5 14 3 5
20 8 5
9 12 12 9 14 15 9 19
16 18 9 14 3 9 16 12 5 19
15 6
19 1 9 4
15 6
19 5 1 19 15 14
23 9 12 12
15 6
7 5 20
8 15 21 19 5
20 8 5
2 18 9 14 7
15 21 18
13 9 12 12 9 15 14
19 5 1 19 15 14
23 9 14 20 5 18
20 15
8 1 19
9 14
9 14
19 15 21 18 3 5
15 6
2 9 7
20 5 12 12 19
23 9 20 8
1 14 4
14 15 20
20 8 5
3 15 13 16 5 20 9 20 9 15 14
19 5 1 20 19
9 14
14 5 23
4 15 5 19
8 9 19
20 8 5
1 14 4
23 9 12 12
20 23 15
1
20 8 5
23 8 1 20
20 8 5 25
1 4 4 9 14 7
1 14 4
13 1 20 5 18 9 1 12
8 9 13
5 22 5 14 20 21 1 12 12 25
2 12 1 3 11
23 18 9 20 20 5 14
8 1 22 5
8 15 21 19 5
1 14 4
20 8 5
1
6 15 18 5 9 7 14
9 14
15 21 20 19 9 4 5
9 14
23 1 9 20
20 8 5
12 15 22 5
8 5
3 12 1 9 13
7 5 20
2 21 20
13 21 18 4 5 18
23 15 21 12 4
15 6
6 15 18
20 8 1 20
15 6
12 15 15 11 5 4
2 25
15 6
20 23 15
20 8 5
15 6
1 19
3 15 21 12 4
1 14 4
1 14 4
20 8 5
4 9 6 6 5 18 5 14 20
16 15 23 5 18 19
3 1 18 5
15 20 8 5 18
8 9 19
14 1 20 9 15 14 1 12
19 8 5
3 1 13 16 1 9 7 14
13 9 3 8 1 5 12
8 1 22 5
8 9 19
23 8 15
8 15 19 16 9 20 1 12 19
3 1 14
2 5
1 7 5 14 3 25
13 15 18 5
3 15 14 7 18 5 19 19
2 21 9 12 4 9 14 7
9 20
8 15 12 4 5 18 19
23 18 15 20 5
20 8 5 9 18
13 5 1 14
5 22 5 14
1 14 4
20 8 5
6 21 14 4 19
1 2 15 21 20
1 14 4
19 1 9 4
16 1 18 20 14 5 18 19
20 8 5
15 6
8 9 19
4 5 16 1 18 20 13 5 14 20
9 19
20 8 5
23 9 12 12
16 5 18 3 5 14 20
15 21 18
14 1 20 9 15 14 1 12
20 8 5
23 1 20 5 18
19 20 21 4 9 5 19
12 1 19 20
12 5 20
8 9 19
20 15 12 4
3 18 9 20 9 3 19
5 3 15 14 15 13 9 3
20 9 13 5
7 5 20
12 1 19 20
20 8 5 19 5
1 14 4
19 1 9 4
7 5 18 13 1 14 19
17 21 15 20 5 4
20 15
14 5 5 4
23 8 5 14
9 19
1 14 4
2 1 9 12 5 25
1 14 4
1 7 18 5 5
19 15 18 20
16 15 16 21 12 1 18
2 21 19 8
2 21 20
19 1 9 4
3 15 13 16 5 20 9 20 9 15 14
20 8 5
13 1 14
1 20
23 1 19
20 8 1 20
1 4 4 5 4
23 15 15 4 5 14
4 5 1 20 8
1 14 4
19 5 14 1 20 15 18
12 15 22 5
1 2 15 21 20
19 15 13 5 20 8 9 14 7
23 1 19
20 8 21 18 19 4 1 25
2 21 20
15 6
18 5 16 15 18 20 19
9 14
6 18 9 5 14 4
20 8 5 25
20 8 5
23 8 15 19 5
20 15
20 8 5
9 20
4 5 19 20 18 15 25
6 18 15 13
7 1 13 5
19 8 15 23
2 9 12 12
18 21 12 5
9 14
1 14 4
23 8 1 20
6 15 18
20 9 13 5
1 12 19 15
4 5 20 1 9 12 19
2 1 12 1 14 3 5
20 8 5 25
8 9 19
20 8 5
9 20 19
14 15 20
3 8 9 5 6
19 20 1 20 5
1 14 4
8 1 19
20 8 5
20 8 5
14 15 20
1 12 15 14 7
9 14
8 9 13
1
15 6
20 15
1 14 4
20 8 18 15 21 7 8
9 20 19
23 8 15
20 8 5
8 9 19
2 1 20 20 9 14 7
3 15 21 14 20 18 25
1 14 4
23 1 19 8 9 14 7 20 15 14
19 8 5
18 9 19 9 14 7
9 14
1 14 4
3 12 9 14 20 15 14
9 19
20 8 5
15 6
6 15 18
3 12 15 19 5 4
3 12 5 1 18 12 25
2 5 3 1 21 19 5
1 14 1 12 25 19 20 19
9 19
13 9 12 12 9 15 14
20 8 5
20 15
3 15 20 20 15 14
8 1 22 5
6 15 18 23 1 18 4
23 15 21 12 4
20 15
5 13 16 12 15 25 5 5 19
15 6
20 5 19 20
23 5 2
1 14 4
15 20 8 5 18
1 14 4
8 9 19
20 8 5
23 8 15
20 8 1 20
15 6
8 1 22 5
23 8 5 14
10 15 9 14 20
7 15 22 5 18 14 13 5 14 20 19
20 8 1 20
19 20 21 4 5 14 20
20 8 5
23 8 15
3 1 13 16 2 5 12 12
20 8 5
18 5 6 21 19 5 4
25 15 21
9 14
4 9 6 6 5 18 5 14 20
19 20 9 12 12
1 14 4
23 15 18 12 4
14 15 20
7 15 22 5 18 14 13 5 14 20
15 6 6 9 3 9 1 12 19
9 14
19 1 25
19 1 9 4
9 14 22 5 19 20 9 7 1 20 15 18 19
13 1 20 20 5 18
9 19
9 14
14 15 20
6 5 4 5 18 1 12
23 9 20 8
19 20 15 18 5 19
12 1 19 20
8 1 22 5
9 14
9 14 3 8 5 19
15 14 5
15 16 16 15 14 5 14 20 19
19 1 13 5
9 14 4 9 22 9 4 21 1 12
2 21 20
8 5 12 16
19 11 9 14 14 25
20 8 5
20 23 15
19 3 8 15 15 12
20 18 1 9 14
9 14
20 15
3 12 9 14 20 15 14
6 9 22 5
7 9 22 5 14
20 8 5
6 15 18
2 21 20
3 8 1 12 12 5 14 7 5 4
20 15
20 8 5
8 1 4
20 8 5 9 18
25 15 21
20 5 24 1 19
23 9 20 8
25 15 21
7 18 15 21 16
15 6
2 21 19 9 14 5 19 19
23 15 21 12 4
16 18 9 3 5
23 8 9 3 8
1 14 4
25 15 21 14 7
20 15 15 11
23 9 20 8
9 14
15 6
20 8 5
19 8 5
6 15 18
19 9 13 16 12 5
20 8 5
20 8 1 20
1 12 18 5 1 4 25
20 8 15 21 7 8 20
8 5
2 5
21 14 9 15 14
20 8 5
22 9 3 20 9 13 19
2 5 8 9 14 4
6 15 18
3 1 14
8 9 7 8
20 8 5
3 8 9 12 4
8 1 22 5
8 1 19
20 8 1 20
8 1 22 5
23 9 20 8
12 15 21 9 19
20 8 5 9 18
1 14 4
20 8 5
2 15 20 8
23 9 20 8
9 19
9 14
16 18 5 19 5 14 20
20 8 5
7 1 13 5
15 6
23 8 5 14
20 15
1 14 4
1 20
23 8 1 20
15 6
9 19
8 1 19
20 8 1 20
23 8 5 14
8 1 19
9 14
2 15 20 8
14 15 20
3 1 14 14 15 20
5 25 5 19
20 8 5
16 21 20
20 8 5
13 9 19 20 1 11 5
2 5 12 9 5 22 5 4
20 15
8 5 12 16
15 14 12 25
20 8 5
9 14
19 15 13 5
20 15
9 20 19
3 18 9 20 9 3 19
20 9 13 5
15 6
1
20 1 11 5
23 1 19
1 14 4
4 15 26 5 14
8 1 19
8 1 19
23 9 12 12
19 20 15 18 25
8 1 19
14 5 22 5 18 20 8 5 12 5 19 19
19 1 14 20 1
1 3 20 21 1 12 12 25
20 23 15
15 6
1 2 15 21 20
19 1 9 4
19 9 14 3 5
23 8 9 3 8
3 8 9 12 4
20 8 1 20
20 8 5
9 20
13 1 11 5
16 18 5 22 5 14 20 19
9 19 19 21 5 4
6 15 18
3 8 9 5 6
1 20
15 18 7 1 14 9 26 1 20 9 15 14 19
19 1 25 19
8 9 19
3 8 1 9 18 13 1 14
16 1 18 11 9 14 7
19 5 22 5 18 1 12
20 15
15 6
12 15 19 20
9 14 4 9 22 9 4 21 1 12
1 14 4
23 8 1 20
20 8 5
20 8 5
16 15 16 21 12 1 18
1 12 23 1 25 19
2 21 20 20 5 18
8 15 21 19 5
12 5 1 7 21 5
23 1 19
8 1 18 4
6 18 9 5 14 4
23 9 20 8
20 15
1
2 1 3 11 7 18 15 21 14 4 19
4 5 16 1 18 20 13 5 14 20
19 5 5
15 6 6 9 3 9 1 12 19
15 6
25 15 21
13 15 18 5
19 21 18 5
19 20 5 16 19
15 6
20 8 5
18 5 12 1 20 9 22 5 12 25
25 15 21
6 15 18
8 1 22 5
9 14
7 5 14 5 18 1 12
15 3 20 15 2 5 18
20 23 15
23 9 20 8
23 1 19
23 8 15
23 1 19
15 6
19 1 9 4
20 8 1 20
19 15 13 5
20 15
9 14
1
19 1 9 4
6 15 18
20 8 5
19 5 5
15 6
8 1 19
6 15 18
20 8 5
20 15
1 12 19 15
16 1 18 20 14 5 18 19 8 9 16
8 1 19
20 8 5
23 9 20 8
20 8 1 20
19 16 5 3 9 1 12 9 26 5 19
1 14 4
16 18 15 16 15 19 1 12 19
19 21 18 5
1 16 16 18 15 22 1 12
19 5 5 9 14 7
1 14 4
19 1 25
20 8 5
25 15 21 14 7
15 6
25 15 21
19 1 13 16 12 5
20 8 9 14 7 19
19 5 1 18 3 8
8 1 22 5
19 8 15 21 12 4
15 6
11 14 15 23 14
11 14 15 23 14
1 14 25 15 14 5
20 15
20 8 5
20 8 1 20
7 5 20
2 5
3 1 14
19 1 9 4
19 15 21 18 3 5 19
1 9 4 19
23 5 18 5
6 15 18
18 15 12 5
20 15
20 8 1 20
9 14
9 14
1
20 8 5 25
10 21 19 20
15 6
2 1 4 12 25
18 9 7 8 20
8 9 19
20 15
9 14
14 5 23 19
23 8 15
23 5 12 12
15 6
19 8 15 23
14 5 1 18 12 25
6 15 18
9 20
1 14 4
18 5 16 21 2 12 9 3 1 14
20 8 5
6 15 18
23 15 21 12 4
19 15 13 5 20 8 9 14 7
20 8 5
6 1 19 20 5 18
7 5 20 19
1 14 4
14 5 23 19 16 1 16 5 18
1 19 11 5 4
20 8 5
20 8 5
3 15 13 6 15 18 20 1 2 12 5
19 15 13 5 20 8 9 14 7
19 8 15 21 12 4
15 6
20 8 5
12 1 19 20
20 8 1 20
8 21 19 2 1 14 4
20 8 5 25
20 15
3 15 21 12 4
18 15 12 5
1 20 12 1 14 20 1
20 15
20 8 15 21 7 8
1 7 5 14 3 25
15 6
3 1 14
9 14
20 8 5
15 6
20 18 21 20 8
15 6
16 15 12 9 3 5
23 9 4 5 12 25
23 8 1 20
23 1 19
6 15 18
19 15 21 7 8 20
20 15
20 8 5
20 15 12 4
1 20
5 19 20 9 13 1 20 5 4
1 14 4
1 13 15 14 7
15 6
2 25
20 8 5
25 15 21
9 12 12 9 14 15 9 19
1 20
4 1 20 5 19
20 8 5
2 25
3 15 14 19 9 4 5 18
16 12 1 25 5 18 19
18 15 15 13
19 8 5
20 15
20 8 1 20
6 18 15 13
1 14 4
15 6
8 5
5 24 16 5 18 20 19
14 5 23 19 16 1 16 5 18
3 15 21 12 4
19 8 5
9 14
14 1 20 9 15 14 1 12
3 15 14 3 5 18 14
2 5
20 15
10 5 18 18 25
8 9 19 20 15 18 25
2 25
3 15 13 16 1 14 25
19 8 15 21 12 4
19 20 1 20 5
20 8 5
20 8 5
1
9 14
8 1 4
6 5 23
23 8 15
1 14 4
1 19 11 5 4
6 15 21 14 4 9 14 7
9 14
20 8 5
15 14 5
6 15 18
5 14 4
23 8 15
19 3 8 15 15 12
3 9 18 3 21 13 19 20 1 14 3 5 19
2 25
23 15 21 12 4
20 15 15 11
8 5
13 5 20 19
1 14 25 13 15 18 5
20 15
20 5 12 5 22 9 19 9 15 14
19 8 15 21 12 4
3 15 14 20 5 19 20
23 1 19
20 8 5 18 5
15 6
3 1 12 12 5 4
12 1 19 20
18 5 16 15 18 20 5 4
3 12 5 1 18 12 25
20 15
20 8 5
20 8 5
10 21 19 20
19 5 14 9 15 18
2 21 9 12 4 9 14 7
6 18 1 14 3 8 9 19 5
20 8 5
5 18 9 3
10 21 19 20
20 8 5 25
20 15
21 19 9 14 7
23 8 9 20 5
2 5
20 8 5
6 15 18
19 12 9 7 8 20 12 25
20 8 5 18 5
9 14
20 15
21 14 20 9 12
1 14 4
23 15 21 12 4
15 21 20
1 2 15 21 20
15 14 12 25
9 14
19 1 25 9 14 7
2 9 12 12
19 20 15 18 25
20 8 5
20 8 5
20 8 5
15 6
14 15 20
15 6
23 5 12 12
19 1 9 4
23 15 18 11
23 9 12 12
15 6
1
9 14 22 5 19 20 13 5 14 20 19
12 5 20
23 1 19
14 15 20
12 1 19 20
1 20
9 14
6 18 15 13
3 12 1 19 19
6 18 15 13
20 8 5
19 20 9 12 12
1 20
10 15 8 14
9 14 3 12 21 4 9 14 7
3 1 14 1 4 1
6 12 5 4
20 8 5
15 6
19 1 9 4
12 1 19 20
13 15 19 20
15 6
23 8 15
20 8 5
20 15
18 5 6 21 7 5 5 19
14 9 3 11
5 14 15 21 7 8
14 5 24 20
20 8 5 18 5
4 15 5 19
5 6 6 5 3 20 19
20 15
3 15 21 12 4
8 1 22 5
2 25
20 15
23 1 19
21 14 4 5 18
20 15
1
13 1 18 11 5 20 9 14 7
19 1 9 4
23 1 19
11 9 14 4
15 6
20 8 5
19 5 22 5 18 1 12
4 9 6 6 5 18 5 14 3 5
3 15 13 16 5 20 9 20 9 15 14
1 14 4
20 8 5
16 12 1 14 14 5 4
15 6
5 24 16 5 3 20 5 4
3 15 1 3 8
23 15 18 11
3 15 21 12 4
6 5 4 5 18 1 12
20 8 5
23 15 21 12 4
9 14 4 9 1 14
1 14 4
20 8 5
13 15 18 5
16 5 18 3 5 14 20
2 18 15 23 14
19 15 13 5
20 5 3 8 14 9 17 21 5
8 15 13 5 19
1
5 24 1 3 20 12 25
8 1 19
20 15
8 1 19
1 14 25 15 14 5
19 20 15 18 5 19
1 20
2 25
19 3 15 18 5 4
1 14 4
1 14 4
13 15 19 20
20 8 5
19 1 9 4
15 6
7 15 22 5 18 14 13 5 14 20
6 15 18
4 5 20 1 9 12 19
18 5 3 5 14 20
1
16 12 1 25 5 18 19
1 14 4
2 9 7
3 15 13 13 21 14 9 20 25
6 18 9 4 1 25
1
1
9 14 3 12 21 4 9 14 7
18 5 19 15 12 21 20 9 15 14
23 8 15 12 5
2 5 7 1 14
16 15 20 5 14 20 9 1 12 12 25
23 8 1 20
20 9 13 5
4 5 1 4 12 9 14 5
18 21 12 5
20 8 5
20 8 5
20 8 5
15 6 6 9 3 9 1 12 19
20 8 5
8 1 19
20 8 5
9 14
20 8 5 25
1
23 8 15 19 5
8 15 23
19 8 5
8 5 12 16
25 15 21
25 15 21
23 9 12 12
9 14
1 20
23 1 19
14 5 23 19
20 8 5
23 1 14 20
1 20
1 14 4
20 8 5
8 1 19
3 21 18 18 5 14 20
23 1 18 14 9 14 7
12 1 19 20
18 15 13 1 18 9 15
20 8 5
20 8 5
9 19
20 8 5
9 14
23 5 18 5
20 15
3 1 21 19 5 19
8 9 19
3 15 21 12 4
1 14 4
23 9 20 8
8 1 22 5
1 3 20 21 1 12 12 25
9 14
19 1 9 4
20 15
20 18 25 9 14 7
23 8 9 20 5
19 5 18 22 5 4
20 8 5
2 25
20 15
15 6 6 9 3 5
10 21 19 20
23 9 20 8
3 15 1 3 8
2 9 7
19 1 25 19
14 1 20 9 15 14
20 8 5
9 19
10 1 13 5 19
20 8 5
20 18 9 1 12
20 8 5
19 5 22 5 18 1 12
1 18 15 21 14 4
8 1 22 5
6 15 18
3 8 9 14 1
20 8 5
20 8 5 18 5
8 9 19
20 8 5 25
1 3 20 21 1 12 12 25
1 14 4
13 15 18 5
2 21 9 12 4 9 14 7
4 5 16 1 18 20 13 5 14 20
5 22 5 14
1
5 22 9 4 5 14 3 5
5 21 18 15 16 5
19 1 9 4
9 14
18 5 19 20
8 1 12 6
20 8 1 20
20 8 5 18 5
15 6
2 25
9 19
23 1 19
13 1 25
20 8 5
19 8 15 15 20 9 14 7
1 14 4
2 9 4 4 9 14 7
8 5
23 1 19
1 19
15 6
20 15
8 1 22 5
20 8 5
8 9 19
2 5 7 9 14 14 9 14 7
15 6
20 8 1 20
20 8 5
20 8 5
23 9 12 12
13 1 4 5
3 15 15 16 5 18 1 20 9 15 14
23 18 9 20 20 5 14
2 25
20 8 5
1 18 15 21 14 4
4 5 16 1 18 20 13 5 14 20
20 8 5
20 9 13 5
20 15
13 15 18 5
20 8 5
20 8 5
3 15 13 6 15 18 20
2 21 20
20 15
19 1 9 4
20 8 5 9 18
8 1 19
1
20 8 5
25 15 21
20 8 9 14 7 19
3 15 21 12 4
6 15 18
1 14 4
23 9 20 8
19 8 5
8 5 18 5
1 14 4
20 8 5 18 5
20 1 11 9 14 7
23 1 19
19 20 9 12 12
20 8 1 20
9 14
6 15 18
20 8 5
1 14 4
2 5 20 23 5 5 14
16 5 18 19 15 14
1 14 4
21 14 20 9 12
9 14
20 8 1 20
3 1 14
15 6
3 18 5 1 20 9 14 7
8 15 23 5 22 5 18
3 1 12 12 5 4
14 15 18 20 8 5 18 14
3 15 21 12 4
9 14
20 8 5
2 15 20 8
15 6
12 9 19 20 5 4
23 9 12 12
1 14 4
15 6
1 14 4
20 8 1 20
1 14 4
3 8 18 9 19 20 15 16 8 5 18
1 14
6 18 1 14 11
19 5 14 1 20 15 18
20 23 15
23 1 19
8 1 22 5
20 8 5
5 22 5 14
16 12 1 25 5 18 19
23 15 21 12 4
15 6
14 5 24 20
19 1 9 4
15 6
23 8 1 20
23 9 20 8
1 19
25 15 21
16 15 23 5 18
20 8 5
14 1 20 9 15 14
12 5 22 5 12
18 1 14 7 5 18 19
8 1 22 5
6 15 18
20 8 5
20 8 21 19
1
20 8 5
20 8 5 25
8 1 22 9 14 7
3 15 14 6 5 18 5 14 3 5
20 8 5
2 21 20
2 21 20
13 15 18 5
20 8 5 25
14 5 24 20
9 14
20 8 5
1 19
13 5 13 2 5 18
20 8 1 20
3 9 20 25
1 14 4
3 12 9 14 20 15 14
9 19
6 21 20 21 18 5
2 5 5 14
23 9 12 12
5 13 16 12 15 25 5 5 19
9 20 19
1
20 8 5
14 5 5 4
6 9 5 12 4 19
1
19 1 9 4
2 5 3 1 21 19 5
4 5 16 1 18 20 13 5 14 20
20 15
12 1 19 20
23 8 9 3 8
20 8 5
15 6
6 18 15 13
19 3 5 14 5
20 8 5
15 6
3 15 21 12 4
8 9 19
3 1 14 14 15 20
20 8 5
9 14
1 14 4
1 14 4
3 15 18 18 21 16 20 9 15 14
23 9 20 8
4 9 4
20 1 11 5
23 9 12 12
20 21 18 14 5 4
18 15 15 13 19
1
1 14 4
19 1 25 19
20 8 1 20
20 8 5
12 15 23 5 18
1 12 13 15 19 20
20 8 5
23 9 20 8
20 15
10 5 18 19 5 25
1 19
23 9 20 8
2 5
23 9 20 8
19 8 5
23 15 21 12 4
19 15 18 20
20 8 5
23 8 9 3 8
13 9 4 4 12 5
1
1
9 14
1
1 14
23 1 19
8 5 12 16
15 6
1 14 4
9 14
15 6
6 15 18
23 1 19
19 20 15 3 11
6 15 18
1 14 1 12 25 19 20 19
20 8 5
14 5 23 19 16 1 16 5 18
13 9 12 5 19
20 15
12 5 7 9 19 12 1 20 9 15 14
4 1 25 19
20 8 5
15 6
20 8 1 20
20 23 15
8 9 19
20 8 5
20 8 5
8 9 19
1 14 4
19 15 13 5 20 8 9 14 7
3 1 19 5
23 9 20 8
20 8 5
2 15 21 20 18 15 19
15 21 18
4 9 19 16 21 20 5
20 8 1 20
20 8 5
23 9 20 8
1 7 1 9 14 19 20
4 1 25 19
20 8 5 18 5
20 8 5
15 21 18
19 9 7 14 9 6 9 3 1 14 20
20 8 5
20 8 5
9 14
20 8 5
20 8 5
8 1 22 5
20 15
20 9 13 5
9 20 1 12 9 1 14
15 6
19 1 9 4
7 1 18 4 5 14
3 1 18 5
3 9 20 25
9 14
20 8 5 18 5
20 8 5 25
2 5 20 23 5 5 14
20 15
9 14
19 1 9 4
2 9 7
1 14 4
20 8 1 20
15 22 5 18
23 9 20 8
8 1 22 5
20 8 5
4 18 9 22 5
23 15 21 12 4
18 5 19 5 1 18 3 8
18 1 20 5
6 1 3 5 19
15 22 5 18
1
13 1 4 5
6 15 18
1 14 4
23 1 19
20 8 5 9 18
16 15 12 9 3 5
1 14 4
13 9 4 4 12 5
20 8 5
20 8 5 25
20 8 5
20 1 12 11
9 14 20 5 18 14 1 20 9 15 14 1 12
7 5 20
20 8 5
7 5 18 13 1 14 25
1 14 4
18 9 7 8 20
1 6 18 9 3 1 14
20 15
20 9 13 5
15 6
1 14 4
6 15 18
6 15 18
6 1 20 8 5 18
7 18 5 5 14
23 8 5 18 5 1 2 15 21 20 19
20 8 9 19
18 5 3 1 12 12 5 4
9 14
20 8 5
1 14 4
20 8 5
1 14 4
20 8 5 19 5
19 9 24 20 8
1
19 20 1 20 5 19
7 15 9 14 7
1
23 8 1 20
23 15 21 12 4
1 14 4
15 21 18
9 14
9 20
15 14 5
9 20
9 20 19
19 1 9 4
15 6
8 1 22 5
9 20
5 3 15 14 15 13 9 3
20 8 5
15 6
19 8 15 16
3 15 13 13 9 19 19 9 15 14
1 14 4
19 21 6 6 5 18 5 4
19 15 14
20 8 5
23 1 19
1 14 4
18 1 9 14
19 15 13 5
8 9 19
19 20 1 20 5 19
22 15 20 5 19
1 14 4
20 8 5
20 8 18 15 21 7 8
2 1 19 9 19
1
20 8 5
8 5
20 8 5
7 15 22 5 18 14 15 18
20 8 9 19
19 1 9 4
15 6
23 8 5 14
1 12 19 15
2 21 20
20 8 1 20
9 14
19 21 3 8
5 13 16 12 15 25 5 5 19
8 9 19
20 8 5
1 14 4
1
20 9 13 5
20 8 5
8 15 21 19 5
10 21 14 9 15 18
15 14 5
1 14 4
9 19
20 8 1 20
10 15 8 14
1 4 22 9 19 5 18 19
20 15
2 5 3 1 21 19 5
9 14
23 8 15
18 5 16 18 5 19 5 14 20 1 20 9 22 5
6 9 14 9 19 8
4 9 14 14 5 18
9 20 19
1 19 11 5 4
19 1 9 4
1 14 4
4 15 4 7 5 18 19
20 8 5
2 5 3 1 21 19 5
19 3 8 15 15 12
15 6
23 8 15
15 6
18 21 14 19
15 6
20 8 1 20
20 8 5
12 9 14 5 21 16
1 14 4
2 15 20 8
8 5
19 8 15 21 12 4
8 5 1 4
15 6
5 21 18 15 16 5 1 14
6 15 18
4 5 1 20 8
1 14 4
9 14
20 18 1 14
23 15 14
15 6
20 8 5
20 8 5
1 14 4
20 8 5
9 14
15 6
9 14
20 8 5 25
13 15 18 5
1 4 4 5 4
1 2 15 21 20
9 13 16 18 15 16 5 18
20 8 5
9 14
6 15 18
15 6
20 8 5 25
7 5 20
20 8 5
19 1 9 4
1 14 4
13 1 4 5
16 9 3 11 21 16
3 1 19 5
20 1 11 5
3 15 21 16 12 5
23 15 21 12 4
9 20
20 8 5
6 9 18 13
9 14
20 8 1 20
13 9 12 12 9 15 14
20 8 5
19 15 13 5
19 15 13 5
23 9 20 8
20 8 5
23 1 19
20 8 5
2 21 20
20 8 9 19
20 8 1 20
20 15
9 14
20 8 5
8 1 22 5
1 2 15 21 20
20 8 5
5 24 1 13 16 12 5
1 14 4
3 1 14
15 20 8 5 18
8 5
19 1 9 4
23 15 18 11 9 14 7
18 5 3 5 14 20
3 15 14 20 18 15 12
14 5 7 15 20 9 1 20 5
9 14
19 20 5 16 19
8 15 23
1 20
20 15
20 9 13 5
20 8 5
6 1 18
3 12 9 14 20 15 14
9 14 19 21 18 5 18 19
20 8 5 9 18
6 15 18
1 16 1 18 20
20 8 5
1 20
15 6
8 1 22 5
13 1 18 11 5 20 19
2 1 19 5 2 1 12 12
13 1 4 5
2 21 9 12 4 9 14 7
1 14 4
20 8 9 19
1 14 4
23 9 20 8
20 8 5
3 1 14
2 18 9 20 9 19 8
9 20
20 15
6 15 18
8 15 21 19 5
1 20
19 1 9 4
15 6
2 25
15 6
23 9 12 12 9 1 13
2 15 18 4 5 18
20 8 5
19 9 13 16 12 25
20 8 5
15 6
1 12 15 14 7
23 1 19
6 15 18
15 6
20 8 5
8 1 19
6 15 18
23 9 20 8
20 18 25 9 14 7
19 20 1 20 5
15 6
13 1 14 25
1
6 15 18
14 5 24 20
15 6
23 8 9 3 8
6 9 22 5
1 16 16 5 1 18 5 4
7 15 22 5 18 14 13 5 14 20 19
20 8 5
13 9 3 8 1 5 12
12 1 19 20
15 14 5
23 9 12 12
8 5 18 5
15 6
1 18 18 9 22 5 4
19 1 9 4
8 1 4
20 15
15 20 8 5 18
5 4 7 5
16 12 1 25 5 18 19
1 14 4
13 1 14
20 18 1 9 14 9 14 7
2 1 18 18 5 4
2 25
23 5 18 5
15 6
20 8 5
1 12 20 5 18 14 1 20 9 22 5
9 14
6 5 2 18 21 1 18 25
1 14 4
19 20 9 12 12
23 8 9 3 8
20 8 5
1 20 20 5 13 16 20 9 14 7
2 5 20 23 5 5 14
19 9 13 16 12 25
20 8 5
25 15 18 11
7 18 1 9 14
23 9 20 8
9 14
20 15
6 18 9 5 14 4
15 6
25 15 18 11
19 9 14 3 5
20 8 5
1 6 6 15 18 4
20 8 5
9 20
20 8 5
23 15 18 12 4
20 15
20 8 1 20
2 21 20
4 18 1 6 20 5 4
1 14 4
7 15 9 14 7
6 21 14 4
20 8 5
12 1 18 7 5 12 25
4 5 22 5 12 15 16 13 5 14 20
23 18 9 20 20 5 14
20 8 5 9 18
9 14
16 15 16 21 12 1 18
1
1 14 4
2 1 18 18 25
1 14 4
20 8 5
20 8 5
2 25
4 9 4
13 9 7 8 20
20 8 5
18 21 14
1 14 4
9 14 22 5 19 20 9 7 1 20 15 18 19
1 14 4
20 15
20 8 5
2 5
20 18 1 4 9 14 7
15 6
3 15 13 16 1 14 9 5 19
16 1 18 11
23 9 20 8
15 6
20 15 4 1 25
15 20 8 5 18
20 8 5
20 8 5
20 8 5
12 5 1 19 20
1 14 4
20 8 5
1 12 19 15
20 15
8 1 19
10 15 2
8 9 19
9 19
20 15
14 5 1 18 12 25
6 15 18
3 1 13 5
11 14 15 23 14
18 15 12 5
1 14 4
20 8 5
15 6
22 5 18 25
1 14 4
9 20
20 15
20 8 5
9 14
1 14 25 23 1 25
20 8 5
15 6
20 8 5
1 20
19 1 25 9 14 7
23 8 9 20 5
19 1 9 4
9 19
9 14
2 9 7
9 14
2 1 4
9 14
1
14 15 20
13 7 13
14 5 24 20
3 15 21 12 4
12 5 20
9 20 19
15 6
15 6 6 9 3 5
9 14
1 14 4
15 6
13 1 11 5 19
15 21 18
6 9 18 5
3 12 1 19 19
23 8 5 14
23 9 20 8
20 18 25 9 14 7
20 8 9 14 7 19
1 14
3 8 9 12 4
1 14 4
1
15 14 5
23 8 15
20 15
3 12 5 1 18 12 25
1
1 14
13 9 24
19 1 25
4 1 12 25
9 14
13 9 12 12 9 15 14
23 8 15
19 3 15 20 20
14 15 20
2 1 4
20 9 13 5
1 14 4
1 14 4
23 8 15
20 8 5
19 5 22 5 14
20 8 5
20 8 5
6 15 18
1 14 4
20 8 1 20
11 9 4 19
13 1 20 5 18 9 1 12
20 8 1 20
20 21 18 14 9 14 7
6 15 18
16 15 22 5 18 20 25
23 1 19
3 15 16 9 5 19
9 14
6 15 18
1 14 4
16 12 1 25 5 18 19
18 5 13 5 13 2 5 18
7 15 9 14 7
20 8 5 25
20 15
23 9 20 8
1 14 4
23 8 1 20
15 6 6 9 3 5
20 8 5
3 15 14 22 9 3 20 5 4
3 15 13 13 21 14 9 20 25
20 8 5 25
19 8 5
19 1 9 4
9 19
3 1 14
15 6
23 8 5 14
20 8 5
20 8 5
8 1 19
19 9 20 5
21 14 20 9 12
8 1 22 5
2 25
14 5 23 19
1 14 4
1
20 8 5
12 1 19 20
23 5 5 11
6 9 22 5
19 1 9 4
1 2 15 21 20
1 2 15 21 20
8 15 21 19 5
20 8 5
18 9 3 8 1 18 4
9 19
23 15 14 4 5 18 6 21 12
6 5 23
15 6
19 1 9 4
20 8 5
2 21 20
20 8 5
15 21 20
20 8 1 20
5 12 19 5
1 14 4
6 15 18
8 1 22 5
20 8 5
20 8 5
15 6
23 9 20 8
9 14
13 5 24 9 3 15
20 8 21 18 19 4 1 25
21 14 4 5 18
19 5 14 9 15 18
9 19
20 8 1 20
3 15 21 12 4
20 8 5
3 8 1 14 7 5 19
2 21 20
15 6
7 5 18 13 1 14 25
1 14 4
1 20
4 9 19 5 1 19 5
13 9 12 12 9 15 14
3 15 22 5 18 9 14 7
15 14 5
20 8 1 20
16 12 1 25 5 18 19
15 6
19 1 9 4
19 1 25
9 14
23 9 12 12 9 1 13
20 8 5
23 5 18 5
3 15 21 12 4
3 15 14 6 21 19 5 4
1 14 4
19 1 9 4
23 5 18 5
1
20 15
23 1 19
15 6
9 14
20 8 1 20
20 15
14 15 20
20 8 21 19
15 6
20 8 5
12 15 14 7 5 18
20 8 5
25 15 21
23 8 15
19 1 13 5
23 9 20 8
19 9 4 5
23 1 19
12 9 20 20 12 5
5 12 19 5
20 8 5
19 21 18 5
15 6
6 15 18
20 8 5
20 8 5 18 5
1 12 20 8 15 21 7 8
23 9 20 8
15 6
20 1 11 9 14 7
6 15 18
20 8 5
20 8 5
1 18 20 9 6 1 3 20 19
20 8 5
25 15 21
20 8 5
15 6
20 8 5
20 8 5
2 21 20
20 8 5
1 14 4
8 15 23
12 15 19 5
8 1 22 5
19 15 12 9 4
20 8 5
6 5 23
20 8 1 20
8 1 22 5
3 1 12 12 5 4
15 14 5
1 20 20 1 3 11
1
20 8 9 19
15 6
1
1 12 3 15 8 15 12 9 19 13
15 6
18 15 15 13
15 6
9 14
20 8 5
8 1 22 5
4 15 5 19
2 5 3 1 21 19 5
23 15 18 12 4
6 15 18
15 14 5
23 8 5 14
21 14 9 15 14
1
20 8 5
4 9 5 4
15 6
15 6 6 9 3 9 1 12 19
20 8 5
2 21 20
5 13 16 12 15 25 5 5 19
1 6 20 5 18
20 15 12 4
19 15 13 5
20 8 5
23 1 19
20 8 5
3 1 14
20 8 5 9 18
5 1 18 14 9 14 7 19
3 12 5 1 18 12 25
19 3 15 18 5
20 8 5
19 15 13 5
6 15 18
20 8 5
20 8 1 20
14 15 20
15 6 6 9 3 9 1 12 19
23 8 5 14
20 8 5
23 8 5 14
9 19
20 8 5
16 1 14 5 12
21 20 9 12 9 20 25
19 5 12 12 5 18 19
6 15 18
13 1 14 25
13 1 4 5
14 15 20
19 16 5 14 20
23 5 18 5
25 15 18 11
1 14 4
20 8 9 19
20 8 5
4 9 4
5 1 3 8
6 9 14 1 12 12 25
1 14 4
9 14
19 5 22 5 18 1 12
2 12 1 3 11
1
9 20 19
1 14 4
1 20
20 8 1 20
19 8 1 18 5
20 8 5
15 6
3 1 12 12 5 4
1
20 8 5
14 5 24 20
20 8 5
20 8 5
2 21 19 9 14 5 19 19 5 19
20 8 1 20
20 8 5
20 8 5
23 1 19
12 15 3 1 12
2 25
15 6
16 21 2 12 9 3 1 20 9 15 14
8 5
15 6
4 1 25 19
18 21 12 9 14 7
1 14 4
3 1 18 5
1
1 2 15 21 20
3 9 20 25
23 9 12 12
15 14 5
9 14
6 15 18
8 5
23 15 18 20 8
19 5 1 20
4 5 3 9 19 9 15 14
1 14 4
2 15 24
16 18 15 3 5 19 19 9 14 7
8 1 22 5
1 14 4
9 19
20 8 5 18 5
20 8 5
23 8 5 14
23 1 19
20 8 1 20
20 8 5
2 9 12 12 9 15 14
19 20 18 9 16
16 5 18 3 5 14 20
8 1 4
20 15
12 9 14 7 5 18 9 14 7
14 9 7 8 20
1
20 8 5
1 14 4
2 21 20
9 14 3 12 21 4 9 14 7
20 8 5
20 8 1 20
9 19 19 21 5
19 1 25
20 15
20 15
20 15
9 14
6 15 18 5 9 7 14
6 5 23
20 8 5
23 15 21 12 4
6 15 21 14 4 1 20 9 15 14
19 5 18 22 5 19
20 8 5
2 5
6 15 18
8 1 22 5
23 1 19
20 8 5
1
20 8 5
9 14
15 6
4 9 4
20 8 5
1 14 4
20 8 5
18 21 14
4 5 1 12
23 1 19
6 15 18
1 13 15 14 7
8 9 19
19 1 9 4
20 15 15 11
25 15 21
20 15
1 19
25 15 21
2 5 20 20 5 18
7 9 22 5 14
20 8 5 25
12 5 1 7 21 5
6 15 18
13 5 20 19
2 15 18 4 5 18
19 20 9 12 12
19 20 1 20 5
7 15 1 12
25 15 21
23 8 15 19 5
25 15 18 11
20 8 1 20
20 8 1 20
5 14 4
20 8 18 15 21 7 8
1 14 4
2 5
6 15 18
2 21 19 25
20 8 5
15 14 5
20 8 5
20 8 5
20 8 1 20
19 3 8 15 15 12
6 15 18
15 6
15 2 10 5 3 20
1 14 4
16 5 18 19 15 14
19 1 14
15 6
19 3 9 5 14 3 5
20 8 5 9 18
9 20
20 5 18 13
20 8 5
12 5 7 9 19 12 1 20 9 22 5
1 12 13 15 19 20
20 8 5
19 1 25 19
19 1 9 4
7 15 9 14 7
20 8 9 19
19 3 9 5 14 3 5
20 8 5
5 6 6 5 3 20
23 9 20 8
20 8 5
2 21 20
19 5 1 19 15 14
20 18 5 1 20 25
4 9 4
1
20 21 5 19 4 1 25
20 8 5
20 8 5
16 5 14 1 12 20 25
20 8 5
13 9 12 12 9 15 14
16 18 15 19 16 5 3 20
15 6
15 6 6 9 3 5
13 9 7 8 20
23 8 1 20
6 15 18
9 14
18 5 13 1 9 14 19
4 5 13 15 3 18 1 20 9 3
15 6
16 9 1 14 9 19 20
1 19 9 1
23 8 15
15 6
19 20 1 20 5
23 9 20 8
3 1 19 5
20 8 5
21 14 20 9 12
16 5 14 20 1 7 15 14
20 8 5
9 14
8 1 19
8 1 19
20 8 5
23 15 21 12 4
16 15 15 18
1 14 4
3 15 14 19 9 4 5 18
20 8 5
1 21 4 9 5 14 3 5
13 1 25
20 15
5 21 18 15 16 5
6 21 20 21 18 5
19 21 16 16 15 19 5 4
6 15 21 18 20 8
16 15 12 9 3 5
4 5 6 5 1 20
9 14
1
8 1 19
10 21 4 7 5 19
2 21 20
15 21 18
5 1 3 8
20 8 5
19 1 9 4
20 8 5
15 6
23 5 19 20 5 18 14
20 15
8 5
16 18 5 4 9 3 20 5 4
23 15 13 5 14
20 8 5
19 1 25
13 9 12 5 19
4 9 6 6 5 18 5 14 20
19 8 15 21 12 4
9 19
3 5 18 20 1 9 14 12 25
8 1 19
18 5 3 5 9 22 9 14 7
3 18 9 20 9 3 19
20 15
15 6
13 1 14 8 1 20 20 1 14
16 1 9 4
14 15 20
19 20 1 20 5 19
20 15
20 8 5
20 21 18 14 5 4
8 1 14 7
3 1 19 5
20 8 5
20 8 5
23 8 5 14
19 1 9 4
6 18 15 13
2 25
12 1 20 5 18
19 8 1 18 5 8 15 12 4 5 18 19
25 5 12 12 15 23
6 15 18
16 18 15 2 12 5 13 19
13 9 7 8 20
6 9 14 1 14 3 5
5 14 4
20 15
16 18 5 19 19 21 18 5
20 8 1 20
1 16 20 12 25
20 8 5 9 18
9 14 22 5 19 20 9 7 1 20 15 18 19
2 25
20 8 5
20 21 5 19 4 1 25
20 8 5
3 15 1 3 8
20 8 5
19 5 5
16 1 18 20
2 25
20 8 5
20 8 5
1 2 15 21 20
19 1 9 4
20 8 5
23 9 20 8
12 5 7 1 12
16 12 1 25 5 18 19
23 9 20 8
20 8 5
23 1 19
1 14 4
3 1 14
4 9 3 20 9 15 14 1 18 25
15 6
20 23 15
20 8 5
15 6
2 5 14 5 6 9 20 19
19 8 15 21 12 4
23 8 9 3 8
15 14 5
3 15 14 20 18 9 2 21 20 9 15 14
23 1 19
1 14 4
1 22 5 14 21 5
23 5 1 18 9 14 7
7 1 13 5
1 14 4
16 18 15 7 18 1 13 19
1 12 23 1 25 19
9 14
13 15 19 20
6 15 18
20 8 5
19 21 18 5
20 8 5 9 18
15 6
1 20 20 5 14 4
20 8 1 20
1
23 9 12 12
1 12 12 9 5 19
18 5 16 15 18 20 19
6 15 18
18 5 3 5 14 20
1 20
6 15 18
1 7 18 5 5 4
18 5 13 5 13 2 5 18
20 8 9 19
8 1 4
20 8 5
19 1 9 4
16 1 18 20
8 9 19
20 8 5
19 21 3 8
20 8 5
3 1 18 5 5 18
20 8 21 13 2
15 22 5 18
6 15 18
2 5
20 8 5
9 14
18 5 19 5 1 18 3 8
20 5 1 13 19
23 8 5 14
16 1 19 19 9 15 14 1 20 5
8 1 14 4 12 5
25 15 21
8 1 22 5
18 21 19 8
23 1 14 20
5 22 5 14
20 8 5
9 14
1 14 4
20 8 5
12 15 19 20
13 1 4 5
14 5 1 18 12 25
1 14
23 9 20 8
20 8 5
7 1 13 5
9 20 19
13 1 16
1 14 4
19 1 9 4
6 15 18
1 14 4
9 20
20 8 5
1 7 1 9 14 19 20
19 1 9 4
20 15
16 18 15 16 5 18 20 9 5 19
9 14 3 12 21 4 9 14 7
15 6
19 1 9 4
17 21 9 3 11
20 15
5 24 16 5 3 20
1 14
20 8 5
9 14
23 1 19
15 6
14 15 20
20 8 1 20
13 1 14
1 14 4
1 14 4
20 8 5
1 14 4
1 14 4
21 14 4 5 18
19 25 18 9 1
3 1 14 3 5 12 12 5 4
6 18 1 7 13 5 14 20 5 4
9 19
19 21 18 5
23 8 15
20 8 1 20
9 14
20 15
20 15
12 1 19 20
19 20 1 20 5
20 8 9 19
20 8 5
20 15 15 11
21 14 20 9 12
2 5
9 14 22 5 19 20 9 7 1 20 15 18 19
25 15 21
25 15 21
16 12 1 19 20 9 3
20 8 1 20
20 8 5
20 9 13 5
13 15 15 18 5
20 8 5 25
9 14
16 18 15 13 9 19 5
20 8 1 20
20 8 5
19 5 12 12
20 8 5 25
3 1 18 5
16 1 18 20
1 2 12 5
15 6
20 8 5 25
15 6
20 8 5
20 8 5
2 5
7 18 1 14 20
9 19
1
20 8 5
13 1 4 5
2 25
20 23 15
14 21 20 19
3 21 16 19
23 15 18 11
7 1 13 5
15 6
20 8 5
23 9 20 8
23 18 9 20 20 5 14
15 6
20 15
15 6
3 15 1 3 8
9 20
13 1 11 5
2 1 14
3 15 14 20 18 15 12 19
20 8 5 9 18
25 15 21
1 14 4
20 15
15 6
2 5
20 8 5 18 5
13 9 7 8 20
1 12 20 5 18 14 1 20 9 22 5
20 8 5
3 15 13 16 1 14 25
15 6
15 20 8 5 18
15 6
20 8 5
1 19
1 14 4
1
2 25
19 16 5 14 4
8 1 22 5
9 14
20 18 1 4 5
20 15
20 8 5
8 5
2 21 20
1
15 14 12 25
20 8 9 19
15 14 5
20 8 5
3 8 1 18 12 5 19
15 6
20 8 5
1 14 4
6 15 18
20 8 5
23 9 20 8
9 14
2 21 20
1 14 4
9 14
20 8 5
15 14 5
14 15 20
6 15 18
8 1 22 5
23 8 15
19 5 14 9 15 18
2 15 15 11
3 1 14
15 6
9 14
1 14 4
9 14
1 14 4
2 5 7 1 14
20 15
19 5 20 20 9 14 7
15 6
19 1 9 4
19 20 1 20 5 19
20 23 15
1 16 1 18 20 13 5 14 20
15 6
23 15 18 12 4
15 6
3 12 9 14 20 15 14
3 1 19 5
6 15 18
14 5 5 4
16 12 1 3 5
19 20 18 5 5 20 19
20 15
1 14 4
9 14
20 15
20 8 5
1 14 4
15 6
13 15 19 20
23 15 18 11
19 8 15 23
20 8 5
11 14 15 23 14
11 9 14 7
20 8 5
13 15 18 5
20 8 5
15 6
20 8 5
2 5
2 15 20 8
23 1 19
1
5 13 16 12 15 25 5 5 19
16 9 14 11
20 8 5
20 15
20 8 5
20 8 5
15 6
6 15 18
23 9 20 8
7 9 22 5 14
20 1 18 7 5 20 19
15 6
20 15
23 9 20 8
23 8 15
22 5 20 5 18 1 14
20 15
10 15 2
20 15
19 8 15 16
6 15 18
23 1 19
1 14 4
1 19
19 1 25
15 6
6 5 23
16 12 1 25 5 18 19
20 8 1 20
6 9 14 1 12 12 25
15 6
23 15 14
8 5
3 15 18 18 21 16 20 9 15 14
19 20 15 3 11
18 1 20 5
20 8 5
20 8 5
1 22 1 9 12 1 2 12 5
25 15 18 11
15 6
20 8 1 20
1 14 4
1 14
23 5 18 5
15 6
19 21 18 5
4 1 22 9 4
16 12 1 3 5
23 8 5 14
15 6
15 6
13 9 12 12 9 15 14
3 1 18 5
2 5 7 1 14
15 6
8 9 19
20 8 1 20
8 1 22 5
8 1 22 5
3 1 12 12 5 4
8 9 13
9 14
20 8 5
9 14
19 25 19 20 5 13 19
19 5 14 9 15 18
1 19
20 8 5
20 8 5
1 19 9 4 5
15 6
20 8 5
14 15 20
9 14
20 8 1 20
6 21 18 20 8 5 18
20 18 1 3 11
12 9 13 15 21 19 9 14 5
2 15 4 25
16 21 18 3 8 1 19 5
15 6
20 15
13 9 12 12 9 15 14
1 20
20 8 5 9 18
1 14 4
1
23 1 14 20
12 5 7 9 19 12 1 20 9 15 14
20 8 5 25
3 15 21 12 4
8 5
1 14 4
6 18 15 13
20 8 5
12 15 19 20
15 6 6 9 3 5
15 16 16 15 14 5 14 20 19
23 15 21 12 4
6 15 18
19 1 9 4
18 5 19 21 12 20 19
25 15 21
19 1 9 4
4 15 9 14 7
9 14 6 9 5 12 4 5 18
8 1 4
19 1 9 4
23 5 18 5
9 19
20 15
18 15 15 13
20 8 1 20
1 14 4
13 1 4 5
25 15 21
1 14 25 20 8 9 14 7
2 25
8 15 12 4 19
23 8 15
6 1 18
20 8 5
9 14
20 23 15
1 2 15 21 20
20 8 5
5 14 4
20 8 5
8 9 13
12 1 19 20
1 14 4
20 8 1 20
6 18 1 14 3 9 19
15 6
5 22 5 14
20 15 15 11
1 2 15 21 20
25 15 21
20 8 5
20 8 5
6 1 20
6 15 18
19 3 15 18 5 4
20 15
23 1 19
20 8 5 25
20 8 5
15 6
23 15 18 11 5 18 19
23 8 15
19 5 22 5 18 1 12
23 8 5 20 8 5 18
8 5
20 8 5
19 3 9 5 14 20 9 19 20 19
12 15 3 1 12
20 15
15 14 12 25
1 19
20 8 5
4 9 4
1
15 6
1 14 4
19 20 9 12 12
18 15 12 5
23 1 14 20
6 15 18
20 8 5
5 22 9 4 5 14 3 5
3 15 21 14 20 5 18 3 21 12 20 21 18 5
8 15 23 5 22 5 18
20 8 5
1 12 13 15 19 20
5 6 6 5 3 20
23 9 20 8
15 6
20 15
1 14 4
9 20
22 9 18 20 21 1 12 12 25
15 6
2 21 20
2 5 3 1 21 19 5
19 5 12 12 9 14 7
8 5
2 25
20 8 5
20 15
15 14 12 25
2 21 20
20 15 12 4
14 5 1 18 2 25
23 1 19 8 9 14 7 20 15 14
12 5 4
12 1 19 20
20 8 5
20 23 15
9 14
23 8 9 3 8
1 14 4
20 8 5
8 5 18 5
20 8 5 25
18 5 6 21 7 5 5 19
22 5 18 25
12 1 19 20
15 6
1 12 12 15 23
15 14 5
20 8 5
20 8 5
20 8 1 20
20 8 5
20 15
15 20 8 5 18
1 14 4
19 16 15 11 5 19 13 1 14
15 6
19 20 1 20 5 19
20 8 5
14 5 24 20
3 15 13 13 9 19 19 9 15 14
20 8 5
2 18 1 22 5 19
2 9 12 12 9 15 14
20 8 5
2 21 20
15 6
7 1 13 5
8 1 22 5
18 5 16 15 18 20 19
1
2 21 20
1 14 4
20 15
20 8 5
13 9 11 5
14 15 20
18 15 1 4
3 8 9 3 11 5 14
3 1 12 12 5 4
5 24 1 13 9 14 5
23 9 20 8
23 15 21 12 4
8 1 22 5
13 5 1 14 23 8 9 12 5
20 15
20 8 5
20 8 5
1 14 4
15 14 5
15 6
20 8 5
9 14 10 21 18 25
3 1 12 12 5 4
6 15 18
8 9 19
15 6
18 15 12 5
20 8 5
6 21 14 4 19
13 15 19 20
1 14 4
13 15 18 5
3 1 13 5 18 1
15 6
13 9 12 11
23 15 21 12 4
20 8 5
6 15 24
20 8 5
20 8 5
4 9 19 1 19 20 5 18
23 5 18 5
15 6
19 5 20 20 9 14 7
19 5 18 9 15 21 19
15 6
2 21 20
20 8 5
9 20
23 8 1 20
20 8 5
20 8 5 25
8 9 13
19 21 16 16 15 18 20 5 4
20 8 5
20 15
9 14
1 6 20 5 18
20 8 5 18 5
20 15
13 5 1 14 19
1 20
19 5 1 19 15 14
14 9 7 8 20
20 15
13 1 25
20 8 1 20
13 1 25
9 14
8 9 19
20 8 5
3 15 12 12 9 14 19
20 8 5
15 21 20
2 5 1 14 19
20 8 5 9 18
1 18 20 9 3 21 12 1 20 5
20 8 5 19 5
8 1 19
25 15 21
7 1 13 5
8 1 19
15 23 14
15 21 20
5 24 16 5 3 20
16 21 20
11 5 16 20
13 1 25
1 6 20 5 18
15 21 20
5 6 6 15 18 20 19
20 1 2 12 5
20 5 1 13 19
13 1 14 25
6 15 18
1 12 20 8 15 21 7 8
18 5 19 21 12 20 19
1 19
15 6
2 9 7
12 5 1 19 20
16 1 18 5 14 20
23 1 19
1 22 5 14 21 5
8 1 22 5
20 8 5
2 15 20 8
19 21 18 22 9 22 5 4
20 8 5
20 8 5
4 1 25 19
15 21 18
8 1 19
19 1 9 4
20 8 5
6 18 15 13
15 6
2 21 20
23 9 20 8
6 1 13 9 12 25
1
20 8 5 25
19 20 1 20 5 19
20 8 1 20
20 8 5
6 21 5 12
1 19
8 1 19
4 18 9 14 11 19
15 6
18 1 9 19 9 14 7
15 6
15 3 20 15 2 5 18
7 5 20
1 14 4
13 15 18 5
1 14 7 5 12 19
20 8 5 25
12 5 4
20 15
23 8 15
5 14 4
4 15 9 14 7
20 8 1 20
23 1 19
19 15 13 5
20 8 5
19 9 14 3 5
20 8 5
2 15 20 8
1 6 20 5 18
23 8 15
19 1 9 4
19 3 8 15 15 12
19 5 5
2 15 14 4
1 19
1 19
8 5 12 16
15 6
14 5 24 20
15 6
8 1 22 5
25 1 14 11 5 5
20 8 9 19
6 15 18 3 5
8 9 19
16 1 18 11
2 25
19 16 15 11 5 19 13 1 14
19 1 20 21 18 4 1 25
15 6
20 8 9 19
9 14
1 2 15 1 18 4
20 8 5
15 14 5
15 16 16 15 19 5
23 8 5 14
7 1 18 25
20 8 5
1 20
20 8 21 18 19 4 1 25
15 6
8 9 19
15 6
12 5 1 22 5 19
20 8 5
15 6
10 21 19 20
20 8 5
9 14
15 6
20 8 5
16 15 19 19 9 2 12 5
13 15 22 5
3 15 21 16 12 5
2 15 19 14 9 1
1 13 15 14 7
16 8 15 20 15
10 21 19 20
13 15 22 5
15 6
20 8 5
4 9 4
23 8 15
1 14 4
2 15 20 8
15 6
1 12 19 15
1 14 4
15 6
19 20 18 9 11 5
20 18 5 5
2 5 3 1 21 19 5
7 5 20
20 8 9 19
1 14 4
2 21 20
23 15 21 12 4
23 8 15
23 15 18 11
1 14 4
20 8 5
1 4 13 9 20 20 5 4
12 5 15 14 1 18 4 15
8 1 22 5
5 13 16 12 15 25 5 5 19
18 1 20 5
23 8 5 14
23 15 18 11
5 21 18 15 16 5
15 14 12 25
23 9 20 8
11 9 18 2 25
19 1 9 4
20 8 5
19 15 13 5
23 15 18 12 4
20 8 5
7 18 15 21 14 4 19
1 14 4
20 8 5
20 15
25 15 21
20 8 5 9 18
15 21 20
8 1 19
23 8 9 3 8
19 20 9 12 12
18 21 14 19
9 19
20 8 5
2 21 20
20 8 5
20 23 15
23 15 13 5 14
15 6
2 21 20
20 8 5
9 14 6 15 18 13 1 20 9 15 14
23 8 15 19 5
20 15
20 8 5 25
20 8 5
20 8 5 18 5
3 15 13 16 1 14 9 5 19
9 14
6 18 15 13
20 8 5
13 25 20 8 19
1
3 15 1 3 8
6 18 15 13
20 8 5 18 5
9 20
2 5 1 21 20 9 6 21 12
20 8 5
7 18 1 13 19
20 8 5
20 15
15 21 20
1
14 15 20
19 20 1 18 20
15 6
4 15 5 19
20 8 5
19 1 9 4
16 18 15 2 1 2 12 25
9 14
23 8 9 3 8
9 14
20 15
1 14 4
7 18 1 14 4
2 21 20
5 6 6 5 3 20 19
20 8 5
20 18 9 5 4
19 15 21 18 3 5
20 8 5
1
20 8 5
1 14 4
2 25
20 8 1 20
20 8 1 20
16 15 12 9 20 9 3 1 12
8 1 22 5
20 15
4 5 16 1 18 20 13 5 14 20
8 9 19
18 5 3 5 9 22 5 4
1 20
19 1 9 4
18 15 21 14 4
9 14
2 5
8 9 19
14 1 20 9 15 14
23 1 19
8 1 9 20 9
20 8 15 21 7 8
20 8 5
20 8 5
1 20
8 9 19
8 5
23 1 14 20
13 1 18 20 9 14
15 6
18 5 16 21 2 12 9 3 1 14
9 14
3 8 1 9 18 13 1 14
1 14 4
20 8 5 25
8 1 22 5
20 8 5
1 14 4
2 9 7
15 6
1 14 4
1 14 4
2 21 20
19 20 9 12 12
5 1 19 20
18 1 9 19 9 14 7
13 15 19 20
20 8 5
1 12 23 1 25 19
16 18 15 4 21 3 20 9 15 14
15 6
23 5 18 5
13 15 18 5
23 9 20 8
1 19
6 18 15 13
20 8 5
20 8 1 20
20 8 5
15 6
20 8 5
20 8 5
19 3 8 15 15 12
4 9 6 6 5 18 5 14 3 5
19 1 9 4
20 15
8 9 13
1 14 4
19 9 13 16 19 15 14
3 1 14
15 6
18 1 3 5 19
16 1 18 20
8 9 19
16 1 18 11
23 1 19
7 5 20
20 1 11 5
1 14 4
17 21 9 3 11
20 15
23 8 9 3 8
6 15 18
3 15 14 14 5 3 20 9 15 14
