# Supplementary material
Source: ML conference proceedings conference paper supplement (https://proceedings.mlr.press/v37/steinhardta15.html)
Supplement: Supplementary file 2 [file steinhardta15-supp.zip › packaged-code/data/char-level/plain.txt]

a t
t h e
t h a t
w a s h i n g t o n
w i t h
t o
t h a t
m a n y
b u t
h o u s e
h i s
a
w a s
e v e n
i s
a
o f
y o u
i t s
a s
t h e
t o
t h e
r e p u b l i c a n
p o w e r s
s t i l l
p o i n t s
f o r
t h e
t o
p o s s i b l e
c a u s e s
a n
r i c h a r d
w h i t e
a s k i n g
t i m e
t h e
o f
w a s
s a i d
t o
l i t t l e
h o l e s
a
w e r e
i n
o f
p a i d
t o
h a v e
i s
a n d
h a l f
s t o r e
u k r a i n e
t h e
i s
a n d
t h e y
t h e
s a m e
t h a t
t h e
s h e
h i m
s t o r y
t o
l a s t
m a d e
p l a c e
t h e
b u t
t h e
d r u g
y o u
a l r e a d y
h i s
m a t t e r
w i t h
m o r e
t h e y
h o u s e
t o d a y
d o c u m e n t s
t h e
t h e
w a n t
p e r c e n t
o f
s h e
h i s
b y
t h e
s a i d
a n d
h i s
f u e l
m i c h a e l
t h e
f o r
o f
c i t y
r e s t a u r a n t s
f o r m e r
b i g
c h a n g e d
r e m e m b e r
h a s
i n
p l a y
m e t s
a p p e a l
t r a d e
t h e
a r m y
o f
a s
s i l e n t
w e r e
p r e c i s e l y
t h e
t h a t
o w n
f o r
o f
o f
t h e
w o u l d
s a y
a
t h e
g e r m a n y
t h e
f o r
o f
h e
a
a n d
i n
f o r
t h e y
a s k e d
t h e
a n d
s a y i n g
j u s t
m a k e
t h a t
h o u s e
t h e
t h e
w o r l d
n o r t h
h a s
i n v a s i o n
w h e n
t o
a n d
s t i l l
o v e r
a
h i g h l y
a n
c h a i r m a n
w h o
t h e
o f
l e t t e r
o f
a s s e s s m e n t
c i t y
p o w e r
t o
p e r s o n
s a i d
t o
t h a t
s a y s
t h e
a n d
t h e
d e c i s i o n
m e a s u r e s
s a i d
b o y s
r a c e
t r a c k i n g
f a m i l y
a n d
i t
d e t a i l s
n a t u r a l
t h e
s t a t e
h a v e
n o t
a
t h e
p r i s o n
h o r s e
m a n y
s i g n i f i c a n t
m o n t h s
w h o
w e e k
h i s
b e
t h e
p l a y
s a i d
o f
t h e
t o
t h e y
o f
c o n t r o l
a n d
r u n
w h e n
h o w
i n
t w o
p l a y
o f
l e a v e
h e
s i m p s o n
i n
i n
t h e
n o t
o w n
h a s
w a s
m a d e
h a s
i n f o r m a t i o n
a t
i n
t h u s
l a s t
i n d i v i d u a l
l a t e r
o f
a n d
t h e
t o
a s
t h e
h a v e
a n d
t h e y
t h e
f i l m m a k e r
t h e
d e m o c r a t i c
a d u l t
s t a t e
p e r f o r m a n c e
e n d
i t
t h e
a
a n d
i s
a n d
u n i t e d
o f
h e
t h e
a n d
i n
h i s
s o m e
t h a t
k i n g
t h e
n a t i o n a l
t h e i r
t o
a n d
a n d
b e h a v e
r a t e
f o r
t h e
s u i t
l i n e u p
o n l y
n e t w o r k
p l a c e
j u d g e s
t o
b u t
f a r
w i n d
f i n a n c i a l
a s
w h o
w i t h
p e r h a p s
t h e
t h e i r
t h e r e
i t
t h e
b u t
t h e
t h e
o f
w i n g s
b u t
e n o r m o u s
a n d
i s
t h e y
t h e
o f f i c i a l s
m a n u f a c t u r e r s
b e
t h a t
t h e
o f
o f
o f
i n
m o s t
t o
m e a n s
a t
i n
i n
p r o
h o u s e
f r a n k
g a t e
t o
o f
e f f e c t
b u t
t h e
t h e
t o
s o m e t h i n g
w h i c h
h e
h o w e v e r
t h e
n o t
t h a t
a f f e c t e d
t h e
t h e
s e r v i c e
t h e
t h e
o f
n e a r
o f
g o v e r n m e n t
o f
a n d
t o
a n d
w h a t
w h i c h
h a d
t o
t o o k
h e l p
w h o
w e s t c h e s t e r
a n
t e a r s
b a s e b a l l
c o u l d
a
t o
l a t e r
s h e
o u r
o f
t h e
b e
n a t i o n a l
e u r o p e
p o w e r f u l
w a s
t h e
t h e
s t a t e
t u e s d a y
t h i s
p r o b l e m s
o t h e r
w i t h
a w a y
w o r l d
k i n g
h i s
j u s t
g r a n d
e x p e c t e d
f r o m
t h e
t o
t h i n g s
h a v i n g
t h e
w i l l
i t
r o a d
a g a i n s t
c o m p u t e r
f u n d
a
t h e i r
f u n
y o r k
t h e
t h e
i t s
a n d
b u t
h i g h
t h u s
h e r e
h i s
h a s
a
i n
d i v e r s e
t h e
p r o b a b l y
t o
i n
f o r
s t r i k e
a
f a s t e r
a n d
a t
t h e
w i t h
s i n c e
t h e
t h e
i n
t o
w i l s o n
e a r n i n g s
t h e
t h e
f a i r l y
t e l l i n g
b y
i s
t h i s
c o u l d
r i g h t
c o m p e t i t i o n
s o l v e
a l l o w
t h e
l e a d e r s
o f
b o a t
t o
w i t h i n
t h e
i n a d v e r t e n t l y
t h e y
t o
o f
p e r c e n t
w h o
a n d
w h i t e
f o r c e
i s l a n d
d o e s
o f
w a s
a
w a s
s h e
j u s t
b o o k
h a s
t h e
j o h n
w h a t
h i s
a s
w o r l d
m a n a g e r
g a m e
c o m m i s s i o n e r
h i s
b o t h
d i d
t y k e
o f f e r i n g
e g g s
m o r e
o f
i n
c o u l d
f o r
t i m e
t h e
t o
b a r
f i n a n c i a l
m i d d l e
h a v e
o f
a b o u t
a n d
s u m m i t
j o b
t h e i r
w a s
t o
v o i c e s
t h e
g a m e
b y
i n
f r a m e
w r o t e
i t
t h e
t r e e
i s
b e
n o t
m o s t
i n
a n
t h e
n a t i o n a l
i t
i n
t h e
t o
w o u l d
t h e
a n d
h a s
t h e r e
t h e
o f
o f
l a s t
i n
c o u l d
t h e
b u t
a
t h e
o f
a r o u n d
y o u
a s
a n d
t h e
h i s
t h e
t h e
r e l a t i o n s h i p
w a s
s u r v i v e d
i n d i v i d u a l
o f
t h e
s a i d
i s
t h e
s h e
w h o
l o t
t h a t
g a m e
t h e
w h i c h
i t s
t h e
l o s e
r e q u i r e m e n t
t h e y
a n d
m o r e
c a l l e d
d i f f i c u l t
a n d
v i s i t
p o l i c e
t o
o f
b u s i n e s s
f o r
i s
a t
t h e
p r o p o s a l s
w a s
p r o g r a m s
j u s t
b u t
a r e a s
t h a t
t h e
f o r
t o l d
t h e y
t h e
i n v e s t m e n t s
b e
e u r o p e
a b o u t
t h e
d i s c u s s i o n s
a n d
a
t o
o f
o f
j u s t
m a k e
t h e
o n e
t h e
i n
p h i l
t h e
w h o s e
w a s
a s
w i n d
m i l e s
w a t e r
f o r
w h e n
t o
b u i l d
w o r k e d
t h e
w i n n i n g
t o
o u t
e f f e c t
i n
o f
t o
e l s e
t h e
t h e
a n d
h a s
c o n g r e s s
a
i n
t o
a t t e n t i o n
i n t e r v i e w
t h r o u g h
b u t
t o
f i n a n c i a l
i t
d a m a g e
t h e y
b e g a n
h i s
f r e s h m a n
c h a r g e s
k n o w n
l e a g u e
b y
p o l i c y
w o r l d
c l e a r
o f f i c i a l s
t h e i r
w a t e r
p e n a l t y
t e c h n i q u e
t h i s
t e l e v i s i o n
f r o m
t h e
p o w e r f u l
w o u l d
r a i s e d
a t
b a r g a i n
b a e r g a
w i l l
l o s e
t h r o u g h
t h e
t h e y
t h e
v o l u m e
t h e
t h e
w a s
p r o g r a m s
a n d
w h a t
w h i c h
t o o
t h e
o f
w h o
a l s o
e q u a t i o n
c o r r e c t
t h e i r
t h e
s t o r y
i t
t h e
e v e n
a n d
a n d
o u t
b e g a n
w e r e
l e a d e r s
t o
a n d
a s i d e
a t
w h o
h a s
e v e r y
m a k e
t h e
o f
t h e
t h a t
o f
a n d
b o t h
r u s s i a n s
o f
c a n
o f
t h a t
t h e r e
a r e a s
s a i d
i s s u e
o f
a n d
d o c u m e n t
g r o u p
y o r k
d e f e n d e d
i t s
h e r e
b u t
t h e r e
s t u d i e s
r e a l
i n
h i s
t h e r e
c a m p a i g n
i n
s o m e
t h e
a
w a s
o f
h o w
f o r
o f
t h e
s a l a r y
h a v e
f r o m
w h e n
t h e
a n d
s a i d
w a s
t h e
s h o u l d
f e w
p r o b l e m s
r i g h t
a
h a s
t h e
t h e
i s
t h e
d i s k
t o
w h a t
n e w
i n
s t a t e
a
f u t u r e
l o v e
o f
r e s i d e n t s
m o r e
w i t h
h a v e
o f
t r i a l
o f
i t
a
t h e
m i x e d
a t
l a s t
o t h e r
t h e
s a n
i t
t o
s e v e n t h
w h o
t o
c i t y
j u s t
a
o f
o p e r a t i o n s
a s
t o
a b o u t
l i t t l e
a
w i l l
a
t h a t
s h o w
n o t
t h e y
w h o
m o r t g a g e
m i g h t
a w a y
t h e
n o t
t h e
a n d
a n d
h a v e
o f
o f
t h e
b u t
n o r t h
t h e
s e a s o n
a n d
s o m e
a
h i s
i t s
a n d
a
i t
t h e
c o u l d
f o r
i n
l e c h
y o u
t h r o u g h
t h e
t i m e
b a d
a n d
t h e
b r o w n
o f
o n e
a
s a t u r d a y
r i s i n g
i n
a n d
m a n
w i t h
c o u n t y
l i e u t e n a n t
f o x
t h e
r u n
t h e
t h o u g h t
t h a t
t h e
o f
w i l l
t h e
g o a l
i n t e r e s t s
t o
t h e
n o t
a c c o u n t
t o
h i s
m o r n i n g
s t a t e
a t
t h e
h a s
s t a t e
p r e s e n t
m a r t i n
t o
i n t e r n a t i o n a l
w e e k
t h e r e
w o m e n
a s
b r e a k f a s t
f o r
t h a t
w i t h
r e q u i r e m e n t
t h e
o f
t h a t
s h e
t h e
t a r g e t
o f
t h e
b e e n
w h o
t h e
a d m i n i s t r a t i o n
f o r
w i l l
s a i d
t o
b u t
i n
w a s
s e a r c h
t o
a n d
g e t
h a d
o t h e r
t o o
w h o
t o
f a c i l i t i e s
o a k s
a f t e r
t h e
c o u l d
i n
i n t e r e s t s
b r i d g e
t o
h e
w i t h
w i t h
r e p u b l i c a n
p r o v e
o f
t h e
o u t
t h o u g h
t h i s
p r i c e s
e s p e c i a l l y
w h e n
s a i d
t o
w i t h
w i t h
t h e
s o m e
t h e
o u t
d r y
p e r c e n t
t h e y
a n d
o f
a n d
r e c e i v e d
w h e n
a t
t h e s e
w i l l
a n d
b u i l d i n g s
m a n y
t o
t h e
a
h a v e
s a y
t h e
o f
p r o s e c u t o r s
g e t
t h e
t h e
a l s o
t h e
a n d
d i d
a
s c o t t
o f
i s
h a d
d o i n g
w h o
o f
h a v e
i n
o f
t h e
t h e
i n
o n l y
s a i d
t h e
f r o m
i s l a n d
a n d
y o u
i t s
i t
n o r m a l
w i t h
t h e
c l i n t o n
w e l l
i n
c a r e
f o r
f o r
e y e s
c a r e
s e a s o n
r o w l a n d
d e p a r t m e n t
t h e
i s
o f
b r i n g
d e a t h
o f
b e t t e r
t h e
w i t h
t h e
i s
a n d
b e c a u s e
d e f i n i t e l y
o f
a n d
b e c a u s e
t r i e d
i n
m a y
t h e
t h e
i n
c a n
t h r o u g h
i n
y o r k
t h e y
q u e s t i o n s
m a t e r i a l
n o t
t h e
s a i d
o f
t h e
t o
w i t h
f o r
o n e
h a s
t h e
t h e
t h e
s a i d
h o u s e
g r o u p
g o v e r n m e n t
t h e
s t e p h e n
b e
t h e
b u t
a b o u t
t h e
o f
s e v e r a l
t h a t
t w o
c o n v e n t i o n
w a s h i n g t o n
h i s
t o
t h e
t h a t
t h e
h a v e
l o o k s
a n d
a n d
s a y s
t o
b o t h
w o u l d
l a t e r
t h e
a s
o f
f a r
c l i m b i n g
j o h n
h i s
g r a d e
a n d
d a n g e r o u s
m i l l i o n
a n d
a n
o f
a
o f
i n
a n d
w i l l
t a k e
m a y
e l d e r l y
a t
h a v e
e v e n
t h e
b e l i e v e d
o f f i c i a l s
i n
i n
b i l l
r e s u l t s
f u l l y
b y
t h e
r i c h a r d s
a n d
y o u
t h e
e v i d e n c e
s t a r t
m o r e
t o
s c o p e
a n d
w a s
t h e
p i c t u r e s
e x e c u t i v e s
b a l a n c e
e a s t
t h i s
h e r e
w h a t
a
t h e
i t
i n
d e c i s i o n
w h i c h
c o n c e r n s
o f
l a n g u a g e
o f
w i l l
a n
m i l l i o n
p r o f e s s o r
a s k e d
d i a r y
s a t u r d a y
b e c a u s e
a b o u t
t h e i r
t h e
w a n t
f o r
a
o f
e n d
e n d
c r i m i n a l
s a i d
t h e
h a s
s t a r t
w a s
l a s t
f o r
s t a t e
w h a t
a n d
a n y t h i n g
t h e
s e a s o n
i n
l a n d l o r d s
r e c e n t
t h e
a n d
b i l l
w a i t
w a n t
t h e
n o t
a n d
a
s a m e
e y e
h a s
t h e
t h a t
c a m p
i t s
s a i d
m a y
h i s
e c o n o m i c
i n d i a n
t h e
e x a m p l e
o t h e r
o f
o f
t h e
c h a r g e d
f r o m
b y
w a t e r
t o
i n
p u r c h a s e d
l o c a t i o n
c i t y
p e r c e n t
t h a t
t h a t
i t s
t h e
t h e
h o l d s
a n d
t h e
w a t e r
t h r e a t s
i n f o r m a t i o n
o f
t h e
a n
e f f o r t s
i t s
n e a r l y
r e m e m b e r
t h e
b u t
t h e
o f
t h e
m a n y
w a s
s a t u r d a y
t o
a n d
b a n
t h e
h i s
s t a t i o n
a n d
f o r
s a i d
u n i t e d
w i t h
i n
a n d
f a t h e r
a p a r t
f o r
f o r
i t
t h e y
p r o j e c t
b u t
c o m m u n i t y
c e r t a i n l y
t h e
t h e
w e l l
a n d
i t
b a s k e t b a l l
t h e
m e r e
t h a t
t o
w i t h
t h e y
t h e
w o r l d
h a s
t h e
w i t h
i n
s a i d
a
s a y
i n
t h i n g s
y o u n g e r
o f
w h i c h
c a n d i d a t e s
m a d e
i n
t w o
t h e i r
h i m s e l f
w i l l
s a i d
w o u l d
t h e
t h e i r
o f
c o n s i d e r a t i o n
t h e
t h e
t h e
a d d i n g
f o r
i t s
b e t w e e n
c o m m i s s i o n
s i n g s
t h e
t h a t
w h o
a n d
i t s
t w o
t h e
h e
l i t t l e
g e t
t h e
c h r i s
w o u l d
l e a s t
s t o r e
t h e
h a s
t h e
o t h e r
a n d
b y
t h e
t h e
s h e
t h a t
o w n
t h e y
b i g
a n d
a n d
a n d
h a v e
w r o n g
s i m i l a r
p r o s p e c t
t h e
b o t h
w h i c h
o f
a w a y
a g e n c y
t h e
f a t h e r
s h o w
b a k e r
i n
o f
l e w i s
a n d
w h o s e
o f
f a t h e r
o f f i c i a l s
s a i d
i n
b e
t o
t h e
a n d
p r o b a b l y
f o r m a l
d e a l
a b o u t
b u t
o f
t h e
t h e y
e a s t
o f
r e f e r r a l s
o n l y
o f
c o n t r o l
a s i a
a n d
t h e
a n d
m o r e
h a v e
s t i l l
i n
t h e y
a t
l a s t
c r i t i c a l
t h e
s u c c e s s
n a t i o n a l
w a s
w a s
e u r o p e
t h e
t o
l e d
w e r e
b o r n
t o
m o s t
g o v e r n m e n t
t h e
c o m p l e t e
t h e
t w o
o f
a t
t o
e v e r y o n e
e a c h
d e m o c r a t
d a v i d
b u t
j o b
l a s t
t o
m a d e
t h e
a t
t h e
b u t
l e a d s
t h e
a b o u t
i n
w i t h
t h e
t h e
a n d
s t a t e
t h i s
w o u l d
n e x t
t u e s d a y
w i t h
t o
w h a t
h a s
s u c h
t h e
s u c h
c o n t r o l
o f
o f f
b u t
t h e
p i z z a
w e r e
y o u
a n d
t o
o f
w h a t
t h e
s o m e o n e
s t a t e
i t s
a n d
m o n t r e a l
a t
r e a c h e d
t i m e
t h e
g o v e r n m e n t
t h e
s c i e n c e
t h e
a n d
t h e
a b o u t
t h a t
t h e
o f
m o r e
i n
w i t h
l e a g u e
p o l i c e
f o r
i s s u e s
a t
a n d
s h o u l d
m i g h t
a f t e r n o o n
w r o t e
g e r m a n y
t h e
f o r
w e r e
b i r t h
b e
h a v e
t h a t
a n d
w i l l
f o r
h a d
t h r o u g h
t h e
h i s
a
p o u n d s
s a i d
t h e
f o r m e r
b y
t h e
s h e
a
p a s s e d
w a s
t h e
i n
h o w
y o u
t h a t
g e t
l o v e
a b o u t
p r o b a b l y
t o
o f
w h i c h
m a n y
s t a r t s
o f
o f
w h o
p r o g r a m s
t h e
t h i n g s
t r a i n s
s e a s o n
p e r f o r m a n c e
o f
a
t o
t h e
c h i c a g o
l e d
w i t h
i n
s h o w
t o
t h e
a n d
a
t o
s o m e
a
f o l l o w i n g
m i l l i o n
a n d
p r i n c i p l e s
m o r e
s o u r c e
t h e i r
s e n s e
s a m e
a p p e a r a n c e
i n v o l v e d
t h e
b u t
s e e m e d
t h e
t h e
v i s i t
i t s
l e a d e r s
c o u p l e
h a n d
h e b r e w
h e
p a c k
a
t h e
t h a t
t h r o u g h
s a i d
w i t h
a l r e a d y
t h e
s a i d
t h e
t h a t
i s
r u n
t h e s e
e v e n
t h e
t i m e
a
a g e n c i e s
p l a y e r s
o f
t w o
t h e
a u d i e n c e
m e a n w h i l e
a
t h e
i t
h a i t i
w h o
a s
t h e r e
o f
t h a t
a n d
d e a l
t h e
p r o d u c t
t o
f i e l d
s h o w
w i l l i a m s
t o
t h e
t h e
t h e
t h a t
t h a t
i t
a m e r i c a n s
a n d
t h e
t h i s
s p e c i a l
b e l i e v e
f i v e
w o r l d
t h e
w i l l
h a s
t h a t
t a x e s
n o t
r e f u g e e s
t h e
t o
s i t t i n g
d e p a r t m e n t
s a y s
i n
m i t c h e l l
t h a t
t h e
h u s b a n d
a g e n t
n e w s
n e w s
j u s t
b r o k e
t h e
t h a t
o f
c l i n t o n
m i l l i o n
t h e r e
o u t
i s
a n d
f u n d
f o r c e
s e n t
a n d
h o m e s
l a s t
i n f o r m a t i o n
i n
w o r t h
f i n a l l y
b u t
w a s
t h e
o f
u n d e r
o f
c l a i m i n g
o f
p a i r
t h e y
o n e
t h e
f o r
a
a
w i t h
s h o w
p r e s e n c e
o f t e n
o f
t h e
t h e
s u e d
s e n i o r
i t a l i a n
h o u s e
o f
t h e
a n d
w o u l d
e v e r y
w o u l d
a f t e r
b o o k
n e w
p e r f o r m a n c e
w a s
t h e
t h e
t h i s
a n d
t h e r e
s a i d
l o w e r
a n d
s a i d
u n d e r
t h e
l a w y e r
t o
o f
l a s t
e v e r y
b y
h a v e
u n i o n
i n
t h e
d r i v e
t h e
i n v e n t e d
o f
n o t
l a s t
a f t e r
o f f i c e r
t o
c o m m i s s i o n
e v e r y o n e
p a r t
a m o n g
n e a r l y
o f
m o r e
p r o t e c t
b e t t e r
t h e
o f f i c i a l s
w e l l
l a s t
t h e
f o r
h a v e
p e n a l t y
b y
t o
o w n
a l w a y s
t h a t
t r a d e
a n d
t h e
i n
s a i d
o f
d i d
t h r o u g h
w h e n
s h a r e
a h e a d
s t a t e
a
l o o s e
t h a t
b y
w i t h
t o
t h e i r
h a n d
d a v i d
h o m e s
h a s
t h e
e c o n o m i c
t h e
t h e
t h i s
b u t
o n e
s c h o o l
w h i c h
a
c a s e
c h a n c e
c o n s u l t i n g
t o
h i s
i n
c a s e
t h e
t o
a t
t h e
o f
a t
t h e
h a v e
s u c c e s s
s t a t e s
t h e
s e v e n
s a i d
c o n g r e s s i o n a l
t h e
s e p t e m b e r
a n d
a v a i l a b l e
d i f f i c u l t
t h e
t h e i r
a b o u t
f i l m s
e u r o p e
a s
t h e
f o r
n o t
a n d
h o w
g o v e r n m e n t
o f
n o t
h e
o f
a n d
t h e r a p y
i n
t o
l i t t l e
h e r
m o s t
i n
s a y
a
w i t h
f o r
b u t
p l a y
c r o s s
c a l l e d
h o p e s
t h e
f o r
i t
b e g a n
f o r
t o
t h e
a b o u t
a
o v e r
w a s
a n d
i n j u r y
t h a t
m o s t
b e t t e r
h i s
i n
t o
s i n g e r s
c y b e r s p a c e
l a n g u a g e
a n d
b e
d a u n t i n g
o f
o f
y o u
w o r l d
c a m p
i n
t h r o u g h
i t
t h i s
a n d
f r o m
s a i d
t h e
f u l l
t o
t h e r e
t h e
d e c i s i o n
c a n
f e w
t h e
t h e
w i t h
b r i t i s h
a n d
b u t
h i s
a n d
t h e
t h e
s h o w
w e l c o m e
m a n a g e r
b e
p o l i c e
t h e
t h e
t h e
i t
t h e
d e p a r t m e n t
s e v e r a l
o f
t h e
i n
n a t i o n
r i g h t
f i e l d
t h e
h a v e
o f
i n
t h e
s e r v i c e
s o m e
i n
i n
a h e a d
t h e
a n d
a
i n
w h o
t h e
o f
p r o d u c t
w h e n
p e r c e n t
s l o w
a n d
t h e
h a v e
e x p o r t s
o f
t o
t h e
m a n y
s c h o o l
w a s
j u s t
r o o m s
t h e
o u t
b u t
i d e a s
e n d i n g
w h a t
n e x t
c h a i r m a n
a t
a
w i t h
a
s t o c k h o l m
t h e
d i f f i c u l t
c o n t r o l
y o u n g e r
t h a t
h e n r y
o f
i t s
w o r k s
t h e y
b e c a u s e
l e t
i n
w h o
t h a t
a r o u n d
t h e
t h e
o f
s t o r y
h e
w h a t
w i l l
i n
t h e
o u t
h e
t h e
m i s t a k e
g o i n g
h e a d
f o r
i s
m a k e
t h e
a t l a n t a
p s y c h i a t r i s t s
t h o u g h t
o f
a b o u t
b u t
h i s
f u n d s
a n d
f a b r i c
t h e
p e r c e n t
o f
w e e k
b r o t h e r s
h a v e
t o o k
o f
i n
t e x a s
s c o r i n g
a r g e n t i n a
e x a m p l e
t h e y
b u t
t h i s
h i m
h i s
o f
c o n t r o l
a w a y
h a s
t h e
o f
n o r t h
t h e
s e e m s
t h i s
a
c l a i m
o f
t o
j e t s
h o w e v e r
w h o
f o r
t h e s e
r i g h t
c a l l e d
t h e
s t a t e
o f
m o r e
t h e
d e t a i l e d
q u e s t i o n s
h a v e
a n d
f o r
t h e
h a i t i
f i s h e r m a n
b u t t e r
c h a n g e
s a i d
b e c o m e s
t h e
o f
a s
o f
t h e
t h i s
v a r i e t i e s
s t a d i u m
b o o k
t h e y
p r o f e s s o r
t h e
o n l y
a l o n g
s o m e t i m e
r u n
c l i n t o n
i n
f r i d a y
w e r e
c l i n t o n
c l i n t o n
e n d
a t
s t a t e
o p t i o n a l
s a y s
t h e
t h e
a
s p e c i a l
l a s t
v o t e
w a i t
a n
a n d
t h e
o f
m a k e
t h a t
i t
s o m e o n e
o f
w i t h
s u r e
h e
w a s
m i l l i o n
p a y
i n
a s
o f
t o
o f
b e c a u s e
h a d
c r o s s
n a t i o n a l
t h e
t h e
o f
h a s
i n
f o r
h i g h e r
i t
a n d
t o
a g a i n s t
b u t
b u i l d i n g
w o u l d
o f
o f
o f
f o r
p e r c e n t
r i d e
m o s t
i n
p o s s i b l e
b e h i n d
r i g h t
t o
c l i n t o n
h a v e
w a t e r
c a s e
a n d
t h e r e
s u r e
c h i c a g o
s h e
n o t
m o r e
t h e
h i s
i t
h o u s e
t h e
p e r c e n t
m a n y
t o
w a s
o f
b l a c k
o v e r
n e w
f o r
i n c l u d e s
b o t h
t h e y
w h o
a n d
c l i n t o n
t h e
f o r
t h e
a n d
w a s
o f
m i l l i o n
p r e v a i l e d
a
a n d
b u t
l a s t
t h i s
a n d
i n
t h e
t h a t
a w a y
b u t
t h u s
w h o l e
o n e
t h e
m i l i t a n t s
f u r t h e r
t h e
t h e
m a r k e t s
y o u
t o
a
t h e
t h e
w a s h i n g t o n
a
t o
s h o u l d
a l t e r n a t i v e
w a s
s a i d
t o
i n
s u c h
c a n
t h e
c l i n t o n
t h e r e
t h e
s a i d
h i m
t w o
h a v e
t o
l a s t
w h o
s a i d
t h e
o f
t h e y
g e t
a n d
w h i t e
t o
t o w n
i n
a
c o u n t y
t o
t h e
i n
d i r e c t i o n s
h a v e
o f
f o r
a w a y
a l m o s t
o f
w h o
t h e y
s a i d
t h e
a n d
v e r y
w h i c h
s u p p o r t e d
t h a t
t h e
p a r t
h e r
h a v e
t h e
o n e
s a i d
p r o b a b l y
t o
s e v e n
f o r
g o v e r n m e n t
p u t
t h e i r
g a m e
o f
p r o b l e m
b o o k
w a s
w i t h
o f
l o u i s
h i g h l y
w i t h
a
n o t
m o r t g a g e
y o u
i n
a n d
t h e
h e r e
t h a t
c o u n s e l
t u r n
s h a r e
r o m a r i o
b e
y o u
g a m e
i n
c o u l d
t o
w i t h
c o u l d
n o t
h i m s e l f
a n d
t h e r e
i t s
t h e
w e r e
i n
t h e
t h a t
d e m o c r a t s
t h e
t o
a
i t
f o r
i s
l e g a l
t h e
f o r
s c h o o l
s t o c k s
h a v e
t h e
v a c u u m
s a y
s p e e c h
s a y s
o f
a t
a n d
l o t
n i g h t
i n
o f
t h e
d o z e n
s a i d
w a s
t h e
t o
r e a l i z e d
t h e
f o r
o f
s h o w
t h e
e s t i m a t e d
t h a t
r i n g
i n t e l l i g e n c e
w o m e n
o f
h i s
t h o u g h
t h e
t h e
b u t
m e m o r y
t o
w e r e
t h e
a n d
t h e
w r i t e s
c a s e
t h e r e
o p e r a t i o n s
t w o
o f
s o m e
p r o g r a m m i n g
t h e
h e
k e y
a p p e a r
a s
h a s
s a i d
i s
t h e
f o r
e l d e r l y
k i c k
a v a i l a b l e
t h e
c h i e f
n e w
p o l i t i c a l
w i t h
i n
a d m i n i s t r a t i o n
t h a t
w a s
t h e i r
t h a t
t o
i n
e x a m p l e
r o s s
b e
w a t e r
t o o k
p i l o t
h a d
h a v e
o f
h a s
b u i l t
i n
w a s
t h a t
s h e
o f
t h e
i n
h e
c h i e f
c a r e
n e a r l y
w h o
s t r e a k
a t
s e v e r a l
t h a t
h a s
t h e
f r e n c h
t h e
s t r i k e
t i m e
t h e
s e e
w a s
a
i t
s a y s
t h e
t h e
r e a c h e d
s c o t t
t w o
t h e
a t
f u l l y
s u n d a y
l i t t l e
o f
t h e
r e f u g e e s
t h a t
o f
t h e
t h e
t h e
t h a t
t h e
j u d g e s
a
h i m
w o r k
n o t
c o u n t y
h a v e
t h e
t h e
j u s t
t h e
t o
b o r n
o f
p i t c h e r s
t h a t
d e s c r i b e d
f o r
m o s t
g i v e n
i n
f o r
c a m p a i g n
c o u l d
a
b u t
t h e
o f
w i t h
t h e
d e s c r i b e d
o f
m o s t
o u r
g e t s
s a y i n g
t h e
e v e n
w a s
h o w e v e r
a n d
i n v e s t i g a t i o n
y o r k
t h e
w h i t e
w e l l
a
s o l i d
i n
b u s i n e s s
s o m e
n a t i o n a l
o f
t h e
b y
r e a l i z e d
m e x i c o
t h e
e x p e c t
f i v e
a d d e d
t h e
b u t
t o
m o r e
e v e n
f a s t e r
p l a y e r s
s a i d
t o
a n d
t o u g h
o f
t h e y
h a v e
a
t h e y
f i v e
d i d
a s
t h e
t h e
a n d
h i s
f o r c e
h i s
a n d
f o r
a
a
t o
t h a t
w e e k
t h e
h a s
i n
l e g i s l a t i o n
u n d e r
t h e
t a k e
w h e t h e r
t h e
c o m p a n i e s
t h e
a
w i l l
f i n a n c i a l
s t e p h e n
t h e
w e e k
t h e
m o s t
f o r
c o u l d
c a r e
b i g
t h e
a d d s
t w o
p o i s o n i n g
s a i d
h a s
s a n
l a t e r
f o r
f r o m
r e m e m b e r
n o t
r u n n i n g
d a r k
e u r o p e a n
t h e
i n
v i s i t
o p e n e d
a n d
t o
c o m p a n i e s
t h a t
a n d
w a s
t h e
t o
b y
a l t h o u g h
b o t h e r
w a s
r e a l
t h e
h o u s e
a t
m o r e
b e
a n d
t h e
t o
a l w a y s
t h e
b o a r d s
a n a l y s t s
e v e n
i n
s e r i o u s
t r a i n i n g
e v e n
i n
i t s
a n
b u t
s a i d
t o
o f
a n d
s e v e n
b y
t h e
t o
t h i s
r e q u e s t s
t h e
h o s p i t a l
w a s
t h e
a n d
c i t y
a f t e r
t h e
c a n
s e n i o r
t h e
s a i d
t h e
a
o f
w h o
s h e
t h e
r e f u g e e s
i n
s a y s
o f
i t s
l i g h t
m a k i n g
h a s
s a y s
a
a n d
w h i c h
s h a k e
t o
a n d
w h i c h
i n
s e p a r a t e
o f
s a y i n g
h a v e
n o t
a
a n d
t h e y
o f
d i d
w i t h
a
a n d
n e w
o n e
t h e i r
b i l l
w o r k
b o t h
i n
e v e n
t h e
o w n
t o
t h e
t h a t
w h i c h
t h e
m o s t
s h e
a n d
s a i d
t o
h i s
a t
f r o m
m o n d a y
i t
h a v e
d i d
i t
r e a s o n s
h a v e
h a s
t h e
i s
t w o
a l r e a d y
s h e
w h o
s a y s
c a n
d a y s
s a i d
a
g e t
a g a i n s t
m i l e s
f r o m
t h e
b a k e r
t h e
t h e
e n d
s e a s o n
f o r
o f
w o u l d
a n d
t h e
p h o t o
s h e
b i g
s o m e
t h e
i n
r u n s
p a s s i o n
t o
k e y
a l m o s t
a
o f
w e r e
m o s t
c o u l d
m a k e s
a f t e r
q u e e n s
c a r e
c a n
s t u d e n t
f o r
i n
d e p t h
s h i p
i n
s e r b i a n
h o w e v e r
y o u
o f
w i t h
t h e r e
t h e
a n d
b y
g a r y
m o u n t a i n
t o
h i s
p r o f i t s
f a t h e r
t o
i n v a s i o n
i n c l u d e s
i n c l u d i n g
n o t
s h o o t i n g
h a v e
t h e
d u m b
t o
t h e
i s
p a y
t h e
y o u
a
t h e
s t i l l
n o r m a l
m a r r i a g e
j u d g e s
t h e
t h a t
a
t h e
t a k e
c o u l d
a n d
i n d i v i d u a l
w h o
h e
w h o l e
w h o
o n l y
f o r
t o o k
t i m e
a n d
t h e
o n l y
o u t
b i t
t h e
g r a n d
s t y l e s
a n d
c a u s e s
t h e
g e t
i s
a n d
i n
p o l i c y
r e c e i v i n g
c a m p a i g n
p r i m a r y
j u d g e s
a n d
t h e y
a n d
p e r c e n t a g e
t h e
w h a t
o f
h a v e
a l t e r n a t i v e
l e a s t
t h e
s a n
w h e n
w h o
a n d
t h e
h i m
n o t
c l i n t o n
o f
a n d
t h e
c a r s
w a s
o n e
h e l d
s a i d
a t
a n d
g a m e
t h e
n o t
k i n g
t o
b e
o u t
o f
t h e
i t
h e r
t h e
s a y
w e r e
t h e
n e w s
o f
p r i c e
l o w e r e d
s e a s o n
t h e
o f
h i s
s h e
a s
y o u
w r a p
i t
p l a n s
o f
c a s e
h a s
c a n
s o m e o n e
h o u s e
a n o t h e r
t e l e v i s i o n
a l m o s t
w a n t
t h a t
a n d
b a s e b a l l
c o l o r
a n d
j u s t
i n d u s t r y
t h e
c a n n o t
s a i d
w h a t
o t h e r
f o r
h i s
t o
b y
w e r e
o f
o f
b e g a n
o f
r o l e
s a y
a
i t s
j u s t
w e r e
g a m e
w i t h
m a y
o f f i c e
t h e
t h e
f o r
w h o
j e w i s h
l a s t
i n
i s
d o e s
o n l y
b e
s a y
d o i n g
f i n a n c i a l
t h e
a n d
h i s
d r i n k i n g
b o t h
t h e
a n d
a n n o u n c e d
s i t u a t i o n
s h o u l d
a t
w h i t e
i n v e s t i g a t o r
t h a t
o b j e c t
o f
p r e s s u r e
s o m e
t h e y
t e a
t h o u g h t
a n d
w h a t
t h e
t h e
t h e
t h i s
n o t
a l w a y s
a m o n g
e a c h
t h e y
b a s k e t b a l l
a l s o
w e e k
m o n d a y
c o n c r e t e
m a n
j o u r n a l i s t s
t h e
a g a i n s t
w r i t t e n
g e t s
a n d
m a y
j u s t
t o
o f
s a i d
h a s
t h e
c o u p l e
t o
o p e n
o f
n e w s p a p e r
n o t
j u s t
h a v e
p o l i c e
i n
s o m e
h e a r i n g
c h a p t e r
e x p e c t
w i t h
t h a t
t h e
y o r k
c u t s
w a s
t h i s
b i d e n
a n y t h i n g
t h e
f o r
m a n y
s t o n e
w h o
t h e i r
f u n d
p e r s o n
t o o k
s o u l
h i s
g a m e
d e v e l o p m e n t
t h a t
a n
o f
f l a v o r
t o
a
w o r l d
w o u n d e d
b o y s
s h e
c a s e
t h e
w a s
p r i s o n
v e r y
a u t h o r i t y
w a s
t o
e v e n
b e l o n g
t u e s d a y
a n d
b y
h i s
t h e
w h e n
a s
s t a r t
h a s
n o t
a n d
f o r
t h e
i t
o n e
t o o
h a d
h e
t h r o u g h
p o o r
p u t
b e l o w
w i t h
o f
p e r c e n t
w e s t e r n
a n d
a n d
t h e
a n d
i t s
f o r
t h e
i t
c r o w d
a s
l i t t l e
m u r d e r
j i m
w i t h
e u r o p e a n
o u t
a n d
o f
o f
p a r e n t s
a i r p o r t
i t s
b y
a n d
s e a t t l e
m u t u a l
t h e
s t a t e s
t h e
m e n
a n d
s e v e n t h
f o l l o w i n g
p r i c e
f a r
w i t h
w i t h
s e v e r a l
h a s
t h e
t h a t
o f
t h e
t h e
b y
c a s e
f i n a n c e
b u t
t h e
w i t h
f r o m
s e o u l
h a v e
n o t
i n
t h e
v i r u s
o n e
o f
f a v o r i t e s
t o
i t
s t a t e
r o m a n i a
i n
i n
f a m i l i a r
r e f u g e e s
a
i n
m a n y
f o r
t h e
f r e n c h
d i s c u s s
t o
a n d
t h e r e
b y
t h e i r
h a s
t h a t
d o z e n
m a n a g e r
t h e i r
a b o u t
s c h o o l
w i l l
t r a d i n g
p o o r
w e r e
b a r
g r o u p
s a i d
c o u l d
w o r k
h e
t h a t
c a m p s
i n
a r o u n d
t h e
m o r e
t o
y o r k
t h a t
t h e
w r i t t e n
w h e n
t h e
w a s
s e v e r a l
t h e
w e r e
t h e
w h o
t h e
s t y l e s
a n d
i n
t h e
a r o u n d
w e r e
t h e i r
n e x t
c a n
m e m b e r
h a s
o v e r
h a v e
w e r e
t h e
t h e
i s s u e
p o l i t i c i a n s
f o r
a n d
a g a i n s t
a n d
o f
c o u l d
t h a t
t h e
t h i s
m i l l i o n
a s
h i s
p o w e r
w i t h
w h a t
t h e
b e
e n d
t h e
a l o n g
o n e
t h e
m a t c h e s
i n
g i v i n g
a n d
h a s
c l a s s
t h e
t a b l e
o u t
p e n d l e t o n
w o n d e r s
t o
f r o m
i n
a n d
h a v e
t h e y
i s
i s
o f
a n d
s a i d
o f
c h a n g e s
t h e
d r i v e
m a t e r i a l
c o u l d
a n d
t o w n
p l a y
u n i t e d
o f
p r a i s e d
s i g n i f i c a n t
h i s
p h o t o
l a s t
o f
m a k e
s h e
b r a n s o n
p r o b l e m
s a i d
t h e
o f f e r e d
t w o
t h e y
w i t h
p l a y
o f
w o r k e d
i n
t o
w a n t
c a n
p r o j e c t
t h a t
a
i n
s a i d
w i t h
o u t s i d e
l e g a l
i t s
p a i d
a t
a n d
a n d
t o
s a i d
i n
t h e
a l w a y s
w e e k
d o e s
d i a l o g u e
e c o n o m i c
i n
t o
t h a t
s a i d
o f
t h e
s o m e
c h a i r s
a n d
t h e
w o u l d
m a k e
h a l f
h i s
f o r
w h i c h
m o r e
b e c a u s e
a n d
e x t r e m e l y
w h e n
t h e
s i g n
a g a i n s t
t h a t
s u m m e r
t h e
s t a t e
p l u m m e t e d
t h e
i n
f r e e d
o f
g o a l
t h e
b r o a d e r
t o
c h i c a g o
a s
m e a n s
a n d
a l m o s t
n e x t
s a n
s c e n e
p l a n t s
b r i n g s
p l a n n e d
s t r i k e
p e a c e
s h e
l u n c h
o f
m o r n i n g
a n d
a n d
w h o
t h e
f a m i l i a r
b u t
i s
w h o
e x i s t
o u t l e t s
i n
h e
a f r i c a n
a l s o
t h e
b e l o w
h e
a n
s a i d
t h e
f r i d a y
w h a t
t o o k
t h a t
s h o u l d
w h i t e
b u s i n e s s
t o
b u t
f a m i l y
e n o u g h
h i s t o r y
h a n d
s t a t i o n s
e a s t
i n
t h e
i s s u e
t h e
i n
s a i d
c h a i r m a n
e s p e c i a l l y
t h e
d e p a r t m e n t
o f
a l w a y s
t h e i r
h i s
t o
a n d
o u r
p l a y
t h e
b a s i s
f r o m
b e t w e e n
s t a r t s
t h i s
d e l l
m o s t
t h e
f a m i l y
f o r
g o a l
t h e
a n d
a r e a
p l a y e r s
o f t e n
t h e
a
w i t h
w i t h
h a v e
t h e
p l a y
f o r
b a s e b a l l
n o t
f o r
f r e e h
i n
p e r r y
f a l l e n
a
a d d e d
t h e
s o m e
w h o
y o u
h i s
w o u l d
h a v e
t h a t
a g a i n s t
a n d
t e a c h e r
w i l l
b e g a n
t h e
l i t t l e
t o
b u i l d i n g
o f
t o
s a y i n g
u n d e r
n a t i o n
h o w
p o l i c e
p a n e l
t h a t
a n d
y o u
f o r
b u t
o f
w o r k i n g
o n e
l a t e r
i t s e l f
g e t
t h a t
w a s
o f
a b o u t
w o u l d
o t h e r s
i n
a t
r e p o r t s
o f
s a i d
s u c c e s s
j u s t
a
w i t h
i n
s u r e
n a t i o n
a n d
b i l l i o n
p l a n n e d
g r o u p
w a s
t h e
c o n f e r e n c e
p r o p o s a l
t h e
c o n v i n c e d
i n
t o
w o o d s t o c k
c o l l a p s e d
w a s
o n e
t h a t
f o r
o n l y
t o
t h e y
o f f i c i a l s
o f
i n
t h e i r
c o u l d
w h a t
t h e
w o u l d
i n
t r i a l
t h e
i n
f r a n k
i n
a
h i s
b e g a n
f a s t e r
p e r f o r m a n c e
c r i t i c i z e d
n o t
o w n
y o u
h e
w e e k
a t
f e w
h e
l a s t
w h o
c a n
s e n s e
t u r n
t w o
t h e
w a s
w a s
w i l l
t o d a y
o f
a s
o f
c o u l d
l i m i t e d
w o r l d
h i s
t h a t
e a s e
t h e
i s
t o
g r o w i n g
s u i t
t o
w a s
n o t
a
w h a t
a n d
i n
t h a t
b u t
t r e e
n o t
h a r b i n g e r
w e r e
u n d e r s t a n d i n g
w h o
b e
p i c k e d
i n c o m e
w o r t h
a n d
t h e
l o n g
t h a t
c i t y
i t
f o r
t r a i n s
t h e
t h e
t o
s a i d
g e t
w h i c h
o f
s t a t e
t o
t h e
c o n t r o l s
b u t
i n
i s
o f
t h e
n o t
m o n t h s
t h e
l o c a l
m a k e
o f
m o r r i s
a n d
s a i d
i s
a n d
i t
p l a y e r s
l e a v e
i t
t h e
t h e
h a s
t h e
t h e y
s e a r c h
t h i s
t h e
t h e
t h e
t o
i t
t h a t
t r i e d
a n d
h a s
a c c e s s
t h e
a l t h o u g h
o n e
b e c a u s e
m a r r i a g e
o u t
a c t u a l l y
p o i n t e d
m e r e
t h e
h a s
t h e
n o t
w i t h
o f
h a v e
t h e y
a t t a c k
t h e
m a n y
t h e
s o m e
e x p e c t e d
y o u n g
a
p o s i t i o n
w a s
a g a i n s t
t h e
i s
o f
y o r k
o f
t o o k
a n d
t h e
c a n
o f
t h e
a n d
t w o
h a s
n u m b e r s
t h e
w i t h i n
t o
p e a c e
b i g
b y
t h e
s t a t e s
s t r i k e
y o r k
t h e
o t h e r
t h e
s a i d
i t
b u t
h e
r e m e m b e r
w h o
c o u l d
w i t h
m u s c l e
p r o j e c t
t o
n e w
i n
g o v e r n m e n t
a b o u t
t h e
w a s
h a v e
p r i c e
t o
t w o
t h e i r
g e t
c h i l d
t o
i d e a s
c o u l d
e v e n
t h e
o p e n
t h a t
a u d i e n c e
h e
j o i n t
p o w e r
g i v i n g
a s
a n d
o f
u n i t e d
m i x e d
o f
b y
m o r e
t h e
t h e
m o n i t o r i n g
m i l l i o n
t o
g e t
f o r
p o i n t s
j o n e s
h a v e
h e r
o f
y o u
p r o g r a m s
t h e
a l r e a d y
t h e
t h e i r
l o s t
t h e
t h e
o u r
o f
o n e
t o
p o s s i b l e
o f
s a i d
w o u l d
s a i d
i t
a
p o l i c e
a n d
i n
g o v e r n m e n t
h o r s e
p r o p o s a l s
o f
t h e
i n v o l v e d
w e r e
t o
p o s s i b l e
a n d
w h e t h e r
o n e
m i l w a u k e e
t h e i r
c a r e
s t o r e
l e g a l
h i s
d o n e
f o r
a n y o n e
w o u l d
t h e
s i d e
r e s u l t s
s e n s e
t h e i r
n o t
h a n d l e
l e a s t
s t r u g g l e
s c o r i n g
t h i s
h a v e
i n
o f
o n e
d e c l i n e
m o s t
a s k e d
t h e
a n d
w h e n
t h e y
u n i o n
t h e
o f
t h e
l a n d l o r d s
t h e
d i s t r i c t
s e s s i o n
t o p p e d
t h e
m o r e
p a s s e d
p e n t a g o n
i n
o v e r
o f
i t
s c o p e
f o r
f o r
s i g n
i t s
s h o u l d
t i m e
t o o k
o u t
f o r
s h e
a f t e r n o o n
t o
a l s o
t h e
t h a t
h i s
s e n t
w i t h
c o m f o r t a b l e
t h e
w i l l
p r i m a r y
w o u l d
s a i d
s u i t
s a i d
n o i s e
a
j o b
b y
t h a t
e v e n
h a n d
t h a t
o f
f o r
a b o u t
h i l l s
i n
t h r o u g h
s a y i n g
b u t
t h e
r o b e r t
w i l l
s e v e r a l
i s s u e s
n o t
t h r o u g h
i t
t h e
t r u m a n
t h e
a
w e r e
a n d
f i v e
a g a i n s t
g a m e
t h a t
o f
t o
t o
a n d
a
s c h o o l
t h e r e
w h e n
f o r
i n
f o r
r e p u b l i c a n s
p l a y e r s
a
t h e r e
t h i s
a r a f a t
b y
n o t
o r g a n i z a t i o n s
l e a g u e
l i s t e d
p r o m o t i o n s
t h e
t o
g e t
s p e a k i n g
o f f i c i a l s
y o u
g o v e r n m e n t
a t
t o
t h e
r e p o r t s
b e t w e e n
t h e y
c o u l d
a n d
h o u s e
t h a t
o u r
c o m p a n i e s
b e
w i l l
t h e
d e a t h
a
h i s
t h a t
t o
i n
c o u l d
a n d
t h e
t h e
a
r i d e s
n e w s p a p e r
a
c o f f e e
b e t w e e n
t o t a l
a
b e c a u s e
s a m e
a n d
r u l e
d e a t h
t h e
t e s t
i n v e s t m e n t s
t h e
i n
m a n a g e r
t h a t
n e e d
d i f f e r e n t
t h e
a n d
m i d d l e
m a c h i n e s
h e l d
i n
t h e y
n o t
c o u l d
i n
n e x t
a n
a s
f r o m
w r o n g
t h e
f o r
b u t
a
n o t
o f
c a r e
i t
w r i t e r
t r a n s m i t t e d
a
h i s t o r y
s e r v i c e
f o r
a n d
w i l l
t h e
b u s e s
v o t e
s t o r e
a
b e e n
t h e
h i m
b y
a n d
y o u
t h e
b e c a u s e
m o s t
p e r c e n t
p e o p l e
e v e n
w h o s e
w i l l
s e a s o n
s t o r y
t o
h e a d
t h e
t o o k
a
a n d
d i f f i c u l t
t h e
t h a t
r o l l
w h o
w h e n
w i l l
t o
o f
n e w
y o u
t h e y
m i c h a e l
o f
a b o u t
m i x
w o m e n
o f
l e a v e
s y s t e m s
s a i d
s e v e r a l
i t s
e x e c u t i v e s
t h e
t h e
o f
t h e
e m e r g e d
t h e
t h e
t o
s t r i k e
t h e
p r e s s u r e
m o r e
h e
b l a c k s
t h e
a n d
o n e
o f
h a s
b e
i n
h a v e
e v e n t u a l l y
t h e y
m i l l i o n
t o
a
t a y l o r
f o r
b u t
d e m a n d s
n o t
o f
a s
t h r o u g h o u t
t h e
t o
a n d
w o r l d
d e m o c r a t i c
b e e n
t h e
f i n a n c e
b e
i t s
a n y w a y
i n
i n
h a s
o u r
o f
t h o u s a n d s
t h i s
p r o f e s s o r
c o u l d
g a r d e n
o f
o f
g r o u p
t h e r e
i s
m e e t
a n d
c o u l d
t o w n
t h e
r u n n i n g
m i l l i o n
i t
w a s
t o
t o o
w h i c h
t h a t
o f
d e c l a r e d
c a m e
n o t
i n
c r e d i t
d o e s
o n e
t h e
f o r
n a s t y
t o
t h e
h o w e v e r
t h e
w h o
p e o p l e
b a t t i n g
o u t
t h e
b e c a u s e
e v e r y o n e
t h o u g h
o f
h i s
f a m i l y
a l m o s t
w a s
d i s t r i c t
n e w
o n e
t h e
m i l l i o n
b u s h
i n
f o r
t o t a l
c o u l d
e n t i r e
t h e
m u r d e r
c i t y
t h a t
a
n e e d s
t w o
o v e r
t h e
t h a t
o f
a t
c r a t e r
i n
t h e
w h o
t h e
t e x a s
w r o n g
h i t t i n g
t h e
c h a r g e s
l i t t l e
b u s y
h i s
i t
t h i n k i n g
a m e r i c a n s
a t o p
f o r
b y
t h e
l o o k e d
a l o n g
t o
t i m e
o f
b a d l y
b e g a n
t h e
e x p e c t e d
e f f o r t s
s a i d
a n d
a n d
s t a t e s
t h e
m o r e
t h e
t h e
w i l l
i n
o f
b y
o f
t h e
f o r
m o v e
t o
p a r t
o f
t w o
e x a c t l y
i t s
t h e
i s
h a s
w a s
n o t
l a r g e s t
t i m e
m i t c h e l l
s e e
s a i d
b e
t h a t
t o
g o v e r n m e n t
w h i c h
t h e
t h e
t o
w h e n
o w n
d i d
e v e n i n g
v i s i t e d
p o s i t i o n
f o r
k n o w s
t h a t
t h e
w o u l d
s o m e
a l s o
s h e
h e r e
o f
a n d
w h o
h o l l y w o o d
f o r
t h e
t r a i n i n g
i t
a
a n d
a n d
t h a t
a
w h o
g a t h e r e d
t h e r e
p r o c e e d i n g s
s o m e
s t a t e
w a s
o f
a
o n l y
s u b j e c t s
a n d
t o
h i s
d i s e a s e
i n
p a y
w a s
i n
g a m e
o r l e a n s
c l a i m
t h e
t h e y
t u e s d a y
p l a c e
a n d
f o r
w h a t
i n
f i v e
w i l l
t h a t
o f
t h e
s h e
w h o
i t s
t h e
e x a c t l y
i n
w h i c h
p o p u l a r
t h e
t h e
h a s
h o u s e
m i l e s
t h e
j u s t
i s s u e
o f
c o n f e r e n c e
j u p i t e r
w i l l
t h e
s a i d
t h e
s a i d
h e
t h e
c o l u m b i a
p r o j e c t
p e r c e n t
r a c e s
e c o n o m i c
l e g a l
w i l l
h a d
i n v e s t i g a t o r s
t h e
o f
b o t h
c h a i r s
t h e
b e s i d e s
t o
o f
t h a t
o f
t h o u g h t
t h e
t h e
o f
w h o
t h a t
l o o k e d
e f f o r t s
s t a t e
f i n d i n g s
f u n d
h e
r e c e i v e d
t e a m s
s a n t a
f o r
o f
c a u s e d
t h e
m i s s
t h e
a
h a v e
s t u d y
t h a t
i n
a n d
i n v o l v i n g
f o r
t h e s e
p r o b l e m s
w o r l d
a n d
w h a t
b l o c k s
s p o t
t h a t
e n t e r
f o r
t h e
g o v e r n m e n t
t h i s
b e
t h e
p e n a l t y
a n d
a n d
w h i l e
t r u m a n
w i n d
t h e
t o
t o
o f
h a d
t h e
t h e r e
t h e
t o
f l e d
p i t c h e r s
h a l f
t h e
t h a t
t h e
t h e
a n d
l a s t
t o
t h e
t h e
w a s h i n g t o n
s o m e
s e r i o u s
o f
b e
w e e k
s a y s
c h i e f
y o u
n e w
c h a n g e
c o u l d
s a i d
y o r k
t h e
a f t e r
m o r e
w h o
w h o
a r e a s
f o r m e r
t o
w o u l d
s e a s o n
t i m e
t o
h e
a t
i t
j u s t i c e
p u t
t h e
y o r k
a n d
t h e
t o
w a s
w a s
a n d
i n v o l v e d
c a r e
s a l a r y
a n d
w a s
w o u l d
t h e
a n d
w h o
w h o
s y s t e m s
a f t e r
w h a t
w i l l i a m
l a y i n g
t o
s t a r t
t h e
t h e
t h e
f o r
w i l s o n
n o n e
b e
r e f u g e e s
t o
n e t w o r k
g a v e
i s
c a l l e d
h a s
w i t h
b e
s h o u l d
v e r y
t h e
t h a t
t h e
f r e n c h
t h e
h a s
a
i t s
i t
t e s t i m o n y
f o r m a t
a
e n d
p e r f o r m a n c e
i n
d i d
s t e p s
w a s
n o t
i n
d e a t h
o f
m i l l i o n
e a c h
o f
t h e y
o t h e r
a t
o f
s i m p l e
w o u l d
o f
a b o u t
o f
i t s e l f
a
p o p u l a r
f o r
i n
g e r m a n y
o w n
t h i s
t o
a
a n d
a n d
a
y o u
s o m e
a
t h a t
a f t e r
t o
t h e
d i f f e r e n t
a n d
o f
p e r f o r m a n c e
s a i d
f u n d
h a d
i t
g o v e r n m e n t
t h e
b e g u n
o f
f o r
a r t s
w e r e
c o m m u n i t y
t h a t
c u r r e n t
t h e
t h e
a t
o n e
o t h e r
t h e
e v e n
m a r a d o n a
m i l l i o n
t h a t
t a l k
e v e r y
t h e i r
s a i d
r o a d
f o r
t h e
m a y
f o r m e r
c a r e e r
j u s t
c a m e
t h a t
b u t
l o n g e r
t h e
a n d
a n d
h a s
t o
a s
t h e
t o o k
h a v e
t h e
r o l l
s p e n t
a n d
h i s
w i t h
i n c l u d i n g
w i l l
o u t
g r a d e
t o
w h o
o f
t h e
a m e r i c a n s
c o a c h
h o w e v e r
p o o r
s h e
c o m p a n y
r e n t
s h o u l d
i n
w o r k i n g
t h e
s u c h
p l a y e r s
t h i s
h a s
f o r
t o
n o t
t h e y
y o r k
i n
f o r
v a l l e y
w i t h
a
a n d
f o r
o f
a t
w h i c h
t h e
s a i d
t h e
a b o u t
t h e
a c c e p t
f i s h
d i e d
t h e
t h e
t h e
m a k e
i n
e n d
t h e
o n e
t h e
t h e
b u t
i s
t h e
t o d a y
o f f i c i a l s
h i m
f o r
t h e
e v e n
t h e y
o f
t o
i n
b u s i n e s s
t h e
h a s
o f f i c i a l s
t h e
l a s t
e v e r y b o d y
t o o k
t h e y
b u t
a n d
i n v e s t i g a t i o n
t r a i n i n g
p l a y
i n
p l a y e r s
a t
j u s t
h a v e
t h i n g s
t h e
t h a t
t h e
t h e
o n l y
n a t i o n a l
t o
a l s o
o f
n a t i o n a l
s t r e e t s
c a n
t h e
t h e
t h e
w o u l d
p r o b l e m
p a c t
w i t h
w i l l
d e a t h
t o
t h r o u g h
h e r e
s a i d
b r o a d e r
a n d
t h e y
t i n y
t h e
b o t h
s a i d
h i s
s a i d
t h e
w o u l d
w o r l d
h a v e
o f
f o r
a n d
l a s t
o f
a g a i n s t
t a l k
n o t
n e e d
n i g h t
m o r e
a g e n c y
a
i s
t h e
t h e
s a i d
t h a t
f o r
t h e
t h o u g h
h e
l a s t
m o b
t h e
o f
a t
e x p e c t
c o u l d
o f f i c i a l s
b e c a u s e
a n d
f o r
o n e
i n
d e a l
j o h n
t h e
i n
s e e i n g
f o r
t h e y
t o l d
c a n
t o
t h e
t h e
p e r s o n
h i s
w i t h
o u t
e l s e
a n d
i s
a n d
a n d
m i l l i o n
s a i d
t h e
a t
r o a d
t h e
i t s
t h e
s o m e
s t a t e s
a n d
p r e s e n t
t h e
t e a c h e r s
i n
s a i d
a n d
w i t h
t h e
s a i d
s m i t h
c o n t r o l
s t a t e s
t w o
b i l l
m o s t
t h e
i n
t h e
l i m o u s i n e
b o o s t
o f
n o t
t h o u g h
o f
t h e
k i n d
o f
t h e
t o
w h i t e
s a y s
a d m i t t e d
o f
m a n a g e s
t h e i r
h e l d
t h e
s c e n e
t h e
t h e
k i d d
t h e
a n d
a n d
t o
b u s i n e s s e s
j u p i t e r
w i t h
o f
i n
t o
t h e
t o
a l o n g
a t
a b o u t
f o r
a n d
a n d
n o r t h
t o
t h e
t h e y
t h i s
w o r l d
i n
t h a t
n o t
o f
i n
t h e
t o
t h e
c l i n t o n
o f
y o u
t h e
h i s
d e m o n s t r a t e s
s o n
f o r m a l
c o m i c
i n
o f
s h e
s a y
w i t h i n
t h a t
i t s
r e l a t i v e l y
s i n c e
p a r k
y o u
s a l a r y
t o
o t h e r
i n
h a p p y
d e e p
r i g h t
l a s t
a b o u t
h i m
h i s
c a l l s
m e n
f l o r i d a
t i m e
a n d
v e r y
t o
b e t w e e n
t h e
a n d
p a c k w o o d
h e
a p p e a r a n c e
a n d
a t
t e r m
g a m e
w i l l
s u i t
w e l l
o f
a
s a i d
d o n e
i n v o l v e d
t h e
o f f i c i a l s
g e t s
s a i d
t h e
h a s
o f
w h o s e
p r i d e
t h e
i n
b o o k
m u s c l e
t h e
n o t
t h a t
i n c l u d i n g
t h a t
s t r i k e
i n
i n
w a s
n o r t h
n o t
p u r s u e d
i n
o w n
h e
e x a c t l y
t h e
n e x t
h a s
o f
t h e
j u s t
n e w
i n v e s t m e n t
a s
i n
h i s
s a i d
t h e
a t
w i t h
t o
f o r
w o r l d
f r o m
d a y s
a w a y
b u t
s a i d
i n
i n
s c h o o l
l a c k
i n
w h e n
p r o b a b l y
j u s t
w h i c h
a n d
p r o d u c t s
t r a d i n g
b e r r o a
w h i c h
s c i e n c e
t o
b o r d e r
s a i d
k n o w n
b e h a l f
a s
b y
h i s
b u t
o f
t h e i r
o f
s a y s
i s
w h e n
a
p e r c e n t
o u r
o f
t h e
f o r
i n
o n e
w o u l d
m i l l i o n s
y o r k
e v e n
h e l p
w a y s
o f
l a s t
b e t w e e n
o f
h a s
t o
a b o u t
t a r g e t
d a y s
t h e
c a r s
c a n
t h e
t h e
r e c e n t
o f
w i t h i n
t h e
c e i l i n g
m i x e d
f o r
o f
l o s e
y o u
w o r l d
n o t
t h i s
w a s
s o m e
g o v e r n o r
a n d
a
s h a r e
p o l i c y
d a n g e r o u s
r a p i d l y
t h e
a n d
a l w a y s
a n d
h i s
s a i d
v o t e d
t h e
a f t e r
m o v i n g
t h e
f i v e
h e r e
t h e
e v e n t
t h e
d e f e a t
r u n
a s
a n d
l a r g e s t
f o r
t o
o f
r e f u s e d
h a v e
j e f f
c o u l d
a t
r e f o r m
c o n c e n t r a t e
p a r t
t h e
t h e s e
w h o
f o l l o w
c o m p u t e r
t h e
c o m b i n i n g
t r i p
s a i d
y o u
i n t e r e s t e d
r e s i d e n t s
r e g i s t e r e d
o f
b e
t h e
h o u s e
t h e
h a d
w a s
s a i d
t h e
e n c o u r a g i n g
o f f i c i a l s
f i e l d s
c o w b o y s
a l o n g
t h e
t h e r e
a m o n g
t h e
a
y o u
t h e
t o
t o
b e t t e r
i n
o f
t h e
t o
f a i l s
l a s t
t h e
f o r
a n d
t h e
m i t c h e l l
a n d
e x p e r t s
t h e
c h a i r s
f a c e s
m i g h t
w a s
o f
d o i n g
s o m e
m a t c h
l a s t
t h e
f o r
a n d
t o
s e v e r a l
s a n
t h e
t o
o p e n e d
s u n s e t
t h e
g a m e
f o r
t h e
w o r t h
c a l l s
h a v e
s i x t h
a n d
s a i d
t h e
y o r k
n o t
t o
f o r
c o n t r o l
r e f o r m
o f
d e a t h
p r o b l e m s
t h e
h i s t o r y
f u n d
a
w r i t t e n
i t s
w i l l
s h e
t h e y
w e d d i n g
o f
w o r k s
t h e
a
o u r
t h e
o f
t o
t h a t
m a d e
o f
c l i n t o n
n e a r
h i s
s e r v i c e
a n d
t h e
s e r v i c e
p r i d e
i n
w e l l
t o w n
p r a c t i c a l
n e w
s e a s o n
h a d
m o r e
t h e
t h e
t h e
y o r k
t o
w o r t h
h e
a s
h a v e
m a j o r
t h e
b y
b y
c o n t a c t s
a
w h e n
i n t e r n a t i o n a l
o f
t h e
m o s t l y
w h o
s t a d i u m
t o
s a i d
b u i l d i n g
s t a t e
w h e n
a c t i o n s
w o r k e r s
a n d
t h e
t e r m
t h e
t h a t
a n d
f o r m e r
i n
g e r m a n
i n
t h e
w a s
a
w h o
d e p a r t m e n t
t h i s
d a y s
l o v e l y
a t
a n d
o f
w h i c h
b e c a u s e
w e r e
t h e
t h e
o f
o n e
o f
s e n t
t h e
c i t y
t h e
h o u s i n g
t o
b y
t h e r e
n a t i o n a l
w a i t
i s
m i l e s
f e w
t h i s
i n
o t h e r
h o r s e
w i t h
c o m p a n y
a
c l i n t o n
a n
n o t
p r i s o n e r s
h i s
o p e r a t i o n s
w e r e
j o h n
s e r v i c e
t o
n e e d i n g
h o w
a n y t h i n g
t h e
o n e
c r o w d
d i a l o g u e
s o l d
t h e
s i n c e
i t s
s a y i n g
i n
w h o
h i s
i n v e s t m e n t
a h e a d
a n d
h e l p
t h e
i n
o f
w o r l d
o f
t o
v e r y
t h e y
h a s
a n d
i s s u e d
t h e r e
s t o r e s
a n a l y s t s
t o
t h e r e
j e r s e y
t h e
g o v e r n m e n t
w o r l d
a g a i n s t
w a s
o f
a s s e t s
c o r r u p t i o n
p a r k
i t
w o m e n
a
c o n f e r e n c e
t o
t h e
b y
t h e
a f t e r
i n
h a v e
t h e
a n d
t h e
f r o m
i n
w o r k s
o p e r a t o r s
a n d
h a l f
h i s t o r y
w h o
e n c o u r a g i n g
n e x t
t h a t
t h o u g h t
f o r m a l
r i g h t
t h e
r e c e i v i n g
w i t h i n
t h e
t h e
t r a d e
s h a v e
t h e
a n d
m i g h t
t h e
b u t
o n e
p e r s o n
f o r
f o u r t h
a n d
t h e
w o u l d
a
f o r
b r o n x
t h e
w r o t e
i n
t o
o n l y
s a y
p r o d u c t s
o f
c a r d e n a s
a s k e d
t h e
s h e
t h e y
a s
t h e
t r y i n g
t h e
m a k e
d i f f i c u l t
b r o t h e r
i n
c a n
t h e
t h a t
w i l l
t h e
i n
o f
b r o n x
a t
a n d
i n c l u d i n g
a s s u r e d
a n d
c l i n t o n
p a r t n e r s
t h a t
t o
h e r e
i n
w o u l d
w o r t h
m i l l i o n
t h e
h i s
w a t e r
t h a t
i t
w h i c h
b e
w a s h i n g t o n
c o m m u n i c a t e
t r u c k
e d g e
t h e
a b o u t
g e r m a n y
o f
a n
s o m e
f o r
t h e
b e c a u s e
h i s
t h e
j u s t
t h e
t h e
a
t h e
a n d
w e l c o m e
a n d
t o
a n d
d o n e
o p e n
w a s
t h e
t o
o f
a n d
h i g h
g i v e
t h e i r
f o r
s h e
t h e i r
m o s t
g a m e
o f
f o r w a r d
w a t e r
t h e
m a y
b e c a u s e
c i t y
p o w e r
w r i t t e n
t u e s d a y
a n d
i n f o r m a t i o n
t h e
w r o t e
c o m m u n i t y
a
o f
w o u l d
h i s t o r y
b r i t i s h
v o t e
w a s
o f
i n
t h e
o f
h i s t o r y
f o r
l e a d e r
m o s t
t h e
y o r k
o f
o f
g e t
o f
t h e
p r i o r i t y
t o
t e a c h e r s
a
c a m e
b i t
t o
a g a i n s t
a g e n c y
w i t h
w r i t e s
s a i d
t h e
y o u
a
r u n s
r o n a l d
n o t
a n d
t h e
s i n c e
t h e
b y
l e t t e r
t h e
a g e n c y
b u t
t h e
s e r i o u s
o f
a l t h o u g h
t h e
w i l l
t h e
h a v e
w h i t e
s o m e t h i n g
o f
l a c k
n i g h t
c o n t a i n i n g
g r a c e
t h e y
o f
t h e
b e
p a n e l
t h e
p a y
i s
i n
a n d
a b o u t
h a v e
s a i d
t h e
d a y s
a n d
t h a t
b u t
l a u r a
b o o k
a n d
w o u l d
m o n d a y
c o v e r
h i m
a n d
t h e
a n d
p o u n d s
m i l l i o n s
a c t u a l l y
i t
c l e a r
t h e
i n
t h e
w o m e n
t h e r e
g r o u p
d e a t h
m a k e
t h e
t o
w o u l d
o f
o f
s h e
t h e i r
f o r
h a s
r i g h t
a n d
t h e
p e r c e n t
f u n d s
t o
i n
n e x t
u n f o r t u n a t e
o f f i c i a l s
h a p p e n
w o m e n
b o y s
o f
w i t h
t h e
t r u e
c o u l d
j e r s e y
b y
t o
s a i d
t o
a l s o
w h a t
b u t
s a i d
t o o
f o r m e r
o f
i n
h a v e
t h a t
t h e
s u m m e r
o t h e r
o f
o f
h a s
h e
w h o
w h e n
h a s
a n d
a
o t h e r
t i m e
s a i d
f o r
o u t
r e f e r r a l
t h e
a n d
t a k e
o f
p o l i c y
l i m i t e d
o f
t o
m o r e
w o u l d
t h e
f r a n k l y
t h a t
a n d
a s
r u s s i a n s
b e t w e e n
t h e
t h e
t h e
y o u
o f
m a y
t h e
f e a t u r e
t h a t
c o n v i c t e d
s e e
t o
m o v i n g
d e b a t e
o f
f r o m
a n d
m o v i n g
t h e
i n
t h e
t h e
s t o r e
w o r k
b l a c k
r e c a l l e d
t o
e a c h
r e d u c e
t h e
t a x i n g
t h e
t h e
m o r e
a l r e a d y
i n
b y
h e r e
t h e
w a s
t h e
n o t
t h e
b y
h e
s e t t i n g
i n
t o
i n
i n
e n v i s i o n s
t h e
u n l i k e
f r i d a y
g a r d e n
a p p l e
w a n t
f r i d a y
t w o
l a c k
i n
i n
t h a t
h i s
t h e
t h e
b u t
a n d
o f
t h e
e v e n
o n l y
t h a t
w a s
o u t
t o
w e e k
t h e
d e p a r t m e n t
t h e
w i l l
h i m
o v e r
d u e
a n
b o t h
a
a n d
o u t
t o o
o f
w a s
s h o u l d
t h e
a
a n d
c h a i r m a n
i n t e r e s t s
w o m e n
t o
o f
a
o f
o f
h e l d
i n
a l m o s t
t h a t
t h e
i n
a b o u t
s i m p s o n
b e
c r i m e
t o
t h e
h e
m i x
i n
t h e
t h e r e
b u t
a n d
b u t
o u t
s e n t
a c c o u n t
c a n
w o r l d
d i d
t o
t h e
p r o m i s i n g
a n d
c h i e f
t o
a n d
i n
t h a t
s e v e r e
a s k e d
t h r o u g h
t o
s c o r e
o f
f r i d a y
u n i o n
t h e
t h o u s a n d s
a t
a n d
i n
s a y
t h i s
o f
w a s
p e r c e n t
a t
s t a t e
e x a c t l y
a t
a s
o f
t o
w h o
i n
i t s
t h a t
w o r k
p r e s e n c e
t h e
i l l i n o i s
p r i n c i p l e s
o f
s a i d
o f
s e a s o n
w i l l
o f
g e t
h o u s e
t h e
b r i n g
o u r
m i l l i o n
s e a s o n
w i n t e r
t o
h a s
i n
i n
s o u r c e
o f
b i g
t e l l s
w i t h
a n d
n o t
t h e
c o m p e t i t i o n
s e a t s
i n
n e w
d o e s
h i s
t h e
a n d
w i l l
t w o
a
t h e
w h a t
t h e y
a d d i n g
a n d
m a t e r i a l
h i m
e v e n t u a l l y
b l a c k
w r i t t e n
h a v e
h o u s e
a n d
t h e
a
f o r e i g n
i n
o u t s i d e
i n
w a i t
t h e
l o v e
h e
c l a i m
g e t
b u t
m u r d e r
w o u l d
o f
f o r
t h a t
o f
l o o k e d
b y
o f
t w o
t h e
o f
a s
c o u l d
a n d
a n d
t h e
d i f f e r e n t
p o w e r s
c a r e
o t h e r
h i s
n a t i o n a l
s h e
c a m p a i g n
m i c h a e l
h a v e
h i s
w h o
h o s p i t a l s
c a n
b e
a g e n c y
m o r e
c o n g r e s s
b u i l d i n g
i t
h o l d e r s
w r o t e
t h e i r
m e a n
e v e n
a n d
t h e
f u n d s
a b o u t
a n d
s a i d
p a r t n e r s
t h e
o f
h i s
d e p a r t m e n t
i s
t h e
w i l l
p e r c e n t
o u r
n a t i o n a l
t h e
w a t e r
s t u d i e s
l a s t
l e t
h i s
t o l d
c r i t i c s
e c o n o m i c
t i m e
g e t
l a s t
t h e s e
a n d
s a i d
g e r m a n s
q u o t e d
t o
n e e d
w h e n
i s
a n d
b a i l e y
a n d
a g r e e
s o r t
p o p u l a r
b u s h
b u t
s a i d
c o m p e t i t i o n
t h e
m a n
a t
w a s
t h a t
a d d e d
w o o d e n
d e a t h
a n d
s e n a t o r
l o v e
a b o u t
s o m e t h i n g
w a s
t h u r s d a y
b u t
o f
r e p o r t s
i n
f r i e n d
t h e y
t h e
w h o s e
t o
t h e
i t
d e s t r o y
f r o m
g a m e
s h o w
b i l l
r u l e
i n
a n d
w h a t
f o r
t i m e
a l s o
d e t a i l s
b a l a n c e
t h e y
h i s
t h e
i t s
n o t
c h i e f
s t a t e
a n d
h a s
t h e
t h e
n o t
a l o n g
i n
h i m
a
o f
t o
a n d
t h r o u g h
i t s
w h o
t h e
h i s
b a t t i n g
c o u n t r y
a n d
w a s h i n g t o n
s h e
r i s i n g
i n
a n d
c l i n t o n
i s
t h e
o f
f o r
c l o s e d
c l e a r l y
b e c a u s e
a n a l y s t s
i s
m i l l i o n
t h e
t o
c o t t o n
h a v e
f o r w a r d
w o u l d
t o
e m p l o y e e s
o f
t e s t
w e b
a n d
o t h e r
a n d
h i s
t h e
w h o
t h a t
o f
h a v e
w h e n
j o i n t
g o v e r n m e n t s
t h a t
s t u d e n t
t h e
w h o
c a m p b e l l
t h e
r e f u s e d
y o u
i n
d i f f e r e n t
s t i l l
a n d
w o r l d
n o t
g o v e r n m e n t
o f f i c i a l s
i n
s a y
s a i d
i n v e s t i g a t o r s
m a t t e r
i s
i n
n o t
f e d e r a l
w i t h
s t o r e s
l a s t
h a v e
i n
i n c h e s
o n e
o p p o n e n t s
s a m e
i n d i v i d u a l
b u t
h e l p
s k i n n y
t h e
t w o
s c h o o l
t r a i n
i n
t o
c l i n t o n
f i v e
g i v e n
t h e
f o r
b u t
c h a l l e n g e d
t o
t h e
h a d
t h e i r
y o u
t e x a s
w i t h
y o u
g r o u p
o f
b u s i n e s s
w o u l d
p r i c e
w h i c h
a n d
y o u n g
t o o k
w i t h
i n
o f
t h e
s h e
f o r
s i m p l e
t h e
t h a t
a l r e a d y
t h o u g h t
h e
b e
u n i o n
t h e
v i c t i m s
b e h i n d
f o r
c a n
h i g h
t h e
c h i l d
h a v e
h a s
t h a t
h a v e
w i t h
l o u i s
t h e i r
a n d
t h e
b o t h
w i t h
i s
i n
p r e s e n t
t h e
g a m e
o f
w h e n
t o
a n d
a t
w h a t
o f
i s
h a s
t h a t
w h e n
h a s
i n
b o t h
n o t
c a n n o t
e y e s
t h e
p u t
t h e
m i s t a k e
b e l i e v e d
t o
h e l p
o n l y
t h e
i n
s o m e
t o
i t s
c r i t i c s
t i m e
o f
a
t a k e
w a s
a n d
d o z e n
h a s
h a s
w i l l
s t o r y
h a s
n e v e r t h e l e s s
s a n t a
a c t u a l l y
t w o
o f
a b o u t
s a i d
s i n c e
w h i c h
c h i l d
t h a t
t h e
i t
m a k e
p r e v e n t s
i s s u e d
f o r
c h i e f
a t
o r g a n i z a t i o n s
s a y s
h i s
c h a i r m a n
p a r k i n g
s e v e r a l
t o
o f
l o s t
i n d i v i d u a l
a n d
w h a t
t h e
t h e
p o p u l a r
a l w a y s
b u t t e r
h o u s e
l e a g u e
w a s
h a r d
f r i e n d
w i t h
t o
a
b a c k g r o u n d s
d e p a r t m e n t
s e e
o f f i c i a l s
o f
y o u
m o r e
s u r e
s t e p s
o f
t h e
r e l a t i v e l y
y o u
f o r
h a v e
i n
g e n e r a l
o c t o b e r
t w o
w i t h
w a s
w h o
w a s
o f
s a i d
t h a t
s o m e
t o
i n
a
s a i d
f o r
t h e
s e e
o f
h a s
f o r
t h e
t o
a l s o
p a r t n e r s h i p
h a s
t h e
w i t h
t h a t
s p e c i a l i z e s
a n d
p r o p o s a l s
s u r e
a p p r o v a l
s e e i n g
a n d
s a y
t h e
y o u n g
o f
y o u
s a m p l e
t h i n g s
s e a r c h
h a v e
s h o u l d
o f
k n o w n
k n o w n
a n y o n e
t o
t h e
t h a t
g e t
b e
c a n
s a i d
s o u r c e s
a i d s
w e r e
f o r
r o l e
t o
t h a t
i n
i n
a
t h e y
j u s t
o f
b a d l y
r i g h t
h i s
t o
i n
n e w s
w h o
w e l l
o f
s h o w
n e a r l y
f o r
i t
a n d
r e p u b l i c a n
t h e
f o r
w o u l d
s o m e t h i n g
t h e
f a s t e r
g e t s
a n d
n e w s p a p e r
a s k e d
t h e
t h e
c o m f o r t a b l e
s o m e t h i n g
s h o u l d
o f
t h e
l a s t
t h a t
h u s b a n d
t h e y
t o
c o u l d
r o l e
a t l a n t a
t o
t h o u g h
a g e n c y
o f
c a n
i n
t h e
o f
t r u t h
o f
p o l i c e
w i d e l y
w h a t
w a s
f o r
s o u g h t
t o
t h e
t o l d
a t
e s t i m a t e d
a n d
a m o n g
o f
b y
t h e
y o u
i l l i n o i s
a t
d a t e s
t h e
b y
c o n s i d e r
p l a y e r s
r o o m
s h e
t o
t h a t
f r o m
a n d
o f
h e
e x p e r t s
n e w s p a p e r
c o u l d
s h e
i n
n a t i o n a l
c o n c e r n
b e
t o
j e r r y
h i s t o r y
b y
c o m p a n y
s h o u l d
s t a t e
t h e
t h e
a
i n
h a d
f e w
w h o
a n d
a s k e d
f o u n d i n g
i n
t h e
o n e
f o r
e n d
w h o
s c h o o l
c i r c u m s t a n c e s
b y
w o u l d
t o o k
h e
m e t s
a n y m o r e
t o
t e l e v i s i o n
s h o u l d
c o n t e s t
w a s
t h e r e
o f
c a l l e d
l a s t
r e p o r t e d
c l e a r l y
t o
t h e
t h e
j u s t
s e n i o r
b u i l d i n g
f r a n c h i s e
t h e
e r i c
j u s t
t h e y
t o
u s i n g
w h i t e
b e
t h e
f o r
s l i g h t l y
t h e r e
i n
t o
u n t i l
a n d
w o u l d
o u t
a b o u t
o n l y
i n
s a y i n g
b i l l
s t o r y
t h e
t h e
t h e
o f
n o t
o f
w e l l
s a i d
w o r k
w i l l
o f
a
i n v e s t m e n t s
l e t
w a s
n o t
l a s t
a t
i n
f r o m
c l a s s
f r o m
t h e
s t i l l
a t
j o h n
i n c l u d i n g
c a n a d a
f l e d
t h e
o f
s a i d
l a s t
m o s t
o f
w h o
t h e
t o
r e f u g e e s
n i c k
e n o u g h
n e x t
t h e r e
d o e s
e f f e c t s
t o
c o u l d
h a v e
b y
t o
w a s
u n d e r
t o
a
m a r k e t i n g
s a i d
w a s
k i n d
o f
t h e
s e v e r a l
d i f f e r e n c e
c o m p e t i t i o n
a n d
t h e
p l a n n e d
o f
e x p e c t e d
c o a c h
w o r k
c o u l d
f e d e r a l
t h e
w o u l d
i n d i a n
a n d
t h e
m o r e
p e r c e n t
b r o w n
s o m e
t e c h n i q u e
h o m e s
a
e x a c t l y
h a s
t o
h a s
a n y o n e
s t o r e s
a t
b y
s c o r e d
a n d
a n d
m o s t
t h e
s a i d
o f
g o v e r n m e n t
f o r
d e t a i l s
r e c e n t
a
p l a y e r s
a n d
b i g
c o m m u n i t y
f r i d a y
a
a
i n c l u d i n g
r e s o l u t i o n
w h o l e
b e g a n
p o t e n t i a l l y
w h a t
t i m e
d e a d l i n e
r u l e
t h e
t h e
t h e
o f f i c i a l s
t h e
h a s
t h e
i n
t h e y
a
w h o s e
h o w
s h e
h e l p
y o u
y o u
w i l l
i n
a t
w a s
n e w s
t h e
w a n t
a t
a n d
t h e
h a s
c u r r e n t
w a r n i n g
l a s t
r o m a r i o
t h e
t h e
i s
t h e
i n
w e r e
t o
c a u s e s
h i s
c o u l d
a n d
w i t h
h a v e
a c t u a l l y
i n
s a i d
t o
t r y i n g
w h i t e
s e r v e d
t h e
b y
t o
o f f i c e
j u s t
w i t h
c o a c h
b i g
s a y s
n a t i o n
t h e
i s
j a m e s
t h e
t r i a l
t h e
s e v e r a l
a r o u n d
h a v e
f o r
c h i n a
t h e
t h e r e
h i s
t h e y
a c t u a l l y
a n d
m o r e
b u i l d i n g
d e p a r t m e n t
e v e n
a
e v i d e n c e
e u r o p e
s a i d
i n
r e s t
h a l f
t h a t
t h e r e
o f
b y
i s
w a s
m a y
t h e
s h o o t i n g
a n d
b i d d i n g
h e
w a s
a s
o f
t o
h a v e
t h e
h i s
b e g i n n i n g
o f
t h a t
t h e
t h e
w i l l
m a d e
c o o p e r a t i o n
w r i t t e n
b y
t h e
a r o u n d
d e p a r t m e n t
t h e
t i m e
t o
m o r e
t h e
t h e
c o m f o r t
b u t
t o
s a i d
t h e i r
h a s
a
t h e
y o u
t h i n g s
c o u l d
f o r
a n d
w i t h
s h e
h e r e
a n d
t h e r e
t a k i n g
w a s
s t i l l
t h a t
i n
f o r
t h e
a n d
b e t w e e n
p e r s o n
a n d
u n t i l
i n
t h a t
c a n
o f
c r e a t i n g
h o w e v e r
c a l l e d
n o r t h e r n
c o u l d
i n
t h e
b o t h
o f
l i s t e d
w i l l
a n d
o f
a n d
t h a t
a n d
c h r i s t o p h e r
a n
f r a n k
s e n a t o r
t w o
w a s
h a v e
t h e
e v e n
p l a y e r s
w o u l d
o f
n e x t
s a i d
o f
w h a t
w i t h
a s
y o u
p o w e r
t h e
n a t i o n
l e v e l
r a n g e r s
h a v e
f o r
t h e
t h u s
a
t h e
t h e y
h a v i n g
c o n f e r e n c e
t h e
b u t
b u t
m o r e
t h e y
n e x t
i n
t h e
a s
m e m b e r
t h a t
c i t y
a n d
c l i n t o n
i s
f u t u r e
b e e n
w i l l
e m p l o y e e s
i t s
a
t h e
n e e d
f i e l d s
a
s a i d
b e c a u s e
d e p a r t m e n t
t o
l a s t
w h i c h
t h e
o f
f r o m
s c e n e
t h e
o f
c o u l d
h i s
c a n n o t
t h e
i n
a n d
a n d
c o r r u p t i o n
w i t h
d i d
t a k e
w i l l
t u r n e d
r o o m s
a
a n d
s a y s
t h a t
t h e
l o w e r
a l m o s t
t h e
w i t h
t o
j e r s e y
a s
w i t h
b e
w i t h
s h e
w o u l d
s o r t
t h e
w h i c h
m i d d l e
a
a
i n
a
a n
w a s
h e l p
o f
a n d
i n
o f
f o r
w a s
s t o c k
f o r
a n a l y s t s
t h e
n e w s p a p e r
m i l e s
t o
l e g i s l a t i o n
d a y s
t h e
o f
t h a t
t w o
h i s
t h e
t h e
h i s
a n d
s o m e t h i n g
c a s e
w i t h
t h e
b o u t r o s
o u r
d i s p u t e
t h a t
t h e
w i t h
a g a i n s t
d a y s
t h e r e
t h e
o u r
s i g n i f i c a n t
t h e
t h e
i n
t h e
t h e
h a v e
t o
t i m e
i t a l i a n
o f
s a i d
g a r d e n
c a r e
c i t y
i n
t h e r e
t h e y
b e t w e e n
t o
i n
s a i d
b i g
a n d
t h a t
o v e r
w i t h
h a v e
t h e
d r i v e
w o u l d
r e s e a r c h
r a t e
f a c e s
o v e r
a
m a d e
f o r
a n d
w a s
t h e i r
p o l i c e
a n d
m i d d l e
t h e
t h e y
t h e
t a l k
i n t e r n a t i o n a l
g e t
t h e
g e r m a n y
a n d
r i g h t
a f r i c a n
t o
t i m e
o f
a n d
f o r
f o r
f a t h e r
g r e e n
w h e r e a b o u t s
t h i s
r e c a l l e d
i n
t h e
a n d
t h e
a n d
t h e s e
s i x t h
a
s t a t e s
g o i n g
a
w h a t
w o u l d
a n d
o u r
i n
i t
o n e
i t
i t s
s a i d
o f
h a v e
i t
e c o n o m i c
t h e
o f
s h o p
c o m m i s s i o n
a n d
s u f f e r e d
s o n
t h e
w a s
a n d
r a i n
s o m e
h i s
s t a t e s
v o t e s
a n d
t h e
t h r o u g h
b a s i s
a
t h e
h e
t h e
g o v e r n o r
t h i s
s a i d
o f
w h e n
a l s o
b u t
t h a t
i n
s u c h
e m p l o y e e s
h i s
t h e
a n d
a
t i m e
t h e
h o u s e
j u n i o r
o n e
a n d
i s
t h a t
j o h n
a d v i s e r s
t o
b e c a u s e
i n
w h o
r e p r e s e n t a t i v e
f i n i s h
d i n n e r
i t s
a s k e d
s a i d
a n d
d o d g e r s
t h e
b e c a u s e
s c h o o l
o f
w h o
o f
r u n s
o f
t h a t
t h e
l i n e u p
a n d
b o t h
h e
s h o u l d
h e a d
o f
e u r o p e a n
f o r
d e a t h
a n d
i n
t r a n
w o n
o f
t h e
t h e
a n d
t h e
i n
o f
i n
t h e y
m o r e
a d d e d
a b o u t
i m p r o p e r
t h e
i n
f o r
o f
t h e y
g e t
t h e
s a i d
a n d
m a d e
p i c k u p
c a s e
t a k e
c o u p l e
w o u l d
i t
t h e
f i r m
i n
t h a t
m i l l i o n
t h e
s o m e
s o m e
w i t h
t h e
w a s
t h e
b u t
t h i s
t h a t
t o
i n
t h e
h a v e
a b o u t
t h e
e x a m p l e
a n d
c a n
o t h e r
h e
s a i d
w o r k i n g
r e c e n t
c o n t r o l
n e g o t i a t e
i n
s t e p s
h o w
a t
t o
t i m e
t h e
f a r
c l i n t o n
i n s u r e r s
t h e i r
f o r
a p a r t
t h e
a t
o f
h a v e
m a r k e t s
b a s e b a l l
m a d e
b u i l d i n g
a n d
t h i s
a n d
w i t h
t h e
c a n
b r i t i s h
i t
t o
f o r
h o u s e
a t
s a i d
o f
b y
o f
w i l l i a m
b o r d e r
t h e
s i m p l y
t h e
o f
a l o n g
w a s
f o r
o f
t h e
h a s
f o r
w i t h
t r y i n g
s t a t e
o f
m a n y
a
f o r
n e x t
o f
w h i c h
f i v e
a p p e a r e d
g o v e r n m e n t s
t h e
m i c h a e l
l a s t
o n e
w i l l
h e r e
o f
a r r i v e d
s a i d
h a d
t o
o t h e r
e d g e
p l a y e r s
a n d
m a n
t r a i n i n g
b a r r e d
b y
w e r e
o f
t h e
a l t e r n a t i v e
i n
f e b r u a r y
a n d
s t i l l
w h i c h
t h e
a t t e m p t i n g
b e t w e e n
s i m p l y
t h e
y o r k
g r a i n
w i t h
i n
t o
f r i e n d
o f
y o r k
s i n c e
t h e
a f f o r d
t h e
i t
t h e
w o r l d
t o
t h a t
b u t
d r a f t e d
a n d
g o i n g
f u n d
t h e
l a r g e l y
d e v e l o p m e n t
w r i t t e n
t h e i r
i n
p o p u l a r
a
a n d
b a r r y
a n d
t h e
t h e
b y
d i d
m i g h t
t h e
r u n
a n d
i n v e s t i g a t o r s
a n d
t o
t h e
b e
t r a d i n g
o f
c o m p a n i e s
p a r k
w i t h
o f
t o d a y
o t h e r
t h e
t h e
t h e
l e a s t
a n d
t h e
a l s o
t o
h a s
j o b
h i s
i s
t o
n e a r l y
f o r
c a m e
k n o w n
r o l e
a n d
t h e
o f
v e r y
a n d
i t
t o
t h e
i n
a n y w a y
t h e
o f
t h e
a t
s a y i n g
w h i t e
s a i d
i s
i n
b i g
i n
b a d
i n
a
n o t
m g m
n e x t
c o u l d
l e t
i t s
o f
o f f i c e
i n
a n d
o f
m a k e s
o u r
f i r e
c l a s s
w h e n
w i t h
t r y i n g
t h i n g s
a n
c h i l d
a n d
a
o n e
w h o
t o
c l e a r l y
a
a n
m i x
s a y
d a l y
i n
m i l l i o n
w h o
s c o t t
n o t
b a d
t i m e
a n d
a n d
w h o
t h e
s e v e n
t h e
t h e
f o r
a n d
t h a t
k i d s
m a t e r i a l
t h a t
t u r n i n g
f o r
p o v e r t y
w a s
c o p i e s
i n
f o r
a n d
p l a y e r s
r e m e m b e r
g o i n g
t h e y
t o
w i t h
a n d
w h a t
o f f i c e
t h e
c o n v i c t e d
c o m m u n i t y
t h e y
s h e
s a i d
i s
c a n
o f
w h e n
t h e
t h e
h a s
s i t e
u n t i l
h a v e
b y
n e w s
a n d
a
t h e
l a s t
w e e k
f i v e
s a i d
a b o u t
a b o u t
h o u s e
t h e
r i c h a r d
i s
w o n d e r f u l
f e w
o f
s a i d
t h e
b u t
t h e
o u t
t h a t
e l s e
a n d
f o r
h a v e
t h e
t h e
o f
w i t h
i n
m e x i c o
t h u r s d a y
u n d e r
s e n i o r
i s
t h a t
c o u l d
t h e
c h a n g e s
b u t
o f
g e r m a n y
a n d
a t
d i s e a s e
m i l l i o n
c o v e r i n g
o n e
t h a t
p l a y e r s
o f
s a i d
s a y
i n
w i l l i a m
t h e
w e r e
c o u l d
c o n f u s e d
a n d
s a i d
w e r e
a
t o
w a s
o f
i n
t h a t
t o
n o t
t h u s
o f
t h e
l o n g e r
t h e
y o u
w h o
s a m e
w i t h
s i d e
w a s
l i t t l e
e l s e
t h e
s u r e
o f
f o r
t h e
t h e r e
a l t h o u g h
w i t h
o f
t a k i n g
f o r
t h e
t h e
a r t i f a c t s
t h e
y o u
t h e
o f
t h e
t h e
b u t
t h e
a n d
h o w
l o s e
h a v e
s o l i d
t h e
f e w
t h a t
h a v e
c a l l e d
o n e
a t t a c k
a
t h i s
o f
a
a l c o h o l i s m
o f
r o o m
o f
i n
t h e
h a v e
d o e s
b e c a u s e
w o r l d
f o r
o n e
w h e n
u n i o n
a
t h e
d i e d
o f
o f f i c i a l s
t h e
b u t
e m p l o y e e s
a f t e r
t o l d
s o m e
t h e
w a s
t h e
c a n
t h e i r
e a r n i n g s
c l e a r l y
s c o r e
t h e
s o m e
f o r
t h e
t h a t
n o t
o f f i c i a l s
w h e n
t h e
w h e n
i s
t h e
p a n e l
u t i l i t y
s e l l e r s
f o r
m a n y
m a d e
n o t
s p e n t
w e r e
y o r k
a n d
t h i s
t h e
d i d
e a c h
f i n a l l y
a n d
i n
s e v e r a l
b l a c k
a
i t s
a n d
a t
t h a t
s h a r e
t h e
o f
c a l l e d
a
t h e
n e x t
t h e
t h e
b u s i n e s s e s
t h a t
t h e
t h e
w a s
l o c a l
b y
o f
p u b l i c a t i o n
h e
o f
d a y s
r u l i n g
a n d
c a r e
a
a b o u t
c i t y
w i l l
o n e
i n
f o r
h e
w o r t h
s e a t
d e c i s i o n
a n d
b o x
p r o c e s s i n g
h a v e
a n d
i s
t h e r e
t h e
w h e n
w a s
t h a t
t h e
b i l l i o n
s t r i p
p e r c e n t
h a d
t o
l i n g e r i n g
n i g h t
a
t h e
a n d
b u t
i n c l u d i n g
t h e
t h a t
i s s u e
s a y
t o
t o
t o
i n
f o r e i g n
f e w
t h e
w o u l d
f o u n d a t i o n
s e r v e s
t h e
b e
f o r
h a v e
w a s
t h e
a
t h e
i n
o f
d i d
t h e
a n d
t h e
r u n
d e a l
w a s
f o r
a m o n g
h i s
s a i d
t o o k
y o u
t o
a s
y o u
b e t t e r
g i v e n
t h e y
l e a g u e
f o r
m e t s
b o r d e r
s t i l l
s t a t e
g o a l
y o u
w h o s e
y o r k
t h a t
t h a t
e n d
t h r o u g h
a n d
b e
f o r
b u s y
t h e
o n e
t h e
t h e
t h a t
s c h o o l
f o r
o f
o b j e c t
a n d
p e r s o n
s a n
o f
s c i e n c e
t h e i r
i t
t e r m
t h e
l e g i s l a t i v e
a l m o s t
t h e
s a y s
s a i d
g o i n g
t h i s
s c i e n c e
t h e
e f f e c t
w i t h
t h e
b u t
s e a s o n
t r e a t y
d i d
a
t u e s d a y
t h e
t h e
p e n a l t y
t h e
m i l l i o n
p r o s p e c t
o f
o f f i c e
m i g h t
w h a t
f o r
i n
r e m a i n s
d e m o c r a t i c
o f
p i a n i s t
a s i a
w h o
o f
s t a t e
w i t h
c a s e
t h e
u n t i l
p e n t a g o n
t h e
i n
h a s
h a s
t h e
w o u l d
p o o r
a n d
c o n s i d e r
t h e
a u d i e n c e
m a y
t o
e u r o p e
f u t u r e
s u p p o s e d
f o u r t h
p o l i c e
d e f e a t
i n
a
h a s
j u d g e s
b u t
o u r
e a c h
t h e
s a i d
t h e
o f
w e s t e r n
t o
h e
p r e d i c t e d
w o m e n
t h e
s a y
m i l e s
d i f f e r e n t
s h o u l d
i s
c e r t a i n l y
h a s
r e c e i v i n g
c r i t i c s
t o
o f
m a n h a t t a n
p a i d
n o t
s t a t e s
t o
t h e
t u r n e d
h a n g
c a s e
t h e
t h e
w h e n
s a i d
f r o m
b y
l a t e r
s h a r e h o l d e r s
y e l l o w
f o r
p r o b l e m s
m i g h t
f i n a n c e
e n d
t o
p r e s s u r e
t h a t
a p t l y
t h e i r
i n v e s t i g a t o r s
b y
t h e
t u e s d a y
t h e
c o a c h
t h e
s e e
p a r t
b y
t h e
t h e
a b o u t
s a i d
t h e
w i t h
l e g a l
p l a y e r s
w i t h
t h e
w a s
a n d
c a n
d i c t i o n a r y
o f
t w o
t h e
o f
b e n e f i t s
s h o u l d
w h i c h
o n e
c o n t r i b u t i o n
w a s
a n d
a v e n u e
w e a r i n g
g a m e
a n d
p r o g r a m s
a l w a y s
i n
m o s t
f o r
t h e
s u r e
t h e i r
o f
a t t e n d
t h a t
a
w i l l
a l l i e s
r e p o r t s
f o r
r e c e n t
a t
f o r
a g r e e d
r e m e m b e r
t h i s
h a d
t h e
s a i d
p a r t
h i s
t h e
s u c h
t h e
c a r e e r
t h u m b
o v e r
f o r
b e
t h e
i n
r e s e a r c h
t e a m s
w h e n
p a s s i o n a t e
h a n d l e
y o u
h a v e
r u s h
w a n t
e v e n
t h e
i n
a n d
t h e
l o s t
m a d e
n e a r l y
a n
w i t h
t h e
g a m e
i t s
m a p
a n d
s a i d
f o r
a n d
i t
t h e
a g a i n s t
s a i d
t o
p r o p e r t i e s
i n c l u d i n g
o f
s a i d
q u i c k
t o
e x p e c t
a n
t h e
i n
w a s
o f
n o t
t h a t
m a n
a n d
a n d
t h e
a n d
a n d
u n d e r
s y r i a
c a n c e l l e d
f r a g m e n t e d
i s
s u r e
w h o
t h a t
i n
t o
t o
l a s t
s t a t e
t h i s
t h e
t o o k
u n t i l
b e
i n v e s t i g a t o r s
y o u
y o u
p l a s t i c
t h a t
t h e
t i m e
m o o r e
t h e y
i n
p r o m i s e
t h a t
t h e
s e l l
t h e y
c a r e
p a r t
a b l e
o f
t h e y
o f
t h e
t h e
b e
g r a n t
i s
a
t h e
m a d e
b y
t w o
n u t s
c u p s
w o r k
g a m e
o f
t h e
w i t h
w r i t t e n
o f
t o
o f
c o a c h
i t
m a k e
b a n
c o n t r o l s
t h e i r
y o u
a n d
t o
o f
b e
t h e r e
m i g h t
a l t e r n a t i v e
t h e
c o m p a n y
o f
o t h e r
o f
t h e
a s
a n d
a
b y
s p e n d
h a v e
i n
t r a d e
t o
t h e
h e
b u t
a
o n l y
t h i s
o n e
t h e
c h a r l e s
o f
t h e
a n d
f o r
t h e
w i t h
i n
b u t
a n d
i n
t h e
o n e
n o t
f o r
h a v e
w h o
s e n i o r
b o o k
c a n
o f
i n
a n d
i n
a n d
b e g a n
t o
s e t t i n g
o f
s a i d
s t a t e s
t w o
a p a r t m e n t
o f
w o r l d
o f
c l i n t o n
c a s e
f o r
n e e d
p l a c e
s t r e e t s
t o
a n d
i n
t o
t h e
a n d
o f
m o s t
w o r k
s h o w
t h e
k n o w n
k i n g
t h e
m o r e
t h e
o f
t h e
b e
b o t h
w a s
a
e m p l o y e e s
p i n k
t h e
t o
t h e
t h e
o f
f o r
w i t h
g i v e n
t a r g e t s
o f
t o
w i t h
w h o
v e t e r a n
t o
j o b
t o
s h o p
f o r
w a s
a n d
a s
s a y
o f
f e w
p l a y e r s
t h a t
f i n a l l y
o f
w o n
h e
c o r r u p t i o n
s t o c k
r a t e
t h e
t h e
a v a i l a b l e
y o r k
o f
t h a t
a n d
a n
w e r e
o f
s u r e
d a v i d
p l a c e
w h e n
o f
o f
m i l l i o n
c a r e
b e g a n
o f
h i s
t h a t
h a v e
h a v e
c a l l e d
h i m
i n
t h e
i n
s y s t e m s
s e n i o r
a s
t h e
t h e
a s i d e
o f
t h e
n o t
i n
t h a t
f u r t h e r
t r a c k
l i m o u s i n e
b o d y
p u r c h a s e
o f
t o
m i l l i o n
a t
t h e i r
a n d
a
w a n t
l e g i s l a t i o n
t h e y
c o u l d
h e
a n d
f r o m
t h e
l o s t
o f f i c e
o p p o n e n t s
w o u l d
f o r
s a i d
r e s u l t s
y o u
s a i d
d o i n g
i n f i e l d e r
h a d
s a i d
w e r e
i s
t o
r o o m
t h a t
a n d
m a d e
y o u
a n y t h i n g
b y
h o l d s
w h o
f a r
t h e
i n
t w o
a b o u t
t h e
e n d
t h e
h i m
l a s t
a n d
t h a t
f r a n c i s
o f
e v e n
t o o k
a b o u t
y o u
t h e
t h e
f a t
f o r
s c o r e d
t o
w a s
t h e y
t h e
o f
w o r k e r s
w h o
s e v e r a l
w h e t h e r
h e
t h e
s c i e n t i s t s
l o c a l
t o
o n l y
a s
t h e
d i d
a
o f
a n d
s t i l l
r o l e
w a n t
f o r
t h e
e v i d e n c e
c o u n t e r c u l t u r e
h o w e v e r
t h e
a l m o s t
e f f e c t
w i t h
o f
t o
a n d
i t
v i r t u a l l y
o f
b u t
b e c a u s e
s e l l i n g
h e
b y
t h e
t o
o n l y
b u t
t o l d
n e a r b y
w a s h i n g t o n
l e d
l a s t
t h e
t w o
i n
w h i c h
a n d
t h e
h e r e
t h e y
r e f u g e e s
v e r y
l a s t
o f
a l l o w
o n e
t h e
t h e
t h a t
t h e
t o
o t h e r
a n d
s p o k e s m a n
o f
s t a t e s
t h e
n e x t
c o m m i s s i o n
t h e
b r a v e s
b i l l i o n
t h e
b u t
o f
g a m e
h a v e
r e p o r t s
a
b u t
a n d
t o
t h e
m i k e
n o t
r o a d
c h i c k e n
c a l l e d
e x a m i n e
w i t h
w o u l d
h a v e
m e a n w h i l e
t o
t h e
t h e
a n d
o n e
o f
t h e
i n j u r y
c a l l e d
f o r
h i s
o f
r o l e
t h e
f u n d s
m o s t
a n d
m o r e
c a m e r a
o f
m i l k
w o u l d
t h e
f o x
t h e
t h e
d i s a s t e r
w e r e
o f
s e t t i n g
s e r i o u s
o f
b u t
t h e
i t
w h a t
t h e
t h e y
h i m
s u p p o r t e d
t h e
t o
i n
a f t e r
t h e r e
t o
m e a n s
a t
s e a s o n
n i g h t
t o
m a y
t h a t
m a y
i n
h i s
t h e
c o l l i n s
t h e
o u t
b e a n s
t h e i r
a r t i c u l a t e
t h e s e
h a s
y o u
g a m e
h a s
o w n
o u t
e x p e c t
p u t
k e p t
m a y
a f t e r
o u t
e f f o r t s
t a b l e
t e a m s
m a n y
f o r
a l t h o u g h
r e s u l t s
a s
o f
b i g
l e a s t
p a r e n t
w a s
a v e n u e
h a v e
t h e
b o t h
s u r v i v e d
t h e
t h e
d a y s
o u r
h a s
s a i d
t h e
f r o m
o f
b u t
w i t h
f a m i l y
a
t h e y
s t a t e s
t h a t
t h e
f u e l
a s
h a s
d r i n k s
o f
r a i s i n g
o f
o c t o b e r
g e t
a n d
m o r e
a n g e l s
t h e y
l e d
t o
w h o
e n d
d o i n g
t h a t
w a s
s o m e
t h e
s i n c e
t h e
b o t h
a f t e r
w h o
s a i d
s c h o o l
s e e
b o n d
a s
a s
h e l p
o f
n e x t
o f
h a v e
y a n k e e
t h i s
f o r c e
h i s
p a r k
b y
s p o k e s m a n
s a t u r d a y
o f
t h i s
i n
a b o a r d
t h e
o n e
o p p o s e
w h e n
g a r y
t h e
a t
t h u r s d a y
o f
h i s
o f
l e a v e s
t h e
o f
j u s t
t h e
i n
o f
t h e
p o s s i b l e
m o v e
c o u p l e
b o s n i a
a m o n g
p h o t o
j u s t
m o v e
o f
t h e
d i d
w h o
a n d
b o t h
o f
a l s o
a n d
o f
s t r i k e
t r e e
b e c a u s e
g e t
t h i s
a n d
b u t
w o u l d
w h o
w o r k
a n d
t h e
a d m i t t e d
l e o n a r d o
h a v e
e m p l o y e e s
r a t e
w h e n
w o r k
e u r o p e
o n l y
w i t h
k i r b y
s a i d
t h e
s o m e
w o r l d
t h e
g r o u n d s
a n d
t h e
t o
y o u
t h e i r
o u t
h a s
w h i c h
s t i l l
r u n s
i s
t h e
b u t
t h e
t w o
w o m e n
o f
b u t
t h e
i n f o r m a t i o n
w h o s e
t o
t h e y
t h e
t h e r e
c o m p a n i e s
i n
f r o m
t h e
m y t h s
a
c o a c h
f r o m
t h e r e
i t
b e a u t i f u l
t h e
g r a m s
t h e
t o
o u t
a
n o t
s t a r t
o f
d o e s
t h e
s a i d
p r o b a b l y
i n
w h i c h
i n
t o
a n d
g r a n d
b u t
e f f e c t s
t h e
t r i e d
s o u r c e
t h e
a
t h e
a n d
b y
t h a t
t h a t
p o l i t i c a l
h a v e
t o
d e p a r t m e n t
h i s
r e c e i v e d
a t
s a i d
r o u n d
i n
b e
h i s
n a t i o n
w a s
h a i t i
t h o u g h
t h e
t h e
a t
h i s
h e
w a n t
m a r t i n
o f
r e p u b l i c a n
i n
c h a i r m a n
a n d
t h e y
h a v e
t h e
a n d
b i g
o f
a n d
a n d
b u t
s t i l l
e a s t
r a i s i n g
m o s t
t h e
a l w a y s
p r o d u c t i o n
o f
w e r e
m o r e
w i t h
a s
f r o m
t h e
t h a t
t h e
o f
t h e
t h e
s c h o o l
d i f f e r e n c e
s a i d
t o
h i m
a n d
s i m p s o n
c a n
o f
r a c e s
p a r t
h i s
p a r k
w a s
g e t
t a k e
a n d
q u i c k
t o
w h i c h
f o r
c o n n e c t i o n
