# Supplementary material
Source: ML conference proceedings conference paper supplement (https://proceedings.mlr.press/v37/steinhardta15.html)
Supplement: Supplementary file 2 [file steinhardta15-supp.zip › packaged-code/data/char-level/to_txt.py]

f = open('plain.dat', 'r')
g = open('key.dat', 'r')
keys = dict()
for line in g:
  toks = line.rstrip("\n").split()
  keys[int(toks[0])] = toks[2]
for line in f:
  toks = map(int, line.rstrip("\n").split())
  print " ".join([keys[i] for i in toks])
