# Supplementary material
Source: ML conference proceedings conference paper supplement (https://proceedings.mlr.press/v37/steinhardta15.html)
Supplement: Supplementary file 2 [file steinhardta15-supp.zip › packaged-code/data/word-level/cipher.dat]

313 137 80 103 145 
457 247 286 68 211 137 81 421 73 134 457 69 
294 90 421 457 142 383 137 
110 164 229 92 460 80 289 110 63 
367 235 356 364 
75 341 415 90 236 253 211 
137 424 222 433 253 211 
294 90 212 483 383 236 
93 1 457 105 361 211 137 80 457 498 7 110 449 161 398 201 385 20 246 280 
386 260 345 458 134 345 457 159 261 
463 359 421 354 460 23 44 
313 137 80 421 215 
460 23 330 128 
453 260 364 30 457 231 430 8 129 
460 260 398 110 249 147 88 
463 187 87 137 445 
313 460 205 433 98 
453 81 364 73 134 457 88 
454 93 228 182 359 421 432 
460 80 212 483 97 467 
294 90 364 457 290 345 359 137 
471 391 360 30 323 
137 80 203 375 
427 260 345 304 440 462 
253 187 84 345 188 
182 69 383 110 74 
386 354 253 430 368 110 400 345 285 119 346 54 125 
392 430 130 261 392 211 
463 354 253 356 392 211 
253 356 110 162 212 296 
386 260 383 110 130 22 7 392 211 
457 301 356 421 217 203 129 
463 354 386 470 134 189 290 
460 430 471 95 240 135 
462 430 275 382 
463 356 421 432 427 205 117 95 
137 430 110 130 352 261 
386 359 421 354 427 260 345 117 71 240 462 253 211 
182 337 345 94 321 1 412 118 214 159 140 
253 169 90 452 345 308 185 163 245 
182 424 433 288 119 110 362 361 
137 90 7 253 77 137 
463 260 169 288 345 359 462 
253 80 169 56 147 457 318 111 
392 424 179 427 
253 80 45 126 
110 443 74 169 80 45 119 457 449 
386 143 110 375 
253 79 471 320 180 
457 316 356 421 197 44 38 
227 23 487 346 238 
137 356 421 312 95 
346 462 430 100 463 260 345 228 
386 470 476 345 46 59 
460 90 170 345 137 
454 362 93 161 471 32 73 
294 90 171 253 211 
137 272 433 135 8 400 
386 288 137 403 
383 428 462 90 130 257 
267 165 93 148 73 
137 430 364 61 253 211 
473 88 211 39 128 360 108 
235 267 128 192 475 175 350 
253 410 421 359 100 207 37 
182 470 364 462 212 
182 272 359 137 321 
110 375 90 452 300 294 408 
121 90 462 253 305 
137 430 170 297 345 428 253 15 
253 143 110 212 461 
457 25 80 212 392 211 
313 463 35 3 75 417 119 137 
386 35 260 110 63 
137 80 110 130 212 25 
137 90 110 461 97 457 208 
253 80 10 345 285 
93 260 148 345 308 440 287 
361 93 243 73 
463 356 421 260 7 
253 205 260 108 287 22 281 
463 337 345 433 460 253 211 
120 90 134 110 226 147 203 33 
95 74 80 461 345 390 
155 23 154 128 
313 253 79 364 211 2 253 424 422 
463 299 368 345 273 134 440 75 266 
235 14 360 108 
413 128 169 260 398 51 119 387 
313 386 53 260 345 24 457 208 
386 260 262 294 212 
450 314 93 148 345 73 
457 266 90 352 
457 242 90 136 383 365 
463 332 10 345 256 412 25 403 457 451 147 457 47 
182 150 364 433 51 
457 165 356 364 291 73 134 137 378 
230 167 80 192 319 290 
137 139 364 101 462 
100 243 345 73 
154 37 199 341 253 211 
137 87 471 490 279 147 457 381 
462 219 90 457 95 446 383 110 69 134 378 
313 253 169 82 383 98 469 
170 90 348 119 294 213 253 15 
457 318 211 230 295 80 5 
386 222 311 345 285 369 
137 80 477 313 43 12 481 
346 386 470 10 345 72 345 359 462 
89 463 205 421 359 137 253 81 359 137 
457 17 79 345 239 287 
323 430 183 356 364 405 457 133 147 401 108 
207 391 23 446 345 433 30 378 
382 415 75 375 90 345 72 253 211 
253 211 39 128 360 108 346 413 360 333 
313 457 39 14 23 130 352 
182 148 345 359 294 
235 267 14 169 23 45 119 457 449 
463 222 101 345 256 440 110 297 213 149 
346 182 161 345 359 462 
182 23 171 484 
471 279 360 30 147 457 469 
137 80 110 171 422 
463 205 421 359 462 345 135 
113 79 92 457 350 
313 185 245 9 144 376 383 457 63 8 140 
253 222 79 398 392 211 
253 437 143 457 183 269 
457 469 360 345 72 134 174 
386 67 462 7 90 184 385 125 392 211 
463 337 462 139 421 156 142 91 211 
457 165 92 457 86 
313 457 163 491 205 335 19 
457 420 211 457 120 424 433 9 159 268 
457 157 362 243 32 73 
170 368 136 134 494 
294 90 284 147 347 
313 463 359 421 438 462 
346 386 424 304 440 137 
89 427 359 421 101 345 405 457 274 294 90 457 163 427 101 
463 311 345 433 486 345 260 110 231 
137 90 457 439 7 113 79 259 345 457 488 
182 359 421 359 462 440 14 
318 68 93 161 471 32 73 134 457 86 
392 243 345 217 135 498 129 
386 101 345 46 485 345 110 212 181 
386 260 471 289 234 253 211 
182 23 415 59 147 261 
182 187 101 137 345 60 
457 391 360 452 365 
386 359 170 345 71 
427 260 345 179 383 137 
313 463 354 137 80 330 95 
137 80 135 498 213 429 131 147 457 47 
157 453 148 73 
253 430 203 33 17 
253 148 345 217 110 183 
137 81 260 398 110 416 54 
137 90 457 474 442 
462 430 457 95 212 442 462 64 59 147 137 
182 211 182 5 348 478 
137 356 421 8 22 
463 162 162 311 345 256 294 261 
463 354 460 424 433 293 
253 356 421 101 345 31 135 
137 80 364 457 498 7 457 334 79 285 206 385 237 303 
137 90 421 203 375 
253 272 46 330 95 400 345 94 
267 279 147 457 163 116 
253 430 398 130 212 345 428 
460 430 417 460 
460 430 364 110 400 253 211 
253 80 30 126 
157 93 160 497 457 242 367 
463 299 160 411 440 110 334 240 294 403 
462 80 457 8 442 463 492 463 205 359 
253 234 345 419 345 457 158 324 134 378 
8 140 253 80 439 
294 90 364 457 498 7 
463 354 253 35 359 110 212 296 
182 101 345 117 457 227 147 294 
457 329 69 90 452 159 268 
157 93 81 364 73 134 462 
155 139 421 101 137 
313 182 87 471 279 
313 137 80 421 184 
253 205 156 220 1 44 7 321 
386 162 359 421 101 345 458 345 361 
463 35 187 433 476 345 359 457 474 442 321 392 211 
313 462 430 364 189 375 
253 430 169 288 457 227 
392 15 462 392 161 471 54 97 457 191 
253 491 161 110 461 
253 356 364 101 345 217 203 129 
227 147 457 7 457 441 64 115 
457 375 80 143 145 271 
463 288 364 345 354 340 137 
137 108 413 128 
392 424 419 345 467 134 271 
392 79 92 100 457 350 
457 212 483 90 462 463 161 462 400 
182 150 160 419 
253 243 490 73 134 457 469 
415 386 101 345 217 11 
457 242 80 114 345 457 52 
110 357 480 353 440 457 315 
137 139 421 222 341 59 
457 202 90 159 78 
294 90 364 212 383 75 266 
294 424 364 433 212 
457 316 81 364 73 134 275 464 
253 80 51 134 457 474 292 
137 430 187 95 147 207 223 
457 479 260 398 30 
463 332 10 345 359 457 431 296 463 199 359 
346 255 110 456 462 430 203 296 
137 430 110 297 140 346 137 430 7 383 110 405 
386 376 457 270 
386 35 117 137 253 211 
334 93 205 364 433 106 214 365 302 457 344 52 
346 137 80 491 184 
386 424 160 432 110 292 147 236 
182 233 87 287 177 417 
253 430 97 110 352 213 253 211 
253 243 345 117 44 490 73 134 457 183 
457 401 211 182 161 170 345 359 440 137 
37 23 491 457 474 27 95 140 
457 361 430 183 211 
137 80 457 498 289 390 259 119 457 297 140 
137 424 433 275 439 65 147 469 
463 222 260 337 
110 394 69 90 452 159 408 
346 245 211 463 337 462 386 199 341 137 59 
41 359 386 312 110 405 
463 211 463 101 345 438 137 
457 248 360 160 262 321 119 269 
137 150 433 486 345 256 
253 90 457 330 95 155 199 
463 260 421 262 137 253 211 
313 424 182 69 383 287 
463 359 421 260 345 405 
137 430 10 345 72 134 
386 354 462 386 360 130 24 253 211 
455 356 364 291 73 
386 150 359 71 321 
182 432 155 253 90 
253 199 422 427 215 
137 430 364 10 345 433 457 474 
253 79 364 411 172 437 
110 375 90 452 119 340 110 408 
463 161 416 234 253 211 437 
99 284 79 12 33 453 363 
253 211 253 356 364 260 44 490 279 
253 139 100 457 151 37 
253 211 110 197 90 364 339 
463 359 421 354 460 424 433 44 303 253 15 
137 424 72 323 383 412 248 223 
471 350 360 143 
248 128 360 333 
346 463 359 421 354 386 150 
453 288 345 60 71 
427 359 421 101 137 345 451 253 211 
313 460 80 471 142 345 69 
412 39 128 360 333 
457 327 211 471 375 161 398 106 180 
463 187 161 345 217 137 95 466 94 
463 359 421 354 386 260 44 400 95 414 301 211 
463 161 457 489 392 211 
313 386 410 421 31 121 128 354 
253 356 421 359 462 
356 463 46 457 382 329 
463 211 462 345 287 
463 359 421 354 463 199 
386 359 421 101 345 433 457 165 
463 359 421 354 347 424 304 440 71 
110 297 165 77 327 8 268 
463 64 11 119 457 439 313 463 336 31 147 457 261 321 119 457 443 
313 460 430 170 386 199 359 340 137 
182 356 421 217 44 279 
463 161 177 303 
386 161 345 181 321 
236 469 23 446 119 467 1 457 451 147 457 408 
233 77 294 22 
137 80 103 24 313 386 491 64 210 
331 478 23 452 403 457 451 147 457 140 
100 248 161 92 457 350 
457 370 424 433 288 119 110 362 361 
457 56 80 160 477 
313 253 211 137 80 457 484 382 345 359 121 182 356 
463 161 110 400 392 211 
457 361 80 114 345 448 
427 23 10 345 285 369 345 428 
377 437 386 3 476 
462 53 156 7 
386 410 421 228 462 386 356 137 119 457 254 
392 79 160 398 110 194 147 394 
386 260 345 3 184 134 137 
386 312 345 433 232 345 100 
460 430 187 170 427 199 359 340 294 253 211 
457 167 80 114 43 350 
373 93 148 345 217 279 
427 187 410 421 117 462 246 
463 299 398 482 110 400 345 188 443 
137 430 110 352 213 415 
457 247 165 169 143 471 32 183 
253 430 457 431 119 457 34 
462 430 100 386 356 253 211 
463 260 482 427 110 171 304 253 306 
119 467 457 191 152 243 32 73 
463 35 160 195 75 417 119 110 436 49 321 253 211 
412 252 90 5 159 140 383 387 
392 161 471 32 279 
453 356 364 197 457 74 430 129 
463 356 421 63 137 462 290 
463 199 188 440 137 
294 90 421 457 474 334 
164 93 205 364 291 433 106 383 73 
457 296 356 421 8 22 
137 90 110 146 389 253 15 
137 430 364 110 74 442 345 359 
330 110 408 281 253 272 260 492 253 161 262 137 100 
137 80 421 457 382 7 
137 430 170 297 345 428 
367 457 136 205 54 376 457 384 
346 182 260 457 220 
313 182 470 110 334 
487 199 496 457 290 119 294 
346 460 23 246 
415 182 470 57 193 462 430 364 20 
313 182 101 98 
466 391 360 452 345 433 30 378 
463 465 421 363 71 
102 394 407 23 459 457 216 
415 462 430 104 
386 351 343 110 493 267 37 
27 294 90 405 
457 157 176 161 471 32 73 134 457 86 
313 463 101 427 345 432 462 460 430 222 110 400 383 125 
383 457 227 284 137 90 
253 430 110 212 17 346 253 35 46 412 296 
137 80 110 130 212 25 383 428 
253 114 137 59 134 203 498 489 307 
253 81 364 217 135 129 
463 311 345 433 460 346 463 356 364 117 137 
137 356 364 129 457 301 
386 424 260 294 389 377 457 466 261 
313 89 386 260 345 458 345 361 386 35 458 345 361 
137 79 237 295 253 211 
253 90 452 345 433 30 302 271 
471 279 360 30 126 
460 90 151 345 60 71 
463 199 364 233 46 369 
182 243 345 217 98 279 313 211 253 161 364 398 45 
182 205 364 228 2 457 418 77 284 
113 211 457 469 81 433 218 174 
463 311 345 433 284 147 462 
165 93 205 364 433 291 106 383 73 134 457 86 
182 311 137 345 433 466 346 182 424 260 137 
386 299 368 345 359 98 
294 80 170 240 457 479 
346 182 211 427 432 155 386 23 
463 359 421 260 83 417 
462 375 424 433 201 302 365 
457 39 161 92 457 350 
39 223 300 253 80 348 
100 463 101 345 359 90 179 
310 453 360 333 
154 128 360 284 147 457 165 
463 359 421 101 303 
453 497 457 390 313 243 345 217 279 
137 80 255 24 255 182 81 46 
170 90 184 
386 101 294 345 72 
253 211 253 311 137 294 140 
346 386 299 368 39 
346 137 205 285 97 44 133 147 484 
137 90 110 212 181 
182 260 364 262 137 
462 90 130 212 483 383 457 454 128 245 211 
137 80 364 291 432 2 182 356 
182 470 364 10 345 359 137 
294 90 416 34 
313 392 79 471 38 134 457 479 
457 242 424 72 210 78 
463 432 463 410 421 458 369 
248 14 360 30 27 469 440 165 93 
392 90 457 330 442 386 260 
110 489 80 160 477 
460 80 110 249 147 462 392 211 
460 23 222 37 427 199 341 134 
463 354 463 260 110 212 400 345 117 137 
463 160 492 462 137 80 215 180 
457 420 79 243 345 73 134 457 167 
413 238 360 459 457 333 
386 260 345 31 457 265 253 211 
346 392 430 10 345 94 
427 187 143 462 206 
186 430 388 345 467 79 398 22 452 
462 430 257 253 211 
334 93 81 364 217 44 279 
253 161 110 261 63 
346 253 430 10 345 285 210 
463 359 421 354 253 430 457 382 95 
463 332 10 440 75 128 
209 14 260 92 457 350 
457 304 205 160 433 82 110 236 219 
16 267 128 360 333 
463 35 94 345 3 137 10 
463 260 421 262 457 86 180 
463 332 364 10 343 279 
386 222 94 345 54 287 313 253 139 421 312 137 
460 80 471 314 
313 294 90 457 431 7 147 75 266 
386 354 137 430 257 383 189 334 
463 359 421 117 44 98 303 
392 356 364 129 44 425 
463 205 421 162 438 137 
386 150 364 354 462 386 299 143 137 253 211 
392 243 490 73 
155 430 368 457 417 
462 150 54 125 
427 299 368 345 433 325 345 46 210 137 
313 253 211 457 7 79 285 345 405 
253 53 169 388 387 346 347 
137 430 364 457 265 415 
253 62 137 457 159 140 
345 359 212 341 386 312 171 326 
457 395 77 142 323 
144 93 243 345 73 
137 430 257 253 211 
313 227 424 160 458 369 
89 253 199 359 462 253 139 364 312 125 
189 318 80 460 
392 79 398 210 110 249 253 211 
182 101 345 36 428 
463 492 340 137 
313 462 424 405 
203 261 90 352 103 
253 211 463 359 421 432 
463 356 421 67 137 253 211 
467 367 124 457 239 383 98 7 
457 157 362 211 137 161 471 32 73 
455 211 182 63 345 295 457 250 
457 14 260 457 382 345 295 
463 187 101 345 46 134 440 266 
253 79 92 207 350 
427 160 432 155 430 10 345 256 6 
460 90 110 142 383 100 147 125 
457 7 90 415 392 211 
457 303 161 22 398 190 
137 80 421 305 383 
137 430 457 498 7 386 23 476 294 274 59 
463 354 386 199 256 177 263 415 
457 480 356 364 419 110 239 409 73 378 
81 427 101 462 
253 80 51 126 1 203 369 
405 90 284 147 76 430 266 
463 187 354 253 150 260 412 400 
313 457 391 260 364 398 
346 89 427 101 137 463 101 427 345 260 137 
427 410 421 117 462 449 
267 128 81 228 137 90 
457 128 438 405 253 211 
100 16 360 30 
471 293 80 259 214 78 
457 374 424 422 383 39 107 
137 356 421 260 457 474 295 
454 315 53 364 
253 211 469 81 72 
386 260 345 60 462 
137 139 421 181 59 240 462 
294 268 137 430 398 255 212 255 137 430 398 110 22 7 
137 87 471 267 279 
386 101 345 359 462 
227 161 398 461 119 457 56 
463 354 137 90 110 130 212 375 253 211 
182 360 104 
415 462 430 121 137 90 
253 430 368 457 466 228 
457 213 139 364 101 283 
93 205 364 433 106 383 73 291 
386 187 356 421 36 44 147 71 
137 80 110 212 179 
253 199 359 37 386 299 160 262 403 
386 260 421 104 180 
182 305 135 345 273 346 392 148 
383 177 457 405 79 192 285 
313 462 80 203 431 461 
463 299 398 184 134 462 392 211 
386 101 345 433 460 200 137 139 
392 205 364 291 433 106 383 73 
347 356 364 291 73 134 457 26 
182 260 471 490 400 345 295 
182 359 421 312 54 
203 159 60 90 132 
253 311 345 458 345 283 
386 187 101 345 438 457 265 392 211 
462 79 421 222 398 457 449 
386 101 297 478 415 
313 100 386 199 359 90 179 
463 492 386 218 189 33 
294 90 457 296 147 110 165 
386 299 398 210 137 
182 260 110 34 
457 375 80 143 
386 337 383 457 431 392 211 
137 80 421 110 212 442 
462 356 421 8 22 271 
253 87 206 134 462 103 
347 169 15 12 376 
462 430 257 313 137 430 491 214 
457 361 243 43 73 
463 299 161 110 171 266 
182 243 345 217 98 279 
223 77 287 115 
386 341 440 128 
463 356 421 101 345 240 137 392 211 
386 187 359 421 432 180 
21 127 79 305 383 457 74 430 419 313 347 79 148 
20 463 80 486 345 117 137 
209 23 5 383 159 140 
137 79 345 341 59 
89 182 46 137 182 46 137 
267 165 93 243 73 
427 162 46 343 137 
313 463 260 345 432 
135 56 80 160 477 
386 424 94 345 438 462 182 199 
76 80 95 147 207 223 
137 80 457 498 242 96 457 39 484 
253 356 364 432 275 464 
137 80 457 498 261 119 105 276 102 
457 128 101 287 
313 463 311 345 94 
253 169 243 345 129 457 39 14 
460 79 421 398 
457 250 80 30 378 
110 171 454 123 90 42 383 12 266 253 15 
386 312 110 325 165 253 211 
253 79 235 267 238 
182 199 364 359 294 345 125 
99 334 424 188 39 98 263 
253 222 211 253 81 
182 360 345 308 321 126 
313 427 161 345 433 460 
81 427 240 345 73 134 462 
137 430 364 110 416 26 
137 430 215 253 211 
137 430 10 345 260 345 433 462 290 
415 386 101 345 156 110 284 147 137 97 71 
203 464 205 364 433 497 145 271 
462 29 90 415 
203 443 122 90 446 383 294 408 
463 351 59 346 143 428 110 149 
463 359 421 354 137 430 382 
463 356 421 101 137 345 451 240 294 
182 160 87 206 
460 424 433 471 479 
253 243 345 217 44 279 147 457 63 
137 90 110 237 95 
462 430 457 261 386 188 
463 101 345 376 457 308 253 211 
137 430 364 189 34 
386 260 364 262 44 186 303 253 211 
137 80 24 377 457 451 253 211 
286 68 93 243 345 73 
457 178 23 114 345 121 430 10 134 119 457 213 253 211 
427 187 260 345 3 10 
253 161 471 73 134 457 167 
359 182 260 238 147 275 33 
463 187 410 421 67 463 356 462 
463 260 421 411 172 463 299 398 185 91 211 
137 410 421 433 340 95 442 
191 326 169 77 284 
68 93 211 182 205 364 291 73 134 457 63 
253 430 162 98 399 462 
39 267 14 360 51 8 268 
386 260 336 100 189 238 
110 178 301 243 345 73 
182 312 110 296 415 
39 267 128 360 333 
463 332 364 10 345 75 341 415 392 211 
427 187 359 421 432 
137 430 100 284 147 457 261 
313 27 462 463 356 421 354 386 205 72 
137 80 110 212 179 253 211 
457 479 23 457 158 324 457 158 280 346 457 105 298 
463 260 364 262 135 
313 253 368 110 400 346 77 137 
203 327 148 345 73 134 203 464 
253 139 421 33 137 
463 260 170 345 359 440 137 
137 430 110 171 265 415 
137 430 212 345 432 462 
462 139 421 117 137 382 
457 286 68 148 345 73 
386 359 421 101 427 6 
471 95 205 458 11 
253 211 253 53 295 
463 359 421 354 463 199 359 294 253 15 
392 80 300 30 97 110 316 
471 395 161 398 201 302 126 134 275 295 
182 23 284 147 125 100 
386 432 417 90 230 26 
386 23 415 459 189 33 128 
313 463 332 364 457 17 
313 462 90 187 457 307 
135 231 80 108 
155 81 260 492 137 
463 299 222 311 345 438 287 
313 137 356 421 60 460 
182 260 275 33 417 
463 359 421 354 137 430 110 389 
137 430 10 345 156 189 431 261 147 457 140 
137 430 364 212 253 211 
457 179 199 433 143 
253 243 345 129 457 267 102 105 425 
346 20 27 110 141 253 87 119 346 404 
39 487 360 108 
463 354 392 62 137 
392 162 411 110 212 489 
457 295 90 452 345 156 310 107 
121 430 457 375 
462 80 364 457 449 367 
460 80 421 110 249 147 293 
346 253 211 170 
91 139 364 11 462 163 
471 95 80 333 119 462 381 
137 491 90 421 215 
39 326 360 333 
137 430 162 110 297 442 
453 211 95 74 80 51 
427 299 143 110 212 181 
253 356 421 162 217 428 110 400 253 211 
427 410 421 60 6 
313 253 90 211 345 433 
457 39 23 446 345 308 174 
457 165 356 364 291 73 
386 260 364 143 110 466 375 134 294 26 392 211 
313 392 84 345 359 137 100 
253 430 110 129 17 
462 80 364 457 449 294 7 
313 182 150 364 359 294 
386 35 438 121 182 359 
427 432 121 457 483 90 
457 176 183 87 471 490 279 
313 253 79 330 95 
463 67 463 199 491 359 294 
463 410 421 475 457 29 392 306 
392 356 421 260 44 267 279 
227 247 487 359 421 233 94 
182 199 364 463 193 287 
462 290 90 421 460 253 15 
453 497 457 293 
313 137 430 7 345 256 
392 205 364 217 490 279 
460 80 471 312 383 294 
318 79 398 457 389 
294 90 110 352 26 253 211 
392 160 104 
386 359 421 101 71 345 179 
137 80 457 498 397 122 147 44 147 457 358 225 430 231 407 
110 68 229 211 253 161 471 32 279 
463 160 161 345 422 287 119 137 
137 211 137 5 345 295 
462 90 457 227 257 442 253 211 
42 90 75 266 
392 92 204 137 
471 267 38 80 57 30 
137 80 187 20 24 253 211 
253 161 471 73 378 
457 74 430 129 80 421 30 
457 315 211 271 
463 162 410 421 67 137 392 211 
44 256 90 110 212 95 
457 362 161 471 32 38 
110 375 134 2 457 261 150 72 90 452 345 433 201 300 
182 491 31 322 258 
20 253 161 345 405 
387 430 110 416 371 346 427 470 110 416 371 
460 430 471 297 185 
346 386 359 260 110 63 
182 103 260 161 110 171 47 
463 260 421 161 110 400 345 354 340 137 
457 301 243 345 217 490 279 
137 430 7 345 46 59 
392 211 392 81 260 471 490 73 
386 336 346 386 356 421 240 137 253 211 
253 243 490 73 134 457 167 
253 80 437 51 302 453 
460 80 471 290 182 205 422 
177 432 471 267 266 
20 460 150 421 433 110 312 383 186 405 
346 462 430 121 182 356 
98 469 360 452 
427 359 421 162 432 
294 90 121 463 311 
137 80 110 130 212 86 253 211 
420 93 205 364 433 106 383 73 78 
121 80 457 431 284 
182 260 345 179 
386 160 359 392 211 
463 424 94 345 359 75 431 
102 128 169 360 333 
137 80 7 345 419 134 208 
313 392 80 352 
137 80 421 110 237 320 
137 90 383 100 457 128 
39 267 93 23 491 134 122 
346 462 430 364 457 449 
457 176 161 471 32 73 
320 380 23 452 345 308 126 
463 193 287 345 433 325 392 211 
460 80 471 32 73 97 457 318 68 
457 276 205 364 291 433 106 383 73 78 
137 90 421 341 383 428 
463 332 6 345 359 110 296 
253 368 110 416 131 103 
137 430 364 100 336 253 211 
182 299 398 171 345 125 
386 260 457 128 
313 137 80 110 24 261 
463 311 345 438 137 210 
37 205 405 
471 267 279 147 457 5 381 360 482 
386 260 267 234 383 462 253 211 
427 311 345 432 
413 267 370 360 333 
453 260 148 345 73 
182 101 125 345 256 457 429 
457 436 286 68 243 345 73 134 457 86 
386 359 421 101 71 6 
253 491 90 110 194 147 394 
463 359 421 63 345 181 415 
255 22 255 427 256 462 430 457 257 442 
386 432 253 424 3 125 119 457 261 
313 89 427 359 421 427 410 421 256 
460 90 110 212 400 137 90 222 457 449 
253 80 461 119 457 11 147 457 56 
313 460 80 110 120 
462 334 90 452 345 197 12 466 86 134 365 
253 211 457 449 80 319 167 
463 278 359 137 383 457 334 
134 126 253 477 71 
463 199 364 359 294 253 211 
463 354 463 199 359 137 
346 462 430 187 294 408 
253 424 260 110 483 118 378 
392 211 392 161 471 279 
16 128 360 259 333 
460 90 170 463 199 359 392 211 
427 101 345 256 457 144 232 
155 430 159 253 305 
137 430 130 257 345 432 462 
457 391 360 452 300 294 268 
301 391 23 364 452 383 110 268 
137 430 364 222 462 290 
460 430 170 463 199 359 
135 183 87 471 490 279 
463 359 421 101 345 228 463 33 137 
386 23 6 345 54 3 457 236 
39 128 23 108 
386 260 345 475 462 
462 430 457 461 386 311 
182 444 345 260 110 307 
165 93 161 471 267 73 
455 356 364 73 134 457 197 
346 457 213 149 64 
313 462 80 457 389 
463 80 108 119 462 466 253 211 
386 312 345 405 294 
427 260 345 341 110 249 
359 427 101 345 239 134 110 194 147 457 247 52 
463 187 81 421 359 137 
239 89 427 312 54 
39 267 50 484 336 
457 69 79 398 136 383 174 
471 32 69 80 452 
253 356 364 217 203 439 129 
457 88 205 364 433 497 291 440 453 
453 81 217 471 490 279 
460 80 471 236 
110 483 118 90 446 383 365 
137 430 364 339 
471 386 359 421 67 119 71 
391 147 457 174 69 23 452 214 323 
182 260 289 110 212 274 346 182 260 289 110 212 318 
253 330 84 345 54 479 
110 329 69 90 452 159 268 
453 356 364 217 490 279 
253 161 471 466 183 
253 80 30 27 235 223 
253 79 364 62 110 25 294 140 
457 439 346 466 25 90 446 383 174 
457 276 305 119 110 183 
463 354 386 260 345 72 345 376 137 
450 453 148 345 73 134 457 86 
253 243 73 271 
313 294 90 364 457 7 345 46 59 147 457 384 
386 359 364 101 345 438 427 
386 187 359 189 296 
137 430 457 498 7 463 299 262 287 
182 285 383 231 
457 389 79 22 398 397 
95 356 421 46 445 
182 360 171 345 341 440 253 211 
427 35 160 228 121 294 282 356 383 294 191 253 193 448 
463 260 110 22 290 345 458 
460 23 421 246 147 125 
460 430 170 404 383 125 
253 211 253 90 452 11 119 361 159 408 
177 260 404 457 371 
182 360 216 147 457 474 350 
437 182 136 345 341 
460 23 246 147 207 
457 276 211 137 356 364 432 457 74 80 311 
155 430 368 457 395 
460 360 471 267 279 147 457 406 
463 359 421 432 121 427 128 101 
110 229 211 392 81 260 471 73 
313 110 229 356 421 291 419 110 239 409 73 
182 187 216 287 
137 187 80 421 189 292 
110 165 229 81 364 73 134 457 86 
471 375 79 398 143 302 457 361 
427 3 137 319 31 
457 7 345 405 90 415 
313 294 90 421 457 449 
253 148 345 217 44 98 279 
463 288 345 60 313 137 356 421 341 383 457 498 268 
463 150 260 368 206 
182 193 287 364 345 285 11 
462 80 110 212 151 25 
313 182 356 421 60 460 
346 462 90 457 451 147 137 
466 391 360 364 452 403 271 
182 23 452 345 46 275 290 
471 297 469 360 5 
457 165 79 211 457 16 424 433 288 119 110 362 361 
294 90 203 498 213 429 
386 260 345 156 95 261 1 110 7 253 211 
313 89 427 359 421 101 428 427 359 421 101 428 
463 438 294 255 185 
463 101 345 256 253 84 345 256 
457 327 211 137 81 295 
93 243 345 73 345 457 88 
460 80 471 38 134 457 464 147 457 333 128 
346 463 432 75 33 129 
457 157 362 79 243 345 73 
415 462 430 325 
246 326 360 452 345 72 275 395 210 174 
182 100 101 345 179 253 211 
253 87 471 490 279 340 457 42 
460 90 471 312 392 211 
383 415 392 330 84 98 
463 354 246 425 199 359 462 
386 410 421 179 41 170 
313 463 332 162 364 
182 87 471 490 279 340 203 464 
313 182 368 121 182 311 
182 360 421 333 
457 469 205 8 235 223 
182 470 364 110 191 
386 356 421 117 137 
457 191 152 161 471 73 214 78 
267 484 356 421 233 432 294 80 203 466 65 
386 260 345 156 395 
427 260 345 359 352 37 253 211 
95 74 13 345 203 390 
471 264 279 260 398 482 147 457 219 
392 424 359 294 76 
386 337 253 424 433 497 
253 356 364 291 419 110 239 97 457 344 52 
427 260 20 246 297 128 
412 242 80 82 1 457 244 329 
457 283 491 90 421 215 
457 185 80 163 245 
386 101 345 256 100 147 71 
182 161 170 345 359 440 137 
460 430 170 240 137 
463 359 421 101 345 46 343 462 392 211 
462 430 284 147 294 372 
457 165 79 364 201 110 190 496 119 294 26 
253 79 335 130 257 345 457 334 
6 137 430 352 
137 430 121 463 311 253 211 
463 81 421 228 100 147 71 
462 90 110 249 147 417 
93 211 460 80 471 293 323 
457 391 23 452 126 
313 462 430 364 61 
182 205 421 67 137 
253 430 368 462 382 
227 360 30 457 159 292 
346 463 101 345 359 137 321 
182 353 126 
367 471 42 80 259 119 457 423 271 
137 139 421 101 345 458 119 383 428 
457 301 243 345 217 203 129 
427 187 260 345 3 137 10 
137 79 345 433 382 
479 64 345 359 34 
137 430 364 100 212 483 
301 391 360 30 271 
137 430 103 214 345 46 343 462 253 211 
182 187 410 421 46 137 
463 187 337 463 199 72 75 212 188 
253 80 160 145 383 341 
453 161 493 267 279 147 457 381 
463 162 101 345 188 
313 462 80 352 
463 432 253 35 433 460 440 428 
457 301 87 471 267 279 
253 81 364 217 279 340 462 449 
294 80 110 130 257 489 383 428 
462 430 75 466 250 
462 162 80 485 457 208 147 75 56 253 211 
457 371 430 103 
386 150 433 158 
253 161 493 279 
386 410 421 458 76 
453 243 73 
137 430 190 253 211 
346 463 424 117 462 334 
76 462 430 364 457 449 
386 205 421 438 71 
27 457 381 457 157 362 114 485 457 48 
313 460 360 20 246 303 
463 359 421 354 427 312 345 252 137 
275 464 80 364 30 
457 235 360 160 45 119 457 449 
100 457 333 360 201 345 110 316 119 457 423 
313 386 424 179 134 
392 139 421 233 94 
463 150 421 260 411 460 
91 463 354 137 430 187 382 
253 211 294 90 110 7 383 375 
463 222 492 253 81 
253 356 137 134 457 498 94 
313 27 462 137 81 433 103 145 
346 253 35 260 137 
361 93 205 364 433 106 383 73 145 323 
313 137 430 364 457 451 147 75 266 
253 90 446 345 308 185 245 119 467 134 126 
355 79 92 457 86 
313 154 424 364 8 
463 162 359 421 46 137 
427 260 345 359 462 253 211 
427 359 421 260 44 147 207 
294 90 364 189 389 
137 430 364 230 26 382 415 
137 80 421 110 449 147 364 42 
253 243 345 217 490 38 
471 375 79 180 398 9 
253 161 110 212 140 
314 93 205 364 433 106 383 73 
110 361 229 148 345 73 134 457 88 
386 81 421 240 345 136 110 7 1 100 
386 101 345 252 386 23 364 
182 356 364 86 44 303 253 211 
313 182 356 457 130 159 140 
386 260 398 42 383 462 253 211 
300 110 74 356 457 474 
110 68 301 243 345 73 
253 424 260 471 453 363 
412 65 90 446 119 297 55 300 294 268 
313 392 356 421 252 137 
386 359 421 101 283 253 211 
346 463 354 182 424 
463 337 462 463 35 432 
182 304 440 71 440 363 253 211 
313 386 150 421 433 240 294 
463 359 421 438 121 430 483 340 462 
137 90 240 44 34 253 211 
463 101 137 345 433 100 34 
471 395 79 180 398 201 134 462 449 
246 424 169 433 114 271 
498 463 260 345 46 460 253 211 
137 80 240 182 205 421 60 125 
386 64 6 345 438 457 213 429 392 211 
437 427 181 215 
463 161 345 179 383 99 307 
462 430 452 253 211 
471 95 79 497 457 86 
462 465 421 433 339 415 
457 157 176 356 364 73 
457 480 143 471 32 250 
471 469 360 136 383 457 483 
182 77 457 261 97 125 
253 211 471 395 161 398 201 
253 148 345 73 490 134 457 375 
137 272 364 433 382 313 137 430 457 290 463 359 137 
137 211 182 305 345 458 345 21 127 
453 260 92 457 350 
137 430 10 345 54 428 294 268 
89 386 299 368 110 212 496 463 272 458 1 287 
463 150 260 201 457 292 485 
386 492 253 161 110 325 400 345 256 
182 360 103 325 253 211 
427 205 421 438 110 442 
462 430 222 398 457 63 
463 354 440 177 128 137 90 253 211 
253 243 345 197 98 38 
463 187 101 345 433 482 110 400 392 211 
95 402 82 137 110 297 292 
294 74 79 482 110 249 
102 479 360 51 
182 278 156 137 253 211 
424 463 72 134 
386 161 345 46 11 343 137 
463 260 110 416 375 345 117 
471 95 80 291 51 
427 260 345 354 427 199 359 137 
110 131 465 421 405 462 
100 462 90 136 345 405 
313 386 452 462 
137 80 130 325 
182 30 471 279 
313 462 430 364 457 265 
137 100 198 102 309 281 
462 430 364 75 290 
172 437 460 79 398 471 483 97 457 316 
182 360 201 345 110 316 
137 356 421 346 253 62 
386 470 476 189 431 
346 463 332 457 330 95 155 79 421 288 
137 430 10 345 156 309 
294 90 364 110 390 
386 199 364 179 137 253 211 
137 430 187 110 179 
462 430 457 257 442 
394 124 457 86 
457 389 192 79 422 383 110 141 
182 360 110 22 290 97 369 253 211 
463 80 457 498 95 
471 414 375 90 452 294 268 
182 432 457 261 
457 196 466 90 78 
137 139 421 222 341 
463 187 410 421 67 463 62 137 
294 420 410 421 359 43 428 
460 424 433 471 389 440 146 314 
392 81 364 197 490 279 
463 359 421 354 382 415 137 430 457 431 442 383 428 
253 243 345 217 490 279 
386 356 364 438 71 457 229 15 
457 304 80 114 39 309 300 
260 427 262 71 
137 90 452 345 72 377 457 451 147 53 
182 101 457 48 255 284 147 457 423 147 110 29 450 191 
346 462 430 412 389 
471 460 79 421 398 
203 388 424 8 235 223 
457 49 367 79 364 497 457 88 
493 267 425 260 201 175 395 
128 260 193 71 121 80 10 134 
137 161 345 359 440 120 253 211 
457 453 161 471 32 73 
457 316 229 211 253 81 260 471 490 279 126 
460 465 421 433 110 405 
427 187 260 345 433 
463 35 359 121 182 101 
463 35 252 75 431 
313 462 79 364 222 398 457 449 
180 170 79 398 446 
466 391 360 364 452 377 126 
313 386 260 345 72 345 179 
182 228 182 470 364 
463 410 421 73 134 462 
427 470 364 10 345 117 83 417 134 287 
346 462 80 187 8 268 
137 80 110 24 375 
462 79 170 345 359 440 294 
462 430 284 147 137 253 211 
137 80 421 187 110 296 
177 267 37 23 
457 304 80 300 497 302 457 157 165 
367 457 86 80 300 92 302 412 301 
313 463 359 421 260 137 497 
457 86 356 364 217 203 129 
313 460 23 267 303 
182 424 116 235 487 
386 23 42 383 189 29 
450 314 93 161 471 32 73 
346 460 23 479 
102 267 454 370 360 333 119 457 42 
463 187 341 383 71 
463 359 421 354 427 199 359 462 
137 424 433 275 451 
313 462 430 10 345 156 7 
392 465 421 260 345 
457 111 243 345 73 
386 470 364 328 345 46 119 
457 56 80 477 300 
457 333 260 398 201 345 110 316 
137 90 121 137 90 392 211 
182 356 364 432 135 129 
463 240 287 255 110 56 17 
463 67 137 430 110 212 489 392 211 
498 391 23 452 126 
253 80 457 382 74 383 457 296 
313 463 424 364 60 457 237 241 
253 80 51 457 474 292 
386 260 345 256 43 71 
391 360 452 145 126 
110 375 205 433 9 437 
182 299 368 345 240 462 
457 8 95 64 59 235 309 281 
253 243 345 73 134 457 449 
253 15 182 35 94 321 
463 160 492 457 149 81 458 76 
463 162 359 421 354 240 462 253 211 
462 80 235 309 281 
253 205 421 433 106 383 73 271 
313 386 161 110 171 140 
460 90 95 442 462 427 278 432 
182 162 36 137 485 253 211 
457 389 90 364 462 460 430 103 246 128 
110 466 375 79 364 180 398 9 
294 90 457 330 290 345 359 137 
247 286 68 93 243 345 73 134 457 88 
460 90 471 389 253 211 
137 368 428 10 1 457 451 
457 128 353 440 428 253 211 
313 462 199 405 
462 356 364 341 1 100 
462 221 169 81 
420 93 205 421 291 433 106 323 
137 424 433 232 345 448 
121 430 457 389 
386 87 206 42 
462 430 187 457 290 137 90 
392 356 364 101 345 217 135 129 
457 389 90 318 
146 453 205 364 291 433 106 
457 252 278 458 134 
460 430 110 129 383 154 128 
137 53 433 177 292 
462 81 190 457 290 383 362 395 
137 424 433 457 227 257 261 294 268 
457 453 152 211 457 449 90 319 167 
460 430 170 427 199 162 359 
386 311 345 46 345 432 99 267 
203 122 90 319 290 
253 148 345 217 110 120 
386 260 471 38 
460 139 364 260 345 433 
463 187 356 421 432 
346 294 90 457 431 442 386 299 368 
1 294 307 253 35 156 110 349 
386 193 71 386 356 421 101 345 433 344 440 457 118 253 211 
294 79 421 222 398 457 449 
253 77 137 240 110 74 
253 148 345 217 279 
182 356 421 188 99 267 313 209 336 
460 80 471 165 73 134 457 86 
463 356 421 67 253 150 260 411 253 15 
457 466 90 136 383 78 
182 23 10 345 156 137 59 134 428 
392 90 457 371 430 431 337 
462 430 491 75 416 342 
386 23 10 345 256 
463 359 421 354 182 432 
137 90 192 103 145 383 462 
392 211 39 128 161 338 
294 80 245 430 252 
386 94 364 345 359 462 253 211 
180 253 356 364 60 
457 318 79 201 132 345 457 466 
386 23 10 345 438 
20 137 430 110 130 257 242 
457 301 430 129 80 364 259 
463 332 110 453 70 
135 231 79 211 182 67 135 
165 93 260 211 457 406 360 237 
182 360 30 300 
463 101 345 433 185 
392 411 103 212 
253 430 10 345 433 134 203 33 
294 90 364 189 466 131 253 15 
463 356 421 188 95 261 
457 178 92 137 
463 359 421 354 462 334 424 117 137 403 294 334 
182 415 31 227 147 457 21 
463 410 421 46 343 203 56 
386 356 137 134 189 33 
463 67 462 137 424 
463 356 421 260 462 
137 430 398 110 22 292 392 211 
367 182 360 148 
253 356 364 36 457 74 
415 463 260 457 382 345 69 
471 371 311 287 
386 260 471 389 
294 90 364 457 382 442 345 359 253 211 
313 463 359 421 354 463 80 457 330 95 
463 187 311 345 308 287 
253 430 95 147 457 212 128 119 294 261 
331 478 23 446 383 214 159 140 
248 238 360 333 
253 356 421 217 44 490 279 
457 478 23 452 345 181 300 294 408 
137 430 98 147 110 252 
457 466 65 90 134 174 
253 211 471 375 424 433 143 377 437 
137 90 10 345 156 310 309 
253 243 345 129 457 276 
383 428 137 80 75 498 
386 260 421 161 462 180 
457 74 80 201 345 110 373 316 
137 356 421 260 345 433 462 290 
457 469 169 116 355 387 346 21 127 
427 35 117 203 292 
457 122 90 452 345 433 232 345 457 269 
495 127 79 180 345 181 341 
313 450 93 92 294 
463 356 421 67 137 80 119 
137 139 421 359 83 383 428 
182 23 10 345 54 
346 463 143 206 177 7 
457 420 243 32 73 271 
253 211 110 375 81 433 143 126 
463 332 10 345 433 352 
313 392 211 144 93 193 71 126 462 137 81 364 
246 64 440 275 238 
182 23 328 345 69 
457 301 161 471 267 279 
137 81 421 217 44 267 279 
182 150 260 110 212 7 
463 354 137 90 7 253 404 
279 23 345 433 30 323 
391 360 364 452 403 78 
457 391 360 30 78 
182 150 94 345 54 427 
463 101 345 72 
386 101 345 46 119 346 46 59 
463 354 457 484 432 462 
110 394 69 90 452 159 268 
460 80 471 38 
110 250 90 452 159 408 
137 79 345 433 189 221 253 211 
253 79 160 398 110 389 
294 90 457 431 25 147 75 266 457 454 211 
462 430 457 8 442 386 312 
235 370 360 169 333 
463 311 345 156 457 400 200 463 368 137 
246 23 134 457 422 
98 469 23 452 
137 430 364 10 345 433 110 416 304 253 211 
463 205 160 458 11 392 211 
362 93 356 364 73 134 207 88 
457 498 7 80 8 408 
463 161 177 7 440 457 231 
457 74 80 201 345 457 373 316 
102 479 338 300 119 316 
457 330 442 415 90 345 433 212 
462 430 222 398 203 296 
463 311 345 179 134 
110 231 229 161 471 32 73 
294 90 110 171 171 123 
253 162 79 471 267 290 345 422 383 327 
462 430 364 318 
102 380 260 398 51 
463 492 137 80 110 171 131 383 428 76 
132 62 462 95 
453 259 174 
427 187 260 345 304 440 137 
137 430 457 431 318 
346 253 143 102 147 71 
313 462 430 457 449 
134 462 292 462 430 121 137 77 253 211 
137 430 130 454 
462 430 110 130 257 342 
437 386 260 345 46 137 
294 424 72 
253 80 201 345 457 316 
463 337 463 199 46 254 462 95 
137 80 457 431 65 147 457 179 
427 199 438 215 457 8 493 107 
8 140 253 80 443 
121 90 227 257 345 427 
457 219 80 9 365 
319 457 63 414 280 424 
253 173 95 342 346 136 206 412 378 
89 253 84 345 256 253 35 260 345 179 253 15 
462 205 433 412 322 309 253 211 
463 187 359 421 25 240 462 
462 430 255 24 255 253 368 
110 439 74 80 333 
386 260 110 162 212 400 
182 23 396 345 260 338 498 
27 187 16 309 147 236 182 311 471 98 283 
182 311 203 56 392 211 
100 102 260 92 457 350 
415 463 67 71 
137 356 421 8 22 365 
313 462 80 255 24 255 253 368 
463 465 421 162 239 137 110 25 
460 90 170 463 410 421 359 
313 462 430 383 159 268 
457 111 148 345 217 490 279 
437 137 424 433 215 
392 80 51 214 294 140 
462 122 90 446 345 181 159 408 
313 460 360 177 303 
313 386 470 10 345 179 345 457 390 
110 212 395 461 
463 205 421 67 137 80 215 
463 187 101 345 3 10 
313 318 90 189 382 
457 420 82 485 457 304 
1 203 483 118 
313 463 161 345 3 10 
203 449 90 134 295 
471 182 470 364 162 
457 362 148 345 73 134 457 86 
253 79 421 398 45 
427 359 421 217 462 206 
301 469 360 446 345 181 300 
463 161 345 458 383 137 
182 356 421 260 103 
313 271 253 211 253 81 421 
463 81 240 345 433 110 284 147 137 253 211 
463 354 386 23 162 59 147 294 237 389 
463 356 421 359 75 296 
27 110 268 253 80 201 485 266 376 346 338 
457 157 362 497 457 381 
294 90 457 330 142 182 199 359 462 
463 332 364 110 194 147 44 147 71 
95 80 189 484 
386 187 260 421 143 110 375 
462 375 79 364 398 143 253 211 
50 453 81 364 73 
253 148 345 217 44 279 
457 165 243 345 73 134 457 183 
253 278 260 477 137 
415 460 23 235 
182 228 182 356 364 494 275 481 
313 427 199 438 137 97 6 
182 148 490 73 
463 187 432 137 430 7 253 211 
137 430 457 474 119 100 105 425 253 211 
37 162 205 260 398 20 352 383 428 253 306 
463 94 345 433 325 
137 80 171 253 211 
76 253 79 471 337 
182 260 421 398 
460 23 421 246 147 207 
137 90 187 103 214 
314 93 260 148 345 73 
137 430 110 237 26 
313 457 179 80 421 215 
144 93 260 160 497 135 390 
346 182 424 72 
460 80 471 32 73 97 157 41 50 455 
457 449 90 319 295 
457 128 6 360 171 
110 466 69 90 364 452 377 159 268 
462 80 208 417 
386 359 421 432 1 294 307 
313 253 211 457 341 81 421 181 377 159 140 
386 354 386 260 110 212 449 253 211 
253 79 180 345 433 45 
346 182 470 364 204 
355 211 119 110 183 
313 137 430 121 463 359 
347 430 286 68 161 471 32 73 134 457 469 
460 80 471 32 86 134 135 464 
386 199 330 337 182 54 253 211 
253 199 36 44 461 392 211 
457 22 221 90 78 
386 432 462 430 364 61 
110 69 205 433 218 159 268 
89 182 117 137 182 117 137 
310 360 51 
454 81 46 
346 462 430 457 95 442 253 160 311 345 433 
100 294 278 72 253 211 
457 245 282 161 471 32 73 
453 1 457 7 211 137 80 421 
386 260 471 236 241 253 211 
460 360 471 301 88 147 457 242 
386 356 457 382 442 
346 253 211 253 356 
463 359 421 233 432 203 129 
463 354 137 430 10 345 433 24 
460 80 471 389 440 462 294 140 
427 260 345 252 457 128 
386 410 421 46 100 457 290 460 440 294 185 
98 469 360 452 365 
427 260 345 341 415 
253 211 253 81 433 6 
182 299 368 345 156 97 125 
415 392 53 46 135 400 
457 464 90 212 
386 359 421 28 238 
463 299 160 161 137 
189 274 90 222 457 474 253 211 
191 93 63 345 295 
182 470 110 212 334 
182 23 452 345 181 341 365 
313 137 465 421 405 75 266 
89 253 79 421 137 90 110 389 383 287 
460 80 471 32 73 97 457 455 
463 260 421 62 180 253 211 
253 80 201 445 302 453 
462 53 433 457 449 
313 463 35 217 427 121 427 101 
383 457 149 463 356 438 137 
462 430 457 295 
346 337 383 457 431 
294 90 95 253 211 
460 430 170 386 199 359 340 137 
157 346 450 380 360 345 308 323 345 94 345 451 457 42 
253 410 421 117 110 461 
313 460 80 471 293 
189 375 90 462 386 424 364 376 44 320 253 211 
463 354 294 79 222 398 110 284 147 428 
460 80 421 83 7 
100 161 398 461 119 457 56 
463 80 421 95 147 457 130 431 313 463 161 75 109 147 395 
462 38 205 364 291 433 497 
313 463 354 463 199 359 137 
457 122 426 198 126 90 452 345 8 210 271 
460 80 471 32 73 97 123 93 
182 23 446 345 419 323 
463 356 421 46 287 59 
462 430 364 10 345 433 110 389 
346 463 311 345 433 284 147 137 
463 162 240 462 
137 79 345 433 95 147 207 
74 427 410 421 188 440 462 253 211 
134 323 245 161 412 297 55 498 
76 80 421 457 292 
137 430 222 398 240 294 
457 158 324 90 110 194 
462 430 457 290 137 430 398 294 140 
463 359 421 312 345 433 457 70 
313 1 457 474 7 427 410 421 31 128 
453 205 364 433 291 106 383 73 
137 90 100 463 199 359 383 71 
137 199 60 457 236 241 253 211 
154 88 23 284 147 457 374 385 379 253 211 
137 53 433 103 145 
463 77 294 296 251 463 311 345 422 457 34 253 211 
457 362 356 364 217 203 129 
427 312 128 155 240 427 
253 211 253 5 345 72 255 110 194 147 394 
457 63 356 421 341 
346 463 354 462 430 212 
463 410 421 60 71 
313 1 457 451 147 457 292 460 23 39 37 
462 430 100 386 299 368 
182 470 10 345 156 137 345 125 
462 430 452 323 
235 128 360 259 108 
392 411 130 212 
113 90 364 95 147 71 
463 491 260 345 46 153 345 137 
346 182 199 60 137 
253 81 364 197 457 74 430 129 
463 359 421 240 462 265 
189 330 337 415 90 383 457 105 361 253 211 
457 276 143 95 149 
253 187 84 110 256 
401 205 364 433 106 345 73 
471 301 205 433 106 383 73 134 174 430 86 
93 356 364 217 490 279 
294 205 433 203 140 
313 462 205 364 433 497 291 
427 410 421 359 462 
386 101 457 451 147 42 
462 199 156 107 
479 116 387 355 346 21 127 
253 169 79 58 457 144 494 282 
54 90 134 457 290 1 110 120 
457 34 150 181 294 408 
386 470 100 231 6 
209 14 243 345 73 
386 410 421 359 137 134 189 33 253 193 448 
392 430 368 75 69 
253 80 30 310 309 281 
453 211 460 81 433 471 490 395 385 287 
462 90 110 265 463 81 240 345 438 419 
386 359 421 94 345 195 134 110 252 
462 430 100 427 199 359 255 110 17 
253 193 448 365 
346 463 432 457 231 
137 80 364 397 89 253 81 188 134 174 
463 272 364 233 46 345 181 457 159 261 
427 432 457 261 63 
463 354 182 100 101 345 458 
457 361 211 457 167 81 72 
386 312 98 38 253 211 
313 237 376 90 226 
463 101 345 188 174 
275 388 424 8 310 223 
457 293 161 345 60 
294 90 203 316 430 498 289 449 
427 410 421 480 428 
137 79 421 36 428 180 253 211 
386 359 364 260 457 417 253 211 
253 80 110 212 74 392 211 
313 253 169 211 182 150 304 440 457 29 
39 128 360 259 333 
246 211 182 150 260 288 473 
313 170 64 147 137 
457 167 90 491 232 
457 242 424 433 457 498 96 457 39 380 
313 253 356 421 252 206 
137 430 364 121 427 354 
155 90 10 345 60 137 
463 299 397 287 110 22 7 
386 359 421 260 44 267 296 253 211 
137 424 156 310 223 
346 253 79 110 307 
455 148 345 217 98 38 
463 211 462 1 457 181 
98 391 360 452 126 
253 79 364 398 45 119 457 449 
463 161 110 212 261 63 
182 359 421 233 432 428 
253 161 471 98 279 
463 35 260 345 341 134 462 392 211 
457 375 79 398 143 346 182 470 10 
68 93 161 471 73 
457 247 286 68 79 92 457 86 
462 81 405 319 457 297 19 
39 107 300 253 80 108 
386 312 345 60 71 
427 260 345 239 37 302 275 129 
386 432 177 147 275 431 484 
466 391 23 364 452 377 323 
463 150 458 440 137 415 
463 187 101 345 46 177 341 253 211 
457 370 461 346 108 457 74 
137 205 433 457 181 147 110 22 268 
253 222 396 
182 360 136 345 72 365 
463 162 359 421 432 
110 229 383 457 157 176 161 471 73 
457 257 442 90 345 72 134 377 386 46 71 253 211 
253 35 160 405 
128 23 421 10 383 462 
253 356 364 228 155 81 117 289 110 375 
457 176 205 364 433 106 383 73 
137 356 421 76 313 386 299 336 263 145 
137 430 491 110 416 284 147 75 266 
463 161 398 383 110 141 
463 492 463 80 313 463 359 421 432 
137 79 364 9 12 234 
392 148 345 217 135 129 
182 87 471 73 
457 176 161 471 301 73 
386 35 181 110 374 
460 360 471 267 279 
110 69 80 364 452 377 159 268 
253 338 39 107 300 
177 144 418 169 424 433 284 147 462 363 
144 93 81 364 73 134 457 86 
457 165 79 243 345 73 
137 430 187 284 147 189 266 
457 165 229 243 345 73 134 457 86 
100 235 243 73 271 
128 424 376 428 253 193 448 
253 161 345 117 110 375 20 253 356 
463 356 421 240 71 437 346 463 359 421 240 71 415 
137 211 471 490 38 81 433 30 
294 465 421 156 22 
253 205 421 433 98 382 
119 294 457 158 324 161 457 376 147 457 158 280 
471 69 80 452 403 126 
386 187 101 287 345 341 134 110 493 37 
313 457 227 257 442 90 345 181 440 110 256 
253 243 345 73 134 457 267 484 
457 267 39 360 51 
392 81 421 217 203 129 
137 90 10 345 433 110 171 179 
253 465 421 433 30 383 412 268 
457 7 90 364 462 212 383 428 
457 391 360 30 145 126 
187 182 470 10 11 119 110 449 
110 466 375 90 364 452 403 323 
463 272 285 11 177 292 
253 356 421 217 428 44 348 435 
313 386 199 359 37 240 462 
386 23 364 10 11 253 211 
294 90 110 283 215 189 369 
457 417 53 364 433 460 313 457 237 424 278 433 
463 54 71 440 294 
137 430 275 316 
386 368 110 212 252 76 392 211 
8 268 182 492 182 360 24 
457 110 430 260 62 413 147 275 8 248 263 
203 464 80 421 291 397 
135 129 80 364 482 
457 389 90 440 113 
392 161 471 279 340 71 
462 430 457 337 463 260 
463 80 421 255 212 255 463 288 345 433 346 463 80 421 255 212 255 463 311 345 433 253 211 
253 211 413 128 360 108 
463 332 364 10 345 359 462 321 
137 80 364 190 2 253 81 475 122 
253 356 421 197 279 
463 288 321 346 491 356 421 117 137 
346 253 84 345 285 119 440 110 304 415 
420 93 148 345 217 490 279 
437 253 80 124 
462 430 457 8 7 
253 161 471 73 27 457 25 
463 424 364 433 284 147 137 253 211 
462 90 457 26 253 211 
253 243 345 73 134 137 
100 212 37 285 345 230 451 
182 100 260 345 260 110 400 
457 241 90 452 345 156 309 
427 359 421 117 110 388 
471 95 80 51 
415 463 260 457 400 392 211 
386 260 345 359 121 430 382 
110 69 80 452 365 
313 230 301 211 471 95 80 333 
137 424 160 433 240 137 80 
453 356 364 73 134 457 86 
462 80 162 171 
110 165 229 356 364 291 419 110 239 383 73 
457 242 430 398 218 
463 101 345 285 59 147 137 76 
253 139 421 260 137 
463 492 460 81 433 98 
214 391 23 452 323 
392 430 230 301 
463 332 364 457 74 345 117 457 375 
137 430 364 230 26 147 146 314 
230 282 301 211 137 424 364 433 143 269 
386 199 364 458 11 253 15 
457 389 90 95 147 314 253 211 
453 148 345 73 490 
463 160 101 345 285 59 147 110 261 
137 430 110 325 334 
89 182 161 345 359 137 321 182 81 
415 386 359 421 312 71 
386 260 345 94 345 256 457 261 
386 299 398 184 134 294 253 211 
12 466 86 90 452 159 408 
386 35 72 345 341 134 137 
386 470 10 345 256 294 191 
457 402 211 253 424 197 207 88 
253 80 291 51 
294 80 421 189 292 
296 314 90 421 457 330 26 
230 157 80 169 108 
457 159 261 80 24 
463 187 356 421 24 59 457 435 
137 430 110 212 256 383 125 
463 101 345 359 189 284 245 211 
313 177 37 160 405 
313 463 332 153 345 154 37 
462 254 80 187 284 147 457 274 
121 430 352 119 457 112 430 423 
346 137 64 119 95 147 275 227 257 263 
137 81 421 433 212 383 71 
313 253 161 471 267 279 
462 430 251 137 90 203 369 361 
137 90 364 240 462 253 211 
386 368 95 147 71 
466 391 23 452 378 
488 93 205 364 291 433 106 383 73 
137 80 190 462 253 80 421 10 345 117 137 
313 294 424 54 
386 470 364 110 373 165 
253 80 30 248 223 300 
462 430 95 442 463 240 
253 160 336 203 56 
471 157 370 360 259 333 
182 260 421 285 206 440 110 375 253 211 
68 93 205 364 433 106 383 32 73 
253 80 51 271 
386 160 492 386 360 59 147 137 
110 316 229 497 457 390 346 243 345 217 490 279 
466 391 424 433 9 378 
386 360 130 24 
463 205 421 228 137 80 187 412 256 
457 478 23 284 147 457 236 219 
110 375 205 156 107 
457 488 211 
137 356 421 451 460 
462 430 364 10 345 405 253 211 
462 140 392 13 119 135 439 489 
137 430 364 462 182 260 364 398 193 
182 424 101 345 46 110 307 
466 391 23 452 145 378 
460 80 471 417 
137 430 222 339 253 211 
253 80 421 313 137 80 24 
346 177 23 42 11 
182 31 137 100 
110 375 90 452 159 268 
137 79 398 110 22 7 253 211 
137 82 383 230 167 
491 457 185 211 253 492 236 80 339 
253 205 433 30 255 214 255 323 
313 462 80 421 457 449 
462 90 452 345 156 142 159 140 
460 360 471 32 234 345 195 137 11 119 142 
294 334 79 162 285 134 
457 449 90 452 345 458 345 122 214 159 140 
253 80 51 300 
182 150 359 457 382 442 
137 80 364 110 212 7 392 211 
253 143 110 273 346 368 428 
93 5 345 197 209 88 271 
457 334 424 260 457 391 378 
313 386 205 421 3 457 496 
460 360 471 32 279 134 203 464 
137 430 110 375 386 143 
457 231 243 345 73 
462 80 110 171 461 
457 86 205 364 433 291 497 440 455 
235 238 338 
457 158 324 90 364 457 213 
163 80 160 110 389 
253 80 187 103 212 383 428 
462 80 284 147 457 261 
457 164 314 447 90 345 156 206 457 26 159 268 
313 462 80 255 24 255 182 205 46 
463 477 462 59 294 140 
463 332 457 165 253 211 
462 430 457 431 290 345 341 
182 101 137 345 433 212 
462 430 457 451 147 137 
457 238 305 
462 430 275 389 253 211 
386 422 137 255 110 334 
471 95 80 333 119 457 498 494 
415 182 23 110 284 147 457 252 
427 205 46 108 383 462 
386 424 3 137 10 
81 463 359 457 474 
386 35 156 457 307 
455 161 471 38 134 457 276 
386 359 421 312 412 283 
347 90 10 345 433 189 498 60 253 211 
137 79 170 345 359 440 137 
137 80 114 345 457 52 
463 101 345 188 110 212 261 346 252 462 463 199 188 
314 169 90 61 345 433 230 26 
437 182 424 432 
39 128 360 333 119 457 381 
253 81 433 110 22 461 
298 93 81 364 73 255 182 404 457 242 
457 361 449 90 446 345 72 126 
253 79 39 238 
294 90 340 345 405 
463 299 368 110 249 147 417 346 463 101 128 345 438 137 
386 260 110 325 276 415 
313 253 81 421 359 137 383 170 
177 415 341 440 287 
39 370 360 108 
462 430 364 189 304 
460 90 170 253 211 
427 470 364 10 345 256 246 263 240 462 
137 430 283 119 457 279 
313 137 80 421 369 
457 456 148 
313 460 90 222 159 140 
157 93 243 345 73 134 457 86 
427 187 260 345 359 137 
415 460 90 110 241 
462 430 364 10 345 433 457 449 
462 430 121 386 359 
253 143 471 32 73 
253 211 182 260 364 106 110 375 
253 79 92 100 350 385 287 
313 427 299 368 345 359 457 341 
457 254 90 457 254 
137 430 110 34 26 
313 392 87 471 490 279 
177 368 230 214 181 
313 294 90 364 8 140 
457 469 205 156 107 
89 137 430 212 137 430 212 
301 391 360 364 452 377 365 
137 79 160 62 110 261 
89 427 359 421 354 427 199 359 137 427 470 160 10 345 359 137 1 100 
392 15 463 354 182 143 457 382 375 
463 337 137 81 3 206 457 212 341 
462 430 364 75 261 
346 463 353 345 359 137 
471 80 333 119 457 494 
137 81 433 103 214 345 260 110 297 69 
182 260 345 188 110 352 290 
386 23 95 334 346 386 260 95 342 
294 90 257 253 211 
110 450 301 92 457 88 
275 122 90 446 383 159 408 
462 278 433 189 342 
460 90 222 110 389 
185 91 79 353 
182 101 110 261 147 137 
177 359 346 177 359 421 
137 430 364 10 345 433 110 416 304 
457 122 90 452 345 8 110 140 
294 205 156 110 168 309 
457 157 176 92 462 44 147 12 370 80 333 
463 187 356 421 101 345 188 253 211 
392 79 110 266 253 306 
253 79 345 188 110 493 98 263 253 211 
463 491 67 462 386 260 230 257 400 392 211 
16 407 147 457 474 231 360 459 207 333 
137 90 364 110 194 147 457 105 298 
185 91 211 253 218 462 474 337 
346 182 470 382 
463 240 163 245 253 306 
457 301 430 129 79 364 398 30 
457 212 483 90 463 67 189 371 79 100 235 147 154 
182 35 94 321 
75 131 90 275 131 
450 453 243 73 
253 211 253 79 364 143 203 375 
202 391 360 452 323 
95 338 300 119 110 316 
386 337 128 424 72 345 376 125 
437 182 199 256 457 269 430 376 
137 430 364 339 392 211 
81 463 240 345 188 
137 430 103 83 341 
97 460 392 80 369 348 
253 81 421 217 44 32 279 147 457 469 
453 360 437 82 119 
427 359 364 101 478 
39 267 391 351 255 452 
246 366 353 
462 90 457 341 147 189 146 453 
392 430 364 462 22 253 211 
463 356 421 260 83 147 110 400 
313 137 79 421 222 398 240 462 
463 161 471 95 134 428 
137 80 457 439 345 36 457 48 
462 430 121 463 356 
182 351 27 287 
457 74 90 397 255 55 
182 87 471 279 
463 187 161 137 76 
137 430 110 416 213 253 211 
457 439 449 80 259 323 
457 122 198 323 346 90 452 345 8 383 107 
75 417 90 134 287 
20 103 79 457 19 
463 359 421 432 313 463 424 187 432 137 
313 386 359 421 260 457 220 
128 359 421 101 294 
246 356 313 479 356 364 
137 80 240 75 369 
463 356 421 432 121 80 206 
457 265 90 352 415 
460 278 433 110 158 334 457 185 211 
460 90 177 212 483 
427 205 438 110 416 405 119 287 253 211 
137 356 364 129 457 49 
386 470 10 345 433 95 147 457 416 484 
457 478 23 446 383 159 140 
253 81 364 217 206 
137 430 110 420 463 67 119 
253 169 211 253 311 345 117 110 183 
462 90 452 159 408 
137 430 275 290 41 170 392 211 
182 260 368 110 296 345 359 253 211 
471 122 79 398 218 180 
462 430 100 137 81 260 201 
457 185 79 345 117 457 375 
209 360 201 345 110 316 346 360 119 212 464 
182 356 121 80 452 147 71 253 211 
253 243 345 228 98 
479 23 476 345 54 135 
386 161 110 296 345 359 
137 424 433 110 212 489 
462 367 81 433 255 24 255 182 81 46 
137 430 10 369 392 15 
253 430 368 110 400 
463 187 356 421 101 345 285 59 147 457 261 
137 80 364 110 212 422 253 211 
182 410 421 359 294 
177 484 359 313 253 139 421 
137 80 110 212 292 253 211 
121 80 457 267 
457 176 356 421 260 345 494 110 461 
455 161 471 490 279 
386 410 421 458 134 240 462 
40 457 325 350 457 453 70 87 493 279 
386 278 160 217 206 
460 360 471 259 303 
98 293 80 259 271 
457 424 404 135 440 170 
313 462 80 421 457 330 405 
313 386 278 381 
346 137 430 364 233 24 
463 80 364 486 345 359 137 
16 157 370 360 169 108 
392 87 487 457 382 345 69 
457 178 286 68 79 92 457 86 
460 23 20 246 212 484 
469 360 345 72 134 174 
313 462 161 170 345 359 440 137 
463 161 170 345 359 
313 170 90 104 
182 161 471 279 
182 260 345 341 383 137 
479 23 134 275 290 
457 176 243 73 
95 442 90 190 
457 86 205 364 433 291 497 
457 102 360 452 345 433 30 
457 483 80 30 27 457 384 114 323 
364 240 137 80 110 261 
415 460 90 170 
386 359 364 239 383 283 41 293 253 211 
463 354 137 430 110 348 384 389 
386 260 171 484 
463 81 240 110 329 147 75 33 253 306 
386 465 421 46 11 345 457 254 
457 274 139 421 222 341 
392 198 137 248 107 281 
386 356 421 101 345 359 137 
463 337 462 137 139 392 211 
457 49 79 92 457 86 
457 111 87 471 267 279 
457 176 211 137 161 471 73 
463 53 364 240 137 313 479 424 
460 430 471 389 440 462 253 211 
427 100 432 137 192 
392 430 160 398 51 
415 182 470 457 252 
462 430 100 463 299 368 345 228 
457 157 362 356 364 291 73 
182 169 211 253 205 364 341 
460 23 471 128 345 433 262 
89 427 359 462 427 470 10 345 256 
102 128 260 398 51 119 457 167 
457 362 79 148 345 217 279 
313 253 148 345 73 490 134 457 167 
427 368 345 285 345 297 55 
463 81 228 137 430 110 443 283 
16 157 370 169 360 108 
457 86 169 211 
462 131 64 8 140 
137 87 471 267 279 147 457 381 
294 90 187 171 
386 35 94 135 59 
463 187 101 236 383 428 346 383 75 238 
294 90 212 483 383 428 
310 320 93 260 211 182 424 295 457 375 
462 375 90 452 300 294 140 
471 481 360 477 
463 353 440 462 
463 162 240 137 6 
463 356 421 354 137 80 10 345 46 59 
386 356 177 171 37 
457 235 360 51 
267 350 360 452 
137 80 364 189 292 253 211 
386 356 421 432 121 80 10 134 
463 354 253 424 433 
182 81 156 37 97 125 
253 90 452 345 433 30 294 268 
386 260 345 256 294 261 
463 101 345 433 284 147 137 253 211 
463 410 421 117 137 59 
137 430 110 171 142 345 36 
137 356 421 383 287 
460 80 471 32 73 97 450 314 93 
460 23 471 234 345 156 137 115 
463 410 421 60 184 415 
34 278 458 134 
346 463 492 340 71 
457 122 424 72 
182 161 336 275 498 248 263 
182 150 421 285 59 
463 205 364 46 137 59 147 75 56 
346 427 199 433 255 416 255 427 101 345 433 
207 391 23 452 345 156 235 223 
137 430 466 392 211 
253 356 421 260 44 98 279 
119 39 309 460 424 433 471 312 383 454 166 
253 79 398 218 302 450 453 172 78 
462 430 257 383 457 184 128 147 457 371 
110 450 80 108 302 157 494 
457 224 384 80 114 323 
253 356 364 129 44 371 
137 211 322 128 360 333 119 457 406 
137 430 398 171 392 211 
457 374 90 452 345 8 377 457 451 147 53 
110 175 221 80 136 206 383 379 
313 457 327 229 243 345 73 134 462 345 457 344 52 
137 430 240 110 231 194 
386 359 364 432 147 44 289 63 253 211 
100 260 92 457 350 
457 19 90 190 392 211 
248 157 418 346 110 450 360 108 
137 81 260 398 457 443 59 
