# Supplementary material
Source: ML conference proceedings conference paper supplement (https://proceedings.mlr.press/v37/steinhardta15.html)
Supplement: Supplementary file 2 [file steinhardta15-supp.zip › packaged-code/data/word-level/key.dat]

1 387 russia
2 188 play
3 172 since
4 199 can
5 216 accused
6 94 try
7 64 came
8 476 trying
9 343 into
10 245 clinton
11 424 will
12 157 israeli
13 275 their
14 155 who
15 418 troops
16 487 women
17 336 lost
18 281 ago
19 376 support
20 200 when
21 176 army
22 360 were
23 399 than
24 240 like
25 388 visit
26 109 share
27 33 own
28 279 details
29 267 other
30 412 another
31 113 israel
32 321 again
33 7 time
34 408 month
35 69 vote
36 497 confirmed
37 41 or
38 346 and
39 325 strong
40 443 third
41 103 too
42 133 number
43 450 palestinian
44 167 investigation
45 20 so
46 427 you
47 260 have
48 28 use
49 330 only
50 171 great
51 320 party
52 328 allowed
53 126 tuesday
54 446 scheduled
55 60 stop
56 302 by
57 367 however
58 339 possible
59 405 change
60 239 call
61 237 political
62 110 a
63 386 we
64 92 denied
65 419 return
66 282 administration
67 130 very
68 73 comment
69 2 whether
70 480 judge
71 422 run
72 230 an
73 15 added
74 456 director
75 363 force
76 454 american
77 494 fire
78 372 league
79 305 asked
80 469 talks
81 17 coach
82 273 move
83 396 believed
84 415 now
85 111 agency
86 432 know
87 448 reporters
88 404 left
89 1 at
90 327 office
91 86 report
92 460 there
93 166 forces
94 198 began
95 12 its
96 162 really
97 474 same
98 40 despite
99 397 known
100 251 because
101 34 business
102 464 condition
103 337 hope
104 359 do
105 223 days
106 299 've
107 257 important
108 13 fell
109 152 department
110 492 thought
111 153 used
112 488 committee
113 410 ca
114 55 york
115 140 year
116 45 charged
117 416 big
118 442 thing
119 475 face
120 370 soldiers
121 72 continue
122 53 may
123 293 violence
124 288 tried
125 61 likely
126 227 most
127 433 be
128 259 reported
129 211 said
130 290 way
131 356 did
132 313 but
133 93 officials
134 364 not
135 70 chief
136 208 top
137 384 market
138 164 u.n.
139 246 many
140 123 city
141 276 group
142 291 immediately
143 154 these
144 27 after
145 36 hit
146 38 information
147 426 which
148 358 former
149 472 groups
150 394 parliament
151 23 are
152 398 been
153 129 name
154 91 bush
155 4 rose
156 365 thursday
157 374 campaign
158 105 european
159 391 results
160 295 appeal
161 5 planned
162 241 process
163 108 killed
164 191 state
165 389 problem
166 252 show
167 226 high
168 149 record
169 68 ministry
170 362 military
171 174 sunday
172 369 home
173 287 him
174 75 my
175 79 has
176 214 early
177 228 say
178 112 nation
179 182 they
180 106 reached
181 26 issue
182 411 played
183 77 took
184 428 me
185 235 three
186 178 french
187 195 put
188 67 believe
189 134 on
190 473 earlier
191 80 was
192 271 friday
193 353 agreed
194 326 workers
195 14 men
196 83 much
197 11 back
198 486 able
199 121 what
200 104 finished
201 99 each
202 81 would
203 119 in
204 306 says
205 71 them
206 436 russian
207 381 attack
208 127 korea
209 30 released
210 266 life
211 56 head
212 248 six
213 414 eu
214 169 also
215 453 police
216 373 local
217 268 week
218 285 come
219 298 union
220 184 working
221 478 elections
222 88 reports
223 348 free
224 342 goal
225 118 conference
226 201 taken
227 100 all
228 459 among
229 323 monday
230 278 must
231 392 she
232 393 index
233 135 her
234 383 for
235 192 already
236 254 past
237 289 such
238 196 international
239 138 economy
240 255 as
241 479 others
242 294 this
243 283 war
244 156 take
245 485 off
246 209 both
247 219 agreement
248 19 law
249 262 seen
250 161 had
251 452 expected
252 322 10
253 406 attacks
254 59 out
255 347 china
256 57 being
257 457 the
258 54 help
259 296 job
260 261 game
261 58 led
262 96 between
263 375 decision
264 6 here
265 462 that
266 310 several
267 308 meet
268 340 about
269 137 it
270 95 one
271 471 no
272 16 seven
273 160 never
274 190 clear
275 37 things
276 173 scored
277 185 president
278 234 plans
279 423 capital
280 115 down
281 47 season
282 46 get
283 244 white
284 150 should
285 229 spokesman
286 125 us
287 87 gave
288 222 always
289 490 further
290 204 saying
291 382 right
292 380 leaders
293 312 need
294 25 race
295 250 ruling
296 332 'm
297 439 second
298 120 price
299 301 official
300 445 away
301 378 wednesday
302 316 hospital
303 329 house
304 495 north
305 256 win
306 62 won
307 84 wants
308 319 under
309 345 to
310 284 part
311 341 work
312 407 members
313 221 program
314 3 keep
315 181 start
316 143 made
317 238 children
318 482 given
319 458 go
320 31 control
321 429 cup
322 9 announced
323 151 little
324 403 before
325 265 situation
326 52 press
327 303 problems
328 270 opposition
329 425 countries
330 74 man
331 116 include
332 98 more
333 220 power
334 361 court
335 437 then
336 147 of
337 24 close
338 371 country
339 434 nuclear
340 421 n't
341 165 government
342 280 nations
343 42 fighting
344 180 yet
345 395 action
346 430 's
347 89 if
348 496 lead
349 438 see
350 483 news
351 187 just
352 50 british
353 243 declined
354 314 security
355 335 become
356 477 found
357 212 good
358 35 'll
359 344 associated
360 85 during
361 124 rejected
362 101 want
363 468 million
364 324 states
365 49 bank
366 146 national
367 32 immediate
368 447 council
369 307 point
370 144 u.s.
371 409 seeking
372 233 even
373 272 might
374 159 next
375 263 games
376 78 saturday
377 413 five
378 142 place
379 43 without
380 194 member
381 300 later
382 114 closed
383 39 two
384 451 end
385 264 financial
386 317 quoted
387 231 family
388 351 went
389 48 area
390 455 authorities
391 249 lot
392 431 best
393 334 team
394 44 any
395 466 final
396 179 fight
397 489 match
398 269 public
399 402 minister
400 484 players
401 304 deal
402 175 similar
403 163 bill
404 82 called
405 76 today
406 224 stock
407 242 meeting
408 217 give
409 122 trial
410 401 rebels
411 63 plan
412 385 against
413 136 set
414 210 through
415 440 with
416 29 future
417 197 release
418 107 months
419 202 election
420 349 trade
421 168 billion
422 467 washington
423 170 nothing
424 213 world
425 158 united
426 189 our
427 51 arrested
428 177 some
429 400 chance
430 141 while
431 139 does
432 470 're
433 315 companies
434 128 people
435 357 federal
436 338 died
437 461 shot
438 203 his
439 102 four
440 258 percent
441 292 day
442 145 late
443 449 case
444 21 south
445 218 held
446 352 different
447 65 round
448 435 points
449 18 economic
450 390 death
451 498 first
452 186 major
453 10 going
454 481 weapons
455 463 i
456 8 last
457 441 prices
458 253 he
459 236 peace
460 491 still
461 66 shares
462 90 is
463 131 victory
464 493 few
465 420 company
466 417 money
467 247 japanese
468 193 told
469 215 over
470 286 foreign
471 465 wo
472 117 make
473 311 wanted
474 368 got
475 97 from
476 318 defense
477 183 statement
478 366 analysts
479 379 iraq
480 355 japan
481 331 general
482 350 charges
483 354 think
484 132 france
485 206 up
486 232 open
487 377 until
488 274 system
489 22 long
490 444 appeared
491 333 injured
492 309 years
493 207 those
494 225 leader
495 148 refused
496 297 new
497 205 could
498 277 according
