# Supplementary material
Source: ML conference proceedings conference paper supplement (https://proceedings.mlr.press/v37/steinhardta15.html)
Supplement: Supplementary file 2 [file steinhardta15-supp.zip › packaged-code/data/word-level/plain.dat]

455 106 288 473 309 104 269 
203 257 40 260 455 131 340 104 357 
132 63 106 356 62 357 393 336 400 
92 151 271 278 458 129 
455 473 309 2 264 234 62 489 33 
242 115 179 131 
46 22 39 38 46 83 
72 76 191 228 493 163 
231 129 28 11 127 322 374 217 
63 131 257 291 118 458 129 
458 287 271 28 
231 462 214 62 380 336 150 
132 231 431 340 86 265 344 
179 47 309 326 332 
63 104 340 293 62 297 447 
179 79 184 347 179 22 223 
458 202 134 68 189 257 443 
257 186 470 169 129 269 250 271 146 
458 131 340 153 257 158 364 
458 129 62 263 122 134 127 322 487 442 374 217 
458 346 257 291 330 234 257 259 
179 86 13 277 458 468 87 
347 455 104 265 455 4 305 
458 129 89 62 350 225 
92 471 340 127 72 419 441 
458 381 191 209 
458 431 340 96 362 309 408 286 62 164 
63 47 271 210 458 129 
185 29 195 47 214 152 427 
257 465 175 344 309 68 189 257 91 
269 191 62 50 166 
63 47 257 333 458 73 
455 296 453 309 2 458 129 
69 458 191 270 37 134 455 104 340 86 
231 346 351 24 265 
242 462 62 117 181 10 129 
46 106 474 309 401 415 143 275 
271 477 191 251 487 192 
455 103 242 471 340 127 257 443 
269 214 356 265 
46 11 384 485 24 286 
46 122 134 282 30 429 
63 104 340 293 309 244 242 309 334 
63 188 227 265 346 58 458 129 
269 346 152 62 430 
257 44 462 460 453 189 257 299 129 
45 455 497 340 104 265 
231 436 252 105 381 
257 170 64 257 91 
269 346 62 489 162 
92 462 271 293 234 269 
455 202 273 408 485 343 231 129 
63 227 319 414 242 118 
242 175 152 453 189 62 489 33 458 129 
179 47 265 291 
257 33 175 218 309 348 
63 47 309 472 62 401 
234 62 430 458 191 291 
63 471 340 244 265 429 458 468 62 350 225 
38 92 151 278 234 332 
257 241 455 113 340 258 
419 159 151 251 229 
46 358 282 269 197 
246 317 22 437 203 257 211 
257 354 169 175 353 309 68 
92 191 271 279 
240 489 240 46 104 340 483 268 269 269 431 340 218 9 2 
460 269 191 337 
265 346 30 181 
257 185 195 22 427 456 34 
179 131 134 408 28 
269 11 127 257 434 
242 462 174 263 
104 497 134 127 180 234 68 
455 296 453 309 349 269 309 257 384 458 129 
269 122 273 59 
38 63 106 474 309 55 265 
257 29 329 151 444 208 480 38 1 
257 425 364 175 64 257 482 
132 269 191 62 357 441 
242 191 62 117 270 
242 191 30 270 
455 296 203 62 396 415 46 
62 263 191 134 251 324 374 115 
257 433 331 
458 131 134 472 394 68 
455 47 271 170 333 458 468 257 359 326 
179 106 306 185 
458 214 129 458 131 340 362 309 187 438 317 414 438 409 
63 432 453 309 349 242 414 
265 346 67 107 
269 346 62 463 336 227 257 393 
455 110 455 250 173 
14 202 47 110 265 
269 471 340 456 132 265 346 273 152 62 224 
63 11 104 426 392 
493 383 131 340 311 254 
38 63 284 258 205 
383 241 22 163 
45 231 287 184 174 153 
231 191 134 209 
46 47 309 104 62 391 336 275 231 129 
29 136 133 214 353 68 
493 151 234 184 231 129 
179 362 271 310 336 257 459 162 
63 460 401 415 265 
38 92 11 134 127 30 
13 80 22 54 229 
132 257 126 107 118 462 309 282 257 305 
257 285 353 309 408 289 28 
269 202 127 485 309 233 458 129 
269 346 50 309 127 197 264 231 129 
132 269 113 340 127 64 
455 187 173 485 92 
212 352 120 151 163 
63 11 55 242 243 
179 284 340 47 152 316 
63 151 62 393 264 
257 476 169 250 271 367 68 
63 284 340 104 265 
63 47 309 311 269 254 
38 265 346 351 189 257 334 
92 11 127 428 327 458 129 
221 151 357 
455 131 340 362 309 218 458 129 
455 351 362 309 349 173 104 33 
45 63 432 453 309 104 269 
246 151 312 336 257 295 51 
269 11 244 62 430 309 315 469 458 468 87 
347 269 346 496 114 269 346 496 114 
455 129 455 104 340 188 46 
257 409 462 251 309 384 374 217 
257 85 495 309 68 
132 231 129 231 11 134 82 303 
257 91 131 340 177 14 474 257 259 
255 346 470 169 214 250 271 367 68 
455 351 362 309 282 172 
84 269 462 257 97 
246 120 22 145 
455 104 340 47 62 168 
269 191 257 112 346 451 407 
179 244 485 227 174 33 
455 191 340 357 458 129 
455 202 273 68 189 275 24 265 
458 131 340 472 269 189 171 
458 495 309 408 394 29 146 
269 175 271 466 458 129 
257 292 47 62 391 336 466 
257 341 460 175 196 311 309 104 
269 175 134 152 356 
132 265 346 257 130 269 284 127 
14 497 188 242 
63 86 199 458 131 309 426 338 
455 483 269 175 309 127 257 392 441 336 174 210 231 129 
455 104 340 96 24 265 
302 133 250 271 367 68 
299 159 151 134 251 324 257 384 336 257 217 
255 462 62 50 333 
455 96 103 265 191 134 257 443 458 129 
45 46 104 340 47 309 177 269 
269 346 357 309 282 227 336 205 
179 151 351 24 286 
265 462 126 107 
269 497 127 394 42 336 275 
63 483 63 4 104 269 
46 131 340 258 426 317 
455 460 250 62 489 130 309 319 
257 398 175 62 291 309 86 458 129 
63 106 474 309 396 280 309 257 456 369 
458 73 63 362 265 325 309 384 
240 234 184 455 471 340 86 487 455 282 332 28 
487 242 115 265 462 
38 46 113 340 104 269 469 
265 373 127 257 392 130 309 319 2 
242 462 257 392 130 
269 346 152 265 337 
179 227 104 257 97 118 
257 341 202 417 271 289 146 
493 105 122 127 469 
38 242 462 257 49 378 455 4 104 269 
269 191 13 451 407 
45 269 346 351 62 50 118 
269 131 340 408 28 
63 188 179 106 226 269 84 458 129 
455 104 134 362 309 372 483 268 265 458 129 
104 46 483 269 230 127 
458 462 214 251 309 127 36 
455 497 340 282 9 257 397 
179 177 269 346 351 30 259 
46 47 309 472 269 311 458 129 
455 108 9 275 
265 443 462 84 308 160 
455 296 134 453 458 129 
231 131 134 60 215 
132 92 151 62 391 336 28 265 319 9 269 
179 497 340 282 92 
455 110 63 202 305 
395 159 22 251 203 268 62 217 
455 296 134 290 455 284 47 306 257 451 413 
92 191 271 367 68 475 257 410 189 257 253 
63 4 472 62 357 393 
257 21 129 270 43 191 163 
231 131 340 68 189 257 298 
179 22 67 39 16 231 129 
26 457 214 353 
455 113 340 188 455 129 265 
63 4 104 269 458 129 
38 455 483 458 307 309 127 264 
132 458 175 134 152 116 
179 358 127 163 
438 51 84 204 257 221 284 127 445 32 
347 455 305 455 351 373 59 174 153 231 129 
215 287 271 29 28 268 257 443 
271 237 401 191 180 
257 12 21 495 309 68 
257 215 353 309 68 
265 471 340 127 257 443 
63 362 309 314 269 453 
62 35 462 251 192 
13 278 151 134 99 
132 269 358 282 92 
151 63 453 309 319 197 
30 447 336 80 462 54 234 374 34 
92 462 271 378 455 4 134 319 
38 63 104 340 483 265 346 257 130 257 260 284 127 182 
92 462 271 378 24 172 57 
269 11 355 62 51 24 227 257 241 
132 269 346 134 469 344 
84 63 47 309 483 336 257 416 
242 175 152 62 50 115 
257 395 462 189 229 
257 297 389 462 496 61 239 
144 227 269 462 13 19 
428 372 79 234 258 
132 269 346 257 97 119 
455 11 127 271 446 
455 351 497 340 55 
242 330 175 152 414 62 391 
458 250 72 486 334 
455 468 173 179 96 131 
179 483 269 346 423 
369 318 175 316 438 369 
63 230 6 38 6 32 458 468 62 350 225 
458 473 309 86 199 455 110 
269 351 175 309 55 
179 22 134 209 203 486 334 
215 131 134 47 289 28 
63 4 35 205 254 336 90 
455 273 250 309 311 189 265 
231 346 273 453 309 127 257 97 
57 257 25 191 134 379 328 
341 133 353 309 68 189 257 91 
455 86 257 78 84 
132 63 358 244 242 420 394 441 
455 188 265 455 4 305 269 458 129 
132 347 237 62 60 462 316 150 202 35 189 257 181 301 
269 191 340 142 99 69 179 250 152 209 
458 462 134 251 309 315 
458 41 497 119 435 482 
458 131 134 408 394 332 28 
269 462 13 27 263 
63 351 293 428 258 
269 191 257 49 270 455 250 
455 131 340 293 265 
132 265 11 244 428 33 
49 269 462 340 234 233 
265 191 446 
38 458 131 340 197 203 
257 137 191 382 301 
92 191 271 146 268 257 102 336 493 491 
332 28 151 251 374 217 
231 175 152 209 
62 40 83 233 
179 356 269 264 
179 151 327 336 434 
38 131 46 104 265 
257 74 131 134 153 394 336 257 133 203 438 477 
265 191 438 392 429 309 305 189 438 27 
438 409 462 54 309 315 203 122 
347 92 346 62 401 309 127 316 63 358 472 269 
335 269 346 33 234 311 
458 111 309 311 415 270 336 205 
179 202 134 68 289 
92 497 47 152 439 
231 175 340 182 3 257 370 486 
269 346 134 453 309 127 257 97 379 46 
458 57 353 309 153 257 164 
458 214 131 340 177 14 202 127 189 257 393 
231 202 340 408 394 29 28 
269 346 134 385 
132 458 129 458 191 134 257 49 270 309 104 45 
455 351 47 309 282 269 254 
231 131 340 188 269 
257 35 462 251 309 244 378 374 217 
265 346 271 165 458 129 
151 46 453 309 187 265 254 
455 4 177 265 271 270 436 458 468 257 359 326 
465 133 497 134 142 127 180 
132 269 7 415 62 298 
269 346 257 315 336 62 162 
38 265 191 13 27 400 
257 410 129 272 434 22 491 
458 346 134 453 309 59 
455 86 199 455 362 231 129 
458 202 335 127 257 392 330 
92 22 271 434 
269 346 453 309 127 492 
132 270 118 462 274 
455 103 242 11 134 127 111 412 257 459 162 458 468 87 
422 175 495 309 104 242 
458 175 152 427 
132 104 340 188 269 
132 458 353 309 408 394 29 28 
133 497 134 127 180 442 53 234 68 
304 208 462 134 62 380 
215 497 134 127 180 234 68 
84 92 462 62 277 
132 231 131 134 153 173 
269 346 33 309 218 197 231 129 
179 151 8 309 305 
257 236 462 236 458 129 
455 104 340 47 62 391 336 103 291 84 458 129 
265 287 173 257 348 234 357 
76 133 129 179 250 271 146 268 257 222 
347 179 104 340 60 455 47 271 416 
132 63 473 309 305 257 260 
29 364 47 402 278 
269 346 62 489 489 162 
62 341 285 497 134 142 127 180 234 68 
257 466 431 340 319 309 257 400 
43 133 64 257 91 
179 106 152 414 227 493 275 
455 104 340 24 309 218 245 
465 133 497 340 127 180 
269 191 62 50 441 234 184 
455 250 309 319 234 257 437 
38 265 346 134 453 309 59 234 62 489 33 
231 495 309 104 265 
63 362 62 446 424 
455 106 152 145 324 132 242 191 446 
179 209 271 289 146 
92 175 340 152 196 48 234 205 
10 214 202 
255 250 271 367 68 301 
63 47 134 318 485 257 477 129 
84 269 462 167 33 309 244 345 
269 462 33 63 282 372 458 129 
37 46 4 2 257 400 
302 133 353 309 68 
132 269 346 453 309 244 139 418 324 269 4 127 111 
63 432 8 309 305 375 
271 270 175 152 491 203 257 253 
46 104 340 362 309 86 458 129 
92 191 271 367 91 189 257 80 
458 175 134 261 394 336 205 
257 374 91 462 54 309 127 209 301 
269 175 288 152 486 
269 191 209 53 
347 46 104 340 483 46 4 305 92 346 271 369 458 129 
63 47 309 244 257 437 20 63 47 269 
231 129 203 62 477 
458 346 291 485 92 
63 47 309 319 2 
132 455 483 458 191 
458 175 134 152 116 203 257 425 364 
269 346 62 357 315 234 286 
269 346 101 84 
466 113 340 127 64 
458 129 332 28 202 127 209 374 217 
46 202 273 127 249 32 
265 346 137 93 
455 351 131 340 293 309 104 269 
269 346 134 24 63 293 62 496 378 
269 346 257 392 118 234 173 
257 383 47 340 152 116 
132 458 129 458 462 134 453 309 77 257 399 
132 194 131 340 362 309 408 485 257 488 
179 131 340 408 286 28 
299 159 22 134 251 487 381 242 217 
132 265 373 59 324 489 
179 7 309 396 
455 104 340 86 199 257 165 462 
203 1 126 434 104 
458 214 182 234 257 186 366 393 
46 113 340 274 257 140 
438 102 191 340 99 
455 351 316 62 263 
365 133 497 340 127 180 234 68 
455 86 455 47 62 489 130 309 319 
458 462 251 309 160 
257 451 159 151 251 374 217 
269 287 464 29 28 336 257 407 
390 177 92 462 423 179 4 104 
132 458 64 394 263 175 152 316 
460 84 373 134 127 257 33 
179 79 234 438 367 417 
46 497 134 104 332 234 257 140 
347 46 293 258 179 258 
455 250 309 282 111 309 493 275 
257 341 202 340 142 68 189 257 91 
264 151 28 268 205 
257 299 131 134 417 394 29 28 
458 497 134 127 180 234 68 144 257 407 
265 471 340 127 257 443 242 217 
269 131 340 311 264 
132 455 296 453 309 282 236 269 
405 191 62 357 441 458 129 
231 129 231 497 340 68 289 
257 170 64 242 
132 242 407 191 446 
63 104 340 86 14 131 269 
458 129 458 131 340 86 92 191 62 293 
63 22 351 442 458 129 
231 191 209 156 
269 346 351 62 259 458 129 
37 353 309 408 289 28 
63 47 226 189 62 366 165 
227 439 22 437 203 257 211 
265 191 361 301 
179 104 340 362 265 264 
269 346 152 62 489 71 231 129 
347 46 47 317 46 86 
242 462 72 107 33 
455 104 340 349 269 458 129 
29 375 22 54 234 171 
132 269 462 62 294 412 33 
57 80 121 469 139 336 257 28 
265 191 485 38 254 
63 47 309 314 205 254 336 257 150 
269 358 127 357 100 269 358 127 270 338 
269 346 214 257 392 
455 188 257 330 4 104 269 
265 346 257 443 264 
215 353 309 68 309 257 359 326 
242 11 127 257 456 396 458 129 
455 103 309 127 189 257 374 270 
271 253 22 128 
269 202 134 127 291 
458 129 332 28 202 127 209 381 203 257 217 
257 470 169 214 495 68 
269 202 127 13 456 348 336 257 260 
265 330 175 134 152 116 203 257 443 
265 191 310 336 257 411 
455 47 62 391 336 278 458 129 
458 431 340 96 86 
458 462 251 309 160 257 263 
455 296 203 174 338 
63 22 41 337 309 270 30 
43 133 142 64 257 91 
458 346 134 76 
458 17 438 210 92 
265 346 234 46 309 70 
46 497 340 472 269 485 
63 351 47 309 121 309 2 426 97 260 
269 346 62 117 305 234 184 405 
63 106 134 129 63 104 340 188 242 284 273 244 378 
63 351 362 309 121 269 
271 28 22 318 
63 483 63 4 472 269 
242 4 134 121 458 129 
218 38 104 101 
458 497 134 127 180 234 68 376 
132 265 346 257 236 
458 214 191 407 415 341 133 
63 104 340 47 258 
92 462 423 234 286 415 242 341 
493 151 257 126 107 275 
38 428 460 362 309 319 197 
395 159 151 134 251 487 171 
139 434 188 458 175 436 
458 129 179 284 127 
257 241 287 485 
132 269 284 127 62 357 397 
455 362 174 317 309 319 309 484 231 129 
132 458 431 134 362 459 89 394 298 
257 439 22 251 309 127 209 381 53 
271 263 191 316 156 
269 191 438 451 452 78 315 
132 455 11 282 62 145 
257 165 462 466 
179 316 271 398 68 
257 120 22 163 156 
132 269 175 273 316 257 395 
132 455 47 309 472 242 82 
63 284 483 336 257 416 
92 22 271 367 222 336 317 256 491 
38 458 129 282 254 
269 175 144 227 152 272 418 
41 196 191 316 336 269 
458 307 309 127 264 
72 160 462 251 189 257 295 
455 483 63 497 47 306 265 294 
257 419 462 54 234 374 229 
265 346 257 297 270 
265 346 62 489 33 
45 265 113 340 127 257 49 118 63 104 
234 286 179 460 151 39 
227 185 200 189 257 97 33 
269 191 62 243 458 129 
257 21 353 309 68 189 257 91 
271 35 462 251 487 374 217 
246 4 160 171 346 263 
458 191 273 45 291 
242 284 127 13 441 
271 123 191 142 128 
265 346 134 288 58 
455 250 62 50 375 
265 346 257 357 350 
179 246 362 309 349 257 317 
62 370 164 109 285 353 309 68 189 257 91 
45 269 346 288 453 309 127 265 130 
269 346 62 488 63 432 182 227 115 38 269 346 62 488 63 188 203 
46 230 86 199 462 453 189 
179 47 62 50 393 458 129 
231 495 309 408 332 28 
455 273 47 38 455 273 11 
458 250 62 50 260 
38 458 202 340 408 438 153 
126 478 408 233 323 429 
63 106 474 309 104 269 242 115 
63 104 340 47 394 332 466 
370 170 133 214 250 271 367 68 
179 129 179 202 160 
84 269 462 485 309 257 434 336 257 304 309 166 265 179 4 104 257 97 
265 346 62 117 165 458 129 
62 395 263 462 251 374 115 
132 455 296 134 72 299 
28 22 273 209 
227 185 47 377 448 
265 346 199 242 462 
257 80 214 331 1 480 38 444 208 
269 346 152 62 115 458 129 
334 133 353 309 68 289 189 257 443 
257 33 175 71 254 458 129 
269 346 227 257 29 275 265 319 415 269 
269 346 24 46 362 309 282 485 132 46 113 340 
257 277 191 189 33 
63 432 413 485 234 62 96 357 115 
179 47 62 391 336 67 357 400 
63 432 134 453 309 349 269 458 129 
269 191 134 318 309 184 
159 497 244 418 
269 129 28 11 127 209 381 
269 462 251 309 456 227 217 
458 462 251 309 127 198 309 2 32 203 383 418 
179 119 201 29 203 334 381 242 115 
269 346 453 309 258 184 458 129 
269 346 357 309 349 46 32 
458 129 57 265 458 251 72 247 309 127 180 144 257 419 
179 106 17 257 236 272 375 458 131 340 315 
257 51 64 257 482 
38 455 362 174 466 
458 373 351 282 265 429 
458 353 309 408 28 336 257 80 
455 188 242 462 107 
257 470 169 250 271 68 189 257 91 
269 346 152 62 50 217 458 129 
458 250 271 29 146 
46 432 134 453 309 71 173 280 
63 460 47 62 489 130 309 319 
63 473 309 305 257 456 260 38 63 131 
458 353 309 153 257 433 
455 191 8 309 282 40 
132 63 47 309 6 
179 250 439 317 
63 104 340 47 394 332 28 
335 92 346 479 
347 46 104 340 60 269 46 104 340 47 62 429 
257 169 129 269 307 309 
271 455 104 340 483 269 431 
46 351 293 309 104 269 
132 63 4 134 104 269 
257 260 191 404 245 
266 22 317 
269 462 13 338 
139 434 235 47 249 269 
455 4 351 319 38 2 
257 170 129 272 434 22 163 
269 214 129 269 202 47 271 289 68 
458 278 62 350 225 189 192 
29 482 151 251 
63 358 273 408 485 
455 104 340 483 269 11 127 62 489 33 458 129 
269 346 62 496 118 234 184 
455 104 134 293 146 
63 362 271 332 243 
271 343 191 128 53 
271 270 191 491 203 257 207 442 376 
265 346 257 325 
242 33 191 271 446 
269 284 127 62 50 294 
132 462 269 254 336 320 
33 175 134 71 254 
265 122 84 59 
458 436 185 418 381 
92 462 271 153 234 242 
38 265 346 134 67 357 
265 162 462 251 309 127 200 374 115 
231 214 191 371 233 451 424 321 463 
257 207 191 134 128 487 301 
46 235 305 20 46 104 265 
132 455 202 340 127 198 309 320 269 
242 462 257 451 33 265 237 62 407 175 152 486 309 205 
92 346 428 357 350 
199 175 355 336 269 
265 191 487 376 
455 358 293 438 258 
458 460 250 30 429 
455 96 47 309 483 199 346 257 392 118 234 184 
458 473 309 258 205 
455 191 257 491 51 
231 287 271 289 367 28 
231 129 458 278 309 160 
265 462 485 309 173 38 438 317 
269 191 257 451 407 336 257 383 
242 462 257 496 119 336 174 210 458 129 
257 91 287 271 28 336 257 295 
460 458 497 340 2 415 269 
455 250 309 472 62 263 
335 458 73 269 462 62 215 164 
455 131 340 47 394 146 
269 346 62 117 341 
269 202 258 458 129 
458 131 340 47 309 
154 129 458 445 265 97 103 
132 179 460 17 234 257 297 33 203 185 375 
455 483 92 346 103 
269 462 310 336 257 162 
92 151 45 139 29 317 
179 250 152 54 234 417 189 301 
38 265 346 134 62 357 118 
269 346 134 67 274 309 184 458 204 
241 319 372 289 
257 419 462 171 
271 277 346 25 462 453 309 59 265 
455 131 340 362 332 
434 202 47 468 184 
57 458 462 251 309 6 32 374 115 
104 134 417 309 257 326 
242 462 257 325 84 458 129 
383 51 312 436 498 309 257 141 346 285 
63 131 134 408 205 62 429 309 282 9 257 260 
63 106 474 309 472 257 126 336 269 458 129 
269 346 62 496 465 458 129 
92 191 271 68 475 257 444 
63 362 309 55 269 
269 191 62 50 397 458 129 
63 131 340 411 309 472 62 117 401 336 269 458 129 
458 131 199 191 291 
179 151 257 185 93 265 472 257 424 319 447 458 129 
455 103 269 346 257 443 
257 341 163 173 
242 191 62 50 33 234 227 336 286 
257 476 79 234 271 33 
231 250 233 429 189 156 
455 188 265 269 346 257 392 401 63 4 104 
63 106 152 414 265 
179 151 134 52 309 65 172 
458 64 227 257 482 412 173 
62 350 225 191 256 54 234 374 217 
185 241 460 119 409 
46 227 47 309 319 
62 470 169 285 353 68 
132 458 191 41 442 
270 191 475 480 
257 225 94 53 
46 47 340 474 62 429 
63 47 340 17 231 129 
269 497 47 152 96 337 
275 351 131 340 319 426 130 
257 330 191 340 491 
29 375 151 189 
132 462 340 269 257 291 118 309 104 
72 44 462 308 130 
63 104 340 47 309 127 283 
269 191 257 81 346 263 
231 250 271 28 
257 303 403 462 257 97 
269 346 152 62 115 3 455 456 306 
257 338 175 152 203 257 424 141 234 185 492 
242 462 257 392 458 129 
455 214 362 174 387 309 127 88 254 336 242 231 129 
231 306 257 76 321 383 492 18 
455 131 340 47 320 458 129 
231 80 268 184 
458 495 309 68 189 257 295 
458 358 349 345 53 
257 470 169 353 309 68 189 257 222 
455 483 269 346 58 
458 131 340 55 92 
269 250 271 289 68 
231 495 309 127 386 56 153 
455 188 179 151 
455 483 458 346 453 309 282 62 259 
455 497 340 82 89 227 
265 284 134 127 485 309 286 
63 4 227 104 332 
132 269 122 134 311 265 130 
215 129 271 482 22 161 
179 17 190 309 444 208 
257 370 170 131 134 68 142 
132 265 346 134 288 257 443 
269 191 96 62 489 437 
231 307 309 244 189 257 424 
257 21 285 250 271 367 68 156 
257 159 22 209 144 257 137 382 53 
428 460 349 103 
45 458 495 309 2 
257 477 131 134 153 257 465 
215 131 134 417 28 
455 106 474 309 2 62 357 397 
38 63 432 453 309 6 309 472 30 71 242 115 
63 113 340 320 265 
455 106 152 198 309 311 254 
38 179 432 67 357 
269 497 214 127 438 456 
242 462 351 62 260 
38 179 373 47 309 104 269 234 383 332 105 
257 491 22 226 309 62 140 302 
132 257 452 327 151 460 92 
257 341 157 462 309 486 374 217 
38 455 103 269 471 340 127 257 443 
63 47 62 489 130 309 319 
46 11 127 310 336 257 260 
31 346 470 169 353 68 
257 341 79 257 15 234 258 
63 151 8 309 104 426 392 458 129 
269 346 453 309 127 62 50 166 
269 175 129 269 11 244 332 
30 407 191 413 234 156 
212 434 436 265 441 
458 404 234 176 221 
215 128 271 289 28 
46 250 62 429 309 396 
455 104 340 362 309 55 264 
257 170 129 120 131 134 486 77 203 257 389 
458 129 458 202 134 160 
63 432 453 309 127 227 291 
62 164 109 299 129 229 265 257 225 11 319 189 
455 483 268 205 
455 483 265 346 257 130 46 106 474 309 127 
319 282 269 347 46 104 340 47 270 
265 346 62 117 2 455 106 474 309 472 
215 64 242 
265 462 343 234 434 
257 383 497 134 127 180 234 68 
46 47 309 244 493 
30 407 191 413 234 374 217 
231 131 62 50 259 
179 86 63 47 257 333 
246 22 226 309 62 302 
455 60 205 76 
179 47 13 27 75 
151 46 234 220 434 
63 151 453 92 
265 346 257 130 458 473 269 
92 346 423 46 4 104 231 129 
269 431 340 311 254 265 130 
92 346 271 181 336 343 
455 362 309 104 269 231 129 
269 431 340 311 24 265 
269 346 41 176 309 177 
423 462 395 415 205 
132 269 346 310 336 257 260 38 46 47 309 401 415 269 
455 104 340 86 257 153 336 257 330 14 163 173 
347 179 473 309 104 265 179 202 47 427 205 489 18 
460 241 47 382 280 
455 250 309 82 233 451 
269 351 431 340 311 24 265 
455 86 455 47 62 429 
179 11 127 124 381 242 34 
62 35 497 218 381 376 
423 46 4 104 268 269 
269 191 134 274 20 179 436 
269 346 152 270 118 144 30 
455 129 455 104 340 372 86 199 265 191 
458 388 234 438 211 
265 346 96 351 257 130 458 462 
31 202 134 142 68 189 265 91 
458 436 49 62 464 492 18 
458 346 474 62 117 260 
72 247 230 127 356 
458 214 495 309 408 289 28 
257 370 170 64 269 
271 345 175 152 226 189 269 
185 195 47 152 427 
458 353 309 68 289 189 257 181 
38 122 257 424 218 38 258 286 
455 131 340 282 62 429 309 282 265 437 
92 346 62 357 429 336 265 458 129 
271 327 22 128 229 
57 269 131 134 408 394 28 
242 462 453 309 244 62 430 458 129 
257 330 191 228 257 377 434 491 
458 129 269 131 134 
179 362 309 413 286 485 458 129 
132 458 460 306 257 397 
159 22 251 192 
246 195 22 163 
458 495 309 153 257 433 
257 451 270 94 456 156 
455 104 340 483 63 151 453 309 104 265 
458 191 437 203 257 197 
257 126 107 118 462 309 305 92 
92 346 152 62 452 59 
269 346 24 242 458 129 
269 191 13 297 407 242 34 
458 129 257 341 202 160 
38 92 346 271 270 14 4 258 46 254 
63 432 270 117 387 
269 11 214 127 438 456 
422 175 495 
381 257 410 214 404 245 459 80 415 257 341 
275 11 59 374 115 
455 110 242 191 453 309 127 426 115 458 129 
304 208 307 80 415 351 257 425 364 
335 92 11 127 72 419 458 73 
423 284 55 46 
63 47 67 357 400 
347 269 462 350 269 175 309 127 128 458 129 
139 241 47 134 322 13 278 
179 151 460 223 
132 92 151 493 14 104 
179 353 309 408 289 146 
132 455 104 340 349 269 256 62 165 
383 370 120 214 22 491 
458 129 265 394 59 203 394 338 284 218 475 257 434 336 265 338 
242 462 134 496 458 129 
458 129 257 383 11 127 209 
133 497 134 142 127 180 234 28 
324 265 458 191 50 
383 120 22 491 
271 29 28 22 209 
46 151 62 50 21 
257 141 161 309 267 32 192 
179 276 89 11 
458 175 340 468 286 
132 458 129 458 183 233 197 309 257 302 
231 373 47 436 
335 179 22 209 
257 181 462 382 
92 47 288 152 
455 362 309 315 269 469 32 
255 346 470 169 250 271 367 68 
63 113 340 75 62 459 
458 431 340 47 309 305 
227 185 4 160 257 482 
458 353 289 68 
14 202 282 205 
458 462 125 309 127 209 144 252 492 
257 299 287 271 289 28 
46 4 104 265 264 
132 269 346 257 392 
458 191 340 453 254 24 242 
63 362 309 282 257 397 189 
265 346 134 257 130 269 346 453 309 127 
45 92 462 62 489 130 309 319 
257 409 462 251 309 456 383 105 
269 175 134 152 356 458 129 
63 47 62 391 336 446 454 
265 113 340 127 458 204 
63 273 349 394 466 
63 104 340 24 205 
405 63 113 340 104 265 
257 334 495 309 68 
242 462 62 168 234 257 236 464 492 458 129 
257 304 175 64 257 482 
46 47 309 244 310 
46 131 340 319 300 
370 133 47 495 309 68 
455 362 309 127 257 392 203 257 424 
242 191 340 310 336 257 411 
455 471 340 197 280 475 265 
92 151 62 391 336 50 400 
458 4 282 197 9 257 397 
458 129 203 422 
458 191 67 107 309 233 
257 425 364 175 273 306 257 424 321 
269 346 288 152 50 
257 433 57 64 257 91 
335 231 88 286 92 
455 104 340 483 269 431 
269 462 134 58 
271 395 263 175 344 152 316 
335 438 466 94 309 71 254 176 242 281 
265 162 497 244 418 
63 4 311 415 265 
257 465 353 309 68 229 
269 191 134 274 69 31 191 54 309 2 92 
458 462 251 309 65 374 281 
132 269 191 62 337 60 
269 11 127 382 309 87 
265 346 199 179 362 
455 188 63 151 453 309 282 265 247 458 129 
455 96 362 309 86 
265 462 199 455 96 188 
63 106 474 309 6 309 282 257 374 270 
257 35 462 54 234 257 384 336 257 34 
458 353 309 408 289 28 268 229 346 407 
92 151 434 265 202 24 309 47 242 259 
257 328 214 175 250 29 327 
63 151 412 265 
13 409 462 251 381 242 115 
455 106 288 152 24 265 
179 284 47 316 265 263 
269 131 134 153 257 329 
84 46 113 340 47 72 245 441 
383 105 18 455 131 340 483 63 497 305 257 424 321 132 84 455 104 
179 468 184 265 455 497 134 396 32 458 129 
455 131 340 483 268 257 236 
455 273 110 265 242 202 127 62 165 84 231 129 
265 191 426 451 224 
257 260 462 469 154 129 456 217 
84 434 86 257 153 
257 299 346 153 191 134 318 
179 104 340 362 173 309 396 184 
269 191 62 96 357 441 
46 207 38 46 145 173 
257 91 462 251 309 127 316 398 53 
257 341 175 134 344 209 299 159 
242 497 127 257 443 
455 296 96 134 203 269 415 46 
438 119 191 446 
455 24 257 117 375 
275 151 308 320 
179 460 293 33 
487 335 179 11 52 309 314 13 454 
347 455 104 340 282 269 269 346 134 257 384 336 257 424 458 129 
455 103 63 358 305 264 
265 346 62 172 71 
63 250 62 50 115 
257 165 131 340 355 398 487 242 115 
265 191 212 418 18 
455 104 340 362 309 408 269 394 110 
3 257 496 115 457 47 437 485 
80 151 54 309 456 487 156 
458 175 212 375 88 
455 358 408 205 227 257 146 179 362 
63 151 310 336 257 76 239 
132 53 11 127 446 
63 202 472 269 32 
215 161 271 289 345 
63 432 134 453 309 408 485 
304 208 175 64 269 
458 129 257 15 250 235 88 
242 462 62 452 181 
192 462 54 309 127 257 456 441 336 80 
257 141 497 134 127 180 234 68 
390 47 64 257 482 
458 131 134 319 309 257 90 
347 63 151 39 179 11 319 458 129 
434 47 404 184 
63 11 319 309 334 458 129 
62 35 497 218 381 242 217 
179 131 340 188 286 
63 47 309 2 205 203 257 425 364 
439 434 22 427 
38 234 62 217 179 104 
455 358 351 314 8 
63 4 104 275 265 151 446 23 199 63 47 
455 96 110 455 497 458 129 
257 215 495 309 68 189 257 60 
257 12 170 250 271 367 68 268 257 253 
458 335 183 257 374 383 375 309 75 62 40 413 
269 11 127 257 297 237 407 
458 353 309 408 332 28 
455 131 257 291 118 203 479 458 129 
257 277 175 495 309 104 265 
269 191 134 99 69 179 202 127 116 
38 265 346 351 257 369 
132 458 307 309 319 172 451 
92 191 271 367 21 68 
139 388 324 173 
159 151 251 381 242 217 
179 47 62 67 39 393 
257 465 128 95 159 144 257 137 337 
38 458 307 309 267 46 84 
301 179 22 52 309 65 
257 451 224 7 20 464 434 251 269 
383 29 195 22 209 192 
179 250 383 317 
455 104 340 483 63 4 121 309 320 30 434 458 129 
458 431 340 362 184 
269 191 438 456 117 463 
455 483 269 351 191 340 110 414 
455 182 174 260 458 129 
455 104 134 362 309 188 205 
92 22 271 367 289 28 
132 269 373 460 244 62 430 
132 179 22 111 309 269 
264 151 13 222 
269 191 62 61 295 
179 227 282 309 35 
458 462 54 309 65 309 496 114 189 156 
455 110 455 497 104 428 50 275 
458 346 134 453 309 104 265 309 184 
132 458 191 62 50 330 
265 346 134 426 224 231 129 
455 497 340 96 188 269 
62 467 341 285 64 257 91 57 
159 22 340 251 487 229 
242 462 134 257 452 165 203 76 210 
63 47 271 237 118 
269 346 134 257 341 346 466 
265 181 497 218 485 89 156 346 407 
172 462 172 458 129 
132 493 222 47 152 361 56 133 
269 346 152 41 489 
395 159 22 251 176 192 
179 432 134 318 309 46 
59 462 62 357 118 458 129 
185 12 16 22 163 
271 270 191 491 203 257 253 
199 346 30 115 
458 191 257 451 309 319 189 409 
104 340 55 343 
455 483 268 269 257 76 129 
354 93 163 173 62 115 381 
132 455 460 362 309 305 
179 11 244 257 437 32 
62 115 18 455 131 340 483 269 191 
458 191 310 336 174 387 
257 82 191 251 
493 482 497 134 142 127 36 
458 346 62 357 393 494 
62 407 191 251 374 217 
370 133 131 134 142 68 189 257 207 
63 351 47 309 103 234 257 392 458 129 
455 104 340 86 199 191 453 189 
265 462 227 179 362 309 104 
132 458 131 47 258 
484 388 189 309 244 40 378 
179 47 309 59 265 
426 260 431 134 362 205 
269 122 127 438 456 437 
265 346 257 130 63 2 257 260 
257 341 495 
269 191 340 257 384 336 257 424 
377 140 368 312 
132 291 84 455 104 340 372 362 309 483 268 269 
179 497 134 127 180 234 68 
159 22 251 176 374 217 
455 24 257 400 
455 351 362 309 244 174 33 
126 336 286 151 134 299 194 231 129 
242 4 134 319 189 242 130 458 129 
269 346 126 107 234 184 
257 170 129 252 434 436 
265 346 199 63 131 
466 462 30 165 
132 269 191 62 50 441 
269 346 62 101 231 129 
455 131 340 188 269 
415 184 455 47 227 242 
132 257 167 334 175 134 261 
63 151 382 405 
455 96 131 340 349 269 
458 462 251 309 127 124 324 62 170 334 
455 104 340 483 269 11 127 257 443 242 33 
179 131 340 362 309 127 254 203 265 29 210 
132 179 4 2 428 357 476 
147 462 351 257 130 458 202 47 473 309 319 
271 29 28 336 257 401 47 152 209 
455 483 231 346 50 
458 346 270 336 257 312 
46 4 460 48 205 458 129 
63 250 309 104 265 458 129 
242 191 62 67 357 397 234 205 
179 432 220 189 265 
32 458 131 340 408 62 42 
132 92 22 340 
455 351 473 309 305 
455 11 47 309 349 
84 458 462 453 309 282 300 415 269 
269 183 62 489 33 458 204 
104 340 188 203 205 
29 364 151 54 309 127 209 381 242 34 
455 131 340 96 47 62 429 309 145 189 257 334 
92 462 62 496 341 
174 387 307 184 309 218 172 
257 44 462 460 453 189 458 129 
132 347 458 473 184 309 127 92 455 202 127 92 
257 395 159 151 251 324 257 384 336 257 115 
159 22 134 251 324 229 
347 269 431 340 269 431 340 
383 341 120 22 214 491 
269 346 235 41 442 234 265 
257 489 313 462 189 156 
257 312 151 288 257 456 309 86 
63 432 8 309 127 446 
231 129 89 270 369 
132 455 104 340 483 269 11 127 242 270 
132 63 471 340 55 
63 131 340 86 199 269 145 
231 191 40 144 257 451 71 
265 346 453 309 218 38 319 415 438 260 
231 131 340 408 394 28 336 257 80 
458 129 179 22 128 309 127 203 357 102 
132 269 11 127 41 442 56 335 
132 458 131 340 203 242 443 
241 6 309 472 269 189 13 27 
49 179 22 340 234 233 
257 393 287 271 385 28 
132 92 346 62 298 
455 129 269 462 174 378 336 311 
271 496 80 22 54 
257 409 462 251 309 456 62 217 
455 497 340 55 205 
455 296 134 453 309 35 
269 131 340 408 394 332 28 
269 346 453 309 319 189 234 62 489 33 458 129 
14 11 320 257 164 303 
45 242 462 134 62 243 325 
458 284 47 152 
265 346 257 456 118 455 202 104 269 346 257 456 118 458 202 104 
257 304 404 245 62 402 407 456 217 
269 131 340 408 385 28 336 257 247 
179 104 340 104 286 203 
458 273 17 62 413 
250 62 50 407 458 468 87 
179 353 309 153 257 465 
257 409 191 251 309 121 156 
257 165 462 72 238 270 231 129 
63 113 340 305 205 227 132 63 151 8 
265 346 189 257 168 
265 346 227 63 432 453 309 177 
132 423 11 244 13 378 
265 346 257 118 268 242 424 
257 85 287 271 28 336 257 80 
428 434 483 269 346 357 
269 131 134 408 28 268 29 434 491 
455 106 288 83 265 
455 106 218 469 264 415 423 
84 458 230 104 269 32 
185 440 129 179 131 340 86 
422 175 495 309 104 265 
62 138 299 129 
426 168 462 134 41 357 
179 250 271 29 146 
89 456 63 474 205 458 129 
265 346 257 456 118 179 362 
242 25 462 67 107 458 129 
46 96 104 340 86 
63 106 474 309 282 254 336 265 
271 420 247 11 218 254 336 257 80 256 445 242 217 231 129 
46 47 309 104 257 97 118 132 269 346 134 174 260 
347 179 55 270 310 336 426 260 63 319 309 257 29 
265 346 271 130 309 71 62 101 
347 46 282 205 265 346 357 
63 460 47 62 489 130 309 319 458 129 
383 120 214 22 163 
179 273 372 7 337 
265 175 340 152 62 165 242 217 
133 159 22 134 251 487 192 
458 351 431 340 104 265 
269 191 62 452 165 
458 431 340 362 309 82 
179 22 381 427 56 215 
63 362 257 459 162 309 311 
455 47 103 458 129 
38 455 191 198 309 104 265 
265 346 257 49 118 63 4 104 291 84 
269 462 340 469 344 
455 96 362 309 305 269 
455 483 63 284 104 257 97 20 179 486 62 365 
269 346 72 107 294 
458 182 96 50 
242 462 434 333 
62 401 462 251 309 127 322 242 217 
46 47 309 311 234 269 
179 131 134 65 62 60 234 68 189 229 
458 351 373 282 30 429 
241 47 318 485 
458 250 439 448 
257 12 21 131 134 142 68 189 257 138 477 
458 110 336 76 170 373 
265 346 13 259 179 106 474 13 291 309 104 265 
242 462 134 62 43 389 
215 353 309 408 233 153 
63 11 396 32 
458 131 134 153 257 149 
132 63 131 62 50 259 
458 175 152 209 475 62 302 
458 182 67 357 
269 346 271 446 23 394 29 443 
370 133 129 192 
458 129 458 278 309 160 
139 47 134 152 249 56 257 398 324 
354 368 133 214 497 134 142 127 180 
265 346 257 451 118 179 47 309 104 
179 104 340 55 46 
455 351 473 309 104 269 257 291 130 
126 151 83 309 47 152 209 
458 191 427 62 464 105 381 
269 346 62 291 63 284 47 
271 419 175 152 54 
62 285 353 68 
257 451 462 54 229 
179 11 134 282 265 458 129 
63 358 104 426 392 
92 11 127 62 441 
63 200 136 336 257 141 
455 104 340 188 269 231 129 
269 346 134 257 456 260 336 257 281 
166 101 462 254 
63 47 152 414 257 77 324 
269 346 107 234 184 
452 316 271 29 398 68 376 
257 224 462 257 424 321 458 73 
257 29 191 209 301 
138 133 497 134 127 142 180 234 68 
63 432 96 453 234 269 203 257 467 137 458 129 
132 458 129 101 175 152 357 
347 46 250 309 2 269 32 455 202 47 306 
269 346 218 280 309 265 
257 51 64 269 
455 188 265 346 257 291 263 
455 296 134 240 357 240 455 191 377 492 18 
458 436 252 492 18 
257 283 303 214 250 271 367 68 
458 129 241 373 214 127 382 
455 86 455 191 340 92 458 129 
458 353 309 408 385 28 336 257 401 
31 214 462 134 62 380 
257 123 131 340 55 
203 201 458 462 407 366 292 
455 358 351 47 309 59 278 
335 458 191 209 
257 390 129 439 434 22 491 
63 47 426 248 488 
269 284 340 127 132 269 351 462 
179 432 134 203 257 130 
143 434 151 453 189 
231 191 41 357 234 184 
257 341 495 309 68 189 229 346 334 345 
257 166 462 134 486 309 257 398 
231 191 226 309 257 302 
63 460 483 63 47 62 357 429 336 453 189 
301 191 438 456 441 
84 179 47 423 
458 124 309 55 233 
46 113 340 305 227 257 33 
242 462 227 455 106 473 309 104 234 62 489 33 
212 195 22 427 360 257 441 
63 351 497 340 258 205 
458 497 340 104 269 
455 131 340 2 174 392 231 129 
458 191 209 379 62 409 
458 191 62 50 330 
269 191 270 336 174 392 375 
215 133 495 309 68 
257 341 175 361 242 
269 202 127 485 309 257 213 
63 104 340 86 199 426 325 462 
458 191 134 54 309 267 43 292 
455 11 134 71 32 
92 175 309 127 30 130 
179 47 271 146 268 173 458 129 
455 104 340 362 309 483 268 269 
231 17 203 257 451 447 456 115 
347 458 462 458 175 62 291 309 127 
92 151 271 470 15 264 458 129 
179 122 47 62 369 
185 434 47 152 427 
271 76 120 22 128 491 
455 86 233 260 231 129 
30 407 191 251 229 
132 455 47 340 249 233 
257 434 47 306 
269 284 104 257 97 234 143 194 
92 47 152 271 253 
84 269 346 62 39 338 
458 4 104 62 391 336 275 
265 462 257 392 455 4 104 
63 293 309 314 8 
455 191 453 234 257 305 
92 191 271 367 68 475 438 90 
269 175 226 62 391 336 311 
63 230 47 332 16 
455 131 340 244 174 33 
269 4 127 446 
257 170 129 269 250 271 289 28 
455 104 340 483 63 284 47 242 89 257 375 
265 497 244 428 33 
257 70 353 
92 22 271 367 222 336 343 
455 250 309 282 9 269 
132 103 462 134 17 
455 103 242 462 62 166 179 96 362 309 349 
92 191 271 68 475 370 133 
79 69 269 191 33 309 82 189 458 129 
63 250 309 483 269 469 
458 129 458 497 134 408 28 
265 297 210 175 152 357 
257 222 497 134 142 127 36 376 
257 154 157 36 265 
154 175 495 309 104 45 
132 11 179 104 269 
63 250 309 244 426 429 
227 151 83 309 47 152 17 
179 129 179 351 362 309 274 438 153 
458 250 62 357 429 
92 191 271 68 475 43 133 
455 351 88 205 231 129 
132 455 104 227 257 275 46 104 
84 269 346 33 234 428 332 158 345 
455 483 63 151 453 309 47 62 401 
21 133 497 134 127 180 234 68 
14 202 106 110 
455 296 8 309 127 257 392 
455 131 340 104 269 405 
269 346 199 46 349 
84 269 346 152 439 375 
458 191 209 475 257 302 456 217 
455 113 340 483 268 269 84 
46 106 474 309 401 415 265 
231 346 134 257 270 
155 88 257 393 144 242 236 281 
456 115 231 17 264 203 257 297 447 
38 455 483 63 47 265 
100 455 17 174 456 397 412 233 455 131 340 362 309 408 233 257 429 309 282 9 257 397 
455 483 455 202 458 73 
132 63 4 104 332 
63 432 453 309 121 
242 462 199 179 251 
257 80 22 251 309 456 414 257 217 
179 131 340 282 62 429 
132 265 346 257 416 
265 346 227 257 466 63 250 88 
92 22 252 456 281 
242 462 257 49 270 458 129 
455 296 453 309 408 173 62 315 270 336 143 105 
179 250 356 201 29 
455 86 14 46 151 
464 28 336 257 496 401 22 209 
354 191 72 181 234 246 
271 29 472 175 306 62 294 242 115 
257 302 250 271 29 146 
455 483 231 131 62 50 259 
257 297 447 462 84 54 234 376 
455 104 340 311 254 458 129 
133 92 497 134 127 142 180 
455 296 134 453 309 408 485 62 429 309 2 203 62 260 24 242 
257 215 468 184 309 282 254 
257 170 64 269 
132 63 104 340 47 269 291 84 
265 191 64 56 257 341 
46 47 309 187 485 415 269 
63 282 199 346 88 
455 47 271 459 84 
269 462 62 117 338 
257 341 175 64 257 328 482 
257 491 22 226 309 302 
246 47 152 209 
269 191 257 451 128 407 262 257 383 
185 434 22 163 38 212 22 491 
257 12 170 129 269 250 271 146 268 257 443 
265 346 134 426 224 291 84 
271 29 120 47 152 116 344 203 257 443 
257 140 161 309 160 
257 435 90 495 309 68 
179 382 280 257 216 137 89 270 369 
377 120 22 491 203 257 207 
269 11 273 59 
455 483 458 110 455 191 257 29 130 
62 263 462 251 309 244 266 418 
242 343 122 127 489 458 129 
92 462 271 313 
341 133 497 340 142 127 180 234 68 
398 328 462 214 39 
231 175 64 257 482 
455 362 309 104 269 227 
31 346 476 169 353 68 192 
63 113 340 104 379 265 458 129 
92 191 271 367 68 475 257 186 189 257 247 
455 483 269 346 453 309 244 33 458 129 
458 4 305 257 33 409 
269 346 227 446 
92 346 271 429 234 269 309 59 458 73 
246 129 179 22 134 
62 35 462 251 381 242 34 
265 443 462 251 309 218 309 409 203 268 62 115 
84 462 257 33 309 59 227 242 
458 191 257 61 494 
257 459 162 175 139 327 
455 104 340 483 63 284 35 189 242 270 115 89 62 33 
257 162 462 125 309 244 266 418 
323 462 99 268 257 141 
140 133 193 
370 133 104 340 362 269 309 218 309 265 
269 122 127 62 489 437 
242 462 174 393 84 38 242 462 174 140 
231 497 340 282 300 475 233 259 
92 462 271 165 262 205 
132 231 131 340 188 269 
269 191 209 229 
458 202 273 244 62 429 
458 250 271 289 28 336 257 443 
455 273 388 144 205 
455 104 340 483 179 47 309 127 468 458 129 
455 362 309 396 38 455 362 309 305 
269 346 152 62 430 3 455 306 458 129 
46 351 314 189 453 
455 351 362 309 319 172 231 129 
265 175 340 152 72 181 242 115 
38 179 460 47 134 306 264 
455 110 269 191 357 231 129 
269 346 134 453 309 55 184 458 129 
62 297 35 462 54 192 
465 133 497 134 142 127 180 234 68 229 
458 131 134 153 257 399 
63 497 340 104 269 
215 495 309 417 438 153 
458 431 134 408 438 153 
242 115 269 346 476 
458 353 309 68 189 257 325 
269 346 134 453 309 59 174 210 
63 293 242 137 
179 250 251 309 319 172 
132 265 346 351 310 336 233 160 
62 465 285 353 289 68 
455 483 269 96 131 340 
63 388 234 257 305 
63 4 472 62 411 
63 104 340 362 123 
63 113 340 55 205 
72 247 191 381 180 
63 47 474 309 311 189 265 
458 497 340 142 127 180 234 68 
38 265 346 199 63 131 
231 191 226 309 62 216 302 
458 202 134 408 438 456 153 
257 302 131 134 142 68 
257 91 287 271 28 336 257 247 
132 458 131 340 293 269 
458 250 271 289 367 28 
179 151 62 333 84 458 129 
257 395 462 229 
257 383 195 161 309 267 374 217 
179 163 174 195 
265 191 62 50 437 231 129 
299 80 22 54 234 156 
458 474 300 475 184 
257 341 131 134 68 189 257 207 
63 432 203 257 97 325 
257 311 63 293 309 121 309 104 462 67 274 458 129 
269 346 199 458 473 
455 273 110 269 202 218 309 242 231 129 
428 22 427 
179 202 160 309 257 167 334 
269 346 13 338 
269 462 134 257 315 63 473 
257 21 285 202 134 68 
434 151 453 309 349 286 264 234 62 489 33 309 218 458 129 
46 47 257 466 
132 269 346 134 257 97 84 
242 462 257 130 63 432 453 309 2 
335 458 358 472 438 263 
92 202 127 30 270 
458 495 309 408 394 29 28 
257 169 477 287 271 289 28 
257 462 134 344 17 458 129 
242 462 67 274 
231 131 340 153 257 328 
242 191 13 395 160 
455 296 134 453 309 282 9 265 
458 346 474 257 466 
257 375 47 152 446 
265 191 62 217 18 
231 191 134 116 
458 471 340 127 318 62 429 
458 358 125 127 209 374 217 
179 497 340 55 233 
45 265 346 357 350 
92 191 271 367 68 475 257 354 93 
458 214 131 134 408 28 
63 351 113 340 483 24 265 
46 351 47 309 319 189 
265 346 62 357 118 234 438 416 
257 425 364 191 134 228 205 
347 458 431 340 458 431 340 
334 133 495 309 68 
132 179 104 340 137 269 265 130 
257 465 497 134 127 180 234 68 189 376 
265 346 423 309 104 415 233 458 129 
387 312 353 68 376 
179 151 24 387 312 
257 78 495 
63 151 220 189 269 
458 346 67 107 234 257 186 393 
458 462 257 270 455 362 234 174 277 
458 175 309 103 269 431 
257 407 497 244 378 240 176 240 171 
231 175 152 226 
269 462 134 62 357 350 
63 11 38 455 11 
455 351 103 257 159 151 257 97 
132 242 462 257 451 33 179 131 340 
179 250 13 429 
46 47 309 82 189 38 104 29 275 309 258 472 485 234 269 
179 293 426 258 
455 27 174 27 303 
458 462 251 309 127 92 62 217 
269 191 257 291 118 309 104 
455 296 453 309 6 309 258 89 257 303 
455 473 309 127 310 336 269 
132 458 175 495 
63 11 315 142 
231 191 340 257 49 270 
63 86 210 175 309 319 189 
377 434 47 152 427 
45 63 4 134 177 14 179 151 
458 373 282 438 26 
257 341 64 265 
335 7 257 357 270 
455 131 340 86 265 458 129 
63 358 104 265 234 46 
257 85 131 134 408 28 
46 47 221 
92 191 271 367 68 475 257 341 189 257 91 
458 431 340 288 24 269 
377 22 209 456 217 
455 7 203 415 46 38 455 296 453 254 415 46 
63 362 434 309 218 458 129 
46 86 466 80 
62 435 70 316 257 60 
137 415 257 213 203 297 378 
62 169 285 495 309 68 
201 178 11 282 95 26 336 257 140 458 129 
269 346 33 309 166 265 63 151 434 336 459 
132 92 22 271 222 336 123 
257 21 129 257 43 131 134 486 77 
455 362 174 400 309 127 257 97 
199 151 434 453 309 177 
269 431 134 311 89 227 
38 265 346 257 130 269 94 
257 29 191 209 
38 317 284 104 257 97 
455 47 306 62 50 401 336 466 475 257 137 458 129 
92 346 423 455 4 104 268 265 
269 191 351 270 336 493 105 
63 358 19 438 160 
84 63 432 203 257 146 101 
63 460 47 62 489 130 324 286 458 129 
63 11 134 472 72 181 336 242 
63 227 86 265 242 462 134 469 
92 346 423 309 177 
455 288 483 458 202 2 
269 462 134 426 259 309 104 265 
63 11 121 257 311 487 63 432 468 309 55 458 129 
231 287 271 289 28 
257 465 250 271 29 68 
269 11 244 62 323 430 
347 455 104 340 24 269 455 358 472 269 485 
257 169 250 271 367 68 189 257 222 
46 351 104 340 188 269 
179 432 134 24 394 29 
45 455 103 455 11 2 
92 346 423 455 4 104 268 269 458 129 
455 103 458 471 340 104 265 257 277 468 87 
455 131 134 86 63 250 143 327 
132 63 250 309 104 269 
62 441 381 458 436 
179 106 152 414 269 324 
455 103 309 127 270 336 205 
84 269 11 227 218 485 32 
242 115 246 22 117 
455 188 63 316 257 291 263 458 129 
179 131 134 47 394 332 146 
63 47 309 121 
257 241 436 381 
63 86 63 113 340 55 269 
455 351 483 458 346 257 330 234 257 259 291 84 
455 24 309 314 269 203 257 387 231 129 
458 64 222 265 179 22 437 56 410 
63 497 134 104 269 32 405 
269 131 134 408 28 336 29 80 
257 406 131 134 420 229 
257 476 169 250 271 299 68 189 257 91 
493 275 11 288 127 107 309 184 
214 308 257 170 488 92 462 271 160 162 
132 455 11 218 197 38 6 32 
458 131 340 408 184 271 327 
257 263 11 127 322 192 
242 462 62 117 42 
458 175 134 152 249 32 
241 129 257 298 191 41 167 
269 346 257 397 336 257 281 
458 250 271 68 189 28 336 257 443 
455 351 103 455 4 47 174 67 451 305 412 233 
271 455 104 340 188 269 
335 32 269 122 134 
132 29 449 133 182 280 257 68 
203 62 325 24 242 63 432 273 291 
269 191 351 45 50 
269 346 134 24 405 
291 84 269 346 423 
455 111 309 104 275 458 497 340 104 455 111 309 71 
188 184 189 242 270 
215 129 423 191 356 
179 47 163 426 494 
10 131 134 472 62 477 
455 362 309 127 336 258 
257 456 447 336 80 191 445 229 
179 293 257 101 
46 47 309 104 62 42 336 275 
132 269 346 134 257 384 
231 353 309 153 257 329 
265 94 309 59 242 217 
63 103 309 127 24 205 270 441 
257 465 175 62 489 130 309 319 458 129 
38 455 362 309 127 92 
56 171 269 490 309 127 41 442 
63 11 121 309 104 426 392 
458 191 404 197 456 217 309 257 259 
132 179 131 423 
38 455 106 250 265 
455 483 269 11 134 
299 159 22 251 381 
63 460 47 62 391 336 103 
46 4 134 188 269 
242 11 47 309 59 
455 106 351 152 67 337 
231 175 309 104 269 234 257 297 33 242 115 
455 104 340 483 458 175 62 441 245 
496 114 462 62 117 140 
493 151 134 194 458 129 
231 346 134 257 49 270 
455 351 24 309 2 
455 188 458 462 62 50 494 336 257 393 
269 462 340 220 84 
38 269 131 415 270 102 
458 145 184 415 62 357 437 
63 362 309 86 426 416 
185 22 427 
46 106 474 309 319 234 269 
215 47 209 464 29 28 
383 22 437 203 257 211 
458 131 269 203 272 105 
132 455 104 340 483 458 358 104 265 
458 346 343 62 330 84 
132 455 104 340 19 123 
46 151 257 494 336 31 
383 215 214 22 163 
242 462 496 146 234 184 
92 151 58 327 
46 47 309 119 205 
455 351 473 309 282 254 336 264 
234 84 269 346 41 176 309 177 
242 462 62 357 393 379 184 458 129 
257 419 287 286 423 231 129 
455 104 340 483 268 269 231 129 
84 179 362 309 55 30 
455 202 24 309 47 306 242 
84 92 346 428 476 
62 35 462 251 374 34 
271 270 372 7 337 
460 458 431 340 86 199 346 374 
265 316 184 55 38 483 458 129 
269 191 62 50 383 105 
84 63 47 309 349 199 462 257 459 411 
132 269 191 62 67 107 260 
92 22 271 222 336 29 470 491 
227 47 152 209 
62 138 299 250 271 367 68 
455 131 340 86 269 191 203 
179 273 47 152 
269 346 152 272 105 336 242 
92 462 323 311 
132 265 462 413 309 59 
199 462 426 311 84 
179 362 257 466 
458 129 257 387 79 265 271 29 146 127 209 
257 109 250 271 367 68 301 
144 227 269 462 13 466 
57 438 2 131 
12 215 497 134 142 127 180 234 68 
201 330 191 163 56 62 437 203 257 211 
269 346 332 107 23 265 
255 346 470 169 214 129 269 250 271 146 
257 425 364 17 203 257 451 447 
455 4 177 265 257 325 462 308 320 458 129 
179 47 41 196 170 333 458 129 
1 346 470 399 462 214 251 309 25 
458 191 427 190 242 115 203 257 425 364 
159 22 251 176 156 
179 104 340 24 269 
46 282 189 415 269 
257 263 7 144 257 406 137 250 382 
215 353 309 408 28 
92 191 271 367 68 475 186 390 
179 129 179 411 309 160 
63 47 309 305 257 374 270 
455 273 110 455 202 127 198 309 177 265 
28 336 257 411 331 
257 277 175 309 71 438 338 
257 302 175 495 309 408 394 146 
231 131 340 197 280 335 
120 437 38 163 173 
234 257 357 336 438 434 458 284 
265 466 11 84 127 17 
265 346 152 426 117 224 
38 458 191 291 92 
151 179 96 203 92 
257 366 215 85 495 309 68 189 257 91 
458 129 271 270 79 
257 387 230 127 337 
271 455 104 340 483 45 
455 124 309 258 205 
455 202 340 86 231 129 
257 476 169 129 269 250 271 146 189 257 325 
84 455 483 92 11 127 243 
179 22 38 179 131 
242 462 257 166 346 49 55 
92 151 62 391 336 327 
257 330 353 309 68 289 
265 346 257 325 84 
269 346 265 33 336 257 115 458 129 
63 131 340 362 309 47 394 336 265 
265 191 67 274 
62 341 285 64 257 482 
62 263 497 127 322 240 176 240 53 
265 11 127 62 489 33 309 218 
455 411 189 269 458 129 
458 175 309 47 265 168 
179 284 282 111 309 269 
63 362 309 472 466 458 204 
170 390 353 309 68 189 257 222 
465 133 497 134 127 142 180 234 68 
458 64 222 265 179 250 152 427 
257 285 131 134 408 289 28 
231 129 257 141 202 160 
150 133 497 134 142 127 180 309 68 189 257 91 
132 269 11 127 426 247 
233 153 191 134 209 
133 131 134 142 68 189 257 123 
92 191 423 309 104 
269 11 127 257 451 237 247 262 257 425 364 38 62 158 338 
179 47 134 152 52 309 65 
132 458 129 257 466 316 173 104 269 
45 46 104 340 86 
458 462 62 67 357 330 
11 458 319 234 257 168 
271 29 375 22 54 234 156 
257 409 462 251 309 337 374 217 
257 12 21 131 340 142 68 
242 191 257 291 33 234 62 59 
132 265 346 199 455 110 324 
1 175 64 242 
92 191 271 367 91 336 343 
132 275 474 300 475 201 336 205 144 265 
179 351 104 340 86 199 269 462 
458 214 129 257 298 175 309 127 291 
92 191 271 68 475 257 186 
292 218 38 319 
269 191 62 357 217 234 184 
269 346 62 117 137 
179 104 340 372 2 
84 269 462 33 234 286 
269 191 480 346 451 260 
335 257 333 388 245 
257 35 462 251 309 127 337 
304 208 250 193 309 257 407 
465 133 497 134 127 180 234 68 442 376 
455 110 92 202 127 62 391 336 434 14 193 415 184 
455 113 340 188 455 316 269 
332 23 185 363 434 22 163 
63 49 47 270 224 
132 179 497 134 55 257 253 
92 462 423 458 202 134 104 
257 70 316 271 367 263 
265 346 270 336 257 464 275 179 26 
458 129 265 271 338 284 47 339 454 
63 362 49 459 
458 191 67 357 231 129 
242 462 257 297 33 265 479 175 316 237 62 60 
395 28 47 134 152 209 
458 191 351 62 50 330 231 129 
455 284 47 306 242 397 
458 131 340 408 286 394 327 
38 257 400 47 309 188 265 38 63 47 309 472 205 188 269 
51 133 497 134 142 127 180 234 68 189 257 91 
159 22 134 316 398 
269 11 127 41 442 
377 410 22 163 
270 330 191 356 144 62 464 105 
46 113 340 59 269 
46 202 214 47 309 59 257 153 336 257 389 458 129 
63 86 269 113 340 127 246 
242 462 62 243 309 205 
458 191 209 171 
45 63 432 453 309 104 269 240 62 393 
455 188 455 106 474 270 336 493 
92 346 271 378 309 187 205 
63 351 47 309 472 257 392 263 
63 104 340 362 309 187 173 469 438 211 
62 341 85 129 229 
12 133 129 271 278 250 152 316 234 237 62 407 
132 257 221 151 340 234 383 418 
455 104 340 293 309 319 189 
231 250 271 28 189 13 102 
212 22 209 190 
458 202 134 68 289 
72 44 462 460 308 130 
458 175 134 152 356 56 215 
257 409 462 203 95 40 217 
265 346 199 455 129 
46 351 103 234 257 392 
310 270 490 456 217 
215 209 271 29 146 
257 465 497 134 127 142 180 234 68 
272 410 22 214 163 
242 462 257 49 33 269 462 107 
92 346 271 59 
265 462 134 257 443 257 477 129 
63 103 234 257 392 231 73 
62 464 473 309 319 
257 215 131 340 77 
179 7 254 39 
271 263 175 152 316 
159 151 251 144 383 418 
455 351 47 309 2 174 260 
269 497 384 485 256 233 49 270 
46 11 273 2 265 260 32 
257 425 342 250 152 251 309 472 257 91 398 
63 151 412 394 170 345 458 73 
63 104 340 47 394 336 265 
269 191 240 39 240 58 100 92 191 271 29 130 458 129 
428 372 79 234 205 
134 125 458 129 
62 395 35 462 54 234 405 
92 346 423 46 4 104 268 265 
132 269 346 134 199 455 473 
92 191 271 367 68 475 257 328 
246 129 271 407 250 152 54 
265 284 134 127 62 165 
347 458 4 104 269 46 4 104 269 
30 252 434 22 491 
455 483 265 458 11 104 269 
455 188 179 358 104 257 291 118 
132 455 47 340 249 394 
458 175 340 436 344 
455 473 309 282 197 89 173 
231 335 79 205 234 466 
179 104 340 47 309 218 
63 432 134 62 393 265 346 453 309 6 62 391 336 446 275 
271 29 28 47 152 128 
63 362 309 349 205 119 309 119 458 129 
265 131 134 314 205 475 8 
269 191 382 309 195 
63 106 152 24 387 
179 84 47 439 
455 296 453 309 82 174 211 
132 257 334 361 257 160 
159 151 251 192 
257 91 131 134 153 257 241 
242 191 340 270 336 205 
458 4 134 71 32 
179 191 96 453 89 269 
458 462 460 257 43 494 
269 287 271 29 28 268 233 38 129 231 497 134 127 180 234 68 
179 47 271 317 
257 354 368 191 54 309 267 32 301 
269 287 271 28 268 257 141 
455 131 134 305 257 243 
269 346 62 50 378 309 2 
257 5 175 134 344 152 427 
92 191 271 367 68 189 257 410 
63 382 257 443 
455 103 269 11 314 453 
269 293 134 127 257 456 
132 179 47 309 258 286 258 205 
132 455 244 423 300 475 173 
257 352 486 462 240 117 240 179 282 
234 139 265 462 41 489 
269 122 127 189 257 239 63 11 349 
92 230 127 30 130 
269 191 257 451 336 439 
179 22 245 309 62 357 315 
271 466 191 356 
455 351 362 309 35 
62 350 225 191 161 234 381 203 257 441 
269 202 331 271 370 15 
458 214 175 62 411 
271 123 191 142 128 156 
455 202 340 47 62 259 
458 346 273 316 269 236 257 297 447 
458 191 134 251 309 65 
458 191 209 176 376 
458 131 134 153 394 336 205 
458 131 134 153 173 
265 346 257 456 118 455 202 104 
132 456 115 458 306 383 
269 346 271 117 401 347 46 483 268 269 
257 341 477 287 271 289 28 
132 455 131 340 483 268 269 
269 462 251 309 315 311 374 115 
265 346 453 309 244 428 33 
458 214 108 234 206 16 
426 434 362 459 
334 133 497 340 142 127 180 234 68 
38 269 346 62 96 489 441 
455 96 284 6 
231 131 242 189 233 27 
38 179 284 86 
428 434 411 269 324 179 282 264 458 129 
458 214 54 80 415 219 292 
179 22 96 39 
84 63 230 166 269 
458 129 257 162 373 244 418 
455 131 340 483 455 250 62 429 
455 191 39 458 129 
46 293 309 396 234 205 
458 129 458 250 134 344 249 269 
231 404 269 62 216 165 
231 73 265 231 273 251 309 305 
458 346 453 309 127 357 
458 462 251 309 244 90 374 217 
76 238 141 
10 131 340 55 92 
496 114 431 340 47 62 393 
63 432 240 357 240 179 151 
179 437 173 20 458 495 
257 375 384 189 171 
455 296 89 257 384 336 174 210 458 129 
46 104 340 362 205 309 59 
455 86 455 47 309 104 265 
455 468 205 265 405 
271 270 191 491 203 265 77 
269 175 344 309 417 28 
132 455 296 453 309 6 
458 129 179 22 134 491 
269 191 273 356 
455 296 134 62 357 81 458 129 89 270 369 
269 346 96 257 395 
63 11 82 347 257 370 431 257 285 129 
62 40 330 191 116 190 
347 46 104 340 46 47 423 309 177 
215 133 129 179 250 271 146 268 257 443 
269 462 134 24 265 
132 269 346 134 257 451 33 
265 284 127 117 234 286 
455 104 340 483 455 131 
133 497 134 127 180 234 68 442 192 
227 265 122 59 
227 439 47 257 291 309 160 
63 473 309 104 257 291 118 458 129 
63 104 340 362 309 396 
257 21 495 68 
132 257 383 64 257 222 
455 113 340 483 268 269 231 129 
46 432 453 309 47 309 104 269 
458 175 62 391 336 260 
242 284 134 127 62 117 181 458 129 
347 179 104 340 24 269 179 4 319 172 
43 133 495 309 68 
269 191 438 40 424 321 305 336 257 281 
455 86 455 4 127 92 32 
269 11 288 127 310 336 426 260 411 
257 334 346 374 407 462 171 
455 131 340 362 309 127 254 203 257 486 
179 129 179 131 134 
455 103 458 346 291 
132 92 462 460 62 489 130 309 319 
269 175 344 309 6 95 451 443 
246 47 152 209 475 257 302 
92 462 340 458 129 
132 269 462 134 274 69 257 443 11 319 309 409 
257 398 251 269 
269 191 62 337 35 
455 296 8 309 166 46 
92 462 271 270 24 173 
455 131 340 86 265 231 129 
231 191 335 427 
62 138 285 129 479 462 223 309 401 415 394 338 269 307 
63 103 309 104 265 469 257 374 383 418 458 129 
458 495 309 177 332 
484 64 257 91 
242 462 50 231 129 
269 175 344 309 127 356 
242 462 438 40 25 
179 483 269 346 62 260 
46 104 340 293 394 466 455 129 
62 219 299 64 265 
271 29 28 22 209 442 192 
257 277 4 319 234 62 172 71 
92 346 96 271 130 
63 432 264 309 19 173 
257 465 495 289 68 
179 47 64 493 482 
438 409 94 156 
62 295 191 251 190 242 217 
62 71 276 189 265 2 
28 336 257 334 263 47 273 152 316 398 
297 244 270 441 89 62 33 
63 362 309 349 62 35 405 62 370 299 129 
455 497 340 258 269 
265 11 125 134 127 234 185 418 
62 215 285 129 
471 340 104 257 97 
269 131 134 408 289 28 336 438 102 
179 47 152 92 185 492 
455 483 63 293 418 
231 436 62 464 418 381 
159 151 251 89 257 384 336 257 217 
265 346 257 130 455 311 
271 263 175 152 226 56 257 334 
38 242 462 270 336 205 
269 175 288 152 337 
57 458 131 134 47 289 28 
257 29 270 462 265 46 151 257 49 434 14 177 63 47 309 59 
132 92 346 332 309 218 
257 395 11 127 182 156 
179 47 474 309 166 485 
231 436 38 455 191 134 198 309 349 233 
269 191 62 357 441 231 129 
455 11 273 349 205 32 
444 208 193 
462 458 453 309 305 32 
63 111 309 177 63 22 62 393 
62 395 263 462 251 381 242 34 
132 458 131 134 408 394 29 28 
132 423 11 127 97 
455 47 271 270 231 129 
269 191 134 62 429 68 
242 217 269 346 243 
455 96 110 63 497 47 306 231 129 
257 185 29 195 47 436 
132 269 346 134 200 344 
242 462 227 179 106 474 
231 175 129 231 11 160 
269 346 453 309 127 62 357 294 
92 191 271 123 
63 106 250 62 357 315 
455 202 134 177 242 462 257 384 231 129 
455 47 340 249 173 234 62 430 
92 11 288 127 434 412 459 
63 202 24 309 349 205 282 254 
257 476 129 269 202 160 
63 351 104 340 86 265 344 
46 106 474 309 282 453 
458 129 89 62 350 225 301 
179 22 92 309 127 249 
455 495 309 104 265 
46 104 340 86 257 165 
455 483 458 346 257 270 14 346 453 309 104 269 
92 346 271 332 33 
215 131 134 86 13 102 
395 159 22 134 251 53 
257 170 285 497 134 127 180 234 68 
63 11 319 234 257 297 
84 242 118 462 62 393 165 
257 91 287 271 28 336 438 417 
132 63 356 62 130 309 305 30 337 260 
242 462 174 456 429 
458 353 309 68 
4 179 314 269 485 
231 473 309 258 
455 131 340 483 268 269 458 129 
257 162 462 251 309 244 383 105 
455 104 340 24 173 38 458 431 340 24 184 
179 131 134 417 289 28 
132 63 19 201 29 
132 269 462 446 84 
257 365 64 257 222 
132 455 104 340 483 63 358 47 309 
257 169 250 271 367 68 189 257 91 
62 295 497 218 89 394 33 
257 159 22 251 203 185 105 
63 4 305 458 129 
455 113 340 188 269 458 129 
352 21 133 64 257 91 
381 458 129 265 479 495 
269 11 2 257 425 364 203 95 395 141 260 229 
438 477 129 
269 346 235 161 
257 222 386 173 240 290 
269 490 309 127 257 97 141 
63 4 417 332 257 277 129 
455 96 362 309 2 242 260 
269 122 127 62 115 324 63 86 
269 131 134 408 257 42 336 491 
265 346 227 46 362 309 104 
257 476 129 92 202 127 72 367 160 
46 282 9 257 345 
241 57 22 134 
138 133 64 265 
179 104 340 47 62 259 
132 242 122 244 266 492 
30 439 434 22 491 
132 458 131 340 456 489 
28 460 47 134 152 316 398 
92 462 271 29 130 309 160 257 334 346 263 
63 86 458 307 309 127 264 
92 191 271 367 68 475 31 189 257 91 
231 287 271 28 
63 131 269 456 33 
242 462 13 172 164 
455 293 242 234 174 101 
422 361 242 
291 84 63 104 340 349 269 
179 432 8 13 392 458 129 
257 343 93 336 496 114 
269 346 351 41 337 309 60 231 129 
179 151 134 107 
269 346 438 101 
63 104 134 293 62 75 264 
269 191 50 309 349 
428 275 351 104 340 59 
63 104 340 47 394 466 231 129 
92 191 271 68 475 257 354 368 
132 92 191 271 247 
269 462 227 101 
179 497 340 55 286 
63 151 460 343 143 410 
269 346 45 107 309 257 260 
455 473 309 314 173 453 
455 86 455 47 62 429 309 472 269 
265 462 426 357 350 234 405 458 129 
174 387 462 67 107 309 184 
257 425 364 204 304 208 230 384 95 339 313 142 
455 106 460 474 62 429 
179 106 474 309 305 242 270 
132 455 131 340 38 455 358 319 189 
269 346 50 309 127 197 
242 443 462 382 
455 483 179 106 152 36 
458 346 257 494 336 257 51 
271 289 80 22 161 
132 257 70 495 
265 346 257 153 336 426 260 
455 103 455 296 257 270 
179 284 127 486 
140 133 129 179 358 160 257 263 
63 113 340 311 24 265 
215 497 134 127 180 442 156 234 68 
257 334 303 191 382 89 257 33 336 257 207 
63 351 293 309 282 486 458 129 
257 341 214 250 271 68 
461 382 280 246 105 
347 46 47 257 466 38 46 47 257 11 333 46 4 282 275 453 
332 482 151 251 242 217 
265 346 257 130 455 244 269 
231 131 340 47 265 
38 458 122 127 291 
269 316 62 50 166 
455 47 340 250 33 309 483 268 269 
343 462 453 189 84 458 129 
455 483 269 346 62 357 118 
179 288 2 309 305 
174 165 462 174 165 347 92 372 462 62 165 
455 47 340 152 92 203 62 430 231 129 
63 4 227 2 242 260 
493 80 94 360 257 10 66 
257 341 131 134 68 189 257 91 
92 462 271 237 118 
455 103 309 314 269 453 
458 250 271 367 28 268 438 102 
455 110 458 131 62 50 259 
257 107 118 462 309 311 240 62 393 
271 270 175 152 491 203 394 336 493 253 
455 483 269 462 50 458 129 
438 90 250 271 367 68 
455 131 340 145 269 50 
257 425 364 38 444 208 47 64 269 
299 159 151 134 251 487 229 
257 370 170 36 257 207 
265 131 269 234 184 
257 169 353 68 
179 86 423 336 257 260 
179 104 340 282 269 
132 179 471 340 305 257 459 
265 471 340 311 234 184 
487 335 179 11 127 52 309 314 13 454 
132 270 462 332 125 
257 393 250 271 29 28 
46 284 35 154 129 
458 175 377 317 
31 346 170 292 129 332 253 22 125 
257 141 131 134 68 189 257 207 
63 106 474 309 282 269 453 
63 151 125 309 349 332 458 129 
199 191 257 117 401 
302 133 495 309 68 
132 458 73 265 175 340 152 62 165 
63 106 226 426 33 
257 40 191 214 427 89 438 172 
92 346 62 391 336 434 265 104 340 24 184 
265 346 227 455 296 8 309 104 
46 47 309 483 268 269 
63 250 237 62 50 488 324 458 73 
179 214 293 62 391 336 258 
257 334 462 251 309 472 62 395 263 381 242 34 
269 353 309 408 332 28 
271 270 4 244 269 300 475 184 
455 110 455 191 446 
257 215 104 340 314 257 459 
179 432 67 107 
255 175 64 257 482 
458 129 257 450 191 308 44 
257 409 11 121 374 229 
458 202 340 408 269 309 184 
455 191 67 398 268 265 
455 296 453 309 187 269 254 92 
269 202 127 257 451 237 25 
455 106 218 309 483 336 205 240 387 
271 263 191 180 229 
257 90 131 340 408 289 28 
63 432 453 309 104 269 
272 352 195 47 180 257 297 447 
257 138 15 131 134 55 173 
269 191 438 40 224 336 257 281 
438 91 497 134 127 142 36 
455 104 340 483 179 47 62 429 458 129 
420 462 426 416 458 204 
269 346 460 474 62 489 130 309 319 
455 104 340 483 269 346 72 181 458 129 
455 497 273 104 265 309 205 458 129 
159 11 127 99 381 203 257 217 
455 103 269 462 453 309 59 
455 104 340 349 394 327 
257 409 462 251 309 456 185 418 
269 287 271 289 146 
132 63 284 319 189 
242 388 189 234 41 489 
265 462 426 392 103 309 314 286 453 
179 129 179 250 340 487 242 33 
63 151 234 62 223 137 
265 35 191 251 156 
208 458 468 87 
257 370 164 109 175 64 257 222 
269 346 474 309 127 265 130 
257 465 250 271 367 68 
95 295 191 322 192 
30 383 215 22 491 
458 462 453 309 47 265 51 
351 311 189 174 260 
63 4 134 38 63 284 134 
231 250 185 448 
347 46 104 340 47 394 336 493 185 46 106 474 62 165 
179 131 134 177 199 261 205 309 188 265 
265 346 257 392 130 309 187 269 
132 269 284 340 384 264 
428 336 205 63 104 340 
72 44 191 129 309 127 308 130 
406 457 155 144 257 91 346 417 
269 191 340 58 231 129 
455 483 242 247 11 104 265 
455 124 309 282 257 400 309 104 257 97 
269 462 257 291 263 458 129 
265 351 474 300 475 286 
455 83 265 63 497 
257 178 431 340 362 46 
257 476 169 495 68 
455 202 24 309 305 269 
132 458 204 258 462 189 257 130 
455 103 179 19 174 263 
179 151 343 257 482 
265 346 310 336 257 165 458 129 
31 175 495 
92 191 271 367 138 68 
332 466 191 316 
458 346 474 286 309 242 369 
455 250 423 309 104 458 129 
458 191 427 203 496 114 456 34 38 462 256 445 56 370 133 
269 131 134 153 257 433 
84 179 47 271 293 309 127 
133 128 271 327 
257 243 250 152 306 
227 185 250 64 257 482 
46 104 340 282 9 265 325 32 
458 129 231 88 257 51 190 23 257 241 
347 46 104 340 197 245 46 432 134 453 309 472 269 
242 389 462 340 372 337 
257 154 66 175 214 226 271 345 
265 346 199 179 131 
14 151 493 400 
159 22 251 53 
271 289 28 22 318 
179 104 340 47 317 
455 47 309 188 455 4 305 265 397 
63 104 134 47 394 336 265 84 
13 454 22 226 300 379 62 396 
132 201 397 462 446 
38 455 104 340 362 309 71 
265 346 134 257 369 
269 202 134 127 257 451 33 
265 191 174 165 405 
455 103 458 11 127 198 309 2 242 260 
455 47 340 249 174 387 
455 131 340 483 179 497 
257 35 191 340 372 337 
455 19 257 393 
455 124 309 396 269 254 92 132 231 191 351 41 357 
458 346 474 62 416 
455 362 309 2 412 257 392 400 203 257 424 
63 432 45 337 309 201 29 
455 131 257 291 263 
455 250 309 282 254 336 92 458 129 
231 316 269 309 257 40 447 336 257 186 486 
455 103 269 346 351 270 397 
257 406 232 155 142 
63 11 134 244 265 130 458 129 
257 451 11 127 456 
63 471 340 197 245 84 
246 329 47 64 257 482 
455 11 127 277 
257 409 462 251 309 456 252 105 
63 131 340 315 257 243 
257 12 170 250 271 367 68 189 257 91 
455 483 269 316 62 50 477 
269 346 271 446 84 458 129 
179 151 496 458 129 
455 293 309 244 428 33 245 
458 88 257 97 130 
455 104 134 188 92 11 127 394 327 
242 462 426 451 270 
257 170 175 316 271 68 3 257 419 
460 269 462 172 98 227 257 327 
241 104 340 362 309 408 485 189 13 140 
493 159 151 251 374 34 
46 282 62 391 336 493 
269 346 257 416 336 426 424 
179 129 179 22 67 337 
341 133 353 289 68 
347 63 4 282 383 336 257 375 269 11 127 50 
215 133 353 309 68 
63 4 134 319 189 24 242 
63 460 47 275 63 47 309 311 254 
257 341 278 309 160 
84 455 113 340 188 257 393 
269 346 311 458 129 
370 133 129 179 250 271 367 68 
455 351 293 62 357 447 
269 462 62 382 181 
231 88 257 334 379 68 
377 76 120 436 
455 358 47 309 315 62 496 210 
242 330 250 357 146 458 129 
269 346 33 309 305 428 375 
132 257 159 22 257 97 
455 104 340 483 179 432 453 309 19 265 89 227 
332 28 22 309 127 209 301 
257 439 47 79 309 319 309 444 208 
132 423 462 24 242 
455 47 134 306 269 344 
231 353 309 408 394 289 146 
269 483 269 346 62 357 168 
210 230 319 189 475 264 
455 362 309 127 351 24 265 
38 234 257 370 366 393 265 346 357 
179 22 209 229 
455 362 309 282 269 469 415 
139 22 306 469 
465 133 497 134 127 180 234 68 
38 126 434 250 317 
227 193 189 383 448 
46 288 362 309 218 254 189 136 
458 202 134 408 289 28 
201 393 175 182 383 375 
241 351 362 309 127 88 203 459 
496 114 175 17 377 336 212 
458 191 134 142 
179 151 134 486 309 257 398 
438 153 175 134 152 209 
257 328 307 367 221 
179 131 257 291 118 154 129 
269 11 244 378 458 73 
458 11 214 25 484 
242 497 134 127 142 36 56 419 390 
179 131 134 244 394 466 475 173 
455 96 188 265 
63 47 309 319 415 199 63 47 
270 131 340 372 166 485 
92 151 340 265 139 
215 202 340 417 29 28 
84 269 346 332 101 
347 455 145 62 172 71 455 145 62 172 71 
341 133 497 134 127 180 234 68 189 257 91 
455 86 455 104 340 288 166 269 
132 265 191 134 257 443 264 
455 358 408 269 174 392 437 
63 460 47 340 356 426 260 
63 151 351 133 
458 214 129 257 465 11 160 
455 131 340 293 434 
455 258 257 341 
163 22 272 195 38 383 16 
269 346 257 291 118 309 104 
269 346 62 67 107 270 
467 26 457 155 
45 455 202 24 309 2 264 
458 175 134 344 152 116 
257 297 443 191 128 203 257 97 389 229 
458 346 62 50 81 458 129 
455 191 8 309 314 485 415 199 455 131 456 217 
458 346 288 152 24 242 
458 17 438 387 
46 113 340 282 300 475 269 
455 163 174 317 231 468 390 324 231 191 427 
215 129 435 482 22 214 58 
265 346 62 50 393 
63 460 47 62 259 309 104 264 
265 346 227 455 362 309 86 
92 11 127 271 289 68 
455 497 104 265 405 
257 424 321 462 446 
265 346 351 257 130 458 462 
231 431 340 47 309 104 265 
265 346 152 50 
265 191 212 492 18 
269 191 438 263 231 129 
257 443 462 84 189 160 
455 131 340 362 309 86 
455 104 340 86 199 13 165 462 
38 63 106 474 309 59 269 
455 483 265 346 274 458 129 
462 92 30 130 
265 284 340 127 62 165 242 115 
455 202 47 309 315 469 
257 311 11 315 242 34 
458 11 127 73 374 115 
265 443 462 308 160 
133 177 269 11 244 383 309 185 418 
179 4 134 71 257 338 
246 257 91 38 257 91 
132 455 110 269 497 258 184 254 
257 297 413 191 332 372 
458 131 134 68 189 438 278 
257 383 151 256 445 203 496 114 
186 133 129 269 191 41 176 309 177 
132 405 92 462 271 341 
179 214 129 271 270 191 491 
46 351 474 309 311 414 269 
271 452 123 191 142 128 
257 409 250 152 54 309 315 189 156 
257 91 497 134 127 142 36 56 390 
179 131 340 362 394 15 
215 129 179 250 271 289 146 
366 476 462 30 
63 86 14 11 305 
132 458 202 340 177 332 
455 182 62 357 397 
455 131 340 71 234 257 424 168 
257 90 191 382 229 38 271 270 497 127 180 234 68 
84 63 47 309 305 383 
242 462 240 357 240 455 4 2 458 129 
458 495 309 408 438 153 309 87 
458 468 257 407 
455 296 453 309 6 38 104 269 32 231 129 
455 288 47 103 458 129 
257 222 497 134 127 36 
455 86 257 130 179 2 
257 370 164 109 64 265 
38 265 497 244 492 
458 191 427 185 105 381 
455 497 340 349 269 
455 483 458 4 104 265 
269 191 62 489 270 41 
92 191 271 367 213 68 
347 455 497 340 244 173 455 202 340 319 231 129 
92 191 271 270 203 257 303 
179 151 17 309 13 329 347 179 104 134 65 458 129 
458 129 458 202 160 53 346 295 
455 202 340 59 269 234 257 424 
132 63 4 59 269 
176 57 269 191 476 
458 462 256 445 203 257 425 364 
63 432 8 309 311 254 227 257 28 
10 122 25 304 208 
92 346 310 336 184 265 202 24 309 127 62 310 336 269 
186 93 36 257 207 
257 477 129 383 410 22 163 
265 122 134 127 196 336 62 463 
38 244 269 475 92 
179 358 282 30 429 242 217 
63 106 474 309 282 485 38 319 
455 113 340 483 336 438 153 270 204 309 257 29 
265 175 134 152 257 76 130 
455 362 309 258 257 393 
464 28 22 99 
63 432 8 309 282 205 254 458 129 
455 296 134 453 309 472 265 477 
266 241 22 491 
257 425 364 250 271 367 68 
132 265 346 270 117 260 63 362 309 305 
455 483 179 47 357 434 458 129 
455 351 108 189 173 
265 462 199 380 364 362 
257 393 462 460 379 62 211 81 
144 227 179 106 124 309 244 438 210 
199 346 438 101 
63 104 340 188 179 47 
231 356 265 38 332 
257 383 433 353 309 68 189 257 477 
269 131 340 55 173 
155 191 92 41 
63 284 340 408 485 103 458 129 
458 131 134 153 257 342 
269 404 234 80 189 257 181 
63 47 309 2 451 
269 191 214 438 456 
46 47 309 305 439 375 
179 445 80 265 22 382 309 257 326 
458 497 340 314 485 
265 462 199 46 483 
269 346 134 199 63 473 132 269 346 62 357 297 
170 133 495 309 68 
134 125 266 478 177 
231 129 89 257 384 
63 151 62 50 434 
242 335 462 257 325 
257 338 235 175 
132 458 4 71 257 166 
347 257 159 151 134 357 455 358 319 
242 462 62 357 118 
269 346 134 62 409 412 184 458 129 
231 346 218 197 189 136 
455 351 4 134 177 
62 302 299 495 309 68 189 438 102 
458 381 88 257 338 
269 346 227 37 423 458 129 
231 497 134 68 289 
328 292 250 271 367 68 
132 257 215 47 226 271 345 
455 362 309 349 199 346 189 269 
38 179 432 257 392 
269 462 340 426 411 
189 376 458 436 
151 63 453 309 55 
257 416 11 127 234 242 178 
45 63 388 189 265 
390 47 209 323 146 268 257 44 
269 346 62 117 118 458 129 
456 115 257 42 191 252 
265 346 257 117 165 458 468 257 359 326 
455 106 404 173 475 264 
383 492 381 458 306 257 370 486 
269 191 340 233 441 
458 346 250 62 50 115 
405 191 265 441 234 286 
455 11 311 234 257 416 458 129 
465 133 202 340 68 
347 179 104 340 257 248 11 319 144 205 
455 468 205 455 473 309 104 269 
460 269 346 270 260 
179 182 351 383 375 
455 296 220 89 269 
179 4 456 62 34 
458 131 134 417 394 332 28 
132 63 86 179 113 340 408 286 257 354 63 362 
415 174 311 455 104 340 349 257 293 309 315 62 387 
63 131 340 282 9 28 
271 332 80 22 142 54 
383 434 47 152 427 203 257 443 
269 131 340 408 289 28 
45 63 358 351 47 309 349 
46 497 340 55 269 
455 351 362 309 104 269 
60 269 257 395 324 257 395 
257 476 169 131 134 142 68 
270 43 191 491 
212 434 22 163 
458 204 458 11 134 486 72 44 
269 346 271 357 309 257 398 
63 86 242 462 257 130 309 319 
63 351 362 72 384 309 227 242 
269 462 256 209 156 
455 296 453 309 104 269 32 458 204 
132 265 346 62 357 118 
62 295 462 251 242 217 
455 473 309 282 236 257 451 447 231 129 
458 462 460 256 445 
455 351 362 309 408 286 62 429 309 305 
458 284 47 152 172 
143 375 11 319 189 458 129 
132 269 346 134 227 357 350 
257 341 129 269 202 160 257 295 
458 351 131 340 71 
455 296 453 309 6 269 231 129 
132 269 191 273 24 242 
38 455 483 265 191 257 392 82 336 257 217 
409 462 54 234 381 242 34 
84 265 497 59 
257 160 191 361 56 257 334 
458 129 269 191 270 336 257 392 105 336 438 210 
242 462 257 425 364 
179 22 340 251 62 118 
455 11 121 309 104 174 311 
92 346 423 63 4 104 268 265 20 255 151 257 392 
458 41 250 270 336 493 105 
242 462 62 357 378 309 104 269 
269 471 340 127 13 456 
89 257 97 33 458 462 496 309 286 
63 104 340 293 205 
455 104 340 483 455 202 177 265 458 129 
269 346 72 107 310 336 257 90 154 129 
13 102 191 134 274 
265 346 271 117 401 
227 174 387 312 47 218 254 
92 11 127 271 289 80 
257 225 11 315 374 115 
455 191 67 323 231 129 
265 462 41 489 458 129 
269 214 175 52 173 309 244 245 
63 106 250 271 258 475 257 341 
269 11 127 182 171 
63 151 134 257 215 
455 351 483 242 462 291 
63 47 257 93 63 293 309 104 257 259 458 129 
257 425 364 131 340 160 412 257 263 
271 345 175 152 226 
265 497 127 62 165 234 227 336 286 458 129 
338 175 288 152 62 391 24 257 406 137 458 129 
458 431 340 47 62 168 
299 159 151 309 127 322 381 242 34 
38 455 106 152 145 324 
460 231 278 309 319 32 
257 21 131 134 68 142 
31 346 21 285 250 271 68 
63 293 258 240 62 393 
269 191 62 391 336 323 275 265 474 309 286 
246 433 495 309 68 189 257 222 
458 131 340 472 269 
14 346 453 309 258 
185 434 47 436 242 217 
257 159 11 127 322 229 
271 327 250 152 128 229 
231 273 64 269 
265 175 273 152 257 443 
38 455 296 134 453 309 408 485 189 173 
132 242 462 134 45 
284 340 104 265 
455 47 62 118 309 104 458 175 62 118 309 104 
455 104 340 188 265 
269 191 257 49 397 192 
215 202 340 417 394 28 
265 346 13 378 
257 341 204 269 175 271 466 
455 351 473 309 25 257 140 
269 462 423 46 4 75 
458 129 458 251 257 374 407 309 127 445 203 268 62 217 
46 351 250 309 127 92 
269 462 134 426 259 309 104 242 
257 401 462 251 309 337 381 242 115 
231 129 458 175 257 291 309 160 
428 129 179 497 
438 409 462 54 309 486 374 34 
269 191 134 274 69 458 202 
458 175 129 458 202 24 309 82 309 257 425 364 
242 462 62 223 137 
269 214 202 134 417 233 153 
72 419 462 54 234 374 115 
84 458 471 340 349 233 89 227 
455 351 104 340 104 265 
423 462 453 309 127 318 
460 92 22 62 464 
455 483 458 11 396 234 269 
14 11 104 242 259 
132 269 191 340 142 99 347 265 191 58 
84 92 346 62 165 
459 462 268 59 231 129 
29 149 64 265 
458 436 379 62 396 
215 250 271 367 146 268 257 207 
269 287 271 367 28 336 482 412 205 
458 129 458 131 340 483 268 450 
341 133 495 309 68 156 
242 122 134 288 127 58 
455 104 340 483 179 293 184 458 129 
455 106 152 414 62 391 458 129 
257 456 437 7 189 260 369 
179 11 127 124 229 
242 462 199 455 47 
206 133 131 134 142 65 62 60 371 68 
455 296 453 309 48 205 
455 103 46 11 19 184 84 
63 432 134 453 309 55 264 458 129 
458 193 309 265 41 
257 341 191 54 309 160 265 295 301 
269 191 227 310 336 257 411 458 129 
458 129 257 465 202 134 68 289 
269 191 62 61 165 458 129 
242 466 230 319 197 9 257 239 
132 92 151 327 
231 57 64 265 
458 462 475 496 114 
458 191 134 404 189 192 
38 63 362 309 305 
458 473 332 28 
46 305 415 434 
132 92 191 323 247 189 14 306 
455 17 227 336 205 
234 257 126 310 179 104 340 362 46 309 86 14 179 151 
132 63 104 340 47 33 291 84 
46 351 104 340 55 
455 358 349 199 462 392 234 174 434 
132 265 191 383 105 18 
341 133 497 134 127 180 234 68 189 257 222 
455 106 474 387 264 
257 170 202 134 68 189 257 91 
132 265 431 340 408 233 62 291 309 71 
92 191 271 130 231 191 8 309 282 300 
257 341 431 134 362 242 
428 176 159 22 251 53 
269 191 62 357 281 
242 115 462 271 446 
92 462 271 354 
257 401 191 251 309 127 322 301 
171 191 271 446 
455 351 182 174 27 260 
269 431 340 288 311 351 291 
455 191 343 234 62 259 
265 113 340 127 64 
63 27 423 458 129 
455 131 340 47 269 220 89 265 369 
455 483 265 346 62 126 107 118 
269 346 13 165 458 129 
46 432 62 74 
45 139 434 362 309 349 286 
365 133 129 271 263 175 152 316 
63 104 340 483 265 346 257 443 
95 26 84 462 252 440 
179 495 309 408 332 28 
179 131 134 188 173 
460 154 462 291 203 8 
439 29 434 22 209 
31 204 269 230 314 227 336 257 140 
390 495 269 212 418 381 
269 191 62 50 217 234 184 231 129 
92 191 271 289 146 
458 346 62 387 330 
257 383 22 427 332 23 383 492 18 
215 131 134 142 417 394 289 28 
257 283 303 175 64 242 
484 462 460 62 67 357 393 
134 434 458 129 
455 129 455 202 47 309 282 354 309 244 205 254 
92 462 271 237 118 458 129 
132 458 448 309 30 107 181 
174 101 11 319 189 379 205 
63 131 340 372 6 309 2 242 130 412 484 
231 468 257 359 326 
242 191 134 257 451 447 
269 191 129 252 492 18 
341 133 214 64 265 207 250 226 378 
269 346 270 336 493 275 
455 202 47 187 485 62 396 
63 293 309 408 205 199 179 293 
31 129 179 202 127 445 171 
257 247 462 220 
475 335 92 191 271 165 
63 293 309 244 426 33 
455 110 455 250 356 270 
179 151 220 234 62 387 
394 393 4 2 270 50 260 
4 46 408 184 394 146 189 269 
92 462 72 44 257 169 129 
179 47 134 152 116 344 
179 131 340 86 286 
257 44 497 244 266 418 
458 346 288 182 
458 73 458 11 127 223 
63 351 104 426 27 118 
132 269 191 214 357 
265 202 127 50 458 129 
269 230 59 84 
257 419 462 54 234 442 374 115 
32 257 91 497 134 127 36 
150 462 251 309 35 189 257 403 156 
264 151 28 189 428 336 205 
132 92 191 332 
231 129 231 278 309 314 220 
265 346 257 130 309 104 269 
257 368 11 70 
269 131 134 177 69 394 22 356 
92 346 460 343 
63 47 309 311 257 327 254 
390 47 209 323 146 268 257 443 
257 169 129 203 62 477 
455 104 340 362 269 458 129 
126 22 209 144 62 464 105 
132 265 346 453 309 59 
480 129 269 497 340 104 265 
179 230 218 254 38 35 
383 434 436 38 252 241 22 491 203 257 207 
271 270 175 344 152 116 
269 191 62 50 441 
242 175 152 270 336 205 
132 458 129 257 195 22 257 126 107 348 
455 96 110 174 210 191 453 309 429 
63 104 134 362 309 244 269 197 309 225 
257 21 285 353 68 
269 191 62 357 437 38 455 131 340 483 458 191 453 309 282 485 
271 29 28 22 318 268 173 
269 462 235 161 
269 131 134 408 289 28 336 257 247 
458 11 315 229 346 397 
455 47 309 2 174 392 
132 269 490 41 442 234 265 
458 214 495 309 267 205 
203 422 370 133 214 64 257 91 
14 462 453 309 127 374 
455 474 275 455 474 309 104 
132 231 462 134 257 49 270 
257 241 214 119 409 
31 346 470 169 250 271 68 
92 346 423 357 
455 104 340 86 199 96 462 453 189 
139 79 234 258 
84 92 462 62 341 
269 175 152 62 50 71 
455 110 458 202 218 254 343 
265 230 127 62 168 
246 400 250 152 491 234 257 451 397 
257 330 191 209 144 383 418 
63 432 8 309 311 269 254 458 73 
455 191 8 309 75 257 181 458 129 
458 495 289 68 
46 471 340 47 309 483 268 269 
458 250 134 344 152 124 189 493 482 
269 346 415 174 387 
257 328 64 257 482 
269 346 134 62 281 
179 47 62 67 357 393 
269 462 257 451 265 434 47 152 52 309 35 234 
242 462 50 350 234 286 
458 73 265 72 44 191 308 130 
269 175 474 309 59 
269 191 257 297 441 336 80 
46 104 340 86 14 346 453 309 47 13 441 
269 346 134 62 260 458 129 
63 227 47 257 97 224 
63 151 134 453 309 104 265 
63 47 271 165 415 257 425 364 
269 346 412 257 248 231 129 
132 269 175 271 99 339 313 
257 159 22 322 144 257 137 382 
227 63 4 104 462 426 392 
203 394 443 269 11 127 62 393 415 62 496 81 
63 4 134 47 270 379 257 29 
455 104 340 362 332 33 458 129 
458 191 427 381 56 215 
84 63 47 309 82 189 
257 277 462 257 338 346 136 494 
341 133 497 134 142 127 180 
257 409 462 251 309 456 439 105 
13 416 462 134 274 
269 373 134 311 234 46 
455 284 47 99 
455 11 127 197 458 129 
179 131 340 472 265 139 
179 113 340 104 265 309 434 
159 22 251 376 
132 455 47 134 17 233 
179 202 340 96 86 
455 106 474 174 429 
383 492 381 179 94 343 341 93 
63 47 340 318 485 231 129 
458 131 340 408 394 29 28 
132 269 175 273 152 62 452 354 181 
63 432 453 309 2 426 260 458 129 
62 409 334 193 
92 471 340 127 459 
423 4 127 265 337 154 129 
63 4 104 379 205 
257 365 353 394 289 68 
269 191 257 49 130 458 129 
92 462 271 459 309 314 
179 202 47 474 269 
169 133 497 134 142 127 180 234 28 
277 10 175 129 458 462 234 265 
269 346 257 392 315 336 174 210 
13 221 22 322 53 
28 250 340 152 209 
257 451 447 462 156 
126 351 362 309 282 269 469 415 
265 346 397 2 
257 243 94 383 105 381 
231 191 52 309 314 269 
92 191 271 59 
257 465 64 257 482 
455 351 474 309 282 414 242 458 129 
455 104 242 203 29 329 
458 191 251 309 160 257 295 
455 11 134 319 172 
458 346 270 336 257 387 
28 22 309 127 322 301 
257 370 170 250 271 367 146 189 72 207 203 265 389 
62 40 38 395 35 462 161 234 374 217 
347 269 431 340 269 346 254 
179 177 269 346 134 453 309 456 
63 104 340 86 257 416 458 73 
242 462 134 62 341 
132 265 191 422 346 456 348 
265 462 274 458 129 
242 462 257 130 336 257 424 
265 11 134 127 62 165 415 62 277 154 
455 103 62 391 336 275 
265 346 257 130 269 346 288 152 
63 432 134 62 370 465 458 129 
231 497 47 163 32 
257 44 462 453 189 
28 336 1 346 411 47 134 152 209 
257 409 191 257 297 234 246 195 
132 458 214 129 455 104 340 349 242 240 62 452 165 
242 462 257 392 488 458 129 
455 11 319 309 438 303 
455 191 468 242 462 62 168 
455 104 340 293 205 
132 269 346 460 41 176 309 60 
92 284 127 223 221 
56 248 458 4 134 71 32 
257 160 462 125 309 244 418 
455 250 309 71 174 27 294 
92 22 271 317 
458 250 271 68 192 
179 273 129 179 473 339 454 
257 215 129 271 270 191 427 37 491 
63 47 72 44 309 319 414 458 129 
257 225 94 456 192 38 462 54 309 384 242 192 
257 166 462 203 95 395 281 
438 90 497 134 142 127 180 234 68 
221 455 11 47 309 104 269 
63 432 8 309 305 254 257 281 
257 343 175 200 
62 263 462 251 156 
46 47 309 282 111 309 220 415 434 458 204 
63 131 340 362 269 309 315 265 130 132 269 175 
4 455 305 257 294 
257 241 22 216 133 
132 455 460 474 145 
246 151 84 382 
455 96 104 340 483 63 432 453 309 47 196 336 62 59 458 129 
63 47 309 127 203 320 458 129 
269 346 134 58 458 129 
493 151 257 275 63 113 340 320 458 73 
269 346 257 49 118 265 346 88 
269 346 62 165 336 61 11 458 129 
383 434 436 38 377 241 22 491 
257 44 497 244 266 105 
269 497 134 197 280 
481 221 151 54 234 374 115 
335 269 346 58 
458 462 84 494 336 257 328 
455 104 340 2 265 458 129 
269 346 72 486 137 
455 191 340 198 309 104 265 
92 151 271 237 278 458 129 
455 113 340 104 394 336 265 
246 329 47 64 257 222 
458 436 53 144 458 191 226 245 210 19 
257 465 322 
203 265 443 63 131 340 
458 183 242 291 300 475 286 
92 191 271 299 215 477 
265 191 340 257 443 456 115 
257 162 191 251 309 127 200 301 
257 477 131 134 408 394 289 28 268 257 407 
455 104 340 86 199 269 462 458 129 
215 250 271 367 28 
159 22 251 442 376 
179 151 54 309 127 124 374 34 
29 23 265 92 191 423 
265 346 257 130 257 393 11 121 309 2 
257 299 436 171 
455 273 129 265 458 129 
294 377 462 54 234 376 
179 495 309 68 289 
63 230 84 104 426 310 
455 86 205 38 455 460 104 340 24 205 
332 462 189 257 130 
242 462 233 42 
133 92 495 309 68 
465 133 497 134 142 127 180 234 68 
265 346 288 152 174 224 38 265 346 174 224 242 217 
63 351 7 254 336 62 243 
257 330 436 229 
455 4 134 355 62 215 75 458 129 
63 47 309 104 269 32 
265 346 257 130 269 346 152 227 242 115 458 129 
334 133 353 309 68 189 257 443 
257 35 462 251 309 244 378 192 
179 22 134 357 415 286 
242 462 257 49 130 
455 296 273 453 309 408 485 458 129 
32 269 497 340 
132 265 122 59 
231 11 134 24 309 349 269 
132 462 269 257 384 336 257 424 
265 346 152 257 443 242 217 
62 470 169 285 495 309 68 
231 204 269 346 220 
458 129 92 202 127 72 44 
231 131 134 177 69 394 454 22 356 
458 473 309 384 269 
45 455 191 371 62 59 
455 296 203 62 50 378 
269 191 134 99 14 163 257 195 
92 151 62 391 336 434 14 362 459 264 458 129 
62 263 191 251 240 176 240 257 384 336 257 34 
458 175 129 458 250 423 309 104 415 257 207 
269 346 134 453 309 55 458 129 
265 122 127 310 336 13 165 
132 455 483 265 191 257 291 263 
269 471 340 127 24 257 451 383 375 
460 92 462 332 
104 63 362 309 305 242 260 
341 15 151 214 92 
347 92 346 394 130 458 4 2 458 358 2 
215 497 134 127 180 442 53 234 68 
132 231 175 273 306 
63 106 306 493 375 
30 407 191 445 229 
460 92 284 127 271 165 
257 215 109 353 309 68 189 257 295 
132 265 346 134 257 443 
455 358 47 309 483 268 269 458 129 
132 175 458 306 205 469 
455 94 309 282 269 458 129 
231 191 381 52 309 319 
257 425 364 214 183 310 
458 307 309 305 269 
63 47 309 305 203 31 
28 22 251 309 127 318 203 62 350 225 381 203 257 441 
465 133 497 134 127 180 234 68 442 301 
63 11 47 309 397 205 32 
270 330 175 436 336 269 
455 473 309 305 257 396 
46 362 309 305 257 397 
199 346 257 164 336 269 291 84 
269 131 340 47 309 127 24 242 
265 191 310 336 257 165 
203 257 489 71 269 11 134 311 458 129 
455 483 269 202 258 286 458 129 
275 293 309 59 
11 179 19 173 
246 353 68 
257 407 191 54 309 121 192 
458 129 227 439 47 79 309 319 309 444 208 
63 11 47 309 319 309 257 425 364 
455 104 340 486 242 
257 341 57 129 179 47 249 271 59 
257 91 214 356 265 
257 425 364 175 404 234 438 417 
257 91 497 340 127 36 
460 265 122 134 127 257 384 336 257 181 
104 179 60 257 215 
269 462 251 309 71 254 203 257 374 34 
43 133 361 257 128 411 
455 110 174 33 250 235 218 
455 296 453 309 314 173 
458 351 131 340 24 269 
455 358 273 408 485 
227 185 22 226 300 56 215 
133 495 309 68 189 257 222 
132 92 191 423 309 104 
257 33 462 291 231 129 
179 353 68 
257 370 341 131 340 142 68 
269 462 257 451 441 336 257 496 115 
242 462 426 33 309 472 426 477 
215 214 209 271 28 
63 250 423 309 104 415 265 458 129 
265 346 62 446 260 
438 102 175 134 152 209 
257 297 11 127 445 192 
132 497 269 127 185 492 
257 467 180 257 297 447 234 257 451 33 
246 22 427 
140 133 497 134 142 127 180 234 68 
269 346 107 309 104 265 
257 80 22 54 309 456 270 217 
231 346 220 189 269 
132 269 471 340 311 32 
458 250 271 146 189 438 102 
257 341 175 129 269 250 152 54 234 456 192 
460 478 129 257 406 191 62 357 401 
179 113 340 71 300 
92 346 271 29 130 309 305 
269 346 62 260 231 129 
231 129 231 202 134 472 237 62 477 
179 473 309 127 76 
132 265 346 199 455 349 
269 191 257 456 118 455 473 309 104 
455 202 340 372 177 269 191 357 
265 191 340 62 263 309 472 458 129 
434 362 13 466 
455 104 340 188 265 63 284 408 485 189 242 181 458 129 
242 419 462 446 475 456 33 
257 70 346 91 175 134 152 316 398 
269 373 47 152 41 196 33 
415 257 186 393 269 462 273 469 
347 269 431 340 311 254 269 351 431 340 311 254 
395 159 22 134 251 487 376 
80 151 251 309 315 381 242 115 
92 346 62 496 494 
455 351 362 309 2 227 257 33 
383 241 47 382 
458 250 309 311 234 269 132 458 474 269 
257 409 462 125 309 127 489 
269 346 62 101 458 129 
2 462 54 309 121 301 
458 191 427 185 418 381 
269 346 24 453 254 
265 202 127 257 384 
265 346 257 488 
132 478 460 177 92 462 62 489 130 309 319 
458 353 394 289 68 
63 284 47 250 242 260 
257 465 131 134 65 62 60 371 68 
63 47 271 48 336 269 
458 129 458 250 340 249 205 324 
63 432 453 309 127 257 392 393 63 4 127 374 115 
185 29 120 22 491 
455 104 134 483 269 462 33 309 104 265 
455 483 458 11 6 309 305 
265 191 251 203 257 374 464 105 
458 497 47 111 269 
301 346 375 
257 443 462 134 382 
376 191 62 323 336 246 
455 104 340 362 309 177 63 106 316 62 263 
257 12 21 131 134 68 142 
257 133 131 340 142 472 62 60 
257 325 462 308 320 458 129 
63 110 265 63 250 62 391 336 19 458 129 
269 346 33 309 51 
63 432 8 309 305 
215 129 13 44 202 121 
458 468 257 359 326 
458 346 257 49 270 14 497 55 184 
269 346 134 257 425 364 
132 179 497 134 349 394 77 
347 455 4 104 265 455 483 455 358 47 62 429 
144 265 458 191 189 438 27 
332 80 22 54 381 203 257 441 
455 47 273 249 233 2 24 265 
63 104 340 47 394 466 
390 497 134 127 142 180 234 68 
16 250 309 319 415 173 
257 241 202 127 209 381 
455 110 62 489 33 
179 104 340 47 309 
63 151 198 309 311 415 173 38 458 462 198 309 258 415 438 476 
132 455 106 474 309 127 189 136 336 174 260 
132 62 170 285 64 265 
179 358 351 6 32 374 217 
271 270 11 258 184 
132 269 191 134 379 327 
269 346 474 309 127 265 357 
46 4 273 408 485 458 129 
257 425 342 495 309 197 280 
269 346 62 446 78 
132 242 91 462 270 179 187 269 254 324 
265 346 96 107 
57 242 4 134 127 251 
257 186 341 175 495 
458 250 309 104 269 227 38 458 131 
265 346 271 357 231 129 
132 269 191 340 394 117 401 
72 21 285 202 134 68 189 257 91 
265 443 462 382 
299 159 151 251 381 242 217 
92 11 127 43 215 
246 151 67 107 309 257 393 
92 47 152 402 327 324 
439 29 120 22 491 
455 191 340 198 309 104 394 336 265 231 129 
62 263 497 218 176 192 
179 47 152 209 
179 131 340 408 394 29 28 
95 91 497 134 142 127 36 
179 483 179 151 257 392 
242 431 134 293 309 319 189 
257 409 462 251 309 456 487 257 384 336 257 217 
57 257 141 346 91 204 
347 458 346 134 458 460 175 62 429 
458 250 134 344 152 356 
465 133 353 68 192 
455 191 257 216 330 
265 91 175 273 152 36 56 390 
269 191 13 297 407 242 115 
257 181 388 309 257 140 368 
92 462 270 441 88 203 257 115 
43 133 250 271 367 68 
269 202 340 127 291 
377 434 47 152 163 242 217 
271 80 47 152 445 3 456 34 
242 462 340 228 205 
458 11 104 438 259 
455 474 269 254 336 174 488 
458 129 179 131 134 91 394 327 
92 191 271 68 475 257 370 170 
265 348 131 134 456 489 
179 432 453 309 104 184 291 
269 346 270 336 493 275 458 129 
451 159 22 251 442 376 
63 151 8 309 320 257 325 458 129 
269 191 62 357 2 189 438 310 
455 104 340 47 62 259 458 204 
439 124 324 173 
269 462 460 62 489 130 458 129 
269 131 340 311 254 405 
271 160 462 58 144 192 346 295 
269 191 134 274 20 257 343 183 378 
63 7 254 189 136 
242 396 346 134 469 
62 263 462 251 229 
257 409 462 251 309 121 414 257 217 
458 131 134 408 28 336 233 102 
428 177 269 462 33 309 59 257 248 
46 293 309 127 117 
458 462 62 148 299 415 257 424 365 
257 49 118 455 4 104 462 104 174 259 487 179 55 269 
179 287 269 309 184 
487 242 217 458 191 62 473 330 
347 63 4 258 63 11 231 129 
257 164 278 309 314 252 440 336 257 465 346 279 
269 346 257 101 
269 353 68 301 
269 191 134 99 347 458 131 265 
92 462 271 160 
46 293 309 2 62 333 260 
13 160 462 251 309 244 266 418 
383 448 151 107 264 
38 269 122 71 38 71 
242 191 251 374 34 
455 86 199 346 453 309 127 251 336 184 
269 191 134 274 199 373 47 261 309 257 207 
265 191 257 395 160 
92 346 271 130 63 4 104 265 
265 346 257 165 
46 22 62 496 424 
231 462 134 54 309 267 415 341 292 
458 388 189 309 305 257 260 
455 4 134 282 269 254 
179 432 227 174 317 
458 4 127 62 117 258 
132 46 47 309 82 189 
215 129 271 270 191 491 
62 263 191 251 53 
63 497 472 466 379 96 8 
383 29 434 22 427 381 
455 483 455 131 265 
257 383 195 151 309 267 32 229 
63 251 173 309 104 45 
215 47 495 309 417 394 28 
132 455 437 62 357 447 405 
132 231 316 485 126 336 257 17 33 
38 265 346 453 309 244 418 
257 425 364 462 238 
455 202 351 6 309 401 415 269 231 129 
265 191 62 50 260 
265 346 257 49 118 455 4 177 
257 365 381 64 257 91 
63 4 104 275 264 
455 483 269 346 453 309 127 62 357 294 
269 129 257 494 191 427 456 115 132 287 271 289 28 
132 455 483 458 346 474 62 416 
38 265 175 134 288 152 257 443 
30 407 11 127 445 374 217 
455 473 309 2 264 458 129 
242 462 62 243 147 462 453 189 458 468 87 
269 462 257 11 336 426 434 
231 129 458 202 396 257 482 
269 346 257 488 458 129 
231 495 309 68 289 189 257 443 
257 389 175 152 67 357 309 184 458 129 
455 473 309 121 309 2 458 129 
455 273 110 179 202 104 265 231 129 
179 151 45 39 
84 455 11 35 234 173 
46 47 309 362 309 305 458 129 
63 4 349 265 203 257 496 
455 104 340 24 199 46 131 
455 104 340 86 14 131 269 458 129 
257 326 141 79 
269 191 340 99 347 458 202 160 
269 346 152 265 130 234 62 489 33 
455 104 340 362 309 319 197 231 204 
347 63 497 258 63 202 132 63 4 104 423 
458 214 129 458 473 309 218 172 
364 104 340 47 309 104 242 458 129 
269 346 257 49 378 455 86 
455 104 340 483 242 462 72 181 
351 423 388 309 411 
257 407 462 54 53 
370 133 497 134 127 180 156 234 68 
455 131 340 86 265 231 204 
481 221 151 161 234 381 242 115 
84 462 257 33 309 19 257 393 
215 202 134 142 68 
231 316 257 126 336 269 
455 104 134 86 265 153 
458 191 251 309 127 209 56 156 
455 104 340 483 455 202 47 316 269 
215 129 30 206 250 163 173 132 287 271 289 28 
455 351 47 309 82 189 
455 106 152 8 309 282 146 458 129 
132 120 131 423 
257 409 462 251 309 244 383 105 
390 250 271 289 28 268 265 450 
63 293 309 121 143 
455 6 309 314 453 
63 471 340 55 205 
458 129 231 11 273 349 32 
63 293 309 121 80 268 257 206 411 458 129 
257 466 462 45 117 458 129 
14 346 453 309 2 455 104 340 86 
269 11 127 62 117 51 
179 284 483 268 13 27 416 
92 191 62 397 309 127 182 
383 312 22 209 
470 87 22 134 52 309 319 309 257 304 
455 188 458 11 134 55 264 
62 263 11 127 316 56 156 
455 351 47 340 306 
174 224 462 309 127 310 336 30 424 321 
269 175 340 288 152 265 130 
458 129 179 381 88 
179 432 67 357 
269 346 33 458 287 485 
257 219 64 257 482 
246 88 257 302 
266 434 22 491 203 257 123 
257 370 164 109 131 134 142 68 189 192 346 263 
257 370 38 444 208 47 64 269 
154 131 134 142 160 
257 29 292 151 214 89 172 
269 462 62 158 165 
347 455 4 305 257 294 455 6 309 305 257 294 
458 131 340 408 394 28 
458 129 458 202 160 
458 495 309 408 438 387 153 
271 221 22 445 
63 111 309 396 412 205 
455 86 46 131 340 24 265 
242 284 134 127 257 443 
63 104 340 362 205 309 104 265 
242 462 270 336 257 392 105 336 174 210 
271 289 146 191 318 
257 91 191 209 301 
269 191 316 100 336 257 260 179 2 
458 79 234 233 172 42 
257 10 66 193 
46 22 351 283 
63 244 242 240 310 336 426 311 
334 133 497 134 142 127 180 234 68 189 257 91 
63 113 340 127 62 216 341 
179 151 41 357 336 62 393 
62 370 170 285 250 271 367 146 
269 431 134 331 466 
265 122 127 310 336 233 160 
45 199 11 269 127 
63 362 46 309 104 242 
257 260 11 121 192 
257 91 131 134 408 394 28 268 493 491 
271 341 133 183 310 
132 265 346 257 130 269 462 
269 346 99 240 259 354 
257 15 381 88 
335 458 129 458 497 104 269 234 184 
233 157 497 48 257 258 
455 86 270 130 309 2 269 
265 91 497 134 127 36 57 
455 86 199 179 362 
455 483 269 346 453 309 127 62 50 115 458 129 
63 474 309 319 305 375 
257 12 170 64 265 
269 250 152 54 234 374 301 
133 250 271 367 398 68 189 257 91 
257 263 497 244 485 309 383 105 
455 4 134 188 269 231 129 
458 462 251 309 65 309 345 442 242 115 
257 476 85 495 367 68 189 257 222 
458 131 134 65 309 257 260 
46 113 340 483 268 265 
62 476 169 285 129 458 250 271 299 146 189 237 72 345 
455 351 47 309 314 453 
46 351 113 340 349 199 346 453 189 458 129 
63 293 309 55 269 
179 7 309 257 291 378 309 104 269 
179 22 309 267 32 192 
242 202 127 257 396 336 257 115 
63 47 309 282 189 415 210 
84 46 106 474 269 
174 260 462 337 309 256 291 458 129 
458 175 273 17 62 424 321 397 
257 425 342 175 64 257 91 
264 346 62 42 265 204 269 227 
455 351 131 340 24 184 
20 269 191 469 458 129 
269 191 72 107 118 203 174 210 
57 31 129 269 202 134 65 257 330 
179 22 381 163 56 341 93 
458 346 453 309 127 227 291 
46 113 340 47 270 379 257 29 
132 269 346 152 50 
63 497 47 306 257 294 405 
458 129 458 497 134 177 332 
458 250 309 311 234 269 
458 175 64 143 482 
455 86 179 131 269 38 179 86 179 131 269 
257 341 495 309 68 189 493 222 
46 106 474 309 319 415 269 
257 241 22 437 
455 483 257 325 11 59 475 257 159 336 143 80 458 129 
132 309 184 265 191 107 
92 346 271 130 458 4 55 184 
231 353 309 68 189 257 91 
455 483 63 4 6 269 32 458 129 
179 113 340 320 174 210 
455 497 340 258 173 
92 191 271 91 475 370 133 
458 346 67 198 309 104 493 275 
132 242 462 340 257 384 336 426 281 
347 179 4 311 63 284 19 205 
234 84 231 175 258 
455 282 143 275 203 174 211 
269 209 271 289 28 
257 195 22 427 56 215 
231 129 257 443 250 134 152 36 
242 462 134 76 231 129 
63 84 47 62 341 458 468 205 
242 462 257 130 63 473 309 218 197 
257 160 497 244 418 
455 6 309 244 428 33 245 
63 4 2 415 434 
179 22 209 144 266 105 
269 287 271 28 268 257 427 330 
38 434 284 86 265 
277 10 462 62 223 330 
242 191 174 263 309 104 242 
63 11 127 8 309 305 257 141 
455 191 198 309 282 269 453 
63 19 246 336 205 
269 191 62 67 337 60 
269 462 257 130 336 257 424 
63 432 134 111 309 242 
393 133 497 134 127 180 234 68 
92 462 62 429 458 129 
92 346 62 50 401 336 333 203 257 393 
439 241 22 427 381 
455 362 242 309 127 257 396 336 174 210 458 129 
269 462 257 49 33 174 153 497 127 374 309 173 
215 129 212 336 257 491 22 21 120 
38 455 282 309 349 257 338 
132 354 462 72 181 
38 242 462 62 310 336 269 
455 96 473 309 282 9 265 395 141 
265 191 134 36 
63 47 180 271 247 458 129 
265 346 199 63 473 
257 186 47 152 79 309 348 257 75 
63 11 134 319 197 
38 84 455 497 96 48 242 259 
275 202 273 127 257 97 32 
265 91 497 340 127 36 
179 131 340 362 242 
92 191 271 343 192 
154 66 
458 175 134 152 249 203 398 3 335 
63 358 49 48 265 139 
265 346 270 336 255 346 327 
132 92 22 271 367 222 336 123 
219 292 497 340 142 127 180 234 68 
265 284 59 242 217 
428 177 269 471 340 127 62 165 
132 265 346 453 309 59 242 115 
435 133 47 495 309 177 199 482 458 373 119 
63 151 257 341 
143 214 331 120 
455 104 340 483 455 96 250 62 429 309 2 254 92 
231 431 340 47 309 311 89 269 
215 335 437 38 163 257 330 
63 106 250 50 19 
92 462 340 394 328 458 468 470 87 
365 133 497 134 127 180 234 68 
458 307 309 319 197 
231 250 134 152 116 
458 495 309 417 394 28 336 257 247 
347 46 47 466 179 244 269 
269 462 62 391 24 257 459 162 
269 191 257 297 443 36 242 115 
257 260 11 127 182 171 
87 22 134 198 309 349 173 
455 351 131 340 47 269 405 
179 4 104 139 275 309 258 434 
14 202 293 72 21 
484 38 255 151 134 312 
179 163 62 363 434 
455 113 340 349 199 257 165 462 
63 497 96 48 269 
269 373 127 58 
257 334 191 468 
132 144 265 231 204 
257 348 131 340 456 489 
269 191 62 50 260 
179 84 47 212 317 
92 151 288 62 42 336 275 46 4 104 458 129 
257 159 22 209 144 257 137 382 189 156 
458 497 127 291 257 277 129 
458 462 251 309 65 374 217 
46 497 340 59 269 
92 346 271 354 264 
458 497 134 127 180 234 68 192 
455 86 458 431 134 24 265 
63 473 309 121 265 
179 349 62 391 336 327 415 257 317 38 179 151 340 198 309 258 
269 462 134 357 458 129 
458 306 257 243 405 
233 102 191 340 142 99 
335 455 362 309 282 9 257 136 252 
179 460 47 62 429 309 305 30 
458 129 89 257 315 336 257 409 
257 409 462 382 309 257 398 
179 497 104 265 
455 351 362 309 86 
132 455 104 340 483 265 
132 179 151 134 257 49 327 
269 273 250 62 429 
63 351 47 309 104 426 259 
92 497 127 266 
38 63 432 453 309 166 485 
257 302 131 134 68 189 233 102 
265 346 96 453 309 258 426 260 
231 353 68 
242 403 11 104 265 
428 336 286 250 318 485 
269 346 257 291 118 458 129 
46 373 134 362 309 119 265 
383 120 22 491 360 257 207 
233 317 22 134 
458 131 134 68 189 257 443 
455 483 257 243 462 469 
335 269 191 340 257 291 33 
455 351 497 340 282 453 
257 341 11 417 265 91 189 301 
62 409 462 134 251 487 374 115 
63 103 242 462 340 257 443 
269 346 357 465 
257 159 22 209 144 257 137 346 337 
132 275 104 340 311 265 130 
132 10 131 134 408 485 
455 284 340 47 309 59 231 129 
257 219 497 134 127 180 234 68 442 229 
458 129 466 191 273 72 181 
257 283 303 214 322 179 22 309 127 209 
179 497 47 152 163 458 129 
132 265 346 134 62 452 165 
269 346 152 41 489 458 129 
455 106 474 383 29 16 
92 346 271 21 309 396 
84 459 122 218 
132 242 462 134 174 118 
63 86 199 346 152 129 
92 151 327 231 129 
270 250 235 88 257 338 
63 2 309 305 227 257 33 458 129 
257 465 209 159 144 257 137 382 
143 327 151 496 234 205 
257 35 497 127 67 337 
231 17 203 257 40 447 336 257 370 486 
257 133 129 257 407 202 127 62 220 25 
283 462 189 77 231 129 
458 214 436 89 257 302 
455 202 24 309 483 134 
132 458 497 47 250 332 
458 495 289 28 
63 113 340 319 189 24 242 
458 431 340 483 268 196 
132 458 346 257 392 203 257 424 
63 131 134 362 242 243 
63 432 453 309 349 
335 455 4 319 172 38 314 343 
63 432 453 309 121 309 396 
179 131 134 177 14 250 316 257 60 
132 455 131 340 86 458 191 491 
455 86 458 473 184 309 104 174 392 
455 250 161 174 210 415 233 
269 131 134 408 394 29 28 
265 346 227 179 4 104 
46 202 483 493 202 47 152 226 451 
458 17 203 257 451 447 
257 383 195 47 64 257 482 
45 455 104 340 362 309 282 9 265 
257 299 85 287 271 289 28 
257 370 170 250 271 367 146 
390 497 134 127 180 234 68 156 
46 106 474 309 82 189 
265 346 351 270 336 139 
426 311 462 84 469 231 129 
45 458 388 254 38 250 438 392 260 336 257 281 
63 22 134 198 309 104 269 203 257 407 405 
132 458 191 340 268 309 197 280 
455 351 388 415 205 
92 462 323 309 127 316 336 242 
179 202 282 62 409 451 458 73 
92 22 271 222 336 343 171 
444 208 175 344 309 305 
455 104 340 372 47 62 303 458 129 
265 346 13 165 
63 104 340 362 309 349 265 
458 161 309 65 309 422 189 301 
265 346 199 257 434 362 
480 175 152 357 309 184 458 129 
63 293 258 458 129 
45 455 296 453 309 6 309 2 62 357 447 
139 151 460 486 
458 191 251 309 25 32 374 217 
455 47 134 249 265 257 370 299 129 
269 11 134 142 384 257 243 
265 346 172 231 129 
257 29 185 195 474 300 
455 7 38 474 199 455 473 458 129 
269 462 134 257 97 75 
257 292 151 257 292 
38 455 110 268 269 405 
458 79 309 127 209 
455 296 134 453 309 408 485 
227 242 497 59 
269 346 310 336 210 
458 346 152 24 265 3 458 346 152 264 
455 351 497 340 119 269 324 231 129 
76 133 250 271 68 
458 191 134 128 491 
231 346 460 92 
458 191 427 144 257 207 
341 133 64 92 191 62 452 165 
255 346 470 169 131 134 68 
458 131 340 65 309 257 260 
174 317 151 227 455 47 88 
132 455 131 199 191 291 
46 483 458 11 84 
438 210 175 273 152 257 97 
63 362 451 378 
455 191 134 144 257 466 
179 22 427 190 242 34 
231 191 96 39 
92 191 271 367 68 189 257 263 475 341 133 
347 257 434 362 269 179 4 47 269 231 129 
62 217 381 257 383 267 203 257 395 
455 362 309 305 30 270 
269 431 340 337 280 
62 35 462 251 301 
455 103 455 4 104 269 242 33 
265 462 227 46 4 104 
38 491 458 191 
257 401 191 251 309 127 322 240 176 240 156 
458 250 152 437 203 257 197 
38 84 179 113 340 
335 455 11 311 415 205 
458 175 273 152 116 
269 346 107 309 472 62 168 257 70 129 
242 462 426 172 264 231 129 
84 269 346 404 101 
46 362 309 319 189 415 210 231 129 
242 393 175 62 391 336 396 
455 191 491 38 455 131 340 362 309 218 264 458 129 
302 133 497 134 127 142 180 234 68 
62 391 175 309 104 415 257 400 63 282 197 
406 457 214 155 
63 11 305 257 424 321 
455 104 340 96 24 173 
242 462 62 387 263 
455 471 340 408 46 233 153 
270 4 273 408 485 189 459 458 129 
57 269 353 309 244 367 345 
234 257 459 336 174 492 
455 104 340 483 455 202 106 316 269 309 272 418 458 129 
179 250 309 472 62 101 263 
455 104 340 396 415 257 120 458 129 
271 263 191 180 
257 170 250 271 68 189 257 91 
257 91 175 134 344 152 209 309 257 398 
80 22 125 309 456 266 105 
458 436 324 458 497 25 257 387 32 
434 218 38 179 319 
458 175 257 291 309 160 
455 113 340 188 455 106 306 269 32 
455 110 268 265 41 
269 462 125 309 127 209 381 242 115 
269 346 446 231 204 
458 191 427 156 
257 370 393 204 269 11 160 257 295 
179 47 185 317 
271 270 191 142 116 
269 346 45 446 
62 395 295 462 251 381 242 115 
63 106 152 414 62 391 
269 462 1 346 297 237 238 166 
314 269 203 2 458 129 
63 351 131 340 218 254 189 136 242 260 
341 133 497 134 142 127 180 234 289 68 
455 497 340 420 174 400 
257 219 4 160 257 334 263 
458 473 309 207 184 
458 79 257 334 
269 183 184 254 336 174 260 411 
63 151 39 434 
63 83 426 341 
57 179 193 309 267 32 374 156 
257 341 250 271 367 68 
455 103 434 11 218 254 
271 263 175 152 180 203 265 443 
455 104 340 188 203 265 
455 483 179 106 111 184 231 129 
458 131 340 47 289 146 
144 265 455 104 340 86 
257 263 11 127 322 374 115 
38 46 113 340 47 270 379 257 29 
257 215 47 309 319 
265 346 134 426 259 458 129 
265 346 84 257 443 458 129 
257 285 129 458 250 271 289 146 
242 431 340 472 485 234 269 
455 106 273 182 415 173 
63 151 134 62 215 75 
231 316 271 29 68 
63 351 47 309 401 415 269 
214 63 432 387 
132 458 204 458 4 134 82 
257 12 170 353 309 68 142 
63 122 47 270 56 257 384 336 257 370 486 
242 115 57 462 446 
179 124 309 77 173 234 269 
231 64 257 222 
132 265 346 20 438 447 183 245 
265 305 191 214 469 484 
265 346 134 174 387 
92 191 340 196 
455 351 131 340 362 309 401 415 269 
455 110 269 191 412 257 248 
92 462 271 54 407 
265 462 13 488 458 129 
455 288 362 309 145 265 172 71 
257 370 170 175 64 257 482 
179 151 290 455 11 134 65 
265 33 175 71 379 62 401 
455 103 257 496 277 11 104 242 
46 113 340 188 269 
455 296 134 111 309 269 
458 462 134 251 309 305 
458 191 291 268 265 
227 242 462 45 496 309 286 
347 269 431 134 92 11 127 62 165 
458 183 90 62 34 18 
257 80 151 251 309 121 487 192 
63 106 17 426 103 
231 346 257 49 270 
347 63 104 265 335 63 358 127 203 101 458 73 
269 346 426 33 458 204 
242 462 62 117 260 
455 104 134 188 458 131 269 231 129 
269 346 62 50 378 309 127 
269 346 62 297 172 
434 11 86 14 63 151 
347 46 47 269 46 4 104 269 
231 431 340 362 309 104 265 
242 462 134 257 384 458 129 
265 33 175 84 218 458 129 
63 17 62 391 458 129 
455 296 134 453 309 55 173 
10 273 388 
257 409 175 235 355 62 157 181 
458 129 458 131 340 362 286 189 257 166 231 129 
132 231 497 134 127 62 330 
269 191 273 52 309 267 
458 497 134 127 180 234 28 
84 231 204 231 11 
179 483 265 269 284 127 469 
458 191 134 257 49 270 
215 131 134 68 142 
257 409 191 251 309 456 487 192 
458 129 269 191 67 107 265 179 121 309 104 242 
62 387 113 340 319 
265 346 377 492 
11 179 121 309 127 198 309 104 265 
257 5 250 134 152 116 
455 183 257 126 107 294 336 257 115 
455 104 340 86 199 265 462 
143 434 151 134 24 265 231 129 
479 250 271 367 68 
458 388 309 257 302 
269 497 127 62 430 
63 151 453 309 319 
269 346 62 315 458 129 
257 260 11 127 182 192 
269 346 62 67 357 118 
242 462 310 336 210 405 
242 462 62 165 234 286 
133 92 128 438 450 
269 346 227 357 350 
309 184 269 346 134 62 117 401 
269 346 33 309 82 184 
455 7 309 396 234 265 405 
269 191 62 489 115 
269 462 33 309 244 345 
257 425 364 175 129 269 202 134 267 265 224 
179 151 125 309 267 32 374 34 
458 129 257 387 131 340 47 196 466 
242 191 134 426 263 
63 351 113 340 104 269 
270 219 380 191 163 
227 22 437 56 354 93 
257 419 462 413 234 374 34 
455 483 265 462 357 350 458 129 
335 455 474 427 
172 71 309 305 257 260 
257 140 175 495 
269 191 62 14 346 14 265 96 191 340 
63 151 134 343 412 95 341 
179 57 287 271 28 
455 104 340 483 269 191 62 391 
63 86 63 47 62 357 393 
458 287 271 28 336 257 401 
257 451 260 462 288 257 126 107 458 129 
257 470 169 353 309 68 
63 22 291 92 
257 195 22 309 47 152 209 301 
46 96 24 184 
265 346 134 67 125 
455 104 340 483 24 265 
84 269 346 251 
271 28 22 322 301 
458 202 134 68 289 189 257 91 
458 436 383 105 381 
92 191 271 367 12 21 68 
269 346 50 309 349 173 
63 47 309 19 201 29 
458 250 309 127 226 309 257 302 
458 346 474 265 429 84 
257 44 462 460 308 130 
138 133 497 134 127 180 234 68 
154 175 180 254 309 257 425 342 
63 460 47 62 391 309 104 231 129 
84 133 177 269 497 244 185 418 
133 47 353 309 68 189 257 80 
269 96 191 234 233 
257 212 195 22 163 56 215 
458 183 280 49 270 
37 179 358 472 104 415 257 223 33 
139 434 110 63 22 453 309 104 265 
455 351 131 340 47 269 
38 179 230 282 199 179 293 
132 63 11 273 86 
376 191 257 456 441 
38 455 483 265 346 257 130 269 284 127 
257 341 204 265 42 462 41 167 
370 170 133 250 271 367 68 
458 495 394 68 
242 462 257 49 270 265 431 340 362 309 305 
246 22 251 
265 346 257 126 107 118 231 129 
269 462 134 99 347 394 47 152 116 
455 47 340 316 265 263 
179 131 134 349 173 32 
38 458 175 182 203 117 375 324 
143 375 151 50 309 2 203 
390 353 309 417 257 330 346 153 
38 265 191 438 395 369 
423 191 394 357 
455 483 92 151 288 434 415 173 231 129 
179 358 273 177 257 243 346 469 
493 80 22 251 309 121 192 
179 22 427 
269 346 67 58 
265 462 125 309 384 84 
347 265 191 257 443 231 202 47 226 205 227 
257 470 169 353 309 408 28 
257 222 47 273 152 36 
92 346 41 196 350 
46 273 86 20 269 346 257 456 270 
458 129 458 250 134 
458 131 415 323 165 
455 110 268 205 
269 346 33 234 459 
390 353 309 408 289 28 
62 395 91 462 251 374 156 
63 11 6 309 320 354 93 458 129 
271 452 327 22 356 
63 250 62 67 357 407 458 129 
179 47 423 309 104 415 257 425 342 458 129 
215 129 272 434 436 
257 80 94 229 
132 269 122 127 41 442 
257 410 495 
231 202 134 408 233 451 153 
231 73 265 257 401 497 127 382 56 257 384 336 257 217 
455 103 134 132 179 497 127 
46 351 47 309 86 173 
14 175 257 291 309 127 92 
269 191 340 270 441 
269 346 96 71 56 205 
455 483 63 131 62 50 259 458 129 
383 250 88 257 302 
257 133 131 340 104 265 
354 133 497 134 127 180 234 68 301 
458 204 458 11 71 
458 11 47 423 
179 209 257 461 456 217 
92 191 423 179 497 104 
422 64 265 
179 351 273 287 485 458 129 
458 129 458 131 134 408 31 394 146 
458 80 38 80 
257 395 191 54 381 
451 269 191 438 466 
428 177 269 175 134 218 89 227 
257 119 462 189 166 
257 401 462 251 309 127 322 156 
132 63 106 306 383 375 379 173 84 
84 63 47 49 377 
257 10 66 163 257 313 442 456 115 
309 184 269 346 134 274 
63 47 152 92 62 489 33 
257 481 175 64 257 482 
179 209 269 229 
455 296 62 357 277 458 129 
269 346 134 372 337 
458 346 474 309 311 189 265 
265 346 199 231 473 
92 47 340 152 265 139 
179 151 251 309 127 116 203 334 381 
458 129 257 185 22 163 301 
84 458 462 200 
38 63 11 121 
257 160 490 309 127 220 
455 104 340 483 269 346 265 117 62 401 
242 462 426 49 429 
269 191 62 263 458 250 309 472 
231 316 184 188 455 497 472 269 
269 284 134 47 152 316 
460 458 346 474 428 311 88 
14 175 227 265 466 
63 47 124 426 392 
179 2 50 476 
458 351 250 309 47 270 
242 191 13 297 409 
257 285 495 309 408 394 289 28 
455 104 340 362 309 127 277 458 204 
347 455 497 47 163 205 455 202 
257 164 109 202 134 68 189 257 443 192 
347 269 346 62 117 153 269 346 62 117 153 
92 151 332 107 275 23 242 458 129 
179 2 309 305 269 227 
456 115 265 94 309 59 
242 175 152 413 485 234 62 489 33 
215 131 134 417 29 28 
265 191 96 357 
203 484 434 4 134 70 257 130 179 362 309 70 458 129 
428 151 341 133 
257 383 151 251 309 267 32 301 
458 431 340 33 143 275 
62 263 191 251 324 257 384 336 257 217 
104 340 2 13 260 
493 80 497 244 485 309 62 115 
132 63 460 356 62 130 309 305 
38 265 191 257 443 405 
458 131 134 47 28 336 257 407 
455 425 257 51 
257 299 183 271 345 
269 129 203 62 477 
257 91 191 209 442 156 
458 11 127 254 234 270 115 
265 462 257 165 
62 365 285 495 309 68 189 257 91 
455 483 269 202 258 257 398 
231 273 474 62 429 
179 483 179 47 271 416 
242 131 134 55 92 
455 497 134 55 453 231 129 
455 47 62 429 309 305 
132 63 47 309 104 426 310 
458 161 309 6 32 192 
132 265 11 315 309 59 
269 11 127 62 50 51 
132 63 131 340 86 265 131 63 
132 455 460 47 309 2 
132 455 250 309 104 269 
63 11 351 47 309 121 309 311 189 426 476 
269 191 134 45 39 458 129 
458 431 134 362 62 259 
257 399 79 
271 263 175 152 226 
455 296 134 111 309 265 
335 179 437 233 
231 73 63 104 340 362 62 243 
92 346 423 458 129 
265 346 126 107 
132 179 47 316 271 237 146 398 
458 191 356 56 233 
179 362 309 472 62 477 
458 129 257 465 11 160 
132 179 202 134 68 189 394 80 458 250 
271 385 28 22 209 
63 250 309 2 269 254 
63 86 265 33 462 466 
242 217 462 67 107 309 184 298 129 
63 113 340 75 173 
269 346 460 357 350 
458 131 340 362 309 218 280 
179 86 199 462 453 189 
38 455 113 340 104 265 
271 434 22 491 
179 316 62 477 
269 373 127 227 291 38 269 373 134 
458 431 340 293 227 265 258 
269 346 351 45 446 458 129 
63 11 134 127 154 468 87 
132 63 11 244 257 263 
38 265 346 62 357 118 
257 12 215 250 271 68 
199 462 242 19 
133 497 134 127 180 234 68 
179 432 288 203 174 119 
31 250 271 367 398 68 
458 191 67 39 
269 351 462 340 257 97 
132 257 126 107 118 462 376 346 397 
63 358 6 374 115 
269 346 265 33 32 
455 362 309 2 38 455 113 340 2 
231 346 152 491 
377 120 22 163 
179 202 134 177 69 179 161 309 104 45 
132 227 462 134 17 
132 257 263 175 340 152 316 344 
458 131 134 142 68 309 87 
46 104 340 47 309 127 220 203 72 90 
458 351 473 309 282 197 189 257 334 
179 104 340 47 33 
46 4 351 349 269 
179 151 445 412 13 11 458 129 
92 346 271 29 130 458 129 
257 352 47 316 332 466 
104 46 86 199 269 462 
126 22 209 
335 455 356 143 317 
455 362 309 349 59 
63 227 86 336 257 434 327 203 433 
92 284 340 127 270 
271 133 47 152 116 203 257 443 
63 4 134 75 257 459 458 129 
458 250 271 28 268 257 434 14 436 
63 104 340 349 265 458 129 
246 351 373 311 
269 346 134 387 466 
455 96 188 265 38 455 483 179 188 455 4 258 205 305 
38 199 346 257 164 336 265 75 
455 460 408 173 265 429 
257 476 169 64 257 91 
269 351 202 340 311 
455 288 83 455 497 104 269 458 129 
257 467 470 169 353 309 68 
257 170 175 340 36 257 222 
28 151 251 309 127 209 229 
265 346 257 130 455 362 309 319 
455 131 340 337 257 401 
132 179 497 340 472 30 117 71 38 131 340 472 30 71 
458 202 340 408 28 
132 63 187 485 415 227 242 
242 462 62 357 441 
455 86 179 432 453 309 218 422 129 
46 351 113 340 104 265 
216 215 495 309 68 
242 243 497 127 453 189 234 62 489 33 
455 106 288 129 265 
271 263 250 152 316 234 171 
458 131 134 408 438 153 
92 122 127 428 434 14 104 340 24 265 
269 122 134 127 257 456 
46 104 340 55 210 
46 86 458 230 134 127 
271 28 47 152 322 
265 11 127 485 309 257 334 
458 191 8 309 355 257 451 309 305 269 415 383 446 329 
56 335 257 49 294 191 234 297 378 
269 346 180 257 369 336 271 65 
456 217 455 250 257 429 
257 87 88 
257 15 151 460 92 
257 341 250 271 68 189 265 91 
45 455 113 340 177 265 455 11 305 
257 35 462 301 
215 64 92 250 152 394 48 336 75 
63 250 270 165 144 30 405 
257 170 250 271 68 189 257 207 
38 265 462 62 357 118 
62 295 462 251 374 217 
132 458 129 257 141 250 62 291 309 207 257 425 364 
185 164 109 194 22 491 
269 191 24 458 273 129 269 
45 92 230 127 62 293 234 269 
455 273 356 174 260 
63 104 134 362 309 384 485 24 205 
63 293 61 345 
455 358 47 309 231 129 
140 133 250 271 367 68 
132 458 460 47 309 127 89 438 392 
434 11 351 121 309 127 163 
455 47 309 483 332 
132 372 257 400 151 290 269 373 127 33 
257 299 129 80 189 257 181 47 152 453 189 234 428 33 
92 191 271 370 91 268 269 
63 104 134 362 309 319 309 257 341 
479 250 271 367 68 189 257 91 
46 358 127 310 336 257 387 
458 129 458 250 62 411 
257 411 462 203 378 
455 358 483 268 269 89 257 384 336 257 115 
179 373 134 24 199 179 349 
257 33 175 134 152 322 
455 131 340 372 86 173 
455 404 254 309 270 
269 191 62 357 315 234 184 
57 179 11 134 127 52 309 35 37 71 234 90 
38 347 275 311 254 179 311 254 
455 214 104 340 362 309 282 437 
43 133 497 134 127 142 180 234 68 
455 86 265 265 346 134 58 
265 346 100 92 191 271 101 
257 123 230 384 458 129 
132 179 284 349 269 451 
179 351 129 179 473 309 319 172 234 257 496 115 458 129 
458 358 127 197 20 63 293 173 
63 351 131 340 2 67 357 476 
458 462 371 438 451 463 336 257 115 
132 269 497 127 257 456 
92 11 127 241 
63 11 401 415 173 154 129 
265 346 227 455 473 
231 175 340 474 62 429 458 129 
347 458 4 2 63 358 2 173 
132 428 151 343 197 
38 455 86 63 362 309 2 426 392 260 
1 175 271 448 
38 63 362 205 84 
455 497 134 188 269 
63 287 205 62 357 71 234 13 466 458 129 
179 468 286 134 309 82 
458 131 340 372 86 269 
257 330 346 153 175 134 152 209 56 215 
257 141 175 134 129 69 269 11 160 
455 351 293 309 282 453 
216 133 497 134 127 180 234 68 
269 462 62 294 412 33 458 129 
46 351 497 340 349 269 
257 334 263 7 144 257 137 346 337 301 
242 462 257 451 270 
132 269 131 340 311 
63 124 234 62 297 224 132 63 497 340 282 269 458 129 
269 131 340 282 414 
265 346 257 165 458 129 
231 11 244 90 176 374 34 
289 28 47 134 152 209 
143 275 244 33 458 204 
63 471 340 408 269 300 
458 346 306 242 294 
227 257 311 336 257 456 383 492 462 234 423 
154 191 62 465 74 89 257 33 
334 133 497 134 127 142 180 234 68 
257 12 21 214 131 134 142 68 
265 162 497 244 30 115 
63 460 188 265 462 58 
395 159 22 251 381 242 217 
192 346 407 191 256 445 89 438 172 
242 305 191 67 107 458 129 
257 51 299 495 309 68 189 257 91 
265 462 426 165 
269 346 257 270 415 257 454 
63 27 242 162 458 129 
132 455 362 309 282 236 269 
458 129 458 83 179 250 152 163 
265 191 257 443 229 
63 351 47 62 357 33 
269 346 134 291 231 129 
257 70 131 134 142 65 62 60 371 68 
458 191 297 487 257 295 191 316 
269 462 134 61 
458 214 175 276 439 
199 462 453 189 264 
466 191 273 257 181 
38 269 122 273 127 
269 346 134 24 92 346 152 270 118 
257 357 118 462 265 271 270 191 163 
84 455 296 134 458 129 
132 63 373 134 127 198 309 104 269 56 335 
92 11 127 62 326 225 
257 409 191 404 245 
455 103 455 4 104 257 97 
215 64 179 111 123 
63 47 271 210 264 
72 21 452 191 214 163 
257 396 462 340 469 
45 199 346 257 401 264 
455 483 455 296 453 309 282 269 
84 179 106 474 383 
455 202 177 269 346 453 309 244 286 257 374 185 309 377 492 
132 458 131 340 47 438 392 441 
215 129 383 434 22 427 
231 316 271 367 68 
46 47 309 2 62 496 260 
269 131 134 177 14 191 427 
455 129 242 462 257 429 455 362 
215 131 134 417 394 289 28 
458 191 256 445 203 479 56 370 390 
132 63 214 474 383 332 492 
458 129 62 263 202 127 316 381 
246 375 151 413 234 376 
265 346 257 451 118 455 296 453 309 104 
299 159 22 340 251 487 229 
265 346 257 392 130 92 462 
269 346 351 270 336 493 275 458 129 
265 346 257 130 269 284 127 203 242 78 
229 11 127 446 
458 175 134 152 116 
234 286 265 346 357 
455 362 309 314 8 
269 191 257 392 33 234 184 
455 47 271 289 68 
458 288 182 309 305 
455 11 121 309 311 234 459 458 129 
458 351 80 309 46 
266 241 151 491 
31 214 175 62 370 223 420 401 
242 462 62 33 63 497 104 269 
84 455 362 309 258 
257 247 191 322 62 34 18 
269 191 340 161 231 129 
100 179 104 340 362 459 179 104 340 362 459 
242 462 62 357 259 
458 190 64 257 482 
458 131 134 153 257 465 
63 432 453 309 244 269 
269 191 340 288 117 458 129 
271 452 123 191 128 
63 11 134 55 205 
231 436 381 203 62 302 
269 191 62 357 118 
257 78 462 332 107 291 84 
455 483 455 131 257 291 118 458 129 
179 250 250 271 317 
215 129 62 70 191 491 
269 191 45 337 309 172 231 129 
92 462 423 309 127 129 
57 458 353 309 153 205 
458 462 309 119 62 297 409 189 402 482 
132 455 104 340 483 458 11 104 265 
234 44 269 129 
428 275 273 59 
269 284 127 209 381 242 115 
458 497 127 142 180 234 68 144 192 346 35 
458 191 257 138 203 62 130 
62 263 11 127 316 324 257 384 336 257 115 
231 497 134 127 180 234 68 192 
455 86 265 455 47 
46 358 273 282 257 369 197 475 184 
269 462 67 107 231 129 
257 383 329 47 64 257 482 
265 451 260 11 127 24 62 395 458 129 
215 129 458 250 134 152 427 37 116 
458 131 134 142 65 62 60 371 28 
458 129 458 202 181 62 263 56 257 384 336 374 217 
269 346 50 309 349 
341 133 497 134 142 127 180 234 68 229 
126 434 47 340 
62 215 285 36 257 153 
257 29 312 151 
455 351 311 458 129 
30 330 191 214 163 
458 191 427 89 257 302 379 62 396 
38 179 47 474 62 291 309 104 45 
159 151 309 127 322 301 
269 346 62 446 325 
458 358 127 50 494 234 286 
257 297 447 191 256 182 381 192 
63 47 309 119 257 416 
271 367 345 191 226 
63 151 372 332 425 
227 22 276 189 257 333 2 
458 131 134 68 309 87 
395 159 22 322 192 
63 22 453 309 472 62 496 424 
455 131 340 24 309 349 269 
455 131 38 455 351 124 309 314 269 453 
269 373 47 152 446 
63 230 127 274 189 242 
92 191 271 367 68 475 257 410 
133 353 309 68 189 257 222 
455 131 340 96 188 455 497 305 
257 334 346 295 462 251 53 
455 273 110 268 265 
458 468 184 309 218 203 
257 222 22 134 36 56 257 341 
132 63 22 227 317 
257 170 64 257 482 
257 387 183 233 203 
455 86 62 391 336 434 24 269 
46 288 362 309 319 412 257 392 458 129 
271 120 22 491 
63 362 309 258 458 129 
179 287 134 29 28 
269 11 127 257 400 321 
387 312 497 134 142 127 180 234 28 
92 346 288 374 115 
458 129 458 4 104 323 309 55 205 
257 297 413 191 332 336 257 97 
231 436 190 242 34 
63 47 271 299 146 
257 35 462 251 374 34 
269 11 59 62 391 336 275 
246 47 62 489 130 309 319 
92 191 271 123 38 215 131 340 48 75 
257 207 191 134 128 487 171 
269 191 340 13 263 458 129 
63 471 340 104 269 32 
63 151 412 257 341 
455 4 104 199 455 362 
394 295 191 251 309 319 412 257 425 364 
63 358 6 309 282 257 392 401 
179 151 62 67 357 393 
46 104 340 483 458 358 127 198 309 282 280 
92 191 271 367 68 475 138 133 
265 191 351 257 315 
271 289 146 191 209 
269 346 134 453 309 55 257 334 
189 53 30 377 434 436 
45 265 346 257 50 118 268 269 
458 131 134 47 28 268 13 102 
438 90 353 309 417 394 28 
63 351 131 269 227 
455 483 231 284 71 233 294 
455 362 309 127 270 336 257 392 336 257 392 
189 496 115 346 441 231 436 
257 313 462 203 95 297 115 
265 346 134 288 152 257 443 
455 103 455 4 408 233 62 357 397 
257 283 303 38 164 109 353 68 
62 295 462 251 301 
455 202 340 177 458 306 
458 202 134 68 189 257 44 
269 346 351 62 50 305 
458 495 309 153 257 465 
62 465 285 129 246 195 202 160 
265 4 134 127 291 
458 175 152 445 92 3 301 
63 471 340 127 198 309 187 265 280 231 129 
30 212 434 22 491 
257 51 54 30 407 376 
72 12 21 285 353 309 68 189 257 82 
257 115 462 268 309 384 
63 47 309 282 414 242 
63 106 474 309 244 345 84 231 129 
370 44 91 
104 46 483 434 202 47 83 205 
455 483 269 346 310 336 257 76 162 
132 269 346 134 24 265 
216 434 155 412 205 
265 191 174 224 234 405 38 455 131 269 
455 106 288 129 269 
458 495 309 408 438 153 
179 129 266 434 22 427 
480 346 476 169 250 271 68 189 257 168 
257 341 353 367 68 189 257 443 
92 346 271 378 309 319 
269 175 145 257 425 364 
266 317 22 228 257 491 
439 241 47 152 427 
458 129 89 257 33 
257 166 191 50 
179 251 309 267 173 32 156 
84 63 47 309 408 269 62 429 
139 113 340 104 269 189 13 27 
215 131 134 417 257 153 336 257 427 330 
458 131 134 177 69 394 120 250 152 427 
269 11 273 59 234 184 231 129 
233 400 131 134 267 415 257 326 
233 91 191 209 301 
344 269 462 337 309 438 311 
63 432 134 453 309 59 
63 47 309 311 414 493 327 
179 182 41 357 
271 395 263 11 127 316 234 62 115 
455 104 340 483 269 346 265 337 
31 235 175 237 247 415 257 213 
21 133 129 179 202 6 32 156 
455 104 340 483 265 
383 491 192 
269 346 33 234 345 
132 265 191 351 257 315 
458 175 64 257 482 
257 78 250 271 68 
231 353 394 289 28 
266 292 22 163 
458 129 458 460 250 103 234 459 
38 63 11 47 426 434 92 
132 242 462 199 462 291 
132 242 497 340 319 189 
63 19 257 277 
63 131 340 288 47 265 
347 46 104 340 408 269 309 205 179 460 362 309 86 
92 462 271 378 309 187 205 
63 47 62 259 309 104 
242 462 199 63 293 
132 241 349 62 446 424 
269 191 62 357 305 234 184 
455 483 265 11 258 286 254 
269 346 257 449 325 
455 362 46 309 2 234 30 115 
272 317 22 228 257 491 
31 64 265 
314 245 174 338 
242 115 455 106 182 62 391 
242 393 175 139 50 400 
257 383 195 129 179 131 134 86 201 29 
132 265 346 351 257 315 
265 346 134 199 179 131 
269 191 38 462 174 61 172 
63 124 38 124 
455 473 309 305 231 129 
46 47 309 483 414 
139 241 47 152 290 269 
241 108 20 179 116 
63 47 439 317 
179 131 340 472 269 
63 11 104 257 97 
455 4 134 60 269 234 173 
455 86 458 11 104 269 32 
458 191 124 203 62 352 170 334 
46 273 86 231 129 
269 191 340 62 357 71 
269 346 134 67 357 
458 191 62 136 299 203 257 476 169 
12 133 495 309 68 
257 170 64 257 207 
458 278 309 160 
269 346 227 257 97 387 
126 22 273 249 32 
465 133 214 353 309 68 
63 47 62 357 429 
63 47 383 317 
458 131 134 68 189 257 40 102 
270 330 436 144 256 437 203 257 119 
265 346 257 451 33 455 4 177 265 
455 483 231 175 62 117 416 
92 22 271 222 336 394 123 
458 131 62 50 259 
426 392 476 462 426 159 458 129 
14 202 362 237 62 259 
38 92 346 323 429 179 11 
257 341 175 64 257 482 
84 269 462 134 257 443 
269 346 227 455 473 309 355 
269 191 322 156 
215 287 271 289 146 
347 458 131 340 349 269 458 284 340 60 269 
269 191 13 395 60 
46 316 269 67 274 
434 22 290 269 497 127 438 115 
132 29 23 265 269 191 62 50 441 
63 4 104 269 265 130 
257 59 191 251 
257 465 4 160 
242 270 462 446 
242 462 233 263 
242 191 30 451 
216 221 202 127 445 374 115 
455 473 309 104 357 275 231 129 456 115 
269 346 257 451 336 139 
179 362 309 218 197 
257 465 346 461 155 189 257 350 
104 340 46 483 265 269 202 47 218 485 
458 191 291 92 
455 474 309 86 174 387 
484 462 257 456 429 
63 47 152 198 309 177 199 63 473 458 129 
269 131 134 142 68 189 257 401 
269 346 351 310 336 269 
215 129 289 482 22 58 
242 462 426 277 346 172 
257 167 334 495 379 68 
46 47 309 104 265 
458 129 458 131 134 86 289 28 
458 471 340 127 453 172 
269 191 340 274 69 257 299 250 152 163 
63 131 265 38 84 63 47 309 305 
242 462 134 257 49 302 309 349 242 458 129 
458 497 134 408 394 289 28 
458 473 309 472 62 477 
46 351 319 415 265 
271 159 22 322 
257 298 462 84 257 136 181 
13 42 462 134 99 
455 362 309 396 257 341 
455 273 110 455 202 104 269 32 458 129 
455 351 6 309 282 254 336 257 130 
46 4 134 244 62 429 
63 47 62 165 264 458 129 
458 131 134 153 205 
63 306 257 321 456 115 132 455 131 340 2 
231 351 202 340 
92 191 271 68 475 257 341 
63 106 474 309 127 198 309 305 143 375 
455 483 269 346 357 
269 346 62 50 166 
132 269 431 340 456 
231 129 231 278 62 289 160 
143 275 244 33 
455 104 340 483 179 358 315 84 
45 63 151 8 309 104 242 
455 104 134 188 269 231 129 
63 497 340 188 269 231 129 
132 455 202 340 104 265 
257 410 497 134 142 127 180 234 68 
458 202 47 355 257 40 380 475 257 425 364 
455 483 63 151 92 458 129 
269 373 127 185 492 
269 346 50 309 127 198 309 127 72 76 231 129 
455 47 340 71 203 62 430 
92 175 309 127 72 247 
458 161 309 160 
455 296 264 309 104 62 259 458 73 
150 462 251 309 35 189 257 403 324 257 384 336 257 115 
132 265 346 134 62 165 
458 284 273 2 32 
455 358 460 104 269 231 129 
257 283 303 250 271 367 68 189 257 407 
46 153 269 458 129 
269 346 152 383 105 
455 351 131 340 483 268 269 
335 455 202 483 336 62 496 393 
455 27 269 291 84 458 129 
139 129 179 473 459 
455 358 127 198 309 2 203 257 374 447 
63 106 474 309 319 197 38 282 257 456 260 
458 353 309 326 482 
179 4 349 9 257 416 
257 91 131 340 408 28 
63 11 121 309 396 458 129 
231 209 271 289 68 
291 84 351 462 340 257 33 
265 183 233 254 336 257 294 
257 327 264 151 446 
92 191 428 357 449 350 309 486 257 25 
479 462 270 336 205 
62 263 284 127 316 374 115 
269 191 62 96 357 118 309 104 
46 47 309 314 220 189 143 275 
231 191 198 309 282 300 38 60 215 
257 21 353 309 68 
257 80 121 376 
455 182 270 437 89 62 33 
38 455 483 269 346 107 309 166 265 
257 186 341 250 271 367 68 
257 345 175 257 19 336 257 216 368 
133 129 179 471 340 86 14 306 234 105 
132 269 11 244 428 33 
271 401 191 382 
84 63 47 426 451 463 
455 483 455 4 104 227 336 269 
179 129 242 33 11 127 446 
132 265 346 49 310 336 269 
63 47 340 250 265 429 234 62 489 33 
458 191 134 116 
133 131 134 142 68 
370 133 47 64 257 482 
455 4 282 111 309 265 
231 175 212 317 
242 462 257 456 336 199 455 47 231 129 
132 455 131 340 86 455 191 453 309 267 270 
38 458 431 62 357 259 
174 33 11 218 458 129 
370 133 250 271 367 68 189 257 477 
231 431 340 305 394 223 448 
269 346 62 452 452 401 
179 495 309 408 28 
92 346 134 62 429 265 92 346 453 309 127 62 401 458 129 
455 86 199 346 453 189 
45 187 269 189 409 
132 32 63 230 104 332 
458 131 134 68 189 257 401 
465 194 27 257 29 252 440 
458 79 203 62 477 
455 296 134 453 309 472 269 234 46 
11 269 127 62 424 168 
62 395 263 191 251 374 34 
139 388 309 257 425 364 
132 269 346 152 337 
269 191 134 257 443 
63 104 340 96 86 394 446 
455 47 340 152 92 203 62 430 
179 47 423 309 104 415 269 458 129 
132 458 346 134 174 49 165 
92 191 423 455 497 104 
455 47 340 249 394 258 
46 4 59 275 
347 455 250 340 474 242 270 455 202 340 47 316 269 
455 104 340 483 63 358 47 265 325 89 227 
242 462 62 223 338 
38 179 362 459 
46 11 282 414 242 
458 129 120 163 185 336 257 410 
458 129 257 44 202 121 
132 231 495 309 68 
257 169 131 134 408 28 
347 455 293 332 455 11 244 332 
455 104 340 483 269 346 291 458 129 
215 250 271 367 68 
257 21 64 257 91 
455 362 434 309 86 265 
269 346 134 62 117 401 
455 358 273 47 233 197 
132 231 307 275 309 59 
265 346 134 257 224 336 257 248 
269 346 41 442 234 265 458 129 
257 170 214 495 68 189 265 91 
458 131 340 408 28 
231 468 173 265 231 131 134 47 269 
38 242 462 96 446 
458 131 134 153 394 141 
179 22 310 336 257 248 
455 6 134 309 70 
455 11 35 234 173 32 
231 462 62 310 336 174 210 458 129 
458 129 257 325 462 308 320 
63 86 92 462 62 165 
458 129 332 28 202 127 209 381 
132 458 73 242 191 134 62 102 234 257 44 
63 104 340 47 394 146 234 46 89 242 33 
257 80 22 445 56 167 133 
179 214 250 180 62 263 
458 131 134 267 415 394 341 312 
269 122 273 319 309 409 
269 462 54 309 456 62 217 
46 267 62 391 336 434 
257 90 11 486 374 34 
425 353 68 
92 462 271 293 234 270 
242 11 134 311 458 129 
132 92 462 134 395 247 189 227 257 28 
269 11 134 59 
455 113 340 188 242 
246 195 250 152 445 3 53 
455 351 183 62 429 38 474 269 
458 346 237 62 117 310 336 257 260 
269 346 234 195 38 16 
428 336 286 151 460 92 
62 263 497 218 156 
179 436 383 105 381 
455 483 455 293 309 104 269 
257 395 11 127 445 56 257 384 336 242 115 
242 11 244 428 33 
458 131 134 168 62 369 
269 351 113 340 121 
439 434 22 128 491 
63 474 357 159 
179 47 309 188 
269 431 340 472 466 
132 179 250 134 152 198 309 311 254 257 28 
271 29 28 22 316 398 
132 458 175 134 316 257 291 263 
455 110 63 250 62 429 309 319 227 257 130 
92 191 271 367 68 475 215 37 257 341 
132 275 131 340 311 254 475 257 315 
257 395 447 462 413 234 171 
332 80 22 54 192 
257 409 191 54 309 121 192 
257 341 462 251 309 472 95 263 176 374 115 
215 133 497 134 127 180 234 68 156 
455 362 309 258 174 387 291 84 231 129 
269 346 288 257 130 
242 462 62 67 357 315 458 129 
458 129 270 330 191 491 132 287 271 28 
271 370 120 22 491 
215 131 134 55 205 
257 368 462 251 309 267 301 
132 269 462 199 269 462 
242 497 127 351 257 315 
231 191 251 309 127 209 156 
257 299 129 458 250 271 29 28 
63 104 340 96 86 
63 131 340 24 269 227 458 129 
458 191 273 116 
63 293 459 231 468 62 350 225 
242 462 134 257 443 257 399 129 
63 47 309 472 257 416 
455 349 269 240 174 259 458 129 
46 273 282 111 309 265 
92 22 271 29 28 336 438 325 
257 221 151 54 234 171 
455 86 63 4 2 415 205 
136 457 47 134 152 322 
458 471 340 127 257 456 
257 350 287 233 103 
269 358 127 30 217 324 455 349 205 
269 346 62 50 441 458 129 
257 409 11 127 257 297 234 246 
269 191 62 165 57 
63 47 340 250 139 375 24 242 
132 92 122 127 270 
132 63 106 152 67 337 
455 468 173 455 358 127 92 231 129 
455 284 127 111 309 269 
63 473 309 305 214 
257 33 214 191 62 158 168 
455 113 340 408 62 338 153 
133 495 309 68 
46 113 340 70 173 189 438 451 315 
269 129 458 497 134 127 124 32 
132 455 187 203 257 311 
63 11 47 62 357 294 
458 214 495 309 153 257 365 
179 47 423 309 104 415 243 
63 110 269 373 
179 104 134 362 46 
132 458 129 92 191 271 263 189 242 369 
242 230 384 269 73 
265 346 257 130 458 307 269 
202 63 127 198 309 305 
215 133 497 134 127 180 142 234 68 189 257 91 
458 122 235 47 
455 296 8 309 314 205 254 
257 285 353 289 28 
455 96 497 458 468 257 359 326 
458 191 209 383 492 381 
62 395 295 462 251 381 242 34 
38 265 346 227 455 47 309 177 189 269 
455 104 340 188 203 173 240 62 494 
231 131 340 408 485 487 257 384 
458 353 309 408 28 268 257 433 
231 462 475 496 114 140 
46 104 340 349 62 391 245 257 207 412 242 393 
455 24 309 2 189 242 334 231 129 
455 250 62 391 336 33 
458 202 134 153 257 465 
179 129 266 434 22 491 
132 242 462 174 291 309 396 234 174 210 
269 462 309 486 374 115 
257 370 170 250 271 367 68 189 301 
265 91 191 214 64 56 31 
242 462 270 46 362 309 305 234 257 393 
179 356 271 454 
132 3 335 179 47 134 17 
92 151 45 139 275 63 293 
257 341 278 309 160 257 263 
370 133 47 64 265 
475 92 257 260 191 189 
257 368 497 134 127 180 234 68 
269 191 351 62 260 265 250 309 127 306 
104 455 47 62 429 
257 341 204 265 462 134 257 443 
458 161 309 65 309 257 279 309 35 374 217 
257 357 118 462 63 86 63 4 2 415 257 392 336 205 
455 296 134 453 309 68 189 265 458 129 
455 47 340 110 268 269 
46 104 340 86 199 346 58 487 46 6 269 
45 455 103 179 11 104 269 
455 483 269 346 257 291 263 
269 250 309 305 203 257 384 
84 242 462 174 429 309 96 472 269 117 
455 110 458 182 62 50 260 
257 393 462 67 357 
257 330 191 226 300 56 215 
269 191 288 45 486 
455 86 455 4 2 476 
132 269 346 460 310 336 257 76 130 336 210 
458 214 129 458 202 160 257 295 
132 458 462 203 90 
265 462 340 288 62 357 118 
479 204 439 120 22 163 
269 462 49 309 258 257 51 458 129 
179 151 257 126 107 434 203 174 210 
257 341 437 197 
271 159 22 251 53 
334 133 497 134 127 180 442 156 234 68 
271 270 191 491 203 143 253 
458 307 309 127 257 392 458 4 127 
63 293 309 349 269 311 
265 346 227 179 362 155 129 
269 346 134 96 107 
62 341 299 64 265 92 22 394 237 278 
269 175 340 152 265 130 
133 287 271 289 28 
265 346 257 130 179 2 
438 102 462 134 99 
390 177 257 44 462 134 469 
257 393 129 458 191 491 229 
92 346 134 265 196 59 
257 221 151 251 309 127 337 
269 346 24 174 158 172 
63 151 264 309 258 205 
63 151 134 200 
227 185 250 152 437 309 450 
455 474 309 265 369 
132 257 126 107 260 462 203 383 105 
455 483 458 175 332 19 189 257 112 
63 293 357 434 24 46 
269 346 13 291 309 104 45 
458 191 340 427 
455 362 62 429 309 104 29 275 
69 63 4 104 265 455 483 63 4 
46 113 340 96 369 89 394 270 118 
476 133 495 309 408 394 29 28 
465 133 445 254 323 103 
257 341 202 134 68 189 229 346 295 
203 265 443 231 129 231 202 326 234 176 221 
458 110 458 191 254 
210 191 357 309 184 
159 22 251 156 
265 346 199 179 104 
265 346 174 224 38 455 296 453 309 104 269 
291 84 179 151 340 
265 11 127 72 107 310 336 174 217 
62 263 250 309 127 316 
269 191 257 270 118 179 474 223 
46 284 311 189 265 
455 250 309 75 173 309 71 438 294 
374 115 122 127 446 
458 73 63 432 453 309 187 254 62 168 
159 151 309 127 322 56 376 
257 162 202 121 
30 330 191 256 261 300 56 215 
132 257 400 47 152 50 
457 151 453 485 227 257 33 
455 86 257 457 151 453 485 458 129 
455 483 269 346 453 309 127 257 29 434 
242 11 127 270 336 205 
63 432 337 309 257 384 336 257 162 
458 11 104 62 50 259 
299 159 151 251 309 127 316 398 203 62 217 
63 151 186 458 129 
458 129 332 28 202 127 209 176 171 
63 432 220 415 241 
264 462 438 91 
46 151 426 49 103 
458 287 271 29 28 
269 462 257 451 33 394 178 175 124 237 62 313 
458 191 340 24 265 
132 269 490 125 
257 162 175 134 152 111 203 257 425 364 
458 353 309 68 289 189 257 407 
455 483 269 346 107 265 179 104 340 86 
269 250 152 62 489 33 
269 191 351 62 50 2 458 129 
132 242 11 49 127 234 257 34 336 122 
269 346 423 496 309 286 
269 191 257 451 158 369 336 257 441 132 269 202 340 127 257 456 
257 477 287 271 28 
257 466 462 340 92 458 129 
179 22 251 301 
455 4 134 320 205 
455 306 257 294 458 129 
269 346 469 487 374 33 
62 476 169 285 214 353 309 68 
269 191 310 336 174 259 
269 460 175 265 333 
455 358 2 231 129 
455 131 340 483 268 269 
269 346 67 107 496 146 231 129 
269 346 257 130 455 106 288 182 
458 381 88 265 393 
133 287 271 28 
257 241 108 245 
132 455 103 455 104 340 47 309 
332 434 47 146 189 269 
269 346 134 257 130 63 473 275 309 319 
455 468 173 309 408 269 62 437 
246 336 286 182 62 357 476 
257 383 195 151 251 309 267 156 
258 286 447 485 143 434 154 129 
330 425 175 340 250 257 392 315 309 257 281 
132 92 151 327 38 269 460 175 134 152 316 
179 104 340 59 423 
179 17 234 351 257 297 33 203 212 375 
458 202 24 205 309 384 257 97 130 
332 258 191 189 257 130 
179 497 340 188 265 
132 11 269 127 198 309 104 265 
265 346 257 277 346 224 
271 153 175 152 322 
159 151 251 374 217 
455 296 453 309 104 174 392 
179 358 47 309 282 111 309 269 
132 269 11 244 62 430 
460 464 202 420 199 179 47 
242 113 340 127 52 458 129 
215 131 134 408 233 153 
269 129 269 202 125 121 374 34 
269 191 361 190 242 34 
62 40 330 191 427 
403 431 134 483 242 202 127 72 181 
269 96 474 309 205 
455 362 309 258 46 
84 179 250 309 60 269 245 
63 351 293 257 185 448 
257 247 191 322 53 132 271 28 22 318 
438 400 83 173 
423 4 314 173 475 269 
231 131 134 86 14 250 152 437 
242 33 497 127 446 
132 269 462 134 469 
132 134 227 47 88 
455 11 288 349 269 
265 202 298 205 254 336 257 370 137 
63 362 309 104 242 
234 428 269 462 41 442 
265 131 340 244 489 
257 433 214 353 309 417 394 28 
84 458 307 309 6 32 
63 432 62 393 38 63 104 275 240 62 393 
132 56 335 269 191 235 469 234 438 393 
13 130 462 309 319 189 343 
242 191 257 126 107 397 234 286 
132 242 462 62 357 315 
257 370 476 109 250 271 367 68 
242 462 72 107 488 
92 346 257 467 181 
132 451 7 301 346 260 
271 237 25 175 152 322 
458 175 340 152 52 309 65 
132 458 495 309 408 438 153 
458 346 270 336 257 392 400 203 257 424 
62 263 191 251 374 34 
458 131 340 47 309 127 92 
257 91 287 271 29 28 
458 175 62 409 54 374 34 
265 263 175 134 344 152 316 458 129 
38 92 151 29 327 
38 231 346 474 257 333 
269 346 33 234 62 274 254 
269 191 96 62 19 488 
476 183 469 475 92 
179 473 269 309 127 356 
147 462 62 357 118 
265 346 50 458 129 
265 346 134 257 130 46 104 101 
383 241 22 116 192 
455 47 309 104 269 32 231 204 
132 291 84 269 346 351 62 260 
383 29 216 195 124 309 258 
38 265 346 199 179 474 
269 462 41 107 
455 86 199 455 483 
257 91 131 134 408 29 28 
390 497 134 127 180 234 68 
257 396 462 134 469 
179 22 96 357 
257 21 131 134 65 77 
419 133 129 271 289 159 202 127 322 487 301 
269 346 134 453 309 127 374 115 
63 131 62 357 259 336 269 
257 477 131 134 408 289 28 132 129 257 443 191 308 44 
38 455 483 269 346 58 203 257 416 
257 341 250 271 68 189 493 222 
38 265 346 257 384 336 286 
257 40 447 191 182 171 
269 346 62 357 315 234 184 
28 22 316 99 229 
63 151 340 62 310 336 255 
46 106 474 309 311 38 46 106 474 309 311 38 46 106 474 309 311 
257 393 11 127 322 381 
201 164 462 446 
458 57 131 134 408 28 
92 191 428 345 
257 325 4 134 121 
269 11 258 184 89 257 384 336 257 281 
46 113 340 320 275 24 265 
269 462 62 67 117 90 
257 80 151 309 121 301 
455 96 47 423 309 177 
269 346 58 458 129 
458 462 453 309 282 62 297 429 
63 235 86 14 346 453 309 305 
84 63 47 62 310 336 173 231 129 
379 13 19 455 104 340 349 394 429 
271 270 4 244 265 300 475 286 
455 351 362 46 309 86 265 
92 191 271 367 68 56 257 21 
455 296 8 309 305 72 419 
38 455 483 46 4 104 357 101 
46 432 203 62 397 
38 92 346 460 62 489 130 309 319 
458 131 134 104 394 311 
458 307 309 258 434 
265 346 227 455 296 343 
179 250 271 28 189 257 383 163 
455 296 453 309 104 265 
37 129 231 250 271 29 28 
242 462 62 117 101 84 
455 351 47 309 104 242 
480 200 415 272 
455 362 309 2 257 186 486 
455 351 473 309 305 231 129 
150 462 251 309 35 189 257 181 374 217 
63 351 131 340 104 269 
63 106 474 309 282 257 15 254 458 468 157 194 
257 328 404 234 496 221 
92 22 340 394 327 
38 458 131 340 55 92 
215 64 257 222 
215 316 271 367 68 
134 308 242 74 
458 175 152 62 117 258 309 184 
159 151 251 309 127 322 
269 346 273 218 485 
257 162 462 251 309 244 266 492 
63 473 309 319 254 39 
458 191 209 144 185 418 
455 11 305 257 396 
455 104 340 188 458 131 242 
242 462 257 210 455 362 234 174 317 
309 184 265 346 134 257 181 
46 47 309 2 476 347 46 362 309 2 458 129 
455 110 269 191 62 357 224 
458 129 212 120 22 491 
179 22 427 469 257 236 217 
455 351 362 309 86 199 346 453 189 
316 129 257 341 202 121 95 313 98 257 334 346 295 
132 458 131 340 282 269 
12 328 292 193 
132 179 497 273 244 257 348 32 
46 113 340 458 129 
92 191 271 367 43 68 
265 346 446 458 204 
270 330 191 491 203 257 207 
455 362 309 127 274 189 270 118 458 129 
455 131 340 362 309 408 485 
458 191 413 223 456 53 
231 495 309 408 394 289 28 
132 269 346 13 263 
265 175 152 426 260 
46 104 340 311 234 257 277 
257 292 151 251 309 181 62 425 477 268 31 
455 362 309 71 242 338 379 123 
38 269 346 288 152 24 265 
265 191 273 62 165 
185 434 22 427 
269 346 33 234 62 59 
132 257 476 169 64 265 91 
231 353 309 153 205 
257 40 131 340 311 254 
215 133 202 134 68 
458 191 134 427 231 129 
20 46 282 62 429 46 351 47 309 472 257 126 336 269 
179 351 362 205 309 55 
458 353 309 408 62 42 
234 184 265 175 273 152 72 181 
63 4 411 234 257 416 
438 387 79 257 302 134 309 417 289 28 
72 12 285 129 269 202 
455 362 309 258 257 393 254 
92 346 423 455 4 104 458 129 
257 298 191 340 322 
132 101 462 67 357 
132 231 113 340 244 33 245 360 257 217 
215 83 458 250 439 454 
63 293 46 203 242 303 
132 92 22 496 222 336 123 
84 458 346 268 309 6 32 
455 113 340 408 46 438 153 100 455 47 317 38 62 387 458 468 257 334 
179 131 340 244 454 
458 131 134 142 65 62 60 371 68 
215 129 266 434 22 163 
269 175 423 309 104 415 257 341 336 31 
257 425 342 250 271 367 68 
179 106 17 185 336 13 236 439 375 
265 122 273 127 99 
257 25 191 161 458 129 
257 263 250 152 251 
231 191 437 203 257 211 
335 92 462 257 239 
92 191 271 29 130 
269 191 62 39 270 
63 113 340 25 205 227 
132 458 191 340 116 234 265 
257 465 278 309 417 95 159 374 156 
63 358 311 269 254 458 129 
132 179 122 84 127 41 442 
458 495 309 153 205 
458 175 340 17 3 122 252 
455 202 24 309 305 264 458 129 
257 169 495 309 408 254 394 28 
84 269 462 41 442 309 319 197 
455 473 309 305 257 294 
92 191 271 456 115 
269 191 33 458 129 
242 462 257 11 336 257 434 
257 370 486 462 257 370 486 
458 495 309 188 242 
458 129 458 110 458 202 127 163 
63 11 84 282 189 415 269 
179 362 309 104 269 32 
460 92 462 428 103 
257 392 462 20 455 305 
455 24 205 458 129 
269 175 309 127 92 
132 63 113 340 408 485 
458 346 257 270 14 175 327 
455 104 340 24 265 
257 91 497 134 127 36 56 370 133 
458 191 381 226 309 302 
63 351 362 205 254 336 264 
269 497 47 152 446 
269 191 107 309 314 173 
179 351 104 340 362 309 401 415 269 231 129 
179 47 309 258 493 434 
63 151 24 62 387 
179 96 22 174 424 
458 373 282 62 429 176 
455 483 265 231 462 257 392 
92 151 383 275 46 4 104 458 129 
132 46 4 104 41 357 62 259 
257 409 462 251 309 456 439 418 
458 346 134 257 49 270 
458 182 62 96 357 260 
265 346 227 455 47 309 177 84 
438 419 191 251 
231 7 254 336 271 378 
269 497 134 127 142 36 
271 29 178 462 372 337 
63 151 257 366 21 458 129 
257 195 468 233 179 22 354 133 
257 409 462 54 309 121 414 192 
63 351 108 9 269 
484 175 306 95 377 375 
458 191 371 438 297 463 203 480 
257 341 11 319 
458 373 127 257 49 270 
24 126 133 458 495 309 408 438 153 
84 455 86 458 129 
265 346 67 107 309 286 
92 462 62 429 234 459 
455 362 309 305 264 
63 151 134 453 309 121 309 104 265 
257 328 462 446 84 
257 425 364 175 134 
199 346 257 117 401 
269 346 453 309 127 62 357 397 
92 151 266 329 458 129 
38 265 346 257 392 118 63 4 104 
265 346 257 130 269 346 152 227 281 
257 303 191 134 413 189 77 
132 255 122 134 104 265 
269 346 288 152 62 310 336 174 210 
132 179 11 282 269 
458 191 209 301 
72 160 462 251 
257 159 22 134 367 
455 47 185 317 
269 346 199 455 293 84 
63 131 38 455 474 257 466 
455 131 340 188 455 497 305 242 294 231 129 
62 305 337 309 174 172 
257 304 175 62 489 130 309 319 
103 63 104 269 264 
133 131 134 417 438 153 
269 284 127 24 265 
257 141 287 271 28 
257 107 118 462 265 257 263 11 127 226 242 217 
45 242 373 127 438 395 115 
212 29 120 22 491 
46 106 474 309 401 415 269 
455 11 134 35 458 129 
271 327 22 128 
269 346 453 309 127 62 489 441 
257 482 22 322 156 
350 222 129 458 88 62 217 18 
335 92 151 257 241 
132 179 131 340 311 254 
179 113 340 258 269 
455 362 309 121 309 2 
455 104 340 483 268 466 
269 11 244 332 33 
438 153 191 340 209 
38 265 462 214 310 336 257 165 
179 250 271 332 28 242 217 
269 11 127 62 117 441 458 129 
62 395 295 462 251 176 374 115 
246 353 309 408 28 
458 191 427 142 
455 483 458 11 305 
455 131 340 86 199 269 191 
455 296 453 309 319 309 269 38 455 358 282 92 
132 455 47 309 314 220 234 257 370 486 
269 462 134 125 458 129 
423 462 274 231 129 
460 269 191 62 337 60 
234 173 242 462 172 
92 346 271 165 240 489 240 455 314 220 
455 351 362 309 305 
458 284 134 282 269 
63 47 180 67 357 159 458 129 
370 120 214 163 
269 346 96 203 13 334 458 129 
179 131 134 408 28 268 438 102 
265 122 134 127 125 
455 362 205 309 127 274 
62 370 170 285 250 271 367 28 
179 432 189 136 336 13 260 291 84 
455 131 340 24 265 89 227 
38 63 131 340 305 
242 462 134 257 126 107 181 458 129 
484 11 134 104 265 
458 129 63 358 59 173 
257 168 471 340 314 184 264 
269 346 62 452 165 
174 260 462 67 337 458 129 
46 104 340 372 6 
92 175 152 271 343 3 
269 346 426 101 
242 122 47 152 453 189 428 33 458 129 
242 284 340 127 62 61 181 
242 462 268 332 23 466 
257 330 250 344 309 127 116 
62 263 462 251 374 115 
455 79 233 347 231 473 258 
455 86 92 346 62 293 234 242 
271 263 191 316 192 
455 104 340 47 394 336 265 
270 436 38 439 22 491 
265 346 199 346 107 
38 455 483 265 346 62 357 118 
257 325 462 84 308 320 
231 495 309 408 394 28 
271 263 175 152 316 458 129 
257 85 4 160 
458 497 340 153 270 118 
257 91 191 36 56 257 470 169 
271 289 160 462 58 
72 44 191 161 
455 113 340 71 189 269 
458 131 134 47 28 
257 44 462 453 189 458 129 
422 175 306 439 336 377 375 
231 436 439 105 381 
174 259 462 134 309 282 145 415 257 117 437 
458 287 271 449 28 
455 483 63 104 426 26 
269 191 340 351 257 326 
242 462 340 270 336 205 
455 316 269 309 30 441 
291 84 269 346 107 100 455 296 198 309 2 30 397 458 129 
12 21 133 131 134 142 68 
269 175 288 152 242 130 38 11 273 59 
493 222 497 340 127 142 36 
257 491 22 226 309 62 302 
46 47 309 314 453 
426 311 462 134 469 458 129 
63 432 270 336 257 392 
458 131 134 408 257 42 336 493 163 
38 269 191 134 257 291 118 309 104 
458 175 309 127 39 
347 179 483 24 265 179 471 340 456 489 
63 284 311 309 384 257 123 
92 346 271 320 458 129 
458 175 495 309 104 45 
63 41 19 242 160 
63 104 134 47 394 146 
257 120 22 427 189 257 97 441 240 257 207 
455 106 474 309 282 453 
458 131 340 362 309 244 257 429 
179 41 47 88 
89 257 97 33 92 151 496 327 
458 191 386 240 290 
458 129 458 251 257 141 309 267 32 
458 346 251 309 2 376 89 422 
275 11 59 
63 358 401 415 269 
460 257 465 462 134 379 327 
242 462 257 297 37 40 447 
257 325 202 47 152 257 97 
269 175 152 382 3 122 
458 175 272 317 
63 362 309 305 439 
38 458 17 257 419 
49 112 312 47 257 291 309 71 234 277 
12 133 129 
66 133 129 179 250 271 289 146 
347 63 104 340 47 269 63 471 340 47 459 
133 131 134 68 189 257 80 
458 358 311 493 275 254 
63 131 340 188 269 132 46 131 269 
455 110 242 191 174 456 115 
347 257 434 104 134 35 234 184 455 11 197 254 
458 273 490 309 282 280 
265 346 41 167 231 129 
269 131 340 315 254 242 130 
63 351 474 309 6 309 104 269 32 374 115 
269 191 62 117 305 234 286 
185 434 151 163 
455 296 453 309 305 242 
455 296 453 309 119 269 211 189 
270 436 360 257 409 
455 131 340 483 458 202 6 32 
242 462 199 63 104 
334 133 353 309 68 189 257 295 
46 104 340 47 309 77 62 437 
231 202 340 408 332 28 
455 131 340 47 394 327 144 265 
455 131 340 362 309 2 271 212 375 
231 131 340 282 254 336 265 270 
347 269 462 134 63 47 309 396 269 
455 358 282 173 92 
455 483 458 4 258 426 393 
257 91 497 134 127 36 
455 4 349 265 84 
63 293 201 29 
451 159 22 251 442 171 
265 191 456 217 
227 230 127 124 254 
179 104 340 104 269 234 257 466 
92 346 62 391 453 189 264 
257 70 462 134 251 309 472 62 263 234 428 33 
455 104 340 483 269 11 127 469 458 129 
242 462 174 451 270 
38 458 373 127 357 32 
132 179 106 474 309 311 265 254 
63 471 340 127 182 203 242 61 260 
455 362 351 257 463 231 129 
179 131 340 188 184 
257 297 462 189 301 
269 41 287 271 28 
456 115 179 250 212 
132 231 73 242 462 174 172 
269 11 218 32 
257 154 66 191 134 425 57 
269 346 107 265 63 258 458 129 
63 86 242 462 257 456 429 
92 151 383 332 375 309 319 
455 129 455 104 340 362 309 86 
269 346 62 407 378 458 204 
257 387 353 309 68 189 257 326 222 
455 104 340 86 199 269 462 
257 16 22 209 379 256 116 
215 129 458 490 309 127 203 357 102 
265 191 240 337 240 231 474 
347 63 4 282 332 311 63 4 282 332 434 
138 133 131 134 417 394 146 
92 462 271 59 203 265 
265 346 257 357 350 458 129 
179 41 131 340 177 196 
257 101 382 234 62 115 
38 269 346 357 309 127 197 
132 257 133 151 340 295 269 254 
179 432 62 50 393 
270 118 261 309 30 
265 191 62 452 181 227 115 
269 346 134 412 31 458 129 
63 131 340 362 309 408 205 210 
179 151 62 50 393 
458 436 203 62 302 192 
242 462 13 411 
63 22 343 234 426 281 
405 455 86 269 191 340 56 429 
269 346 62 67 357 137 
242 462 351 62 496 130 309 6 269 
269 191 271 55 345 
63 351 47 309 218 197 39 374 260 
242 191 438 451 260 412 438 148 393 
269 346 446 264 
455 284 134 47 316 242 68 458 129 
370 133 47 129 237 342 331 304 208 38 479 
265 346 174 451 224 336 257 115 
179 282 199 346 88 469 
132 63 4 49 104 199 462 58 
158 133 497 340 142 127 180 
265 346 134 438 259 
269 351 191 340 426 441 405 
231 191 251 309 127 209 171 
458 250 271 289 68 
179 161 309 315 301 
179 151 54 309 65 301 
271 270 175 152 491 
179 432 460 92 
458 202 340 408 394 28 
496 114 306 234 257 297 33 203 272 375 
458 129 257 304 490 309 127 8 309 355 62 297 255 
265 202 218 381 
455 96 362 309 2 32 
458 175 193 309 65 257 466 
269 431 340 47 309 127 242 130 
458 202 340 408 394 29 28 
179 202 340 153 257 329 
221 11 218 
269 346 33 309 319 309 257 416 
455 483 269 346 453 309 127 62 50 260 
265 346 257 130 46 47 309 104 269 
257 133 193 
46 96 293 258 
335 7 257 437 336 257 441 
231 161 62 326 225 192 
458 131 134 408 394 28 268 493 482 
231 436 383 492 381 
179 22 83 309 127 220 254 257 28 336 257 339 401 
63 483 269 346 62 33 309 472 62 401 458 129 
215 287 271 28 
201 270 336 143 434 462 257 126 107 118 
38 265 122 127 438 165 
269 346 134 62 452 165 231 129 
458 129 92 250 152 271 222 336 61 123 
63 47 428 67 67 357 400 
38 63 362 309 258 
458 497 134 127 180 234 68 156 
63 293 309 127 198 309 104 257 97 118 
257 410 497 134 127 142 180 234 68 
132 455 110 269 191 357 
257 159 151 274 
428 273 47 152 116 
341 133 131 134 142 68 189 257 91 
269 284 127 50 
269 191 270 336 493 105 
269 11 127 62 323 59 
63 11 351 47 309 349 458 129 
458 273 473 309 59 269 
271 123 191 128 142 
92 191 340 196 33 309 2 458 129 
63 47 250 62 67 357 407 458 468 87 
458 284 134 127 92 
265 431 340 258 269 
131 455 177 227 265 
458 129 257 195 202 160 
269 346 152 45 489 
458 131 134 47 257 291 309 104 265 
334 133 202 134 68 189 257 222 
271 270 250 152 427 229 
257 341 5 257 410 
257 185 47 134 152 116 
179 22 128 309 127 203 357 102 
57 332 258 191 189 257 130 
390 497 134 142 127 180 234 68 
422 235 462 257 279 336 257 425 364 
455 4 134 372 349 46 
233 153 191 134 209 53 
63 471 340 86 487 144 257 419 
92 47 152 271 253 3 335 
257 334 129 257 44 11 121 374 217 
438 191 257 451 128 450 475 257 393 
132 271 455 104 340 311 254 
265 346 134 257 49 378 231 471 340 319 
458 129 237 62 263 4 134 127 226 142 
484 175 62 357 393 
269 497 486 381 242 115 
455 47 340 152 92 203 185 418 
63 358 47 426 441 
455 351 103 269 11 244 184 231 204 
458 346 355 62 39 494 
257 206 470 169 353 309 68 142 189 257 91 
347 458 346 52 309 218 264 265 346 50 
271 270 183 233 485 189 269 
476 133 497 134 142 127 180 234 68 189 257 222 
269 346 134 291 458 129 
179 471 340 104 269 458 129 
63 351 103 269 346 134 41 442 
265 346 214 261 309 62 391 336 337 375 
334 133 214 495 309 68 
455 296 351 30 330 
132 63 104 67 196 103 234 61 11 
203 481 438 102 462 357 
179 22 251 309 127 209 381 360 301 
390 47 134 129 14 316 257 60 
455 4 288 472 265 437 
46 284 86 46 106 124 
215 497 134 142 127 180 
383 22 83 309 127 437 309 450 
46 319 38 47 62 357 210 
269 462 62 130 336 210 
455 113 340 349 257 416 
257 410 22 209 
269 131 134 408 28 336 493 253 
269 183 189 62 210 336 95 27 458 129 
493 159 151 251 381 242 217 
92 191 271 367 146 268 233 278 
242 462 274 458 129 
370 133 495 
92 11 127 62 35 
257 159 475 257 215 44 151 54 309 127 209 229 
335 269 404 234 258 
215 129 257 77 122 47 491 266 241 
227 388 309 444 208 
455 483 458 316 257 291 263 
242 443 462 107 41 
66 133 129 271 263 250 152 316 
92 346 323 429 336 265 
269 346 469 231 129 
458 131 134 153 257 29 342 
455 191 134 453 309 82 231 129 
455 351 104 340 188 265 
257 162 497 244 266 418 
215 427 173 266 105 381 
455 473 309 104 275 174 130 
257 470 90 64 242 
257 299 131 134 408 28 336 257 141 
132 89 257 97 33 63 7 264 309 305 383 375 38 63 106 49 306 270 
231 187 233 210 9 257 259 
458 175 134 322 438 416 278 
365 133 497 134 127 142 180 234 68 
179 104 340 47 33 234 265 
269 346 453 309 127 62 243 458 129 
231 191 8 309 355 257 451 309 305 
139 22 134 251 309 65 
269 346 412 257 248 
257 476 399 495 309 68 289 189 257 443 
455 202 24 309 244 265 429 
242 4 134 319 189 458 129 
257 80 497 244 105 
132 199 346 257 350 
38 455 483 63 11 
179 2 245 201 29 
46 258 205 282 199 179 293 231 129 
467 215 133 353 309 68 240 131 257 370 170 
179 273 490 
132 179 47 62 369 
234 493 14 47 340 152 242 122 127 13 429 
63 188 63 432 453 309 282 62 391 336 438 19 458 129 
434 288 177 92 151 41 139 375 458 129 
265 462 257 130 269 462 
291 84 269 346 62 283 270 
269 346 357 350 265 462 453 309 121 
132 242 462 134 62 398 181 
132 271 367 345 191 226 56 257 51 
199 346 257 384 165 
179 104 199 179 362 
46 284 47 227 257 146 46 293 
265 202 127 257 443 
154 175 134 152 197 
458 129 170 133 202 134 68 189 257 443 
38 84 462 257 33 309 177 269 
84 63 47 332 33 309 104 265 
199 43 164 
455 351 473 309 282 245 309 62 357 315 458 129 
269 346 13 27 165 
455 96 110 455 250 62 437 458 129 
257 341 202 134 68 189 257 443 
92 191 271 367 68 475 257 185 400 
368 312 202 331 257 136 292 336 246 329 
92 175 152 271 343 3 335 
257 12 21 353 309 68 
458 129 265 7 351 324 257 451 260 
242 270 191 273 337 
84 269 11 127 484 
46 4 305 347 46 319 309 257 334 38 188 269 231 129 
271 270 191 491 203 493 253 
465 133 353 289 68 
455 250 62 357 441 405 458 129 
455 483 63 287 269 309 205 
257 70 131 134 142 181 62 295 
159 336 257 35 151 251 442 301 
63 432 220 189 269 458 129 
455 483 265 346 50 
95 295 191 209 442 156 
63 432 453 309 127 197 
458 11 65 309 496 114 189 301 
455 474 257 392 310 336 257 401 
63 47 474 309 408 205 327 
269 346 423 412 233 
179 131 134 86 179 497 160 309 257 164 
179 104 340 188 203 269 89 227 
347 63 2 415 265 63 4 305 
455 47 340 17 62 413 231 129 
455 131 340 372 6 309 349 269 
170 133 64 92 191 394 123 203 257 389 
455 191 351 310 336 257 141 
257 465 175 495 309 417 269 
455 86 458 462 189 257 71 
458 131 134 177 199 482 179 373 119 
63 362 309 349 459 
179 151 251 309 456 185 105 
81 235 175 62 411 
257 112 11 267 301 
63 471 340 187 485 415 242 458 129 
257 399 131 134 177 69 458 202 160 
257 12 21 353 299 68 189 33 346 91 
458 191 257 451 309 127 124 
92 346 45 139 357 400 458 129 
63 351 104 340 86 458 129 
458 129 455 104 340 188 203 199 46 188 
257 2 462 257 118 
438 409 94 229 38 462 251 309 456 414 192 
132 455 358 47 173 203 257 303 
370 133 495 309 68 189 257 407 
269 497 127 445 374 217 
257 195 22 427 442 156 
63 47 62 259 309 104 203 479 38 63 362 309 104 426 259 291 
271 35 191 251 324 301 
405 191 271 446 
38 265 191 49 447 270 
455 468 205 455 202 104 269 
265 295 214 462 251 242 217 
132 291 84 265 346 426 411 
455 288 483 268 269 458 129 
269 351 7 176 
257 303 191 413 189 77 
45 269 346 357 309 282 414 
458 129 458 202 160 257 263 
132 265 346 134 257 369 
242 33 122 127 446 
383 241 436 301 
269 191 62 357 33 309 305 
434 251 269 
257 325 462 134 357 
63 131 340 362 205 309 282 9 269 
458 497 134 142 127 180 234 68 189 257 91 
265 11 125 384 
455 250 62 326 225 415 174 211 458 129 
104 63 47 257 11 
215 38 29 133 353 309 68 
62 295 497 244 418 
257 303 11 35 189 257 181 374 217 
234 257 126 310 179 131 340 
271 270 462 412 173 
455 497 340 401 415 269 458 129 
271 29 28 47 152 209 
132 269 191 62 357 315 
179 151 446 344 179 151 257 97 
271 270 473 242 243 458 129 
455 497 340 349 62 118 231 129 
271 270 202 104 265 
227 257 410 22 163 
132 46 4 127 337 234 62 489 33 
370 133 287 271 28 336 257 407 
269 284 340 127 62 165 
265 346 227 455 4 104 
63 432 62 393 458 129 
455 103 231 431 340 
455 131 340 2 89 227 
458 316 62 50 2 
234 286 242 462 257 126 107 118 458 129 
62 263 462 251 192 
237 311 462 134 496 309 428 336 205 
458 346 134 453 309 282 394 336 265 
62 370 170 299 129 458 191 134 198 309 142 68 189 257 91 
179 293 62 391 336 258 
257 170 287 271 28 336 257 207 
455 473 309 349 205 231 129 381 
46 106 474 309 2 357 
63 47 426 27 411 
269 175 423 309 104 415 294 
455 284 47 200 269 190 
455 473 309 6 269 291 300 458 129 
257 138 354 368 462 125 309 35 189 269 381 242 217 
179 284 340 47 309 104 265 
132 455 86 92 11 134 127 72 247 405 
455 288 110 265 455 230 349 46 32 
455 104 340 372 362 309 282 9 269 458 129 
493 454 22 273 356 
63 362 309 104 199 346 291 234 242 338 
257 82 462 251 309 244 252 105 
63 351 497 340 55 205 
455 460 362 309 121 309 2 
242 462 270 336 493 275 
257 443 462 382 
63 432 67 337 458 129 
179 131 340 55 269 458 204 
132 458 129 265 202 340 55 173 
63 362 309 59 265 
179 104 340 362 309 119 269 
455 104 340 293 309 104 265 
265 11 244 378 324 257 384 336 257 115 
132 231 129 92 346 62 489 130 309 319 
257 325 84 462 446 
257 387 175 318 485 103 
458 346 288 152 62 117 330 
458 131 62 391 324 
455 113 340 320 199 458 431 
405 428 202 177 269 431 
179 250 271 429 309 166 245 13 333 
269 284 340 47 132 269 131 
269 346 257 29 311 
269 346 67 446 458 129 
458 346 220 300 231 129 
423 191 142 356 
202 179 202 396 234 13 338 
221 151 251 381 242 115 
63 235 86 265 
458 497 319 234 30 168 
458 129 458 131 340 47 28 336 257 407 
270 462 223 309 472 270 346 27 263 
63 362 309 314 233 92 415 286 458 129 
271 395 345 175 152 226 
132 265 191 240 337 240 179 474 
458 131 340 145 269 254 
63 49 71 100 63 24 269 
199 346 453 309 472 184 446 
127 24 62 330 458 129 
126 151 16 37 317 
46 351 47 309 319 
92 346 453 309 127 271 33 309 472 485 234 269 144 419 441 
63 432 134 8 309 305 439 375 
269 462 62 117 101 
132 456 34 458 322 458 202 71 32 
92 346 62 489 130 309 319 
269 191 257 451 54 397 336 257 441 
455 483 92 11 127 464 496 491 434 458 129 
458 346 62 310 336 242 387 
458 129 257 140 284 127 318 62 429 309 104 45 
455 351 362 309 127 223 
458 353 257 401 
257 91 191 64 56 257 470 169 
470 169 133 495 309 142 68 189 257 222 
132 92 462 323 103 234 72 247 
62 285 129 179 460 47 309 326 482 
265 346 134 257 130 455 2 
458 346 257 97 231 129 
269 462 67 107 309 286 
179 193 134 309 166 269 38 179 471 340 127 92 32 
271 258 7 142 
269 346 62 391 336 466 
455 202 24 309 86 14 163 173 422 129 
185 29 195 47 152 427 
223 326 462 62 230 
179 362 309 349 286 305 
458 191 209 229 
38 104 340 6 309 127 270 
63 358 104 269 242 115 
265 202 127 41 337 231 129 
179 244 205 100 179 311 458 129 
257 387 191 468 456 217 265 257 409 202 127 189 301 
269 351 431 340 458 129 
265 346 199 257 338 473 
257 70 131 257 291 118 458 129 
269 191 340 469 466 
154 66 133 177 271 263 175 152 316 189 69 309 207 479 
133 497 134 142 127 180 234 68 189 257 91 
242 462 62 172 71 
63 460 103 234 257 392 
246 497 456 487 53 
16 131 134 35 
455 483 257 424 4 48 227 257 258 269 4 282 458 129 
481 221 151 301 
38 63 432 453 309 6 309 282 270 374 115 
132 464 490 309 188 173 
215 133 36 257 77 132 353 309 68 289 
63 230 188 63 4 104 269 
269 346 429 458 129 
46 106 474 309 319 2 
257 222 214 356 265 
458 191 270 336 493 434 
269 284 127 257 29 130 447 
84 269 346 17 140 
458 436 456 156 
455 362 46 309 86 265 
257 370 299 129 
383 434 22 491 
265 263 191 226 53 
455 296 220 189 269 84 
455 113 340 177 63 106 193 458 129 
455 483 269 462 453 309 127 62 357 396 
132 265 94 309 59 242 115 
257 393 88 171 
458 175 134 193 309 244 257 259 344 
132 458 36 257 219 202 326 234 221 
231 202 134 408 289 28 
231 468 205 265 231 431 340 47 394 466 
458 131 340 86 14 437 173 
63 106 474 62 357 393 38 63 273 408 485 
455 131 396 233 203 270 166 
269 11 134 127 62 165 
84 269 346 263 33 
269 202 134 408 289 28 
257 341 64 269 
455 250 309 2 174 392 
246 47 495 309 68 
370 133 129 
215 131 134 408 28 336 257 482 
269 346 453 309 127 453 197 
132 29 329 131 134 19 257 82 
62 295 462 134 251 487 374 217 
265 346 257 101 
84 346 134 257 33 309 59 
455 47 17 227 174 387 
455 104 340 282 309 349 174 387 
455 129 265 346 474 309 319 
271 270 191 491 203 257 442 229 207 
38 92 22 241 336 205 265 131 265 
269 346 13 248 154 129 
269 284 127 251 
72 419 157 462 270 118 458 129 
84 179 122 47 270 
455 104 340 483 265 462 84 58 458 129 
334 133 497 134 127 180 234 28 189 257 443 
455 86 455 47 62 429 38 455 358 127 453 234 269 
269 346 134 62 61 118 
231 273 7 197 
257 247 191 322 301 
394 393 4 305 412 205 
265 284 59 
273 191 38 104 340 411 309 127 
140 133 47 353 309 68 189 493 222 
179 11 335 319 309 257 150 
271 247 191 180 
257 162 497 244 332 23 383 418 
257 348 462 84 185 375 
271 496 33 191 142 413 
13 409 462 460 308 130 
38 269 497 127 438 392 
455 6 134 309 483 336 265 
20 179 145 201 29 179 282 332 466 458 129 
257 401 497 472 270 
257 170 287 271 29 28 336 257 450 
257 425 342 214 175 404 234 238 258 
455 202 24 309 127 270 441 
336 257 439 49 1 175 306 257 321 
132 455 250 320 336 257 294 
383 381 436 89 257 302 
455 483 265 346 257 392 455 4 177 
455 351 113 340 104 269 
265 462 134 257 181 
179 49 183 269 245 439 105 324 174 417 
179 287 257 320 309 257 425 364 
269 191 174 451 259 
455 296 134 442 458 129 
231 214 495 309 408 233 153 
92 191 271 367 68 475 257 459 75 
434 24 309 6 496 275 
14 346 453 309 55 203 242 
126 47 273 163 324 
455 296 453 309 314 8 309 282 92 
242 191 446 
63 182 240 62 393 38 63 47 306 269 240 270 
179 122 351 134 127 485 309 269 
269 191 72 107 451 441 458 129 
242 497 384 257 409 
455 104 340 24 297 378 
319 412 205 38 46 358 127 437 
132 242 462 62 101 
257 33 175 218 458 129 
31 346 476 109 353 68 
179 104 340 483 268 476 
257 328 175 129 257 396 346 134 469 
455 388 309 257 398 302 
132 269 346 107 309 47 434 46 86 
242 462 62 357 403 
132 63 7 254 189 136 38 455 358 244 257 305 
246 493 375 151 376 
63 11 134 207 309 75 205 254 458 129 
257 443 462 460 308 409 
215 209 271 28 
257 401 462 54 309 127 382 56 257 384 336 122 
132 458 129 269 202 134 314 173 254 336 376 346 395 
383 29 387 312 22 214 427 
377 434 22 427 
45 199 346 257 48 336 453 189 
269 351 191 340 291 
298 462 257 451 165 
269 191 62 337 294 
465 133 497 340 142 127 180 234 68 
221 151 54 234 374 115 
458 381 388 197 9 257 260 
423 63 497 104 265 441 458 129 
63 362 173 309 218 197 458 129 
257 409 94 203 122 
92 462 271 396 458 129 
231 131 340 408 233 153 
242 281 175 152 446 
269 346 453 309 244 62 430 309 311 254 
104 46 349 354 
271 270 175 152 356 3 301 
62 350 225 191 413 234 376 
455 483 269 11 127 62 50 50 396 
265 490 309 127 62 452 463 234 257 370 38 31 
351 268 227 222 129 242 
257 325 462 308 320 
46 351 104 340 104 265 
269 358 273 127 257 97 
45 199 346 257 369 
132 179 122 127 41 442 
395 159 22 251 176 156 
45 269 191 62 50 397 
269 346 62 387 101 
357 401 231 129 
38 265 462 257 165 
132 199 462 257 378 336 186 16 
458 131 340 91 394 327 
179 284 408 205 309 286 
215 131 134 6 309 55 205 
455 104 340 483 269 11 
63 11 121 257 44 
257 263 490 309 47 152 316 442 456 217 
132 462 269 288 257 97 
257 434 362 59 231 129 
434 460 362 309 349 269 
10 471 340 319 309 304 208 
458 191 228 266 434 491 
246 151 300 375 
63 182 62 357 260 
455 296 134 453 309 68 
63 188 265 179 11 19 257 459 162 
257 112 175 79 
257 341 64 257 222 
458 346 351 41 357 
179 22 427 456 217 
63 432 134 62 117 178 
126 22 437 203 257 211 
179 47 306 212 336 13 456 272 375 
179 284 340 104 286 265 130 
63 104 340 483 63 131 
455 351 103 309 2 62 357 397 
231 131 227 257 291 275 
299 159 22 134 251 324 53 
458 131 134 65 62 60 371 332 68 
455 497 340 71 458 129 
269 284 127 271 165 
63 131 340 282 9 227 336 265 
257 133 129 257 120 22 52 309 244 13 454 415 205 
63 104 340 362 309 48 173 41 176 
132 265 497 244 33 
428 57 214 7 475 479 
458 131 134 177 69 394 345 202 127 226 
265 346 134 67 357 
269 462 382 458 129 
215 202 134 68 
63 497 47 67 357 159 458 73 
242 4 134 127 52 458 129 
231 351 175 340 250 33 309 401 415 242 
63 104 240 63 432 468 46 86 
337 280 257 140 
63 47 126 336 265 
455 86 458 358 104 269 
455 104 340 362 309 153 493 329 458 129 
460 458 131 340 483 458 202 305 156 346 294 
269 346 62 337 260 
231 131 340 47 309 127 92 
38 179 131 257 97 118 
266 329 122 127 73 
77 133 129 
257 80 151 125 309 456 487 257 384 336 257 34 
269 346 33 309 104 174 259 
132 63 131 340 104 265 
179 22 72 107 310 336 174 210 
126 151 475 257 425 364 
62 263 462 251 242 217 
265 191 62 117 2 
257 260 462 446 
132 257 219 129 269 202 134 197 280 
92 346 62 357 429 309 305 291 84 458 129 
347 179 151 134 209 199 462 257 411 
269 191 257 392 310 336 174 210 
257 277 346 90 495 309 68 
92 191 271 367 68 475 257 352 341 
132 455 4 282 269 291 197 
46 351 47 309 314 220 
242 462 310 336 269 
458 346 474 309 282 254 336 269 
92 462 214 257 181 336 304 208 346 339 313 
377 241 214 22 163 360 257 253 
132 231 497 340 104 246 
257 341 131 134 417 28 336 257 80 
63 293 309 104 265 
132 84 269 346 62 50 60 
455 103 309 127 197 458 129 
132 269 346 134 265 117 62 401 
46 96 113 340 305 
458 353 309 68 289 189 438 153 59 
269 346 257 40 33 62 263 175 152 187 245 
458 250 152 189 257 259 49 62 217 
46 474 309 127 92 
455 202 340 187 269 236 205 
269 191 340 99 347 257 370 341 202 160 229 346 263 
46 151 273 200 
455 483 269 346 274 
257 166 462 453 39 
269 191 251 309 181 62 91 189 192 
455 131 340 362 265 
63 468 205 179 151 134 52 309 311 92 
465 133 497 340 127 180 234 68 156 
265 346 257 153 336 257 260 
458 11 127 116 192 
269 191 469 144 265 
269 431 340 384 264 458 129 
242 11 127 13 451 419 
38 269 471 340 59 
46 104 340 282 184 254 
493 222 497 134 142 127 36 
455 351 183 245 189 257 197 
92 191 62 165 57 
458 131 134 142 417 289 28 
455 202 24 309 86 199 346 453 189 458 129 
265 346 310 336 269 
170 133 131 134 142 68 189 257 207 
458 191 41 357 405 
132 324 257 281 462 469 455 358 47 174 441 
455 103 455 358 127 198 309 319 172 458 129 
63 4 134 408 485 
269 346 134 291 298 129 
257 496 313 191 251 309 315 374 115 
242 462 357 350 234 257 76 434 405 
63 86 265 63 47 309 320 173 
335 32 179 122 134 
46 432 134 453 309 47 62 429 309 305 
63 151 453 309 472 269 309 257 395 439 
132 269 11 127 62 430 487 458 96 462 
92 471 340 127 221 
455 468 173 455 110 455 497 96 258 173 
231 346 134 453 309 408 242 309 184 89 227 
257 476 129 269 11 160 
179 250 271 289 28 189 438 102 
458 462 251 92 189 171 
434 22 8 309 282 205 280 38 282 269 254 
458 346 62 117 310 336 269 
63 47 309 6 309 244 269 197 
62 341 299 353 309 68 189 257 91 
458 497 134 127 180 234 68 189 301 
458 431 242 447 
92 11 127 72 160 
231 191 270 336 439 317 14 436 
231 175 271 317 336 233 27 
271 470 87 22 52 309 25 257 304 
455 106 474 62 489 130 309 319 
132 63 113 340 104 265 264 
265 346 134 257 396 
179 47 423 309 104 415 242 
231 191 351 41 357 405 
269 346 469 257 136 
426 338 462 39 
455 191 67 337 458 129 
242 11 127 62 67 357 25 458 129 
383 434 22 491 38 439 22 427 
455 351 468 205 309 244 13 33 458 129 
242 462 257 263 455 316 
179 151 484 255 38 1 
63 188 92 151 332 
428 7 300 415 423 
132 269 346 134 172 
257 441 462 134 469 
257 299 14 495 309 408 438 153 287 271 28 
257 21 452 191 491 
458 250 271 289 146 
269 353 289 68 
143 434 151 273 453 309 408 46 62 429 
257 140 11 311 240 269 284 
246 388 412 173 
257 328 175 423 309 104 415 242 458 129 
92 22 271 367 222 336 123 
458 191 62 393 494 
133 64 269 227 
269 346 67 107 309 258 493 400 265 151 491 
455 351 131 340 305 38 265 346 310 336 257 260 
63 113 340 59 269 
131 231 483 459 191 58 
231 191 198 309 104 246 
455 113 340 282 394 146 231 129 
46 4 244 265 270 309 257 365 
242 462 62 117 310 336 174 210 
257 159 151 134 251 487 374 217 
63 47 146 
132 92 191 271 270 309 55 205 
269 431 134 311 234 195 
92 191 271 239 264 
132 265 191 240 357 240 269 474 
179 432 134 407 234 257 451 33 
484 462 174 338 
133 129 269 497 244 485 309 383 492 
242 462 174 270 33 
347 46 104 340 46 471 340 
179 351 131 340 362 309 267 415 173 458 129 
92 22 271 28 268 466 
455 483 269 462 67 337 309 256 200 
269 346 257 206 130 
132 423 462 469 
458 129 179 11 68 374 217 
179 22 413 309 267 32 53 
63 103 269 462 271 117 165 458 129 
132 458 462 134 89 438 392 
257 150 462 84 261 56 62 148 328 494 
242 462 257 33 63 413 485 234 
179 122 134 293 269 
84 455 358 6 32 
179 495 309 472 394 68 
57 271 123 175 152 128 3 
63 96 473 309 305 242 260 
455 273 110 179 358 417 286 458 129 
269 175 152 351 50 
29 133 495 68 
458 191 427 234 343 
269 346 134 227 311 
38 265 346 134 125 
266 434 22 128 163 
269 191 438 297 424 321 305 336 257 281 
46 104 340 47 309 
271 153 191 209 
458 351 471 340 24 269 
257 341 191 251 309 160 229 346 295 
257 419 191 486 49 309 51 312 
179 47 317 
257 400 362 309 2 
231 131 134 408 28 336 257 407 
257 283 303 129 257 91 202 134 127 209 
347 179 362 459 63 11 408 205 459 
63 151 8 309 305 257 260 
248 353 309 68 
30 462 309 60 176 221 
257 21 131 340 142 68 
132 179 214 188 265 82 497 127 257 456 270 
257 476 129 269 202 160 257 295 
179 353 394 68 
84 458 462 257 277 
347 455 296 198 455 362 309 127 24 233 231 129 
143 159 22 251 458 129 
159 151 251 381 242 115 
63 11 273 408 203 
265 35 462 54 229 
179 151 251 309 331 185 16 
458 131 134 408 28 336 257 411 
92 191 271 367 68 475 257 304 
257 241 235 47 152 209 
84 265 63 151 451 63 483 63 4 305 
159 22 322 144 257 137 382 
143 151 434 14 96 104 357 275 
63 47 196 19 
458 129 458 11 134 160 
272 418 381 62 401 191 180 
496 114 191 233 374 55 
458 497 134 177 69 257 60 191 316 
257 40 330 191 134 491 
92 11 134 127 459 
179 131 134 417 257 330 346 153 
455 106 152 220 189 242 405 
46 104 340 86 184 
455 106 273 473 309 282 62 259 
63 293 309 2 332 375 
179 246 22 195 
257 49 118 458 4 104 462 59 257 260 
63 497 47 62 51 
159 22 251 309 244 266 105 
395 159 151 309 127 209 56 374 217 
269 346 134 62 117 401 84 
242 471 340 127 62 117 401 
63 104 340 47 265 264 
257 162 230 121 
46 106 474 309 311 415 205 
257 295 490 309 47 257 75 336 248 
63 202 103 265 242 462 134 257 456 
271 270 11 127 198 309 55 269 
72 299 44 191 308 130 
231 436 62 115 18 
46 188 184 291 
269 346 460 453 309 244 62 323 33 
63 273 193 189 62 401 458 129 
455 47 271 165 415 257 168 
458 175 495 309 267 415 87 
458 191 257 49 270 427 
63 460 104 340 86 
455 131 340 483 455 202 282 92 
455 47 62 310 336 173 
458 346 257 416 336 426 178 
269 431 340 351 177 63 104 340 24 46 
455 468 205 455 11 38 455 11 458 129 
428 275 273 59 57 
458 462 251 309 127 228 257 451 434 124 
215 202 134 68 189 242 
458 284 47 152 124 489 18 
269 191 351 62 50 260 
271 443 175 316 269 309 409 
269 191 332 336 62 210 263 
132 92 462 270 117 165 
92 191 271 367 68 475 31 189 257 343 
458 462 257 330 336 257 416 
92 22 271 222 336 
283 353 68 
132 269 191 446 20 231 388 324 257 398 
63 11 47 428 327 
455 47 226 383 203 62 115 
269 346 41 176 309 177 231 129 
455 483 269 346 50 458 129 
84 63 432 453 309 396 234 438 417 
62 263 191 251 229 
458 131 257 291 118 
132 455 191 134 491 
455 104 340 86 199 346 453 189 458 129 
132 242 497 134 127 36 
265 346 199 269 462 
458 129 179 11 160 257 295 
242 122 47 152 257 384 
458 436 430 256 226 309 257 302 
265 175 152 17 
242 191 62 50 260 
458 131 275 100 458 110 257 22 291 
455 202 24 309 86 199 191 453 189 
269 346 288 152 265 130 231 129 
63 11 47 354 
370 133 250 271 367 68 
265 346 199 96 163 286 
139 312 336 257 215 75 22 148 170 434 
257 330 191 209 266 492 18 
55 242 123 
455 202 104 257 97 458 129 
455 188 63 4 104 50 275 458 129 
179 373 293 257 466 
63 362 309 47 62 401 
271 80 22 161 
265 346 257 130 63 362 269 309 127 
269 462 134 426 101 
265 346 199 455 293 
63 131 340 315 257 396 
63 47 41 139 327 336 426 27 
269 131 134 408 438 153 
132 455 131 340 86 257 260 
132 275 151 84 308 320 
458 131 134 177 14 179 22 
265 346 270 130 309 187 269 
63 47 309 177 242 
132 46 104 340 47 309 483 257 97 
271 29 164 250 332 23 185 
455 351 131 340 86 14 458 191 
63 284 127 203 269 
63 106 273 250 327 24 242 458 129 
265 346 199 357 275 104 
215 250 271 68 189 257 91 
132 455 497 340 258 269 
455 24 257 463 
38 458 131 340 47 309 104 242 
63 47 423 309 104 415 143 434 458 129 
92 230 127 428 29 130 231 129 
63 106 316 269 274 458 129 
265 443 462 460 308 130 
257 162 462 251 309 244 266 105 
179 4 134 121 458 129 
84 63 230 305 269 
458 497 71 234 419 89 265 33 
265 462 134 199 458 356 
179 104 134 362 459 
179 47 327 
257 470 90 214 495 309 68 
257 465 353 367 68 
231 358 293 257 466 
269 183 184 62 217 309 282 469 265 231 129 
30 70 52 173 309 65 
132 458 11 104 438 27 118 
46 351 187 485 415 143 275 
455 296 453 309 282 265 270 
57 80 11 121 189 257 181 
63 362 309 305 257 78 
455 191 351 62 330 415 62 165 
63 151 134 342 
179 230 258 286 84 
242 462 174 451 33 
215 209 271 29 28 268 257 207 
133 129 179 202 417 28 381 203 257 441 
269 346 62 357 59 
231 96 191 340 9 269 
269 175 152 62 67 489 464 418 231 129 
84 179 151 343 197 
269 84 175 323 398 19 
242 462 351 257 451 441 
455 473 269 309 384 132 455 131 340 362 269 309 384 
458 346 134 453 309 282 269 
458 214 129 257 253 202 121 
132 265 191 134 62 165 
242 462 351 30 310 336 257 101 
132 269 462 84 274 265 231 462 134 
458 131 340 372 362 309 396 
63 86 179 151 453 309 207 286 189 242 
257 299 353 309 408 28 
132 458 346 251 309 311 254 156 
257 370 170 191 79 234 68 
63 86 199 265 462 
46 113 340 71 300 
132 458 129 63 483 63 86 428 336 205 
227 151 475 257 389 
265 346 310 336 210 231 129 
269 346 50 309 47 233 453 412 184 
45 455 296 453 309 244 265 189 
185 112 312 131 134 35 
257 396 462 107 458 468 87 
269 346 257 126 107 118 
257 222 11 127 209 53 
458 64 227 482 412 173 
455 483 265 346 257 130 309 319 
92 346 474 309 127 62 130 
458 495 309 472 394 68 
269 346 351 41 176 
265 191 335 38 242 462 84 
31 346 21 495 309 68 
63 104 340 274 205 415 255 
458 131 305 257 374 383 448 132 202 340 282 30 
80 151 54 309 121 242 217 
291 84 92 462 423 
38 269 191 340 257 451 33 
377 434 22 491 
63 362 309 305 242 260 458 129 
257 341 175 353 309 68 189 257 443 
38 455 47 269 38 455 11 104 269 
179 183 269 415 205 
242 462 351 257 451 447 
458 129 46 358 349 
257 195 47 64 257 482 
257 120 193 
84 92 471 340 127 270 
269 462 340 38 269 191 340 458 129 
257 433 411 309 160 
144 257 463 458 129 269 202 127 438 456 396 
139 373 134 218 197 
132 258 462 189 257 130 
231 346 249 269 324 
241 177 269 471 340 127 257 97 
38 265 346 351 242 115 
206 133 353 68 
271 247 175 152 180 189 237 62 112 
179 47 50 400 
269 191 209 442 156 
455 296 453 309 349 173 291 84 
63 474 173 254 336 264 
132 455 284 47 276 383 
458 191 340 257 49 270 14 250 327 
269 471 340 258 184 305 174 374 315 
63 250 423 360 257 243 458 129 
63 47 309 319 234 224 
92 462 271 411 234 10 
215 133 250 271 367 68 
132 265 346 304 208 
455 106 288 152 257 97 130 458 129 
62 496 33 191 134 413 
289 28 22 309 127 322 301 
458 191 381 209 475 302 
257 263 191 226 229 
257 91 191 209 229 
458 131 134 65 62 60 234 68 
257 452 78 168 462 272 
257 419 462 53 
257 370 164 109 214 250 271 367 68 
63 11 6 426 392 
455 296 8 309 305 
231 250 152 437 203 257 211 
45 63 151 453 309 47 309 315 89 257 197 
92 462 45 196 33 309 483 
257 400 497 134 142 127 180 234 68 
408 286 257 146 38 63 358 314 143 434 254 
458 131 340 86 438 153 
63 362 309 127 310 336 257 424 
242 230 134 121 
269 191 62 489 217 
458 131 275 100 458 110 179 22 291 
132 458 462 340 257 49 270 
458 124 62 464 275 
426 311 11 319 189 
458 131 340 301 
11 269 311 203 434 
14 462 453 144 46 
269 284 340 47 
46 151 62 357 330 
458 353 289 68 242 217 
269 358 273 96 311 132 179 358 314 8 
455 106 273 152 265 130 
179 113 340 59 
38 344 227 462 134 17 
92 346 453 309 127 62 391 336 337 375 38 63 432 453 309 47 309 282 111 309 269 
126 22 120 
179 11 267 234 257 451 33 3 335 
132 265 202 134 125 127 257 443 
179 129 46 47 309 319 197 
63 103 423 11 59 234 286 458 129 
179 284 127 332 486 
383 22 163 38 383 22 491 
455 351 113 340 314 485 
347 179 151 63 11 
455 483 269 191 257 291 118 
269 191 134 274 69 92 22 16 37 317 228 493 163 
269 191 62 50 315 
92 462 134 62 429 265 92 346 453 309 127 62 401 458 129 
63 47 309 55 269 
458 307 309 2 227 257 33 
458 436 190 242 115 
395 159 22 340 251 487 229 
132 84 455 104 340 86 
455 351 24 257 333 336 269 
299 159 22 340 251 487 301 
269 490 309 127 220 
132 269 471 340 127 426 456 
269 462 134 62 357 325 
132 458 131 134 166 485 89 257 225 
257 146 497 134 127 36 
455 483 63 474 269 316 231 129 
428 11 127 226 469 
455 86 423 268 173 
269 495 309 68 289 
139 129 179 202 134 65 309 257 338 
455 188 269 4 127 
458 404 234 13 367 417 336 257 383 195 
366 225 
132 269 471 340 127 242 115 
275 122 127 446 84 
455 284 47 306 458 129 
37 46 4 244 345 291 300 
257 374 260 462 171 
455 351 104 340 188 269 
179 110 268 269 
257 170 353 68 
132 455 47 340 318 485 103 
458 346 474 309 145 269 
179 22 288 50 
458 462 257 277 
458 129 458 111 126 336 257 466 309 258 71 438 295 51 
265 407 183 378 456 34 
455 497 340 82 62 118 
133 353 289 68 
269 346 351 152 50 
360 257 281 179 250 257 348 
439 492 381 458 261 257 398 66 169 
132 92 346 62 165 415 422 
63 104 134 472 257 350 
257 370 164 109 495 309 68 
458 131 340 24 199 458 356 
257 343 230 55 84 458 129 
92 22 271 367 222 336 491 434 
458 316 271 395 477 
179 287 271 29 28 
179 11 319 234 269 458 129 
455 104 340 483 269 11 127 41 489 
63 432 220 189 269 84 458 129 
169 133 495 309 68 376 
269 474 428 466 132 204 269 11 49 456 439 418 
257 294 462 376 
89 257 97 33 458 129 10 131 62 357 259 
133 47 495 68 189 257 91 
269 346 134 24 455 163 257 277 458 129 
455 96 474 309 319 
269 462 134 99 69 257 409 191 486 309 257 398 
257 409 462 251 309 456 212 418 
132 269 346 62 294 412 33 
257 172 90 495 309 68 189 257 443 
455 473 309 472 233 82 
46 131 340 177 269 
231 131 134 142 68 
265 346 62 263 265 460 175 309 127 316 
265 346 134 257 130 455 104 101 
257 481 497 134 127 180 234 68 189 156 
269 284 127 62 357 217 
269 191 134 257 118 309 104 
265 191 174 224 324 257 384 336 257 115 
201 250 152 437 203 257 211 
272 241 214 47 152 427 
132 458 4 104 265 374 217 
63 49 17 270 260 
92 191 214 271 367 68 475 12 37 352 390 
455 86 455 191 340 92 458 73 
269 131 134 413 245 62 77 
257 28 11 127 182 254 203 257 374 464 105 458 129 
231 471 340 127 257 456 
242 4 273 127 226 300 
257 465 129 269 11 417 28 381 
132 458 202 134 408 394 28 
241 244 13 378 
458 214 129 257 80 202 121 376 
347 269 131 340 311 254 63 497 244 62 429 
216 390 47 495 309 417 394 28 
265 191 487 257 294 
455 177 46 284 340 
269 191 257 49 263 309 244 
92 11 127 176 221 
45 199 346 453 189 
271 263 462 251 487 374 115 
132 269 346 469 234 173 242 115 
458 175 64 227 257 482 412 173 
257 354 465 495 309 68 
465 133 497 134 142 127 180 309 68 
63 104 340 86 438 153 
231 346 273 453 309 408 485 
257 12 191 427 
84 63 47 180 257 369 336 263 458 129 
257 35 462 54 234 156 
269 346 257 243 265 431 340 384 
231 191 134 491 
455 131 134 311 234 174 341 37 30 341 231 129 
179 129 57 265 62 68 373 127 316 381 
257 302 250 271 68 
92 346 271 130 309 86 
57 271 123 191 128 
455 351 113 340 188 269 
455 471 340 188 269 487 455 349 173 458 129 
269 131 340 472 466 487 456 115 
46 104 340 282 265 270 
265 175 309 59 
257 80 331 257 425 364 304 208 444 208 255 480 38 1 
84 179 86 458 462 
455 103 275 311 254 
63 11 396 426 341 203 62 334 336 248 458 129 
269 346 134 274 69 458 191 209 
269 373 351 311 
487 84 227 22 283 
38 179 131 340 319 234 265 
271 96 179 151 
57 269 175 134 152 111 
455 103 458 471 340 104 265 277 10 468 87 
62 35 191 251 192 
458 129 269 202 127 438 456 
257 277 431 340 24 269 
458 175 152 445 3 456 115 
265 191 134 72 181 
203 422 257 370 164 109 129 269 202 47 271 367 68 
265 443 462 460 308 44 
132 63 47 340 306 344 
269 346 62 323 118 132 269 346 62 118 
92 191 271 123 128 192 
455 96 104 340 47 394 68 231 129 
265 346 357 465 
92 462 288 103 
455 483 268 29 275 
132 179 358 273 349 265 
63 104 340 177 242 
393 133 129 179 122 160 257 295 
458 462 309 65 309 422 189 376 
269 191 340 257 392 33 
269 131 134 177 69 269 202 244 289 345 
242 146 4 134 127 209 62 334 285 129 
132 455 104 257 291 118 41 
257 294 462 54 234 171 
45 63 358 311 189 265 
35 234 257 328 
257 409 462 251 309 456 414 192 
63 432 62 446 393 
46 113 340 320 257 416 
269 191 226 475 286 
269 373 134 384 92 
455 351 250 309 104 269 
46 47 309 2 369 144 369 
257 341 64 394 237 411 
38 265 462 257 164 51 
455 351 103 179 432 291 458 129 
132 455 296 453 309 2 234 223 
257 164 109 250 271 367 68 189 257 59 203 278 
231 113 340 177 265 
132 458 468 184 455 191 50 
458 287 271 28 132 129 92 22 271 29 327 
46 113 340 319 309 377 
422 361 257 482 
347 269 202 96 311 455 202 
257 352 486 462 438 451 452 336 257 115 
242 462 257 165 
269 191 257 451 450 128 203 257 496 115 
455 202 340 187 269 236 173 
458 388 189 268 438 101 
309 205 269 346 13 259 
257 341 175 340 209 394 29 28 336 257 401 
38 92 22 241 
269 346 453 309 244 33 
455 131 340 362 309 104 265 
257 465 64 265 62 263 250 152 180 
139 131 134 65 
242 11 127 426 463 
455 96 362 309 2 415 269 
133 202 134 408 28 301 
455 104 340 86 14 458 462 
458 175 129 458 11 134 71 234 257 277 32 
227 479 462 486 309 205 
265 346 62 446 118 458 129 
199 462 257 48 336 257 425 342 
63 273 474 309 265 369 
92 191 271 367 299 68 189 257 91 
231 351 250 309 104 269 
242 393 462 62 357 393 
269 346 257 49 130 309 244 269 
458 287 271 29 146 
132 347 458 462 427 458 202 340 60 286 
455 104 340 483 92 358 127 62 165 458 129 
63 47 340 152 198 309 104 265 
269 346 24 231 306 257 294 
387 312 497 134 142 127 180 
335 269 346 41 442 
434 129 179 202 24 309 349 184 71 
272 241 22 491 203 257 207 
62 51 285 129 458 202 47 271 68 189 156 346 295 
265 122 134 127 257 443 84 
63 250 139 491 400 
32 269 175 309 104 415 62 396 
269 462 453 309 244 33 
347 179 362 309 472 62 401 179 11 
132 84 462 446 
227 439 129 179 202 160 
269 175 355 257 419 265 202 340 384 
231 346 306 324 38 231 11 305 32 
455 104 340 483 242 11 127 257 443 458 129 
257 425 364 204 269 175 271 237 278 
231 436 381 203 257 302 
455 362 309 47 62 357 33 
164 419 133 129 179 250 271 146 189 257 123 
45 179 284 483 268 265 
63 11 267 32 
179 151 453 309 293 227 257 19 63 4 408 205 458 129 
231 202 408 271 29 28 
92 462 271 459 234 223 458 73 
284 179 47 218 415 286 
370 133 47 353 309 68 
265 346 227 10 129 
242 11 244 33 
63 47 67 323 84 
257 477 131 340 408 394 29 28 
12 215 353 68 
455 106 152 337 231 129 
455 191 340 92 458 129 
269 462 134 257 443 
395 159 22 251 309 127 322 192 
62 476 169 285 129 257 169 250 271 68 
46 351 47 309 319 234 269 
66 133 353 68 376 
479 175 185 448 
379 398 19 257 425 342 462 423 
46 351 47 309 320 269 
458 191 226 309 62 302 
493 278 331 
269 131 340 55 487 458 436 
269 346 227 37 423 
455 483 179 86 265 
271 270 191 491 203 394 336 257 253 
154 133 131 340 142 68 
227 22 209 376 
72 21 285 129 458 250 271 367 68 
179 182 240 62 393 
271 385 28 22 318 
455 86 455 4 104 269 
132 455 106 474 62 489 130 309 319 
179 432 92 41 
257 248 175 273 152 111 
179 47 257 333 84 
92 191 271 367 68 475 186 170 133 
458 191 273 257 97 144 265 
269 161 309 181 62 477 381 
62 443 497 127 316 234 265 
92 175 309 127 345 
257 12 21 382 245 257 389 
132 179 151 134 92 
455 86 265 458 129 
455 351 474 264 458 129 
63 104 340 86 199 346 453 189 458 129 
63 110 458 202 
269 346 233 33 41 
265 346 134 257 49 59 
291 84 455 86 423 346 453 309 71 300 475 184 
458 191 62 117 38 39 330 
455 129 455 104 340 86 
138 133 129 383 434 436 
458 473 309 314 453 
257 477 287 464 29 28 132 161 309 417 332 381 
242 270 122 134 127 
257 285 495 309 408 289 28 
455 288 473 309 2 264 
38 265 346 134 291 
179 22 357 195 
458 129 257 330 122 127 116 
29 496 393 312 151 
271 270 4 244 265 300 475 184 
455 110 455 145 62 357 437 458 129 
179 351 24 309 258 434 
455 86 455 358 273 127 257 97 
45 455 483 269 191 357 
271 270 307 221 
455 104 340 362 309 127 132 455 113 340 320 265 
257 243 462 134 469 344 
269 346 50 309 127 172 458 129 
269 191 134 99 69 458 202 267 257 277 
112 312 497 134 127 180 442 192 234 68 
63 358 86 205 20 63 282 205 
63 293 332 434 24 46 
265 191 257 384 336 265 458 129 
257 12 170 129 269 202 47 271 367 68 
455 296 453 309 2 234 223 
257 28 151 309 127 209 381 
269 462 62 117 59 231 129 
63 104 340 483 458 307 459 
438 153 191 134 209 
269 358 127 62 59 
84 269 175 95 456 429 
269 346 72 486 140 458 129 
46 432 8 309 187 257 77 254 
92 235 47 152 327 
269 346 67 107 146 
132 269 131 340 258 405 
92 191 271 367 68 475 257 465 
269 346 33 309 472 459 
428 434 24 184 241 104 340 458 468 87 
265 202 127 257 341 
455 351 6 100 455 362 309 472 496 168 231 129 
458 129 332 434 373 127 116 
132 383 492 381 269 191 469 
271 29 28 22 128 
257 291 118 309 104 462 423 
335 179 182 257 40 413 
383 434 250 436 
455 106 474 309 188 265 63 4 104 269 
63 106 474 62 429 
458 462 309 25 255 38 480 242 217 
132 265 346 310 336 257 260 
63 351 293 309 408 205 33 
458 129 383 332 317 436 381 
92 191 271 367 68 475 186 133 
218 254 38 349 286 
269 346 257 433 
265 346 257 49 118 455 104 340 24 
132 265 191 268 309 59 
63 47 309 188 265 63 4 104 269 32 458 129 
372 84 455 4 134 188 269 231 129 
458 175 134 152 209 
104 46 362 309 384 485 24 242 
231 431 340 24 269 
132 265 346 453 309 218 
455 202 24 309 319 197 38 258 434 14 474 491 475 257 243 
455 296 273 453 309 472 269 
63 129 434 22 453 309 218 38 179 131 
38 92 346 62 130 38 92 346 62 130 309 55 265 
269 346 50 309 47 62 496 210 
132 63 47 271 68 189 265 
257 297 462 251 309 127 200 56 257 384 336 257 115 
257 186 341 495 
179 47 309 104 13 259 
257 126 107 118 462 459 
458 191 24 387 
455 250 62 50 33 231 129 
63 104 134 96 86 
13 160 191 361 156 
458 202 340 408 438 456 153 
179 427 270 330 
257 439 22 427 171 132 47 134 152 116 
132 455 113 340 104 265 
231 129 231 131 134 86 69 150 202 244 394 345 
458 497 134 127 180 234 68 189 376 
269 346 67 446 475 456 115 
231 142 193 309 258 
269 462 54 309 456 234 252 492 
132 269 346 214 8 309 472 62 369 
455 483 269 346 62 50 420 
133 497 134 142 127 180 234 68 189 257 443 
269 191 257 291 378 231 129 
132 63 11 127 197 
269 460 175 340 145 184 344 
179 104 340 86 199 269 462 
179 11 134 47 309 166 485 
203 422 62 164 109 285 129 458 250 271 68 189 257 91 
237 62 82 191 251 
92 22 340 394 
63 432 453 309 6 
458 204 458 462 62 186 366 
269 462 351 62 387 263 265 231 473 309 472 
63 86 63 4 305 
63 151 62 67 425 393 
63 358 127 62 39 328 458 129 
242 462 67 107 458 129 
92 151 134 62 391 336 434 14 287 286 394 103 234 269 
458 436 240 231 445 173 
257 29 462 265 257 424 11 319 189 
395 159 22 251 229 
479 175 323 320 469 257 389 
455 104 340 483 179 111 269 309 472 13 263 
269 346 96 107 231 129 
62 40 447 462 54 381 242 34 
92 471 340 127 41 139 434 14 4 104 265 
269 346 460 41 176 231 129 
257 352 434 151 62 50 434 
63 106 249 428 336 257 97 275 
455 47 62 429 189 171 309 305 30 270 
92 191 271 367 68 475 257 12 21 
455 104 340 483 265 346 257 443 458 73 
455 104 340 362 309 55 84 
455 296 453 309 282 242 
458 460 175 134 152 124 
242 191 270 336 205 
179 131 134 417 394 332 28 
95 91 462 251 374 217 
269 191 340 438 441 
425 342 215 495 309 68 
257 285 129 62 263 11 127 322 56 257 384 336 374 217 
257 181 462 466 
438 285 129 269 191 72 21 181 
265 122 244 62 430 
265 462 257 341 346 259 
46 202 134 47 249 237 345 324 
257 162 497 244 105 
458 287 271 28 336 257 247 
269 202 127 50 347 265 346 257 443 
231 17 257 451 377 375 
450 462 234 227 336 286 
57 257 403 460 462 134 251 309 355 248 
132 458 191 340 413 234 210 
63 358 351 47 309 319 234 269 
458 129 458 250 271 28 
269 131 134 153 257 338 
415 257 496 488 231 202 340 47 309 
242 247 11 486 255 346 137 309 257 425 364 
257 170 129 439 120 22 163 
63 351 473 309 166 265 63 19 459 231 129 
265 346 257 392 63 4 104 291 84 
132 179 293 258 
72 12 299 36 257 91 
455 131 340 24 257 123 
62 395 263 175 134 152 316 
455 35 100 455 47 265 291 
257 302 131 134 68 
257 435 70 79 140 133 
334 133 214 353 68 156 
132 269 346 273 41 442 309 104 257 291 118 
257 302 353 309 408 289 28 
92 22 185 336 205 
132 458 129 154 129 458 122 134 47 257 33 
132 455 104 340 483 269 191 257 291 33 
63 358 6 426 392 
257 396 191 41 337 309 60 
132 265 346 134 496 
62 263 462 251 381 242 115 
46 151 67 39 38 46 11 472 459 
269 462 251 309 127 209 324 257 384 336 257 34 
92 250 152 271 222 336 61 123 
179 11 127 124 324 62 164 354 334 
269 346 453 309 127 62 117 401 
458 129 458 131 340 
458 175 439 29 317 
455 11 47 309 55 269 
455 47 309 349 269 414 
458 214 129 455 11 396 32 
458 462 337 309 205 
455 103 455 11 258 104 265 
257 297 270 462 229 
37 373 458 47 226 438 27 210 
38 46 11 127 41 
139 434 188 458 306 257 456 419 
257 170 495 309 68 
63 131 340 282 72 254 
46 4 71 300 475 269 
257 137 191 382 156 
63 24 453 309 257 136 
455 358 351 244 173 254 
455 296 460 92 38 455 47 62 429 309 305 
257 465 497 134 142 127 180 234 68 
62 215 285 497 134 127 142 180 56 257 359 326 
104 340 127 24 265 
257 164 109 175 134 36 257 407 
269 346 134 469 344 458 129 
92 191 271 367 68 475 341 133 
63 362 332 231 129 
269 382 456 34 
46 432 453 309 282 242 270 
458 88 324 257 384 336 257 260 
242 191 381 36 56 133 
347 269 191 340 234 173 92 346 62 357 429 269 202 340 47 226 378 
63 47 309 103 231 129 
257 302 497 134 127 142 180 234 68 
45 455 460 47 309 396 174 130 414 
455 47 340 17 103 
62 476 169 285 64 257 222 
231 131 134 65 
455 202 24 309 47 62 496 210 458 129 
426 224 462 309 305 375 
269 346 152 174 210 
269 462 251 309 456 62 115 
257 85 287 271 289 28 
439 29 54 375 151 460 256 182 
179 113 340 244 265 300 475 173 
132 455 113 340 188 265 
231 191 427 56 43 215 
62 476 109 285 353 309 68 
63 47 270 338 
63 11 273 408 485 
458 131 269 189 438 27 
215 47 134 209 257 330 346 153 
455 47 400 265 48 269 
92 284 340 127 72 160 
269 346 152 62 430 458 129 
63 483 63 151 453 309 472 265 
231 129 438 409 94 53 
283 303 133 131 134 142 65 62 60 371 68 
458 307 309 127 62 50 494 
455 96 473 309 127 264 
458 191 427 257 374 441 
455 483 458 175 474 309 319 415 383 275 458 129 
63 151 62 50 393 458 73 
257 170 175 495 309 417 205 
62 464 29 400 47 214 474 62 429 
144 438 417 458 88 1 
455 411 309 2 257 486 231 129 
455 131 340 104 265 324 
458 346 62 67 117 437 
80 22 251 309 121 189 265 181 
31 462 134 125 309 197 280 
63 202 47 152 92 381 189 
460 242 191 134 257 392 33 234 269 309 319 265 130 
269 191 33 309 51 
46 113 340 59 199 434 483 
269 191 33 309 319 309 480 
242 462 72 181 265 462 92 
257 465 287 271 28 
269 346 62 67 107 441 458 129 
62 370 299 129 
458 250 271 68 156 
63 193 309 104 269 
242 462 357 350 234 257 76 434 405 257 277 129 
265 346 96 257 224 
38 63 106 474 309 401 415 269 
46 47 309 127 92 89 257 384 
265 202 134 59 
257 277 346 90 250 271 68 189 257 407 
92 191 271 299 68 
265 462 240 269 284 127 
231 129 231 497 134 417 394 332 146 
138 133 353 309 68 
257 222 497 340 127 36 
458 431 340 47 309 458 129 
257 341 175 64 269 
231 64 231 250 62 401 
257 447 346 29 375 22 182 376 
179 151 134 343 
455 351 293 309 396 458 129 
257 141 497 340 127 142 180 234 68 
38 455 358 104 269 32 
335 269 191 280 309 101 
455 362 309 2 38 455 362 309 2 62 391 
63 351 293 428 159 
46 4 349 269 203 438 119 
269 346 199 455 251 231 129 
46 358 472 332 466 
428 103 458 346 291 
265 346 227 310 336 257 260 
335 92 4 127 271 165 
428 250 402 327 
455 483 46 4 349 269 
63 4 134 104 265 458 129 
257 465 175 134 322 62 298 
455 110 269 191 469 
455 131 29 275 
257 49 118 63 362 309 104 462 166 159 
269 11 127 62 117 117 51 231 129 
31 381 64 257 91 
455 202 24 30 303 458 129 
370 133 495 309 68 
434 151 111 309 205 
143 434 131 340 282 196 258 
63 356 62 496 130 
257 195 346 395 223 313 462 156 
257 299 202 134 408 438 153 
46 230 127 39 
1 175 64 257 482 
132 265 431 340 472 485 234 269 
231 495 309 408 394 332 28 
257 12 21 250 271 477 268 257 91 
92 47 152 45 139 
63 151 8 309 282 173 
269 346 62 260 63 47 309 305 458 129 
458 353 68 189 156 
269 346 474 423 309 104 415 286 
62 395 35 462 251 192 
215 129 377 434 22 427 
257 91 175 134 152 36 56 370 133 
347 179 314 184 455 11 2 458 129 
38 46 104 340 483 46 432 453 309 55 
269 462 84 33 309 82 189 
257 433 193 
257 247 7 360 62 407 415 155 
428 436 189 257 130 
269 462 62 165 265 11 288 127 92 
257 393 131 134 142 68 
56 248 49 150 4 104 265 
282 205 254 336 264 458 468 257 241 
257 341 175 64 143 482 
257 263 11 127 395 
269 346 310 336 257 401 
257 470 133 214 22 309 267 415 154 
455 282 309 314 174 466 
63 11 472 269 231 129 
14 346 453 309 258 286 
139 151 83 309 47 88 3 335 
458 191 340 453 309 420 286 203 
265 462 134 257 165 
63 351 282 309 35 32 
455 104 340 372 86 347 269 202 472 269 405 
423 462 453 189 
63 11 134 127 198 309 55 269 257 299 129 
455 188 434 4 59 
458 175 353 309 68 
458 180 257 425 364 383 492 381 
227 212 22 256 445 53 
480 346 470 169 64 68 189 257 222 
458 214 404 234 72 238 459 225 
257 164 109 129 269 202 314 8 
179 483 179 86 174 260 132 179 96 471 340 
92 346 288 257 374 260 
84 265 231 462 197 233 327 151 197 41 
257 29 159 22 
347 179 408 184 466 455 358 244 269 
185 22 491 
269 346 33 234 46 309 319 
458 129 458 202 127 254 336 257 338 
192 191 270 336 205 
63 202 47 436 347 63 124 
458 353 309 244 62 60 229 
242 284 340 127 458 129 
132 455 106 273 110 24 265 
133 287 271 289 146 
257 476 169 353 309 68 
455 483 231 346 453 309 305 257 277 129 
347 46 293 332 15 455 19 46 
480 4 460 160 257 295 
270 4 134 349 394 29 130 
265 191 185 105 18 
132 92 191 428 357 350 
455 113 340 59 199 455 24 458 204 
455 296 453 309 121 309 6 38 2 
215 202 104 269 234 223 458 129 
347 63 104 340 63 432 62 357 393 
269 346 134 62 61 443 
493 151 275 265 151 107 309 286 
335 458 404 257 215 
231 175 273 152 356 
455 131 340 47 394 327 234 257 456 185 492 
269 284 134 127 316 398 
455 47 423 412 257 400 
271 160 462 52 
92 346 152 271 59 
269 346 33 234 154 
455 104 340 483 63 104 
132 265 122 134 456 
92 346 423 455 4 104 268 269 84 
265 191 62 357 33 
257 241 131 134 
242 462 438 263 309 472 
89 257 384 336 257 441 455 296 352 
257 91 191 134 36 56 257 425 342 
63 432 460 92 
269 346 453 309 244 62 391 336 311 
265 202 127 50 231 129 
257 425 364 462 62 117 338 
455 497 340 187 269 280 
455 483 269 11 319 189 234 62 430 344 257 285 129 
132 269 346 62 50 378 309 127 
265 346 257 49 102 
257 370 341 96 131 62 391 336 311 
265 346 257 49 118 46 47 309 104 
479 129 439 120 22 163 
269 346 423 309 104 415 265 
233 90 36 257 247 415 257 304 
45 269 346 446 
265 4 134 127 357 
257 476 431 340 408 485 257 117 2 
132 265 462 340 257 130 336 257 352 178 
46 11 349 332 336 242 
269 358 127 62 357 396 
63 4 2 415 205 458 129 
92 230 127 62 425 393 458 129 
227 185 22 163 
242 462 257 33 336 174 210 
231 250 152 437 203 257 119 
63 151 214 62 310 336 201 29 346 416 458 129 
140 133 129 72 44 462 308 130 132 495 309 68 289 
458 351 129 458 462 453 309 2 32 89 428 369 
132 269 346 257 97 
455 104 340 362 309 86 
269 131 134 408 28 268 257 433 
139 47 152 163 
231 129 231 250 271 289 28 
335 179 388 144 201 29 
458 462 251 309 197 257 82 
455 96 483 455 4 282 226 254 89 394 33 
455 362 286 309 127 257 130 63 111 309 127 
269 122 47 152 257 459 
139 131 340 472 269 
92 47 152 428 327 
92 462 271 378 24 269 203 257 424 
257 21 202 134 142 68 
46 47 309 282 92 
269 284 340 47 152 62 165 
458 191 134 251 309 127 116 
13 101 462 243 
265 346 257 130 269 11 288 127 
257 215 22 404 38 257 377 22 427 
341 133 495 68 
170 133 497 134 142 127 180 234 68 
458 353 309 68 289 189 257 44 
179 4 349 46 132 46 113 340 349 205 
132 63 358 349 381 
132 265 497 59 
428 434 495 
271 496 343 175 152 128 3 53 
269 346 33 309 472 426 82 
458 462 220 189 265 
455 351 113 340 188 269 231 129 
370 133 202 134 68 189 257 181 
458 250 134 152 427 
257 162 230 127 200 56 257 384 336 257 115 
455 497 104 379 242 
455 460 47 309 2 
29 222 129 185 434 22 163 
458 287 271 28 38 133 495 309 68 
132 92 4 38 284 127 332 
179 353 309 408 28 
133 47 134 209 28 
271 409 175 152 413 
29 158 329 48 242 488 
455 47 309 314 189 453 458 129 192 
455 47 62 357 210 
62 215 285 353 309 68 
455 122 134 47 257 333 179 47 
455 296 134 453 309 197 245 
38 227 143 434 7 
92 462 460 62 489 130 309 319 458 129 
139 250 17 227 13 466 203 257 406 137 
458 462 257 451 336 257 141 309 127 427 
242 113 340 127 257 384 336 269 
347 458 431 340 2 458 358 81 
132 357 275 218 309 72 384 
271 270 250 152 427 
92 462 146 
92 471 340 127 394 65 234 184 458 73 
271 496 253 22 128 53 
383 375 381 179 382 254 257 413 
129 257 213 299 
45 455 104 340 362 309 55 
179 96 474 9 286 
63 432 453 309 244 173 189 
269 346 62 489 33 458 129 
455 356 174 338 
269 122 134 456 489 
46 4 214 349 269 
62 425 285 131 134 142 65 62 60 234 68 442 301 
241 351 408 485 
269 346 257 315 336 62 489 162 458 129 
62 295 191 251 53 
46 106 474 309 47 428 224 458 129 
242 11 127 438 40 315 336 257 115 
455 113 340 483 336 270 
240 251 233 153 191 340 404 
257 398 175 152 50 
132 231 474 428 336 205 
92 346 62 489 130 309 319 458 129 
179 49 86 257 456 464 492 
132 269 471 340 127 257 97 
92 11 127 72 44 
92 151 139 357 16 
63 351 293 309 319 2 62 260 
265 346 134 257 443 234 62 464 241 
132 92 202 340 127 62 374 33 
269 131 38 458 431 
455 104 340 47 269 344 
265 346 257 130 63 182 227 456 281 
265 191 340 310 336 257 411 
132 11 269 472 234 62 50 395 
46 474 309 362 269 
257 341 307 332 238 258 
266 241 131 257 97 
257 409 462 134 486 309 257 398 
92 462 271 29 130 455 497 104 269 
434 104 340 86 265 458 129 
1 11 134 86 199 462 453 189 203 257 425 364 
458 202 134 153 257 433 
179 22 227 195 231 129 
221 151 161 234 374 115 
132 265 373 127 351 257 315 
132 269 346 33 309 82 189 
92 191 271 367 146 189 257 102 336 257 491 
242 462 62 357 378 
439 241 22 214 427 
92 11 49 127 243 
455 47 152 318 271 237 146 
243 462 243 458 129 
269 287 271 332 28 
133 131 134 153 257 465 
269 462 134 99 347 143 383 375 11 127 316 485 
370 170 133 131 134 68 
38 242 35 191 340 
347 269 346 134 270 118 269 346 30 
38 269 471 340 127 257 456 
455 483 269 346 33 458 129 
265 346 310 336 199 63 104 
455 351 362 309 258 257 393 
133 131 340 177 69 159 202 127 316 398 
132 496 149 47 490 
271 91 175 152 209 
455 473 309 19 233 
269 346 257 291 33 309 319 197 458 129 
458 175 152 414 269 324 
179 250 271 29 28 
347 455 4 2 455 296 453 309 2 458 129 
269 175 361 257 401 
271 496 80 22 54 229 
179 358 273 282 269 475 257 81 
257 51 131 134 142 65 62 60 475 257 359 326 
62 154 285 131 134 65 62 60 371 68 
458 122 362 309 104 265 132 455 104 340 
269 191 291 144 257 243 434 250 466 
458 129 257 411 202 331 
63 202 24 46 309 47 30 429 309 258 254 257 338 
269 346 134 76 
132 46 460 47 309 311 415 201 29 
231 129 271 270 191 491 
257 470 399 129 
132 257 170 64 257 477 
132 269 131 340 384 92 
63 432 453 309 47 423 458 129 
455 483 269 11 127 62 50 260 
458 346 310 336 174 387 84 
458 436 332 23 377 492 18 
365 133 353 309 153 257 433 
265 175 152 36 458 468 87 
257 283 303 250 271 68 
257 91 462 251 309 127 209 53 
455 362 309 349 173 2 
26 269 415 434 
257 291 140 306 
257 299 129 458 175 271 29 28 
100 231 462 76 179 4 137 233 203 257 425 364 
277 403 10 175 270 
63 432 99 309 104 265 
455 483 63 151 402 203 242 130 
269 191 351 56 429 231 129 
458 346 413 234 210 
257 393 175 309 319 189 475 264 
132 269 191 340 257 384 336 233 327 
383 194 22 128 491 
257 21 131 134 142 68 
458 129 458 131 134 47 28 336 257 443 
143 434 47 423 458 129 
63 251 309 305 257 260 
455 483 269 346 58 231 129 
257 140 191 496 114 
63 113 340 59 275 485 458 129 
265 4 134 121 
458 462 257 451 309 319 189 409 
257 409 462 251 309 456 487 192 
60 269 89 257 29 384 
63 358 47 62 357 424 321 
92 191 271 367 68 475 257 425 342 
438 263 250 152 251 240 176 240 456 192 
458 17 203 257 395 456 115 
132 63 151 214 62 434 336 103 
241 209 381 
458 175 273 182 
257 465 129 269 11 160 
132 265 462 257 130 269 462 
241 22 163 
455 104 340 24 205 231 129 
257 425 364 175 271 237 313 
63 106 474 309 314 343 
257 419 462 54 234 171 
458 316 205 234 241 24 184 
458 287 271 28 336 257 407 
227 151 256 445 379 409 
242 462 199 455 104 458 129 
84 269 462 257 424 321 
455 103 63 4 349 332 336 265 203 257 416 231 129 
458 129 215 131 134 86 14 250 257 291 336 130 
438 393 175 257 126 496 312 
269 346 288 62 117 260 
455 4 319 172 415 174 211 167 
215 133 495 309 68 189 257 443 
63 497 75 205 254 336 101 
265 346 357 132 455 104 340 362 269 309 384 344 
265 191 134 257 443 
179 182 38 17 
92 191 271 367 68 475 31 268 257 343 
84 455 4 349 265 303 458 129 
132 133 47 129 269 346 62 357 348 
132 269 202 47 152 62 67 489 437 309 305 
199 346 257 369 336 265 
179 276 38 63 131 340 
455 104 340 483 455 11 456 257 115 231 129 
335 92 346 257 466 
269 191 257 451 237 407 203 266 418 
63 47 62 437 38 458 358 282 62 274 71 
426 120 11 408 286 19 458 129 
455 351 293 309 86 
269 175 495 289 68 
12 133 193 
455 110 455 497 340 305 405 
458 131 340 24 269 
242 284 127 361 
10 79 62 141 336 87 
455 104 340 483 46 358 349 62 59 203 35 458 129 
63 497 340 104 257 97 
179 22 50 458 129 
257 392 118 462 309 104 269 379 265 458 129 
455 19 173 231 129 
179 432 234 59 
455 106 273 249 237 434 324 
257 334 131 134 181 62 295 229 
455 86 257 243 175 152 271 357 234 184 458 129 
265 175 134 152 445 
179 362 257 178 309 319 203 62 446 130 
455 293 309 127 92 
63 104 134 47 309 396 
458 497 134 127 180 234 332 68 
455 362 309 104 199 346 291 
269 191 62 117 258 309 286 
455 296 273 453 309 282 242 429 32 
63 293 434 14 4 104 265 
455 351 131 340 483 92 191 62 33 37 378 309 104 269 
455 296 343 234 269 
179 351 362 466 
45 231 346 453 309 2 412 195 
257 195 151 460 308 44 
269 346 273 152 72 181 
257 75 4 134 349 345 487 62 395 459 247 
242 330 462 134 270 336 205 
46 471 340 24 269 
242 462 273 62 357 315 
143 151 426 434 
269 431 340 47 309 127 265 130 
269 381 191 73 
458 204 458 11 71 32 374 115 
246 400 22 491 456 115 
311 379 194 
49 383 434 22 427 
458 273 445 30 270 
265 346 134 257 443 264 
244 286 254 336 264 
63 432 264 309 59 257 140 
466 462 257 165 
265 462 62 67 167 65 458 73 
455 497 340 282 485 234 269 
257 141 131 134 142 68 
38 455 131 340 362 309 71 405 
269 11 127 438 60 
428 497 127 223 
171 191 340 394 446 
269 346 152 62 50 464 105 
92 151 67 464 434 265 104 340 362 269 458 129 
455 104 340 86 394 29 130 
179 22 251 309 25 31 381 242 34 
63 362 309 121 265 103 
179 273 348 309 459 
458 88 257 51 456 34 
132 63 474 414 269 
62 35 191 54 381 53 
63 306 227 426 375 
179 104 340 483 269 346 62 117 401 
30 462 354 
269 175 152 62 489 33 
257 12 21 250 271 367 68 301 
458 191 340 491 
455 86 199 388 189 257 451 33 
455 103 242 462 257 310 
92 191 271 477 209 144 257 407 
257 165 462 257 476 
257 476 169 495 309 68 189 257 222 
84 462 257 33 458 129 
257 141 381 64 269 
179 104 340 47 265 196 33 
455 483 265 346 72 181 
215 129 29 482 151 58 
458 191 340 257 49 270 
265 191 257 357 310 
257 465 497 134 142 127 180 234 289 68 
257 330 191 427 
265 346 13 101 
269 346 257 270 429 63 282 309 472 428 466 
458 131 134 153 257 433 
132 455 24 143 275 41 
455 131 340 362 242 234 257 341 
92 462 62 341 
455 191 62 380 336 227 185 
92 151 383 327 
132 63 113 340 320 265 
84 269 346 446 
455 468 233 309 319 203 257 303 
92 191 271 367 68 475 419 133 
458 129 257 383 202 267 32 156 
457 151 340 257 49 165 
395 159 22 251 156 
269 131 340 408 394 29 28 336 13 443 
257 330 175 64 257 482 
455 351 104 340 349 269 
62 263 191 251 176 374 115 
89 257 425 342 
455 483 63 4 104 269 
14 11 47 320 336 143 195 
242 462 257 130 269 284 127 
265 191 273 129 
84 179 47 428 258 189 257 130 
257 277 431 41 
147 462 134 309 177 269 346 227 327 
38 455 483 269 346 62 357 118 
30 435 399 191 491 
383 418 104 340 472 62 281 
231 250 271 289 68 309 472 
231 381 495 68 
455 351 473 309 244 174 33 
62 40 330 191 491 
269 306 40 378 
14 346 453 309 127 257 416 292 
458 131 134 142 65 62 60 
395 159 151 251 374 217 
269 346 357 309 349 286 197 189 136 
242 294 462 469 231 129 89 62 350 225 
257 277 175 134 316 438 263 231 468 62 350 225 
84 455 296 8 254 446 275 458 129 
455 296 134 453 309 55 487 455 282 265 458 129 
257 395 247 191 134 251 487 376 
269 191 251 309 121 414 156 
458 131 340 197 269 485 
269 462 257 49 130 
455 351 103 455 4 314 453 
92 191 271 138 68 
179 284 134 47 152 316 
242 122 127 257 456 429 309 104 265 
257 410 131 134 142 68 
455 293 309 349 62 409 
265 373 127 374 
458 353 309 68 289 189 257 443 
269 191 214 62 67 442 315 203 257 441 
257 465 131 340 197 280 189 265 181 
62 215 285 36 72 44 191 308 130 
201 393 175 185 195 189 257 334 
132 458 431 340 104 265 
269 191 134 58 
323 388 498 309 411 
455 471 340 127 242 115 
455 96 104 340 483 455 4 127 187 280 234 242 115 
84 11 127 271 446 
179 131 340 417 438 153 
271 80 22 54 
458 129 179 122 267 374 34 
3 335 92 175 152 270 165 144 30 
46 47 309 408 275 485 231 129 
63 131 62 391 336 357 
231 351 113 340 282 300 475 269 231 129 
31 129 247 191 67 337 
455 483 63 47 62 357 393 242 115 38 11 305 458 129 
309 184 269 346 227 107 
458 11 127 343 203 257 425 364 234 257 451 33 
132 63 47 271 333 
271 457 22 318 234 257 461 
257 434 293 269 
63 47 309 472 257 123 55 231 129 
257 21 36 257 207 
63 362 332 458 129 
271 263 191 251 242 217 
246 22 381 163 56 206 93 
257 302 175 353 309 68 189 257 443 
242 462 270 336 257 275 46 113 340 320 
455 293 309 305 309 314 242 168 453 458 129 
92 151 139 336 286 
257 211 175 134 152 356 
269 346 62 357 130 309 315 257 115 
242 462 340 453 300 
63 351 47 309 408 269 33 
104 199 46 188 
271 270 307 309 305 332 23 455 104 38 271 270 307 309 305 332 23 426 400 104 
455 113 340 47 265 
63 460 47 309 104 426 392 
265 346 227 46 4 104 
62 51 497 160 257 263 
354 38 476 
455 104 340 293 257 334 
435 482 497 218 374 
154 191 134 491 
257 277 131 134 68 257 399 129 
231 191 209 257 97 441 
257 370 4 160 257 263 
46 47 309 127 189 136 336 269 
458 79 257 241 
257 120 353 309 68 
458 230 47 99 
255 193 456 217 
257 443 462 340 251 309 319 309 409 234 30 115 
257 466 431 340 258 257 434 
50 315 309 257 115 458 129 
63 432 134 344 200 
265 191 252 492 18 
92 346 271 327 
458 64 257 482 
455 351 103 63 104 340 282 30 270 24 242 231 129 
458 495 309 68 189 394 336 257 491 
231 346 426 49 103 
269 202 127 50 458 129 
269 346 62 393 265 175 62 429 309 104 357 275 38 455 362 309 127 310 336 269 
271 345 191 226 56 257 70 
92 11 127 271 68 458 468 87 
179 11 362 309 319 197 
257 370 170 250 271 68 189 265 91 
428 275 244 33 231 129 
458 351 131 340 77 
257 138 230 134 197 280 154 129 
257 297 462 476 
458 250 271 367 68 189 171 346 207 
269 191 257 456 369 63 473 309 2 
458 316 271 398 68 
458 214 202 340 408 438 153 
242 462 426 387 
458 431 340 293 205 
38 63 11 273 104 265 
46 47 309 244 270 447 89 62 33 
62 295 462 251 176 374 217 
231 306 265 397 41 
72 21 477 191 251 192 
265 443 462 460 486 
455 483 179 151 453 309 127 257 97 
265 191 13 392 397 
46 284 258 257 387 
231 353 309 177 69 257 341 202 75 434 309 82 
271 270 191 491 203 192 346 207 
62 206 350 85 128 265 272 434 122 47 436 
257 451 409 191 117 350 
455 129 63 474 309 472 62 2 
265 346 438 263 
271 263 175 152 316 189 69 458 11 127 52 309 2 374 281 
458 131 340 362 309 408 438 153 
366 221 151 134 251 487 374 115 
458 129 458 202 134 6 32 
269 273 7 231 129 
46 284 340 319 197 
171 346 397 191 438 451 315 336 257 281 
265 401 108 414 190 242 34 
63 4 315 291 130 
257 395 191 54 234 171 
265 346 20 46 326 
53 346 35 203 
132 347 269 346 134 265 130 46 319 309 257 374 270 
63 104 340 362 309 104 269 
455 362 309 127 89 257 136 38 455 188 455 47 257 260 
455 47 62 50 210 
218 197 30 441 
132 257 158 219 462 134 
46 202 273 47 83 269 
63 131 340 349 265 
45 199 346 257 165 
265 346 210 458 129 
221 151 171 
242 462 62 496 393 84 458 129 
335 92 151 257 323 275 
269 346 134 453 309 127 257 97 458 129 
257 162 462 134 111 203 257 425 364 
179 483 13 33 175 218 
210 11 319 189 458 129 
132 269 471 340 127 227 311 
434 11 218 197 
143 222 11 134 127 316 398 
147 191 234 257 392 
455 296 62 473 330 458 129 
30 407 462 251 374 156 
455 47 62 323 141 92 415 184 458 129 
455 96 473 309 472 269 458 129 
458 161 309 6 32 
215 129 252 434 22 163 
257 341 175 209 271 29 146 
63 22 198 309 104 265 
257 25 191 251 309 456 414 301 
257 341 316 265 274 229 
179 22 209 405 
179 131 38 63 306 
179 47 62 39 476 
269 431 340 311 84 
257 380 364 362 269 
257 172 169 477 129 
212 29 120 214 22 491 
132 275 4 59 
132 179 86 92 462 62 489 130 309 319 
154 455 296 453 309 315 245 415 62 477 
271 395 263 175 152 322 
62 215 91 129 72 44 191 308 130 
423 462 161 
242 462 62 67 117 401 
31 361 257 60 
132 179 202 340 319 
179 284 127 198 309 104 332 
265 346 199 455 362 
46 47 309 472 62 263 
62 465 285 131 134 142 65 62 60 234 68 
257 29 462 309 311 
179 202 218 172 415 286 347 179 497 
179 22 427 257 97 441 
63 284 127 198 309 104 242 458 129 
132 92 191 62 165 
458 175 64 227 257 482 
265 191 340 58 
179 273 474 62 429 
458 73 265 458 251 205 309 121 265 130 
257 295 462 251 309 244 266 418 
383 317 22 228 257 491 
30 399 388 171 
132 458 129 466 191 340 257 126 107 118 
257 395 263 11 127 316 56 257 138 354 368 
133 209 271 28 
46 106 474 309 349 242 
405 231 175 205 
458 129 265 191 308 44 
365 133 497 134 127 180 234 68 189 171 
38 92 175 340 152 62 396 
257 91 462 251 374 217 
455 483 63 497 104 265 
269 191 24 62 51 
257 224 462 309 134 47 62 243 458 129 
455 296 62 330 346 330 458 129 
455 4 134 188 269 
179 47 257 466 
455 250 309 314 453 234 269 
176 159 22 251 189 171 
458 131 134 153 257 302 
132 269 191 134 274 69 257 407 183 378 
132 455 296 453 309 104 257 97 275 
458 129 265 191 134 257 443 
405 191 174 441 458 129 
185 29 434 214 22 491 
458 474 485 240 63 88 
231 214 129 265 458 131 349 205 
257 365 64 269 
63 104 340 86 257 130 
63 483 265 63 214 26 62 391 336 257 327 
63 188 265 19 284 127 92 458 129 
95 461 155 189 257 350 
257 162 11 244 418 
231 346 152 427 
14 11 127 257 241 
257 409 94 229 
257 185 22 427 456 217 
271 343 191 128 
269 191 273 415 46 
265 191 174 165 458 129 
63 432 92 84 458 73 
179 432 134 310 336 257 162 
455 296 453 309 293 227 257 258 455 4 282 10 129 
143 151 134 496 93 458 129 
257 222 214 47 340 152 36 
63 483 269 346 58 
269 346 33 309 384 242 
231 436 301 
257 425 364 462 107 
154 191 62 74 336 257 465 
458 129 458 250 340 
63 250 62 357 66 458 129 
458 460 175 265 103 
455 273 96 483 268 269 
257 409 462 251 309 456 234 266 418 
455 483 265 191 62 391 336 233 165 
144 220 254 53 269 490 438 263 462 340 395 
257 91 129 257 443 191 308 44 
46 113 340 55 173 
455 110 455 191 145 
63 104 340 47 242 466 344 
335 30 60 7 
458 191 128 309 127 203 357 102 
269 346 17 347 46 483 269 346 17 
269 346 447 270 458 129 
428 372 88 257 338 
92 151 327 
242 284 127 62 117 401 
46 86 46 362 309 349 269 
84 458 113 340 319 197 
92 462 271 248 405 
132 458 306 269 456 115 
63 104 340 38 63 131 340 
46 96 151 223 
270 462 62 165 336 354 
179 47 340 306 469 257 434 
179 47 134 356 205 
132 92 151 139 241 
455 362 309 305 415 205 
257 159 151 251 309 127 322 405 
255 193 456 34 
455 483 63 47 62 50 393 
455 293 227 257 258 455 4 282 
455 288 362 309 207 
347 257 97 434 35 189 269 455 104 340 483 92 346 196 103 458 129 
455 131 340 372 86 269 
46 49 293 270 458 129 
458 191 134 198 309 408 28 
265 462 13 224 
377 29 195 22 491 
497 179 104 332 
257 263 346 152 316 
63 11 127 220 415 205 
455 104 340 311 254 257 448 458 129 
455 47 271 68 189 265 291 84 257 81 129 
257 465 462 54 309 91 159 374 34 
38 269 431 340 55 92 
63 188 92 175 309 127 270 
271 65 77 191 128 
92 22 271 222 336 343 189 376 
231 250 464 29 28 
269 346 453 309 127 446 
383 215 22 491 
63 483 265 265 462 107 
257 44 462 251 309 244 485 309 62 217 
174 463 462 214 234 173 
458 436 185 492 381 
203 422 164 109 133 353 309 68 
335 455 483 269 346 41 442 
132 179 47 327 41 
347 63 47 269 63 11 48 269 
265 346 199 474 286 
458 129 458 131 340 47 394 289 28 
270 165 458 431 340 47 33 
179 131 134 267 173 
132 231 122 134 127 257 456 
63 104 340 362 309 349 242 384 
257 465 346 406 155 189 257 350 
231 436 62 464 105 381 
38 265 346 257 369 
455 188 72 247 11 127 180 203 62 464 105 
242 247 11 258 205 
458 214 131 340 305 
265 191 257 407 369 
242 462 13 437 
63 47 134 200 242 259 458 129 
257 243 462 469 458 129 
179 432 251 309 2 458 129 
257 170 131 134 142 68 
455 113 340 38 455 471 340 104 269 
347 46 282 275 453 46 4 96 82 291 485 92 
215 36 257 207 
132 265 497 127 62 162 
269 346 50 309 384 269 189 270 437 
269 346 41 196 231 129 
132 269 11 127 227 291 
257 285 495 309 127 386 56 153 
92 191 423 455 497 104 458 129 
257 224 7 412 257 71 336 2 
84 462 134 257 33 
395 159 151 251 381 242 217 
38 257 341 460 175 196 311 309 104 
234 184 265 191 62 165 
84 269 346 426 33 
179 79 234 354 
269 191 340 62 294 458 129 
455 191 273 198 309 472 265 60 
257 112 462 251 309 331 271 332 23 212 312 
458 11 127 343 203 257 425 364 234 49 257 40 33 
423 175 490 487 84 100 257 44 462 134 200 458 129 
84 455 86 257 130 458 129 
63 47 62 391 336 103 
265 131 134 59 415 53 346 419 
455 104 340 362 309 282 491 
434 104 340 86 174 260 458 129 
234 257 186 269 462 274 
265 346 134 257 49 165 
38 257 407 131 265 
227 46 432 256 79 309 104 462 188 173 
257 260 11 127 182 229 
185 434 151 128 309 47 152 163 
269 351 131 340 218 405 
104 46 483 179 11 104 300 415 265 
151 54 309 417 13 159 
335 32 269 346 176 
132 269 346 62 393 260 
458 388 280 132 356 49 383 336 205 
246 7 189 257 333 2 
84 455 296 486 309 242 
455 460 47 309 104 257 311 
134 227 47 152 427 
455 483 269 346 265 357 
334 133 497 134 127 180 234 68 189 376 
269 462 234 242 396 
63 187 485 415 269 458 129 
265 346 257 49 118 455 4 483 336 
390 131 134 142 417 257 330 346 153 
269 287 271 29 28 336 257 411 
257 466 131 340 456 489 
63 432 220 189 269 
257 383 497 134 142 127 180 234 68 
221 151 54 234 301 
57 455 131 340 408 485 
383 363 105 22 17 265 115 
269 462 134 99 203 257 424 
132 265 191 340 288 257 443 
62 470 169 299 129 257 407 191 54 234 376 
458 284 47 250 62 429 
269 346 62 323 446 401 
45 265 346 257 130 63 47 309 127 
92 191 271 293 309 104 45 
455 104 340 24 242 153 
246 22 361 
179 104 340 24 184 
265 346 199 179 177 
132 257 260 191 134 469 
84 92 151 439 
179 131 340 417 28 
242 259 462 351 240 107 458 129 
257 451 306 233 160 
269 346 257 374 447 
92 346 271 130 63 284 2 
257 80 22 54 309 384 156 
215 497 134 142 127 180 234 68 376 
455 131 340 483 269 202 244 242 489 
132 179 358 127 197 
458 468 87 301 
179 351 373 134 362 205 
455 296 134 8 309 2 375 458 129 
269 346 134 453 309 127 469 203 62 441 
458 129 257 35 497 218 240 176 240 374 229 
132 458 204 458 358 326 189 
455 187 493 434 203 378 
455 104 340 86 14 11 127 374 
46 351 113 340 55 269 
395 159 22 340 251 324 229 
275 47 474 309 59 
219 133 131 134 68 
265 263 11 127 316 229 
63 19 201 29 
92 462 271 123 
257 222 287 271 28 
38 497 134 127 180 234 68 
38 458 431 340 362 243 
458 191 214 54 309 25 31 
179 129 179 22 17 
455 473 309 258 434 231 129 
84 269 346 13 263 
257 477 129 289 123 191 58 
133 64 257 91 
257 283 303 250 271 68 192 
265 471 340 59 
455 47 62 391 336 33 
63 106 182 412 201 29 3 335 458 468 87 
341 133 495 309 68 
241 250 271 387 
242 462 199 455 362 
269 250 271 29 28 
269 462 72 449 263 458 129 
264 63 47 423 
455 250 318 485 458 129 
38 455 188 179 11 
335 179 151 189 13 27 
487 335 63 11 472 271 289 68 
132 458 353 309 408 28 
132 269 490 271 297 35 202 127 226 156 
257 429 309 472 117 466 
63 47 309 2 426 260 
455 106 152 198 309 408 242 332 210 
456 115 265 108 309 272 
269 191 62 50 33 
63 293 257 238 15 309 314 257 459 458 129 
257 206 393 7 309 25 
132 265 284 340 55 286 475 8 
179 151 54 309 267 32 374 34 
84 269 462 446 
257 70 175 257 395 177 
30 166 191 161 156 
257 213 403 214 202 
132 455 104 340 483 179 11 319 349 269 
257 392 118 309 104 462 309 104 269 438 27 130 
257 350 85 129 29 146 202 127 209 381 
38 265 346 199 455 131 
455 104 340 483 179 4 
458 471 340 6 234 62 297 270 
458 431 340 362 184 89 227 
92 191 271 367 68 56 257 170 
265 401 108 414 
269 462 174 297 172 
458 131 134 25 415 394 387 312 
92 151 41 139 458 129 
63 230 218 349 233 
455 358 6 309 104 174 310 
92 284 49 127 459 84 458 204 
92 462 323 19 234 62 243 415 479 
62 341 285 64 265 62 263 250 152 180 
132 172 191 423 24 458 88 269 
63 86 265 269 346 453 309 218 197 458 129 
455 110 269 191 453 309 127 62 96 50 441 
455 288 483 336 173 451 
45 131 257 425 364 38 480 
269 11 121 458 129 
455 104 340 86 199 346 453 189 
179 104 62 50 259 458 129 
438 409 462 251 309 315 229 
242 259 462 41 117 234 394 270 141 
458 175 129 458 111 269 309 71 438 295 51 
215 353 309 417 289 28 
458 191 24 62 494 
458 462 84 256 445 203 257 366 215 302 
257 407 7 245 
264 455 47 423 
242 443 284 84 127 382 
63 151 220 189 269 458 468 87 
270 437 462 423 231 129 
458 64 222 179 250 152 427 
271 458 129 89 62 350 225 
458 131 340 282 269 231 129 
63 351 104 340 86 62 370 299 129 
92 462 271 223 326 264 
63 11 134 160 
265 346 357 350 458 129 
335 63 11 349 458 129 
242 462 134 58 
455 131 340 86 265 
257 159 22 322 53 
460 458 204 458 373 134 65 234 30 281 
458 462 107 309 286 
89 456 269 373 127 257 384 
455 104 340 282 9 265 
179 202 408 271 28 
269 284 127 351 257 315 
387 312 497 134 142 127 180 234 68 
269 131 134 68 189 257 48 336 120 
63 104 340 86 493 434 
63 362 309 282 30 270 
458 202 134 417 394 28 
269 346 72 449 181 458 129 
215 495 68 189 257 91 
179 86 179 104 340 47 394 416 458 129 
455 47 309 311 189 265 458 129 
458 200 415 272 448 
246 22 163 56 354 93 242 115 
257 393 322 301 265 458 202 127 254 234 383 418 
458 175 271 317 
179 497 340 104 265 
144 62 430 455 351 497 340 244 269 458 129 
179 104 340 24 434 24 184 458 73 
231 436 189 171 
179 106 474 62 391 336 357 400 
84 455 296 257 49 270 203 257 424 458 204 
84 179 106 474 269 
132 458 462 189 438 456 429 
458 346 8 309 104 257 291 118 
415 286 257 165 462 434 
62 35 462 251 156 
179 4 267 205 
455 4 349 269 203 257 395 
46 273 177 273 
227 400 284 47 237 327 
370 133 497 134 142 127 180 234 68 
269 346 33 309 55 269 458 129 
347 46 244 62 437 46 244 62 437 
458 346 111 205 412 438 27 434 
265 346 134 174 259 
455 24 199 346 453 189 
227 185 64 257 482 
332 159 22 251 176 229 
347 46 113 340 2 269 46 113 340 2 
246 329 47 15 203 257 338 
458 284 127 52 309 166 485 
179 250 423 309 187 203 205 
38 439 332 492 
126 434 151 340 
14 346 453 309 27 269 
92 11 127 271 65 458 129 
455 4 351 166 485 38 104 269 
92 346 30 413 309 319 
335 32 458 373 134 
302 133 495 68 
455 362 309 127 92 234 173 231 129 
455 471 340 408 269 309 173 
483 336 269 231 129 
38 63 22 340 270 336 205 
455 483 63 316 257 291 263 
269 191 340 38 455 131 340 
455 47 306 428 38 458 175 306 428 
455 96 473 309 319 
302 133 353 309 68 189 257 91 
242 462 257 136 336 257 136 
257 247 191 180 53 
63 11 396 46 475 92 
257 397 191 335 469 
269 175 344 309 315 
438 278 151 134 496 
269 175 309 127 124 254 451 
269 175 152 163 
63 106 460 474 257 400 
455 47 152 254 336 62 259 360 257 456 439 418 
62 350 225 191 54 
179 214 182 203 257 424 321 203 257 425 364 
231 131 134 408 394 332 28 
92 346 62 263 
458 346 310 336 426 210 
12 341 133 495 309 68 
269 431 311 458 129 
257 91 175 134 152 36 56 257 387 
63 432 453 309 396 205 
179 104 340 293 269 
63 460 47 62 429 
271 215 22 491 
423 191 145 38 271 270 191 491 
185 47 152 163 
179 183 257 260 469 38 179 306 269 
269 346 237 62 117 118 
63 131 62 357 259 189 476 458 129 
455 104 340 483 269 346 67 125 
455 250 309 71 415 257 195 
246 110 257 294 191 469 
455 483 455 11 127 197 
43 133 47 361 257 411 
192 451 447 
62 470 169 285 64 257 222 
269 346 24 62 140 458 129 
231 191 427 229 
455 483 242 462 62 50 325 458 129 
257 465 287 271 28 336 257 44 
231 202 134 408 332 28 
257 395 263 202 127 61 458 129 
72 160 191 251 
347 434 104 340 24 269 179 104 340 24 269 
257 159 22 209 301 
265 346 257 49 130 46 4 55 269 
335 275 59 
234 428 269 346 41 442 
63 362 309 472 62 401 
455 273 349 205 24 265 
63 316 62 357 315 336 265 405 
269 191 134 274 20 257 44 94 
179 432 227 117 458 129 
132 179 214 177 242 175 134 152 36 
63 351 151 199 63 151 
455 362 46 309 188 203 184 32 
455 86 63 47 62 391 336 357 400 
269 346 152 62 489 115 
265 346 423 309 286 
202 340 46 86 269 
465 133 497 134 127 180 234 68 229 
63 432 240 357 240 179 151 38 179 432 240 357 240 63 151 
458 129 62 477 202 127 209 
455 358 351 47 309 282 111 309 269 
269 191 134 99 347 179 22 163 
242 462 438 395 172 260 
257 425 364 204 269 131 340 
269 346 453 309 127 265 337 
179 306 13 451 377 375 
92 462 271 101 264 
265 191 174 451 33 231 129 
269 373 372 311 234 286 
46 104 340 483 268 265 
132 269 460 191 340 257 384 
455 296 453 415 269 
156 346 263 462 395 
257 341 284 349 309 242 
458 346 474 237 62 117 260 
63 47 62 50 81 
458 4 355 62 494 
332 258 122 127 189 95 130 475 422 
185 241 22 491 
455 362 257 424 309 70 286 475 242 393 
480 497 48 257 258 
458 306 257 451 377 375 336 257 397 38 257 456 439 
144 257 407 458 353 68 189 257 80 
63 293 242 203 257 341 458 129 
455 104 340 362 309 319 172 144 185 375 
455 104 340 483 458 358 127 254 489 
269 346 41 176 309 177 458 129 
179 22 209 257 97 441 
265 313 214 175 218 308 77 
255 462 62 117 378 231 204 
383 16 22 228 493 209 
455 358 104 174 392 458 129 
179 11 293 309 218 32 
179 432 453 309 47 309 71 184 245 458 204 
92 346 152 72 247 268 265 
63 47 62 357 393 
242 462 174 172 164 
335 458 204 63 17 
269 346 72 76 181 
257 44 191 251 309 244 428 33 
269 131 134 91 28 
132 257 215 64 265 
269 191 62 357 451 441 
455 296 220 234 257 416 
62 350 225 191 54 144 257 80 
269 11 127 62 67 337 35 
265 346 460 58 
63 188 63 4 305 
423 462 332 107 23 265 
219 133 497 134 127 180 234 68 
455 131 134 483 455 497 305 269 
269 191 41 442 56 335 458 129 
62 263 462 251 242 34 
63 106 306 257 243 458 129 
227 151 312 336 257 341 
265 346 234 257 400 
269 497 127 266 418 324 62 263 462 180 
455 104 340 483 265 346 257 384 336 257 243 
63 151 137 292 
480 346 470 169 495 309 68 189 257 222 
271 263 462 251 324 442 374 115 
269 191 209 456 115 
434 151 220 
458 129 493 28 202 127 322 53 
132 179 47 62 96 357 476 
92 191 271 367 68 56 257 410 
13 42 191 134 318 
62 465 285 131 134 142 65 62 60 371 68 
257 467 341 175 361 257 91 
335 231 491 233 197 
257 443 462 189 160 
231 175 79 265 271 29 146 127 209 
179 129 179 103 309 486 269 309 257 398 176 374 115 
30 330 462 54 234 409 
203 265 443 179 202 127 163 
455 497 47 17 265 451 413 
45 269 346 62 117 260 
14 462 257 354 368 
45 434 104 340 82 
426 260 462 41 238 240 269 462 
63 351 47 309 396 414 269 
132 458 175 273 152 62 211 81 
347 455 104 340 455 104 340 
132 265 11 288 127 92 
455 104 340 293 62 42 458 129 
132 202 340 46 86 
138 133 497 134 127 180 234 289 68 192 
269 346 45 107 
257 399 79 234 72 44 
257 334 131 134 68 189 95 263 
269 431 340 258 458 129 
257 236 115 175 152 62 33 336 59 
179 131 134 408 394 28 
257 21 131 134 142 68 189 257 295 
455 104 340 47 257 333 231 129 
63 432 62 215 109 
63 106 182 412 201 29 3 335 458 129 
383 434 47 152 437 309 450 
455 131 340 362 309 401 415 269 458 129 
426 354 93 151 189 136 336 257 325 458 129 
234 286 269 191 62 117 401 
242 33 179 151 134 453 309 55 
132 11 231 319 197 
63 7 309 282 185 448 458 468 87 
215 129 266 22 491 
265 346 310 336 426 259 
270 141 191 88 254 171 
257 370 170 131 134 142 68 189 257 207 
428 177 458 250 79 234 41 196 466 
242 462 95 384 38 455 11 127 92 
139 368 312 22 51 312 
265 191 62 117 165 
265 462 351 174 164 336 210 
455 483 46 284 86 265 
265 462 257 130 63 151 
63 432 96 453 
179 11 218 415 184 
257 383 22 427 192 
458 214 353 309 408 394 29 28 
38 242 462 134 257 352 130 
257 443 191 187 469 487 301 
458 129 271 120 22 145 
458 129 257 443 462 460 308 44 
269 191 62 50 294 
458 495 29 68 
270 330 191 427 
458 191 134 251 309 65 309 257 260 
46 47 309 197 173 485 
271 345 191 226 189 438 443 
242 462 257 441 336 257 434 
271 410 22 249 
45 199 346 496 264 
63 362 332 466 
104 46 362 309 282 9 29 275 
269 131 340 408 29 28 
227 439 64 257 482 
455 104 340 483 63 11 
63 106 474 62 429 309 305 269 227 
458 131 340 68 289 
265 458 202 340 177 
63 11 48 75 203 143 221 
271 28 268 265 443 47 152 316 398 
458 131 134 153 394 329 
455 113 340 188 269 
231 287 271 350 225 
257 407 191 468 265 
257 126 107 118 462 265 63 306 257 260 
133 497 134 127 142 180 234 68 
455 250 62 50 33 458 129 
14 202 340 362 309 305 265 
242 431 134 104 242 89 227 
179 273 474 309 349 257 399 
458 346 134 453 309 408 203 
257 466 11 127 50 132 265 346 134 257 49 118 
132 133 129 179 251 402 327 301 
179 468 184 309 314 453 458 129 
57 241 362 59 
269 497 127 438 115 
257 29 383 131 134 142 68 189 257 263 
269 497 127 442 132 265 346 426 224 
458 372 276 62 224 
458 214 431 340 362 309 127 427 
455 104 134 86 291 84 
132 257 12 21 64 242 
271 354 327 22 128 
341 133 250 271 367 68 189 257 222 
271 29 28 22 322 
169 133 497 134 127 180 234 68 
185 375 22 182 192 
46 4 188 269 
269 346 152 439 492 
455 250 423 309 104 415 265 
265 191 62 117 117 310 336 269 
269 175 288 152 242 130 
269 191 214 13 456 
84 265 462 134 257 443 
46 104 340 47 309 408 269 485 
269 346 214 357 101 
132 455 314 189 343 
63 131 340 47 466 
46 106 474 62 117 263 458 129 
46 151 257 292 336 257 416 
92 346 270 289 165 
43 215 202 134 68 
84 269 346 41 442 
271 270 175 152 116 344 
455 351 124 309 104 174 392 
215 64 179 250 111 75 
455 131 340 483 455 497 305 242 397 458 129 
458 497 472 466 
458 346 357 458 129 
242 462 174 338 
46 113 340 104 242 
132 458 191 351 41 357 
458 335 88 234 31 
63 293 309 127 337 309 257 434 
45 199 346 257 357 350 
458 129 458 131 340 411 309 267 415 394 336 257 377 
84 63 432 8 309 472 485 234 269 
455 96 83 63 497 472 269 458 129 
269 191 351 101 
63 11 104 269 32 
332 23 62 391 336 195 46 4 188 269 
179 432 174 297 387 
462 92 394 29 130 
179 362 46 309 258 205 
246 275 89 257 97 33 104 134 311 
132 242 175 134 288 152 257 443 
455 483 242 11 127 257 456 407 458 129 
242 462 453 309 127 62 489 157 
257 299 202 134 68 289 
26 457 214 108 
265 462 174 165 
269 346 62 50 33 
269 346 117 101 
63 131 340 96 362 309 59 269 
269 346 227 310 336 257 97 396 
458 495 309 68 189 257 482 
154 133 47 134 36 257 91 
63 358 244 62 369 405 
269 346 257 49 130 455 497 258 254 
269 191 96 107 309 282 245 309 62 357 315 231 129 
38 242 462 340 62 454 488 
132 265 346 351 257 130 269 462 
458 191 142 427 38 116 
242 462 134 62 33 234 51 
62 263 191 251 381 242 217 
269 131 134 408 394 289 28 
257 409 462 251 309 456 487 374 217 
455 7 309 25 242 115 
63 151 257 51 336 103 
132 242 462 134 62 61 263 
269 462 62 138 181 
455 124 309 396 309 257 384 
484 175 271 15 92 
132 63 47 316 265 263 
372 144 62 305 46 113 340 472 62 263 
132 269 191 340 220 254 
335 179 432 251 309 420 173 
455 362 309 472 242 174 172 
458 73 265 377 241 22 491 
63 396 240 62 393 
92 22 271 176 222 336 123 
132 269 431 340 59 257 236 38 269 431 340 59 257 416 
455 351 362 270 2 
46 106 474 309 55 269 
257 341 175 214 495 309 311 415 173 
62 395 263 462 251 374 217 
132 265 270 369 131 340 59 257 397 
269 346 453 309 127 50 
216 215 497 134 127 180 
257 82 131 134 311 
438 409 462 251 309 456 234 418 
458 497 340 483 336 270 
257 401 250 152 251 
132 63 11 244 269 
227 336 286 47 193 458 129 
242 393 175 265 
455 131 340 362 309 349 205 
259 354 214 462 72 181 
179 432 460 310 336 426 387 
455 177 179 432 62 357 393 
458 131 134 408 394 29 28 
92 346 288 62 446 130 309 2 
269 191 322 301 
257 260 462 273 469 
257 295 7 144 257 406 137 346 337 229 
257 43 399 129 
479 64 265 53 
92 191 271 367 299 68 475 370 390 
231 79 184 347 455 110 242 191 257 291 118 309 104 
265 346 199 269 191 
269 11 288 127 92 
38 63 104 340 47 265 
179 432 134 453 189 309 50 275 
257 354 368 462 214 251 309 267 301 
269 250 152 24 174 172 
38 265 202 244 62 489 33 
455 131 340 47 309 458 129 
269 462 96 62 137 
132 455 104 340 483 269 462 
231 351 250 309 166 485 
383 12 120 22 163 
269 346 50 309 26 269 415 205 
63 47 309 82 189 
347 455 104 340 455 124 
257 365 278 309 160 
341 133 188 179 4 59 265 
455 202 24 309 188 269 458 129 
455 362 309 319 172 309 174 434 458 129 
132 271 15 250 88 
455 483 265 346 257 107 118 
92 191 271 367 68 475 257 365 
458 88 257 260 38 191 226 309 62 302 
271 35 250 152 54 
458 129 265 263 202 127 316 374 115 
38 63 358 472 265 443 
63 104 340 311 458 129 
46 47 309 47 269 
179 358 104 13 392 
92 462 270 165 
271 289 28 22 251 324 156 
269 191 252 492 18 
28 151 309 127 322 229 
370 133 250 271 367 146 
132 269 346 62 101 
92 191 271 165 415 265 
456 115 346 260 191 445 144 257 281 
458 131 134 47 289 28 
63 151 343 412 62 488 
269 346 152 62 50 115 458 129 
46 47 309 319 414 265 281 
257 195 22 209 
458 202 273 104 265 
63 104 340 362 309 320 434 14 104 134 362 286 309 320 205 
269 287 271 29 28 336 257 407 
269 346 134 453 300 
257 368 495 
347 265 346 134 257 443 92 11 127 62 297 447 
455 131 340 483 455 191 453 309 305 269 32 
257 263 462 251 374 34 
156 346 263 462 134 395 
455 106 250 62 50 33 458 129 
283 191 226 309 62 140 302 
269 346 33 309 59 
332 80 22 54 301 
62 496 447 191 54 234 381 242 34 
132 257 141 346 292 129 179 250 423 309 104 415 257 454 
265 462 257 341 346 263 
179 22 309 267 32 156 
129 257 285 
92 175 152 271 59 458 129 
269 175 344 309 408 28 336 257 411 
38 455 47 340 356 269 344 
132 458 307 309 2 
62 395 263 462 251 203 185 418 
257 330 191 437 203 257 211 
257 195 353 309 326 482 412 201 29 
455 47 367 327 458 129 
215 129 92 22 271 222 336 123 
269 358 127 62 357 260 
458 346 453 309 293 227 257 19 458 4 282 
179 151 257 400 234 257 416 
192 346 207 191 257 451 336 257 115 
265 191 438 369 336 271 65 
63 47 309 127 189 136 336 426 260 
335 458 131 269 32 
275 59 458 129 
63 362 309 282 254 
132 265 346 351 310 336 257 165 
458 473 309 2 132 458 497 340 71 
257 70 131 134 65 62 60 371 68 
286 63 47 423 458 129 
242 462 426 456 429 234 459 
132 63 113 340 59 269 
92 346 271 378 24 269 
179 362 428 345 
455 473 309 305 269 
179 47 257 466 38 179 358 305 231 129 
458 346 316 62 117 270 324 
458 497 340 188 269 
269 175 340 152 111 
63 161 234 242 224 
269 191 62 67 357 115 
270 299 191 163 38 383 241 22 491 
272 434 47 436 
179 177 179 351 362 309 274 438 153 
271 231 131 340 305 257 294 
231 250 383 397 448 
92 346 439 105 458 129 
455 47 257 291 309 127 264 
199 191 257 392 118 268 269 
63 113 340 104 265 458 73 
455 104 340 483 458 473 309 349 184 
455 483 231 191 50 
179 287 464 29 28 
46 474 257 451 270 
455 106 273 249 237 62 118 203 174 210 
390 131 340 349 269 38 131 340 86 69 309 188 269 20 468 
46 483 46 106 474 205 132 46 106 474 309 282 265 456 369 
242 191 270 336 233 357 105 
231 73 269 346 351 62 166 
143 275 151 340 434 458 129 
179 11 349 13 384 92 
62 496 409 462 251 381 242 115 
269 191 306 469 212 418 
458 129 269 462 460 107 405 
265 191 361 56 257 70 
257 159 22 128 442 53 
63 202 127 62 446 338 
159 151 134 251 487 229 
126 22 209 53 
63 351 362 459 458 129 
246 329 193 
423 11 59 231 129 
455 187 174 466 189 484 458 129 
265 346 270 336 205 
179 131 340 408 29 28 
269 462 134 310 336 257 165 
132 63 293 309 86 257 130 
455 296 8 309 104 174 259 
62 35 191 251 242 217 
179 22 291 92 
451 419 159 22 251 229 
269 346 62 67 452 59 458 468 257 359 326 
133 202 134 417 289 28 
257 80 331 444 208 257 425 364 480 38 1 
455 104 340 483 269 346 453 309 127 62 165 84 231 129 
455 362 309 127 257 459 277 
63 106 152 220 189 265 405 
179 47 377 317 
179 411 309 160 
265 346 134 257 181 264 
63 188 63 47 62 50 429 
455 103 231 346 351 203 62 302 
455 106 249 173 2 
455 104 340 483 269 4 258 173 154 129 
84 462 257 33 309 311 
257 109 353 309 68 289 
257 22 251 309 160 257 263 
45 458 316 62 477 
257 375 384 376 
144 227 269 346 152 139 492 3 16 47 250 257 35 
132 265 346 134 395 
460 241 362 481 221 
265 202 127 62 172 71 458 129 
227 185 276 456 217 
455 202 24 309 305 132 455 351 362 309 104 174 392 
458 473 309 320 438 416 231 129 
63 284 315 84 
455 296 453 309 314 220 189 205 
266 434 22 491 
269 346 152 271 165 458 129 
92 191 271 343 
38 63 47 134 152 79 309 104 242 
257 456 383 151 16 
132 46 151 379 333 
265 202 134 104 89 227 
266 215 22 128 491 
265 346 257 411 38 455 483 455 4 104 265 
455 106 288 110 269 202 127 62 67 357 396 
269 191 271 117 401 
46 351 47 309 82 189 
265 346 257 392 310 
231 346 453 309 2 332 
269 346 257 392 63 497 104 
458 462 460 189 409 
428 478 193 
451 458 490 203 
92 191 271 367 68 475 257 164 109 
458 129 458 11 160 
132 271 263 191 251 324 374 217 
132 458 182 62 357 395 
63 104 340 293 265 
63 11 104 269 32 374 115 
455 351 362 174 466 
347 63 319 309 257 425 364 63 11 127 223 309 218 197 458 129 
195 151 288 351 24 265 
63 432 453 309 293 33 
455 362 309 127 189 136 
458 191 427 190 242 34 
132 269 191 340 379 62 396 
56 335 269 191 41 442 
458 495 309 153 269 
46 113 340 2 265 130 
46 4 48 269 203 257 416 
455 47 340 17 265 
257 368 191 407 309 35 
179 131 340 282 394 
179 47 62 210 41 
132 92 11 127 30 33 234 242 
133 495 309 408 289 28 
257 425 364 38 257 158 219 235 47 62 402 247 
132 265 191 377 492 18 
179 22 209 257 374 441 
231 288 83 203 184 
269 191 423 24 265 
455 110 242 191 453 309 127 174 441 
132 179 445 184 234 242 489 33 
269 346 41 442 234 265 257 299 129 
455 131 340 188 265 458 204 
257 215 285 497 134 127 180 234 68 
231 191 209 301 
269 346 196 446 
455 104 340 96 24 269 132 84 455 47 62 424 168 
269 41 287 271 29 28 
56 257 384 336 257 217 265 497 59 
132 458 287 203 144 62 441 
179 47 383 317 
257 409 250 152 251 309 456 414 257 384 336 257 217 
84 179 373 47 
458 351 131 340 362 309 104 227 493 275 
335 92 22 216 221 
458 11 273 59 
132 269 202 47 309 127 227 257 400 
455 104 340 362 309 349 269 
257 302 287 271 289 28 
132 63 432 134 8 309 305 62 243 
271 29 28 22 99 
84 455 86 455 230 65 
257 341 131 134 68 189 257 443 
134 344 257 285 129 
63 432 453 309 282 205 458 129 
242 462 426 393 291 84 
257 465 129 458 436 171 
455 113 340 282 254 336 269 
231 191 38 460 462 270 336 257 392 
269 131 134 153 257 29 185 312 
438 153 462 415 286 
242 462 426 263 
92 191 271 60 189 257 2 
269 202 340 127 257 451 33 
269 131 340 59 227 441 
257 476 169 250 271 367 68 156 
269 346 62 496 61 75 
470 169 133 495 309 68 189 257 91 
464 434 110 269 202 55 92 
455 296 134 257 49 270 265 131 242 458 73 
63 432 134 372 337 
185 29 76 16 214 17 
92 191 271 128 123 229 
405 191 62 260 63 250 309 305 
179 351 287 269 309 184 
341 133 129 269 191 41 176 309 68 189 257 91 
63 113 340 349 265 269 202 319 197 
455 11 244 257 259 
45 347 269 431 265 202 127 67 357 
63 358 6 32 374 115 
455 473 309 127 92 32 
257 401 191 273 382 
215 129 179 427 377 434 
455 103 434 218 309 349 184 458 129 
241 47 152 209 
179 47 62 366 368 
458 191 261 300 56 354 
425 353 68 189 257 91 
57 269 191 134 251 309 127 234 489 
132 428 177 275 122 273 127 257 97 
269 462 251 309 456 234 418 
242 191 340 270 336 493 105 
455 497 273 282 205 89 227 
63 47 340 227 115 
434 113 340 188 265 455 296 220 254 264 231 204 
377 195 22 163 38 185 22 491 
95 461 155 405 
179 293 309 104 332 458 129 
215 353 309 68 189 257 91 
269 284 340 127 237 62 117 401 
63 6 309 104 426 392 227 257 33 
242 462 257 393 63 47 
257 215 373 218 
31 175 62 357 429 
269 191 340 220 
455 273 110 265 269 202 127 24 242 231 129 
479 462 62 165 234 95 27 434 458 129 
257 294 462 134 469 
62 401 11 127 322 381 242 34 
257 12 21 131 134 142 68 189 257 91 
231 250 271 289 146 
242 462 72 367 165 
455 351 131 340 47 269 458 129 
84 179 218 309 104 101 
269 346 134 62 165 231 129 
269 346 288 453 309 258 458 129 
63 47 309 166 242 309 434 
132 458 250 340 145 62 172 71 
242 419 175 423 309 104 415 286 
344 438 398 160 175 134 226 62 145 
265 407 462 413 234 376 
269 462 251 309 244 383 492 
350 222 129 458 250 152 437 203 257 211 
455 202 340 362 309 187 205 414 265 458 129 
458 381 129 265 257 450 191 134 36 
271 317 22 491 
272 434 22 491 
484 462 62 357 393 
132 458 175 438 291 309 160 
257 185 22 427 171 
154 122 127 41 39 
460 458 306 257 294 
199 191 257 48 336 227 242 
214 179 473 309 166 179 497 104 269 
335 179 388 254 38 131 269 
92 191 271 429 234 459 
458 436 89 62 302 
212 12 120 38 270 43 22 163 
132 257 277 73 
275 22 357 335 458 129 
46 351 47 309 121 231 129 
215 495 309 142 68 189 257 222 
63 293 309 47 62 277 
455 104 340 362 309 47 265 189 184 
179 287 286 62 429 
269 131 134 153 257 241 
179 104 340 218 264 
455 103 309 349 46 374 171 
231 175 271 317 
257 186 470 169 175 495 309 267 415 257 410 
269 191 96 107 309 286 
63 11 104 240 179 177 
390 202 134 
57 265 497 59 
455 214 26 242 463 
265 346 30 117 369 
257 477 73 
63 106 152 8 
257 328 129 383 434 22 163 
242 164 175 152 67 357 309 184 
455 483 265 346 62 357 118 
38 455 131 340 282 309 486 485 257 166 
458 497 372 305 257 370 486 
455 86 455 47 269 203 184 
62 186 470 169 285 353 309 68 189 257 222 
159 151 251 53 
257 206 470 169 250 271 367 68 
257 395 462 376 
271 289 345 191 226 
269 346 62 357 378 234 173 
455 47 340 250 33 309 104 265 344 
458 131 340 153 205 
132 265 373 59 
458 316 271 289 68 
132 426 476 306 269 234 286 
269 346 50 309 127 264 
57 271 33 191 413 234 13 417 
257 207 462 308 44 
455 362 309 104 446 275 203 257 416 
179 47 309 349 184 203 174 90 458 129 
257 395 263 462 251 203 212 418 
458 353 309 153 257 365 
257 21 175 64 265 
455 86 269 191 257 291 263 234 205 38 269 191 257 291 263 234 184 
134 344 129 257 285 
455 86 269 11 384 
63 47 62 393 265 346 453 309 396 
455 351 362 242 309 127 469 458 129 
335 62 330 490 
257 465 250 271 367 68 189 493 222 
269 346 134 257 451 33 
63 250 309 104 269 458 129 
257 28 151 485 309 257 465 
257 170 495 309 68 189 257 181 
455 358 47 309 177 455 250 62 357 115 458 129 
458 462 214 427 
62 295 462 251 242 115 
231 462 251 309 127 209 53 
269 346 50 234 426 225 
63 358 47 309 349 203 257 416 458 129 
242 462 199 63 362 
271 270 191 128 427 
231 131 134 68 189 257 181 
458 474 62 496 270 38 388 172 
265 42 191 340 99 
227 212 22 163 
455 296 273 453 309 349 174 387 
455 351 47 309 2 174 27 260 231 129 
132 462 269 96 257 443 
269 346 182 469 272 418 
144 227 269 346 49 152 185 105 
132 455 131 340 59 174 278 
63 151 270 434 458 129 
269 346 257 392 378 309 2 
257 40 462 413 234 374 217 
179 47 309 305 383 203 496 114 
455 104 340 86 199 265 462 154 129 
271 327 47 152 128 
92 191 271 367 341 68 189 257 222 
257 425 364 64 269 
269 462 84 33 309 82 189 257 70 129 
139 111 309 311 203 31 
265 191 62 67 107 369 
215 47 134 36 257 91 
231 129 257 443 202 127 124 32 
132 96 269 346 17 
335 92 22 332 434 
158 329 
383 29 352 195 119 402 482 
269 351 191 340 257 97 
63 351 104 340 47 394 29 28 89 242 369 458 129 
38 92 462 423 309 269 
242 462 134 234 257 357 336 257 338 
132 63 86 269 346 62 489 281 38 63 47 309 121 24 265 
132 92 191 271 59 234 195 
231 88 426 172 270 34 18 
428 151 163 240 317 
455 296 460 453 309 396 487 257 384 
257 21 175 64 394 207 189 192 
92 151 275 455 362 309 104 240 62 387 
455 497 218 485 415 493 
269 346 310 336 257 170 210 
132 231 11 127 357 
455 103 257 243 431 340 244 378 231 129 
455 288 103 234 257 392 
46 47 309 47 332 23 270 260 411 
62 40 191 491 
455 11 134 127 64 231 204 
139 47 134 152 124 
458 175 270 39 369 458 4 472 
257 66 7 308 367 207 234 95 278 
269 191 24 62 496 424 
63 47 309 401 415 269 242 217 
257 241 460 151 308 44 
269 462 274 242 325 230 59 
62 470 169 285 497 340 127 180 234 68 
257 392 455 106 249 205 2 
496 114 122 47 309 258 286 231 129 
347 269 346 50 269 346 50 
63 284 127 203 257 395 377 
422 175 361 265 102 
132 234 84 242 462 257 49 118 455 4 104 
269 346 62 334 443 84 
132 458 129 438 338 230 472 278 234 257 416 
215 131 134 142 68 
455 296 453 309 257 259 
458 307 309 121 257 459 162 
132 231 131 47 428 258 
458 191 209 257 374 115 
92 346 423 309 269 
455 104 340 24 205 
438 90 131 134 142 65 62 60 475 257 359 326 
242 462 438 33 336 257 115 41 
335 179 358 218 203 
241 202 340 408 28 
458 131 340 142 86 69 179 22 491 
257 12 170 250 271 367 68 
38 458 346 227 101 
455 351 362 309 104 174 27 118 
241 151 129 309 127 308 44 
46 362 13 466 
291 84 462 257 291 33 234 184 
455 4 244 62 437 89 257 168 
269 175 423 309 104 415 242 458 129 
269 346 268 257 97 
455 11 6 458 129 
383 341 120 436 
206 133 497 134 127 180 234 68 
455 351 6 309 2 174 260 
62 305 462 62 305 458 129 
63 86 423 268 269 
265 462 268 309 59 
455 483 269 191 257 291 118 309 104 231 129 
458 131 134 408 289 28 
257 299 202 408 271 289 28 
92 151 453 309 127 62 391 336 357 375 
63 351 362 173 309 166 485 38 71 438 294 
455 296 453 309 187 485 62 396 
455 358 6 38 60 46 381 
63 11 401 415 205 20 179 104 
269 346 288 24 242 458 129 
456 115 63 22 340 198 309 104 62 391 
257 465 353 309 417 257 297 91 
439 120 22 491 
455 362 309 305 265 
455 104 340 47 265 146 
439 120 22 128 163 
132 265 346 257 384 369 
269 191 174 263 
347 455 4 244 257 348 455 11 
92 462 62 489 130 309 319 
269 346 257 263 336 257 366 368 
179 432 453 309 349 173 
210 11 273 127 257 97 264 132 269 11 319 189 
242 462 199 63 473 
455 483 126 434 104 
455 483 179 230 47 152 163 142 
242 175 309 218 309 72 384 84 458 129 
269 191 174 392 33 
269 351 191 340 174 441 
458 191 251 309 127 124 324 62 170 334 
215 202 134 417 394 146 268 257 427 330 
62 455 104 340 96 483 268 269 24 265 
46 4 134 396 203 92 
84 231 113 340 282 269 254 
455 11 218 309 396 
458 462 251 309 315 301 
458 351 182 41 357 
89 257 33 458 191 209 
265 91 57 497 134 127 36 
257 21 462 453 309 59 458 129 
269 191 13 27 223 263 
63 4 134 134 127 264 
38 458 373 351 282 269 
38 347 63 432 134 189 257 136 63 432 67 337 
257 159 47 134 152 209 
257 425 364 462 134 270 336 493 
46 106 474 354 327 84 
265 202 340 127 257 291 130 309 319 234 184 
257 419 462 54 234 376 
222 131 134 408 289 28 
179 182 62 50 260 
265 462 41 442 309 59 257 260 411 458 129 
84 438 281 462 437 
269 495 309 417 146 
480 175 439 448 
227 185 22 209 56 72 160 334 456 34 
242 191 134 13 451 407 
458 131 134 65 62 60 371 68 
257 299 129 458 497 134 408 332 28 
266 434 22 163 
270 35 122 319 62 489 130 
132 46 113 340 244 300 270 346 291 309 210 
231 495 38 179 388 309 334 
257 299 495 309 68 289 
257 159 22 322 156 
347 458 131 458 202 127 163 
458 129 458 202 65 257 466 
458 73 458 250 271 289 28 
455 351 497 340 104 269 
309 265 384 458 404 234 
455 131 340 65 257 60 
372 335 269 346 134 469 
63 47 62 277 84 458 129 
101 462 101 458 129 
458 353 289 68 189 257 443 
179 113 340 104 199 63 104 
289 80 22 54 234 171 
38 265 346 134 438 49 165 
38 455 177 46 11 134 282 203 
455 483 269 462 62 357 411 458 129 
455 483 63 47 62 357 429 
231 129 231 497 134 142 417 28 
257 21 129 269 250 271 367 68 
458 129 458 11 396 269 
179 47 49 152 92 234 62 441 
215 128 271 327 
174 260 462 134 357 458 129 
179 106 474 62 50 488 458 129 
324 242 115 458 250 273 474 236 257 297 447 
269 346 62 67 107 443 
458 214 353 309 408 438 153 
179 22 357 434 
257 281 462 489 
242 462 270 336 205 
269 287 271 385 28 
458 436 212 105 381 
63 284 47 152 54 189 30 334 
242 462 426 338 
265 44 462 460 308 130 
46 351 47 309 2 415 199 46 47 
269 346 62 310 336 210 
269 462 134 13 49 259 41 
269 346 24 62 387 396 
458 7 415 438 387 
179 432 310 336 174 387 
242 393 175 62 429 
92 230 127 345 
458 175 71 62 101 
455 483 63 358 2 62 357 260 
257 170 124 309 75 184 458 73 
269 191 134 274 20 458 88 257 338 
242 373 134 127 13 456 429 
269 191 13 452 
84 265 441 462 264 
179 227 436 189 257 441 336 463 
458 110 455 284 
132 455 296 453 309 311 234 269 
455 131 340 47 174 320 132 265 191 257 451 33 
455 131 340 86 14 231 191 
63 293 201 29 458 129 
257 169 131 134 65 62 60 371 68 
458 191 291 32 
269 346 152 62 489 33 458 129 
455 103 46 151 41 
132 215 250 271 367 91 
201 389 11 47 446 216 327 
458 214 353 289 68 
215 495 309 68 189 257 350 222 
265 346 227 458 129 
38 269 462 257 297 50 270 
89 265 33 455 64 269 
269 191 134 99 69 458 202 160 
257 91 131 134 153 257 329 
257 66 346 278 331 
335 269 191 33 234 257 166 
63 293 309 384 242 
179 445 13 451 447 456 34 203 422 
257 141 462 54 309 65 156 
63 104 340 362 309 47 309 104 379 173 
458 346 134 453 309 197 280 475 62 348 
84 458 346 257 392 203 257 78 
242 462 340 62 303 
63 250 62 357 429 132 269 346 134 469 344 
231 436 430 256 226 309 62 302 
62 395 35 191 251 301 
242 462 134 62 215 164 
269 96 431 340 311 265 130 458 129 
215 129 185 434 22 491 
455 104 340 362 434 309 282 491 458 129 
458 191 427 189 493 482 456 34 
455 497 104 269 231 129 
242 462 62 50 305 234 286 
63 293 309 305 185 
46 432 460 8 309 472 257 437 
257 341 175 64 242 
455 349 242 240 62 496 310 336 174 210 
455 104 340 362 309 349 269 32 
63 104 269 100 63 362 309 270 129 
265 346 134 257 76 130 
63 284 134 408 485 
271 237 247 191 316 
257 185 22 134 491 
179 356 423 
257 80 22 54 234 383 105 
265 202 288 127 50 
179 129 179 202 6 32 192 
271 270 175 404 286 
179 404 269 257 29 130 
271 270 191 116 142 
62 215 285 497 134 127 180 234 68 376 
30 191 413 234 156 
458 250 261 3 257 297 441 
38 265 462 257 126 107 118 
63 104 340 86 199 269 191 
460 269 175 17 49 270 336 95 456 272 
347 46 24 269 46 24 269 
269 191 62 33 336 243 
242 341 11 121 231 468 87 192 
257 21 129 269 497 134 68 189 257 91 
435 390 177 332 482 151 58 
257 368 250 257 395 177 
132 458 131 134 408 289 28 
458 250 271 68 376 
126 434 104 340 362 309 218 254 458 129 
63 497 177 423 
257 141 131 134 417 95 411 
347 179 362 286 309 396 63 11 396 
63 106 474 309 408 485 62 323 101 
132 458 131 134 166 485 
455 183 242 240 62 294 
57 270 141 191 88 254 171 
132 28 22 340 322 487 229 
46 351 104 340 349 457 24 265 
269 462 50 309 218 197 
458 129 458 250 152 220 415 438 81 234 257 236 185 418 
265 346 227 269 462 458 129 
63 251 265 263 
132 467 133 353 309 417 173 
92 346 271 130 63 4 244 269 300 475 205 458 129 
13 407 462 251 309 244 378 374 34 
92 346 423 309 314 173 264 231 129 
257 51 129 203 62 477 
265 409 462 460 308 130 
455 351 250 62 50 33 
257 12 341 131 134 68 189 257 91 
458 96 202 340 
458 214 284 47 152 438 338 346 277 
271 482 47 152 316 
304 208 253 444 208 
63 11 319 234 463 
126 22 475 257 216 389 
269 346 152 62 357 71 458 129 192 
38 428 177 92 462 460 62 489 130 309 319 
46 151 257 416 336 257 338 
455 96 473 265 270 458 129 
179 151 8 309 472 62 166 264 231 129 
179 362 309 127 223 
92 191 271 367 68 475 43 133 
132 63 106 250 62 357 210 
458 250 152 437 203 257 211 
10 346 33 11 218 
57 92 462 62 489 130 309 319 
242 462 62 463 489 129 
269 191 423 309 104 415 286 458 129 
63 131 134 47 62 357 217 458 73 
92 462 271 29 130 309 282 203 
455 483 269 346 453 309 127 62 357 397 
46 86 269 38 455 86 269 
270 191 163 190 242 115 
458 131 340 293 269 227 
438 409 462 54 234 374 217 
62 263 191 134 251 309 127 209 487 301 
458 497 134 142 127 180 234 68 156 
455 358 314 220 189 269 
92 346 423 63 4 104 458 129 
265 462 199 455 129 
92 462 460 62 489 130 309 319 
269 346 357 203 62 130 
242 462 257 33 234 459 
132 269 131 340 55 173 
132 265 462 340 58 
458 4 47 269 227 
455 351 47 309 472 257 126 336 269 
185 12 120 22 491 
257 451 397 191 182 53 
242 462 62 50 441 38 143 151 174 434 
455 96 24 242 393 
242 191 257 451 397 262 257 400 
132 92 358 127 62 496 51 38 63 358 35 234 265 
132 269 202 47 152 50 309 305 
395 159 22 251 176 171 
62 338 462 24 62 387 
132 265 191 257 167 369 
257 451 159 22 251 229 
347 265 431 340 104 257 259 199 346 88 
269 346 62 67 107 305 
455 202 340 362 309 305 265 130 
257 70 316 271 68 
269 191 134 274 69 179 202 127 116 37 209 
10 129 231 175 62 168 309 71 189 
63 106 474 269 469 264 
126 151 312 336 257 295 51 
63 86 63 151 134 453 309 55 257 165 
257 85 129 257 207 183 378 156 
92 191 271 68 475 170 133 
257 465 175 353 309 68 
63 473 309 305 234 173 
63 47 29 400 
455 250 50 19 475 257 29 400 
132 265 11 134 59 257 119 
257 133 353 289 68 
455 250 257 33 336 174 210 
269 202 47 152 257 49 130 
458 287 464 28 
270 43 214 191 163 
455 86 423 268 269 
439 120 22 214 128 163 
257 466 462 92 458 129 
96 63 131 340 188 269 
63 151 453 309 104 242 
63 110 265 191 134 357 101 
455 497 340 349 269 475 92 
257 12 434 47 17 173 
458 250 273 249 233 324 
257 295 51 131 134 142 68 
455 96 284 47 306 
104 455 483 179 4 104 269 
179 113 340 188 265 
231 191 226 309 62 302 
265 346 67 107 309 184 
242 115 455 356 254 
257 260 175 152 357 309 184 458 129 
132 327 121 
62 441 381 275 22 196 446 
179 47 134 152 209 
38 179 104 340 24 269 
63 11 121 426 44 
455 483 458 346 453 309 472 269 84 
347 179 250 340 92 202 460 127 243 
185 250 436 190 
265 191 439 492 18 
46 49 244 254 347 46 187 203 
257 141 131 134 68 142 
423 497 55 173 
269 346 288 446 458 129 
455 483 269 462 257 392 
179 388 254 38 474 30 224 
38 179 104 340 47 196 33 309 104 269 
455 47 62 391 336 223 33 
63 11 486 485 257 186 137 458 73 
179 497 134 142 127 180 234 68 
132 179 131 340 362 309 408 173 62 437 
257 409 462 251 309 456 266 332 418 
257 399 353 309 408 28 
179 22 209 192 
84 63 86 92 462 62 357 298 458 129 
38 63 4 273 55 220 
132 257 70 361 265 
405 455 104 340 483 268 173 89 227 
269 346 62 117 305 231 129 
132 455 483 63 151 
455 358 71 257 392 294 455 4 
38 265 346 134 257 443 336 29 452 329 
257 302 287 271 289 28 336 233 102 
271 270 202 408 13 153 
455 104 340 47 62 172 
265 346 62 153 265 191 318 56 257 302 231 129 
458 131 134 153 257 365 
496 80 47 134 152 54 
63 293 332 258 458 129 
257 395 397 462 229 
458 287 184 257 397 458 129 
63 151 62 39 387 
269 351 131 340 319 174 130 89 227 
63 11 134 47 309 59 265 
458 431 340 47 271 168 
92 22 271 289 367 28 
179 22 134 453 309 59 269 
257 299 495 309 68 189 257 91 
257 159 47 134 152 316 398 
269 175 152 62 387 
133 131 134 142 408 394 28 336 257 80 
257 165 462 262 286 38 257 76 66 
257 12 170 353 309 68 
63 227 250 72 372 437 
455 483 269 346 67 357 350 458 129 
63 432 453 189 415 242 415 37 379 233 
257 241 22 427 381 
269 346 134 257 451 270 458 346 250 242 281 
269 462 134 274 347 179 11 160 
132 455 483 269 191 62 357 130 309 315 
45 455 483 265 191 62 117 310 336 269 
458 462 134 257 49 270 
455 284 47 250 265 270 
265 346 453 309 258 286 
265 346 134 62 165 
269 497 47 152 
269 373 218 351 144 426 221 
257 330 191 226 309 62 302 
455 86 475 257 236 265 231 4 218 197 
92 191 271 68 189 53 346 207 475 257 410 
257 395 91 191 251 203 266 105 
257 21 353 394 289 68 
335 92 191 257 466 
455 319 100 455 296 404 
13 409 94 229 
257 91 497 340 127 142 36 
458 131 134 408 332 28 
269 431 340 96 
231 131 134 47 29 28 
63 96 293 28 
269 191 340 99 20 458 436 
341 133 214 497 134 127 180 234 68 
265 462 357 458 129 
269 346 24 453 309 257 90 
269 175 474 423 309 104 415 265 458 129 
334 133 497 340 127 142 180 234 289 28 
62 326 225 462 161 192 234 332 28 
132 347 269 462 340 269 471 340 59 
45 265 346 271 165 
271 270 191 491 203 394 336 493 253 
92 230 127 59 
271 270 175 152 116 203 257 443 
269 346 152 62 464 492 231 129 
455 106 474 309 282 197 309 174 317 231 129 
269 191 134 274 69 458 202 314 438 341 259 
179 151 308 44 
257 170 175 273 52 257 150 309 267 
455 473 309 282 254 92 
62 285 234 257 215 75 353 309 408 289 28 
271 289 28 
265 497 244 62 34 
269 191 187 309 62 35 242 34 
234 184 269 346 117 84 
269 191 257 392 315 42 203 257 424 
264 346 62 429 309 282 383 234 257 298 336 270 
269 284 340 127 72 181 
455 110 265 191 257 384 336 174 210 231 129 
185 120 22 163 
257 365 64 257 91 
480 346 470 169 468 257 359 326 265 269 175 344 309 244 394 345 
455 113 340 104 67 196 268 265 
132 458 473 309 86 199 202 127 187 203 95 378 
257 476 109 250 271 367 68 
92 346 423 46 4 104 
455 47 309 104 265 32 
84 269 346 308 426 320 
269 191 134 99 347 394 215 22 491 
132 11 458 127 95 494 
265 346 351 257 315 
265 175 423 309 104 415 269 
479 204 269 175 271 237 454 
269 346 62 294 412 33 458 129 
63 358 104 227 203 426 333 309 258 46 
455 106 273 249 269 
179 22 427 53 
269 191 134 99 69 257 383 202 160 
269 462 460 308 44 
132 269 471 340 282 283 303 19 
179 22 67 357 
132 63 432 134 453 309 127 92 
275 22 453 174 130 458 129 
84 455 349 62 416 
458 79 184 347 455 202 258 173 254 
269 373 127 174 456 270 
231 129 231 353 
265 346 257 117 181 264 
439 22 427 
257 164 109 497 134 127 180 234 68 
271 455 104 340 24 309 349 269 
455 351 104 340 188 203 265 
231 346 134 491 
38 269 122 134 127 257 456 
132 265 346 257 369 
257 195 381 22 209 
434 473 309 218 231 129 
92 191 428 357 350 
347 455 2 357 269 346 174 441 
428 129 179 202 
92 191 271 367 68 475 206 133 
269 462 271 446 264 
458 129 458 202 396 257 295 203 334 
257 70 129 271 263 250 152 316 
269 11 335 355 248 
132 265 497 59 156 
132 455 11 305 257 243 
455 296 453 309 145 185 
132 84 63 47 62 297 429 
179 432 460 107 309 286 458 129 
132 455 497 47 152 437 
458 11 381 25 444 208 
455 47 134 249 205 264 458 129 
269 191 62 50 185 448 458 73 
257 425 364 462 134 228 205 
179 131 134 38 179 151 134 251 309 104 45 
132 89 257 97 33 92 346 62 391 63 4 104 
179 362 309 127 310 336 257 162 
132 269 284 340 127 
221 11 96 244 378 
455 104 340 86 199 174 416 462 458 129 
455 104 340 86 14 269 191 458 129 
257 91 191 209 192 
216 133 495 309 68 
242 191 134 62 243 
257 70 183 271 345 
458 17 203 257 297 447 456 115 
154 346 451 55 462 480 
428 11 134 218 197 
132 458 497 134 188 255 202 207 
63 483 63 47 62 67 39 443 458 129 
269 191 62 96 117 260 
269 431 340 47 309 127 341 466 458 129 
63 47 309 104 269 458 129 
257 10 66 110 179 22 
257 91 497 134 127 36 56 257 170 
63 151 134 453 300 
92 191 271 33 234 265 
257 21 129 229 265 271 263 250 344 152 316 
458 129 455 362 46 309 47 269 234 257 294 
92 462 423 309 26 
242 462 438 40 370 486 
63 351 497 340 258 269 
179 22 134 226 309 257 302 
269 191 233 451 424 321 463 
299 159 151 251 53 
458 346 453 309 127 92 
458 73 57 455 483 92 11 127 459 84 
95 159 22 134 322 
132 63 104 340 411 265 240 62 393 
242 462 62 67 357 259 
38 458 4 104 269 32 
458 351 373 127 291 
233 102 191 134 209 
458 191 209 456 376 
179 47 309 59 
455 124 134 309 483 268 269 458 129 
455 483 458 346 62 50 494 
455 11 351 121 309 2 269 
455 106 152 414 62 391 
92 191 271 367 68 56 257 341 
242 462 166 101 458 204 
269 122 134 127 274 309 29 434 
455 131 340 86 205 
179 22 226 309 62 216 302 
231 471 340 59 154 129 
405 4 127 446 
269 346 288 257 97 118 
242 462 134 438 466 458 129 
266 400 474 491 
144 227 269 191 33 309 319 
179 432 257 416 
269 346 474 309 127 458 129 
63 11 121 487 426 395 463 458 73 
132 234 242 270 269 471 340 
269 191 257 451 99 409 336 394 336 257 148 494 346 387 
257 80 11 384 156 
423 462 36 257 399 129 
334 87 129 92 22 271 289 28 
63 362 269 309 127 182 
199 462 257 165 
269 11 127 438 451 25 309 480 
383 241 22 491 
265 346 62 117 59 
455 47 250 45 139 327 
458 4 134 472 269 
92 462 271 48 234 257 138 231 129 
84 179 86 179 4 
63 4 134 68 289 89 242 33 
257 162 497 244 492 
92 151 288 434 14 104 340 188 203 46 
271 221 47 152 445 3 335 
84 346 257 33 309 384 205 
132 458 129 265 263 191 316 324 229 
179 250 271 289 146 
257 166 230 319 189 458 129 
179 306 257 374 383 375 
215 129 257 207 191 308 44 
132 458 131 269 415 62 411 
92 462 214 29 343 203 257 389 
462 269 453 309 244 174 210 
265 346 62 489 437 
46 273 86 458 129 
395 159 151 134 251 487 176 374 217 
458 209 271 28 
57 16 104 134 47 257 291 309 35 37 71 234 90 
242 115 383 11 319 
455 284 127 277 
179 47 351 62 464 492 
79 268 438 416 278 458 129 455 104 340 86 
455 351 362 309 472 269 
257 299 129 237 345 373 127 226 381 
455 483 63 151 453 309 127 227 291 
458 129 227 22 163 
227 257 400 86 13 27 325 458 129 
257 330 191 335 209 
179 22 381 209 379 394 482 
479 175 134 52 205 309 65 
257 341 175 495 309 104 45 
132 265 11 218 
455 351 131 340 104 265 
132 455 4 401 415 269 
269 346 84 41 442 
92 191 271 367 68 475 29 342 
138 133 47 316 271 68 189 257 411 
257 425 178 431 134 
458 131 89 265 369 
257 43 393 175 323 466 
231 129 231 131 134 86 257 330 346 102 
215 133 495 309 68 189 257 222 
92 462 271 367 341 68 475 257 341 
438 211 175 134 152 356 
63 358 460 47 62 357 33 458 129 
269 431 340 47 257 19 336 257 425 342 
38 269 346 107 234 184 
458 129 92 202 127 30 407 229 
458 191 209 379 482 
455 296 483 63 432 357 
231 431 340 483 231 11 6 32 
257 443 462 308 44 
215 47 353 309 68 
269 175 423 309 104 415 286 
257 294 191 71 383 105 381 
46 106 460 474 309 187 269 203 2 
231 462 134 116 203 257 443 
455 131 340 362 309 384 24 265 
269 346 62 391 336 311 
299 159 22 251 381 242 217 
63 47 309 458 129 
186 133 47 353 309 68 
132 242 462 134 257 369 
132 377 105 381 458 322 458 11 396 32 
257 159 47 152 257 97 
11 46 71 234 277 
444 208 64 257 482 
265 41 191 64 
63 497 134 48 75 
269 462 251 309 472 62 263 324 257 384 336 257 115 
480 175 252 448 
63 103 241 11 104 257 97 
179 284 106 468 184 
257 195 22 209 144 185 418 
455 358 127 257 451 270 231 129 
458 431 340 86 14 179 151 
257 383 329 47 64 257 222 
144 265 269 191 227 101 
56 171 269 191 308 320 
257 354 368 462 251 309 244 485 257 181 374 217 
242 462 199 462 404 62 61 409 458 129 
269 284 127 62 357 270 
458 353 309 153 394 336 257 195 
244 184 300 475 264 
460 269 250 428 117 327 
271 270 175 152 427 
38 63 358 401 415 269 381 
132 179 497 340 413 269 485 
257 285 346 153 191 134 318 
271 270 191 491 38 257 377 22 427 
265 191 270 336 174 275 
458 404 481 221 
132 269 462 340 203 75 344 
269 497 244 492 
157 133 495 309 68 
63 474 257 451 270 
458 353 309 68 229 
455 351 104 340 282 269 
423 462 318 344 
132 466 462 340 257 181 
46 113 340 244 265 300 475 173 
246 195 22 427 
179 497 355 395 144 265 
271 123 250 152 128 
215 214 495 309 68 
257 395 462 54 301 
201 397 462 446 
257 333 388 254 
458 4 49 103 458 431 340 384 485 24 257 241 
257 341 175 134 36 237 222 
179 22 209 53 
383 241 214 47 212 448 
43 133 64 257 222 
350 222 129 266 434 250 436 
352 215 202 134 68 189 257 222 
38 179 163 173 
458 131 134 68 189 257 80 
434 151 337 264 231 129 
257 395 462 171 
46 47 309 401 415 493 275 
215 202 134 408 394 28 268 257 44 
63 104 340 293 265 466 458 129 
231 436 185 105 381 
458 200 415 212 448 
475 92 458 497 340 282 337 
231 250 134 344 152 116 
242 462 438 456 429 
132 257 396 462 340 469 
257 186 393 462 
455 296 134 8 309 145 62 172 71 
257 243 191 453 189 
269 346 67 446 
257 141 129 62 263 191 251 374 217 
257 400 218 197 257 374 441 
4 46 188 265 
265 346 62 391 336 466 
455 131 340 282 309 2 265 260 
257 406 137 382 
455 351 473 309 349 205 458 129 
231 250 309 311 89 269 
341 354 133 353 309 68 189 257 477 
132 455 214 483 92 151 139 336 257 97 327 
63 273 131 38 63 104 340 84 
265 455 497 340 104 
257 277 79 
132 257 126 107 118 462 309 305 
269 230 134 127 52 458 129 
272 22 427 
257 333 388 309 438 211 
242 462 257 451 260 
269 346 351 257 130 455 2 
38 139 188 265 11 273 59 
132 179 284 340 244 269 254 189 227 257 241 
132 179 471 340 47 13 130 
269 191 340 274 20 257 317 436 
455 104 340 362 309 319 309 243 
455 106 273 249 269 324 
458 11 288 127 265 
132 269 346 62 50 110 
269 131 134 153 257 465 
234 184 265 346 257 126 107 118 
63 86 257 325 
215 131 134 408 438 153 
92 151 29 327 
458 41 191 79 69 458 202 127 197 
38 455 104 340 24 269 
215 64 257 91 
458 200 415 252 448 
390 36 257 91 
257 91 287 271 28 268 257 80 
132 265 122 134 244 489 
38 265 191 340 288 62 357 118 
179 47 64 269 
227 377 47 64 257 482 
242 76 468 184 265 455 250 249 139 275 
265 346 134 174 118 
38 179 11 305 379 184 
265 346 270 336 257 117 275 
257 277 191 340 403 10 
231 273 307 309 319 197 
269 462 274 458 129 
62 425 342 285 497 134 127 180 234 68 
257 383 471 340 127 124 487 122 
92 191 67 39 19 458 129 
458 175 134 152 249 203 398 3 376 
303 312 151 220 189 13 27 403 
132 242 471 340 314 453 
460 383 418 104 134 472 62 115 
270 299 129 265 373 244 185 105 
458 191 273 356 
132 242 191 257 424 321 
458 462 62 330 336 345 
422 17 234 351 257 297 33 203 252 375 
38 347 179 218 415 286 38 35 415 286 63 11 408 205 197 13 338 
269 4 134 127 111 
423 462 36 
104 46 19 265 
257 299 214 353 309 408 29 28 
323 462 99 268 257 410 
269 346 134 257 97 231 129 
63 22 310 336 438 51 
257 409 94 62 217 18 
257 10 157 250 271 367 68 
257 341 11 337 265 441 
171 346 35 388 245 379 222 336 452 123 
428 151 460 343 
159 497 244 266 105 
455 351 113 340 188 265 455 131 265 
455 351 250 309 282 254 336 92 
455 11 127 197 231 129 
269 346 24 269 191 340 62 259 
458 307 286 309 282 254 
271 123 191 128 360 257 35 
231 436 265 115 
242 462 257 395 115 
179 22 50 375 458 129 
458 131 340 472 269 254 
257 80 22 251 309 121 487 192 
455 7 264 415 423 
458 131 340 47 29 28 
257 277 191 79 
269 346 210 231 129 
231 131 134 86 173 56 153 
455 47 134 226 394 395 263 
455 11 127 308 257 248 458 73 
441 497 134 142 127 180 234 68 
269 191 62 477 
38 6 32 374 115 
257 393 474 189 415 269 
455 351 473 309 127 254 336 92 
63 106 474 309 408 269 33 
458 191 427 442 456 34 
458 346 237 62 357 81 
395 159 22 134 251 487 156 
92 346 41 196 123 
265 346 257 130 455 473 309 2 
434 96 104 265 
179 22 209 176 242 34 
265 346 174 313 
317 104 340 47 394 327 
269 250 152 234 62 489 33 
179 104 340 311 24 265 
455 296 203 257 297 217 
133 129 179 250 271 289 28 
455 103 309 104 269 32 
257 409 11 125 244 418 
231 79 87 
257 330 191 340 142 116 38 215 131 340 417 438 153 
462 30 424 321 305 374 
455 483 455 4 472 269 
271 35 462 125 324 156 
132 455 296 134 337 
257 395 294 462 376 
179 104 340 483 336 286 
132 92 462 271 247 189 265 369 
38 458 191 340 257 49 270 
255 11 127 257 297 137 
104 46 483 265 346 62 130 309 244 197 257 303 
347 269 346 357 455 4 121 
257 91 316 143 29 448 
63 284 340 47 309 
269 346 24 455 296 62 310 336 257 387 458 129 
455 296 134 290 265 
179 129 63 106 474 233 
132 269 346 134 58 84 
257 439 22 226 309 302 
84 63 106 474 309 472 269 311 
38 231 11 104 270 29 118 
231 129 231 131 340 86 199 191 356 
269 346 134 265 179 497 340 218 458 129 144 257 407 
390 353 309 68 289 
269 462 371 339 454 
335 275 202 282 254 336 320 
265 334 495 309 417 173 
242 462 357 458 129 
246 329 47 64 269 
92 47 152 62 391 336 327 203 257 21 458 129 
458 473 184 309 127 62 494 
12 215 133 495 309 68 
132 455 104 340 483 455 362 309 55 
257 302 353 309 68 189 376 
257 91 287 271 289 28 268 257 29 383 491 317 
271 270 191 491 192 
132 422 175 226 271 345 412 1 
334 133 497 134 127 180 234 68 442 301 
257 409 250 152 54 309 315 229 
455 362 309 86 332 
458 191 381 427 56 215 
455 473 309 59 265 458 129 
38 458 346 250 49 377 375 
179 47 62 96 357 270 
257 401 108 414 
426 311 462 415 434 
257 283 303 122 472 257 395 263 
231 129 231 11 2 234 383 332 492 
257 85 129 192 265 257 419 202 244 378 
203 257 384 458 183 257 259 
438 409 462 413 234 374 34 
455 113 340 319 197 9 257 303 
62 463 202 408 173 439 332 492 203 90 
138 133 250 271 367 68 
458 468 184 455 4 60 173 394 33 
92 22 271 29 375 156 
341 292 
63 432 257 392 393 203 257 178 458 129 
455 113 340 188 179 131 265 309 184 231 129 
299 159 22 134 251 487 229 
458 183 245 38 191 273 249 32 
92 214 191 270 420 
257 80 214 331 257 425 364 444 208 480 38 1 
92 462 271 293 309 396 458 129 
458 214 191 13 456 81 
38 455 250 257 456 254 
269 346 273 152 223 92 
38 179 151 340 414 
455 104 340 349 257 117 401 
455 202 47 128 269 231 468 87 
269 131 340 311 291 300 
212 47 152 163 
455 106 306 174 26 242 115 
455 124 132 455 497 340 104 269 
269 462 288 257 97 
458 250 271 29 28 
216 215 497 134 142 127 180 234 68 
46 358 273 311 32 
45 179 7 309 258 
269 175 288 152 257 443 
242 462 257 126 107 118 
275 497 340 127 332 446 84 
269 131 134 408 257 153 336 257 465 
455 104 340 188 269 458 129 
269 11 355 274 360 257 368 346 407 
257 215 250 271 367 68 189 257 91 
92 191 271 68 475 390 
92 462 271 332 466 
455 180 265 369 
132 269 346 453 309 244 62 464 105 
455 110 455 191 453 309 305 269 
423 191 220 254 405 
269 346 62 446 325 458 129 
455 358 244 265 401 394 441 
299 159 151 134 251 324 229 
257 348 465 191 134 322 
126 47 152 209 
269 346 438 153 189 269 
455 106 152 220 
92 462 271 237 338 
257 476 413 485 257 374 252 448 
265 11 84 55 
257 407 462 54 309 384 192 
215 497 134 127 180 234 62 68 
46 113 340 351 166 485 
92 151 29 367 327 
269 288 175 152 
269 346 223 458 129 
455 104 340 483 265 346 257 291 118 309 104 458 129 
455 296 134 453 309 472 62 263 84 
455 113 340 47 205 
455 202 340 59 269 
428 434 282 269 
395 159 22 134 251 487 257 384 336 257 115 
132 104 46 349 265 
179 273 22 116 
455 483 269 497 127 458 129 
458 346 288 152 62 494 
265 346 257 130 455 104 275 
455 250 62 429 309 472 257 393 38 455 131 340 104 269 
383 22 209 456 217 
269 381 322 179 250 152 163 
179 48 205 38 151 111 56 205 
265 260 191 214 306 56 257 425 
455 358 472 269 485 309 46 129 176 
215 495 309 68 189 257 60 
265 91 497 134 127 36 
455 110 269 191 50 
347 179 408 269 179 11 282 269 458 129 
265 175 134 152 257 443 242 115 
458 353 309 408 438 153 
455 358 104 493 275 332 257 374 33 
334 133 47 495 309 68 189 257 443 
334 133 497 134 127 180 234 68 
80 22 54 381 53 
46 47 309 258 286 
84 179 47 309 82 32 
257 409 462 251 309 456 487 374 301 
132 347 455 113 340 455 471 340 
10 129 192 
227 257 195 250 152 437 203 257 211 
266 47 124 
46 47 309 2 415 269 
92 191 423 46 497 96 104 189 257 224 
242 462 350 309 233 
208 462 452 137 234 257 213 
434 151 223 309 188 199 179 24 
257 133 287 271 289 28 
458 111 309 408 203 
63 432 134 264 309 104 265 
455 474 309 257 456 55 
438 409 94 229 
227 185 47 64 257 482 
257 35 191 251 309 127 337 
132 234 139 241 257 327 121 
257 392 393 346 453 309 305 
38 428 103 458 346 291 
38 179 468 184 46 47 309 282 254 
269 346 33 309 2 
455 103 242 11 59 174 416 458 129 
62 305 462 62 357 260 
38 269 346 257 291 33 
242 270 388 167 
257 263 191 316 56 257 141 346 366 368 
269 346 134 257 130 63 362 309 305 
257 44 191 189 
455 4 38 455 104 458 129 
242 497 214 127 257 443 264 231 73 
257 243 462 134 469 344 231 129 
241 129 179 131 134 86 
215 177 72 44 462 308 130 
63 432 134 453 309 127 111 458 129 
269 346 41 337 231 129 
269 131 134 153 257 302 
62 395 35 191 54 234 442 156 
269 191 62 357 305 234 286 412 62 39 393 
63 358 47 309 349 14 269 462 
455 351 250 309 188 265 
170 133 193 
458 131 134 267 415 87 
265 462 67 107 458 129 
63 47 271 29 130 309 282 172 231 129 
179 131 340 472 205 203 493 105 
265 346 134 426 165 
257 185 433 151 308 435 44 
242 462 257 49 378 455 86 
132 265 202 340 127 257 130 309 104 269 
241 273 316 269 
12 390 495 309 68 189 257 443 
455 483 265 346 62 117 118 234 184 291 84 
246 497 48 62 145 
455 104 340 349 394 327 458 129 189 156 
458 175 152 234 62 489 33 
257 277 175 64 257 482 
370 170 133 131 340 68 
269 431 340 384 92 
234 95 310 257 283 303 353 309 68 189 257 325 
282 62 496 74 
63 104 340 293 309 104 265 
458 129 269 202 134 55 173 475 453 
84 455 362 309 282 62 315 
257 21 129 139 410 22 163 
179 4 55 62 393 20 179 47 309 
257 120 22 124 203 62 382 170 334 
132 458 131 340 104 269 
269 131 134 153 257 312 
242 131 340 59 265 
257 368 462 251 309 244 485 257 91 374 217 
269 351 131 340 311 
455 362 277 10 309 86 265 63 104 340 362 438 15 264 
257 425 364 11 121 309 104 95 310 309 19 257 459 162 231 129 
84 455 4 282 189 415 174 101 
38 265 497 348 309 117 327 242 217 
458 250 357 320 
63 47 309 104 199 63 104 
271 28 22 316 398 
257 341 351 131 270 118 144 30 
46 47 309 314 189 
257 465 129 269 250 271 68 
458 131 340 417 332 28 
12 133 495 68 
269 346 474 62 391 336 327 
455 177 92 11 127 459 
38 92 462 62 429 63 373 134 127 198 309 104 265 
46 106 474 309 319 189 
455 106 273 250 139 336 205 
38 243 462 199 179 474 
242 462 423 234 173 
257 341 131 340 68 
62 295 462 251 192 
242 270 175 474 174 42 458 129 
458 73 455 188 205 
46 96 104 340 408 269 62 297 110 
257 465 191 214 5 336 
38 257 166 462 469 
434 473 309 35 
462 269 453 309 244 33 
179 362 309 104 13 118 
257 341 462 453 309 293 227 257 258 269 4 282 
92 151 332 400 
458 191 209 376 
132 458 73 265 179 273 79 257 435 341 234 258 
269 346 96 96 107 
257 160 497 244 266 418 
38 84 63 432 88 415 423 
455 110 63 250 357 278 
455 131 340 372 47 309 483 268 269 
234 286 242 462 67 107 
455 293 309 349 269 32 
257 302 214 495 309 417 394 146 
455 296 8 309 104 257 291 118 
395 159 151 251 53 
455 47 340 250 227 265 357 336 62 115 38 458 346 250 62 50 115 
269 11 384 192 
271 289 28 22 322 
132 92 191 271 293 234 265 
458 202 134 408 394 28 336 257 80 
458 436 176 192 
231 79 234 72 44 
242 462 67 107 309 286 
179 47 62 50 393 
92 346 423 309 349 
242 462 134 357 350 
385 28 22 134 318 
269 191 340 357 458 129 
265 11 59 84 
455 104 340 483 434 202 104 265 
257 222 131 134 153 257 330 
383 29 435 120 22 163 
455 362 309 319 309 484 
132 458 88 257 51 190 242 34 
231 431 340 411 309 55 92 
30 212 22 491 203 257 253 
242 462 199 257 120 131 309 173 
132 265 202 244 139 492 
257 302 353 289 68 
458 129 219 312 202 267 381 192 
265 462 41 196 333 
265 462 257 117 165 
269 131 134 408 394 289 28 336 257 25 
38 143 329 86 265 
63 432 8 309 282 300 475 269 
174 387 250 271 466 
63 103 269 11 127 62 357 315 231 129 
455 104 340 104 269 234 257 466 
341 133 129 257 253 22 61 
352 133 202 408 271 28 
257 330 175 327 
455 296 41 337 309 269 257 330 129 
458 191 8 309 104 438 259 
465 133 497 340 127 180 234 68 
458 131 134 282 62 263 
227 22 437 203 257 211 
455 351 4 134 104 265 
269 191 62 357 118 309 104 
265 373 244 62 430 
271 270 346 453 309 55 286 
38 455 474 383 336 205 
383 434 22 491 203 257 303 
144 265 269 175 273 152 257 97 
257 424 321 462 271 446 
458 175 64 257 482 38 462 309 119 409 374 217 
269 351 471 340 311 
257 164 341 250 271 68 
179 47 309 282 469 265 
227 455 4 104 462 174 392 
203 257 395 413 231 306 212 448 
265 346 227 179 131 
242 462 134 62 357 315 
269 346 96 50 
206 133 497 134 142 127 180 234 68 
132 84 462 134 257 33 234 270 
156 462 72 245 441 
242 462 174 210 346 311 
179 106 474 454 
269 351 462 199 269 462 
455 473 265 466 309 258 174 387 
179 177 269 346 134 56 429 
104 46 188 63 4 355 270 178 
179 331 257 286 38 480 
215 129 126 336 257 491 22 16 
132 455 47 309 59 
455 104 340 96 362 309 127 310 336 242 89 227 
269 346 134 257 270 179 362 
132 92 346 62 489 130 309 319 
92 191 271 367 12 68 
179 113 340 55 286 
215 131 134 65 77 
63 432 238 458 129 
309 173 257 107 118 191 265 458 306 269 231 129 
12 341 133 495 394 68 
269 346 310 336 210 458 129 
458 129 126 434 250 88 
462 92 394 416 234 459 
458 462 251 309 315 
257 341 346 263 462 134 251 324 229 
257 294 462 171 
458 495 309 68 
30 383 22 209 379 256 116 
45 265 346 288 453 309 127 
272 170 195 22 214 163 
257 409 94 212 418 18 
140 215 353 309 68 189 28 336 257 443 
455 202 177 242 462 62 162 265 202 244 62 430 
265 202 47 152 107 
257 303 462 54 309 35 301 
132 455 106 474 309 104 269 
373 462 460 291 
257 141 175 64 233 482 
215 382 245 257 389 
227 336 286 47 62 236 
269 346 299 405 
422 284 86 
455 362 269 197 458 129 
455 483 63 4 282 173 458 129 
84 458 346 257 338 346 496 277 
460 154 495 309 417 257 466 
84 63 230 48 205 
269 346 24 394 117 260 
215 497 134 142 127 180 234 68 189 257 91 171 
257 341 175 64 265 
179 151 453 309 472 46 311 458 129 
271 496 123 191 128 
92 346 423 63 4 104 268 269 84 
455 103 265 179 471 340 104 265 
231 204 257 162 497 244 383 309 185 492 
231 202 340 417 438 153 
92 11 127 332 
234 84 231 175 29 311 
179 104 340 396 286 
458 235 175 306 252 336 493 
132 455 191 340 453 309 55 
269 131 134 177 69 269 202 160 
271 76 120 22 491 
231 497 134 142 127 180 234 68 229 
63 358 401 415 269 32 
466 471 340 59 265 
63 432 460 343 62 243 
458 202 134 408 394 28 268 257 465 
271 367 263 191 316 
455 473 309 384 269 
132 257 370 345 131 282 428 19 
458 431 340 293 309 311 
92 462 271 270 14 11 258 286 
38 458 471 340 408 485 324 335 
179 22 251 309 127 209 381 203 257 441 
92 191 271 367 370 68 
46 460 47 62 297 429 154 129 
455 483 269 346 257 392 33 309 319 
179 22 214 226 309 302 
132 269 346 351 62 396 
434 47 309 188 265 
269 431 340 288 311 265 130 
179 11 244 269 469 
38 335 179 432 274 
455 362 269 309 127 357 
126 364 235 104 265 
231 431 340 362 309 349 269 
257 330 108 280 142 
257 383 491 434 22 226 309 62 302 
257 443 462 251 309 456 377 418 
484 261 328 309 257 243 
269 131 340 153 394 336 205 
132 271 29 12 345 191 128 
458 474 428 258 475 438 400 
132 46 129 63 202 319 
206 133 64 257 91 
265 462 134 453 309 59 
179 47 273 152 116 37 187 189 409 
170 133 497 134 127 180 234 68 189 171 
257 368 346 285 353 309 68 
341 146 
257 443 462 251 309 456 383 418 
299 159 22 251 229 
132 63 4 127 257 392 
179 495 379 68 
455 497 340 188 458 131 269 
203 422 72 66 299 129 271 270 191 491 
455 129 46 104 340 362 309 86 199 455 483 
57 458 129 257 263 202 127 316 56 257 43 366 368 
275 113 340 319 189 24 265 
455 104 340 86 199 257 401 462 
347 269 346 62 165 434 202 267 
132 242 11 244 33 
257 169 129 269 497 134 142 68 189 257 91 
132 462 269 446 23 394 29 465 
63 104 134 362 242 
92 22 271 289 28 189 438 102 
458 346 453 309 127 264 
458 287 271 28 336 257 411 
257 195 22 427 144 257 407 
458 250 271 146 336 257 159 336 257 207 
257 255 166 108 414 
458 460 200 40 
455 47 62 391 336 466 
126 22 209 442 53 
84 231 307 309 244 189 257 195 
269 497 127 257 76 434 
63 47 271 354 
458 316 265 263 
179 47 64 257 482 412 205 
257 370 175 235 495 
242 462 134 257 33 309 408 485 
269 346 310 336 257 259 458 129 
63 113 340 314 205 227 458 129 
257 451 447 191 445 456 34 203 422 
269 191 340 257 451 33 
132 275 131 340 311 254 
92 346 271 423 
299 159 22 134 251 324 229 
269 131 340 408 257 298 
455 483 455 202 47 62 357 429 458 129 381 
159 475 171 346 221 22 251 229 
242 462 62 263 265 11 127 226 374 53 458 468 87 
455 351 47 340 276 89 227 
257 70 361 493 
458 129 257 263 373 134 127 316 487 53 
458 462 251 309 127 209 144 252 492 
455 104 340 86 231 129 
257 341 287 271 289 28 268 257 443 
179 47 62 39 393 
455 96 473 269 458 129 
439 120 47 152 163 3 156 
257 159 47 134 152 322 
63 106 474 309 82 242 443 458 129 
10 346 61 157 
265 11 244 33 
458 460 131 134 86 257 330 346 153 
257 465 353 68 156 
63 293 309 305 242 374 260 
455 293 174 27 33 
179 432 134 265 139 434 
458 346 257 494 336 242 393 
132 257 91 129 422 250 271 28 336 257 313 
455 358 351 401 415 269 
455 362 233 309 104 50 
455 483 92 346 62 357 429 455 4 282 269 254 336 174 488 
269 346 453 309 244 184 33 132 455 11 104 269 
265 346 20 455 182 
92 462 271 29 130 
269 346 453 309 121 309 127 
269 346 67 107 
269 11 244 33 458 468 87 
179 209 271 289 28 
185 16 22 163 
132 458 346 474 309 396 
265 11 127 99 381 242 217 
455 273 483 268 269 
46 131 134 408 485 231 129 
246 22 335 209 
460 275 373 47 152 446 
132 269 431 340 177 265 
269 346 453 309 127 62 117 397 
62 302 285 250 271 68 189 438 102 
406 457 214 108 
455 104 340 362 309 244 41 196 33 245 458 129 
438 417 462 134 251 142 
455 104 340 47 62 259 
46 460 47 62 297 429 
257 315 191 357 
104 455 483 455 284 127 264 
269 191 62 50 441 234 286 
231 64 265 387 312 250 88 
241 177 92 151 332 
38 129 179 22 
269 191 62 357 397 
132 231 307 309 104 269 233 130 
62 263 462 251 374 34 
63 151 134 257 166 231 129 
63 47 474 309 411 234 257 424 321 283 129 
257 91 131 134 408 332 28 
493 278 57 108 414 
269 346 310 336 257 259 
458 129 458 131 134 411 309 267 173 
458 129 14 346 265 
455 296 203 174 27 323 424 458 129 
132 265 122 134 121 309 127 45 
493 222 57 497 134 127 142 36 
458 131 47 428 258 
455 131 340 362 309 47 62 259 
63 47 250 62 50 34 
347 265 346 257 443 265 346 50 458 129 
234 84 63 151 257 29 479 
246 490 203 334 192 
269 346 13 42 
63 104 340 47 309 104 265 
458 129 351 408 269 62 71 
234 184 458 191 50 
92 462 271 429 265 63 11 408 485 189 242 
455 131 340 47 196 33 309 483 268 269 
92 191 271 130 455 497 121 
269 175 309 104 415 61 333 
458 495 309 68 189 28 
269 346 134 62 260 63 4 305 415 426 476 
212 434 436 335 
458 175 64 227 482 
265 243 230 127 200 
455 358 319 38 47 62 357 33 
63 104 134 188 269 346 256 111 231 129 
438 409 94 62 217 18 
439 434 47 152 427 
257 476 393 214 353 309 68 
92 122 127 270 37 383 458 129 
269 284 127 227 291 234 286 
383 16 22 128 491 
455 351 362 309 349 269 
257 390 131 423 
63 22 62 50 393 336 400 
455 362 173 309 349 174 119 458 129 
341 133 495 309 68 189 257 91 
12 215 495 309 68 189 257 443 
455 47 309 104 265 458 129 
269 191 271 243 260 
269 131 340 47 309 127 
458 250 351 200 62 166 
271 270 175 394 278 234 265 
257 370 170 250 271 367 68 
455 351 473 309 104 174 310 
257 14 175 62 489 130 309 319 231 129 
62 40 447 94 156 
139 29 491 22 214 356 
132 269 346 41 167 
269 346 72 389 63 106 152 220 189 
428 434 131 340 218 
203 422 62 370 299 495 309 68 
455 474 265 234 62 430 
233 153 191 209 
265 346 288 152 426 224 
84 92 191 62 330 129 197 
257 80 11 127 374 34 
257 91 131 134 153 257 285 
269 191 49 257 297 407 262 257 383 
215 129 377 434 22 491 
455 251 309 319 227 257 130 
269 346 62 366 165 
92 151 460 62 391 336 327 
257 91 175 134 152 209 
265 346 453 309 282 184 414 227 336 242 
265 162 11 244 266 105 
458 129 257 160 162 497 244 418 
132 455 11 127 92 
132 231 191 437 203 257 197 
455 96 473 309 319 172 
347 46 362 269 46 4 48 269 
269 11 47 309 104 
458 129 271 263 175 152 316 189 62 58 160 
63 362 309 349 46 
370 133 497 134 142 127 180 234 68 189 171 
455 104 340 86 265 405 
269 346 152 357 309 184 458 129 
179 351 104 340 483 268 269 
269 122 134 127 257 374 260 269 122 127 374 115 
455 483 179 151 453 309 282 269 231 129 
92 191 271 367 68 56 257 164 109 
92 22 105 458 131 340 372 166 485 309 257 413 
269 346 227 63 106 474 
257 85 131 134 408 233 456 153 
185 215 22 491 
458 353 289 28 
171 11 127 13 281 458 129 
265 346 270 118 455 296 8 309 104 
455 96 362 309 82 458 129 
265 346 257 130 269 284 127 
455 296 134 453 309 2 265 260 
63 104 134 19 265 
38 63 104 340 362 309 104 269 
335 269 191 33 309 319 
455 106 273 249 237 62 118 
132 269 191 62 357 217 
271 270 175 17 13 210 
423 462 453 309 127 322 405 231 129 229 
63 432 453 309 6 309 104 269 458 129 
132 179 356 271 270 
179 22 357 434 458 129 
271 123 191 128 92 
133 497 340 142 127 180 234 68 189 257 91 37 289 28 
383 29 370 133 214 436 
257 465 353 309 68 189 257 263 
257 222 129 383 434 22 163 38 383 22 491 
455 250 62 429 309 472 265 369 
246 195 22 163 53 
45 104 29 136 400 
455 131 340 483 455 202 282 265 337 458 129 
159 151 251 203 257 374 464 105 
63 106 474 62 50 141 264 
57 92 22 271 367 222 336 123 
179 131 340 47 309 
46 351 362 309 104 269 
234 241 269 191 268 101 
242 462 62 50 259 
269 191 62 489 260 
269 191 428 477 316 56 257 81 
383 317 22 491 
455 129 309 244 270 
241 273 372 474 265 337 
458 191 427 229 
269 346 383 446 375 
63 362 309 408 257 165 309 257 341 458 129 
455 288 110 269 202 127 62 67 357 396 
257 433 353 309 68 189 257 91 
257 137 462 107 38 63 47 182 485 309 269 
458 351 307 434 309 24 173 
304 208 175 64 257 222 
455 104 340 483 269 346 62 117 401 
150 462 309 244 485 257 411 242 217 
458 131 134 177 69 257 109 202 160 
265 191 257 437 336 257 447 
63 351 47 309 2 426 260 
63 250 428 50 50 375 
257 29 433 22 
132 199 4 455 177 
257 285 131 134 408 438 153 
214 322 89 229 346 407 
241 151 161 
242 19 462 96 107 458 129 
265 191 257 357 210 458 129 
179 151 134 256 445 360 257 409 
385 87 
132 271 289 28 22 209 
179 250 426 42 
132 63 497 340 320 269 
242 462 62 61 165 
62 215 285 353 309 68 376 309 257 359 326 
458 129 458 191 340 
139 7 475 257 425 364 38 31 
271 123 191 128 176 171 
63 293 309 127 291 
92 346 423 24 265 
257 22 54 309 267 381 53 
271 270 307 309 311 92 
132 179 86 14 131 269 
257 164 175 466 458 129 
458 49 250 270 168 
458 346 250 62 357 217 
63 131 340 362 265 
132 269 191 234 62 430 
458 7 197 309 2 203 257 40 
257 225 462 54 309 384 192 
455 362 309 396 38 455 11 396 487 257 384 458 129 
63 306 257 451 294 336 257 281 38 63 306 257 456 294 336 257 281 
269 191 235 41 442 
92 462 271 157 
132 347 458 431 340 104 438 259 458 358 127 226 254 
257 334 131 134 472 72 367 295 
63 230 311 309 59 242 
179 22 8 309 282 254 336 92 
63 432 246 357 400 
458 11 127 17 234 257 281 
63 104 62 391 336 257 97 275 
257 206 470 169 495 68 
257 465 250 271 68 192 
275 131 340 384 92 
257 368 497 134 127 180 442 156 234 68 
458 131 340 408 438 153 
458 346 288 474 62 429 
269 462 99 309 227 336 426 338 458 129 
269 497 104 269 32 
269 346 62 357 429 234 184 458 129 
347 458 110 269 191 291 269 191 291 
215 131 134 142 68 189 257 123 
257 466 462 43 466 458 129 
422 175 64 269 
179 47 474 428 357 400 
63 86 265 46 432 270 336 286 
179 11 214 267 415 87 
265 346 257 50 118 268 269 
269 346 152 62 489 115 458 129 
383 29 375 22 54 189 171 
92 151 185 105 88 203 257 115 
179 468 286 242 462 257 43 164 
179 151 290 92 462 271 165 
63 151 453 309 267 173 32 
257 383 195 22 427 456 34 
231 200 415 185 448 
271 29 370 164 175 237 62 248 
370 133 47 404 234 438 417 
242 462 62 223 424 
269 191 62 357 217 231 129 
132 458 495 309 177 332 
269 191 62 391 336 311 458 129 
132 203 233 303 269 191 446 
271 33 191 413 234 62 150 407 
257 12 21 36 257 253 
257 12 470 169 250 271 68 189 257 91 
227 185 361 173 
455 250 309 104 265 203 257 236 
458 129 46 86 184 
63 104 340 293 242 
458 202 134 408 28 
63 104 340 483 269 346 62 117 165 458 129 
179 319 309 257 302 
257 467 470 169 495 309 68 189 257 91 
257 88 253 257 88 
132 455 104 340 282 269 
451 159 151 251 442 229 
458 191 134 54 309 2 
231 191 209 475 257 302 456 217 
257 395 462 413 234 171 
266 434 22 128 491 
299 159 251 229 
455 131 134 177 199 455 110 
12 390 57 381 129 179 250 316 271 263 
231 191 351 41 39 234 184 231 129 
151 46 412 317 
269 202 127 13 297 407 242 217 
132 63 22 257 392 393 
458 131 134 177 14 316 257 60 
455 106 474 62 429 
95 91 497 134 127 142 36 
62 263 191 251 156 
104 340 86 458 129 192 
231 250 271 367 91 189 13 102 
92 346 310 336 46 92 458 129 
159 151 251 309 127 322 156 
92 191 45 196 77 
455 191 270 336 493 434 
270 4 134 177 265 458 129 
269 346 257 341 
38 46 106 474 309 82 189 
458 431 340 188 203 205 
84 458 175 257 429 309 177 269 203 334 
179 335 209 173 
458 316 383 448 
212 241 22 491 
265 346 257 49 59 
203 62 130 458 191 291 
265 346 257 49 130 269 497 106 152 
265 191 305 242 260 
257 341 175 495 242 
269 316 143 448 
257 410 57 177 179 151 134 200 
51 133 497 134 127 180 234 68 
458 250 152 427 53 
242 175 152 174 392 115 
257 35 250 152 251 192 
63 106 474 309 282 185 448 475 269 
246 151 83 309 47 436 
63 11 273 86 
458 131 134 68 289 
203 422 92 191 271 367 68 475 257 370 164 109 189 156 
458 191 427 301 
29 133 497 134 142 127 180 234 68 
257 185 16 22 163 242 115 
143 434 86 201 29 
132 269 175 318 271 42 
455 106 474 309 59 
179 151 38 269 462 
257 368 191 251 309 244 485 257 181 32 229 
242 191 351 62 166 
455 60 269 257 10 403 
269 191 438 40 463 336 257 115 
458 353 309 153 257 329 
62 341 285 497 134 127 180 234 68 
151 46 257 215 
309 127 99 458 468 257 359 326 
84 455 47 62 357 429 
299 159 22 134 251 487 192 
423 191 226 475 257 303 
92 191 271 367 68 475 12 133 
63 497 340 188 269 
455 104 134 483 63 293 309 319 9 227 265 
63 4 273 127 24 63 22 
455 483 265 462 199 63 474 
269 431 340 311 234 286 
257 283 303 131 134 142 65 62 60 234 68 268 257 59 203 278 
164 133 250 271 367 68 
63 113 340 59 265 
377 434 151 163 
269 191 270 118 63 4 104 
458 351 497 340 282 453 
458 497 127 254 234 212 375 
458 436 324 458 474 270 
132 242 191 64 205 
269 346 24 257 406 137 458 129 
257 425 364 175 160 412 265 295 
458 214 209 205 309 87 
62 464 434 474 269 
63 151 13 172 164 
257 456 452 343 191 456 217 
185 195 47 152 116 203 257 207 
242 462 351 156 231 129 
455 131 340 86 455 250 
62 35 462 251 
455 497 134 104 265 
257 410 131 134 142 68 189 257 253 
30 407 191 54 234 156 
257 407 191 251 309 244 378 324 229 
383 120 22 228 257 491 
458 335 413 485 438 27 51 
265 91 462 251 324 257 419 
455 316 62 263 309 319 234 269 
257 21 431 134 47 320 92 
63 22 49 317 458 129 
179 151 214 228 257 456 
265 346 257 49 130 46 4 282 414 269 
347 455 131 340 24 269 455 202 6 32 
132 46 362 309 104 257 311 
269 346 134 265 130 84 
466 191 134 257 181 
179 104 340 86 199 346 453 189 
408 286 197 426 459 
45 231 462 460 62 310 336 438 210 
242 33 63 47 309 104 269 
179 22 437 203 257 211 
62 35 191 251 301 
383 195 22 427 
455 296 453 309 244 269 309 173 
423 462 382 458 129 
185 120 22 214 163 
132 347 455 293 269 455 296 453 309 244 269 
63 483 63 131 265 
269 11 89 257 384 336 242 115 
455 250 309 319 234 62 305 
347 63 305 257 395 439 375 63 4 244 257 78 
464 241 349 269 265 130 
257 491 22 383 195 
451 159 22 251 301 
257 141 161 309 6 32 192 
458 131 134 153 257 393 
29 222 129 272 250 152 209 
269 346 351 257 291 118 309 104 
269 346 134 257 97 
132 179 432 96 96 357 
475 174 310 455 2 62 50 397 
370 133 381 64 257 91 
458 54 62 350 225 234 53 
257 467 137 462 486 
269 4 127 257 97 
257 35 462 54 234 376 
455 103 63 4 104 269 
63 351 362 205 309 55 
179 113 340 244 269 458 129 
231 131 340 282 270 
257 165 462 134 496 
231 495 309 408 233 456 153 
132 29 133 129 271 263 175 344 152 316 
63 104 340 362 205 309 47 205 
377 440 131 134 86 
227 493 275 258 
455 188 455 104 362 269 231 129 
458 175 45 196 333 
45 63 104 293 309 127 446 
46 104 340 86 458 129 
455 47 423 412 257 81 
132 347 269 346 134 291 455 47 62 50 259 
257 120 437 197 
455 131 340 86 199 191 453 189 
151 309 127 182 171 
381 458 36 269 250 152 180 
231 288 175 152 
242 462 257 11 336 257 277 458 129 
455 104 340 362 309 349 233 32 
242 115 269 373 127 446 
455 483 455 293 428 33 
458 250 271 29 28 268 233 
455 47 309 319 197 458 129 
458 278 72 160 
229 346 141 191 257 451 309 319 189 409 
46 113 340 59 493 275 
269 183 62 489 33 458 129 
72 299 129 89 257 33 257 330 250 79 309 349 277 10 
46 47 309 305 231 129 
38 231 346 453 39 
455 483 257 411 11 311 
84 455 86 455 4 305 
458 131 340 408 332 28 
179 49 306 270 260 
132 455 284 340 47 129 265 
455 47 257 291 458 468 87 381 
63 432 134 453 309 420 173 458 129 
132 100 458 346 257 81 458 346 134 251 309 244 105 245 
269 346 62 118 336 257 236 
458 495 309 68 189 257 459 80 
458 497 314 485 415 257 392 336 205 
458 346 134 453 309 197 280 
265 202 125 348 309 123 
43 302 133 129 383 434 22 163 
390 131 134 417 438 153 
269 346 134 24 265 458 129 
63 22 198 309 104 199 63 473 
132 455 110 179 202 127 
455 250 273 249 205 324 231 129 
439 241 22 427 190 
257 61 263 230 84 127 226 
63 358 408 269 309 205 
257 393 353 289 68 
179 131 340 408 289 28 
133 92 497 134 142 127 180 234 68 
242 462 257 117 270 458 129 
265 462 134 62 210 
455 131 340 362 309 104 269 
46 432 257 416 84 
63 432 134 351 400 
265 202 127 357 
332 343 191 128 301 
38 458 129 455 483 63 4 104 265 
46 113 340 177 265 
347 455 296 134 270 336 205 455 296 134 270 336 205 
269 191 233 297 463 336 257 281 
269 346 49 152 377 105 
92 191 271 299 68 475 390 
13 160 191 361 456 122 
269 346 134 24 458 346 134 453 309 282 269 
257 162 497 244 485 309 62 115 
455 104 340 483 179 11 
455 202 24 309 86 
138 390 353 309 417 289 28 
269 346 100 92 346 62 165 
63 151 453 309 305 242 118 
57 271 247 191 322 
132 269 191 62 315 
271 123 191 128 53 
271 158 175 306 257 370 486 3 335 
455 103 458 4 472 269 
92 462 62 452 165 231 129 
257 416 51 175 270 
455 473 309 71 308 257 424 168 132 269 202 134 311 458 129 
92 462 103 234 286 
132 126 129 269 191 62 315 
335 7 257 496 154 66 
38 455 483 458 11 
387 312 497 134 127 180 234 68 376 
458 497 134 127 180 234 68 405 
92 191 271 367 341 68 
455 103 45 132 269 346 62 489 115 
179 106 273 152 203 265 325 324 38 265 358 127 446 234 205 
155 346 191 62 50 270 
265 141 131 134 65 62 60 234 68 
63 106 413 46 223 
92 191 271 367 68 475 257 341 
455 103 309 47 62 357 294 231 129 
63 47 271 68 
257 253 22 228 266 53 
257 80 22 251 309 121 414 374 217 
385 28 22 134 316 398 
257 170 250 271 68 
269 462 62 50 393 415 50 400 458 129 
455 358 86 199 455 293 
215 47 353 309 68 189 257 443 
231 353 289 68 192 
95 91 462 134 251 487 442 374 115 
458 287 271 289 28 268 257 401 
63 86 63 4 305 92 458 129 
434 151 453 415 199 179 86 
257 42 336 253 175 353 
132 271 345 191 226 189 265 53 
265 346 257 263 179 47 309 472 458 129 
455 104 340 362 351 270 118 
231 193 309 65 309 422 
246 129 179 131 269 451 
63 104 340 47 107 61 327 
179 131 423 458 129 
242 462 419 281 
132 241 151 340 
84 458 358 6 309 104 269 32 
470 169 133 250 271 68 
84 63 103 309 244 257 321 172 
370 133 497 134 142 127 180 234 68 156 
458 353 68 301 
426 224 462 463 
231 353 309 68 229 
231 307 309 127 257 392 
132 92 191 481 247 415 257 263 265 257 375 284 319 189 
189 53 458 250 30 429 
84 458 471 340 47 309 
458 250 271 29 28 38 131 134 408 438 153 
257 80 151 251 309 244 105 
455 106 152 468 62 391 336 275 56 62 391 336 434 
271 29 375 22 54 
269 346 257 291 118 309 104 458 129 
455 358 35 234 173 
269 11 372 197 254 
455 188 455 4 104 269 
455 362 309 348 257 130 
275 151 446 84 
455 293 428 105 309 483 268 269 458 129 
269 346 62 101 263 
265 346 227 455 296 290 
455 47 309 244 242 24 62 330 
45 231 346 227 275 
14 346 257 126 107 203 242 118 
132 347 455 113 340 104 269 455 113 340 104 269 
231 351 182 62 50 397 
455 483 62 464 241 47 
126 250 152 209 56 53 
257 90 202 134 417 289 146 
63 4 134 121 203 242 130 
257 215 109 214 353 309 68 
458 250 134 152 116 
186 215 250 271 367 68 
269 346 152 62 357 263 56 246 336 286 
312 336 257 220 141 497 134 127 142 180 234 68 
458 468 62 350 225 
132 92 346 288 374 281 
257 80 214 331 444 208 38 1 
233 409 462 453 189 
455 483 63 202 47 250 62 437 89 269 
179 432 453 280 234 357 
63 373 134 24 269 132 63 47 309 401 415 269 
38 428 11 24 269 38 428 471 340 24 269 
265 462 227 458 129 
57 265 462 134 257 181 
179 104 257 97 118 
323 462 88 309 429 
92 462 357 350 
63 351 104 340 86 14 179 151 
455 250 117 327 
370 133 177 265 35 497 218 240 176 240 301 
63 111 309 47 257 392 
92 346 423 96 395 
455 483 269 346 257 294 458 129 
46 362 309 314 189 453 
233 102 191 340 128 
28 22 134 318 
132 242 462 257 370 486 
92 346 423 46 4 104 268 269 
458 346 218 309 282 46 
92 47 152 402 253 324 
92 346 271 33 231 129 
143 151 357 434 
265 346 257 118 46 4 177 264 
257 456 270 7 189 397 369 
179 104 340 362 309 319 309 243 
133 36 257 222 
257 29 397 462 41 337 309 60 
269 214 52 428 241 309 319 309 40 329 
269 462 134 257 451 33 257 393 175 218 485 412 61 327 
383 169 133 47 152 427 
257 341 131 265 234 286 
179 22 209 456 217 
132 269 346 134 257 97 
458 214 129 92 22 271 278 309 60 245 257 260 
179 47 152 361 56 257 341 
179 22 125 309 127 209 381 192 
265 175 152 187 245 487 381 
455 131 340 86 455 497 104 265 
269 191 52 309 319 189 95 130 
257 338 230 218 451 
63 11 273 305 458 129 
269 214 495 68 189 376 
257 383 22 413 309 267 374 217 
63 110 265 191 62 391 336 466 231 204 
46 273 349 173 132 46 86 458 346 152 92 
269 346 288 257 97 118 458 129 
455 296 8 309 314 174 211 167 
231 175 134 318 28 
63 214 110 336 354 
46 351 47 309 349 269 414 
458 431 340 293 269 
269 287 271 29 367 28 
242 462 426 338 458 204 
179 151 310 336 257 165 
455 104 340 362 394 332 243 
269 346 469 252 492 
38 84 269 307 257 370 341 309 104 257 97 
269 250 271 289 28 
265 11 127 257 456 33 
38 458 346 62 50 494 
341 133 497 134 127 142 180 234 68 
46 106 316 466 
265 346 199 458 110 
458 129 458 473 309 349 159 451 
63 188 179 11 
458 175 64 265 394 207 191 161 
46 351 104 340 86 189 199 441 
21 133 250 271 367 68 189 257 215 44 
257 409 462 54 309 384 374 34 
38 265 346 89 257 384 336 257 217 
455 273 129 455 191 273 453 309 2 32 
63 106 474 62 50 393 
265 346 62 263 234 241 309 472 
269 346 152 62 50 217 
458 129 458 131 134 483 92 202 127 62 370 207 189 438 338 
455 96 188 179 11 
269 161 30 407 229 
132 63 86 14 63 151 
455 131 340 282 145 458 129 
438 409 175 134 152 413 
395 159 22 134 251 487 171 
257 35 11 127 445 442 171 
257 456 191 272 492 18 
455 497 340 401 415 62 81 231 129 
455 182 38 63 17 
62 283 303 299 214 36 257 401 442 192 
347 63 131 340 305 203 257 451 447 63 358 305 203 257 297 458 129 
179 246 151 214 312 336 150 
63 362 309 104 257 291 118 264 
46 4 134 104 423 268 269 
269 462 134 62 357 378 309 71 458 129 
393 133 128 53 
242 284 134 47 152 52 
351 131 340 483 336 269 
63 151 8 309 472 269 
227 455 362 309 104 462 174 259 
63 47 270 1 38 63 230 127 425 
38 92 151 29 275 
63 106 163 62 391 336 13 434 
132 179 358 244 269 
63 49 362 62 338 265 214 307 286 
242 462 257 248 336 257 164 458 129 
458 129 203 62 477 
257 146 497 134 127 142 36 415 29 341 133 
480 202 273 127 257 97 
63 11 396 205 227 
63 284 408 269 62 6 
231 202 134 417 394 28 
269 346 72 449 223 420 181 
63 358 408 269 426 392 437 
455 356 30 259 
455 483 265 346 357 
458 175 134 129 69 458 11 71 234 277 
179 47 340 356 269 132 179 177 269 351 175 309 127 92 
334 133 353 309 68 189 257 91 
63 47 62 489 130 309 319 458 73 
265 466 122 84 127 17 
257 91 214 131 134 153 62 298 
63 202 103 309 314 269 254 336 334 458 129 
458 129 271 263 175 152 316 
242 191 340 426 44 458 129 
455 473 309 177 265 38 455 473 309 177 265 309 173 
269 11 408 103 309 257 389 452 129 
63 47 340 17 103 
242 191 129 203 257 407 
257 281 346 489 
13 259 84 462 2 
132 291 84 458 175 309 408 265 309 286 
92 346 271 489 281 84 
46 113 340 2 269 280 
92 462 423 88 
458 129 458 497 134 68 289 
347 455 497 104 269 32 455 202 166 485 458 129 
84 455 6 309 408 269 197 
265 346 134 257 130 234 62 330 309 319 203 257 170 
271 270 404 197 
257 21 57 129 271 270 191 88 
257 328 307 176 221 
455 113 340 104 242 405 
159 202 127 322 381 242 34 
179 131 38 460 104 
179 250 464 29 28 
242 284 244 378 324 257 384 336 257 115 
164 215 250 271 68 189 257 91 
269 191 134 220 458 129 
46 27 257 291 309 48 269 
455 19 434 14 19 184 
63 86 14 63 151 
455 288 188 265 
234 257 416 455 4 349 257 82 179 316 
63 86 458 358 127 197 
92 191 271 367 146 189 69 179 22 209 
455 104 340 86 257 392 130 309 104 269 
458 57 353 309 408 332 28 
76 133 497 340 142 127 180 234 68 
257 341 131 134 68 189 438 450 
257 395 447 462 171 
242 462 426 496 277 
171 346 419 191 41 337 309 60 
215 202 134 68 189 257 207 
269 96 202 127 
269 11 127 257 456 33 
257 165 462 257 137 
458 473 31 309 47 459 
62 465 285 250 271 68 
133 250 271 68 
72 176 263 462 134 251 
38 234 62 430 231 131 
203 265 389 458 462 240 357 240 179 218 
269 131 340 311 254 234 184 
4 231 314 269 485 
458 131 340 288 305 
455 103 265 459 11 
171 191 332 336 257 97 
38 265 346 134 357 
464 188 265 466 11 127 356 
63 432 220 309 104 269 
63 358 244 242 378 197 
179 113 340 319 172 
179 214 311 203 139 29 329 
458 191 427 189 171 
38 428 151 256 163 
132 269 191 62 50 50 217 
133 495 309 68 189 438 417 
147 462 199 46 362 
383 241 388 309 302 
257 91 497 134 142 127 36 
242 462 134 426 311 
179 104 340 86 173 344 
30 183 438 378 
265 346 134 426 101 
38 101 175 152 357 
265 35 462 413 234 171 
455 483 269 431 258 
458 191 72 107 330 14 131 357 275 
269 346 273 453 309 127 257 97 
257 374 270 191 357 
257 377 47 134 152 116 
132 265 191 438 456 369 
242 462 257 297 91 
455 79 173 309 258 184 
257 390 495 309 408 394 28 
269 373 127 257 49 429 458 175 
257 302 202 134 417 394 29 28 
458 495 309 68 144 257 295 
38 347 455 191 340 453 309 282 9 257 260 46 351 113 340 258 265 
215 250 271 289 146 
269 386 257 399 240 290 
455 362 173 309 2 
257 80 151 251 309 456 439 105 
269 122 134 127 257 395 159 
257 470 169 64 257 91 
257 400 47 152 116 
257 439 22 427 53 
92 11 127 30 357 81 
257 118 462 309 305 257 107 375 38 63 131 265 
271 295 191 251 324 374 217 
179 432 62 395 439 393 
269 191 438 297 424 321 463 336 257 281 
458 284 47 152 124 264 
455 497 340 188 269 231 129 
350 222 129 257 263 202 127 316 56 192 
179 131 134 362 309 472 265 146 398 
84 46 113 340 104 265 
434 475 496 114 131 340 218 
38 265 462 174 40 369 
84 231 462 271 332 
269 122 134 127 469 
63 362 309 127 310 336 265 162 458 129 
179 471 340 47 309 
269 346 357 309 127 197 231 129 
92 151 62 464 275 46 4 104 
62 35 462 413 234 381 242 115 
269 287 271 28 336 257 80 
38 455 47 62 39 496 114 168 
438 387 462 415 173 
455 497 340 244 269 
84 179 86 179 106 474 103 
257 221 151 251 381 242 115 
46 6 134 309 483 268 269 
12 133 495 309 68 189 257 91 
275 151 453 50 
179 362 257 90 346 333 309 127 413 203 248 
179 131 134 417 233 153 
132 202 179 6 
269 346 134 24 455 296 134 8 254 92 
434 48 205 347 179 151 198 
269 346 426 338 38 63 106 474 309 305 269 234 205 
159 22 134 251 487 229 
458 358 127 264 234 286 
257 16 22 134 427 
257 21 175 226 271 345 203 257 443 
246 329 47 366 221 203 62 115 
266 434 214 22 491 
242 462 257 451 441 
271 455 131 340 349 205 
265 462 251 309 244 266 418 
455 104 340 483 265 346 372 310 336 269 291 84 231 129 
133 495 309 68 487 144 257 91 191 209 
84 458 346 270 336 257 392 
208 393 343 
458 462 134 24 29 400 
13 90 175 152 382 
257 330 346 153 191 134 209 
459 462 426 291 
269 191 24 72 27 224 
242 462 62 50 141 
92 462 423 309 19 205 
92 191 271 367 295 56 257 334 
132 458 250 340 318 485 103 
257 424 462 447 
49 439 400 47 332 
265 263 497 218 301 
455 104 340 24 123 
231 346 453 309 145 269 
370 133 129 257 407 191 413 234 171 
132 46 151 453 309 47 309 311 89 269 
242 325 462 271 446 
439 241 22 273 356 
179 106 288 474 13 27 130 
265 346 257 49 130 46 151 453 309 305 242 321 
38 455 47 227 257 19 455 293 309 258 184 282 414 242 
63 106 316 426 443 189 199 63 188 
92 96 462 340 237 62 118 
269 346 62 96 357 33 
257 91 287 271 28 
269 462 41 176 309 86 
269 346 62 489 281 231 129 
455 351 24 256 264 458 129 
203 255 257 51 462 257 164 
231 202 47 436 
92 191 271 367 263 69 257 294 11 127 71 229 
139 218 475 29 364 
455 47 62 391 336 278 
63 104 340 86 344 
455 191 453 309 166 269 309 173 
275 22 273 257 97 32 
269 346 234 174 481 
269 191 62 260 455 110 455 497 305 
92 11 127 271 384 
265 346 134 257 165 84 
95 153 191 134 99 
458 175 257 28 
215 133 497 134 127 180 234 68 442 376 
265 202 59 257 424 
231 191 427 442 156 
428 434 4 401 415 269 38 428 434 113 340 
63 131 340 47 309 104 265 
46 284 134 319 9 242 309 472 466 458 129 
265 466 497 127 17 84 
38 92 22 62 464 336 493 
405 179 47 271 341 38 271 248 
28 22 309 127 322 381 
455 362 173 309 127 163 231 129 
351 218 38 2 
63 474 205 309 2 
246 47 353 309 68 
265 191 227 310 336 269 
269 346 134 310 336 13 259 
132 458 4 134 104 246 
63 362 242 309 314 453 
179 362 62 429 309 166 179 4 472 242 291 
271 270 473 309 472 269 
266 434 22 226 309 62 302 
63 432 134 24 143 195 
179 209 257 461 456 34 
38 265 462 257 392 63 4 104 
395 159 22 134 251 487 405 
63 104 340 47 221 458 129 
132 265 11 218 254 
257 341 175 134 129 199 482 179 11 119 
257 51 175 134 152 198 309 153 62 496 494 
480 204 458 462 340 467 
458 41 353 68 
275 151 257 130 179 151 
38 46 284 267 257 434 
271 29 194 22 491 
246 47 64 257 482 
379 265 310 336 269 63 202 134 127 198 309 104 257 401 
379 354 92 462 423 458 129 
334 133 47 495 309 68 189 257 295 
265 346 257 117 350 
265 462 62 489 33 
455 103 243 11 134 218 
63 104 340 86 132 269 346 270 260 
132 179 4 273 86 265 
63 432 453 309 104 62 357 259 
46 351 362 309 86 
383 120 22 163 38 270 191 491 
63 351 104 340 483 265 346 257 118 309 104 458 129 
150 11 273 127 257 97 32 
265 346 199 455 188 
269 131 340 47 309 311 254 242 130 
63 151 134 264 309 187 205 254 336 62 259 
63 104 340 293 271 277 
132 269 287 271 29 28 
269 346 453 309 127 62 391 336 434 
269 346 62 357 378 234 184 
92 47 152 327 
455 296 453 309 408 269 62 6 
62 465 285 353 309 68 
179 125 202 47 145 269 245 
269 497 104 242 291 84 
265 346 257 130 455 24 269 
458 230 319 231 129 
395 159 22 251 192 
458 356 179 131 134 
92 191 271 367 370 170 68 
347 269 462 453 189 269 284 340 127 
458 131 340 362 309 104 242 
38 231 175 340 306 394 336 205 
269 11 127 438 40 25 309 257 425 364 242 115 
269 191 41 442 309 82 
265 191 67 107 
179 358 293 309 127 89 13 392 234 13 395 439 375 
455 104 340 472 205 
269 287 184 62 429 309 314 220 189 174 260 
46 47 309 207 
458 214 129 458 202 160 
458 129 458 202 71 32 
179 47 309 417 173 142 
257 178 346 451 248 
92 11 273 127 459 
132 269 191 340 351 62 51 
455 96 104 340 483 268 269 89 227 458 129 
265 346 199 458 129 
455 483 265 462 257 443 
458 131 134 48 205 
63 351 47 45 196 19 475 227 336 205 
377 434 22 437 309 450 
179 4 460 218 
179 47 340 382 269 254 
455 104 340 293 309 48 265 
92 346 423 63 497 104 
43 133 497 134 142 127 180 234 68 
257 126 107 118 462 265 434 230 35 458 129 
38 269 131 340 244 489 
455 483 63 47 62 429 309 305 269 374 115 
179 22 453 309 311 
179 497 349 205 
46 104 340 47 309 104 242 
269 346 271 117 401 458 129 
38 479 462 310 336 257 354 336 257 425 364 
179 351 497 340 104 265 
242 191 62 50 305 
38 455 473 309 187 265 254 
269 346 310 336 257 260 
185 120 22 491 
455 473 332 231 129 
132 63 316 269 309 257 384 
179 151 134 220 
132 63 358 273 86 
227 22 209 475 257 302 
231 307 309 305 257 186 486 
216 221 11 127 445 381 
242 462 134 357 146 234 233 234 242 281 
269 462 62 67 107 310 336 174 210 458 204 
242 462 134 62 210 
455 202 24 309 47 332 
269 129 265 202 331 
45 269 191 280 309 257 81 
458 131 340 153 394 329 
92 346 271 21 37 215 92 
269 183 439 492 
455 96 113 340 188 269 
132 265 191 335 38 242 462 84 
132 269 346 288 152 24 265 
257 417 462 257 417 458 129 
84 462 257 33 309 48 269 
458 250 182 438 456 299 397 383 492 190 
201 443 462 446 458 129 
242 462 453 309 127 62 243 
455 483 458 431 62 357 259 154 129 
383 434 22 491 203 257 396 
201 380 338 175 270 35 
269 346 134 54 309 127 209 487 374 115 
144 265 455 104 340 86 62 391 268 173 
451 159 22 251 53 
84 458 346 355 62 494 
455 483 269 346 453 309 244 428 33 
335 63 11 319 234 463 
269 346 134 257 451 260 63 106 17 242 281 
271 400 22 491 
133 495 68 
458 131 134 86 257 434 14 436 
246 195 436 176 171 
63 287 205 62 50 166 
63 358 282 269 453 
455 351 104 340 86 458 129 
38 265 346 351 210 
455 86 455 4 305 264 
63 104 340 86 199 462 453 189 
132 458 353 309 417 28 336 257 247 
458 131 340 86 143 434 
265 230 134 127 52 
458 191 209 185 105 381 
265 346 134 174 259 458 129 
298 22 453 485 301 
265 202 127 62 424 168 
271 247 175 152 180 
289 482 151 58 
63 293 332 28 
100 479 191 67 39 
269 462 134 453 309 127 382 
159 22 134 251 324 301 
455 131 340 362 269 309 384 
132 455 104 340 86 265 344 
455 104 340 483 268 438 236 
132 179 293 242 
242 462 62 243 412 227 336 286 458 129 
458 353 309 68 289 
84 458 373 47 257 392 270 
132 265 122 127 62 357 118 
257 370 164 109 214 250 271 367 146 
257 465 316 271 68 
156 346 263 129 269 191 
104 179 47 62 443 
257 456 397 191 134 182 
132 92 462 62 489 130 309 319 
458 131 134 142 68 405 
215 202 134 68 189 257 91 
63 104 340 362 265 
455 358 282 173 197 
242 281 131 340 319 257 130 269 284 47 458 129 
347 46 113 340 305 203 255 46 113 340 305 203 257 425 364 
231 436 377 105 381 
132 210 462 265 130 
257 44 91 175 134 152 316 398 
265 346 199 455 24 
63 47 340 250 394 327 
63 86 269 346 257 97 260 
269 462 54 309 127 209 374 115 
231 191 52 309 35 
63 250 340 17 62 260 
257 416 462 257 416 458 129 
455 188 242 462 174 378 
269 287 271 28 
192 191 271 446 
257 392 33 462 84 458 129 
383 29 195 22 214 163 
265 346 310 336 210 
484 284 86 
335 46 4 315 469 
269 131 340 244 173 489 
132 269 346 351 270 336 493 275 
242 462 62 140 265 346 189 257 82 
302 133 129 179 22 79 56 387 134 309 408 28 268 438 102 
265 346 310 336 174 259 458 129 
63 104 340 293 233 
92 346 271 293 234 269 
189 156 458 129 458 202 134 71 
455 11 47 309 71 144 257 424 168 
455 191 67 337 309 62 50 447 458 129 
335 257 76 166 94 
242 462 134 453 300 
246 222 497 134 142 127 36 
179 47 62 391 336 357 400 
269 191 316 398 56 257 112 
455 86 265 346 67 107 
257 425 364 175 257 291 309 160 257 263 
257 277 346 90 129 269 250 271 68 
63 358 282 269 197 458 129 
455 296 134 257 270 14 316 257 68 
455 293 257 466 458 129 
179 250 311 309 104 
231 191 209 456 217 
269 175 17 466 234 257 272 236 492 
458 351 175 62 357 33 
452 131 134 408 367 28 
455 104 340 483 458 202 24 265 
231 388 271 289 
455 104 340 483 92 11 127 394 452 327 
458 191 134 491 
51 312 57 129 231 202 134 48 269 
238 420 
126 11 273 86 269 
84 455 362 309 86 332 
179 22 233 49 448 336 257 260 
272 434 22 163 
335 63 17 246 375 
179 483 269 346 62 391 336 466 
92 191 271 367 370 477 
455 483 269 346 62 67 357 48 336 398 466 458 129 
63 151 62 170 75 
63 432 264 309 305 
257 91 287 271 332 146 
271 237 263 175 344 152 316 
269 431 340 311 264 
302 133 129 439 434 22 163 
240 489 240 455 4 258 455 296 453 309 258 458 129 
231 468 184 231 202 349 184 32 
257 401 191 251 309 127 322 53 
231 191 209 144 257 295 
206 133 64 493 222 
38 455 11 47 265 258 
257 470 90 353 309 408 28 
271 90 129 269 191 340 
199 462 92 309 177 
458 131 340 408 289 28 
284 179 314 269 
455 104 340 362 309 47 309 145 265 437 
458 497 335 244 438 466 38 71 
458 462 343 257 82 
458 175 62 357 416 
458 11 25 246 329 53 
370 133 353 68 
215 287 271 289 28 
31 346 476 169 353 309 68 189 257 91 
143 434 151 220 234 184 
257 383 16 151 134 
269 388 189 227 281 489 
132 458 131 340 104 394 311 
269 346 423 458 468 87 
455 86 455 296 62 357 310 336 257 393 
455 131 340 188 173 
231 462 340 38 231 431 340 
62 395 263 191 251 374 115 
269 497 127 322 240 176 240 376 
84 179 104 340 47 309 408 265 485 
455 483 434 251 173 309 305 
92 346 271 29 130 309 187 269 
455 351 47 309 401 415 269 
257 330 129 458 497 
455 104 134 188 203 123 458 73 
92 151 62 391 336 357 400 264 
271 237 482 47 152 316 
455 202 47 251 332 
257 334 193 192 309 244 257 443 
179 17 439 336 205 
132 269 202 127 357 350 
179 47 62 489 130 309 319 
370 133 497 134 127 180 234 68 376 
38 269 346 174 416 
179 353 309 408 394 289 28 336 257 25 
192 462 62 446 260 38 63 358 6 309 305 265 270 
257 164 109 36 13 25 
377 434 47 436 3 192 
269 191 24 92 191 62 59 336 210 231 129 
179 22 371 13 451 321 
132 63 432 134 453 309 127 62 165 
455 483 63 131 199 191 392 
92 191 271 367 12 170 68 
455 129 455 296 134 453 309 104 265 
265 346 351 310 336 269 
458 436 383 492 381 
4 63 104 269 405 
242 462 257 456 270 
46 113 340 244 62 441 245 
269 346 62 357 118 
257 434 273 408 485 
92 191 271 367 68 475 257 206 341 
455 358 6 309 472 257 126 336 269 
242 4 134 319 189 
458 131 134 408 394 28 336 199 373 127 203 269 
257 21 129 257 43 250 124 309 207 120 
269 250 152 237 62 489 33 
227 141 62 375 151 256 182 203 480 
351 408 286 62 429 
269 462 58 347 275 121 309 319 257 130 179 47 152 453 
455 131 340 177 455 191 134 453 309 71 
132 458 473 309 55 269 
46 47 309 127 92 
458 131 134 2 203 376 346 397 
63 362 309 305 269 458 129 
242 33 231 250 377 397 448 
405 462 271 446 
31 250 271 68 
132 242 11 134 127 234 489 
269 346 134 24 458 306 
458 129 271 263 250 152 316 189 69 309 160 
132 265 346 49 310 336 257 165 
257 330 202 134 408 438 153 
383 241 22 427 
257 74 129 203 62 477 
269 129 28 336 438 417 22 134 99 
455 182 174 27 260 
132 40 191 357 
458 84 175 438 429 
455 47 309 311 189 174 260 458 129 
30 330 191 491 
242 462 397 2 
455 110 458 191 453 309 218 254 336 269 
46 4 349 269 475 257 42 336 434 14 108 37 388 254 
458 88 265 259 456 34 309 71 234 277 
76 15 230 127 254 336 257 338 56 265 33 
63 47 271 29 378 
92 22 271 327 458 129 
242 44 471 340 127 486 309 257 398 
63 106 474 309 319 485 242 115 
132 265 346 374 34 
269 191 134 274 69 257 164 202 160 257 263 
92 462 271 130 46 4 60 265 
269 346 50 231 129 
269 346 351 270 336 493 275 458 431 227 257 33 
63 358 2 309 305 
458 182 62 50 260 
179 193 309 6 
257 330 431 47 62 369 
458 131 340 408 485 62 145 144 257 297 
269 346 62 50 315 234 257 393 
428 151 197 234 257 297 37 40 33 
439 492 18 458 191 257 81 
265 346 199 46 362 
347 455 296 134 455 296 134 
458 436 439 105 381 
479 175 64 257 482 
57 257 341 64 257 91 
242 462 469 458 129 
63 47 218 62 489 130 458 129 
455 191 372 220 254 3 257 384 336 257 281 
453 300 455 4 104 269 
38 455 202 340 362 309 104 265 
179 22 92 309 166 119 458 129 
132 455 104 340 483 269 11 127 24 257 236 
132 455 104 340 86 438 153 
455 104 340 483 269 346 394 117 401 
257 395 11 127 445 171 
257 120 110 179 22 410 
269 11 127 13 297 407 
179 351 86 265 179 351 362 309 35 
269 250 309 127 242 130 458 129 
46 113 340 75 184 
455 96 104 340 483 242 462 62 117 401 
132 179 349 269 240 62 357 118 
203 383 492 221 11 127 445 
62 341 285 497 134 127 142 180 234 68 
242 462 134 62 337 60 
271 289 146 191 128 
80 22 251 309 121 229 
455 202 340 372 47 309 472 62 82 144 265 
92 462 340 62 165 
257 263 497 218 240 176 240 53 
242 115 179 151 257 97 217 
231 353 309 153 14 202 127 203 257 141 
257 400 483 179 47 269 
458 250 271 398 68 192 
38 455 104 340 362 309 177 455 183 320 
170 133 47 209 464 28 336 257 443 
455 362 309 319 197 458 129 
257 313 462 486 309 227 
63 47 271 168 336 205 
347 455 17 265 19 265 202 127 446 458 129 
257 35 462 251 381 242 115 
269 191 251 309 65 309 484 189 53 
46 373 177 265 458 129 
265 346 199 63 362 
458 129 46 432 291 
179 497 47 88 257 389 
257 393 306 246 375 
458 214 404 234 
132 458 353 309 408 332 28 
455 104 340 293 466 
455 113 340 188 29 400 104 340 104 257 97 
10 14 175 134 152 116 175 64 269 
92 191 340 62 117 165 231 129 
273 129 455 191 340 
63 106 474 309 314 220 189 269 
132 257 107 118 462 309 305 257 321 
269 346 62 297 429 
493 22 257 105 
269 346 62 137 494 
458 351 131 340 47 269 405 
63 131 340 104 265 
458 462 214 54 309 25 444 208 
257 466 462 50 
455 351 362 309 127 404 62 74 
265 346 20 257 166 94 
132 265 191 62 217 18 
63 188 63 151 67 337 415 29 329 458 129 
92 191 271 29 146 
455 104 340 188 458 462 
257 341 353 309 68 
63 104 257 97 118 38 269 346 404 
63 129 63 471 340 104 269 
63 47 72 239 
46 235 86 199 269 462 
63 104 134 362 309 47 62 297 35 
434 104 340 483 269 346 62 165 
132 455 296 453 309 472 269 
92 151 271 215 
4 46 188 46 131 269 
257 392 462 460 309 127 
458 353 309 472 62 477 229 324 257 70 
132 63 11 104 426 392 
231 96 250 340 
458 129 212 241 250 152 427 190 
455 113 340 282 9 265 
269 191 62 357 305 309 282 
132 269 497 134 127 36 
455 351 131 340 362 309 127 92 458 129 
455 202 104 257 97 118 32 
269 462 134 412 31 458 129 
53 346 263 191 251 
242 462 227 455 106 474 
38 458 307 271 310 336 265 
92 22 271 28 336 257 247 
132 458 122 134 282 257 429 
265 11 127 257 384 336 265 
455 473 309 127 277 
57 275 122 59 324 374 115 
269 131 134 177 14 202 187 485 257 466 
383 22 128 309 127 491 
132 291 84 257 126 107 118 462 257 424 321 
458 307 309 305 38 455 362 309 305 
38 231 373 127 291 
257 77 436 254 189 95 27 
458 214 474 438 451 145 336 257 281 38 276 438 451 71 
46 351 483 268 269 
63 131 340 362 309 349 438 119 231 129 
458 191 198 309 121 
269 462 33 63 282 372 
199 191 257 165 
63 362 309 55 269 458 129 
257 425 342 64 257 482 
487 257 395 447 257 396 191 337 
179 351 104 340 311 
257 186 476 169 285 353 309 68 
84 63 106 474 62 297 210 
257 334 129 269 202 181 62 295 156 
265 346 134 24 184 
132 458 204 237 222 151 464 
271 270 462 453 309 244 269 300 475 184 
132 458 388 271 289 
455 351 103 458 11 127 227 291 
455 47 99 173 234 62 489 33 
383 370 133 353 309 68 142 
257 424 462 425 412 173 
455 296 134 453 309 127 92 62 34 458 129 
38 179 86 265 
257 328 175 273 445 333 
231 495 309 408 28 336 257 80 
63 84 47 309 314 453 
455 296 134 290 63 151 257 392 393 203 257 424 458 73 
63 460 188 63 432 62 357 393 458 129 
455 351 6 309 2 257 97 
455 483 269 346 41 176 309 70 458 129 
269 191 340 62 441 455 473 309 47 
434 362 309 349 265 
257 277 191 386 240 290 
38 46 113 340 305 347 46 104 340 2 
29 478 193 
241 177 269 462 61 
455 104 340 362 309 70 174 311 231 129 
335 32 458 131 340 282 196 19 
451 159 151 251 229 
242 462 134 72 76 181 
335 455 202 134 293 242 466 
299 159 22 251 53 
465 133 468 87 265 179 202 142 160 192 346 295 
63 113 340 55 257 375 234 354 458 129 
458 373 273 127 197 
455 106 17 174 466 
458 175 152 211 336 257 164 341 234 383 492 
132 63 47 62 291 309 265 146 
63 47 309 244 269 270 260 89 62 33 
257 159 47 152 357 
458 346 288 473 269 
38 46 362 309 59 227 265 
275 151 50 231 129 
63 96 104 340 86 231 129 
455 273 110 455 202 349 269 32 
455 362 309 59 265 
179 432 203 62 470 338 
38 231 284 86 
14 202 340 362 309 47 265 
257 75 131 134 417 438 153 
215 36 270 450 
269 250 423 309 91 
458 431 257 97 309 184 
347 63 230 396 63 11 
46 282 309 86 205 
179 355 310 336 257 260 
269 346 134 469 458 129 
269 431 59 428 275 458 129 
265 346 351 257 130 269 175 309 127 
179 432 351 275 
455 474 271 130 309 282 92 
257 219 473 496 114 
370 133 47 209 323 146 
257 21 285 131 134 68 
269 11 127 62 489 162 
334 133 214 497 134 127 142 180 
257 395 462 54 234 156 
179 151 453 309 258 227 336 286 458 129 
63 106 218 309 305 
269 284 127 240 337 240 269 191 439 492 18 458 129 
234 233 265 196 191 274 
132 179 47 134 152 198 309 55 205 
132 215 202 134 408 394 29 28 
426 338 462 24 62 470 338 458 129 
242 462 62 67 357 477 458 129 203 62 477 
84 462 257 392 33 
257 451 299 159 151 251 301 
170 133 353 309 68 
257 470 169 36 257 477 
179 151 257 416 292 336 257 338 
458 431 340 362 309 282 145 
455 6 309 408 269 257 392 437 455 4 
458 250 270 165 
269 346 257 97 118 
455 104 340 362 309 349 46 
179 353 309 417 289 28 
231 191 209 252 105 381 
257 299 353 289 68 
455 483 242 462 257 291 130 309 319 458 129 
335 458 108 280 38 191 340 249 32 
216 215 129 179 250 271 68 
269 346 62 216 263 
92 462 134 458 129 
132 179 293 227 257 19 179 4 282 
257 241 151 460 308 44 
458 346 474 269 453 
257 465 209 271 385 28 
269 191 62 50 294 458 129 
84 231 175 306 377 
29 23 265 269 191 62 50 437 
365 133 214 131 134 153 205 
257 406 94 309 420 32 301 
242 462 199 455 188 
383 410 22 214 163 
372 458 497 340 188 269 
455 358 19 173 309 257 384 
257 341 202 127 257 49 258 
179 468 286 265 92 22 453 309 127 80 231 129 
233 25 94 171 
257 164 109 497 134 142 127 180 234 68 
215 131 134 153 257 195 
455 4 134 75 205 458 129 
458 129 458 250 271 289 68 
455 188 233 458 204 
46 106 474 309 472 269 311 
133 353 68 144 257 407 
455 104 340 362 309 244 33 245 84 
434 7 309 174 303 309 349 269 
179 250 152 437 309 450 
383 446 275 
269 346 134 453 309 311 
299 159 22 251 309 127 316 398 203 62 217 
241 22 437 309 450 
458 250 271 146 189 241 256 491 
257 35 462 251 309 127 445 192 
231 353 309 408 29 28 
12 170 133 250 271 367 68 
144 265 231 346 189 233 27 
179 151 257 392 336 257 392 
84 63 151 257 392 
179 131 134 483 268 257 239 
265 41 191 361 
269 346 24 174 172 
257 383 195 151 54 309 267 374 217 
269 191 340 62 318 
455 103 46 104 242 
458 250 271 289 28 
458 346 474 227 257 466 203 257 424 
257 297 141 214 191 427 
269 346 453 309 244 418 
335 92 151 257 434 
257 425 342 175 134 36 257 343 92 
470 169 133 250 271 367 68 
434 284 340 483 242 462 257 384 336 257 162 
458 129 458 495 
458 346 134 453 300 
132 455 4 136 265 
257 425 364 129 269 431 340 86 14 179 151 
202 455 127 198 309 282 434 309 349 205 
269 131 134 153 257 195 
257 395 11 127 182 171 
265 191 14 63 22 
269 346 273 41 442 
231 202 134 408 28 
299 159 22 251 442 53 
231 191 209 379 256 116 
38 458 373 127 257 338 346 374 277 
257 80 151 54 309 456 414 192 
179 22 351 446 
257 29 462 1 
231 307 309 472 205 483 
179 60 269 72 419 
92 22 271 367 28 
257 141 462 251 309 19 246 278 
242 462 134 174 243 458 129 
265 202 311 24 242 
335 458 17 320 
92 346 271 130 309 472 394 466 
269 346 33 234 159 
332 80 11 244 378 381 242 34 
257 281 346 469 234 184 
265 462 347 92 462 62 281 
104 340 6 309 282 174 153 
265 346 134 257 443 242 115 
179 104 340 47 29 466 
179 273 287 485 257 348 
63 188 242 462 62 259 234 170 93 
458 346 134 52 309 104 265 
455 131 340 197 245 
265 346 257 81 346 263 
257 476 109 353 309 408 28 
257 477 497 134 142 127 36 
269 191 257 49 118 63 250 
271 270 79 184 231 129 
455 483 269 346 453 309 127 62 357 396 
419 159 22 251 192 
63 11 134 6 32 
257 169 287 271 289 28 268 257 443 
271 330 462 271 165 
43 133 497 134 142 127 180 234 68 189 257 91 
126 47 152 361 56 255 
179 47 163 45 139 434 
63 113 340 75 433 309 104 275 129 257 285 
132 63 113 340 483 268 269 487 63 305 265 395 260 
242 191 438 297 336 257 281 
265 346 134 62 165 405 
179 47 439 317 
179 131 340 47 62 274 437 
269 191 257 291 118 309 104 257 277 129 
92 462 62 293 234 367 345 
132 458 131 134 47 33 309 282 300 
455 250 423 309 104 415 265 458 129 
455 497 134 320 174 437 
455 358 396 234 46 
410 497 134 127 180 309 68 189 257 343 
335 179 495 309 197 280 
257 477 79 
248 214 129 257 407 191 67 357 
63 151 290 265 63 104 340 47 237 454 458 129 
242 462 62 452 59 
179 131 134 68 
242 462 96 107 309 184 
11 269 127 111 412 184 
309 173 92 191 271 263 309 472 
455 131 340 372 86 199 191 453 189 458 129 
439 434 22 163 
383 29 434 47 152 128 163 
269 346 24 62 117 387 
179 273 408 485 
455 250 271 337 60 89 227 458 129 
269 346 62 117 401 458 129 
92 22 271 222 336 452 343 
63 86 63 113 340 314 269 458 129 
179 113 340 282 254 
269 346 271 117 401 84 
438 120 7 414 
455 110 269 191 226 300 475 184 
215 47 495 227 68 189 257 44 
257 206 476 169 250 271 367 68 
270 191 209 190 456 217 
455 104 340 483 455 358 293 205 
458 462 62 330 336 333 
257 281 462 41 489 
33 320 180 
269 346 134 453 309 127 62 165 
231 353 309 408 233 153 
379 205 92 346 271 260 
84 63 47 309 483 336 428 29 130 
179 497 340 218 485 415 394 
347 458 131 340 59 458 202 47 17 
460 278 151 256 316 351 203 443 
179 161 62 407 442 192 189 257 181 
179 11 127 197 458 129 
458 202 134 408 29 28 
265 462 446 38 455 4 127 446 
269 191 62 50 437 234 233 
132 242 462 337 240 269 4 218 
46 104 340 293 345 
132 269 11 134 127 89 394 298 
257 451 175 309 127 257 392 
63 250 309 48 199 63 250 
215 497 340 142 127 180 234 68 
332 299 159 22 251 229 
38 46 373 24 269 
132 242 11 47 309 59 
257 291 253 257 88 
159 151 134 251 487 156 
458 129 458 131 340 411 309 77 173 
255 250 495 309 244 310 
92 230 127 383 364 458 129 
92 122 127 323 369 
271 29 178 7 337 
92 22 340 62 391 336 434 231 129 
460 269 17 466 
242 11 127 72 486 162 458 129 
12 133 129 179 250 271 146 189 257 91 
231 436 257 374 441 
179 358 282 173 458 129 
374 115 63 432 453 309 319 309 255 
132 84 269 346 50 
455 497 2 415 269 405 
63 250 62 357 294 
32 271 2 191 58 
257 112 462 251 309 47 271 332 23 212 312 
132 458 497 340 244 46 254 
13 102 191 134 316 99 
455 288 47 152 
46 351 362 309 127 257 392 
383 241 436 203 402 123 229 
347 46 483 46 106 249 242 260 324 46 47 
242 33 175 152 271 446 
246 151 251 309 315 
231 79 234 257 97 
242 462 96 62 50 393 
257 260 191 182 264 
203 201 443 257 29 178 191 297 
132 63 356 62 130 309 472 269 311 
269 288 175 152 458 129 
62 395 295 462 251 374 115 
269 346 152 62 489 162 458 129 
257 383 22 134 251 309 396 257 482 189 229 
269 346 134 469 344 
434 11 305 412 46 
257 76 497 134 127 180 234 68 
132 455 191 340 268 309 104 265 84 
63 432 24 62 117 387 
455 351 113 340 349 173 
257 167 334 175 495 
455 47 340 251 394 336 242 
455 362 257 140 309 218 197 231 129 
304 208 191 257 40 
132 265 122 258 286 374 217 
257 159 250 152 251 
269 131 134 153 438 61 51 
269 346 84 58 
269 462 62 165 203 257 488 
455 104 340 483 92 462 270 
271 270 175 152 116 
63 47 309 47 29 434 258 286 
458 129 179 202 127 445 381 
370 133 129 179 362 62 35 176 374 217 
341 133 353 309 408 332 28 336 257 313 
455 131 340 86 458 191 265 357 
434 104 340 349 265 
257 170 131 134 68 189 257 91 
265 346 419 441 
269 462 72 85 336 257 476 109 
257 80 151 309 121 189 171 
458 131 340 408 28 336 438 80 
63 432 134 453 309 408 203 37 408 485 
179 131 13 33 
455 202 134 127 198 309 68 189 265 458 129 
269 175 423 309 104 415 479 231 129 
84 269 175 257 429 234 95 451 117 463 
63 47 271 146 189 265 
38 347 179 151 63 11 
458 471 340 127 92 
257 222 47 134 152 36 
458 373 35 234 184 
458 214 175 316 271 398 477 
269 346 134 24 63 131 340 86 268 173 
63 11 119 257 263 
458 346 62 39 494 
46 471 340 282 300 415 269 
269 462 460 58 309 55 269 
458 202 134 177 14 128 269 
179 151 371 258 475 257 398 
29 133 497 134 127 180 234 68 
179 104 340 24 205 458 129 
269 462 62 165 336 426 239 
63 284 408 173 62 429 
341 133 129 72 44 191 308 130 
132 63 306 257 260 
45 231 250 309 472 62 82 176 
227 265 462 453 309 59 
455 104 340 483 92 11 127 62 165 458 129 
38 63 47 272 317 84 
62 350 225 191 54 381 301 
179 11 267 32 
458 191 381 209 379 256 116 
458 404 257 140 
257 91 191 322 203 62 326 477 192 
269 346 288 62 357 118 
458 11 214 314 438 259 240 257 51 346 494 203 150 
231 191 88 415 423 234 233 38 233 377 317 
480 214 462 62 236 380 
455 104 340 362 309 282 9 242 
493 151 257 275 265 151 107 
84 269 346 134 257 443 
460 92 175 152 328 
265 346 134 426 260 
132 458 129 458 202 273 65 309 479 
132 63 209 173 379 438 211 
257 434 22 291 458 129 
269 346 257 451 452 458 129 
179 432 50 400 
455 104 340 47 257 466 
257 341 353 309 68 189 493 222 
80 22 460 453 189 
92 11 288 127 30 294 
455 471 340 127 71 245 458 204 
269 346 134 453 309 145 172 
257 169 287 271 29 28 268 257 443 
458 346 214 257 496 215 135 
269 131 340 55 92 
458 462 460 256 445 38 175 134 344 152 116 
242 462 62 243 412 257 43 239 458 129 
390 57 104 340 188 173 
455 351 131 340 362 309 104 269 
458 202 340 68 289 
132 455 460 47 309 305 257 294 
265 202 96 127 257 392 
269 273 474 309 265 369 
269 191 62 117 263 234 184 132 455 47 316 257 291 270 
455 104 340 483 92 462 394 357 293 234 269 
257 91 497 134 127 142 36 56 43 133 
455 104 340 483 265 346 257 443 
132 63 362 269 38 63 24 269 
330 497 134 127 142 180 234 68 
140 215 214 353 309 68 
438 153 191 134 322 
242 497 127 62 118 336 257 236 
257 409 462 251 309 456 414 374 115 
63 316 387 375 
257 465 68 7 192 
458 175 257 333 309 337 458 129 
84 458 346 8 309 127 41 117 
455 47 428 354 
257 212 22 427 456 34 
493 195 151 256 445 132 47 134 152 116 
395 159 22 251 53 
231 64 257 482 
335 455 388 38 404 234 258 
12 170 390 250 271 68 
458 250 134 249 257 91 
455 473 309 207 
455 131 340 244 205 
455 131 227 257 291 275 
234 286 242 462 134 257 384 
45 63 432 453 309 2 265 414 
132 63 460 47 340 180 265 369 
92 22 383 336 205 
242 191 134 257 443 458 129 
179 47 62 357 393 
265 346 134 257 130 455 473 309 315 257 281 
269 346 257 465 46 314 
92 462 214 257 103 234 257 416 
458 129 271 263 175 152 316 189 69 309 160 
493 222 497 134 127 36 
203 242 443 46 432 134 
63 47 340 306 269 344 
179 284 258 286 
132 179 497 104 423 234 286 
289 28 22 134 209 
455 96 104 340 362 309 68 189 269 
92 346 271 29 130 309 104 269 
257 159 22 340 50 
352 133 353 309 68 189 257 222 
132 455 460 47 340 17 62 397 
265 191 377 492 18 
63 483 179 104 340 472 62 391 336 466 132 179 104 
458 175 460 134 152 356 
46 151 453 309 472 257 437 
242 462 438 451 115 
455 351 6 309 244 269 270 441 89 62 33 
257 456 397 191 273 182 
242 462 134 199 455 362 
133 214 128 252 434 22 491 
132 458 287 271 29 28 
132 179 22 340 257 49 165 
269 131 134 408 257 385 28 336 257 401 
257 411 191 361 
458 191 468 458 250 152 361 
132 269 346 62 357 270 
390 64 257 482 
269 346 134 24 458 346 134 453 309 127 197 
132 46 106 474 309 2 257 260 
265 191 107 
269 346 257 49 130 458 346 316 466 203 257 236 
179 151 310 336 257 97 488 458 129 
269 11 127 50 309 282 197 
242 175 152 64 56 257 352 341 
257 465 495 68 
63 104 340 47 339 454 458 73 
132 458 431 340 349 257 148 277 
257 76 495 
179 129 63 104 134 293 173 
38 231 471 340 305 332 
257 470 169 129 269 250 271 68 189 257 370 91 
139 287 485 38 388 172 
132 347 455 104 340 269 346 134 453 309 127 257 384 336 257 424 
63 96 104 340 86 
92 191 271 367 68 475 257 186 341 
38 269 346 134 469 344 
455 296 8 309 282 257 28 458 129 
257 112 495 
150 191 273 52 309 267 
92 346 271 181 92 458 129 
269 460 175 134 152 
458 79 257 334 335 
257 25 131 340 258 438 443 
455 273 474 62 91 189 269 
257 107 118 462 309 6 
455 104 340 483 268 257 416 
231 202 340 408 233 153 
455 250 309 408 265 485 
455 104 340 71 234 257 424 231 129 
455 358 288 188 265 
63 351 47 309 472 269 311 
455 191 288 52 309 104 174 27 118 231 204 
189 376 179 131 340 
246 195 22 427 456 156 
179 250 271 68 
265 462 134 257 443 405 257 186 470 169 129 203 62 477 
370 390 177 
242 462 72 238 243 458 129 
455 47 340 129 265 
455 17 212 434 336 174 387 
63 47 62 223 338 
257 263 191 337 
458 273 468 438 153 
455 113 340 188 455 276 62 224 
257 29 330 191 427 
257 112 346 263 462 251 309 127 316 398 301 
257 330 175 134 152 116 
63 351 362 309 305 
269 346 50 234 257 78 
257 91 462 274 
257 456 447 336 80 183 378 456 217 
28 47 134 152 209 
257 409 11 121 374 217 
179 358 2 30 260 156 
63 104 134 483 269 462 58 
458 404 234 496 221 
455 131 134 86 205 
257 369 191 340 469 
455 296 257 211 336 257 387 458 129 
269 346 96 134 72 389 265 346 125 309 127 357 234 205 
257 341 131 134 142 68 189 257 91 
63 230 349 458 129 
63 362 309 244 233 172 
215 209 271 289 146 
242 270 191 340 453 309 282 300 
269 284 319 309 62 35 
458 497 38 458 131 
246 250 152 437 
46 474 257 126 107 270 
227 185 22 145 
455 191 273 116 
92 191 271 68 475 479 189 257 91 
455 110 269 191 340 
455 104 340 24 243 458 129 
269 11 258 426 239 38 269 462 257 291 118 309 104 
455 483 269 202 127 50 
132 231 131 340 305 30 260 
341 133 497 134 127 180 234 68 156 
455 106 474 309 483 265 
269 346 62 117 217 155 129 
269 273 145 184 487 257 384 336 257 115 458 129 
62 297 191 427 
476 133 129 179 497 134 142 68 189 257 91 
455 104 340 483 92 191 
335 32 231 373 
159 22 251 229 
132 257 341 129 227 22 163 
242 462 257 456 33 455 296 453 309 104 242 
438 409 462 54 309 121 374 217 
38 242 462 257 441 
269 191 62 50 115 
63 104 340 47 62 215 75 
203 242 443 179 151 
269 346 453 309 127 62 117 465 
257 341 175 226 257 317 
269 431 134 47 95 27 215 75 
257 25 250 134 152 322 
257 299 250 271 289 28 
269 11 134 125 127 257 456 
458 202 134 177 199 482 179 373 119 
269 191 438 297 172 71 336 257 281 
458 129 428 250 152 209 132 287 271 289 146 
458 276 203 265 395 
179 113 340 244 242 475 394 336 286 
434 471 340 282 163 
269 11 244 33 458 129 
269 131 134 47 28 
257 425 364 38 158 219 235 47 62 402 247 
458 191 351 41 39 234 184 458 129 
269 11 127 24 84 
242 263 462 257 291 118 
395 159 151 251 309 127 322 156 
257 91 191 134 36 56 257 138 
455 202 24 309 47 306 269 
269 346 62 50 82 
265 346 227 46 4 103 234 
455 131 340 362 309 59 329 32 
257 370 341 131 340 104 269 487 192 
455 460 47 30 294 309 319 
132 265 431 134 47 309 127 
212 241 436 381 
63 47 309 315 405 
80 151 251 309 121 487 171 
159 497 244 105 
257 393 230 47 428 458 129 
196 336 257 496 343 7 456 217 
458 131 340 408 485 189 257 115 
269 346 257 275 265 408 257 476 327 
455 351 362 309 314 269 453 
38 265 462 134 237 62 489 130 245 
84 63 282 62 429 
265 346 227 455 293 
257 222 287 271 289 28 
62 393 285 131 134 142 65 62 60 371 68 
179 110 179 250 163 173 
455 230 177 265 242 462 257 126 107 369 
92 462 271 332 458 129 
179 131 134 104 265 
455 296 453 309 19 426 292 458 129 
455 250 309 282 197 189 269 
170 133 497 134 127 180 234 68 
159 151 134 251 324 229 
269 351 131 340 319 174 130 405 
347 455 2 357 257 466 462 288 453 309 127 92 
179 22 309 127 124 203 62 435 334 203 422 
455 250 423 309 104 415 269 
269 346 62 67 107 310 336 426 260 
92 462 62 489 130 309 319 458 129 
269 346 134 24 458 346 453 309 2 30 270 336 143 
63 104 340 293 269 458 129 
63 497 127 203 456 378 
299 28 22 309 127 209 381 192 203 422 
265 462 134 62 165 234 184 
257 165 462 257 153 
80 151 54 309 121 376 
46 47 309 472 265 263 
458 346 62 50 494 
269 113 340 127 52 
132 455 11 244 451 
257 77 191 187 254 442 156 
458 346 453 309 121 343 234 265 
347 179 104 340 362 309 188 269 265 346 13 165 
63 47 309 314 220 189 426 260 458 129 
479 175 288 64 242 
265 462 227 455 4 104 
257 311 175 288 218 451 
458 353 309 408 28 336 257 443 
257 159 151 251 203 257 374 464 418 
231 287 271 289 28 336 257 278 
63 113 340 188 269 
455 351 471 340 127 62 310 336 269 
242 462 62 357 33 336 257 115 
455 47 309 188 203 265 
257 419 462 134 54 324 176 374 115 
257 334 346 345 209 229 191 226 379 68 
257 390 177 231 11 127 427 
63 113 340 258 173 264 
458 276 257 451 383 
269 191 257 291 263 
493 159 22 214 209 192 
271 28 47 152 209 
455 362 309 282 189 415 174 210 84 231 129 
132 379 221 92 462 271 429 89 227 
38 63 47 340 249 257 384 336 208 346 385 327 
29 433 47 13 27 278 
242 217 269 346 484 
455 202 103 179 202 311 415 286 
434 131 362 286 
455 351 104 340 86 14 346 453 309 472 257 466 203 269 458 129 
458 131 134 153 394 433 
269 175 273 152 356 
269 346 474 423 309 104 415 184 
179 104 340 362 309 349 13 341 104 265 
271 367 247 191 128 
269 462 84 62 17 281 
51 133 47 64 493 482 
458 250 271 29 367 28 
215 214 353 309 68 
257 302 129 458 191 209 132 353 289 68 
231 122 273 218 
455 47 423 309 104 415 257 253 
63 432 134 200 458 129 
269 191 233 297 463 203 62 34 
269 346 453 309 121 458 129 
455 4 134 188 269 458 129 
458 473 309 319 172 
455 96 104 340 86 199 257 165 462 
257 338 11 134 127 88 379 62 494 458 129 203 257 477 
104 455 293 309 177 332 
455 362 309 127 92 231 73 
159 122 134 127 99 487 53 
63 47 193 189 242 
269 11 472 95 27 160 192 
257 277 346 474 62 357 411 
455 296 273 453 309 408 203 
12 133 202 134 68 
46 497 340 177 199 269 191 
132 151 179 8 309 258 173 
179 284 127 491 
458 214 316 143 29 448 
92 462 423 309 257 118 
395 159 22 251 176 229 
63 351 104 340 104 269 
231 131 134 181 62 477 
455 113 340 258 254 458 129 
159 22 251 442 229 
455 104 340 483 179 11 6 309 207 
439 241 22 491 
179 314 233 465 
426 66 11 134 75 459 154 129 
455 47 62 496 210 291 84 
458 17 257 419 
179 351 104 340 86 269 
242 462 257 451 33 455 106 316 62 91 24 242 231 129 
265 471 340 127 257 443 242 33 
231 131 340 408 28 336 257 253 
270 12 191 491 
433 151 343 197 
265 346 199 63 293 
257 80 22 382 309 257 326 
455 131 340 177 458 191 62 165 489 129 
458 131 340 47 309 104 242 
438 263 191 251 192 
132 458 495 309 177 196 
257 488 175 309 127 291 
455 351 473 309 218 197 
215 38 170 133 250 271 367 68 
455 104 340 47 62 260 458 129 
269 191 340 62 165 234 286 89 227 
455 106 273 249 269 324 458 129 
458 131 340 282 62 429 
46 288 104 265 
269 287 271 28 336 257 443 
458 129 438 338 473 309 472 62 477 324 394 263 462 226 
341 133 131 134 68 189 257 91 53 
269 346 134 200 344 234 286 
257 419 462 125 309 127 337 
335 46 4 319 234 269 
458 346 214 355 62 494 
439 434 22 491 203 229 346 343 
455 131 340 413 254 309 104 242 
257 133 250 271 289 146 
265 409 175 134 152 54 
179 122 127 257 49 434 14 151 
242 471 340 127 257 384 458 129 
458 129 62 350 225 202 127 445 381 203 257 441 
92 191 271 293 309 483 
270 404 173 62 153 
383 434 22 163 
405 191 174 392 397 336 257 217 458 129 
387 312 84 19 233 
210 462 446 84 
72 213 285 353 309 68 189 257 443 
455 11 134 71 300 
265 462 199 63 362 
438 91 497 134 127 36 
269 471 340 127 257 456 
257 263 462 485 309 257 138 354 368 
480 346 393 175 273 316 269 309 394 
92 151 29 275 265 151 332 107 
455 483 269 346 62 67 357 118 309 47 
458 175 62 291 309 160 
458 497 127 209 240 176 240 192 
458 129 179 22 312 336 257 170 
257 299 495 309 408 233 153 
458 346 251 309 104 257 97 32 
265 346 50 234 286 
57 213 133 129 271 263 191 251 
269 284 340 311 
455 483 269 462 67 107 
62 395 350 225 191 161 
497 458 47 306 412 257 392 
329 104 340 362 309 55 242 313 458 129 
179 151 310 336 257 97 387 144 227 
227 104 101 203 255 
458 175 129 458 83 139 434 131 134 362 309 349 257 341 121 
269 346 355 62 310 336 210 
231 191 8 309 355 257 451 309 305 257 294 
455 362 309 2 203 257 424 321 
455 47 134 250 317 
63 432 310 336 257 345 
455 47 212 317 
458 335 88 142 
455 47 340 318 485 344 458 129 
257 285 497 340 177 199 257 327 151 
269 346 134 62 117 165 
13 278 22 134 209 
458 250 271 317 
269 191 257 130 63 473 309 319 
455 104 340 483 455 358 282 205 197 458 129 
265 295 462 308 160 
242 443 474 254 336 320 458 129 
458 175 62 489 130 309 319 
370 133 177 179 47 271 237 278 
455 362 309 408 434 13 466 197 154 129 
458 214 462 251 309 160 
335 231 202 127 223 309 60 496 221 
179 151 54 309 65 171 
63 358 349 458 129 
455 104 340 362 394 336 265 
126 138 312 218 475 257 40 424 
269 191 340 161 
456 115 458 17 203 257 451 447 
269 346 174 33 455 483 309 127 357 
257 146 497 134 142 127 36 
63 358 282 205 374 33 
179 17 320 336 257 341 
63 47 309 19 205 
269 191 62 323 254 336 174 320 
84 63 293 159 
266 434 22 163 335 
132 231 462 340 268 309 35 234 173 189 171 
257 341 316 271 68 192 
458 316 271 398 477 
257 150 191 273 52 309 267 
265 183 212 492 
257 16 497 134 127 180 234 68 229 
271 409 175 152 54 
242 462 340 62 165 
179 202 134 417 438 153 
265 11 127 310 336 426 44 
269 346 351 41 337 309 172 
154 462 125 309 6 32 
185 22 312 336 150 
335 458 7 485 415 257 424 168 
458 73 455 103 63 104 340 47 309 104 265 
38 179 282 271 159 
265 346 496 114 458 129 
63 273 356 394 336 265 458 129 
271 289 28 22 99 
132 63 202 134 24 309 408 265 485 
179 436 234 13 338 
455 104 340 483 179 4 55 
269 191 62 337 397 
257 91 11 127 209 374 115 
257 409 462 134 251 309 315 487 374 115 
257 28 22 322 192 
132 269 287 271 28 
246 221 151 251 203 176 122 
231 353 309 68 
460 221 11 319 189 
87 151 87 
271 270 175 152 427 203 257 443 
271 28 22 128 
458 358 319 203 374 217 
377 440 131 340 86 
257 396 462 134 469 344 
269 462 62 369 336 271 65 
257 477 131 134 408 394 332 28 
269 346 152 62 446 115 
428 104 340 362 309 127 356 
179 151 251 309 121 414 257 217 
458 202 340 408 438 153 
455 113 340 319 96 167 
92 191 271 68 475 257 215 
408 286 62 429 309 472 257 443 
269 346 62 162 265 4 319 189 234 139 418 
63 497 47 226 257 260 309 205 132 63 273 474 257 429 
45 265 346 270 118 63 432 453 309 47 309 6 38 104 
231 191 226 309 257 302 38 191 209 171 
63 362 271 243 458 129 
215 129 383 434 22 163 
240 179 177 203 101 80 121 
257 409 462 251 309 456 234 418 
455 191 340 24 242 
1 64 257 91 
132 455 296 134 453 309 282 9 265 181 
12 133 353 309 68 
455 110 63 182 62 357 260 
257 12 341 250 271 367 68 
458 351 131 340 166 269 
31 209 139 456 115 240 310 336 257 459 80 
92 191 271 367 68 475 257 370 133 
38 347 269 346 33 309 319 269 346 33 309 319 
63 483 63 358 305 458 129 
257 49 118 63 4 104 462 19 173 
455 104 340 362 309 282 9 265 458 129 
455 362 309 483 268 269 
174 90 191 382 405 
179 145 13 27 434 
129 62 40 299 
455 104 340 188 265 269 346 62 170 263 
242 33 458 175 465 
458 175 273 152 356 
289 23 265 63 4 134 68 458 129 
257 365 36 257 146 132 495 227 68 
354 133 495 309 142 68 
377 120 22 491 
455 362 309 319 309 422 
132 11 179 311 
234 332 23 383 492 269 346 152 351 30 441 379 173 
257 393 175 62 357 141 336 400 458 129 
265 346 423 309 173 
455 483 269 462 257 291 118 309 104 
257 263 191 322 192 
271 395 295 175 152 316 
63 293 30 117 305 
63 47 117 327 203 426 338 38 63 104 340 362 309 319 197 
242 462 134 62 206 165 
257 154 66 175 361 257 482 
269 131 134 408 28 336 257 482 412 205 
46 4 59 269 144 62 115 
265 346 199 63 2 
347 458 473 309 127 189 257 112 458 284 47 404 485 38 79 309 127 189 257 112 
231 497 340 258 173 
458 191 257 451 270 336 257 141 427 
63 106 474 309 59 257 488 
455 483 63 432 92 84 
257 447 191 50 458 129 
46 106 474 309 127 39 
458 129 438 341 473 238 215 309 244 469 
38 458 346 134 453 309 127 
458 462 251 309 65 309 257 425 364 189 192 
257 395 462 54 234 171 
257 91 131 340 408 289 28 
246 433 353 309 68 289 189 257 443 
394 281 11 104 
455 460 188 269 462 62 357 247 458 129 
231 497 282 252 492 
426 224 462 309 319 234 463 
455 202 273 47 110 336 265 
92 191 271 68 475 257 467 
266 22 491 
458 346 291 458 129 
257 476 285 202 134 68 189 257 91 
455 110 257 397 191 469 
132 257 352 434 22 446 
179 47 353 309 68 189 438 443 
132 269 175 344 309 244 332 345 
38 269 346 107 
455 460 104 340 188 265 63 113 340 
257 313 94 456 115 
242 462 271 446 
458 431 340 411 309 55 92 
269 462 357 101 
265 191 383 492 18 
269 346 134 107 
265 346 227 257 277 129 
234 257 451 33 458 306 
257 225 191 382 309 257 238 326 
458 346 273 453 309 127 197 
439 29 434 22 491 
269 191 351 62 50 243 
38 455 296 134 453 309 104 265 
31 346 170 129 269 250 271 367 68 
132 271 398 477 175 152 316 
46 104 340 372 362 309 218 172 475 311 
227 257 461 22 203 438 153 
132 458 131 340 47 257 466 
293 19 347 179 362 309 55 269 
265 284 340 127 62 165 
257 375 230 319 189 
159 22 209 192 
132 126 434 104 340 86 265 
271 29 28 22 318 
455 250 152 343 234 62 489 33 
92 191 271 68 475 370 390 
257 334 131 134 142 472 257 295 398 
270 455 103 458 129 
185 12 120 22 163 456 217 
257 390 92 151 412 173 
439 434 22 437 
179 104 340 86 257 378 458 129 
63 104 340 362 243 
269 346 257 424 321 
63 351 362 309 2 
215 129 179 250 271 289 28 
242 420 247 462 62 274 305 234 257 370 239 458 129 
458 495 309 408 438 456 153 
458 431 340 311 357 
126 151 460 92 
63 104 340 86 14 13 393 462 458 129 
458 250 271 289 28 336 257 44 
38 455 483 265 346 257 117 165 
63 103 231 4 258 286 
46 151 426 494 
395 159 497 244 383 105 
269 284 340 127 242 130 
179 129 179 131 340 362 205 458 129 
257 407 497 218 203 257 374 464 105 
132 63 104 340 86 227 336 265 344 
458 129 458 202 134 68 289 
269 346 227 446 84 458 129 
351 408 184 428 33 
38 63 106 17 265 
131 340 63 227 2 265 260 
132 257 60 7 176 
179 104 340 362 309 188 269 458 129 
462 92 62 378 234 233 
63 293 309 47 332 146 
299 159 22 134 251 487 301 
257 263 191 251 301 
269 250 271 289 28 268 173 
269 191 257 40 260 262 257 383 329 
38 45 265 346 257 130 269 11 127 
92 346 351 271 130 
428 22 38 428 22 340 458 129 
383 241 436 381 203 302 
92 191 237 62 411 
194 22 468 309 65 172 
455 129 265 346 134 453 309 55 184 
92 462 273 62 357 33 234 62 420 
242 462 270 260 458 129 
63 432 453 309 2 203 269 
62 334 263 462 251 381 242 217 
179 151 251 309 91 197 89 257 384 336 257 34 
227 22 209 381 301 
179 460 104 340 47 270 
455 351 362 309 349 173 32 458 129 
458 129 185 434 22 491 
265 346 257 456 118 63 362 458 129 
132 347 265 346 257 130 269 346 474 309 127 265 346 257 130 269 346 474 309 127 
455 296 220 234 257 448 
179 151 257 126 107 275 458 129 
269 462 333 38 466 
269 96 175 340 152 425 346 281 
269 346 62 50 258 
215 129 266 22 491 132 250 271 289 28 
38 269 11 244 62 430 
63 22 62 337 387 
257 494 336 62 366 85 462 134 62 380 336 257 341 
257 169 129 269 250 271 29 28 
439 29 169 133 47 152 427 
455 296 8 309 305 257 260 
455 104 340 24 403 10 
458 346 134 92 309 396 
257 51 204 269 11 160 
132 10 284 340 55 92 
29 329 11 127 73 203 257 416 
231 473 309 86 14 269 191 
395 159 22 251 405 
257 410 47 64 257 482 
455 24 227 336 205 
63 47 340 356 233 344 
179 404 257 77 109 
269 191 24 458 131 340 294 
92 191 271 146 189 257 102 336 257 29 439 491 
92 346 103 234 233 
455 47 423 234 257 416 
458 497 65 240 176 240 156 
257 16 22 437 240 179 88 311 
231 175 134 152 249 3 335 
455 468 233 265 231 284 340 319 197 231 129 
464 28 22 209 
455 483 265 346 107 
455 296 134 453 309 472 205 59 
63 104 340 47 33 309 282 9 143 28 
199 175 355 336 257 317 
458 129 270 336 257 195 191 209 
265 497 134 127 36 
179 86 199 346 107 
458 191 62 494 458 129 
257 409 462 251 309 244 492 
257 330 175 273 152 116 
138 133 129 257 80 202 456 414 192 
383 341 120 22 491 203 257 343 
257 140 462 257 279 336 257 164 336 257 97 153 
270 336 257 491 381 436 
132 455 296 134 8 309 104 265 
347 455 104 340 458 11 104 269 32 
231 307 309 71 32 
257 81 129 458 251 309 218 308 77 
458 346 453 234 257 168 
257 28 11 335 355 398 
438 90 250 271 367 68 189 257 417 336 257 91 
257 21 285 131 134 47 72 367 68 189 257 222 
179 47 266 327 458 129 
269 346 438 263 
63 151 257 97 434 
257 451 407 191 456 115 
458 473 62 387 
72 12 285 64 257 91 
231 4 355 42 270 
257 302 191 382 309 87 
31 462 257 49 99 339 333 
269 191 340 62 452 
231 497 134 127 180 234 68 301 
227 257 452 400 47 250 327 
458 273 474 309 145 
179 131 134 153 257 206 465 
257 476 399 129 62 263 202 127 316 203 266 105 
63 293 332 195 24 173 231 129 
46 474 309 47 270 494 
257 368 128 
132 265 431 340 282 173 280 
271 35 191 251 
458 191 62 330 336 459 
347 46 104 340 47 269 46 432 134 453 309 472 269 
458 202 340 177 14 468 173 
179 113 340 319 189 407 24 242 
84 269 346 257 451 55 
92 462 271 33 234 123 458 129 
257 470 90 353 309 153 257 383 195 
63 358 349 231 129 
455 296 453 309 319 92 38 2 174 260 
265 346 134 199 455 104 
242 462 62 243 234 426 317 
45 265 346 426 224 
455 103 242 11 59 
132 231 129 231 202 134 65 309 1 
455 296 134 290 455 17 234 265 
45 269 346 62 357 82 
269 191 134 99 347 179 22 116 
242 462 426 49 172 
455 131 340 47 309 26 257 305 
455 47 340 152 92 234 62 430 
269 346 62 61 260 458 129 
63 11 47 309 6 38 305 
49 46 4 258 184 84 
269 346 310 336 257 101 
92 462 271 293 309 104 45 
266 434 47 152 427 
257 409 462 251 309 456 266 34 
269 11 84 319 309 257 303 
428 434 129 179 188 257 123 462 134 469 
269 284 127 332 257 434 
458 287 271 29 28 336 257 80 
179 47 495 309 68 189 58 482 
84 265 462 62 489 33 
231 191 209 144 62 464 105 
455 104 340 483 269 346 62 243 63 293 309 127 203 
455 104 340 96 47 62 172 
63 432 67 337 309 220 275 254 
38 46 11 349 269 227 
62 395 263 191 187 245 487 381 242 115 
63 151 134 337 309 72 247 458 468 87 
265 346 310 336 257 260 
269 346 134 257 466 
455 351 113 340 319 172 
179 471 340 498 309 13 81 
62 464 124 309 486 77 
458 278 309 396 269 
84 458 175 257 434 197 
341 133 188 265 11 59 
257 133 151 340 453 309 60 265 
455 202 134 86 257 28 100 269 191 134 310 336 174 259 
257 370 164 109 307 309 59 265 
231 88 271 367 387 
132 269 191 62 357 463 
455 473 309 244 269 
63 180 257 395 439 
455 483 63 131 265 
265 284 340 127 257 443 242 115 
144 257 397 231 250 309 127 226 309 257 302 
179 358 104 62 357 259 
269 191 438 40 224 
269 230 47 152 62 391 
377 22 427 
455 288 47 458 129 
63 460 47 309 396 
265 346 62 391 336 434 
266 434 22 427 38 151 460 308 44 
257 21 131 134 142 68 189 257 222 
31 361 257 482 
132 144 179 474 309 86 286 92 22 271 327 
269 346 134 199 126 434 483 
179 11 311 203 72 90 
439 410 22 214 163 
271 455 104 340 24 290 174 153 
455 104 340 362 309 244 62 429 
63 358 127 453 203 415 426 392 393 458 129 
132 458 191 273 257 97 32 
63 362 309 127 200 415 205 
265 191 257 392 310 336 257 260 
257 35 11 134 59 257 366 341 
458 351 316 62 263 
92 151 45 139 434 
46 362 309 127 89 172 
241 22 61 87 
455 47 423 309 177 264 458 468 205 
265 11 127 257 451 309 319 
12 341 133 250 271 367 68 
92 462 323 238 19 234 237 62 75 
257 80 151 251 309 244 62 217 
179 22 96 50 
455 351 113 340 282 453 
45 257 281 462 189 
265 346 257 126 107 118 234 184 
63 106 474 272 317 
46 104 340 362 41 139 
257 164 462 203 2 
455 103 179 11 460 244 378 
269 346 199 63 288 473 
271 270 191 445 485 
257 133 131 340 86 199 191 453 189 
63 106 474 309 104 242 84 
38 265 346 257 165 
271 29 338 250 332 23 383 
269 191 273 453 309 311 
458 129 458 497 408 271 289 28 
231 353 309 153 257 338 
46 273 362 309 55 
14 462 453 309 104 205 
63 47 309 311 254 227 257 28 458 129 
132 265 346 257 118 257 239 
143 105 434 188 173 
63 4 134 71 300 475 205 
347 63 47 309 59 269 63 358 59 269 
132 269 346 268 332 23 466 
63 22 264 324 179 22 
269 11 244 428 33 
335 32 464 434 47 
257 91 287 271 29 28 268 257 60 
458 88 379 68 
29 23 265 455 110 458 131 62 357 259 
10 129 458 473 309 258 
265 35 11 125 244 378 242 34 
455 296 453 309 244 269 
426 33 462 453 309 218 
63 22 316 234 201 29 
242 33 458 250 428 258 
179 106 474 309 104 270 
347 269 431 455 11 19 269 
242 462 62 366 165 
257 165 131 340 384 92 
271 270 175 344 152 116 203 53 346 253 
231 129 269 191 62 378 415 139 327 
104 340 483 46 4 
269 191 134 274 69 265 25 202 460 244 378 
242 462 426 429 309 104 269 
405 191 62 67 117 401 
46 358 273 282 269 227 458 129 
179 122 47 309 104 227 185 
455 483 242 462 67 107 458 129 
57 257 162 131 340 244 245 
132 269 462 41 176 309 177 
84 63 47 269 227 
63 474 185 448 
63 106 152 414 242 
132 455 473 309 408 269 62 6 
271 186 120 22 491 
455 103 265 346 257 384 336 269 
455 191 270 336 493 
242 462 257 126 107 260 234 286 
269 346 41 442 234 265 
265 191 62 496 270 
269 284 127 62 50 441 
38 428 151 493 336 29 329 
242 462 67 117 234 286 
242 462 351 62 260 458 129 
335 458 202 244 269 475 92 
45 269 131 340 311 
257 341 477 129 
257 170 175 495 309 331 233 203 394 80 
257 387 325 191 257 126 107 458 129 
30 452 181 462 298 
242 462 199 63 129 
271 29 327 22 356 
302 133 497 134 127 180 
63 358 47 309 349 
242 462 62 496 115 
38 428 47 273 249 265 
458 131 38 231 88 
63 358 127 197 458 129 
63 483 269 346 72 107 181 458 129 
257 465 204 269 471 340 
179 104 340 86 265 
269 175 306 62 391 264 
438 387 153 175 134 152 209 
458 346 96 257 392 
92 191 423 309 269 231 129 
458 214 462 62 380 336 1 346 354 368 
63 121 309 311 
257 302 66 175 64 257 482 
265 462 62 117 239 
257 215 287 271 289 28 
132 458 373 460 282 30 429 
179 351 131 340 362 184 
455 106 474 309 47 428 258 458 129 
455 483 231 175 62 357 429 
132 257 141 175 64 242 
265 122 244 62 489 33 
269 191 62 50 118 
53 269 191 299 
63 151 62 341 336 257 434 458 129 
269 131 134 153 205 
269 346 33 309 59 265 
126 434 104 340 
62 63 104 134 96 293 205 
231 131 134 47 317 
335 63 4 305 458 129 
458 129 257 120 250 71 300 
458 11 273 127 223 
29 222 129 179 22 437 56 120 
265 122 127 332 107 
265 346 152 174 210 
269 346 220 458 129 
231 462 371 233 297 463 336 257 281 
63 113 340 408 46 394 258 
334 133 495 68 
458 191 335 226 309 438 27 303 
63 151 62 357 366 393 458 204 
257 170 202 134 68 
265 346 227 455 362 309 104 
335 46 47 309 472 62 263 
257 341 175 129 269 11 160 
269 191 257 451 407 262 257 400 
199 462 96 107 234 184 
134 489 18 242 389 191 308 257 21 346 320 
242 393 175 29 434 
455 122 127 198 309 258 46 264 
257 212 342 214 331 444 208 38 1 
46 86 14 46 151 
269 346 469 231 129 144 257 297 447 
455 103 455 351 474 245 
455 497 47 152 257 451 270 
265 462 134 257 443 
455 47 340 249 205 
354 93 47 134 36 265 91 
269 346 453 309 127 446 264 
242 191 257 392 401 63 497 282 38 269 346 62 357 401 
179 129 179 104 340 19 289 123 
471 340 127 198 309 311 234 62 217 
278 309 71 234 277 132 175 323 19 
257 91 462 54 309 127 209 156 
242 115 471 340 127 394 446 
265 462 426 165 458 73 
370 133 47 129 257 253 202 319 189 234 439 105 
257 253 202 121 234 105 
132 216 390 47 226 271 345 
257 437 191 340 337 
269 346 45 446 475 257 281 458 129 
257 368 191 340 251 309 244 394 452 345 156 
62 295 250 152 251 203 257 374 464 418 
38 458 346 134 257 49 270 
455 96 104 134 362 309 282 9 242 458 129 
269 191 257 451 160 234 258 
257 49 130 462 309 417 233 
455 351 104 340 86 199 265 462 
242 191 423 458 73 
63 47 271 29 400 24 233 
63 284 47 152 453 309 257 424 321 
202 269 311 203 434 
455 86 257 488 38 455 4 258 
269 191 62 274 463 234 257 219 458 129 
29 133 131 340 68 
455 4 351 127 89 172 458 129 
423 24 265 458 129 
132 101 462 101 
455 188 458 346 220 234 269 
63 432 134 453 309 86 487 260 33 
455 11 127 227 291 458 129 
31 462 343 234 297 378 
347 179 104 340 179 284 
257 370 170 203 479 129 269 202 47 271 367 68 
234 257 456 33 455 103 46 358 47 184 234 62 489 33 
63 227 293 309 35 234 173 
257 465 191 79 309 408 332 146 
455 104 340 86 199 191 129 
227 275 47 309 218 309 72 384 458 129 
38 265 346 107 
257 476 399 191 203 150 
179 73 265 179 22 371 383 29 195 203 257 443 132 353 309 408 394 28 
455 104 340 47 205 344 458 129 
63 4 134 188 269 
126 22 209 381 
242 462 30 50 413 336 159 231 129 203 62 477 209 415 257 159 
257 377 22 226 309 62 302 
455 460 188 265 
265 346 251 309 244 105 
257 219 250 271 367 68 
269 122 127 438 456 25 
455 104 340 483 269 346 453 309 244 265 196 33 458 129 
246 329 47 339 454 
458 214 202 134 177 69 458 251 309 127 116 
31 346 150 462 309 35 189 257 247 156 
257 80 250 152 54 309 384 156 
257 170 175 64 265 
341 133 47 64 237 222 
133 495 309 408 332 28 
458 129 458 278 309 314 343 
185 29 120 22 491 203 257 190 207 
455 106 152 414 269 324 
257 370 404 234 367 138 354 368 345 
265 191 446 458 129 
455 131 269 456 115 
63 106 474 309 119 265 
265 163 269 231 129 
465 133 497 134 127 180 234 68 301 
179 131 47 289 28 
455 473 309 2 233 231 129 
63 104 134 188 13 91 
257 185 195 47 64 257 482 
455 497 134 282 269 453 
132 265 191 134 257 443 
63 432 134 295 254 394 348 257 477 129 
257 85 495 
132 202 340 46 86 269 
210 431 340 55 
265 191 340 257 291 60 
46 282 96 9 269 231 129 
174 210 471 340 59 89 227 231 129 
38 242 462 62 67 486 162 
257 425 364 462 62 337 40 
62 263 497 218 240 176 240 376 
132 269 191 340 257 97 
257 76 387 250 62 463 405 
347 63 104 340 104 265 63 358 104 269 20 257 281 462 469 
455 129 455 131 340 86 
72 160 191 64 
11 458 104 269 32 
255 346 470 169 495 309 68 
455 362 309 311 415 46 
269 346 152 270 118 37 30 
46 47 309 401 415 269 458 129 
458 250 271 328 
147 462 257 456 118 46 362 309 104 
269 346 24 62 496 281 234 184 
101 462 50 458 129 
231 436 442 156 
242 462 107 311 
179 119 257 97 482 
185 29 195 214 151 116 
132 452 327 
347 179 104 335 92 11 127 271 165 
38 231 129 455 86 
179 468 184 63 432 453 309 258 46 
458 131 340 408 205 
84 57 462 134 257 33 
227 329 315 257 281 189 62 167 
257 477 131 134 153 257 195 
257 260 462 84 54 234 376 
383 120 22 214 163 
428 250 152 312 336 479 346 21 
63 460 47 62 130 309 319 
265 346 13 263 309 472 
231 353 309 177 69 257 341 202 289 160 257 443 
458 129 257 465 202 47 271 289 68 
438 409 94 190 242 34 
269 346 310 336 257 260 458 129 
257 354 368 
132 455 86 269 346 453 309 218 
257 370 214 404 234 367 138 354 368 345 
265 162 462 309 315 374 217 
269 191 96 50 
458 131 134 408 394 28 
439 317 92 47 436 469 257 236 34 
458 131 340 362 309 127 92 
231 131 340 362 309 244 184 415 233 
179 47 62 391 336 454 
132 63 106 474 309 314 453 
458 7 309 496 114 
62 368 35 191 251 301 
265 346 257 49 130 
458 490 309 47 306 438 341 
257 109 287 271 29 28 336 257 443 
179 284 55 269 
132 179 432 62 357 270 
231 129 271 263 250 152 316 189 69 309 160 
460 428 19 257 313 
455 351 474 257 429 309 337 375 
257 165 191 257 466 
269 11 258 434 
257 133 214 129 
46 113 340 104 265 458 129 
132 179 131 134 91 189 257 207 
62 136 215 299 129 458 497 340 142 68 189 257 482 
63 22 413 309 319 458 129 
455 24 269 264 458 129 
179 22 134 316 398 487 242 217 
269 346 453 309 244 62 489 33 
257 40 447 191 182 381 376 
62 395 263 191 251 192 
132 179 322 179 202 121 220 156 
132 179 104 134 362 309 319 
257 141 175 152 343 257 435 341 203 334 3 335 
179 250 271 289 28 
458 191 427 456 217 
257 330 250 152 437 203 257 211 
257 409 94 53 
199 346 453 189 264 
455 131 134 483 45 
265 346 227 63 47 88 
269 191 351 50 309 349 
455 104 340 483 434 151 134 453 309 362 309 104 101 415 173 458 129 
265 462 308 320 458 468 62 350 225 
455 362 309 349 205 
455 104 340 188 269 
62 285 497 340 127 180 234 68 
38 92 151 271 274 292 
246 47 252 448 
269 191 62 337 60 
270 440 131 340 86 
257 496 253 7 171 
63 356 254 179 497 
265 455 104 340 24 
265 346 257 49 130 269 202 311 
63 11 311 189 242 231 129 
139 434 22 491 
455 104 340 293 332 
179 362 309 349 159 
63 151 453 309 396 
299 159 151 134 251 487 301 
132 92 346 460 62 489 130 309 319 
63 11 47 309 311 189 265 10 129 
28 22 134 316 398 
132 428 129 269 191 62 463 234 16 
227 265 311 234 423 458 129 
269 131 134 408 28 336 257 401 
390 202 134 68 189 257 91 
257 285 353 289 68 
257 171 407 191 36 56 12 38 43 133 
257 21 330 462 460 189 136 
84 63 47 309 314 453 38 63 151 453 309 282 92 
257 236 377 47 152 50 
257 253 11 121 
46 284 104 257 97 
133 497 340 127 142 180 234 68 
269 462 257 291 118 
269 346 257 49 270 88 84 231 129 
92 22 271 28 189 438 102 
334 133 497 134 127 180 234 28 
458 131 134 153 257 329 
179 11 335 127 187 189 257 137 
257 465 497 134 142 127 180 
132 179 358 311 254 
455 96 473 309 305 242 397 231 129 
455 110 455 250 62 357 429 
227 439 22 226 309 62 302 
269 191 340 288 24 265 
269 346 134 265 455 473 309 218 264 
257 451 462 257 81 
179 47 356 13 317 
271 385 28 47 152 318 
257 409 191 251 309 456 62 217 
179 106 96 474 309 282 245 265 
455 351 83 455 191 453 309 305 269 
423 455 4 104 268 269 132 455 103 455 4 282 414 269 
265 191 174 259 38 455 131 269 
242 462 257 118 309 104 
455 103 179 282 269 
269 131 134 177 69 179 22 427 
231 131 134 55 92 
242 191 62 326 225 
269 191 134 274 20 257 207 183 378 
80 151 251 309 456 234 266 105 
63 22 453 234 269 
379 269 458 497 340 319 197 
269 191 134 257 451 33 
62 186 470 169 285 250 271 367 68 189 257 91 
269 11 127 62 50 395 
257 443 191 308 44 
38 265 346 199 458 131 
63 358 351 47 309 282 111 309 269 
265 497 244 62 489 33 
458 495 309 68 289 
63 47 309 282 269 453 
174 210 462 134 453 309 59 
257 370 170 250 271 367 146 268 265 
185 120 22 491 360 257 207 
269 462 62 17 443 458 129 
132 269 191 134 227 333 
265 462 67 107 309 184 
46 106 474 309 47 205 48 269 458 129 
215 38 341 133 316 271 68 
164 133 497 134 127 180 234 68 
257 433 497 134 127 180 234 68 192 
352 486 462 257 270 452 458 288 473 309 305 
347 269 191 340 455 250 309 319 189 415 174 210 
242 462 72 107 263 234 257 400 458 129 
46 104 340 24 309 349 265 203 257 456 217 336 257 281 
271 298 175 344 152 413 
338 444 208 
101 11 218 451 
458 175 134 306 62 452 
242 462 227 455 104 458 129 
390 177 458 161 257 207 
458 497 134 127 180 234 289 68 
31 462 257 97 
393 133 497 134 142 127 180 234 68 189 257 91 
265 191 134 36 56 257 370 170 
179 282 309 349 275 
458 4 472 438 27 263 
265 346 134 453 309 311 
269 4 134 351 218 475 257 164 458 129 
465 133 353 309 68 
179 497 340 188 269 458 129 
265 462 257 291 118 309 104 
63 432 453 309 104 242 291 458 129 
46 351 47 309 282 309 86 173 
159 151 251 229 
257 297 447 462 271 446 
455 188 269 462 62 291 
242 462 426 140 458 129 
257 334 129 257 44 11 121 
269 191 62 496 429 234 184 
269 497 127 41 442 
455 483 458 358 305 
242 462 134 62 260 
132 455 202 24 309 47 428 332 146 
265 346 199 458 204 
269 11 127 62 357 118 309 104 
455 96 131 177 265 
38 335 271 159 
271 265 346 134 58 
438 387 497 134 127 180 234 68 
62 395 295 462 251 53 
269 131 340 408 394 385 28 
257 31 21 214 131 134 68 
63 47 309 59 265 
455 4 134 188 257 277 202 104 242 
455 473 233 309 282 428 258 323 129 
455 250 309 104 257 392 455 497 38 455 497 340 197 280 
132 269 346 41 442 
63 47 309 472 459 
132 269 183 271 345 
38 455 131 340 362 309 104 265 
63 432 453 415 62 39 393 
269 191 340 174 392 396 
62 35 462 413 234 374 34 
269 191 62 391 336 311 
28 471 340 127 209 487 144 257 35 
132 179 473 184 309 104 269 
92 191 423 455 497 104 268 269 84 
92 47 152 271 327 458 129 
257 470 169 129 269 250 271 367 68 
455 104 340 483 63 4 282 414 30 260 24 242 
92 346 271 429 
242 462 257 297 115 336 257 157 
455 104 340 372 86 
92 191 271 68 475 215 37 133 
179 47 309 349 257 325 
179 353 309 408 289 28 
63 104 340 47 205 
46 47 309 197 269 485 
132 63 293 62 263 
231 129 231 250 271 29 28 
265 11 127 41 442 
231 351 175 340 306 
265 346 134 67 76 
455 202 24 309 349 434 458 129 
341 133 131 134 68 142 
347 179 104 265 455 188 179 11 127 306 469 
257 263 191 251 
405 210 462 197 
257 146 497 134 127 142 36 56 257 277 346 90 
63 110 179 250 436 
265 462 251 309 121 
63 432 288 45 337 
271 263 175 152 316 203 265 443 
269 462 33 309 319 309 409 
269 191 340 161 458 129 
269 346 62 50 315 
29 28 22 340 318 
63 106 152 198 309 104 265 
179 86 231 129 
269 346 134 174 263 
266 151 341 133 
132 104 340 55 92 
92 22 62 391 336 327 
455 362 205 309 86 265 
63 293 257 466 458 129 
269 346 134 257 384 336 257 424 234 184 
257 91 191 134 316 398 
92 191 271 68 56 257 21 
458 129 458 250 271 29 146 
269 346 257 126 107 118 309 46 
63 96 293 242 248 
179 131 134 417 257 330 346 153 37 29 28 
455 373 47 152 257 49 270 
455 296 453 309 47 309 2 189 242 334 379 173 
231 202 134 408 233 153 
428 434 131 340 408 286 62 429 231 129 
265 346 227 63 432 8 309 104 
269 346 134 174 165 
269 346 33 309 315 62 387 458 129 
133 22 251 309 417 332 146 301 
132 455 47 62 259 309 104 
456 115 231 191 40 
132 265 191 324 
455 483 63 284 104 332 458 129 
76 434 151 67 357 
46 113 340 153 270 
405 455 483 455 182 174 392 397 
257 395 462 54 192 
455 483 269 346 50 
257 450 462 308 44 
132 269 346 134 203 481 
257 465 175 495 309 68 
242 462 426 172 84 
179 11 293 268 62 217 
455 358 351 319 38 2 174 260 
257 260 11 134 127 316 485 
63 106 235 306 458 129 
257 476 11 486 95 443 374 217 
257 294 462 54 234 376 
455 131 269 139 492 18 
455 296 453 309 121 415 265 
92 22 271 385 28 128 
269 131 340 153 257 365 
212 195 22 427 
335 269 358 127 62 496 115 
438 297 191 209 190 242 115 
231 381 183 233 27 210 
242 462 134 62 117 118 270 129 
269 191 351 24 456 33 
46 202 340 188 269 132 434 473 309 218 
215 495 309 68 
257 470 169 353 309 68 189 257 91 
269 436 62 464 105 381 
38 423 191 257 97 32 
257 387 346 153 175 134 127 209 56 215 
46 122 177 269 346 62 391 336 466 458 129 
458 436 185 492 18 
257 341 57 64 257 91 
257 295 462 251 374 34 
455 351 86 455 4 104 269 32 
395 159 151 251 156 
458 73 265 354 368 312 202 47 309 401 415 265 181 
269 346 62 96 357 33 234 184 
35 159 22 134 251 487 376 
231 346 45 39 458 204 
257 341 4 160 257 295 
277 10 322 370 19 456 115 
455 104 340 483 179 250 62 437 189 224 
132 455 483 269 346 134 469 344 
45 63 230 401 415 269 
30 407 191 413 156 
269 346 288 453 309 127 189 92 
455 473 257 325 
242 263 462 134 357 458 129 
45 423 462 17 264 
257 169 497 134 127 180 234 68 
242 462 174 101 
257 91 129 257 407 183 378 203 257 456 464 105 
458 307 309 127 62 310 336 242 
231 468 87 
455 86 179 432 453 309 104 62 357 259 
455 362 62 403 154 129 
265 462 134 251 309 127 62 165 
455 96 96 96 473 309 305 242 217 
455 351 103 455 4 314 269 453 
242 462 62 496 315 234 173 
438 153 191 134 318 
455 106 17 428 337 375 
242 462 62 50 130 309 384 257 115 
230 127 62 117 401 
63 131 340 71 197 189 476 
53 346 247 11 127 316 398 301 
458 462 83 309 47 212 317 
269 346 62 117 101 458 129 
493 47 152 64 
455 106 152 414 62 391 291 84 
257 317 22 134 491 
455 86 63 202 47 
455 273 183 394 466 475 205 
92 462 271 59 
439 241 436 381 
455 86 455 296 291 458 129 
269 191 134 99 69 62 263 202 127 180 
63 460 47 257 259 38 63 151 89 311 84 
84 459 175 218 
452 346 90 495 68 
458 404 234 258 189 192 
179 432 67 357 400 
133 131 134 142 68 189 257 222 
265 131 340 59 265 
455 296 453 309 472 269 
374 281 462 374 281 
458 191 273 249 32 
458 250 152 79 324 132 175 288 353 
231 250 271 317 
390 131 134 142 68 189 257 128 207 
269 346 62 50 140 
334 133 497 134 127 142 180 234 28 
257 393 129 269 11 160 257 295 
455 296 453 309 282 242 168 
46 305 84 234 374 115 
455 131 340 315 242 458 129 
212 434 22 427 
104 63 293 227 242 
257 334 462 251 309 486 374 115 
257 370 170 131 134 142 68 
63 104 340 349 265 89 227 
132 203 257 384 92 191 271 401 
257 470 169 322 257 25 192 
242 462 257 130 63 11 121 309 319 
439 492 151 62 489 33 
269 191 33 234 286 
455 358 483 268 269 
257 341 495 309 68 189 257 295 
269 11 127 13 451 407 
270 330 191 491 
63 11 121 242 
455 47 273 111 123 
188 184 458 129 
269 462 486 309 257 398 
458 131 340 293 196 33 
455 250 273 152 203 257 136 185 144 257 451 71 
257 141 175 62 369 
383 317 22 214 228 257 491 
257 387 191 92 41 
458 129 383 410 250 235 152 163 
257 283 303 250 271 367 68 
455 483 269 346 474 19 
242 462 351 62 325 63 106 152 187 203 242 115 298 129 
455 483 179 284 127 52 309 2 
29 133 47 361 493 482 
405 151 446 
63 473 242 397 38 63 474 269 
63 104 340 483 265 346 96 257 443 
269 346 257 456 452 38 46 104 340 282 30 437 487 374 115 
458 473 309 305 269 
455 296 134 453 309 282 92 89 227 
269 346 134 265 117 62 401 458 129 
455 273 110 455 202 127 24 265 
231 191 209 229 
257 477 131 134 408 394 289 28 
269 346 227 63 4 104 458 204 
100 231 431 134 46 86 
242 191 13 297 305 
234 241 269 346 13 49 429 309 282 9 171 346 294 
455 473 309 319 415 233 
269 191 33 309 82 189 
133 203 422 129 
134 227 365 350 462 357 
132 387 462 451 
269 191 340 62 165 
257 215 91 175 340 152 316 398 
269 346 257 97 259 458 129 
324 46 250 49 270 
455 296 203 62 50 325 458 129 456 217 
231 353 309 408 394 289 28 
179 362 309 349 286 396 201 29 
63 230 104 332 234 459 
269 191 62 96 357 397 458 129 
132 458 131 340 408 394 28 
257 350 85 386 173 240 290 
269 175 134 152 356 344 
234 492 231 204 
455 86 455 4 2 415 205 
269 346 310 336 257 44 
4 269 104 269 242 33 
132 455 106 152 300 475 265 
455 104 340 96 86 458 129 
84 179 362 332 
84 179 373 127 163 
231 202 134 408 233 456 153 
455 296 453 309 244 257 396 309 173 
92 191 271 367 68 475 257 12 170 
132 80 284 315 451 
335 92 346 233 29 165 
242 462 340 257 384 
269 346 134 240 39 240 269 284 127 
455 296 442 234 311 
458 129 458 175 271 29 28 
271 28 22 322 
455 284 127 227 291 234 257 374 260 
458 64 227 482 
257 154 66 175 318 464 28 336 58 170 345 
455 104 340 483 455 497 104 332 
269 346 134 257 384 336 257 424 458 129 
132 63 22 427 189 257 130 
257 476 169 129 269 250 271 68 
455 104 340 483 63 358 47 62 165 
179 22 257 97 195 14 250 218 324 458 129 
242 443 202 127 62 357 315 
455 131 340 2 174 260 
463 462 107 
455 47 288 473 309 218 264 231 129 
30 35 462 413 234 156 
63 4 48 257 448 
242 462 62 50 441 
257 29 329 214 119 327 
455 96 104 340 362 265 231 129 
257 459 175 218 
257 241 22 209 376 
347 455 296 134 89 257 136 455 104 340 372 314 485 415 269 
179 432 460 264 
38 455 483 46 104 41 
266 119 409 
257 451 91 462 251 242 34 
49 455 4 104 265 
257 137 191 382 192 
132 269 191 351 62 110 
455 362 309 396 257 392 
257 341 175 273 209 62 395 91 189 95 44 
455 106 288 356 62 130 458 129 
257 350 85 131 340 153 257 299 
215 131 134 68 
257 170 250 271 29 28 
271 29 28 22 142 128 
257 150 346 35 462 134 395 
92 22 273 249 32 203 398 
257 21 285 131 134 142 68 
132 444 208 191 88 254 
179 202 91 205 309 257 390 
227 129 269 202 134 
458 353 309 153 205 
72 160 191 161 
203 394 443 257 370 431 340 288 282 95 130 
270 462 103 458 129 
265 346 257 49 165 458 250 
465 133 497 134 142 127 180 234 68 192 
63 151 62 39 393 38 62 425 393 
92 151 275 46 47 309 104 
458 495 309 408 289 28 487 257 44 462 469 
257 70 497 134 127 180 234 68 
179 351 362 46 309 282 254 336 13 130 
458 191 257 330 336 257 434 
439 434 22 491 
265 346 257 130 309 305 269 458 129 
257 80 151 309 456 487 192 
265 346 257 118 265 462 67 107 
92 346 271 137 
265 346 182 254 84 
458 17 203 257 451 447 336 257 186 486 
179 474 199 179 473 
269 462 316 485 336 257 78 346 136 400 
265 191 423 231 129 
144 227 265 346 199 179 104 
458 462 257 451 328 494 309 244 333 203 444 208 
46 351 273 86 203 242 260 458 129 
215 133 497 134 127 180 234 68 189 257 496 343 
179 11 104 199 179 362 
269 250 203 257 236 
242 462 351 24 257 43 181 458 129 
179 11 2 240 489 240 92 462 62 378 38 257 33 
458 129 434 202 134 127 427 487 179 151 209 475 257 302 
455 296 273 446 
428 273 472 269 172 
458 131 340 362 309 315 
455 296 453 309 408 269 62 357 437 
179 106 474 309 305 270 332 397 
299 159 22 251 442 301 
458 131 340 282 199 458 473 
269 497 244 62 430 
246 400 151 491 
63 293 309 59 269 
241 22 412 269 
257 165 462 63 151 43 231 129 
271 270 202 177 265 
265 191 340 62 165 156 
231 497 134 127 180 53 234 332 68 
234 257 456 383 492 458 175 152 62 380 336 257 158 150 
460 269 346 62 35 
14 462 309 349 242 414 
434 104 340 188 269 
458 191 273 116 203 265 443 
231 316 271 68 376 
458 131 134 408 28 142 
455 473 309 311 189 269 
265 346 257 467 130 
265 346 257 130 63 2 
242 462 453 309 127 62 337 294 
455 4 320 227 493 275 
203 422 257 164 109 250 271 367 68 
60 269 257 323 140 265 497 340 
231 495 309 68 289 
257 298 191 134 209 
455 483 179 432 257 392 393 203 257 78 
215 250 271 289 28 
476 133 353 309 68 
265 91 214 497 134 127 36 
132 458 353 309 68 289 
63 151 220 234 13 417 
455 106 152 8 309 305 269 234 62 489 33 
63 131 340 282 173 
269 129 185 241 22 491 
458 497 134 127 142 180 234 68 189 171 
257 409 11 121 53 
11 179 396 309 257 450 
265 346 257 49 118 265 346 88 458 204 
63 47 269 84 458 129 
455 104 340 362 309 177 332 23 455 284 
231 175 273 152 197 
269 346 62 50 50 302 
179 471 340 55 184 84 231 129 
351 2 30 357 447 38 244 269 475 92 
31 346 470 169 353 309 68 189 257 222 
63 358 349 69 92 346 394 59 203 265 
257 441 462 84 99 240 459 441 
455 288 293 257 466 
179 22 427 229 
257 338 191 270 
45 269 11 127 257 97 118 
179 131 13 259 
132 455 104 362 257 28 309 127 291 
458 287 269 62 357 6 
257 341 175 117 278 234 257 416 
179 131 134 408 29 28 
277 10 175 353 
265 90 250 271 367 68 
179 151 83 309 127 445 379 409 
185 410 22 128 163 
269 214 175 62 435 341 
265 191 340 125 
46 113 340 59 205 
132 179 129 266 332 434 122 214 47 152 163 
257 70 191 251 309 181 62 295 242 217 
179 214 24 309 282 13 130 
257 81 353 309 408 394 29 28 
335 32 179 373 134 
150 11 47 309 35 189 428 241 
265 11 127 271 165 
390 22 220 309 223 205 
458 191 134 54 309 2 242 217 
179 104 134 47 309 104 242 
92 346 474 309 127 62 59 
237 454 47 134 152 356 
480 11 119 255 
257 150 462 125 309 35 189 269 381 242 115 
215 497 134 127 180 309 68 
63 351 293 309 314 220 189 269 
455 296 453 309 319 414 269 
455 351 103 455 296 134 270 336 205 
269 122 134 127 41 442 
132 231 129 231 4 134 65 
31 250 271 367 68 
257 419 462 54 234 156 
347 179 250 340 276 455 483 63 202 47 306 
179 131 134 408 62 33 336 450 
202 455 127 198 309 104 269 257 291 130 
455 104 340 483 63 362 309 282 9 237 62 325 
265 122 273 311 
455 497 340 258 205 
265 11 244 62 391 336 33 231 129 
455 362 309 127 62 310 336 257 393 
185 241 22 214 427 
265 313 11 121 
455 47 309 104 174 311 458 129 
265 346 62 118 336 257 236 
179 287 271 28 336 257 407 
132 265 202 127 41 442 234 286 
63 104 340 24 199 63 349 
458 278 309 408 62 350 225 156 
257 91 287 271 332 28 
16 346 141 1 
246 195 388 309 257 211 
28 336 257 192 407 22 134 322 
179 284 127 209 264 
133 92 497 134 127 180 234 68 
269 175 423 309 104 415 265 
455 296 264 309 207 154 458 129 
92 214 191 271 367 68 475 257 370 170 
455 351 362 309 282 203 38 2 
455 351 497 340 282 269 337 
126 434 86 14 179 151 
257 263 191 291 
257 410 497 340 142 127 180 234 68 189 257 91 
257 76 170 129 269 250 271 146 
231 306 272 336 493 375 
257 334 346 263 191 251 
455 47 340 152 198 309 104 242 234 62 489 33 
269 346 351 62 477 231 250 
241 460 250 103 
455 351 104 340 483 455 497 231 129 
132 269 202 127 62 357 396 
132 63 432 453 309 282 92 
133 129 271 270 191 116 
63 250 62 50 451 447 
269 191 257 451 463 336 257 115 234 246 400 
242 284 319 309 257 384 336 269 
458 175 344 309 127 124 
63 104 340 362 309 244 257 348 458 129 
63 358 349 69 255 431 
46 17 185 492 
269 191 134 99 347 179 202 
179 22 134 116 56 215 
92 191 428 357 350 229 
212 241 47 152 116 203 257 207 
257 465 250 271 68 
45 179 356 30 130 
271 270 436 336 257 77 
455 104 340 349 394 165 264 
257 470 169 250 271 68 189 257 222 
455 351 483 458 473 309 305 
46 4 288 218 197 
335 30 38 30 
46 4 60 269 57 
265 11 134 59 
38 269 462 134 469 
269 346 62 330 346 424 264 231 129 
92 346 423 309 127 17 
63 227 362 309 86 332 
231 346 306 257 424 321 324 
46 113 340 177 196 
269 129 269 202 305 257 35 
113 340 305 231 129 
104 455 483 455 4 305 
242 462 72 107 369 
132 269 346 474 309 104 265 
434 4 177 199 179 362 
377 195 22 427 
13 153 462 67 107 309 205 
455 96 473 309 305 242 294 405 458 129 
271 141 191 116 
458 175 340 468 184 
257 165 462 265 46 113 340 96 153 205 231 129 
63 288 47 152 
265 131 340 59 
38 455 11 314 220 487 63 104 
455 351 362 309 258 205 
92 462 340 38 92 471 340 127 
265 191 240 337 240 269 474 
63 183 205 254 176 
455 483 458 358 2 
63 202 47 436 234 265 231 129 
455 483 63 432 453 309 127 227 291 
92 191 271 118 
275 351 131 340 311 234 286 
269 191 340 72 181 
269 346 146 265 434 284 47 
458 358 127 92 231 129 
458 353 309 68 189 13 80 
63 362 257 457 309 319 280 231 129 
84 179 47 459 
265 346 310 336 257 101 
63 362 309 258 269 309 104 265 
458 175 344 309 119 482 
63 358 104 428 336 269 
62 455 47 152 92 
132 179 129 271 270 250 436 
242 462 196 446 
269 346 62 117 463 234 286 458 129 
458 462 460 270 336 286 
63 22 45 337 309 463 
458 175 250 205 324 
231 353 309 408 28 
12 390 250 271 367 68 
95 90 11 127 413 485 301 
179 335 404 215 
257 123 230 384 
458 191 427 439 105 381 
92 22 271 29 28 142 
265 462 227 179 4 104 
455 106 152 290 269 3 455 474 264 
38 179 483 423 336 269 
455 483 227 185 47 62 429 
46 288 362 309 47 227 439 336 205 
16 57 151 134 52 309 35 37 71 
38 265 346 152 351 257 443 
63 11 311 234 265 
38 458 346 257 398 119 336 269 
159 22 209 144 257 137 382 229 
63 351 362 205 309 472 459 
270 191 209 379 289 345 
455 106 152 67 337 
242 462 134 62 318 
159 22 251 405 
242 462 257 456 33 
231 462 251 309 267 415 95 211 
231 307 309 244 257 429 
455 287 173 62 71 234 257 466 
242 462 134 257 384 336 257 44 458 129 
265 346 257 130 179 47 288 152 
265 191 257 126 107 118 
455 202 340 104 269 234 466 
265 191 134 62 165 189 156 
271 35 191 251 301 
231 250 271 367 387 
455 86 265 455 131 340 
439 29 400 151 214 491 
257 169 287 464 29 28 
257 416 11 218 
227 22 209 381 192 
139 478 250 251 323 59 
458 175 250 271 350 336 173 3 
257 341 131 134 142 68 189 257 80 
455 483 63 151 453 309 282 92 
179 432 453 309 218 254 336 269 
269 346 50 309 349 205 
257 393 131 134 142 65 62 60 475 257 359 326 
455 86 458 346 257 392 203 257 78 
13 19 191 50 
28 336 257 298 411 22 134 322 
458 431 411 309 218 203 
257 238 133 250 
63 103 458 346 291 
63 358 121 309 311 89 269 
265 122 59 242 217 
84 257 334 175 316 265 263 234 205 
257 393 17 185 336 95 456 439 375 
46 474 309 55 205 324 179 82 
269 431 340 47 309 311 265 130 
46 113 340 104 196 
185 434 22 163 
133 495 309 68 189 257 91 
383 434 22 427 
257 195 460 445 22 
455 188 173 10 129 
455 86 455 4 288 60 173 
269 346 96 62 489 437 
215 133 202 134 68 189 257 91 
92 191 271 289 68 
46 104 340 47 309 2 
203 484 57 269 108 56 185 448 
179 131 340 456 489 
132 92 191 214 357 350 234 257 239 
257 354 368 175 495 
455 362 46 309 86 458 346 273 442 
257 162 183 332 23 252 492 
269 131 340 244 489 
265 346 199 63 86 
257 443 462 84 308 215 44 
132 347 63 47 309 63 11 
179 22 8 309 282 184 309 244 205 
179 104 340 24 199 179 349 
455 104 340 362 46 309 282 163 
455 104 340 86 14 175 269 458 129 
347 458 462 88 245 257 393 269 202 340 127 257 451 33 
38 455 362 309 104 269 
455 110 63 22 453 309 319 254 336 101 231 129 
426 260 191 134 257 97 
63 86 265 31 462 62 357 338 458 129 
132 242 373 134 127 13 456 429 
174 387 462 453 309 127 92 
63 151 310 336 257 141 
271 375 22 309 127 182 156 
189 229 212 434 436 
132 458 175 340 306 257 243 
38 458 373 47 465 
246 400 47 62 429 309 315 
63 151 257 317 336 243 
231 129 257 80 22 251 309 456 227 217 
458 204 458 273 287 269 196 110 
257 410 497 340 127 142 180 234 68 
265 346 438 263 257 299 129 
458 129 383 434 22 163 
455 483 269 462 453 309 127 357 396 
62 263 462 134 251 487 381 242 34 
92 346 152 423 
269 346 438 40 424 321 
458 346 182 203 208 
132 265 91 191 134 36 
455 358 104 265 458 129 
496 80 22 134 251 324 229 
257 341 250 271 68 
63 358 351 282 189 415 269 
458 175 340 306 264 3 
347 455 296 357 455 358 127 92 
257 165 462 265 458 113 340 71 
215 131 134 408 394 29 28 
63 47 428 278 458 129 
257 334 346 263 462 251 242 217 
92 191 271 367 263 226 
38 63 104 340 47 62 117 51 393 
92 346 271 293 309 59 
257 465 278 309 160 
179 432 220 189 269 
201 101 175 309 104 269 84 458 129 
455 351 473 309 282 62 71 203 
92 191 340 33 458 129 
179 473 269 332 23 286 
455 131 340 408 173 394 429 309 218 197 
84 458 175 309 348 
455 351 319 38 2 
455 104 340 349 62 59 203 265 389 
266 434 22 427 
179 131 257 97 144 257 260 
455 86 231 131 340 24 265 
63 47 309 258 173 
395 159 22 251 176 53 
269 191 62 357 217 
458 175 311 309 104 92 
455 4 104 428 275 189 257 334 291 84 
46 351 362 332 336 269 
242 462 257 392 259 46 497 47 
179 104 340 188 203 423 
455 86 455 296 453 309 127 197 264 458 129 
458 191 291 132 269 373 134 55 92 
242 462 62 385 181 
244 257 236 217 
231 353 309 68 189 257 407 
257 76 193 415 257 263 
377 241 22 491 
231 131 134 142 417 257 159 
455 106 474 309 282 254 
63 47 309 401 415 173 
63 151 134 61 434 458 129 
455 47 271 333 309 104 45 
179 293 309 218 485 415 62 130 309 19 205 
269 462 257 11 336 257 434 458 129 
38 63 104 340 86 
422 175 64 257 482 
271 270 183 173 485 189 269 
179 284 127 124 203 334 
92 11 127 123 458 129 
132 11 265 456 
257 443 462 251 309 456 252 105 
365 133 495 289 68 
458 288 124 309 104 234 29 434 
458 129 51 292 202 267 32 192 
390 151 8 309 59 265 
132 428 151 8 
63 202 47 436 
455 86 455 4 104 227 336 493 275 
92 22 271 29 222 336 123 
455 483 458 351 307 309 282 189 415 438 27 210 
179 106 474 62 50 476 
92 191 340 196 345 
455 131 340 362 309 349 269 
271 270 175 316 62 452 2 412 205 
63 396 234 270 424 
460 461 155 189 257 91 
385 478 193 
92 191 271 367 68 475 390 
84 63 106 474 309 104 269 
269 346 152 62 489 217 
46 131 62 50 259 
479 64 257 91 
265 346 134 162 
179 250 134 152 116 
458 202 134 177 14 250 316 205 
179 293 258 84 
425 326 238 462 62 50 350 85 
265 401 191 322 456 217 
269 175 344 309 127 316 398 
132 269 462 340 62 403 
265 346 199 191 107 309 184 
455 110 269 191 50 458 129 
242 270 490 309 127 271 446 
269 191 67 274 309 286 
438 450 175 152 128 324 
234 257 236 185 105 423 175 
455 86 458 202 134 104 237 62 118 
426 311 462 134 469 
455 497 340 188 269 
63 358 349 69 63 4 104 265 
460 497 340 188 269 
458 191 381 209 475 257 302 
458 250 271 28 336 343 301 
62 350 225 191 161 234 156 
46 104 340 362 309 305 
159 22 251 176 376 
63 106 474 139 336 493 
455 104 340 86 199 346 446 84 
46 351 47 309 103 458 431 340 47 62 357 260 
271 482 22 318 
265 346 291 154 129 
126 478 188 257 294 462 41 337 309 60 
271 298 175 152 413 
347 179 408 485 92 462 271 103 
63 11 2 426 260 458 129 
455 293 309 311 189 265 62 391 
455 250 62 67 107 407 
257 65 462 167 
269 11 127 445 156 
179 218 234 311 
455 483 269 11 127 62 67 486 260 
265 346 438 165 
269 462 62 67 357 294 234 173 
92 191 271 496 68 192 
269 131 340 311 254 265 130 132 269 96 131 340 47 309 
257 215 287 271 29 28 
271 29 146 191 209 
62 263 462 251 324 171 
257 263 191 340 322 487 144 257 260 
38 269 11 127 311 
455 296 264 309 6 242 443 
132 92 346 474 309 127 62 496 130 
179 22 134 249 32 
455 358 408 269 62 437 
63 47 62 50 33 
32 458 287 271 289 28 
257 12 21 129 269 250 271 146 189 257 91 
242 462 62 50 140 
269 346 453 309 127 62 140 379 317 234 428 418 231 129 
151 179 453 309 282 242 310 
458 175 152 67 357 268 265 
63 47 306 117 33 458 129 
231 353 309 408 289 28 
257 21 129 269 250 271 29 28 
257 170 129 257 207 183 378 189 171 
63 106 273 249 394 336 205 231 129 
455 188 63 151 236 257 369 336 271 65 458 129 
455 250 270 357 437 
231 4 197 254 89 394 33 
62 425 285 497 134 142 127 180 234 68 
455 49 362 309 319 172 38 349 174 387 458 129 
455 182 456 171 
63 250 309 244 173 254 
63 47 309 2 257 97 130 63 106 182 257 236 185 375 458 129 
231 175 273 17 72 419 
257 12 21 285 250 271 68 189 257 91 
179 351 183 174 153 
63 293 19 475 452 329 24 257 425 364 458 129 
150 462 54 309 267 32 171 
271 289 28 22 209 
21 133 131 134 142 68 
179 104 340 362 309 119 257 168 
458 250 383 29 317 14 436 
92 191 271 367 68 475 422 
132 92 191 271 303 
269 462 33 309 59 265 
62 263 11 127 316 56 257 384 336 257 115 
242 217 462 50 458 129 
458 495 309 408 289 28 
455 103 242 462 270 
132 265 346 134 13 259 
242 33 191 446 
455 296 134 404 56 174 153 
144 265 441 275 22 134 257 97 458 129 
455 104 340 86 199 11 218 374 
458 408 271 289 28 
350 222 129 185 434 22 163 
179 183 62 429 
257 393 88 479 351 324 257 243 144 266 418 336 311 
179 306 383 375 
13 165 462 134 61 
271 29 28 268 257 443 47 152 209 
455 104 340 483 179 432 291 
231 346 288 189 136 336 46 
455 483 62 391 336 269 175 309 127 61 
242 462 30 315 
455 483 269 462 62 67 357 118 309 104 458 73 
46 104 340 47 309 104 265 
269 497 47 152 332 
179 497 127 445 487 376 
92 191 271 367 164 109 68 189 257 407 
455 293 309 55 290 265 
257 285 287 271 289 146 
179 202 47 437 205 
385 28 22 134 322 
84 4 63 47 426 400 197 
458 346 273 152 145 324 
458 191 468 309 127 254 336 257 338 324 257 384 336 257 441 
179 64 257 482 
139 434 22 145 
269 4 127 132 269 191 340 189 376 
269 497 47 152 62 50 294 
493 454 22 111 56 215 
345 11 127 226 412 394 465 265 462 134 486 458 129 
46 11 273 282 173 
265 346 453 415 184 
269 11 258 233 415 233 456 115 
271 29 434 22 491 
257 325 462 84 446 
455 104 340 47 33 234 375 458 204 
132 265 346 199 455 356 
265 462 13 291 
458 462 134 257 451 
455 103 458 11 127 198 309 218 10 129 
46 104 340 362 309 319 
269 346 237 62 50 140 
458 307 309 127 257 330 
271 270 175 152 427 344 
455 104 340 362 332 
455 483 265 346 67 107 
179 202 408 271 29 28 
257 141 250 64 257 222 
63 22 257 451 309 104 269 
309 184 269 346 62 117 181 458 129 192 
257 299 353 309 408 332 28 
455 483 63 4 282 242 291 
159 22 251 171 
57 63 373 273 86 
46 113 340 75 269 
269 404 234 438 367 417 
231 129 231 250 271 332 146 268 438 450 
455 296 62 489 130 475 172 
179 362 309 218 197 264 
455 131 340 362 173 309 319 231 129 
63 104 340 24 265 
216 215 497 134 127 180 234 68 
138 133 129 179 202 65 309 479 189 53 
257 164 109 202 134 68 
63 4 134 127 310 336 242 207 458 129 
63 106 474 309 314 269 453 
179 104 340 24 286 
46 104 340 483 455 358 104 269 
63 4 47 62 343 429 
257 451 159 22 134 251 324 171 
92 462 271 293 458 129 
45 269 191 340 357 
257 29 204 269 346 134 
455 104 340 349 394 29 130 
257 370 170 129 269 250 271 146 189 257 253 
455 104 199 179 362 
132 265 346 240 337 240 269 474 
132 92 191 270 165 
63 47 62 50 207 458 129 
242 462 134 72 181 458 129 
140 133 47 353 309 68 
458 346 270 336 257 392 400 203 242 260 
38 63 129 14 462 242 
132 92 346 271 263 189 265 
269 346 134 62 443 455 4 6 
269 96 191 340 62 117 401 
458 131 134 142 47 289 28 
455 296 453 309 472 257 126 336 269 
2 462 54 309 121 53 
365 461 214 155 
179 47 436 234 286 
257 395 462 413 234 156 
455 113 340 96 188 269 
455 86 63 4 305 242 281 
455 351 293 309 282 269 38 314 269 
63 432 271 446 23 394 29 380 336 257 398 14 307 309 104 242 
241 362 438 211 
455 131 340 349 265 
458 250 271 29 28 268 257 343 132 129 257 410 202 121 415 257 459 80 
132 269 462 214 62 178 336 248 
80 189 257 496 341 151 308 130 
92 191 271 367 222 336 343 
455 104 340 71 234 466 
455 483 458 497 282 485 
265 191 324 257 243 
63 351 131 340 282 92 203 33 
257 29 380 462 257 425 364 
265 462 257 456 118 63 202 362 309 104 
132 63 358 273 408 485 
265 346 227 455 106 152 198 309 314 280 
455 104 340 362 309 305 347 179 47 309 104 242 231 468 87 
257 170 273 128 257 207 
265 91 191 134 36 
215 22 128 228 257 491 
63 471 340 282 265 
133 131 134 417 257 330 346 153 
257 219 175 64 257 482 
179 104 134 2 201 29 
63 104 134 362 434 309 82 300 458 129 
458 346 152 62 447 234 62 430 
458 251 309 305 
257 409 462 251 309 456 234 185 105 
455 110 269 191 234 257 392 
92 346 152 62 391 336 450 
455 182 174 260 405 
455 131 340 282 394 223 448 
63 104 340 362 309 55 264 
455 103 434 11 408 184 62 429 
179 104 134 47 62 411 
257 439 22 427 
455 473 309 408 257 393 62 429 309 305 
257 80 214 331 444 208 480 38 1 
63 47 271 327 
257 141 214 278 309 160 257 295 
269 191 62 430 18 
455 483 63 358 349 438 392 260 
179 4 104 265 458 129 
63 250 309 305 242 260 
179 129 269 346 134 453 309 127 257 97 
92 191 271 68 475 257 341 309 257 91 
269 191 438 297 452 78 315 
455 202 340 362 309 408 46 62 42 
132 242 175 134 152 257 443 
265 497 134 142 127 36 
242 284 134 127 52 
269 11 127 270 336 143 
132 458 129 271 263 175 152 316 
242 462 233 91 
458 191 427 456 115 
458 353 309 153 394 336 205 
420 169 133 495 309 68 189 257 91 
215 129 252 434 436 229 
257 285 129 
455 113 340 188 265 
132 269 202 340 311 234 173 
269 346 50 309 218 264 
231 131 134 408 233 153 
179 96 24 233 
257 341 462 54 309 160 265 295 301 
458 131 134 267 184 309 408 184 146 
455 362 309 305 269 231 129 
57 255 462 134 270 336 205 
92 151 139 24 173 
84 462 426 33 257 330 129 
455 351 362 309 127 257 392 
455 104 340 372 47 309 483 268 269 
455 362 309 127 92 458 129 
63 47 309 47 269 37 92 471 340 127 62 401 
257 164 109 64 257 91 
257 383 22 209 381 
215 131 134 142 417 394 29 28 
63 432 203 257 291 378 
12 133 250 271 68 
257 317 11 127 163 
455 483 455 497 305 231 129 
269 96 191 62 387 
179 314 184 453 
46 106 474 309 314 453 
257 123 11 273 55 
455 106 474 309 314 174 393 203 257 260 
257 410 64 179 250 17 257 140 
269 131 340 315 265 130 
257 21 285 131 134 142 68 189 257 91 
132 92 462 460 328 309 237 62 411 
179 250 383 336 205 
92 346 423 458 4 104 
455 296 453 309 6 309 305 257 294 
257 409 462 251 309 456 414 257 384 336 374 217 
147 462 227 269 96 473 
269 346 474 309 218 309 62 55 
257 76 16 214 193 309 257 488 
385 28 22 134 209 
341 133 353 309 68 189 257 443 
458 353 309 472 62 395 477 
271 270 4 258 184 92 
269 462 134 265 130 
38 179 22 291 
335 458 17 257 294 
76 133 353 309 68 
458 131 134 65 62 60 371 68 156 
458 129 269 191 438 263 309 218 197 20 458 131 
257 419 183 378 192 
63 432 264 309 19 257 330 
458 250 271 29 28 336 233 450 
63 362 496 221 
179 96 24 201 29 
426 416 277 462 203 67 357 465 
63 230 349 201 29 
63 47 309 396 414 269 
132 458 11 2 32 
215 353 309 68 189 265 91 
265 346 134 256 62 330 
455 250 62 50 115 
63 362 271 123 
62 295 462 251 374 115 
231 346 474 62 39 11 
455 497 340 104 269 335 
114 131 134 142 65 62 60 234 68 189 229 
231 497 340 177 269 
242 462 62 351 396 
455 104 340 362 173 309 319 458 129 
458 131 134 153 394 342 
92 191 271 123 128 
455 483 455 358 71 458 129 
76 133 497 134 127 180 142 
265 91 497 134 127 142 36 
455 86 199 346 453 189 132 455 113 340 483 268 269 
63 284 47 332 336 205 
257 225 462 413 309 384 192 
458 346 8 309 348 438 393 
269 346 257 392 118 234 257 185 336 286 
269 129 12 93 131 134 65 257 77 
455 273 111 309 127 198 309 104 265 
92 11 127 62 326 225 376 
104 46 86 199 462 453 189 
257 222 131 134 408 394 29 28 
231 462 251 309 127 209 374 34 
38 455 131 340 24 265 
38 257 434 346 11 
132 455 460 47 103 
455 362 309 472 62 391 336 466 458 129 
455 362 309 104 269 32 
455 86 269 11 244 62 430 
63 471 340 127 92 
347 46 432 453 309 104 269 46 106 474 309 104 269 89 265 33 
63 293 459 231 129 
269 191 324 38 269 462 84 
481 221 151 54 374 115 
458 129 257 141 11 160 257 263 
132 323 328 462 251 
265 122 244 266 418 
38 63 432 453 309 319 
139 434 104 340 104 265 
315 175 270 369 
455 47 62 67 323 429 
63 362 309 127 270 336 257 392 
63 151 134 453 309 408 485 
269 346 134 220 234 257 76 387 
455 497 288 48 257 466 
269 191 214 257 456 33 
246 22 437 203 257 211 
377 120 151 308 44 
62 285 36 257 91 132 353 309 68 
63 293 428 345 
132 269 191 446 23 265 
132 265 346 134 453 309 59 62 391 336 275 
455 250 271 130 309 282 172 231 129 
452 316 271 367 68 
104 257 291 118 
458 131 134 177 69 458 202 127 116 
275 11 59 231 129 
257 395 35 462 54 301 
234 62 430 265 191 340 62 165 
45 455 11 273 197 300 475 265 
438 172 191 270 336 257 451 145 
132 265 191 185 492 18 
257 70 129 458 202 47 62 263 189 301 
458 191 351 41 357 
455 296 198 309 311 254 
13 61 488 462 214 446 
265 441 122 47 218 
132 92 175 152 323 345 
242 462 62 117 263 458 73 
179 22 427 456 115 
242 462 62 50 130 309 104 269 
383 336 257 16 381 436 
92 346 460 62 391 336 33 
84 462 426 33 309 305 
231 191 309 315 62 496 259 229 
63 432 453 309 6 458 129 
347 458 462 455 362 309 2 
460 210 388 189 
269 351 191 340 174 441 405 231 129 
179 497 351 104 300 415 205 
231 250 271 289 28 
269 346 13 277 458 129 
458 129 269 191 134 
38 92 191 62 165 415 265 
132 63 250 309 319 197 
57 231 191 209 381 192 
458 495 309 68 229 
46 47 309 258 173 
269 183 212 492 132 84 63 432 264 
231 404 215 132 131 134 326 482 
63 214 103 269 11 127 257 456 
143 275 244 62 430 
63 483 458 351 473 309 319 172 129 257 285 
455 351 131 340 104 257 259 
63 351 131 340 86 
46 151 288 220 189 265 
179 151 257 392 336 286 
12 215 250 271 367 68 
269 346 257 392 118 234 227 336 286 
179 22 52 309 65 381 
87 151 134 52 309 319 309 257 389 
269 202 47 152 50 309 71 412 173 32 
45 63 358 47 309 59 
63 131 265 38 63 11 121 
132 428 336 438 27 51 312 177 438 384 175 218 
455 351 293 309 282 111 309 269 
62 496 81 191 251 309 127 322 381 53 
229 191 270 336 493 105 
38 455 483 265 191 62 50 118 
269 191 438 297 336 257 115 
257 169 287 271 367 28 
45 231 183 345 
269 191 257 49 397 182 53 
84 179 411 309 244 173 172 
265 351 431 340 311 
271 270 202 125 71 412 173 
132 458 346 273 306 264 
269 250 340 324 455 7 254 264 
257 434 11 282 199 179 79 234 
458 462 134 453 309 244 62 391 336 33 262 448 
458 431 340 408 46 62 391 336 223 448 
455 351 497 340 188 231 497 2 265 50 
255 346 463 191 95 451 
464 434 483 45 
265 346 20 269 346 33 
269 346 67 107 309 286 458 129 
265 346 341 33 
132 271 482 47 152 316 
257 354 368 35 191 340 154 346 49 165 
38 376 191 351 257 315 
84 458 307 309 311 189 30 
179 131 340 24 265 458 129 
62 395 263 462 251 301 
423 455 4 104 268 269 
377 434 22 163 
265 346 227 455 362 309 177 
179 106 474 271 443 458 129 
89 62 350 225 
269 346 257 392 270 63 47 
215 381 129 257 330 436 
455 296 134 453 309 408 269 197 
62 285 131 134 142 65 62 60 371 68 
242 462 270 260 203 257 78 
455 131 340 282 269 89 227 
45 46 4 349 257 357 265 346 453 309 218 254 336 269 
269 462 62 463 336 330 
257 409 462 309 121 301 
63 47 309 282 111 309 269 
227 63 4 104 462 71 
215 64 179 111 75 
269 346 351 270 336 493 275 
179 129 28 11 127 209 381 
63 47 340 474 72 247 
257 370 285 129 257 120 131 134 65 77 
231 131 134 153 257 302 
455 296 134 453 309 282 9 265 458 129 
257 477 131 134 177 69 257 212 22 163 
62 470 169 477 
63 106 474 309 55 173 
92 22 271 28 189 13 102 
455 106 249 269 324 
395 159 11 127 322 376 
458 353 29 68 
179 358 282 269 453 
101 87 
455 351 362 62 323 258 
455 483 269 346 357 458 129 
92 462 271 354 84 458 129 
257 341 495 309 68 
257 172 90 495 309 68 
46 351 104 340 104 269 
455 113 340 244 205 245 458 129 
435 390 471 340 68 189 257 44 
344 179 214 151 312 336 257 341 
455 24 309 2 415 434 
257 12 170 131 134 142 68 189 257 207 
242 462 257 10 283 303 
455 131 340 362 434 309 86 14 455 191 
246 222 22 209 192 
455 191 404 56 257 476 458 129 
46 288 103 234 242 
132 458 204 455 106 288 473 62 172 24 242 
458 202 408 271 29 28 
246 250 152 437 203 257 211 
257 401 462 54 309 337 374 34 
185 434 47 152 163 
269 129 257 295 191 322 53 
257 397 462 54 234 252 375 
269 346 72 107 263 203 174 210 
179 104 340 372 86 233 153 
84 269 497 127 41 442 
269 131 134 408 394 332 28 
377 434 151 460 256 445 
257 252 22 427 156 132 22 134 116 
270 452 175 152 182 242 115 
132 63 230 134 408 485 
269 346 357 132 269 346 134 50 
92 346 62 290 203 255 231 129 
455 483 269 346 453 309 127 62 50 115 
132 428 474 62 211 315 
415 184 179 251 184 309 305 144 257 451 37 297 294 458 129 
455 351 47 309 121 309 311 
179 129 179 131 340 47 394 
372 62 463 202 340 187 205 9 257 136 383 
92 191 271 367 68 475 257 370 170 
38 46 86 14 63 151 
179 497 134 127 36 142 
271 123 191 142 128 229 
234 62 489 33 269 250 309 104 
257 435 443 462 251 309 456 212 418 
476 169 133 353 309 68 
63 47 62 357 443 458 129 
455 106 474 428 357 278 
269 346 257 291 33 
38 455 483 63 47 
269 346 62 61 263 
269 191 257 456 260 231 202 305 
271 263 191 226 
347 179 104 265 92 471 340 127 394 327 
38 265 191 257 392 270 455 145 
63 104 340 293 243 
63 250 62 357 476 458 129 
265 431 340 59 
179 273 250 62 429 
269 497 127 492 324 179 65 
179 54 62 350 225 234 156 
257 91 497 340 142 127 36 
458 64 257 482 412 173 
63 19 46 189 242 
62 219 285 353 309 68 
231 182 62 357 397 38 455 131 340 
231 129 215 47 495 309 244 62 91 
269 96 431 340 47 265 196 309 104 415 269 458 129 
434 47 250 269 
242 462 72 107 247 234 426 465 458 129 
269 346 62 50 325 
265 346 446 84 
132 458 346 152 45 337 
132 458 468 184 242 191 446 
455 104 340 349 199 257 117 401 462 
179 4 314 269 308 320 
269 346 257 40 217 336 257 281 458 129 
269 462 33 309 55 265 
63 362 309 127 336 258 
257 281 497 127 469 
92 462 271 101 411 458 129 
63 104 340 319 309 205 
269 373 134 311 458 129 
132 265 346 426 224 
257 195 250 64 257 482 
458 351 250 62 50 130 268 173 
265 191 340 288 257 443 
455 103 92 471 340 127 62 165 257 81 129 
139 214 22 163 
84 415 45 139 29 400 203 257 78 269 346 446 
455 60 269 72 247 
269 346 310 336 438 387 458 129 
269 346 453 309 244 428 33 
269 346 214 234 257 416 
458 273 250 62 429 
132 92 462 62 293 309 6 
455 104 340 86 257 28 336 265 458 129 
46 122 483 458 462 423 24 46 
271 270 191 491 360 257 77 
257 434 96 362 269 231 129 
63 104 340 86 14 458 462 
257 488 175 271 416 231 129 
257 212 22 427 53 
203 62 130 458 462 257 248 
455 483 265 346 227 
132 92 346 332 309 104 
84 63 47 383 458 129 
455 362 309 104 143 275 
455 202 47 152 92 203 62 297 
455 104 340 483 46 151 52 309 104 265 203 242 78 
455 103 455 4 314 453 
169 133 497 134 142 127 180 234 68 
132 242 462 174 429 
63 104 199 63 362 
269 191 62 380 336 257 387 
455 110 179 202 258 184 
45 47 216 292 
231 250 271 29 28 
269 346 257 392 118 265 63 4 104 234 227 257 434 203 242 325 
458 191 340 116 
455 483 458 202 362 309 2 184 
92 191 271 367 295 475 257 334 
458 353 309 68 189 394 336 95 28 
132 458 129 458 358 127 197 
458 204 458 131 340 104 269 
242 462 257 434 346 11 458 129 
242 462 257 40 33 
455 351 250 309 314 485 415 173 
257 352 163 383 336 205 
269 191 62 67 107 33 234 233 
215 495 68 
458 497 134 142 127 180 234 68 301 
63 104 134 47 62 401 458 129 
143 151 134 237 327 
242 462 270 336 426 136 400 
38 242 462 257 429 
63 47 309 2 426 392 260 301 
347 455 104 340 458 346 453 309 305 
455 110 63 22 337 
458 351 250 309 282 300 
179 351 104 340 397 458 129 
455 296 134 453 309 408 485 487 257 384 
92 47 152 67 464 327 458 129 
62 330 191 214 163 
257 395 447 462 54 234 171 
179 151 189 409 84 
269 346 134 257 130 455 473 269 309 319 242 217 
231 191 128 203 357 102 156 
215 202 134 68 189 394 336 257 222 
455 47 340 318 485 103 231 129 
455 473 309 47 466 
179 497 340 104 269 379 201 29 
455 104 340 188 203 269 
458 202 340 408 233 153 
347 92 462 41 323 466 92 462 41 196 33 
257 409 462 54 234 156 
45 269 346 62 357 401 
458 131 340 408 29 28 
257 406 137 462 280 
265 284 472 234 62 50 260 
271 289 123 175 152 128 
132 458 497 340 282 286 
269 346 257 130 455 2 257 260 
63 151 134 61 
460 257 476 462 8 
455 106 474 309 160 
455 483 455 4 104 269 458 129 
92 191 271 68 475 31 189 192 346 343 
458 351 473 269 309 337 254 
269 191 340 24 265 
438 477 309 257 70 191 340 209 
132 269 346 271 117 401 
455 106 474 309 320 265 
159 151 309 127 322 156 
80 94 456 217 
455 83 265 458 129 
179 22 427 171 
63 250 271 220 454 
269 346 227 62 61 260 458 129 
242 462 257 416 
12 170 133 250 271 367 68 189 257 207 
370 133 495 398 68 189 257 278 
63 122 273 86 265 
257 213 403 202 214 
133 353 309 408 257 153 336 257 465 
455 351 473 309 218 280 38 166 19 234 81 
208 175 271 291 309 424 321 
370 133 47 495 309 68 189 257 443 
347 63 47 309 401 415 257 165 63 358 401 415 269 
269 462 62 67 107 178 
269 11 127 271 332 
242 115 275 151 446 
257 409 462 413 309 121 53 
465 133 353 68 
179 106 316 62 391 336 466 
455 106 152 92 62 489 33 
455 110 269 191 453 203 
458 129 271 263 175 152 316 69 309 160 
92 151 139 241 
257 206 470 169 477 287 271 332 28 336 257 443 
242 115 191 271 446 
38 269 7 351 203 33 
265 11 218 374 281 
231 131 134 47 28 
269 191 251 231 129 
215 250 271 28 336 257 207 
210 431 134 384 264 
179 474 286 242 33 
269 431 340 47 257 435 341 
458 346 96 453 309 207 269 
63 104 340 47 466 231 129 
455 47 423 309 166 234 269 
242 351 202 340 311 
458 131 134 408 394 289 28 
257 164 109 250 271 367 68 
271 28 22 209 475 257 407 
242 462 62 263 336 257 154 387 458 129 
458 129 179 47 271 317 
63 104 340 362 309 401 415 205 
269 191 257 291 118 309 104 458 129 
63 131 340 47 309 244 269 132 63 131 
132 269 358 273 127 257 97 
458 288 175 152 
428 434 104 340 24 269 
38 265 497 127 249 242 217 203 31 
455 104 340 349 62 165 
269 462 62 130 336 210 38 179 202 134 362 269 394 29 130 
257 410 64 269 
133 129 271 270 191 491 
458 381 468 87 265 31 202 127 438 49 55 
62 295 191 134 251 324 374 115 
63 122 134 127 198 309 48 205 92 
257 169 477 129 49 270 191 437 
269 346 134 257 384 336 257 424 
451 159 151 251 176 229 
458 250 271 367 68 
455 191 340 270 336 205 
63 474 309 349 173 240 63 250 134 249 324 
458 358 104 438 392 415 199 458 175 
269 495 309 408 289 28 
199 175 355 336 286 
458 495 309 408 394 28 336 257 443 
257 186 495 
455 250 62 50 185 105 415 173 
350 222 497 134 142 127 36 
458 131 134 47 394 289 28 
231 129 89 30 369 
104 46 293 309 60 
458 11 65 309 255 189 376 
455 351 104 340 86 458 204 
458 131 134 177 14 202 127 189 257 393 
257 277 462 189 62 164 25 309 255 
269 497 244 266 418 
242 462 134 469 344 458 129 
265 202 134 408 286 257 392 429 309 305 
46 104 340 47 33 309 483 
455 131 340 362 309 483 268 269 
455 104 340 47 62 303 38 455 296 273 453 197 231 129 
242 462 62 65 309 174 172 393 458 129 
455 131 340 362 309 47 62 61 443 231 129 
439 241 214 436 
257 247 191 180 301 
370 133 497 134 127 142 180 234 68 
242 409 462 446 
257 297 71 191 45 50 
62 395 35 191 251 405 
458 202 340 408 332 28 
347 63 104 340 269 11 121 
458 250 64 257 482 
92 22 266 329 265 131 134 
271 455 483 46 432 257 81 
455 202 47 271 327 347 458 7 203 324 184 
63 432 84 203 72 107 389 336 19 458 129 
126 151 52 309 319 189 13 130 
234 184 257 397 191 469 
257 477 131 134 408 28 
4 46 397 205 
38 347 46 104 340 104 269 46 106 460 250 62 357 115 
455 296 134 257 49 270 
63 47 257 194 
132 63 113 340 59 265 
455 104 340 188 458 497 104 265 
265 431 340 258 286 305 458 129 
269 191 134 62 165 
84 458 462 189 438 27 32 
139 22 273 249 32 
62 40 191 251 381 
95 461 108 189 257 350 
30 407 191 54 442 53 
242 11 127 257 393 346 395 281 
458 131 340 293 309 104 242 
335 92 462 456 115 
458 191 427 189 438 65 
269 462 251 309 456 383 105 
366 334 133 495 309 68 189 257 443 
390 129 442 301 265 252 434 22 99 309 47 436 
458 214 129 458 4 104 323 309 55 205 
269 191 134 274 69 257 90 202 127 382 280 
179 358 91 496 146 
459 462 332 107 23 221 
63 96 131 340 86 
469 264 455 104 340 372 47 62 153 
63 468 205 63 131 340 362 309 349 269 32 489 129 
455 103 309 104 269 32 458 129 
265 346 227 63 250 
30 215 299 14 353 309 408 438 153 129 252 194 22 163 
257 35 191 54 234 301 
335 7 257 2 336 257 260 
455 113 340 59 265 
458 131 428 357 275 
63 47 309 47 205 291 84 
458 287 271 289 146 
458 462 84 308 44 56 257 186 390 
179 230 362 309 104 269 
269 346 62 357 141 458 129 
242 462 62 451 234 286 
132 258 191 134 189 257 130 
63 47 62 67 489 130 309 319 
257 297 462 298 
63 104 340 47 354 203 426 389 
269 191 24 62 117 387 
257 433 497 340 127 142 180 234 68 
347 179 282 145 179 282 145 
426 259 462 309 19 227 336 205 
455 284 47 306 257 294 
219 133 497 134 142 127 180 234 68 376 
63 106 474 309 104 257 97 
428 22 468 179 202 127 437 
133 250 464 29 28 
257 294 462 84 234 297 378 
62 341 285 64 257 91 57 
455 104 340 96 188 203 269 231 129 
269 346 134 270 419 265 346 453 309 104 269 231 129 
179 351 497 340 104 269 
12 133 131 134 68 
458 131 340 408 394 289 28 268 257 80 
215 495 309 68 189 257 222 
242 462 72 107 389 
347 458 462 63 358 282 173 
269 131 134 153 394 433 
458 431 340 362 309 104 269 32 
257 330 191 427 192 
126 29 329 47 235 318 485 
231 131 134 326 482 
257 78 131 134 142 65 62 60 234 68 301 
458 191 226 309 302 
38 63 362 309 314 269 453 
62 295 462 251 381 242 34 
347 458 462 458 4 96 258 242 393 
132 458 129 257 33 175 218 
387 312 142 183 233 309 257 302 
257 12 470 169 129 269 191 340 
458 129 458 250 271 29 68 
455 483 269 388 257 130 63 473 
92 151 252 421 
46 106 88 254 41 139 434 
458 462 251 309 127 116 229 
46 106 474 309 188 173 
132 265 497 127 351 257 315 
257 477 287 271 29 28 
242 175 152 453 189 234 428 33 
92 346 271 466 458 204 
390 188 179 22 163 
257 178 284 47 257 395 60 189 265 
257 12 21 353 309 68 189 257 222 
179 362 309 349 46 
426 387 346 101 462 426 27 
455 191 8 309 282 173 254 
257 164 431 340 
265 497 59 374 281 
63 473 242 40 378 
269 202 258 254 62 391 458 129 
242 11 127 271 357 234 158 354 
458 129 271 253 22 316 
63 483 458 346 62 357 494 
265 346 257 345 
242 462 96 107 309 286 
63 47 309 396 269 
46 351 47 309 314 343 203 397 2 
132 269 131 340 456 
257 400 219 131 134 142 68 
272 29 434 47 152 427 203 257 443 
179 250 271 387 264 
92 22 49 185 336 205 
257 395 462 54 309 244 378 189 171 
265 183 487 53 
227 185 151 54 309 127 124 374 34 
257 341 497 134 142 127 180 234 68 
455 460 47 309 311 265 254 
242 497 127 67 107 309 205 
257 70 193 189 246 448 
63 293 309 282 189 415 210 
46 86 199 458 474 
242 462 257 325 63 47 309 59 
79 268 257 419 458 129 455 483 63 151 453 309 305 242 260 
132 265 462 134 58 
458 73 63 104 340 483 242 462 257 33 309 59 257 341 84 
265 346 227 455 473 309 104 
455 106 474 309 104 332 
294 383 462 54 229 
63 104 340 362 46 
269 346 62 310 336 257 260 265 175 309 319 
132 92 462 30 441 
458 436 442 53 
265 191 62 211 181 
269 462 62 357 315 458 129 
455 131 340 483 269 191 58 
132 269 191 340 62 145 
257 91 191 251 309 127 209 242 217 
455 131 340 362 309 86 257 28 
269 191 13 40 407 
63 131 340 305 257 397 405 
257 466 462 340 107 231 129 
62 409 462 308 130 
455 483 446 434 349 446 275 203 446 434 
257 410 47 316 271 68 
439 29 400 214 200 229 
257 44 11 121 374 217 
257 35 36 173 234 30 272 492 203 90 
63 483 269 346 62 50 118 458 129 
269 346 134 72 449 181 
132 434 11 288 362 309 218 264 
257 297 71 462 413 234 376 
63 284 134 372 127 92 132 63 151 
201 183 90 376 
62 295 497 218 203 62 464 105 
62 464 275 235 151 99 
455 47 271 165 231 204 
455 104 340 86 458 468 87 
242 373 127 438 392 429 309 59 265 
291 84 227 179 362 309 104 462 2 
458 462 223 309 104 199 458 307 
458 73 265 257 393 175 271 68 189 257 443 
299 159 22 251 309 127 322 374 217 
84 179 432 310 336 286 
46 4 244 265 309 257 365 
92 346 460 62 429 63 4 282 173 414 242 
257 392 462 344 309 218 
265 462 340 257 443 264 
231 431 340 104 67 196 
269 346 33 234 59 
455 351 362 309 82 189 
455 483 269 346 438 33 32 
257 75 462 134 453 309 396 95 130 203 231 129 
63 24 201 29 38 2 234 201 29 
458 202 134 153 257 338 
269 191 62 496 118 
257 164 214 124 309 258 
132 428 434 351 104 340 282 269 
269 191 340 142 99 69 179 202 160 257 263 
271 269 346 134 220 89 227 
132 257 370 486 191 50 
455 4 2 174 260 
132 455 483 455 296 453 309 472 269 405 
458 131 134 153 257 133 
271 270 4 104 265 
63 250 309 244 345 
126 151 251 309 127 209 56 257 384 336 374 217 
257 466 351 462 340 92 
257 334 129 269 11 181 62 263 189 156 
246 195 64 257 482 
63 103 458 11 134 104 257 97 32 
242 462 438 387 
426 434 293 258 
38 271 195 52 
223 420 247 
242 462 426 451 33 3 335 
132 133 362 332 
257 397 191 270 336 383 376 375 
63 250 309 472 62 263 
89 265 33 257 330 288 316 257 263 
269 351 131 340 311 254 89 227 
265 11 127 249 376 
458 175 62 357 437 
269 202 127 62 117 59 
455 104 340 362 265 
132 265 462 13 259 
271 270 191 491 203 394 143 253 
38 265 191 257 294 
257 12 21 131 134 142 68 
257 395 462 189 171 
92 191 271 367 215 68 189 257 91 
265 122 47 218 
257 12 170 129 120 131 134 486 77 
92 462 62 137 234 269 458 129 
265 191 332 23 383 492 18 
455 483 269 346 453 309 127 62 67 357 397 
227 22 427 456 122 
231 353 309 417 289 28 
38 59 462 357 
38 92 191 423 46 497 104 268 269 
455 104 340 483 179 11 59 265 
257 162 497 244 139 492 
269 346 288 257 97 
455 104 340 483 455 497 274 174 153 458 129 
170 133 495 309 68 189 257 91 
269 346 96 13 263 
63 96 202 24 309 86 199 346 453 189 
242 443 462 84 189 160 
242 270 316 485 234 269 
265 346 134 291 38 455 311 234 199 455 282 
269 191 257 425 364 451 424 321 305 336 257 281 
257 165 462 33 
458 346 62 170 330 
458 191 427 456 156 
458 346 474 257 77 
422 164 175 62 402 313 
179 106 306 257 456 272 375 
132 179 22 273 36 
92 191 271 367 68 475 257 370 164 109 
458 4 104 265 259 
63 273 473 309 319 309 334 231 129 
458 175 129 458 202 160 257 263 324 150 
458 129 92 191 271 123 
458 204 92 346 271 130 257 277 11 127 198 309 244 173 
265 462 340 268 309 59 
132 92 22 271 452 253 
269 346 189 426 334 
458 191 335 62 452 481 
455 483 458 462 291 
257 470 169 250 271 367 68 268 257 91 
46 351 104 134 86 205 
455 104 340 483 268 269 
458 431 340 293 257 466 
455 104 188 205 458 129 
390 129 271 270 191 491 
257 341 131 134 142 68 189 257 222 
275 131 340 311 254 
257 159 22 322 442 156 
309 127 453 234 62 40 265 346 50 
46 86 269 346 134 257 378 
76 250 271 367 68 
269 191 62 357 441 234 184 
63 351 22 340 67 357 
159 22 251 309 127 322 376 
257 126 107 293 462 354 
455 104 340 86 265 455 202 47 
257 433 86 269 
444 208 346 470 169 250 271 68 
277 10 462 
455 483 269 346 469 
132 242 497 59 
231 79 173 309 55 
92 151 275 455 497 340 104 242 217 265 455 296 453 309 47 309 104 374 217 
63 104 134 104 265 234 205 
275 151 453 309 59 458 73 381 
38 265 346 474 309 244 33 
390 129 271 270 191 163 
79 234 28 458 129 455 104 340 362 309 282 9 265 
265 346 227 458 473 309 104 115 447 
455 131 340 349 394 29 130 
455 106 152 203 265 325 324 
269 497 127 62 470 494 
242 462 426 338 41 
257 169 353 309 68 189 257 91 
257 357 118 462 265 246 292 47 404 234 269 309 55 
132 269 191 340 351 62 450 203 257 387 
455 250 269 324 458 131 458 129 
132 265 191 134 199 179 473 
132 269 497 127 41 442 
455 483 455 358 127 485 309 269 
265 346 227 455 47 309 177 
132 458 131 134 408 28 
92 191 271 367 68 475 31 
62 425 285 353 68 
132 92 462 340 270 
455 104 340 362 309 127 257 297 270 
63 432 264 309 104 62 259 38 257 259 462 309 305 
216 390 497 134 127 142 180 234 332 28 
455 131 340 362 309 244 62 429 
179 22 256 445 56 215 
62 35 462 251 242 217 
132 257 327 151 460 92 
265 191 257 392 63 497 104 
132 92 462 423 
269 346 62 429 309 218 309 496 114 
179 151 251 309 315 62 101 336 13 27 415 257 466 318 309 205 
265 191 62 117 258 
257 195 129 179 202 134 160 257 263 
455 473 309 305 405 
255 131 134 142 68 189 257 59 
347 179 362 257 181 63 358 47 257 181 
63 293 309 86 291 300 
455 4 273 319 197 
257 21 495 367 68 
92 191 271 299 68 475 257 470 169 
257 326 90 353 309 177 332 
458 346 107 234 286 
269 191 134 99 347 458 202 160 
269 346 351 24 210 
92 22 271 29 375 192 
352 133 36 257 25 
185 12 120 436 415 173 
57 271 299 263 175 152 226 
257 425 364 306 265 424 321 
257 277 131 134 68 458 129 
257 241 250 271 367 68 
38 458 175 428 465 
63 358 47 62 446 260 411 234 173 
458 129 257 157 191 460 220 189 269 
201 443 11 127 446 458 129 
46 122 134 24 199 63 104 458 129 
458 131 134 153 493 329 
269 346 332 107 309 173 351 309 305 62 260 
179 202 134 408 28 
458 346 351 438 27 330 
271 455 104 340 483 265 346 257 443 
63 202 273 47 306 
241 131 340 82 
265 373 127 174 392 369 
203 422 257 164 109 353 367 68 189 257 91 
257 456 150 250 351 383 16 
415 62 323 258 265 462 
84 455 11 273 349 233 32 
257 297 413 191 402 
257 91 175 134 152 316 398 
179 131 134 65 
231 462 249 234 257 456 33 
455 47 383 332 492 
458 11 65 234 257 334 443 
179 22 351 50 
179 351 131 340 408 173 62 429
[truncated: 216,034 more chars]
