# Supplementary material
Source: ML conference proceedings conference paper supplement (https://proceedings.mlr.press/v37/steinhardta15.html)
Supplement: Supplementary file 2 [file steinhardta15-supp.zip › packaged-code/data/word-level/plain.txt]

i 've always wanted to do it
in the third game i did n't do good
but we 've found a good team of players
there are no plans he said
i wanted to play here for a long time
this year they did
you were strong and you believed
an american was among those killed
she said details will be announced next week
we did the right thing he said
he gave no details
she is also a member of parliament
but she does n't know that yet
they have to press more
we do n't need a second round
they asked me if they were free
he would not comment on the case
the french foreign ministry said it had no information
he did n't name the european states
he said a decision may not be announced until late next week
he 's the right man for the job
they know their president he told reporters
if i do that i can win
he said at a news conference
there wo n't be an election day
he later was released
he does n't really want to give us a state
we have no life he said
three other men have also been arrested
the company has yet to comment on the report
it was a great show
we have the power he added
i 'm going to play he said
whether he was one or not i do n't know
she 's just like that
this is a big issue clinton said
you 've got to deal with these things
no statement was expected until friday
i hope this wo n't be the case
it also found that
you will end up like us
you may not get another chance
we do n't need to take this to court
we believe all that 's possible he said
it 's been a while
the investigation is still going on the official said
so i could n't do that
she died 10 days later
the military denied the report
it 's a long process
there is no need for it
i would never give up fighting she said
we all go through this thing
this has been going on a long time he said
they have that right
the time has come to lead
we have to make a deal
for a while he was right
we wo n't take that chance he told a news conference
and there are plans for more
the others i ca n't help
election results are expected monday
you 'll get it back
both children were shot in the head
the security ministry has declined to comment
there was no capital
as long as you do n't think about it it does n't come into play
still it was close
that 's another issue
the three men were arrested last month
they did not give details
it will be the people
this is my decision
do could not be reached for comment
i 'm going to see it to the end he said
it may never change
and we 've got to stop that
the other countries are south korea japan and russia
the united states has denied the charges
but it was a good day
this was a big one
this was another one
i 'm in a fight with you
a decision was not expected before next year
the companies include
he did not make any comment
i have no military power he told the associated press
they 've won three
he also said he did n't want to put his children through his trial
we 're going to see this through
that 's very important
it 's a victory of all the team
i thought i had him
who would have thought that
it wo n't last but that 's never been a goal
we will do our best
those two did n't work out
and we should help them
two others were killed
so she gave me my name
she was not released
you have to do a lot of things she said
other top officials also declined comment
those are for me she said
they want no part of the peace process
we still deal with that
and there will not be another
their talks were scheduled monday
but the most important thing is to get the win
the spokesman declined to give further details
it would be up to her he said
it 's great to be back here she said
but it ca n't be denied
i put him up there
six british soldiers are killed
we will stop this war
they should n't have been made
we are a team here
the defense ministry had no immediate comment
we should n't do that
we have to work it out
and that 's just on the court
there will be some problems he said
elections are good
i did n't want to come he said
i just want to see him do time
so we 're going to do it
both are members of the ruling party
it will take a while to start over he told reporters
if it 's new york it 's new york
i said i do n't believe you
the trial is expected to end next week
the agency refused to comment
but she said she will not move house
the report did n't say who got the job
china 's foreign ministry also had no immediate comment
i just want to get home
now it is the same
both soldiers were hit
i do n't have a record
it was the committee 's first meeting
they take up all my time
i was n't good he said
i would never comment on things like that
he did n't make it on sunday
he refused to give any other information
it has no money he said
the leaders have a lot of money
the government still has much work to do
it has not been found
but that 's the way it should be
who could believe this
we know what he did to our country
i think it has to be the best day of my life she said
i do n't really like that
hospital officials had no immediate comment
official results are not expected before the end of the week
china is a great power
i really hope that was not the case he said
so you do n't have to say it
it 's good to get all of them
they are just like us
that is most important
it could be any number of things
we think we can do it
you did n't help our children
i still had a long way to go
the public has a right to know he said
we 've got to fight down to the last point
he added we want that situation to end
as for me i wo n't know until i get more details
until this year that is
and you ca n't do it over
that might be the best way to go play
this is the best way
it 's been that close
they all do the same thing
the government would release no further information
those days may be over
and this is the only place i can do it
it was their first meeting
so it 's just a great thing
it did n't give details
we believe they 've taken it now he said
i do not want to even think about that he said
do you think it must be
he is also expected to be confirmed
i could n't get into the match
they say it 's just another job
you have to make it work he said
i fell into things
that case is now under appeal
i 'm not going he said
she did not call police
but there are a lot of details that go into it
they could n't get there
i thought we would win
final results were expected in about a week
i 'm not saying i should have won the first set
there was no immediate comment from the rebels on the attacks
we can make a good team
the army said one palestinian was killed
she did n't comment on the price
they were very strong women she said
share prices also declined
i ca n't believe i said that
we can do it he said
and i think he wants to be here
but he has not been charged
they 'll be killed
his party now says the elections should be held again
if i win i just might change my name she said
police gave no other details about the case
no such deal was reached
the israeli army refused to comment
the police declined to comment
that wo n't be the case
we want to keep it going
a vote is expected friday
their plans are not known
but it 'll get there
are we going to go back
another round of talks is scheduled for next month
there is no place i can not go
and we do n't think that 's the way the game should be played
there is no place like home however
it will become a party like all the others
but it 's not over yet
now we have to think of the future
this has been a great year
the final is on monday
the second area is new political economy
after all it is their support
some even asked for help
but it 's the same face
i will be no different
i just could n't stop
this man has been through a lot
he had an open court
i told him they really did
they think it 's nothing
point given has made his point
we must try and try again he told a news conference
he wanted to know what i thought
it just has to stop
they were not released in open court
police did not have further details
we can vote them out of office
i never had to work on that
she 's never going to be the same
however the visit was not without opposition
government officials declined to comment on the report
i know the league now
but we 'll take this trade any day
i believe that i can win it he said
but if such a call is made parliament would vote on the issue wednesday
it was n't immediately known whether they had been released
he is not expected to start
he too could face federal charges
he did not give any more details
it is their own decision
we just need some help
it was the only one i had
i did n't need that
but that will take some time
only it is n't for her
that was different
and he did n't back in
the market was closed wednesday
there was no information about the condition of those injured
more details are expected next week
she has been released
a third believed her
they found it here
they are problems of people
and did you do that
the director did not name any of the officials in his statement
that was his best chance to win on his own
his trial is scheduled to start in may
if there 's a deal to be made we 'll make it
then it 's time for work
he used to work with one of them
they would not comment further
there could have been four
she has n't played since the u.s. open
it 's not going to be the same without you
he however declined to name the state
he also did n't say who would be on the team
she would n't give any other details
it 's not financial
but he said he was not the only one to do so
i just have to get it out
she did n't believe it
the vote is expected to take place next week
that 's no problem he said
are you going to put that out
i can say that no one died he told the associated press
company officials could not immediately be reached
but it came with a price
it 's the start of a process
and that was their own players
the rebels said seven people were injured
he 's not going to change
i know what i want she said
he would then be the best man
there were no people
it 's going to be years
but one thing is clear
i hope this will not be used against the peace process he told reporters
washington has refused to do this
he has been arrested
but do n't believe it
but he declined to give any other details
officials could not be reached late tuesday for comment
north korea is not a member
police could not be reached for comment
now there is a president
but she did not name him
it 's time to come back she said
they are trying to win
the past is past he said
i do n't have a lot of hope right now he said
that gave him the lead for good
american officials said they had no information about the reports
if they do n't call i have no future
but we wanted to win the game
other states have similar plans
it 's a long long process
a government spokesman could not immediately be reached for comment
the money does n't go to the players
palestinian officials denied the report
they 've been through all those things
i do n't like to come off
company officials could n't be reached
it was a great day for me
i had to go for the shot
and that 's not going to change for a long time
she refused to do that
we want a different world
i 've been hit before but this was different
they released no further information
there has n't been much use for them
clinton also would
china had no immediate comment wednesday
we have not given up the statement said
now it is high time to take action
it is time we get even he said
or you can play the players
hospital officials declined to comment
but it 's going to take many months before it can be used
we 're trying to win games
no one has been injured in the attacks
you do n't want to know he said
there was no immediate report on the talks
he has not led any of them
the next report is scheduled to be released wednesday
it has always been open
it was released tuesday
if you do n't think you can win there 's no point he said
we have to take the shot when we have it
she said in a statement
he 's right up there
we have to go play
but i think he was
he has not been charged in the united states
it 's a good start for us
it 's business now
money ca n't be denied
he said more details would be released next week
you would never be seen again
that 's market forces
i just did n't need to do it
it 's not like we need a new place
it 's the best thing for him
the two have n't been charged
but he said he is not going to fire the minister
but workers did n't want to give up the system
they did n't give us details
official results were not expected until later this week
but that might change before long
they came to fight
i do n't know what the problem is
in russia most people do
he also played for the french national team
you ca n't clear the city
his condition was n't known
i just made a decision
bank officials could n't be reached for comment
i know i have a long way to go
he is expected to appeal
the first results are expected next week
it gave few other details of the meeting
authorities say there is nothing they can do
but he denied any decision has been made
still now might not be the time
they asked for his immediate release
you could not do more for the city
if you need help they help
i had to get used to those things
the government would n't immediately comment on the report
here are details about them
the official did not release any other details
he could not be reached for comment after the meeting
that wo n't be the case this week
it did n't work here
but i 'm going to get past it
today was a good day he said
she said she could n't comment further
the military denied this
but this meeting was different
we do n't know who did it
he said he did n't know there was a need
we were just late he said
she was released thursday
it 's just a job he said
or declined to give further details
we have taken on a national problem
all four were shot in the head
that was rejected wednesday
they do n't want that here
it 's been a long run she said
if you have children you know
this is an important time
i do n't see it he said
other games were scheduled for sunday
but it is a race against time
however talks continue over many of the details
that was up and out
we have to keep them out of the parliament
it 'll be good because it 'll be one country
it 's also the best
i believe the man can do it
that 's the case here
police declined to comment to the associated press
this will be the last fight he said
i hope to be on the next one
no attacks were reported
it would not be right
he said more details would be released later in the week
the foreign ministry also refused comment
it would be their last lead of the game
that man has not been charged in the case
that was part of the plan
i have a lot of plans he said
he does n't really know
he is expected to appeal the decision
i 'm in my country
we were too close to one another
palestinian officials immediately denied the report
he 's not american
he lost his life there
that 's for you to judge
you could n't make it up
we just have to continue to play our same game
it 's a big win for me today
we 've not said we do n't believe this should never take place
we just want to continue it
no details were given
we think we can make it
this can not continue he said
come and do business
he could not be reached for comment saturday
but that 's the past
he also was meeting with government officials
we do n't have help
there is nothing for us with this government
those are the most important things
and some still want to go back
final results are not expected until sunday
many people believe he has died
he said they should be
the others gave up
but it should be a good match
i want my children to go to france she said
but he does not want peace at any price
the four were expected to be released later tuesday
no decision was made thursday
it was his first major league start
but i will get a hit
the problem is money
they made no public comment
the soldiers were killed thursday
but it has never made the final
but i have to make this move
we should think of the future
there were no immediate reports of children being injured
and he said get out
it has after all been seven months
too much was made of it
he wants to be here
an appeal is expected on the ruling
i think we could have won that race
the election is scheduled for next monday
that 's the second one
that 's a long time
so that ca n't be the only thing we do
for us they still are strong
all three finished on the same time
it was a war he said
the army declined to comment on the report
no vote is expected until next week
both can appeal sunday 's decision
he was never so right
this should be their day
no violence was immediately reported
that 's not always possible
i had a great games
that 's the good news
they both want to see the children
a u.s. state department spokesman declined to comment on the report
so it 's always going to be that way
it 's a system we 're played all year and it 's a system we believe in
you must know what is going on
they have a great team he said
she refused to give more details
i never have and i never will
he had a great game
and he would n't give his name
most analysts give her little chance
we 've got to do it this year
we do n't have any more money
u.s. military officials also had no immediate comment
they said they would appeal
now it is up to the people of the north to show that they can do the same
that 's a big problem he said
a final decision is expected next year
but i 'm not an official
details were never released
all three have five points
that 's what this is
the talks also include russia japan and south korea
it 's been a year he said
court officials declined to comment further on the case
the time has run out he said
it 's all the other things that go with it
it 's like you want to get up but you ca n't
the president was on time
we 're set up for a really good year
they have a lot of very good players
we 're not going to see it he said
it was not given to me
results could take months
it said details will be released later
it is expected to last all week
he is expected to be able to play again in two months
they face each other in court later this year
it 's going to help me he said
it 's good to see you again
he said however that he expected an agreement to be reached after the election
they 've lost the past seven games he did n't start
the party denied the charges
and i want my money
he might just get that chance
he declined to give details of the talks
i believe this is important
the foreign ministry had no comment on the report
it 's been a great week he said
he had no other information
you 're not going to run him down
we still have a long way to go
we wanted to win the last game and we did
he declined to name the companies
i was trying to get third
but we have to try
they had four children
we do n't have any more details
then there 's iraq
if you do n't call it you do n't have a chance
the ministry said it wants to
no i do n't think it does
you just need to do it
but we can not do it
the game was called off
several were children
it is their country
many people already have seen it
i can just go and play
the military said seven people were killed
it also said it would have no further comment
he plans a news conference on friday
other charges are expected
we 'll never give up
i do n't think it will be a long time he said
it 's a new thing for me
i do not need information
we want no more war
no fighting was reported tuesday
no one was injured in the attack late saturday
that 's the situation
this time was no different
it should be a great race
but is it out of control
time has not run out
that may now change
he died three months later
there is no name for this
and that 's not very good
that process is expected to be finished next year
she also was seeking her first world cup victory
the attack was not reported until wednesday
you already win when you do that
but i would n't be able to control it
this is the first time that such a meeting has been open to them
there 's some good news
what has become of it
that was until saturday
i 'll need his help
he still had another chance
i really have to think what 's the best thing for me
he wanted to help them
i was the injured party
she gave no further immediate details
she said he plans to appeal
that is up to him and his children
it was the first meeting of the two
this is the new face of my life he said
the report gave no details of the ruling
still he could n't play with it
i had to make a decision
then he added it is a police state
i did n't have any information
it 's a big government
it would help he said
he did n't have to
bush said he held that same hope
but they still lost for the second time in three games
i think there 's hope
it is part of the process
there are so many other children
they had been scheduled for release on wednesday
and that 's not a good thing
it 's not very clear to me he says
others go even further
the election is sunday
no president 's visit is going to change that
i did n't want more
people would have told me
however he is expected to try again next year
do not release to the press
this is the situation now he said
two party members died according to the group 's spokesman
we did not give them a chance to get into the game
we 've got to make the most of it he said
it 's a new company he said
there was no comment from the south
we want to stop it
it was a great match he said
we did n't plan to make a big deal of it he said
he did what was right
they are the three forces that make the world go round he said
i hope it 's the case
the government killed him
this was a great time for all of us
the defense asked for no time
she had her chance on thursday
i believe that it 's the best deal we can do
we 've been through that
they are not allowed to return home
he denied all the charges against him
a news conference was being scheduled for next week
three others still face trial
you all have to go
a foreign ministry spokesman declined comment
but he was too late
one was from japan
the conference began tuesday
you have n't got a chance
we have n't lost she said
it could have been really close
things just did n't go our way
the man was n't injured
other games are on
but is n't it the right thing to do
an investigation is under way
we do n't have to be white
it was the coach 's decision
she had no details
the house bill is the same
it 's been a year since i last won
the country has been in the world group for three years
this is the best he said
i also want my family to be left out of this she said
she won the american cup two years ago
i did n't have control he said
she talks about me
he refused to comment on the ruling
he 'll see action tuesday
the foreign ministry declined to comment on the reports
i think it 's possible
he did n't stop there
it had no further comment
she refused to be quoted by name
i believe they are
i think he 's going to get a job
i could n't move at all
that should not be up to us
we can all do more
but it may not work that way
police said no charges were planned
they lost earlier to south korea
the u.s. military did not comment immediately
but that 's not always the case
it was really a long shot
she wants to take on the world
the army spokesman had no immediate comment thursday
the results were released after the market closed tuesday
some still see hope
so he refused to play
the statement did not name the company
police did not release details
i 've got to play a good match
and we 're going to try to make another run this year
we ca n't control that
i 've been able to work out
and they 're very good
it could also be his last
this is just a game
and they might have to do it for two more days
the injured were taken to a city hospital
but the major problems are still there
the government campaign is to open next week
and i hope it wo n't be the case
we have a long way to go
you will be part of the game
israel 's foreign ministry declined comment
the government asked the troops for help
we are trying to do our best he said
it 's going to be a great show
it has said it will take more
another meeting was set for thursday
six people died that day
he called for early elections
police reported no further details
you had a chance to fight
i do n't want to stop here
the military said soldiers did not open fire in the area
he said he would not appeal
we 're going to be all right
a state department official said monday that the conference will go on
i think about them
i think that 's the way you 've got to be
go get it if you do n't have one
that 's a big play i 've got to make
police denied this
that is fighting for people
the two could not be reached for comment
you have to take those
another meeting was set for next week
she did a great job
they know we have the power
both were taken to a hospital
i call them american
they have their own force
are you for working people
we are going there
that 's the way he wanted it
there 's nothing you can do she said
it does n't work out that way
there 's no issue of fighting
i want to do it she said
it does n't work like that
it 's too early to say
nothing is final with them
but it 's part of the game and you have to deal with it
i do n't know the name of the man who killed him
if they wanted to do that they would have arrested them long ago
still others have closed down
i had to move her first
it just does n't work like that
i know i have a chance
they will be tried later this month
a vote could come later saturday
nothing you can do about it
it was not clear when they died
it 's been one thing after another
i said i do n't even know what that was
he went for his head
that 's really just the way he is
israel would not immediately comment on that report
he died only a few years ago
he 's got a big game
an agreement must be found
he also refused to give further details
the u.s. military denied it
no action has been taken on it
three men have been arrested
he declined to comment further on the issue
and may the world come and help us
i did n't get a chance to get that shot
there 's a good chance of that he said
no problems were reported monday
however it did not give any details
this is going to take a while he said
the man was among the five people injured
he said it did not
they want to set us up he said
but he still won the match
results were expected friday
both men were killed
he refused to name the companies
the first one began last thursday
i do n't think we are going to do that
he was shot in the back
the most important thing is to win there
there 's been a major change
it 's like this he said
it was their second meeting this month
he said the government would appeal
and there 's no one who can help you out
we 're one big family
it will also be his last
washington has refused
later the rebels also called off peace talks with the government
things will change next year
i thought this was going to be our year he said
north korea wants talks with just the united states
then there will be an election he added
nothing should stop you
we have very good players
if it is news it has to be reported he said
many others have not announced their plans
they are still free
but there are those who do
they declined to give further information
but i do n't see it being a problem
two u.s. soldiers also were injured
he said that any change in any country should come from the people of that country
this is not new he said
he said the two will be released
officials could not immediately be reached for details
before that he was great
two soldiers were injured
no other details were released
you are a great army
the group planned to meet again friday
they scored at will
he has n't told us
but he said he took her back to the hospital
she might have died
then they were released
the issue is closed
there have always been
i want to start it over again
china 's foreign ministry had no immediate comment
we ca n't force a peace
he does n't have to win
all three can appeal the charges
he declined further comment
who would get them
he is likely to be released after 10 years
the official gave no further details
you can do that here
but it 's the best
he was n't going out like this
we want to get the match on
that 's not the way it 's going to be
so there is a long way to go
the trial is expected to last two days
it has not been found he said
we have a lot of different weapons
that ca n't be he says
we never see any money
we do n't like them
today we ca n't do that
the court refused to comment
this is a record for the past few years he said
the north has denied the charges
you have to take part
you did n't go away
u.s. officials have refused to comment
i want to be the best in the world
this was n't part of the plan
i wo n't back down from that
there are a lot of great players
he can get back into the match
he said in washington
he was very important to her
the united states has never won the world cup
it 's always been great
the companies however denied the report
then she left us there
i do n't think it does
it is not possible
no final decision has yet been made
then his money began to run out early this season
that process could take months
we can work with that
the company declined to comment monday
it was not clear whether israel was scheduled to play there
he is expected to return next season
but it was a close call
it will be closed to reporters
that 's what they want
i believe we are going to get that agreement he said
i really want to know
that is what i really believe
we 've got to try to get the next one
the vote is scheduled for the end of the month
he declined to give further details about monday 's meeting
there are people that would like to have this job
the opposition also has had other problems
we are against that
their trial is expected later this year
i 've always been like that
they should have made that decision
it did not name the countries
now you ca n't have an off day
two days ago i did n't think we could win the world cup but now i do
they told me that i could not fight again he said
i did n't think about the past
i never thought that this would be a problem now she said
that was our first goal
the game is over bush said last week
now people know the name
the official 's name was not given
they do n't want him to fight me
it was a really good day
you attack and you hit him
the report is expected to be made public tuesday
the government has not yet released official results
this could be the case
i 'm really not in it with you
his face was different
i like the big games
things are under control
they still need time
until then they will allowed to keep their weapons
if i do n't get it it 's not the end of the world he said
i hope we 'll win here
that 's a home run
we had a great year
the problem did n't become public until this year
that was six months ago
i do n't want to give it any thought
since the new year prices have shot up
talks are scheduled to last until thursday
he has six games left
i 'll give them all the information they want
we are part of the american economy
but tuesday will be different
we would make it again
police planned no further action
we 're not going to give up
north korea has denied it
he said the troops had already left
this is a major issue
friday is scheduled to be the last day of talks
the group could not be reached for comment
authorities have denied the charges
he did not go to the office
if we are strong they will go he said
people have called me
we will go to court he said
a vote could come later this week
they did n't believe us
we have to play them in the united states
four people were arrested
and for a week they do
i 'll just keep trying
we can do things that are different than what we have
i really thought i could he said
the police refused to comment on the call
the israeli military had no immediate comment about the attacks
he then took the next two games to force a third set
it will be the second such meeting
he declined to give more details
i did the right thing in iraq he said
the president has refused to do that
it was not known whether they would be charged
and that 's just the point
but he wants to go home first
there was no immediate army comment
many went before him
results are expected later this week
they have a very strong team
the company reported its results after the market close
and he wants to meet you now
wednesday they were allowed to return
the first goal came when few people expected it
two other men were released friday
they had two children
i do n't think we can continue to control another people he said
he does n't want me
it was his last big victory
i think it just was n't thought through
i played my game he said
i do not want to believe them
there were no immediate further details
but it might still take a while
but they were used to it
here are their reports
it was a political ruling
they all get to vote
he is scheduled to return to new york on thursday
i thought i could do some great things
he 's not going to do that to me
but he was a great man
that 's not our goal she said
i could n't really believe it
a japanese government spokesman denied the report however
results were n't expected until monday
this is not the major problem in american life
we have no such thing
it 's not the government 's money
that issue could come up at thursday 's meeting
home is home he said
but those reports have been rejected by officials
it 's been too long
final results were expected early friday
they 're not given to you
change is a good thing he said
three israeli women were killed
no one was injured in the attacks
what 's another year
he was the first to go on trial
do n't stop fighting
i think about it the american said
security forces killed him a year later
but i still want to win
they will take the shot again
a year ago i did n't think it was
he was part of my family
the move was expected
those charges could not immediately be confirmed
he 's a good team leader
a meeting was expected next week
u.s. officials did not immediately comment on the attack
we just have to hope for the best he said
i do n't know what was going on
that is all they want to do
but he did have help
france went on to take third place
they have to change that
our game does not want them
it may be his last shot
that 's the way we play the game
the government refused
it was n't the end of the world
five city council members
but right now i do n't even want to think about it
they could not be reached for comment
results were expected early next week
i like the players
i just want to take my time
most of us are not official workers she said
this can not go on this way he said
it 's most important for me
the military said 10 people died
that 's what we did
money is another problem
but it was a great day
it 's a business she said
i did n't believe it
with me i have all this
but the high court has not led
we are closed today
i really did n't see it
he is expected to be tried before a military court
i do n't think it will be the case this time
they did n't want to be out in that other life
but they can play some good defense
which is just the way he would have wanted to go
no other details of the deal have been released
i think she 's great
he 's one of the members
you can still use them he said
we had to do that he said
this was a very good match for them
they 're working on that
again he did n't give a number
but there were n't
i just wanted to win
i will have to see
now he is going to get away with it
it took a long time he says
do n't believe in them
other states are scheduled to be released later this month
i did n't really have a chance to hit on the court
there is a new government
my family wants me to come home
the investigation is still going on he said
but if he wanted me to be there i would be there
the final results are expected before the end of the year
results were not expected before monday
if it does n't it does n't
two government soldiers were also injured
it 's already too late for that
the long program is on thursday
the members are always the last to know
we 're trying to be different
she said at one point
but i do n't think it will be this one
but we wo n't stop
we did n't know what it hit
she was third after the first run
that 's going to come and go with his game
she did n't give any details of the talks
he said they were reported to be in good condition
but it will be too late by then
but he did n't in this case
others try to make it on their own
only they were n't for her
the team gave no financial details
but there 's a price
i said it is my place of work
no new talks were scheduled
the trial is expected to last a week
i could n't stop them
i 'm not going to vote
it did n't give any more details
it 's going to go on for a long time he said
who will control the state house
so this is not a war situation
he should have been
that 's the last thing i would do it 's the last thing he would do
the north called off a similar meeting last week
it did n't give financial details of the agreement
they do n't do us in
he never lost a set
had a great meeting he told reporters
they declined to name the company
the trial was expected to continue thursday
the problem is an international one she said
we ca n't win them all but we are trying
that 's on the record
that 's all we 're going to say
but nothing will take their place
that 's the thing about this world
the agency gave no details of the talks
some people think it 's good
it did not give details about other people injured
i 've always believed that
i 've come over here with nothing
now he must do it again
three percent said they did n't know
washington has refused to do that
a u.n. official said
our record is not too good
they had no other information
at last we got them he said
that 's the last thing they want
this visit is very important he said
you really do n't know
we 've got to get out of that
no trade agreement will come out of the talks being held this week she said
you have to do the same thing but it 's not my game
if they stop one part of our game we go to the other
that 's no way to run a business
if you get them that 's good
we still have a long way to go he said
two soldiers also were killed
they never even came close
that has n't been a problem this week
officials results were not expected until friday
he just does n't do that
it was a major problem
he does n't want to move
they were later arrested by police
we want the peace process to work
i have hope he said
and i was able to do that
that 's the only thing we can do right now
it is n't over yet
i really want to win it
i think we should do the same when they open a bank
it 's an important race
he played really great
this is people power
a deal is expected to be announced this week
you have to work for it
they did not return a call for comment on monday
he just might get another chance
others have given up
he had four points
the israeli army did not immediately comment on the u.n. statement
he thought of american military might
that 's their job they 've got their right to do that
this is not a palestinian area
police declined to give her name
we will fight again
he did not name the groups
but we did a great job
he has been released from a hospital
he played very good
it 's no different than any other case
u.s. officials said friday
he said he plans to appeal
many have not been seen by the public before
security council officials also could not immediately be reached
that 's the first thing they have to do
they do n't stop you
i just wanted to do it the right way
most are believed to have been released
he was arrested a few days later
it 's a right we should have
no election has been scheduled
a spokesman declined comment
the first is scheduled monday
they will not get that he said
we 'll do our best
there will be a day
we finished top of the group
i do n't believe it she said
it 's not the last game of the season
show business is out
we have been through the fire before
it 's important for me
major made no other public comment saturday
the goal is the world cup he added
the other was released wednesday
u.n. officials could not be immediately reached for comment
we 're really going for it in the japanese market he said
but he said business has been good
if you had to play it again i would have won
it 's come down to that
the party denied it
i believe that 's the right decision
i 'm not as good as i was five years ago
he died 10 years ago
the white house also had no immediate comment
he said others might also be closed
i know i was n't there he said
he declined to give financial details of the deal
israel also is not a member
the violence did n't stop
in each he is meeting national leaders
i 'll just have to change plans
then he was released
the authorities said four people were injured
we have our law system
it should n't be but it just is
they 're not in the way
these people are going on
she was too good for me
the government refused to comment on monday 's court action
the show is not open to the public
she was taken to the hospital
we still think we have a good chance of going on
wednesday was his last day
now they have nothing
he tried to stop her
you ca n't win all the time
this is all i 've wanted to do for a long time
six men were arrested during the day
we just could n't help them
he could n't do it
i did n't play my best she said
he was released without a trial
he was a great man
it was one of my best games
police officials refused to comment
the government has rejected this
it would be up to the eu
we do n't know what our situation is
he was not scheduled to meet palestinian leaders
i will not run again
there has to be another way
they have no information about him he said
i do n't want to think about it
she lost in the first round last year
if he is he has a right to be
there are no foreign troops here he said
they may have a point
three people have been arrested
no american soldiers were reported injured
i know her game she said
another meeting was expected monday
but i have n't seen her
the people have won
it should do the same for these workers
there have been no attacks
now it 's a strong country
he can do a lot of things
that is the best i can do
we need to keep trying
i was going for the win
there was no immediate comment from his office
it has taken a lot of work
we must have more women
i did n't take my time
it can be different
the military said it had no further details
i do n't think we should have this at the games
that could take some time
the judge declined
there were no immediate reports of fighting
i had to get into it
but hope is not lost
i hope this is a show they really want to see
there was no comment from u.s. officials
asked whether it was time to move on he said
we had to think it over
he said he could not give details
that second life has been good
the reports could not immediately be confirmed saturday
the bush campaign confirmed that
bush has refused to do so
but will they do it
we had to take our chance
all are believed to have been lost
they said they just want to clear his name
he had a good chance
there was no comment from palestinian officials
i just left them she said
but i do all the things you do
now it 's time for some more european action
i think we are going to have a deal
army officials could not be reached for comment
who would 've thought
i 'm trying to be the best
i did n't do it today
it 's what you see
now it 's been four games
he was released from the hospital last week
i ca n't think about it now
you 've got to deal with that
she 's not the one
rose left the team after this past season
last year she lost here in the second round
and i think we have that
because i lost my last match against her i did n't want to give her the chance to get into the match
i think i would he added
but we can do more
we 're going to continue
this is what they expected
the talks were expected to last through the week
they did n't get a chance
but that 's the future
that 's all the money we had left
there were 10 last season
this is the only one he said
i 'm going to give him a start one of these days
they had found each other
i know who you are
few details of the new deal were released
security was an issue for both
no other make has won a race this year
the hospital had no other information
i think she did a great job
the second round is now scheduled for saturday
i do n't work out he said
officials there could not be immediately reached
i 'm not going to give up a chance to play in a game like this
the police told me to get out
the military denied it
but we do n't have it right now
that was denied by the government
you have to put up with it
we get what 's left
i have no peace now
it is a big country
the government has denied the opposition charges
the injured were taken to hospital
both have been released
it was the first reported meeting between the two
three people were killed and six were injured
the israeli military said it had no information about the case
that 's not our goal right now
no other soldiers have been charged yet in the case
the city planned to appeal
the federal office refused to comment
they closed down the local market at one point
five soldiers were injured in the attack
it will never change
i think he thought i was the other way
a decision is expected to take several months
this fighting may be long he said
there is no program
government officials could n't immediately be reached for comment
public opposition is also strong
she has denied the charges
i want to do it all
israel 's defense ministry declined comment friday
we ca n't do without that he said
there was no immediate comment from the french on the agreement
i think it 's going to take time he said
he can win the time trial
it 's all different
there 's no chance for it to change he added
both said they were not
a vote is expected later this month
that case is expected to come to trial in about a year
now is the time to change all this
he was the political leader
the peace process has many problems
i do n't think we should vote on this one year at a time
the process is likely to take several months
little is known about the group
city officials agreed
u.s. officials do n't want it to come to that
it may be a long shot
this is my team now and this is my city
she could n't get away from her job
there is no problem between them
but she did n't believe it
it was released monday
he would never take a chance
he had no further details of the case
i never went after them
i do n't think they have to be told he said
i want to fight and i want to win
it 's been a while since i won he said
you just keep on going
i just want to go home she said
that has n't been an issue this year
and they still have not won here
i thought it was good she said
it 's not going to stop me he said
a second vote is scheduled friday
company officials could not immediately be reached for comment monday
he did not name the minister
we could n't do it
police refused to release his name
he does not give his name
this year it 's defense
he declined to comment on the situation
it 's not going to change my life
we need this market
they had expected to go home
but that 's just part of her appeal
a company spokesman declined further comment
i think it really did n't
we went for the win
we can make a plan
we do n't want violence
we ca n't stop them
an agreement was later reached
we have got to work on that
he could n't immediately be reached for comment
and that 's what we did
she was taken to a local hospital
he would not give his last name
the hospital did not immediately comment
the report gave no details of the agreement
but he did n't need it
he had no further immediate details
they are a power now he said
the final is monday
the two men planned to meet next week
they killed my men
that was a great shot she said
official talks were scheduled for thursday
he got away from me
the government did not comment on the attack
we 're in the same situation
the work we need to continue to do is very clear he said
it 's what he wanted
i never thought it would come to this she said
some were arrested
they would appeal to the high court
it 's their country
it is not the start we wanted
the army spokesman would not comment
people are going to see us here for a long time to come he said
you have the money
but it 's not the same now
this is the way we 're going to play
then he 'll make his decision
there would be another one
he refused to give any other details
the ministry statement gave no further details
the is not yet lost he said
this is very clear
she did n't name the opposition
this was their final appeal
i 'm not going to get into that
he 's got the money
the games have been different
that was a week ago
she was not charged
he wo n't be given a chance
he 'll likely be released next week
they could n't stop her
so that 's good news
there was no immediate comment from the security forces
he also did not give details
we just ca n't think like that
you just have to go on
that 's a good thing for his future
the united states was not among them
if he does n't he does n't
court officials refused to comment
but they do n't market it that way
the company could not be reached for comment on saturday
that 's nothing to do with her he said
family members declined comment saturday
they are like family members
the league refused
we are working on it
he 's very important for the french team
he is the one i want for my president
he has to hope it does
the meeting could take place as early as sunday
she has been taken
it is not a good news
we will and i will
i just hope the results are the same
but this is the first time they did n't
they had their chance
you have to move on and do other things to help make up for it
they need our help
i own my own house
he is expected to be there a week
it was the right thing to do
i 'm going to try to help at the house
i wanted to be part of it
but he has refused
we will start immediately
she was n't the only one
we know life has to go on
five people have been arrested
so we can not say who they are
he might get his share
the government denied that
then came the good one
i did n't know that he said
we 'll do that for you
the agency did not give details
you have elections
there was no immediate comment from the government on the report
he does n't always like it
five were released last week
i came in with you and i 'm going out with you
we want people to come he said
you know money talks
a federal judge made the call
market with the eu in second place
a ministry spokesman refused to comment
each nation will get its share of the city he said
it 's time to show that we are people of peace
but there were no reports of violence
the army said the palestinian did not open fire
i want my players to be the same
what are people going to say
it does not work at all
and that 's the way it began
the other was released
and children should do the same
i have won a great deal of money from the market he said
there 's nothing i can do about that
it was just one of those days
we 'll support his appeal
now we 're in the information business
we still have a long way before us he said
we will not make an issue of this
we all know that this is not over
there 's nothing to say
i always think he would play
it is not our job to do that
we will continue the work until we 're told to stop he said
she gave no further details
the company had no other comment
it will take a little while
if i do n't like it i 'll make it up
the ministry had no immediate comment on the reports
you just do n't believe it
they 're not like any other
so i hope i will play
there 's nothing i can do about it he said
i hope he wo n't do that the president told reporters
i did not know we had these problems
but we had to do it
a day later he died
they 've been through it before
i hope to be one of them
now it will all come up again
this year both were big
i believe we made the right decision he said
they did not have any more information
we have to continue
the others died later
we know we ca n't stop it
i just think he 's the man for the job right now
i like to keep it in the family she said
he denied reports that they were shot by rebels
we could not do it again today
it did not give details of other talks
the stock did not trade monday
the defense ministry had no official comment on the report
those things will always be important to me
also under the military system there is no appeal process
but i will come back and try again
he did n't give me no problems
the decision will be announced friday
this is a big number
he has not been seen again
others said the price was too high
it 's the match of the season
he had no comment on details of the case
i just hope i can have my very first win against her
no i do n't believe it
then again it may not
but other economic officials played down the comment
in a situation like this we 're never right
it was just so great
it 's not like today
right now it 's nothing
i used to do things he could n't do i used to run
believe me on this one
police said nothing was found
they have killed our leader
clinton did not make a statement
i want to be of help
the last round of talks was held monday
they need the business
you have to do a number of things
but it 's not the end
she declined to name the countries
that began to change this week
we hope to be like them one day
the company has a long way to go he said
and i want to be there
by sunday it appeared to be too late
we will continue to do our best
he was called back last week to the job
but they did nothing
and i 've had that
i think it will not
official results were expected later
we still have a lot of hope
you can not believe it
this will have to change
i 've just been very close
she has to do it for the second time this year
i do n't think he has a day off
new york is a big city
those are not workers he said
she 's not the only one
i just like to play
i believe he is a great leader of the team
it is n't working now
and it did with one condition
he hit me with a good shot
we want to know our future
three were arrested
you 've got to go for it
police have released few other details
two were shot in the head
he did it in seven days
but i do n't think he 'll do that
he 's fighting a man now
but i do n't support violence
you are the leader of israel
two police also were killed
this is new information for me
there are possible problems
you have to face them
i just wanted to get out of here
for now it 's too early to say
this is a good team without me he said
the election gave us nothing she said
i do n't think about it she said
now they want to stop another
i would like to have won this
now there 's some defense
a vote is expected next month
no one even came close
still he does n't know what 's next
that made me stop and think he said
it was a great two days
now we have to see what is the peace plan
but it was a very important game
there were no reports of other foreign injured
all have been released
a u.n. official had no immediate comment
i did n't know it was in
they never have been
it 's been seven days of this
there is little work
but that is set to change
what is our work now
they want the money
he said the family asked that no other information be released
the department had no immediate comment wednesday
after all it is their money
however his play did
israeli police could not immediately be reached for comment
each man was killed by a shot in the head
it 's more important than that
china 's foreign ministry also said it had no information
the united states lost in the first round
i can say that the situation is under control he said
they have too much military power he said
russia 's foreign minister is also expected to visit
he was arrested earlier this year in the united states
results were expected early thursday
they do n't like it
you get on with it
the decision came after the stock market had closed
police declined to give details
there was no immediate comment from french authorities
they said they plan to appeal
we have to win the next one
i never thought i would be able to say that
details of the plan include
the president has to run his country
the hospital has refused to give any information
she did n't back down then
soldiers shot and killed him
for the good of his people he should
that money will now be lost
that 's been our big goal
and he was right there
are they really in there
the national police agency refused to comment on the report
he said no one asked
the family must be close
no i do n't think so
i tried to help them
i would n't know she said
the defense ministry said it had no information on the situation
now i think there will be war
they were and they did
this is the show 's only stop
there are a lot of problems
the man declined to comment further
that 's the situation now
it 's that time of the year he said
we did n't want to have any of that
that was very clear
a government spokesman denied the charges
a decision could be announced as early as tuesday
that will be a long time to come
i plan on it he said
he has to have that record
they should get used to it
we want to make money he says
military authorities declined to comment on the reports
company officials could not be immediately reached for comment
he denied reports that they had been arrested
the spokesman did not give further details
she said the group would appeal
parliament officials could not immediately be reached to comment on the report
but it will be our agreement
her name was not released
officials did not immediately comment on the violence
there was nothing to do
it will be the first such agreement between the united states and a european country
they have not been allowed to return
but he said the money made him do it
so you do n't know
he is a very good man
will he go for the record
no other games were scheduled for thursday
the trial is expected to close next week
the israeli army did n't immediately comment
this was the right time for a change
but that 's what i thought before
russia has denied this
there was no immediate report of fighting
but things got away from each of them after that
they just do n't know what it is
he also said the price has to be right
there was no comment from the french
leaders come and go
it was a good week for me
it 's a big market
they do n't even play
now it is time for us
it was japan 's first game
then the power went off
the vote is expected to be close
north korea had agreed to the meeting
company officials could not be reached for comment late saturday
i thought there would be a lot of people who agreed with me
i ca n't believe i made it
more than three million people were killed
we only have one goal
but they could not stop the attacks
there is nothing he would not do
the judge made no immediate decision
that 's one of the few things they share
he said that no country should have nuclear weapons
we want only peace
he was very good she said
this is the second time that iraq has made such a call
final details have not been released
he was just a great man she said
i should have won this match
he did n't give us any problems
and the players have to believe that and we have to make them believe it
party officials could not immediately be reached for comment on the report
results were not made public
it will be too late
five rebels were killed
one man was found after a few days
you ca n't change it
you would also have to change the name of the area he said
we know it ca n't be both
this is a war to them
he was released sunday
so we 're going to do it as a team
i believe i 've got one of those
there 's no place to put them
we just have to make the best decision
we do n't want to put him over his head
a government agency said monday
israeli officials said no plans had been made for such a meeting
but the elections are n't for two months
i do n't need to go on
she had no details on their condition
six were released earlier
he would not comment further
an investigation is still under way
he has not been found by police
the trial is in its third week
that 's what i said
you just hope for the best
part one appeared last week
police released no other information
the company could not be immediately reached for comment
seven rebels were also killed
this is the only time it is important
there 's no change
that is not the case the statement said
we hope for the best she added
a few wanted to go
the police did n't fire
they came out strong
no decision has been made
results are expected after two months
i just have to play my game
it could end up being her only one
you will never play that game again
the united nations had been expected to make the report public
we are against any military action he added
we do n't have any of that
it was as strong as possible because there was no other way he said
some even asked for them
not likely he said
a final vote is scheduled for today
there 's nothing you can do about that
but it 's not what i wanted
there was no immediate comment from the opposition
both said no meeting had been scheduled
that should not be a problem
if he can do it you can do it
another 10 people were injured
i think that he will do it
i believe they 'll do the right thing
but i have n't seen any
he has n't died yet
i wanted to get back at him
she then asked them for money
they do n't have to come
we 're not a team that 's going to try a lot of different things
no other details have been reported
we want to see them face to face he said
that did not keep them from trying
it was closed to men
we 've been like family
they now have four
i 'm going to move my head
but the court rejected the appeal
results are expected friday
the report did not name the others
this was n't one of them
he can not run again
they was really going at it
he is still the palestinian leader
it gave no other details about her and said she could not be reached for comment
they have no children
the security council was scheduled to meet again wednesday
it gave no details about the group
i did not win the war
it 's a great place to play
the accused has not yet been arrested
there was no immediate comment on the rebels
we closed the case
i hope it will keep going
it need not be the last
but they have to help us help them
but i take nothing away from him
the british open is as big as they get
for many that is too long
it may be on the economy we will see
there must be another way
it was the first of four
they were off to a good start
no money was found
i just want to vote
a news conference was planned for later in the day
it would include no u.s. troops
he also has a plan
no violence was immediately reported thursday
i would n't have a job
he 's never made it past the second round
he was not expected to return
he was released early saturday
he did not name any of them
he did not name him
that 's the last thing i would do
but last year he won two
it 's no big deal if you think about it
the government statement gave no further details
but i did n't think about it
it is expected to start work next year
that 's going to take some time
he also fell for russian women
our people want peace
court officials could n't immediately be reached for comment
and it 's a really long day
i really should try
she did this on her own
and they should know
some people plan it before they get here he said
he also scheduled talks with union leaders
they were really strong
now we must show it
he said the process might take months
i did n't think i had a chance
i was strong he said
you need to fight for them
he said he had not yet seen it
she called it a local problem
she added that she never expected to win
he 's going to be good
he is expected to take office next week
american international group
clinton did n't stop there
new york does n't have a team
we 're as good as they are
they shot him when he refused
the games end on sunday
i 'm at the end of my life he said
you do n't want them to change
i know i have to do that
i told them that today
no one was injured in that fire
it has yet to release details
but i 'm going to try
he said they were not injured
it was never found
i 'm not a good coach he said at one point
it 's really the final
we will move if the u.s. does the spokesman said
a third man was charged earlier
if you do n't you have nothing to say
police officials said they had no information about the case
it is not like that
but it 's not the first time
that should be big for us
i do n't think i did
officials could not be reached for comment late friday
all that may change
all four have the right to appeal
we wanted to do the right thing he said
we do n't want to fight
the army refused comment
but the two denied the reports
i ca n't think about it she said
you 're going to have to do it
he has a lot of game
this should not be a big issue he said
if they do n't like it they can go home
palestinian officials refused to comment
it was his third world cup win of the season
i know i can be there again
it will always be part of our game plan
the court 's next meeting is sunday
i did n't want to be out in the open
they said they did not
i hope he 's right
but there is still a long way to go
it has yet to try its first case
both have been released from the hospital
there is n't he said
but it is not clear whether the case will go to trial
the public expected it
it was a close vote
i 'm trying to show you
there is no one like him
i did n't know that she said
she was then arrested
a u.n. spokesman said iraq is free to deal with any country it wants
we hope to do that over the next two months he said
he refused to say more
france denied the report
this is great she said
it has yet to be found
this is his third visit
they think it 's a game
you do n't need any money i said
a union official denied that
no other details were released late friday
the president can go for a home run
there 's really no way
we 're here to support him
the company refused further comment
they have denied those charges
his trial began thursday
a ruling was expected earlier this week
a run scored on that play
details of the court decision have never been made public
second take one day at a time
we want to see a vote today a u.s. official said
i could n't help it
that will likely not be for three months
a police spokesman said
wo n't do the same
it did not give further details of his condition
they have been there three years
i think we need months
she died a few months later
results are expected at the end of the week
that 's the way i work
no decision has been taken by the court
and this is one of them
it has always been close
however he did not have further details
the other one is that you are the only people who say we have to change
but there 's more to come
the final will be played thursday
they have got to show up
she died and i was not able to see her
it was a good day she said
i will never see them again
south korea agreed
is he going to win again
we used to say we were a team
a final decision is expected later this month
but he did not give any other details
but nothing will be same
i have no one she said
it was not a chance comment
this week it 's war
i really thought we could have won she said
the three other men have died
but it 's not finished yet
this is all they 've got
she has said she will appeal
it 's going to be a good race
there was no violence
we 've had a good start
i would not say this is the end she said
i have n't seen him for a while
there will always be people against peace
we would like to see them get out
the defense said it would appeal
we just do n't know that yet
you 've got to get going
he said at a news conference wednesday
they were there to be seen
i refused to do that
you do n't know the problem
i think he 's the one who 's going to do it
there 's no more time
police did not know their condition
final results were not expected tuesday
the military spokesman could not be reached for comment
we will go for the second
now this thing is a team problem
the report gave no details of his release
but we found a way to win another close game
this is my last chance
he declined to comment
can they keep it up
she wanted to help
i did n't think about it he said
the process is expected to take two days
i do n't like him and he does n't like me
they did not release further details
but we support each other
but it is different now
the bank denied the reports
but i do n't think we 'll have to
the ministry had no immediate comment on the report
a ruling could come at any time
the results were expected in three days
we can win he said
i ca n't believe it he said
british army officials denied the report
later he said that iraq refused
it will play the united states in its final group game monday
his statement said
it 's already planned
the reports quoted him as saying
it appeared to be the same group
we can release more the president said
i really want to play this game
it may be a year before we know
it did not give the number of injured
that 's all you want to do
the defense said there would be an immediate appeal
you get into the action
others however were not
u.n. officials denied that
they do n't have a job
but this may take several years
another four people were injured
but he did n't last long
details still have not been made public
there is no other way to appeal the court 's decision
we know he wants to be here
there was no immediate comment from israel on the report
she gave no details
we did it last time
this is their home state
i need this for my business
washington rejected this
right now we do n't see it
they 're trying their best he said
the fighting forces of new york
it 's just too close to call she said
they are not important
it 's his business
we do not need a force here
it was great to see
some things just do n't change
we do n't have any money she said
there was no comment from the security council
but there was no agreement
it is all business
they could n't stop us
we are still fighting these rebels
it 's so important to the game
i wanted to keep him going
i know i have a chance to make it
that is our good news for today he said
my family is very important to me
the united states says north korea must end its nuclear program immediately
i 've still got a chance
they 've got to win this one
but i did n't and i 'll go on
it 's great to be back
this case is closed
i think they 've been confirmed
he 's the leader of the party
no further talks were planned
but the judge refused
that 's the name of our game
i hope i 'm the one
they should be open
city officials said they 'll appeal the decision
we ca n't work like that
police could not be reached late thursday for comment
the court house was closed at the time of the attack
we just need to get open he said
the government also had no comment
shares closed down both days
if you have the money and you have the will power you can get things going
more charges are expected this week
that 's the way i take it
she did n't have that
and he may be right
it made a great show
i have n't had time to think about it
fighting is going on now he said
i think it 's a good thing
they always play to win
my problem is my problem if there even is a problem
i have n't been there in a while she said
we can all play this game
those talks began during the clinton administration
the government did not comment on the report
there is no such thing
i hope to keep it going
he had no immediate details about his condition
i thought he did a great job
the important thing is to work as a team
no one has been injured in any of those attacks
i think it is great he said
his office had no immediate comment
i did n't hit it great
the united states and south korea have denied it
official results are not expected until monday
the u.s. military confirmed the attack
that did it for me
the ministry declined comment
they know nothing of the game
they do n't get it
but they wo n't win the peace
that wo n't work for me
until then they will be allowed to keep their weapons
but one is more likely
the team had no other details
you should vote bush said
he has five children
israel 's military leaders said more attacks were likely
the group did not comment on the attack
we 've got to get it going
we are likely to see more he said
what was the big deal
hospital officials refused to comment
but he added that has n't been a problem
we 've taken our time
the third was also arrested at his home
there 's a lot of people that do n't like me
that 's all i 'm trying to do
you have to think about it
we had such a great system before he added
they also need a lot of help
the court is expected to make a final decision later this month
it declined to give more details
no one can take it away from me
i thought i was different
the police do n't keep the peace
they 're very important
china has denied the charges
he said the death was under investigation
the trial will continue next monday
he would n't give it to me
i was very public about that
i 'm going to put it out there
it would be the first such visit
i 've come to think of them as family
no decision was reached monday
the office did n't give further details
we 're going to do it
seven british men have reached the second round
the u.n. troops did not stop him
it was his third goal of the season
his report could not be immediately confirmed
i do n't think they have a chance he said
trade is our future he says
it 's still got a long way to go
i do n't think it 's an issue he said
i could never do that to them he said
results will be known later in the week
i hope it is going to change
i do n't see any problems
the trial is expected to last three months
it gave no further information
but we should go on
this went on for too long
that is our best hope to keep us going
they said they had n't until this time
we are for a free market
that vote was expected thursday
korea he told reporters
the u.s. state department has denied the reports
it 's got to be that way
the company had no immediate comment
its ruling was announced friday
another two police were injured
he is going to have that party
just work on my game
we can not and we should not
she had three points
if you do n't have any of those three you 've got a problem
they did not say what led them to believe that
that 's the best way to put it
but it should n't end here
some of them we do n't
an investigation was said to be under way
stock prices rose after the report 's release
it was n't possible she said
i think this agreement will do that
i tried to get the players to do the same
it is the right decision he said
that just got away from us
i believed that we could
the nation does n't want you
the defense ministry refused comment
i would like to win it
but he says help is on the way
i hope they support my decision
they are fighting the charges
that 's part of the problem he said
israel has refused
there was no immediate u.n. comment
more money was made
he 's got us to this point
i had nothing to do he said
he was arrested in new york last month and is being held by u.s. officials
it did not name the companies
now they have no need to be
officials reported no problems
the war had been won
all three had denied the charges
you do n't get into that situation again
he said she left the party earlier than the others
if you do n't back off you 're not going to make it
this area is n't even close
the bush administration has also taken no action
that 's what they did
who are those players
results were expected tuesday
no further details were given
they do n't have children
i have to believe i can win that match
we do not have any of that now
their weapons were taken away without a fight
but each match is different
and i do n't want to run
that 's not the point
it would not be the first time
that was my problem today
i hope he will be able to play this game
i have n't seen my family
i did n't think they could
the vote was n't even close
i support the team
i tried to fight it out there but she was just too good
he 's got a future
i want to play against the best players in the world
we 're so close to each other
i did the right decision
i had to get out of there he said
she made it to the third round of the french open
i hope it 's just one match
the stock index rose immediately
we will not take that way he said
the first will be last
we wo n't back off now
both countries have denied the charges
i will be president
the trial is expected to last 10 days
we did n't start the war
the israeli military had no immediate comment on the report
i think it made a great statement
it 's no different now he said
they are new he said
i need to take some time off
he left the same way
i do not believe there will be any problems
this is our first one
the military has made no comment since the election
still it is home despite all the problems
others do n't want to give up on their city
those results are expected next month
you get a lot of those
it 's the future of our world
they said they were very close
government officials declined further comment
if we can get two of the games it will be great
police officials declined to comment
we can not go on like this
we still have things we have to work out
the government plans to appeal
now i ca n't believe the team
it 's work he said
u.s. officials said they had no immediate comment
i just need a good round
it is a closed issue
she left the court without comment
five american soldiers died
i 'll have to start a new life
this man had good information he said
it 's time to win some games
but the results were the same
i do n't think they 're going to support that at all
more details were to be released wednesday
the four have asked to go to south korea
but nothing is like this
i have not won it yet
she declined to give any further information
it think it 's a good record
life must go on from here
i want to be just like that
and for the u.s. national team that 's good
they were released monday
i want to get it over with
many were won over
company officials could not be reached for comment
and most people had children
all agreed on two points
you always want to come out on top
he would not give further details
each team has played two games
others just want to be left in peace
new york has lost five of six
he was not immediately
they are not open to the public
his name has not been released
the opposition wants immediate elections
they did the right thing bush said
it will take place he added
he will also visit france
this could not be immediately confirmed by election authorities
they did not take any money from him
i really believe that
we have to go with what we have
one did n't even show up
there are n't that many
police would n't release other details
now it 's more business
if i hit a home run i hit a home run
government officials could not be reached for comment on the report
i know i do n't always show it
but that was not the case here
i 'll give it my best shot
we still have n't found our game
we are just officials
he also said the company will appeal
i did n't need people
i help the government
killed were seven men and two women
it 's the right thing to do
it 's a very important one
japanese share prices rose
so i would like to play here
he has not yet been charged
the second case was reported in the same area monday
he 's a great coach he said
i was trying to keep up with what i did last week
he 's always been like this
he lost his family
you ca n't get away from it
i killed my children she told authorities before she was arrested
police said federal charges were also possible
that 's a great team
we still have a job to do here
that 's all i want to know
there will be no further comment
i could do that today
the world cup is different
that 's just the way he is
she does n't have to do that
that 's been great
that was six years ago
it was his decision she said
the case is now on appeal
i did n't want to know
i do n't know what their problem is
and we 've got to change it
i think that 's clear he said
is there another way
that should n't be a problem this year
i would have to start over
the work will start this month
he will be added next year
that case is under appeal
officials say it will take two to three months
they can not run the country
both the report and the report
but i thought it could help me out
the second set was more even
he did not comment on his plans
the two are being held in new york
french officials said it was too early to say
but today there is no government
they also said no one was injured
you just got to work through it
no major violence was immediately reported
the trial had been scheduled to start on thursday
the report could not be immediately confirmed by authorities
they did n't want any troops
police said they had no further information
national defense is another
we know who will win
but he would n't say more
i played a good match
i did n't run for the world record
the office was closed monday and no one could be reached for comment
now we have to win two
this is as good as i can play he said
he refused to give his name to reporters
he told the meeting
i 'm going to try and do it again she said
i always have hope he said
the reports could not be confirmed
i know the way they play
the u.s. state department denied that
and that could take years
he was arrested three days later
i could n't see it
i think he can do that
it was a long one too
there was no immediate eu comment
if i could n't take him i would n't go she said
there was no one in the house
they are lost to their countries if they do not return he said
he said he would appeal tuesday 's ruling
i would n't change it for the world
but we can change it
early however it was defense
he is being held in the united states
we 're trying to work out all the details
clinton may visit north korea
there 's part of me that would like to be a part of it
french forces confirmed the attack
the statement said two rebels were killed
that may not be much of a victory
and take it from there
they 'll get another chance this week
we 've got to get up and go
i ca n't think of his name one says to the other
that has not been the american way
i want to help the team
few details were known
we 're trying to get them out he said
i 'm not going to make that statement
several others were injured
the united states had no immediate comment
but that 's one big game we want to win
i think they have good people he said
i just fell on him
that is what member states want
the team is still without a head coach
after all they 've tried to take his life
what 's his business
we do n't believe they have
she found that and more
the two companies declined to comment on the statement
it did n't stop him
rose was there too
we should n't give up hope he said
he did not name the nations
it called for talks on the issue
we have to play first
it was also his last
you have to win four games
they held talks that were closed to the press
he could n't keep up
that is what you think
it 's not what we wanted but it 's a good second
military officials refused to comment
not likely several analysts say
she said at the end
we are a great people
this then is the situation
the country already has
but he can run the show
if the results are not good i 'll go
this is a good thing
it 's not a trial against me he said
she 's come back on top
i just can not say
a hospital official refused to comment on his condition
he later left the country
it 's all or nothing he said
she could not comment further
opposition leaders had no immediate comment
but the police have taken no action
i want to see what 's on it
and they 're the best
it is n't our plan
on saturday he died
are we going to stop
the future will be for this nation
so we went on that
authorities have released little information about the investigation
it 's a big thing he said
last year the number was 10
that 's the big problem he told the associated press
i 've called him from here
two years later he won the u.s. open
it was n't her day
he 's had a great year
today was that day for us
i will work for the future he said
company officials would n't comment
if they do n't the law will go after them
i told them i wanted to do it
still it 's one game
they played just two games
i 'm working at it
they can last a month
he did not release any more details
but we know they ca n't give us the security we want
with my work i do n't see the need to start a family
we did n't get into details
no more talks were immediately scheduled
two people have been arrested in the case
it did n't give further details
so we 'll just have to see
you could n't stop it
i just want to do it
call it the final before the final
the defense ministry did not immediately comment
one palestinian was injured
six people were killed
he says he will not open an investigation
it 's no good to the public
we know this is the way to go
we just want an end to all this
it is being released thursday
i 'm going to do it again he says
but that 's a good thing
a ruling is expected this week
i wanted to get past the first round she said
he is still being held
i just want to give us a chance to win
he should have been home
these games will go on he said
but it 's not all good news
the government said it would appeal the ruling
he just did n't run
i 'm going to try it she said
but it was never like this
and i think that was the best move of the week
trial is scheduled for later this month
now that could change
the appeal was rejected by the court
he said it was one of the best days of his life
this is the united states
they were n't expected a thing
i will continue to do my work
there 's nothing we can do about that when china are the best
he too had one of those days
this is a good place to do it
it wo n't be their last
at the same time he is new to us
we do n't need them
i do n't think i would say that he said
it 's an important part of the office bush said
their condition was not clear
that 's no big deal
all my family members have come out
there will be no further talks
the conference will start next year
i was very little she said
that is too long he said
it also has allowed him to take off
we 've had no help from the government
it will be played sunday
we are not the police
i just think this is right
we have the forces we need to do the job he said
the united states did n't appeal against the decision
no action has been taken
that could be a problem for all of us he said
country has always been a lot like the stock market he said
he does n't have a record
official results are to be announced later this month
and i 've been hit before
still she plans to go again
the army did not comment immediately
israel 's army spokesman had no comment
we need help as a team
it was a lot of little things that got to us
both companies refused to comment on the reports
he did n't make it
who 's going to help
three people have died this week
the results will be announced monday
no problems had been reported monday
she never denied it
that has never been the case
and i 'm not going to give up on him
but this is not so
should n't do that
i have a thing to do he has a thing to do
i do n't believe that
it was the only match friday
police would n't release any details
that 's their place
the government says it has no money
i just wanted to visit the city
it is nothing you can force
he said he expected the next meeting to be held in about a week
you just had to be there
it is not our job to do this
the deal is expected to close later this year
she said he has the right to appeal
some said they could
his trial is scheduled to open next month
it was not clear whether he would
he has said he would like to move to the united states
this is a free market
it also would not release her name
an election is scheduled for next year
now he wo n't see her at all
i just do n't do that
nothing is going to be given
still there were a few
i think he will fight for it
who will do this job
but it was n't immediately known if that was possible
now there 's a problem
peace is about change she said
other groups denied that
he died without a fight
police had no immediate information about the attack
it gave no immediate details of charges against them
he said he did n't think about death
government officials refused to comment thursday
this may not always be possible
i do n't think they need me he said
i 've been through a lot he said
the last shot came on game point
they will be tried monday
this is what i have
russian officials did not immediately return a call seeking comment
i 'm going to use them
i hope you will support me now
we 're not going to stop here he said
he agreed to that too
the government was scheduled to appeal that ruling wednesday
it was all part of the plan he said
he said the company would not comment further
it was a political problem he said
this money must go back into the economy
but there are problems
she however denied that
he is from new york
he was not called on friday
and we want to win
he wanted more details
you win with people
but there was little agreement on who won
i lost all of them
for the most part they do n't want you to know who they are
but we do n't have time right now
you just do n't stop
i 'll see what is best for my people
but that was two days ago
government officials could not be reached for comment on the reports
i 've got family here
the military would not comment on the report
but that does n't give her a right to run
there was no way she was trying to get away
the government does not want this
some early results were expected tuesday
it was a good season
this year is no different
there is no security
the deal was expected to be announced wednesday
sunday was no different
i just played my own game
it does n't always work just right
i was fighting for a job
that ca n't be denied
we own nothing he said
i did n't have it working at that point
i think that 's a most important thing
it 's their problem he said
you 're a director
so many people want to see us
bank officials said no decision has been made
we do n't think that 's the case
its share now is 10 percent
they refused to give more details
they did not believe him
still bush is right in trying
four other people were released
israel says it must keep all of the city
authorities refused it six months later
it was a great week for me she said
there was no further information
he 's a family man
the two were arrested more than two years ago
police did not immediately release any further details
the white house has denied this
france is still a very good team
not people he said
i said i would have to get security to take them out
there is no such thing he said
but he points to another important issue
my business will go on without them
we did n't even try to play this way against france
she told the associated press
this was not the first round
it was said 10 years ago
government officials also denied that attack had taken place
it 's one of those things
i would have put up a fight
we need to give them what they need
israel said they would be held sunday
the agreement is working
from then there was no problem
we need to take our time
i thought i had found one
they are working for a family
any team can play one great game
can you give me any information on it
there is an investigation the ministry said
they have not been charged yet
they did n't know us
the investigation could take several months
he 's always played
he added he will be free
we just do our own thing
but it was also good
that would be great he said
it must change now
the election is scheduled for late next year
again the report could not be confirmed
parliament is expected to vote on the bill thursday
here are details on some of them
but there was more
she said she plans to keep working
that 's the way to do it
the council will judge
it did not say whether any were found
there 's still fighting
we have to work the problems out
authorities have released little information about the case
the ministry said in a statement
i do n't want it he said
most were released after a few days
but that 's going to change
japan said it could n't do that
they must come out and vote
two people died and 10 others were injured in the attack
no one has yet been charged
it was a great day
this has been one of them
but he said the men were the most important lead
i really thought my life was going to chance
we do not want to take it back to conference
the army spokesman declined comment
it was a good shot and i did n't think he was going to get up
no other details were given about him
it is already planned
it did not give further details of the agreement
he will start monday 's match
i have to play my best
but it appeared too late for that
he also refused to meet them
in washington u.s. officials also denied the report
who is going to be next
i got things i got to do
but she is not the only one
the others also face trial
israel 's foreign ministry had no comment
there 's nothing good
i do n't know what really is going on
many asked for help
now there is a government
it has been a great run
i thought he would come out fighting
that must be a record
both players had been injured for the first match
the man was released after two months
we 're trying to work it out he added
i was trying to force the issue he said
he refused further comment
you wo n't have to think about it
he had not yet been tried on those charges
it 's with my family
the opposition denied the charges
it 's not a season
they have a very good team
it is the first that people have been allowed to vote for
this is great news for us
he added that an investigation was under way
it has got to change
it was the second day of talks
you do n't know who 's going to have their day
it 's not a game he said
we all have the same goal
we are not going to do that
we have no problem with the united states
it 's against the law she said
but it has no known nuclear program
the results were announced after the market closed
all we can do is our best
in any case it will be a team with a new coach
we can not have one without the other
i do n't want more time he said
he was arrested later by police
now we have to move on
the president is the country 's top leader
government officials could not immediately be reached
the trial is expected to last four days
their future is not clear
it might not work for you
i should have known
i will be back he said
they did n't make that many
they ca n't do that to people
results were expected saturday
but i have not lost her
they would n't really know
i 've got my chance
two years later they began fighting government forces
we have n't given up she said
he did n't give any other details
but it has never been a major security issue
we 're going to play our game he said
a trial court agreed
there wo n't be peace
nothing can be that close bush said
we can do without them
the bank declined any further comment
it was the only way he said
there is no peace to keep
they would have got it
ministry officials could not immediately be reached for details
president clinton has said he is for that
it 's the best start of my life
their elections were announced tuesday
details had n't been released
the first round is thursday
most just want to get it over with
that 's match play
the war began two days later
she was allowed to keep it
there was no change
the company denied the charges
i just got to get through this he said
i do this in other countries
he was expected to appeal the ruling
i will not go home
he 's one of the family
details were to be announced wednesday
the u.s. military had no immediate information on an attack in that area
a third and final vote is planned for next week
if it does n't it 's out
they say it 's not going to last
we do n't know the future he added
this is not a government
but that was washington 's last lead
that is clear he said
this is the way of the world
that will not be a problem with a president bush
i hope a lot of things
that 's the way it 's always been
we 're not a u.s. company he said
she could have killed again
the investigation is going on
details of russia 's plan have not been released
the trial was the second for both men
but he also said i do n't see this as a major problem
this is the best system he said
i will go to his house
i was told this is a record
i do n't need them
but it 's still too early to call
there should be free elections
by law he can not run again
the appeal is likely to take months
i had to run my own race
there were no children
he had no comment friday
they never said they wanted nuclear weapons
the police said no one was arrested or injured
we have an investigation to go through he said
the conference began last friday and is scheduled to end this friday
the show is in its final season
his office could not immediately be reached for comment
elections i will have to do it
we 're trying to win out the season
the fighting has finished
a decision is expected thursday
you have to get used to working with people he says
we did n't want it to start that way but it has
can i win the race
the others were local officials
but i still got hit
both are now closed
i really do n't think we 're going to have much of a change he said
we have to be in control he said
it 's not possible he said
those are the things we ca n't control he added
it 's the only thing that 's left
it 's a problem of political will he said
two people died and five others were injured
the investigation could take several days
it could not back down
general elections are scheduled for next year
then it 's possible
he is now leader of the opposition
i do n't play that he said
it 's an open market
i was n't able to do that
there are no such plans he said
i ca n't do any of that
both countries have denied the reports
he died tuesday after he was taken off life support
the company announced
in that case we did n't
he took this right away from us
there was no official police statement
that was n't the case last year
the process was expected to be finished wednesday
the statement did not give any further details about the meeting
i do n't know what it is he said
police had no immediate details
results were expected late saturday
they are scheduled to be tried next month
other than that there was nothing
that 's the way the team will continue to play
the official died sunday
i never said that he said
race five is scheduled for saturday
they refused to comment further
we must now do our part
i know them and i still do n't like them
more is on the way
this is her number
officials there refused to comment
company officials could not immediately be reached for comment
that 's always been my goal and that 's my goal this week
we just came out of a war
the man died monday
i can not become a police force he said
we have to do it again
that 's the way it 's been all this year he said
court officials declined to comment on the case
the vote is expected to take place friday
they were not good with us
this is the only way
i 'm never going to give up he said
again it could n't
but that may change
she will not like to see it
but is it the end of the world
that 's been the case this week
a foreign ministry spokesman refused to comment
she says it 's working
he said there would be an investigation
she did not say whether any weapons were found
he wanted to end it
so i was seeking a change
i 'm in a great place
it was not known who killed the men
there are a lot of people who want peace here he said
a decision was expected as early as the end of the month
he has said he had nothing to do with the attack
it 's not going to stop he said
that may be part of their problem
but i think that was the right decision
it wo n't be like the first two games
still there is more
do we want to win this game
government troops are also there
if there 's any way he can play he 'll play
police could not be reached late tuesday for comment
but she has never won
we 've won those games
another meeting was held monday
still there should be no problem
the police department declined to comment on the ruling
but that 's not the case
i 'll have to think about it he said
but has he won them over
i began to get it he said
she was later allowed to go
the united states also took part
he wants to win it
we have to win in israel
details were expected to be given in a news conference later in the day
company officials could not be reached for comment late wednesday
we will have to match them again
one man has died of it
i wanted to win the fight
you want to win the match
what 's the state of it right now
it did n't have to be like this
that was part of the problem
in the long run it will not work he said
i think it would help us he said
things need to change
will they support him
both declined comment
the meeting was scheduled to continue friday
he said all four have asked to go to south korea
we will have to go to the united states
i do n't open this
the government however said they have seen no change
the report also found that
the united states has called for his release
the report could n't be confirmed
still that may not be the end of the issue
do they call the police
it is expected to run out in the next month
palestinian officials rejected the reported plan
i thought my time had already come
i 'm going to keep him
he just did n't like it
i 'll never give up
all three were taken away by police
officials refused to comment on the reports
but there was nothing to do
the time is right she said
they declined comment
the u.s. government did n't immediately comment
it is the first day of the new year
this is our time to make our statement
police also released no details
we had nothing to do with that he said
that 's a different game
his condition has not been released
the second will be held friday
but could it be three years
the japanese reached the second round for the first time
both were arrested
city officials could not immediately be reached for comment
it 's important to do that
the talks were scheduled to last one week
she 's working on it
but it wo n't work again
he had no information on his condition
the government has said it had been scheduled for last friday
still analysts said the stock was a good deal
they ca n't run away
there 's no other way to win
it 's a game she said
she said she would not make such a statement
they wanted to be american
but that 's what i see
it was the last thing i wanted to do
i would n't even say it was good
that was n't a decision to make he said
people want their money
i do n't believe that we should give up on this issue he said
this election is different from last time
the judge 's report has not been made public
it might have been too much time
with the french team it is never over
if it does n't work out it just does n't work out
final results were not expected until saturday
talks are expected to start later this year
there 's a new leader
i just want to play all the time
two others have closed
he had to work for it but he got it
the trial is likely to be long
it 's a business he said
play is scheduled to continue wednesday
he was arrested three months later
it 's like going out
that would be the end
that 's the system
but analysts still say there is a long way to go
he declined any further comment
we should have had this game
the company did not return a call seeking comment
we have no use of it
he said he had n't seen them before
we 're going to be the best team we can be next year
three other soldiers were injured
i do not think it is time to do that
i think he will try to win
that was expected in the next few days
he could have used it
wednesday 's games
the case is not closed
saturday was a little of both
i do n't want to say we 've made a decision
the israeli army did not comment immediately
the officials did n't immediately make a call
the situation is under control he said
we thought that we had a lot of support he said
it 's time to party
we 're trying to win
police said their investigation would continue
he told the associated press
he 's the only one who could stop me
it 's not the united states
but they could not see any fire
if i can do that i think i 'll have a chance
after that he was on his own
more talks were scheduled later in the day
i have never seen her play like that
we do n't have any money
authorities could not be immediately reached for comment
women had to go with him
the others would be released later
i thought a long time
they do n't have to
we are able to work with him and he is able to help with his defense
but i 've got to be on top of my game
but a military spokesman denied that
they 'll just try again next week
no one will help me
but it was not without problems
it 's got to be that good
you can never give up he said
the united nations refused to back down
it 's a different league
but this report is one they put it out before
that 's really important
however this can not be expected
the french government has refused
he had to do it all and he did
that 's no good she said
but it was n't any big deal
an army spokesman would not comment on the report
that case is closed
official results are expected later this week
there will be palestinian police
both are very important to the team
there have been similar problems before
four other soldiers were injured
i was n't able to do any of that she said
a decision could come early friday
they have been released
they did n't give any other details
its report could not immediately be confirmed
they think they are the best
this does not need to go on
the trial is expected to last until the end of the week
however the group 's report says
if he 's not he still has a chance
he had not yet been found
company officials declined comment friday
i was the local man
that report has never been confirmed by authorities
it was their second meeting this year
the issue went to the city council
there is one day left in the year
palestinian officials had no immediate comment
it would n't be right
five people have been killed this week
no talks have been held since last month
this is n't among them
he will do his job
i got it out of my system
he said they did not report any problems
there was no comment from the u.s. military
that lead did not last long
they 're going to do me right
it 's one of those things he said
first results were expected late saturday
we are trying to control the situation he said
it was a good play on his part
i do n't have a job he says
four tried before him
it is still a long way he said
it did n't work out today
no appeal is possible after friday 's ruling
it was not clear when the fighting took place
we came out on top
this fight 's not over
a decision is expected monday
the trial is expected to continue through the week
he did not give details of her condition
some say it is time to change the law
you need to be big
he is a former official with the world bank
the only thing i can do is do my job until they stop it
they gave it to me
until this week he was a wanted man
if we can help we will she said
the state plans to keep 10 percent of the company 's capital
it 's the business
it declined comment wednesday
it was not known if he did that
there is no appeal
you need to play a power game
their appeal is expected to take several months
two points are important here
and it may run and run
this was expected next month
i know what 's going to be expected of me
it was not clear what might have led to the attack
that was the final appeal
there 's no way we can do that
that 's the problem
you were a new world
she is not scheduled to meet with government leaders
he went on to win the game
i can not get it out
they 're all my children
he can be a big help
but you have to move on
police said no one was injured
a decision was expected tuesday
we could make money without really trying
two other people were arrested later
i think i did that
the two men are to meet again monday
we expected him to do so
police have refused to release any details
but i shot a good round today
but she made up most of the lost time
and that 's going to take months
the united states is international
i would just try to deal with it she said
that was a great game
that 's the only thing i can say
the bank later denied the report
we can do things here
i think it 's going to be a good race
it said the leader was arrested last year but gave no further details
but i think he 's got a future
and that has not always been the case
another meeting will be held next week
i wanted to play here he said
this is a war which is going on he told reporters
it is the will of our people
she said he would fight the charges
it 's the system he said
she refused to comment further on the case
the area has been very good to me he said
i wanted to continue to play he said
i never thought they would do that she said
they are so strong
now i will vote for him
you have to want to win he said
we can see that in the new
i do n't like what you did
i do n't know who did it he said
the press group asked
it was n't known if he would appeal
it 's been that way for a long time
i do n't want to go back she says
if we could help we would but we can do nothing
he also said he wanted to come home
states do n't have to do this he said
it 's the only place i know
i do n't think this is an issue
just nothing went to plan
the meeting is scheduled tuesday
u.s. officials could not be reached thursday for comment
i did n't know that she says
general elections are planned for later this year
now is the time to support the team
police would not immediately comment
she made the most of it
i do not know that name
he was expected to be released by thursday
i do n't think i would have made it
police said another russian had killed him but gave no further details
i just have to move on
i 've been trying to get information he said
but soldiers did nothing
the trial is expected to take two days
authorities had no further details about that death
we need to continue these
i try to keep going
we wo n't stop them
he said she will never see again
we need to continue talks about the russian plan he said
the money is so big he said
who 's going to play i do n't know
it will be a big party
they should think about their own future
there was a match to be played
two members were released
foreign reporters were not allowed to go to the north
i believe he will not stop here
a decision will be made by thursday
i just have n't won
my goal is to be part of another world cup
it has n't always been that way
he said they later left
they 're very good
it 's time he gave up
the union denied the charges
both left the hospital
several people were injured in the violence
the u.s. state department did not immediately comment on friday 's decision
the u.s. and south korea have denied it
bush did not immediately appeal
the other leaders are also at home
it is a european problem
if i can win the race i try to win the race
he did n't give any details
he said he would appeal
he refused to give his family name
no elections were held
we used to fight against them
i know you did n't like that
this should not be the case
we do n't want them to do that
this is one of the best days of my life
no further information was given
the report was released wednesday
it was made because of the game they play
he asked for her home number
the clinton administration agreed
you were just white
we take this as part of our work
court officials could not immediately be reached for comment on the report
we ca n't be a local government
they are too good of a team
a u.s. military spokesman had no immediate information
it does not include money
that may be part of her appeal
so what will it be
we want you to do this
the game will continue friday
the report did not give any details about those injured
no government officials took part
but that 's the way it is
it 's known as job security
the troops later left
then he said he could do it for me
her campaign could use the help
i know one way to play it
that report could not be confirmed however
i know what they want
i think it 's going to be a great year he said
we got to go win games
the israeli military denied that
it had been scheduled for next wednesday
officials had no immediate public comment on the report
the decision could take up to two days
i can not believe it she said
he is expected to return to action late this year
the defense agency refused immediate comment on the reports
he did not return to the game
you ca n't think about that
a defense ministry spokesman said he had no official information on such an action
i just have to keep going
you just ca n't see what 's going on he said
we need to stop it
they came to the right place to do it
they were to meet again friday
this would be the fight of the year
we have to get on with life
now you 've got it
my game is close to being right he said
he has never lost a world cup match
the united nations has denied the report
here 's a number that says it all
i just did n't like me
when it was over he said
it was an important thing in my life
however israel said it would not return the man
they were later killed by government forces
he 's going to be all right
you ca n't have one without the other
but it 's been great
we could have won the race today
he said he could not say more
he had to work for it
he has denied these charges
i know they did it and they know they did it
the government refused to comment on those reports
you 've got to go with it
the others were shot
i think the situation will change from the results of these talks he said
but to me that was important
there 's no way he can stop me
she declined to comment on the report
i think we can try it again he said
they ca n't control my life
i could n't help him
there was no report from u.s. officials
he 's very able to do those things
but this is n't the end of our season
if they can work we should support them
for now she has help
i get these things in my head
it released no further details
the men were arrested by police
she said the case had not been confirmed
this is not american she said
we now have a government he told them
this is the way we wanted to come back
the appeal could take months
i try to take some time off
we can play with people
they were released after several days
it gave no details about the arrested man
and people should know that
president clinton is a free man
this was my decision to do this
we will be trying to win the group
i was able to get it going
we support both of them
it was a very close call
it is the way of the world
we 're not used to this
team officials could not be reached for comment
there is a chance he said
there 's a great deal of power in the team
four others were arrested later
i want this to be the fight of my life he said
it is the only time my name could be next to him
police said six of the injured were army soldiers
and i get to see the country
but security is an issue
and this is a part of it
i really wanted to get into that final group
that was not confirmed
we have reached no agreement he said
that 's what we wanted
the french have been asked to lead the force
we will not go back
and now i could really use this job
things would never be the same again
that report could n't be confirmed
they did n't want this
there was no fighting friday
bush administration
he has not been seen in public since then
we 'll only use that many
that 's one of china 's problems
but there were no immediate reports of violence
union leaders could n't immediately be reached for comment
that should change this week
some say it wo n't be a problem
but that 's going to change this year
federal officials have refused to say what charges he might face
we are the government
these also include soldiers
i do n't think i really had a chance to play out there
she does n't have to work at it
police then shot and killed the man
we 've had great support
there is n't any opposition he told foreign reporters
bank officials could not be reached for comment
he wants to go back
she had not been charged
he refused to release any details of the agreement
if you have money they take it
it is a lot like the peace process
it was the second case confirmed this year
the game will be played sunday
reporters were not able to see him
i just did n't have it today
they can do many things to help people
who would need an army
france and china are not members
they killed a million people
i ca n't see what the problem is
we could really use it
it might be possible
the court was told
but after that she says
the lead did n't last long
it was a great game
they now have six children
there are always a number of things you can do he said
the results were released after the market closed on thursday
he could be right the president said
he is expected to return next week
you could n't change it
there 's no security here
he could not be reached for comment friday
i know he does not like that
we wanted to continue that
they see a lot of problems with the children and they are n't able to help
it is not good he said
he won the war today
her condition was n't immediately known
then i want to get into the top 10
they still have a chance to win another
he said at the start of the trial
the trial is closed to the public
they could do that
i just want to know
but i do n't think that
but they are not the only problems
it never had a chance
we just have to do our job
there could be several
and we 're going to show up
the hospital did not comment on her condition
that 's really going to help our game
she declined comment
this bill will do that
some of us had given up
it 's the right thing he said
you might not want to face that
two soldiers were injured during the attack
her children were not
he did not comment on the case
i think the war is over
then it was n't the right time
i just could n't get going
the government will release that report on wednesday
a trial is not expected until next year
we hope this is n't the case
it 's good company
the results were released after the market 's close
but things do n't work that way
but clinton did not give up
i should n't have to change she said
the union could not be reached for comment late monday
he said money was never an issue
the white house also announced they were to be released
they could have been killed he said
but that 's not a major problem
it 's been too long he said
i 've got two other women
there 's no army to fight
now peace may come
but this is not my thing
we know what 's been said
there are problems she said
one had already left the country
we play to win all the time he said
the company released results after the market closed
these problems are new for them
the vote could be very close
she lost in the third round of the u.s. open
the officials said the meeting would be a working visit
white is on fire she said
he also died at the hospital
i would like to think not
but he could have had more
he refused further details
we ca n't go on like this
he does n't think about much
but he 's the best in the world
we did not want this war
we 're going to see
then i can go home and keep fighting
we 're going to continue to fight
they did not say who had made the call
but i did n't know he was injured
i know he wanted me to do my best
i had planned my life with her
it did not give any other details
that 's all they can do
you would think those would have been taken first
he lost in the first round
the two men have denied the charges
so i do n't want to get into that
the official agency gave no further details
the u.s. military had no immediate information
authorities could not be reached for comment thursday
you 've got to move on
that 's just one of many
our work is now over she said
so he went out and had his best game of the season
we were not able to do it in the meeting today
but he was n't about to back down
i just went with them
there is little to be made of this
they would get a trial first he added
there were no reports of fighting sunday
south korea has yet to win
i do n't even have a house he said
that 's their problem
we do n't want to see that
he planned to return to washington on wednesday
that 's what the people want
japan has been good to me he said
we need help he said
so i 'm going to try to play a good round
many are still open
he was expected to visit again next week
i have not seen that the u.s. official said
it will not immediately end the war
that 's home she said
the other three men got away
i came and got what i wanted he said
it is not the same force
the leaders are the leaders
and i thought about it today
he asked to be released
i 'm not going to give up
all this could change
it 's part of life
he 's been like that since he 's been here
i just could n't face it before she said
american officials had no comment
he was not reported injured
she 's still there
he was arrested after the attack
government officials denied there was a major problem
china 's foreign ministry did not comment
he did n't return to the game
my children are all i have left
but i did what was right
you think he will now
his life has never been the same
we want first place
i was not after the money
they were arrested earlier this month
she was really strong
there was no immediate comment on the decision from government officials
if the people want it they can have it she said
a week later the two meet in the final
i want to win another one
it does n't close down
a vote is expected wednesday
i hope i can do it this time
that is all you can do
and injured he was
the deal was expected to be announced as early as thursday
he had been shot in the back
and now they ca n't
then i will work with them
he has never been charged
it 's important to make a record the judge said
this is our home here she said
now it 's called business
you want to go on with life she said
this team has a lot of fight
i was injured and i did n't want to come here he said
hospital officials could not be immediately reached for comment
a lot has to do with the players we get back
stock prices also rose
we will win the world cup
i do n't really like him
this is a family decision
i wo n't give you her name
one can never give up on peace he said
however it declined to take immediate action
for the peace of my years
i do n't think i would 've made it to seven months he said
they had to make a business decision
i do n't fight with the soldiers he said
no decision was reached
the military had no comment on the report
the report has not yet been released to the public
talks were likely to last several days
he died before he could visit the family again
people come and they go
he has the right to appeal
i ca n't believe i 've won it again
i thought about that too
it is likely to be released later this year
it 's different she says
he was arrested thursday
the u.s. team says it will appeal the ruling
they have three children
no one was immediately charged
it 's so different
a final ruling is expected later this year
we 've been through a lot
it is russia 's second such international show
keep it in play he said
we just did n't come out on top this game
government officials could not immediately be reached for further comment
i could n't trade my players
the union can appeal the court decision
he wanted to attack me
he asked the court
it took me out of my game plan
we are strong people
we believed our government
however they agreed to meet again next thursday
the government had no immediate comment
i hope people will come out
no decision has been reached in that case
i do n't believe in that
i think they 've used me she said
he did n't have further information
after that i do n't know
the decision will be announced next year
and you ca n't have one without the other
the police have to go
that 's not our job he said
that 's now the case he said
the spokesman said he had no further information
this does n't make up for it
i 've never played with him
we are not a police force
she made no other comment
we just have to deal with it
also we 're family
but he says he can not move
the israeli military declined to comment immediately
we may have one by the end of the u.s. open
this year however is different
they tried to fire him for it
she denied the reports
but that 's when his round took off
that win was also over france
that 's not my family
there was n't much
i just did n't want to deal with it
i thought it was against the law
there is no scheduled meeting
that is their system he said
i always want to hit that home run
the u.s. military has denied the charges
they are saying i will not return
that time has run without a deal
i hope the new president will do this
you ca n't believe it
i 'm not used to it
he is not expected to win
he was right about that
all this is so new to us
if it does not there will be a problem
he took office a month ago
the talks are expected to continue until friday
we 've lost our hope
she 's the only one
if we do that then we 'll be in business he added
it 's our time he says
this is a big game
i do not believe he did it she said
it 's a great place to be
it 's a second home
people will know who we are
if you have it you can do it
she does n't want to do that
this is not the end he said
that time has now come he said
we lost a lot he said
i 'm not going to stop him
clinton never went
the trial has already become a campaign issue
he said he did n't want us on the show she said
but she could not be a man
it was never allowed to meet
he could not be reached for details
now she says she will
they think that it should be over
he was not the only one
police did not comment immediately
the trial was expected to last until friday
he said it was very important that they continue to do this
a family ca n't go
that 's five years
will they continue to be able to do that
the accused had not been charged
i took the most important race of the year
i do n't know what that is
these people are not like that she said
iraq had no immediate comment
he went to the hospital
it could be a while
we are going to go
it 's a start he said
the game will be played friday
it 's a very good thing
this is part of life today
this is a problem for us
officials there reported his death
it 's all good news
to me it 's not a big deal
it 's time to move me
i came to fight for that today
it was a long year
it is time to take action
the united states has said it would not meet that goal
they are likely to meet again next month
he said the family did n't have much money
this was not our decision
we just ca n't do it
one union member was killed
all were shot by security forces
the election is set for next month
i think that is good news he said
then i got arrested
home run to win the game
the city has refused
it was a who 's who that really was n't
we are not fighting against its government
they however gave no details
i do n't think it was a lot
we know we have a good team
he gave no details of the deal
the first game is always the most important he said
the foreign ministry declined to comment
we were right there
the men were to have been released wednesday
you really like me
that 's not very likely
i do n't think like that
now it 's expected
no details were announced wednesday
he would not comment further on the report
he died two days later
there was no immediate israeli army comment
it 's great to see him
we have to support each other
he had to be taken to the hospital
he 's got that chance now
the investigation is still under way
u.n. officials could not be reached for comment
bush has reached out to the united nations
we still have a lot to do she said
now officials say it could take three months
officials have declined to comment on the talks
it really was for her
the six men were killed by police
he took down only one
or they 'll make do with the free time
many people thought we were going to do that
i just did n't have it
and they must get what they need
but we will never know
saturday was the last day
and i think that 's the way it should be
the government says that number is too high
u.s. military officials had no immediate comment
he refused any comment
this is the only one that does n't want to win
both were expected
that 's the most important thing she said
it is not known if any have been charged
i have n't made that decision
they did not see him again
and he has played in big games before
these games are great to play in
authorities declined to release the man 's name
and that was his final point
nothing was any good
i think there are always people with him she said
they 'll never say the war 's over
those talks were expected to continue friday
they were arrested
it 's very possible
that is likely to end now
if that was the case she would have taken them all
the foreign ministry declined to give details
the reports have never been confirmed
there 's too much news
you never know when it 's the last one
he said he had not
he did with little problem
i thought about them
it 's time for peace
authorities declined to give further details
a final report is expected next thursday
we will try to control security forces he said
no major problems were found
we had a very good meeting he said
they have nothing to do with the united nations he said
police said seven people died
the talks began monday
but it may be too late
the rebels refused
she would not give her first name
she added that the deal could be closed by the end of the week
i hope not but they could be
you just have to know him
who has the right to be there
it was n't one day
it 's really run by them
i think we did a great job he said
two had left the hospital
the officials did n't do that
security officials could not be reached for comment wednesday
he says he will run
he will have nothing
they released the shares last week
there was nothing they could do
washington denied that
they just never gave up he said
he said he did not give israel any information
he talks and talks
the final was scheduled later
first it was his money
some say it has not come at all
the face is on show
the deal is expected to be announced thursday
but we 've won two games without him now
now we have only five
the clinton administration killed the program late last year
to me it 's not clear
we have been there a long time
the general has denied the charges
they released it monday
i 'm a good president he said
it 's not even close
he 's got to work on that
that 's what she wanted
there have n't been that many
they are expected to be charged in court later
he said the three were killed wednesday
now he is finished
and we will continue
the appeal appeared to be working
i do n't think it 's that big a deal
this is our only chance
it was a decision he had to make
she made me believe i could make it
it should not have been made
still he 's got some work left
who has all that money
we have tried our best
they play great defense
he just had to have one
this was their second trial
the spokesman refused to give any further details
i do n't want to be president he says
if i could have killed them i would
the state department would not comment on the case friday
if it 's a big name it 's a big name
there are more important things than this he said
they play to win it all
last year that began to change
this has been set up for a long time
police did not release other details
that was really good
in france people can not judge the way they want to judge he said
some are government officials
the two are expected to meet again wednesday
he does n't time these things
a decision was expected before the end of the week
do n't play their game
those talks could take up to a year
but we still found a way to win
and that was the case today
he did not have details of the meeting
i united the party
the official took no action
it said in a statement
the report was released late thursday
he will be out for one year
that is the problem
a bank spokesman refused to comment on the report
i think it would help the public
she never got a chance
they think they have no future
this did not stop there
i could not stop going she said
i have a chance to win
but we have to do our part
he planned to try again friday
but that will start to change
it will be a great party
but we did n't know that did we
but i still have to play
but i had to do it
we will just have to continue to work on our defense
it was not so strong he said
he does not want a job
the minister asked
no decision has been taken
i 'm not used to that
then they shot her
she added we do n't want a war
there 's nothing he said
that 's most important
but they have made no such information public
he was found by her
they want to make a statement
he said the company will appeal
but they would not comment on any talks he had
no financial details were released
we had to play it out
we know that time is money
this week is very important to me price said
we ca n't force him
it 's still good news
he did n't want to come down
they know what is going on
and i ca n't do that
no people were injured
they made a statement
it might be all right and it might not
he does n't need all that help
it 's just so different he said
we will not be bush told reporters
but we will take the decision
and that 's a good thing
the israeli police had no comment
what is this support
officials could not be reached for comment
they 're always in my face
israel had no immediate public comment
he was very strong
it just is n't the same
but the most important thing is saturday 's match
we 'll try next year
it 's that time again
i want to play and i ca n't play
she 's been injured
five soldiers were killed
they would not say whether they planned to do so
but all is not lost
but the decision has n't been made yet
he did not immediately comment to reporters
you do n't have to be working in an office
he just wanted to get back on the court
they do n't have time
you can just see it
they are held against their will he said
there 's no other way he said
the british have made more money
do you know what it is
most were released
then i found these children
i want to see change
we all know of the people problems in companies
there should n't be one
no officials have been charged in the case
we can not force the peace he said
he had no details about the people who died
we do n't see that he said
both just might work
it 's not family money
i really believe that and i think they believe i can help them win
and what 's the state of that force
i still give him that chance
the defense ministry denied the report
it just would n't work
i always believed i could do it he said
the japanese foreign ministry declined to comment
the military has n't confirmed the reports
details are expected to be released monday
that 's the way i want to go
i did n't close the deal
but they could n't make another big run and did n't make another run
he would n't give details
but we put up with all this
this is a good day
i know they 're going to come washington said
you just ca n't do that
local police refused to comment
this war could be going on for a long time
i 've always said that
no decision had been made for sunday
he did not give his name
there may be some people who do n't like that
it may not be the last
you do n't stop life
you know he must not be
no details have been announced
that will be up to the court
he was trying to become the first to win it with two different countries
by then the only race was for second place
it 's reached the point of no return
last week i had the chance
the reporters left
the troops are still there
the government had no comment on that report
so i ca n't say that i will win
the vote is wednesday
police denied there had been any use of force
we had one problem after another today
the military had no comment on the attack
and that is a good thing
a ruling is expected next week
but he said the group had a right to attack the united states
three state department workers were injured
it was like he never said it
so there must be a need for it
i never found my game
we do not want to end up like them
we need political action
i 'll have to she said
city officials had no immediate comment
but he still have to be at his best
people will just continue to be killed
i have to think more
but even the players are saying it might be time
the official said talks on the issue have been going on for some time
there was no u.s. report about it
we do not want to go to the government
iraq had no immediate comment on the report
you 'll be part of the family
he said he had a plan
the plan is in place
i 'll think about it at the end of the year
they might not like what they see
the time has not been announced
i did n't even know him
i called out to one
it was a good start for me
however they will not be allowed to vote or run for office
and if things work out they work out
i also do n't want to get shot
palestinian officials could not be immediately reached for comment
i know that that 's not possible
that 's because there was no business
the violence must end he said
but they should see it first
they just said they wanted to go home for the new year he said
he 'll be back when we need him
we just did n't play very good defense
he is seeking his first victory of the year
but it could be the last
there will be others
we will deal with him bush said
that 's all i wanted
she has n't got a chance he said
if he can play we 'll play him
but some are fighting back
and i know we want to play our best game
russia has no points
and we want them now
i could not believe it
we gave them a good run for their money he said
they told us not to move
he did n't even know it
the man 's name has not been released by police
the group has not said whether it will appeal
i just need to get going
local officials could not be reached for comment
it is a race against time he said
you just could n't see it
the court decision came after the market 's close wednesday
this is the first one
but it did n't work
we tried for a second goal but we could n't get it he said
it did n't get through
that 's the problem he said
she will take office early next month
further details have not been released
these things take time he says
we wo n't give it away
he 's won this race
all the work of the last two years is for nothing
bush was a company director at the time
court officials could not be immediately reached for comment
the israeli army also did not immediately comment
that process could take another year
we still believe that is possible
final results were expected later this week
friday 's meeting was being held at his home
this win was very important he said
the party official refused to comment on the report
that is our problem
it 's the one with the weapons
we own this process he said
but i want to get past it
he said he believed they had been killed
that was the case monday
we just have a good time
it 's not right she said
the judge did not immediately return a call seeking comment
he was second until the ruling was made
it is not political
he also has scored four
what is going on here
money was never the issue
and it may never be
it 's not like there 's been one thing
the good thing is that no one was killed
now i 'm not he said
but we might not be able to do it by then
there will be a press conference
the trial was called off
i hope i can do the same
police denied they used violence
we have no life here
an army major was also killed
the fight is n't over
so what 's the deal here
i think i 'm going to get it
now they 've got two
i would say it 's going to take us the next three to five years
but he did n't have his best day
police said two people were arrested
she made no immediate comment
you have to play a new game
it did not say who was arrested
i said this is the chance i want
police did not release any further details
he was being held in iraq by u.s. authorities
but we also got two more years
he said a decision would be made later
both games are set for saturday
that 's the first thing i 'm going to do
official results were n't expected until monday
that 's the best way there is
it 's just one of those things he said
that 's the way it should be in this league
monday will be different
he has not been charged
for us that 's good
i want to keep trying
it was the best time for me
i have no further comment
he always played to win
i will continue to work for peace he said
he just talks to you
several others are injured
israel also has a u.s. free trade deal
this is a time we could do it
now i want to help
the agreement was announced a month ago
it was n't planned she said
because they do n't want peace they do n't want peace
this is a good job
he earlier denied the charges
he did not name the company
we 're going to take it
it was n't always big he said
no major violence was reported
we will not stop them
she died later in a hospital
it was a good thing
the league is more important right now
i think i did the right thing he said
they had had no children
police said a judge was injured
it was so close to home she said
there is nothing to be said
however he declined to name them
he is to face a second trial on similar charges
but i do n't think he will do that
for investigation it said
some things never change
it should be released later this year
he could be immediately reached for comment after friday 's vote
he was the u.n. in a way
a decision will be made before the end of the year
she could not be reached for comment friday
i know that i have
you 'll never get the point back from me
it is very important she said
the two countries have denied the charges
that first game will be like a final he said
police said he had not been arrested or charged
he did not immediately return a call seeking details
he said he would issue a decision by the end of next week
it 's great to see
government officials could not immediately be reached for comment monday
most people have n't
a police spokesman confirmed the name
the other members are
i just work he said
another man was also killed
he was arrested at the hospital without a fight
and they have got a right to do so
results are to be announced wednesday
it 's a different situation
he 'll be great leader for us
the second round was being played later friday
we have to face the future
no immediate action was taken
we are even more united
all were scored on the power play
he did not comment to reporters
final results were announced friday
we were going to make a new world
i did n't like to see it
i did and i just tried to keep it going
it might have been different
we must be clear on this
there was no immediate comment from the rebels
officials declined to comment on the reports
i did n't really believe i could win
the court 's ruling is expected tuesday
i never thought about that
he told me to come in
the reports were not confirmed by the government
but we were all children
the military denied the charges
the family took her in
i know a lot of people like it
you always want to go against the best he said
no soldiers were injured
we want to help he said
they gave not other details
it will be the players cup
family members could not immediately be reached for details
there 's always next year
he said he can do little to stop them
the second set was more of the same
she died earlier this month
we have no official information
the vote is expected next month
it will change a lot of things
both have a long way to go
there was no violence and police did n't use force
the attack was not reported until sunday
it was n't their decision he said
we wo n't do it again
we are against the government
i can do what i want
any ruling was expected to go against the united states
we 'll try to get the best deal
they are a very good team
you do n't think he 'll be able to get down
there was no immediate comment from u.n. officials
that was just the start
no further information was released
it 's not going to stop the court
on tuesday another five people died
so that 's the great thing about it
he did not have details about their condition
his office declined to release any details
we just did it all
i think she should run her race
i want to be one of the best of the best
on new year 's day she died
the program is in its second year
that 's not always been the case
i hope i can give her a good match
the white house and state department declined comment
a ruling is expected wednesday
i would n't say he won
he would not comment on the investigation
it 's just a great win
he refused to name the company
a company spokesman said both men would appeal
that can not be right
he has been held there since wednesday
we wo n't be able to put that down she said
another six people were injured
the party scheduled another meeting saturday
an israeli army spokesman declined to comment on the move
the year is about to end
we have to get through this
we 've got to take action now she said
u.s. investigation report
do you think people would have believed them
i think it 's part of the american process
but it 's not like that
local people rose against them
that was my goal for today and i did it
i 've always said it
he refused to give his name
they said several people were arrested
japan 's defense ministry had no comment on the record
the government declined immediate comment on the case
there 's no place to go
it has hit the united states
several children were among the injured
four others have been arrested
he said at the time
the show was great
they expected to meet him again thursday
now we have to give it a chance
many ca n't do it on their own
police did not release the name of the arrested man
he did not say whether any soldiers had been arrested
it will never change for me she said
her players did not meet with the press
her report was released wednesday
yet it is close to his work
we 're not going to change
we have to work through those problems
they played too good
no final decision will be made for a year
i do n't think it 's that close
israel already has such agreement with the eu
army officials said they would try again thursday
i do n't think that
two injured friday
it 's time for action
but that was just the start
he has denied the charges
the league had no comment
she declined any further details
several leaders were killed
he said he still had hope for peace
and we will have our people there
but this is what is right
but this could n't go on
we support the president
we did n't always have that
if you do n't give it to them they still want to know
there is no place to put them
we have a job to do
this is what we need
but others see a different world
it was a good win for me
i think that will help us out
it 's the economic situation
i want you to play for another year
seven children were among the injured
israel denied that
keep off my country
this year i 've played a lot
this team has many great players
the two men said they did not know each other
but that 's just the start
that 's not what they did
it was and is my political home
we tried and tried
i wanted to win she said
you have to think through
many others have been saying it
others fell when they charged
we have four children
they did n't make it
we will do the same
i can not call it for him
i know he will do it again
he was tried in a british military court
you never know she said
it was n't a good run
it 's not very good
he was a top official in the defense ministry
israeli officials refused to comment
the military denied the attack
he plans to appeal
it 's all the same family
most were never seen again
company officials also declined to comment
we have a good chance
we have two children
he did not comment on the third condition
one man died after being shot in the face
that 's the first time i can say that
i think she has a big future
there were no reports of any violence
he did a great job
our best defense is our results he said
who would want such a job
and there 's little chance they will
the government has denied the charges
now it is not the case
it 's all i wanted to become
it was announced thursday
police gave no further information
if he did n't see it he should n't call it
it was their final call
you made it very clear
people were saying it could be his year
but other than that it was a great day
we can do it that way
the change was expected
the company can appeal
this one is different
this is her decision
this was another first
local elections would be held next year
i wanted to do good things she said last year
it 's the first of many
they want to come back
the company 's shares rose on the news
do n't you think that it would have come up
he was right there
i got to know my family
france is the last chance
we have been able to say what we wanted he said
it did not immediately comment on the deal
it 's just part of it
police said further charges were possible
this is our president 's home
the high court refused without comment
you have to do that
he said he did not know further details
he wo n't be going home
it was n't clear whether the official had been killed
we did that and now we have to win
this is not the only hospital to see this he said
he could not give any further details
he wanted to make a statement
you just go with that
no results were announced
the price is now the top issue
their number is not known
i want to fight the government
i never thought i would do it again he said
i just try to get out of the way
you can not take a chance
we have a problem here he said
he did not name them
we won the cup last year but i did n't play
she just would n't
there was no comment from the government
we 've got to be able to win these games
i think it 's good
it 's a great show
but it does n't last
she said she plans a further appeal
these things take time
i do n't think they 'll start now
so we are trying to do this
i do not believe it she said
we could n't believe it she said
but i would n't do that
the rebels could not immediately be reached for comment
he would have become the third member from the united states
i think we are there he said
it might be three years
it 's great to be able to be an american she said
i have n't run in a while
there has to be an agreement
he planned to appeal
i 'm here to do a job he added
parliament is expected to vote on the bill before the end of the year
but that 's not a problem
he should never play again
i 'll still do it she said
the white house had no immediate comment on the meeting
you name it he said
it 's been two days
i just did n't think about it
then i would think of a new team
i own it right now he said
many said they wanted peace
i 'll be able to play in the next round
we 've got to go back and get the last game
he declined to press charges
they can see into the future
the report did n't give details
we will continue to fight he said
she released no further comment
right now just is n't the time
that took her out of the race
the problems here are different
there was some good economic news to open the visit
iraq is one of them
a decision should be made next year
it was a really good thing to do
you have to keep working on these things
she was able to get away and call police
the army declined to comment
the talks continue saturday
i played one shot at a time
and i think it 's important to show that
the french government had no immediate comment
the action has the support of the local council
officials said they wo n't know who won for days
but it will take some time
no deal was closed
now we have our first victory
i think i can do all of it
they said this time will be different
but that 's only part of it
we have n't had that chance for a long time
he was not charged
officials did not immediately comment
u.s. officials have denied the charges
i can get used to that
she has six children
this is the last of what i have she said
but i did n't know i was going to meet one
and he does a good job
my time will come he said
u.s. officials had no immediate comment on the statement
she does n't win any free points
it 's a major major deal
they refused to give details
there 's not a chance that there 's going to be a deal he said
i know what 's going on
so put it on trial
but again we must do more
he did not comment on the deal
company workers own the other 10 percent
he asked in a statement
i 'm not going to make it for you
will it be a world record
a final decision was expected next month
many went to the united states
but it 's been close
it was not the case
we do n't really know any different
i have n't been there in a while
they have nothing to do with it he said
but he 's not my only problem
there was nothing i could do
i have n't seen any help
you can change things
if i had n't got this one i would n't have made it
i do n't think we 'll have that situation at all
this is a free country
and they want peace
you will get through this
he said soldiers killed three of the rebels
he said the investigation would continue
but she refused to comment
the ministry did not give details
if i need more i will take more
i do n't think it 's right he said
police had no immediate comment
the army denied the report
i want people to know that
it 's not a big deal
i 'll never have her back
but she wants things to change
that 's not the goal of the law
it 's too late for that he said
the military also refused comment on that report
he did n't give details
she told him that she did not have it
and this is really different
he did not name any group
they were part of the law
i try not to judge
i will vote for him again
she is a part of my life he said
he said the situation is under control
we know there is a problem
he said more details would be released later
but he added this was not a condition for the investigation
we do n't have any information for you at this time
the talks were held by high officials
they also had reached a decision
he did not meet with any government members
it may never go to trial
it is scheduled to last a week
you meet a lot of people
the office will open next month
united declined comment
there is no need for one
this will not work he said
but there is not final agreement on all the details
it will not change
i ca n't believe this
both men had been held since tuesday
i just took a chance and got it
he 's such a big part of the game
it 's for men and women
some of us are still there
a decision could come thursday
they died two days later
i think i need to do it
the final will be held by the end of this year
this will take some time
he did not record a point
it just ca n't continue
four people were reported injured
we got good results
they have to believe
it does n't make money
but they had not been able to work out the details
no other details were made public
but he has not made the right decision
i thought we had a chance to go all the way
there was no immediate comment from police or the government
but things did n't work out from the start
the final round is set for sunday
more talks were scheduled friday
the trial was scheduled to continue friday
the government is expected to make its decision early next year
police officials could not be reached for comment thursday
i want to help my family right now she said
it 's always the way
this is a very good start he said
he said one man was injured but gave no details
no u.s. soldiers were injured
police did not stop them
the council is expected to meet wednesday
but it is what it is
this could be just the start
she was expected to be released thursday
the official said he had no other details
we do n't really know
we did n't like it all he said
he was never charged
we need peace she told a news conference
this is not the case the minister said
we have to make the future
i see it as my job he said
you never get used to that
there were no other details of his situation
the elections are scheduled for sunday
i know we can play with them
top prices have not been announced
he wo n't be the last
the news gave her hope
it 'll be another week before i see them
it 's a great day he said
the trial will be the second for both
it was a problem however
we have n't had many games like this
but there may be one
but we 've been very close
i told him i 'll be there she said
i should be used to it
we wanted to win also
the time also was a european record
i ca n't give a country name
officials refused to comment
you ca n't judge him on his first start
it said he could not be tried again
but i put in the work
we will have a good race
he also refused to name the bank
they have nothing to do with war
we thought it might
they do not want you
but he said there was no decision on this point
this must end it added
that 's the way he wants it
would we be able to win
police officials could not be reached immediately for comment on the report
he may already have
i 'm trying to keep them out
the spokesman declined further details
i really could he told the associated press
he was released two years later
a final ruling is expected later this month
and that 's all i have to say on it
i do n't believe in him as a leader
she did n't give up until the end
he declined to give details about the companies
she is from new york city
you do n't see a lot off the attack against this team
i like to play on this court she said
i had a lot of time
he would not name the company
they said several people were injured
but this is my right to fight for my life
it is to open next year
the u.s. military had no immediate comment on wednesday
that report was also denied by israel
this is one you want to win for the team
they found no weapons
but since then they have not lost
there are so many things we need
the government plans to appeal the decision
u.s. officials have denied that
from there the game was on
the council could not be reached for comment
it was just a game that had to be won
do i have a chance
the government says that is not the case
he planned to return to the capital to vote next week
the good thing is we know we can play with the best of them
i 'm not going to comment on that he said
i have n't thought about it
you do n't know what 's possible until you try it
so i hope they will do it
i think it 's the right decision
it had to win in the end
now this is my chance to really make it big
i thought he played a great game
the team is very good
the man was taken away by police
it was always so open
i know i can play defense
but it 's still part of the american way of life
he also said he would appeal the ruling
but he is in office
that is n't always a good thing
iraq says four soldiers were killed
it is only to help the party he said
they are the most important people in my life
the government shot back
no results were expected tuesday
court officials could not be reached late thursday for comment
no one was injured in these attacks
he wants to be the best he can be
we need to see it work
that 's all they want rose said
it 's not really important
a government official denied that there were any such plans
it has n't been that way
officials gave no further details
that 's the way they play
his condition is not known
authorities say the investigation is not over
the team said he was injured monday
there 's not that much change
the elections are expected to be close
it 's like my european home
we are here to help them
we are not finished
all three had been shot to death
i got to that point
but the most important game is in two days
i think he has more support on the committee
we need good people like you
it 's their right to do so
he was n't arrested
i want a chance to do other things
whether we can do that i think we can
you ca n't really point at any one thing
defense officials refused to give any other details
company officials held out little hope
the government would not comment on monday 's ruling
in that case she said she would press for early elections
he thought he was out
life was good to me
results were expected thursday
that 's what they do
that 's my goal and i 'm going to do it
right now they are n't
that will be an important part of my week
a decision had to be made
it was the one thing they got free
you should work on that
i had to force him to run his race
next year may be different
he added we 're going to put out a record
results are to be announced by saturday
the process would continue
another man was being led away by police
but the players have been great
prices are going up all the time
i know the prices are going up he said
i think it 's going to be the other people
this will be one of them
we 're close to the end of the process
he will do a great job
official results are expected to be made public in a week
we are french he said
he said more details would be released early sunday
we 're working with others
here is his report
you are our only hope
he gave no other details
it is the first time any nation has tried such a program
he was n't like that
but it appeared likely
the process has not been used in the united states
he declined to comment further on the meeting
i think it 's important that they do n't know
it had been a long time
it was just a great play he said
but this will only be for the month of may
it 's nothing new to us
it was the first european point of the day but it would n't be the last
the statement gave no details
the money is n't there he said
they were expected wednesday
i can not control them
i won the race he said
it 's over until next time
a defense ministry spokesman also declined to comment
it was part of my job
it still has that power
i 'll play she said
i did n't think about it
it 's very important new information she said
it 's the way i 've always played
he later left that team
officials gave no details
the others fell off
but i hope i do n't have to
more people have information on it
it 's not the way we wanted things to go
i told him to give it a shot
both of us played a good defense
the two men are expected to meet thursday
help us round up these people bush said
man united has n't had the best start to the season
but there are problems and it still has not been made
they do n't change nothing
they lost for just the second time in six games
he would like them to end the same way
more help was on the way
they could n't believe that
but will it be able to do that
that 's the president 's goal
no name has been announced
results are expected next week
i 'm going to do my best
they 'll have to get used to it
but it will take a while
still few would trade what they have
this ca n't be allowed he said
police did not give her name
it said it would likely continue next month
it was rejected earlier this month
a third man was arrested
bill does not think this would be an issue
it really got to them
i want to help you
now they had to call it off
we just need the three points
the agreement was announced tuesday but no details were given
his players believed him
nothing can keep him from it
she did not know who had been shot
this time could be different
but it is not over
but not all have left
i will always see it
that would price them out of the u.s. market
we want to do this
for some it is too late
that did n't take long
the companies also declined to release any details
now he wants to try again
we 're a team and we do things as a team
but by then it was already over for his team
their way is to go on fighting
this was the most important match for us
but this is a good start
the u.s. defense department had no immediate comment
this is an important system
there 's the japanese issue
but first came wednesday 's game
no such visit has been announced
he has n't been allowed to return
but he refused to give his name
he 's one of the best players in the world
a decision was expected next month
he did n't have to be there
the report gave no other details
he has a trial scheduled next month
that decision has not yet been made he said
and there are other problems
and she 's got the power
it 's time for a clear out
it was really a support system
defense took over from there
they wanted it to be found
which is a good thing
that 's great he said
that 's not the way you do business
two others were charged friday
i have to do it again she says
but right now it 's just a game
two other local men tried to help
and that 's what they got
it is too important
i know what i think
the report did not give other details
authorities could not be reached for comment
the fight is not over
they were really good
the army did not return fire
election officials said no further results would be announced until wednesday
it 's not going to be next year
we did a good job of it
the statement did not give further details but said the case was under investigation
and i think it 's possible in the future
the government had no comment on those reports
and that 's the end of us
the third round was played sunday
it 's a good start for me
details were made known monday
we are n't a part of china
you 've got to work and you 've got to work and you 've got to work
the team will be announced later
each state is different
he however did not give details
there was some action
the situation can not continue
it will help me at the end of the season
you ca n't control things like that
it is a very big office
the talks are to continue wednesday
i really have nothing to say
it 's possible he said
he is going to get a second chance
we already know who 's going to win
now we have a part of him she said
without their support i do n't see any chance
no one can take that away from us
i just want you to know that
there was no immediate comment by the army
i 'm trying to win an election
and i think you can do good business
you 're in a match
and there 's still a long way to go
he did not do any work
he wants to help people
that 's all i 'm fighting
they had no details on the two killed
i 'm going to do that
or said she had no other details
this is a big business now
i just have to do this
japan finished with seven
i want to play the french open
i just wanted to win she said
parliament is expected to vote on the issue next week
we just did n't do it
we 've got to get the troops out he told campaign workers
the opposition called for new elections
there were n't any problems
and he did n't stop there
police denied the reports
police made no immediate comment
not under this director
he has been a big help to me
results are expected to be announced
it 's never come up
the process is expected to take several years
we wanted to go out strong
he was released after three months
i will win the fight
i do n't believe he did this
this is the life i want for my children
to me that 's not the issue
you have to play defense if you want to play he said
i thought it was a good goal
he said six soldiers were injured
they were arrested over the past week
i just want to know what 's going on
made said the government would continue its program despite the court 's ruling
but he did n't get it
israeli opposition leaders agreed
but they could never take the lead again
you ca n't he said
there was no immediate palestinian comment
that 's different he says
one man was injured in the attack
i want to be clear on one thing he said
i did n't want to give up
he was set free last tuesday
she refused to give any further details
but it 's their decision
that has been our game
you do n't work for the president
the leaders are expected to issue a united statement about israel
i want to run this country without violence
and it 's always been like that
that was never a problem
three people were arrested
it 's time for a change
but the defense ministry denied that report
she declined to name them
the third did n't work out
police officials would not comment
he was not arrested she said
when you get a chance you just have to make the most of it
they just want them to stop
he declined to give a number
for me that has never been an issue
we can plan for the future
his family asked the hospital not to release further details
an israeli spokesman said it would
i want to help the team out
there 's nothing i can do he said
the price was n't announced
but business is very good
but she ca n't take time off during the week
police believed he had four weapons
we need you in this house
but there were new reports of violence
now he 's about to try again
i ca n't give you his name because i have children and a family he told the court
they did n't take weapons
he did not immediately return a call seeking comment
police said several people were killed
it has nothing to do with the government of israel
the united nations had no immediate comment
they 've lost three of their past four games
that may never be known
the visit was planned he said
the decision had been expected
she was shot in the head
then there is the economy
there was no other way
it was a strong one
we ca n't visit them all
but he was n't charged for that
the company plans to release its results next thursday
we 'll work it out he said
but they may now be too late
he refused to name them
he has n't lost since may 10
i would like to win here he said
the ministry refused to give out any details
now it is too late to go back
i wanted to win the race
there was no last year
it was time he said
this is the will of the people
the u.s. open is the u.s. open
he refused to believe this
he said he thought he would be killed
we will now get on with it
they want to do it again
still there is some hope
the best is when i win
i like them he said
it has to be there
but we ca n't give up
he 's the one who has problems
i do n't like that
the report could not be confirmed by u.s. officials
he was later taken to hospital
we just want them out of here
it could have been different
it was important to keep him
they just do n't want to deal with it she said
they have to help those people
we are like a family
they really were my world
he might get a chance early
i think that she is the best
there are two things you can do he said
but you can do too good a job
the trial is expected to last four months
he 's not the only one
he played a really good game
that 's all i have to say now
his election was expected
she came out of no place
it could not be immediately confirmed
no other nation is even close
we are the national army he said
the men told her they were security officials
the trial is scheduled to continue through friday
we just fell into it
france has won its five games
he was seeking his second victory in japan
the government will go
he might be the only one
like most officials he refused to give his name
now i know he said
that 's very important to us
there is a chance for peace
i want to win here
we are not going to continue to do that
the opposition is different now
the united states has not
what 's the big deal
it 's going to be a good match
there are several countries he said
and that 's the best thing we can do
that 's the way it 's been all season
the house was not set on fire
but china may not do that
it 's always been a part of my life
but they will get it
he was released wednesday
an appeal is expected
the results were not immediate
i have three children
it 's what i need now
we did and i got the money
i did n't believe i could win this race she said
a win close to my home
the north has a long way to go
hope we do it here
officials did not release his name
it should be like that
the group gave no details
the important thing is that the decision will be taken this week
so this might be his final year
six other soldiers were injured
you 've got to deal with it
i will not vote he said
no problems were reported
it 's going to be a long day
the charges were announced thursday
news reports said he left a week ago
then there are the others
but they did n't work out
they ca n't help it
i want to continue to play
i do n't think about money
it will take more time
his name was n't released
and that is also part of the problem
they had no more details this week
it will be a big day he said
a final ruling is expected early next year
both declined to give details
he was arrested immediately
i think he will win
i did n't know what it was
i 'm going to go to it and i 'll get there
but i have to keep working for the u.s. open
it is not likely he said
nothing is clear she said
still it was a close call
for him this is home
there 's no problem as long as i keep working
i just want to win
he should not get it
we have reached very good results he said
u.s. soldiers also killed
it 's really in their court he said
they did not give details about his condition
that may not be likely
i want them to be clear
a u.s. military spokesman had no immediate details
they 're on top of their game right now
i did n't like that at all
and we did n't win
this is not the most important issue he said
france will not do that
he said we 'll change him
the record wo n't keep me here
it 's a major problem
my game is very close he said
you do n't even try
there has been no fighting since
it 's our business
this may have been going on some time he said
this should n't be a political issue
this is about more than money
the man had yet to be charged
a decision is expected next year
i asked her if she wanted help
i know there 's a need for this
no decision was made friday
i do n't have any of that
one died and four were injured
that 's what 's important
and i think that 's a good thing
the situation is now under control
she refused to give any details
no decision has been made he said
the agency can appeal
he could n't name one thing
the report was confirmed by the foreign ministry
no further appeal is possible
an investigation was planned
i ca n't run on it
he did not have details
the investigation is going on he said
washington has won four of five games
she died four days later
my job is not to get hit with the big shot
he gave no economic details
i think we do our share
it was n't just the press
this is n't one of them
i made it to another day
right now it 's important because i 'm able to play another match he said
israeli army officials did not immediately comment
it has always been this way and will never change
those reports could n't be immediately confirmed
the injured were taken to a hospital
you have to keep going
our work is not over he said
we 're one of the best
he did not give the number of those killed
and it was not the right thing to do
he has to be strong
if they think like that they wo n't last long
we should work to end the violence
there 's no control he said
he has refused to do so
we too support this appeal
we do not have any information
the soldiers were arrested on the same day as the attack
i 've got to get going
he did n't want to take the chance
they too have left
at the same time there are new problems
he was quoted as saying
he said he expected the group to meet again
he 's expected to play saturday at washington
things will change
we 'll deal with it
still the company is not without problems
this is the second or third round
the situation would have been the same
it has been closed since may
he has seven children
we want to win four
and he lost the election
only committee members have the right to run for president
israeli officials said
administration officials said they had no further information
if we do n't have it we wo n't have peace
officials did not comment on the talks
he 'll work those things out
we did n't believe it but you did it
i thought this was my last year
if the people do not vote for me i will back out
he never appeared to get down
that 's too high she said
it did n't start out this way
we just got to try to do it again next year
it was a big win for us
three people are killed
i 'm going to win this
i 'm going to face it head on
one died during the trial
i did n't think he would try again
this is what we do
court officials declined to comment on the ruling
you do n't have to fire a shot
she would n't give more details
i did n't have any problems after that
i did n't want to play no six games
she did n't get out of that one
if it is not we have to fight it
i 'll get him there
i think he can help our team
the report could not be confirmed
i can see that now
we need each other
first results were expected late sunday
that was last week
all must be tried out
they do n't do it for the money
there 's a lot going on here
the judge is not expected to make a decision for some time
i do n't think it will be over he said
this is my first one
and he might be good again
but they 've got to work that out
we wo n't be played in this political game
i want just the victory she said
they did n't believe me
the second is on wednesday
it too gave no details
last year they had six
but she added this is my home
it will come again
the bush administration was not united however
it 's important that we help he said
we know this is the last chance
there are two more games to go
i said i do n't want to know
it 's a meeting place he says
the family declined to comment on the press reports
i do n't know what it is
the women were released without being charged
police said he appeared to be in good condition
that was as close as she got
if we can get more work we can get more people
u.n. officials did not release any information
there is no change in that
that 's the good news he said
they too did n't say much
the business closed for a year
and it 's good to be back
but the officials are n't ruling it out
they 're a great team
one thing led to another
that was a major issue all year
it 's not against israel he said
we did n't want to give them life
they are a great team
he died in a hospital friday
this is their plan
we were fighting for our season
today i know it was n't by chance
it 's a very good market
this is just a new way to try it
it was no stop action
we just have to come back strong next game
this was his first game against his former team
it 's different here
i should not have made this comment he said
u.s. officials have said such nations include north korea and iraq
that 's my first goal of the year
they get what 's left over
but we can only do what is possible
european officials could n't immediately be reached
that 's not his job
it just was n't our day today
she was expected to be released sunday
he had no further comment
they planned to start wednesday
they are scheduled to return wednesday
no one has been injured
they 're still there
he would n't give any details
new york won for the second time in seven games
he said the north appeared to be trying to become a second china
that would come later
i really want to play again
he has agreed to return the money
it does n't have to be this way
he would n't give any other details
they would n't name the countries
elections will come
it 's time to go to the future
i think it 's going to be a great game
that 's the way you have to do it
the officials agreed
you really need help
then came the shot of the day
she planned a press conference friday
he did not give any details about those charges
she died two years later
they were believed to be working out the details of the nuclear deal
we think it 's a time to make a deal he said
police gave no details
each one of these people is the most important thing
and that may be his problem
it 's not a major problem she said
he said there had been no reports of political violence
we have some very very good players
and we want to help
he could not be reached for comment thursday
we need to be able to do the same thing
the rebels could not be immediately reached for comment
but i thought it was good
the results are clear
some never have been charged
government officials did not immediately comment on the report
it should be great
it was one of those days
it will be a little change
we will just have to see he said
he never wanted to change it
no violence was reported immediately
there was n't much time to play he said
we have had a very good meeting he told reporters
he should not be there
that does n't help it
did i say all that
he said the men would appeal
it 's been so long
he did not have the right to do that
court officials would not comment on the reports
no one had been arrested monday
the government accused the rebels
the three have not been charged
they were reported to be in good condition
however more help was on the way
authorities could not immediately be reached for comment
washington already is the capital of the united states
i can not even see you
her name was not released tuesday
we wo n't know until after the election
there have been no attacks since then
the court said the investigation will continue next week
his was the first reported death from the team
but no i do n't work out
that 's not the only place she wo n't go
he said such a decision can not be taken immediately
france has a good team
it could open later this year
i have n't been there in three months
we 'll have our day
i just hope it will take me she says
he 's become a strong leader
the russian foreign ministry declined to comment immediately on the report
if he 's allowed to come here that 's great
no one took her up on it
defense officials could not immediately be reached for comment on the reports
it 's not right he said
they wo n't do it he said
we just hope it 's not too late
that 's also led to a lot of close games
court officials also refused to comment
i 'm just another man
but we do very much hope for political will
in general his condition is good
they were expected to be released later during wednesday
authorities have not said who made the call
i can always make that shot
you should know you 've tried
police could not immediately be reached
two were believed to be shot to death
you go and have a good life
it is a way of life
i ca n't see the future
the rebels were released
it did not give details of those attacks
it took on a life of its own he said
those results are expected later this week
there was no immediate information about her plans
this is clear he said
u.s. officials refused
there will be a vote
the results from the police investigation are scheduled to be released monday
then it called for help
police said the fire may have injured several others
all went to south korea
i think he made the right decision
this case is important too
administration officials said no decision had been made
there 's little chance of that
it 's over she said
he did not name the other nations
i was not going to move she said
i just do n't believe that
the process could take several months
police arrested him several days later
i wanted to do things my way
the foreign office denied this
the official did not give details of the group
but at the same time we came here to win two games and we 've only won one
she put her life into the job
he has not announced his future plans
bank officials could not be immediately reached for comment
they do n't have time for that
it 's going to be a war he said
she was trying to become the first to win
many were not expected to return
it 's against the law
the defense minister refused to comment further on the case
i would like to take that chance
this can not go on he said
the talks could take days
but what 's the news
and i think we will
they play off each other
you help them get what they need she said
japanese police officials declined to comment as did the u.s. military
they never appeared
but they have a point
for those who have n't been this may be their chance
we believe we 're going to get a lot of his support he said
people always say there are too many games he said
that is the way it is
right now it 's a white one
it 's good news that is going to continue
but this is not a public issue
but no immediate action was taken by the party
what 's the end problem
they do what they want
you should have all the information you need
that would be the case
bush has not been back
he said military officials would not comment on the case
and now is the time to say it
now we have more time to do that
what palestinian state
i just wanted to get off to a good start he said
it 's their own problem
i really thought i had a shot he said
the government would not comment on the case
there was no immediate comment from the three players
council members would include the top leaders of both countries
there has been no fighting since then
the israeli army declined to comment
he said that came just before the first game
this one was never close
now it will be france
you can win if you go to the court and believe it she said
no one was injured in those attacks
company officials declined further comment
i had a good day today he said
i think we gave it to them
the judge did not immediately issue a ruling
results of the vote are expected late wednesday
we 're working on it he said
i think that 's great
its ruling was released late thursday
we 're going to be back
he will return to new york on wednesday
i got the best part of the deal
we have got to give them problems
it 's nothing against her
they did not know they could appeal to the state
they do n't believe in it at all
if we play with that we can win
i have n't lost a set she said
i did n't even try to see it
military officials denied there was any violence in the area
i was just part of the group
the company has refused to release it
i know he is on the run
he did not say what charges they might face
we want to see peace
they are expected to last three days
coach already has a plan
the committee will meet wednesday
we wo n't put up with this he said
the minister did not say whether he would appeal
the israeli army declined official comment on time 's report
he was the first to be tried
there 's so many good players he said
we just do n't know he said
he said i do n't believe in what you believe
the play is the thing
his trial began monday and is expected to last through friday
but i 'll have him in the house
u.s. officials refused to comment on the meeting
it could be held next week
the men were arrested late thursday
we have a job to do in iraq and we want to do our job right
no vote was expected before wednesday
today was no different
and that was only round one
i told them i would do it
that ruling also is expected this week
but right now that 's our plan
i always think about it he said
it just came early
the house was set on fire
so it 's good to get through
he said he would appeal the decision
but that 's not the point
this time may be different
two others died wednesday
it was a good time to win
people expected it
the situation is not good
we did n't want them to get into it
he could not immediately be reached for comment on the report
that will likely end
i had a press conference with my head he said
do we have the will
police and other officials declined to comment
a ruling could take months
the house will vote on the issue next week
for the most part they did n't
no one is against him
i could n't deal with it he said
no other details have been released
but it was a good start
they are different yet they are the same
no one wanted this war he said
i could n't see a thing she said
no one would do that
all the rebels were killed
but you can be close for a long time
u.s. officials gave no details of the meeting
it should n't be a problem
that 's all i can do
we 're a team he said
i hope she does n't
i did n't play at all
he made a great play
for us this is the most important thing he said
a decision is expected friday
such work is not new to some of them
he 's not going to get any of that
a u.s. military official said he was not able to immediately comment on the report
they need a lot of help
the military gave no details of the attack
i wanted to see them she said later
you 've got to play good
we have our own plan
it has nothing to do with race
i should have finished it earlier
i wanted to try it right away he said
the u.n. security council is likely to vote on it later this week
they should n't have to do that
but i know there will not be an agreement today
i always thought that i must see you again
i do n't even want to get into it he said
those weapons were never found
we want to do what 's right for this country
the move is expected to take 10 days
we just could n't stop them
i still want to continue to play
this is one of those things
the case is closed
we 're very close he said
they did n't stop it he says
but he said that would n't stop him
we want to change that
they do n't want to face it
i do n't need to do that
that will take place before the end of the year
but she said there 's a long way to go
the situation now is different
the family has given up hope
he 's always been a big man
he did a lot before
i ca n't control what he does
today some would say it does
they had no chance to show off their power
it should n't have but it did
it 's the other work
it 's very different he said
he 's working away she said
nothing was immediately found
would they would fight for their country
elections are expected later this year
we already know that
he could go for another record
he said he did n't have details of the meeting
one is free to make one 's own decision
we want to keep her there with us he said
no final action has been taken
but that was as close as they got
he did n't hit it out
we only run because we like it
what 's going to make me different
be like a man he said
most are women or children
you just have to go
there 's going to be no time to make up for it after election day
we 're not trying to win four games
it is a big business
but last month he announced he would run again
there 's a long way to go
it was the first scheduled match of the day
i think there will be few new injured people he said
he 's a part of this family
he said the city should be given a chance to do so
i just want to be free
he declined the deal
the report was denied by the foreign ministry
foreign ministry officials refused to immediately comment on the reports
but there is little hope for an agreement
a spokesman said they still have to press charges
that 's not the way i play
he 's the same she said
it is very important to us
they agreed not to show it and they wo n't be there again
no help came immediately
it 's a lot of money
i would like to know who killed him washington said
three other men have been arrested
free press is a must
they want to see us win
he was released monday
and do n't try to be one
we 'll do it this year
that would be too close she said
they take them because they work he said
the family was told last week that the trial would be on wednesday
it just does n't he said
that 's what the country wanted
the judge did the right thing he said
it was n't over money
bush administration officials say no decision has been made on whether to attack iraq
officials could not immediately be reached for comment on the report
this is a home run
we still hope for the best
both could last until tuesday
women did not vote
i think the world can use all the help it can get he said
general elections are wednesday
and we 're going to try to get one next year
but few appeared to believe him
police officials confirmed the fire but declined to comment further
we must believe we can do it
it 's chance he said
you 've got to go play
the reports also found that
he was one of those people
it should be the other way round
now it 's lost city
he died last thursday
i want you to know that
the u.s. official said
two people were injured
that decision was taken tuesday
i 'm working on it now
i ca n't say we 've agreed he said
i think it is going to be a good fight
but that began to change this year
the team left sunday
he has not agreed to take the job yet
but he confirmed the union would press for elections
she would not give further details
she told them that she does n't have any money
he did n't know who shot him
we 've got a good team and we never give up
i did fight her in one show
it will not be a problem
now it 's decision time
it would not give further details
the government denied it
i had to play my best
both have refused to comment
u.s. officials said
police did not give details of the charges
it 's going to be going back
but other countries did not support the move
a ruling is not expected until next week
that 's the business
now 's not the time to change
i have lost all my family
i do n't get to see my family
i said that 's got to go
no one was injured in the late monday attack
and there were others of them that did that
it 's their law bush said
it should be expected
an election campaign is one thing he said
now they may have one
i do n't think that is now possible he said
court officials could not be reached for details on the case
i know i have a chance and i 'll be going for it
it 's not a political thing
she never came back
the agreement was announced wednesday
any team can win against them
that should change
never was and do n't plan to be
city officials have declined to comment on those reports
they will then go to the parliament
no agreement was reached
the process could take more than two months
the lead is now three games
no new time was immediately set
their trial is still under way
and it could be his best
i try not to think of that
when they hit each other they get more money he said
the deal could make one
the military gave no other details of the death
the united nations also has called for international help
i would like to be one day
of the four only russia has won the cup
but i had control of the race
two later died at the hospital
i think that 's the best i can say
i just ca n't do it
that is not the issue
they only took it off four days before my release
they gave the control to the united states
it was my first job
i 'm not late he said
she also refused to give her name
there was no immediate comment from the peace force
people like to try new things
who 's going to stop in this
most have never killed before
i 'm going to keep trying to get there
this was different
we played as a team and we have won it as one
they may just not be up to it
it was an important first day he said
this could end the trial
i do n't like second place
go against them and you 'll be shot
but this is a business
the time has come he said
israel 's defense department declined comment
they do n't think about defense
the opposition has said the fight 's not over
i went to the public hospital
but it 's important to have people you know
this is a good bill
but we came out on top and i 'll take the win
both those games are saturday
we will not attack to force them out he said
the case is still under trial
police released no details
the deal is scheduled to be closed by the end of may
but he said it would not keep him out of saturday 's final
two other family members were also arrested
five people were arrested
so what 's the use of going on
it just was n't right
price is the first problem
it was a close race
company officials could n't immediately be reached for comment
elections are scheduled for next year
he later went back into the game
nothing we could do that day he said
we want him to come back he said
the trial began in may
there is no fight he said
she did n't give her name
this season has been different
it 's going to take a while to work out
do you see security
no one has been found since wednesday
a news conference was set for saturday
i think it will be a great great fight
that appeared to be a major victory for the u.s. and israel
just about all reports said this
the situation is under control
you just do n't do that
it 'll never be the same
so what 's the point
but they may be too late
final results were expected early thursday
so it was a great match
it 's a family business
good deal she said
and that is the problem
but what is the place of french women
he did n't report any problems
they should give them to us
police did not try to stop them
i do n't think it will
we will continue the investigation
the decision appeared to have been made late last week
but is it always the same
the people want change she said
people still want to see it
clinton wo n't go to north korea
he was among several people injured
both are away games
we played a good game
i 'm not going to comment
we believe that they will support the peace process
the committee has asked
the government denied the reports
he 's just too good
they were arrested last week
we 're not a big nation
most were shot in the head
they have won six of their last seven games
they should n't do us that way
we do n't think we did
i just hope to play a good match
she did all the right things
official results were not expected before tuesday
he did not return a call seeking more comment
i could n't run he said
it should be no problem
we did n't get into all of that
the officials said the soldiers were allowed to take their weapons with them
we do n't want to use him too early
but that could take time
some however also came from iraq
he did not say whether any action would be taken
that 's not very good
it is closed he said
police would not comment
we could have very good results he added
this can not be allowed he said
she just has n't had time to deal with this
we do as we 're told you know
close down the city
we have most of that
i know he 'll do it
i do n't want to name those countries he said
still he did n't think he would win thursday 's race
it 's a close game
she did n't have to be there
and they did the same thing
several countries may be added
fire officials said
the talks are likely to last until the end of the month
it 's time to do my job
but we did n't do that
they were an important part of my life
most are from the united states
a decision is expected this week
that was a big play
the game is different
but the union said it would not back down
there 's a good chance to win right now he said
if they are not released what is the plan
it was the best part of my life
the president 's office refused to comment
there was no immediate comment from the british government
but i can get it right back
you just have to keep working
this is part of it
he 's got to get out of it
there is also the issue of north korea 's nuclear program
five others also were killed during the attacks
but she could n't do both
the government did not release details of the talks
we need to do that
but now it 's a great call
i hope to be back he said
but it 's not that big a deal
you really ca n't win
he declined to comment further on his name change
it 's the third time a decision has been put off
he had been on the job only a week
you got to be there
i would n't put it past them
it was n't known if the u.s. government would appeal monday 's decision
you are never finished
i think it 's clear
the show is going strong
it was expected to issue a report on friday
i did n't want that
we told them they are not allowed to work there
company officials could n't be reached for comment thursday
that 's the name of the game
he will be charged friday
it was over after that
it does n't end here he said
this will be their first election
and it wo n't change
you do n't get me out
those reports could not immediately be confirmed
i just took off on the back
there was a problem however
he did not immediately release further details
i would like to know what 's going on he said
that 's part of it
military officials did not immediately comment on the attack
he was too good today
but before the season is over i 'll have my day
i hope i 'll be able to go home he said
we can not give up
it 's not right price said
the new program was expected to start next year
this is good news for the american people today
we know that we have to control him
then again they may not
you 're not going to have a chance to win
we are going to make it to the final four
but it will be a while until he really is
there wo n't be elections
i told him i thought i could really help him
she 's not going to give this to me at all
the defense said it will appeal
they had no further details on his condition
he is expected there on sunday
people were trying to get them down and get it out
he 's a big part of it
we have to try to take it back
a government official declined to comment on the report
he could not be reached for comment on wednesday
he does this round
there will be an appeal
she was one of four children who died
she has no children of her own
no foreign reporters were allowed to visit the north
i 've got a long way to go
but we ca n't do that here
that 's not the fight
they have nothing to do with this
she was just too good today
it 's over the top
our country is strong
i was very close he said
this will be a very good visit he said
two people were injured and four were arrested
i just told them to take their time he said
this is the decision i made
they are france china and russia
we believe there are more
some came away with nothing
but it 's not home
the day is not over
the official who refused to give his name gave no details
the army major was injured
he had no further information
it declined further comment
these people are never going to give you a chance
the city will work as it should
both went against him
the opposition has nothing to do with this he said
there were no immediate reports of violence
he was a team leader
officials denied it all
it 's very important to help those players that are injured
i just did n't win and that 's part of the game
we ca n't change it
did she think peace was possible
she was able to do both
i ca n't get any information she said
you can take that one to the bank
this is a big part of my life
the results are not expected until next week
we have information
but there was no one to stop them
it does not work for men
there was no economy here
but that was as good as it got
they 're not meeting for the first time
france is my country
officials said it could take up to two years
this is my one time
if you do n't you wo n't
they just did n't want to meet with him he said
there were no details about money
i think it is very close to being finished
it 's the russian way
but nothing is over
he said they will comment next week
they were set to meet again tuesday
we hope it is no big problem he said
but he is not at his best
the parliament is now led by a former opposition leader
this is the time we set up for
they may not need it
now i 'll try again
they refused to make any comment
however no violence has been reported since
we really wanted to win this game
i never thought they 'll release us he said
it has been just great
other officials refused comment
he was arrested for fighting
it 's not all work
and that 's not likely
several people were reported killed
it was his second world cup win of the season
you do n't have to
no name was released
he just wo n't like it
the government was expected to appeal monday 's ruling
the election was open only to party members
they have children
the players want to play
she did not give details of the meeting
the white house said the report would not be released
if they want peace we will give them peace
we are trying to win the game
law declined to comment
another is to call early elections
the army did n't immediately comment
but they also believe that move could be the last one
the defense said it would appeal the ruling
they declined any comment
now he is the president
if i 'm able i want to be like her she said
these results were expected he said
results are expected later this year
we will never give in
that vote is scheduled monday
they are expected to include three women
he did not give details of the plan
there was no immediate comment from the north
the others already have been released
now that we are first we think we can win
results were announced after the market closed
these are people who really do good things
we have much support
he said he will not appeal
seven months later a deal was reached
new york was her next stop
he could not say whether the call was made
the third man was not injured
there will not be peace
they did not release the man 's name
i 've been working on this today
you do n't know me
i 've never wanted to get a job
we need to play more games
they both were men
the only thing he can do is change the game
we could have a party
results were expected to take several days
final results are to be released by next week
it 's not a big deal now
this wo n't be a big deal
we do n't have that here
the process must continue
you 've got to work with them
the ruling appeared to have the force of law
we would hope that this is not the last
no one will be able to stop it
an official investigation was under way
she died a year ago
you believe me right
it 's still going to take a little time
we never agreed on a deal he said
i have no problem with the record
he has refused to meet with reporters
he was the only one arrested
we still do n't know
i did n't think i would get there
i have a part of him
he 's the future of our nation
it does n't just say we do n't like you
i told them i will and i will he said
some things never change however
he is expected to be among the first people tried
police would not comment on this
he should have been tried long ago
it was just a great game
no case has made it to trial
it was more of a life decision
but there is one big problem
there was no immediate comment from israel on the fighting
he is the man of the future
there were no reports of
white declined comment
but it was different when she went before the public
we will have some problems
i have taken two in a year
it 's too early to say she said
i think it 's great he said
now we 're going to fight for his release
a decision was expected monday
he did the right thing
but i was not injured
i do n't know what 's going on he said
but this could not be confirmed
that 's what it is
he said they will appeal the ruling
this may have been the end
he died while being taken to the hospital
that has been lost
this was a great game
he did things because he thought the were right
i would like to know what was going on
it 's always been that way she said
we will have security
u.s. officials had no immediate comment
that 's what really killed us
many members of the police force were former military people
the man was released several years ago
stop this violence
i would do the same he said
i believe we can do great things he said
they might need the money
we want to have a deal
no talks were planned
that 's the way we want it to be
it is not our business
that 's what i need
we did n't start the fight
we have too many problems of our own
it did not give his name
but i did n't know the game
but things are now under control
he did not say who they were
that 's one way to put it
we have to say this
but you do n't have to think the same
no other state had more than three
i just did n't know who he was
we should be in it
we 've never had problems like this he said
that 's what good things do
police had no comment on the report
but i could n't help it
i like the victory
and he did n't have to do this
we have nothing to do with these people he said
there must be some other way she said
we 've made it clear he said
that case is still under way
the process is expected to take several days
they can not continue he said
now we must win it
he could run for election at that time
that is not what he found
they do not want peace
they have problems
the foreign office also refused to comment
the company declined immediate comment
she 'll need the money
it took me a week to get over that she said
another judge allowed him to return
but he will do his own thing
you just put up with these things
i 'm going to get that one
however talks will continue on the issue
we want to win the league
i was just a man with a problem
we are not nations
they must help us now
this is my first time
police released no other details about the attack
officials said they would release details later in the day
it 's a good change
she really was n't into it
it has been a very long few months she said
now they are fighting back
it now has little public support
this is just the first day
i wanted it to end but i did n't want it to end
he 's not going to get it
he also said the attacks would continue
but that was not a problem
this is just another part of the business
but it is now clear that she is not
he did n't even want to fight
we know they are going to attack us on this
the official declined to give details
but he 's expected to work out thursday
the u.s. military was asked for comment
we know what that is
you ca n't run away
but he said we think we know some of them
all are from the area
that 's part of life she said
it 's great to have her going against me
so i 'm going to take that on
three committee members did not vote
the fight is important he told reporters
it 's the most important thing
the reports will be released tuesday
he denied all charges against him
i think that 's the way to go
there 's got to be a way
he refused to make any comment
it 's just too early
that was then and this is now
israel 's army refused to comment
we do n't clear them with china
he did win the next two points but would n't get another
talks are scheduled to continue this week
right now there is nothing
and it was n't the first time
five people were injured
we want to win this game he said
the government has declined to comment on the case
and i have it and i will do it
they took it with them
this is just the first round
he said you 'll see
the men have denied the charges
the soldiers agreed
now there wo n't be one
it is n't and it was n't he said
the companies plan to appeal
after the victory he said it would be his last fight
many might not come back
but help is on the way
she 's seen it before
others say it wo n't be the same
and that 's just this year
russian officials declined comment
no agreement has been reached on such a committee
they have great players
it was released late thursday
i 'm going to see him right now
we got him out of here
but i should have scored two
he was n't the only one who had problems
it wo n't help me win my next start
we had nothing during the war he said
we have to go for goal
there is no plan for clinton
police officials had no immediate comment
but that 's north korea
i 've always been the same way he said
a new time was not set
further details were to be announced wednesday
he was later released from hospital
the decision was taken monday
the report was released monday
he did not return a call for comment
the major league record is seven
the election is tuesday
the u.s. state department also had no immediate comment
we will try our best
i 'm trying to win
she had been shot in the head
so we are going to have to start at the back
there is so much time to think
the players could not immediately be reached for comment
give us the information and we 'll keep these people out
he did n't know his name
we want to be part of the world
this must not continue
it was a long week
he did things because he thought they were right
but he is n't the only one
he tried a few things
our work will go on
he did n't wednesday
will it work in people
who is going after you
it should n't have
you are a good man
he declined further comment this week
it 'll never really work but they 'll keep trying
i 've never been that way
they ca n't change
and yet all is not lost
there 's going to be a lot of close games and we 're going to have to get used to it
most were soldiers
they will meet for the first time since then
but that would not likely be the case
they said you have to go back
we hope nothing will change for us he said
they should be more open
two were killed and two were injured
i just ca n't keep up
if they are we will
i think it was the right thing
it was not clear whether there were women or children among those killed
it was a great start
there is not a chance that there 's going to be a deal he said
we have to stop it
he wants to play all the time
he died earlier this year
final results were n't expected until monday
but now i do n't know
i just like the power of it
official results were n't expected until wednesday
it appeared to be working
but it wo n't be our last
it is not a good situation
but he did not show up at the conference
the information could not be confirmed
i think we got it made she said
some will be taken over
i know nothing about him
it refused to comment further
many said they would not return to the country
i believe it can be
he called for their immediate release of the two men
national conference
but it wo n't be this year
things may be different now
i should have won he said
or you can take action right away
the next game is sunday
i just do n't believe it
they thought about it
the military declined comment
but i have n't given up hope
he 's got to hit it
they were always great
he is the president
he said he used most of the money to help run his ruling party
that meeting took place last month
i could n't move a thing
officials declined further comment
it 's just been great
during the season they had the lead
four years later he led the public administration ministry
but there 's a problem with washington
we do not make the news
the u.s. state department refused to comment
he did n't like what he found
the fighting must stop now he said
there were no immediate reports of injured people
he made no final statement
they gave no other details
they will go for it he said
i do n't think it will be too long
we 're working on it now he said
ministry officials refused to comment saturday
it got some money but says it will only last four months
the race is saturday
at the same time he said clinton did a good job
officials have refused comment on the report
it 's not like i killed the president he said
i really got to go
it is not known whether the trial was open to the public
the trial is expected to last six months
but it 's a race against time
the home office refused to comment on the case
i wanted to make her move
you did n't say it
she did not immediately comment
that 's a decision that still has to be made
that 's not the way i do business
the general could not be reached for comment on thursday
it should be a good week
it was not the thing to do
that was my goal before the end of the year
each had been shot in the head
seven others also have been arrested
but he can do that next week
we only lost one game
there was also no immediate comment from israeli or british authorities
i know i was n't there he added
it did not set off a fire
the details will be played out in the next few days he said
she wo n't be the last
this can never be taken away
the company said it will release details later
but he would not give any details
others take their place
he also said the talks would continue saturday
if it did n't work out we could take a chance
local authorities have refused to release any details
that was until the race
i say you should n't
it was the only decision to take
there will be early elections
so what 's going on
no decision is expected until next year
but it 's over for him this year
he has denied all the charges against him
the security company refused to comment
company officials could not immediately be reached to comment
we do n't know his name
she 's never going to give up
the israeli was arrested
now we have reached the point of decision he said
the vote is scheduled for thursday
it 's the war that does n't end
she was not injured
i did not work for my government or another government she said
they said however that a comment might be made later
the hospital had no comment
there 's no way to know
however no violence was reported
i just ca n't believe it
i wo n't believe it until i see him he said
it did n't make money until last year
you do n't get that one
that has to change
the talks include the united states north korea south korea china japan and russia
now they know he is
i hope things work out
we will fight our government in a court of law he said
it 's not clear whether he was released
it might just work
until now all were white
and they did n't go for that
no really they are
however it has not been used
i hope he wo n't do that president clinton told reporters
a vote was expected friday
he said it would be his last
the president does n't like it
he has been held since last year
that was not an issue
in washington the u.s. state department said it would have no immediate comment
that case is still under investigation
but we have n't won yet
it 's a little thing but it 's a thing
there was no violence reported friday
i really do n't have any comment she said
that 's good company
there is always hope
i think about other things
but they 'll never see that
we do n't say this
team officials said they may appeal the ruling
he is to return to washington on saturday
it was n't the best time
it did not say whether it would take further action
this information can not be released a court spokesman said
but i do the right thing too
the race is scheduled for sunday
so we 'll work on that
vote for the opposition
the trial is expected to last through friday
we 're a different team
you ca n't control the future
it was taken from us
it might not end there
i just had to do it
you have to play point after point
the government denied any such plan
and that is the state party
i just hope they 're right he said
but i 'm going to play for free
the state department had no immediate comment on the change in plans
she ca n't say that
but he told me i was great
he gave no details but said there were no other problems
you ca n't go to five
washington rejected the charges
if it would really work i would
the british open is his first major of the year
this is the problem
it was the first death reported in the new year
i would n't put it past him
he went on about his business
to them it 's their job
the government has n't released any other details of the deal
and there were others
it 's going to take time
i did n't want to do that
the company denied that a decision had been reached
many did not return
this will be our victory
i really want to play with it
officials would not give details wednesday
i do n't know who he is
he has said he will not run for the president again
all iraq is open to them
that 's a different thing he said
what is the use of the united nations
we never got to that point
there was no immediate official comment on the report
she just had to do it
this team is a good team
it 's the only way to take it
he gave no other information
but if he is arrested he would n't call us
i do n't think there 'll be a problem he said
we have n't been able to do that
it 's like she won the race
family members could not immediately be reached
then it 's too late
people said they would like to see me run
seven others were injured in the attack
a party spokesman said he would have no comment on thursday 's ruling
that may not be the case now
we had many injured players
again it has to do with a fight
it is going to take time
if they want to make a deal they will
but now is different
all four said they would appeal
it has become the election that would n't end
she 's won before and she will win again
i do n't think this will be the case he said
the united states says it has no such plans
she died later in the hospital
i want to have a good time
state election officials said they had no information on the violence
so they should think about that
we will meet again
they are going to need all the support we can give them he said
she would give no other details
there is no peace for free he added
should they have come with us
u.s. officials have declined to comment
that 's all clinton said
this will take time
we have very little now
the statement did n't give any other details
israeli police declined comment
i 've been close she said
i was n't there he said
it is not the case
final results were expected to be announced friday
a defense ministry spokesman said the ministry had no comment
you just have to go for it
administration officials declined comment saturday
iraq has three points
without public support the united nations is nothing
you just have to control it
he was taken to a hospital
those plans include
it did n't stop until he died
it 's all or nothing
i think they know that
no one was injured in any of the attacks
bush officials did n't immediately comment
all were released saturday
an army spokesman said he had no immediate comment
they played as a team
no financial details were given
i know i can do it
but i 've got a long way to go
they 're there too
the law has never been used
they have the power now
there was no immediate comment from french military officials
he was never the same after that
it planned to issue a statement later
a case could be made for that
there has to be action
the israeli army closed off the area
but they are not there
i know that he said
i just got here he said
we do n't know what 's going on he said
we thought he would
it 's her time too
that 's not the only change
right now i know nothing 's going to run away from me
he was a big and strong man
i said i do n't know
u.n. officials said two people died
he wanted to keep going
the statement gave few other details but planned to release more later
this one may not be
the spokesman refused to give further details
i always wanted to play here
and that 's not right
they were good men
he said the man may be charged
other new team members are
no one can take that away from me
i thought i hit a good shot he said
they just like to help people
i know i 'll never be the same
so i think it was good
no one wants elections
i do n't want to be but i ca n't control that
the war is not over yet
it 's great to be home he said
it was not known whether he would meet the president
committee members could not be reached late friday for comment
we 'll know them when we get them
we need more people like you
that was the end of that he said
the israeli military said it would have no immediate comment
i 'm going to play for free
the details are to be released later
it is a big change she said
we do n't think he wants peace
his name was not released
it 'll be a change
now it has its last chance
it 's an open city he said
you 're trying to put the fire out
there already have been problems
it 's very important information
but it did n't help today
there was no immediate comment from the company
it 's time to make peace
some people like me others do n't he told reporters
that would be the government
i just try because i want to make new record she said
he said more people might be charged
but two years later it was over
no other details were reported
the right thing to do is nothing
then they played the third set
two people had died
i 've got to believe that we can do it
we 've got a chance
he is to visit china and japan this week
but that 's part of the game
we just need to give them time
he said two more children died later
there was no immediate comment from french officials
come out and see us
it 's the companies
that 's the only thing i do n't like
but that was about to change
we have to believe that we can do it again he said
even now i can not believe it she said
he has not been released
do you want to end up like this
she does n't like it
but that 's going to come
i would like to go back and help people who got injured from the war
i 'm never going to make it
we said people were going to come and they did
and there 's a way and there 's a way to stop that
it 's great to have a new life
but we have no comment on that
the second is expected to be finished by the end of the year
the french government refused
they have to do their job
the most important thing is peace
he was like family
i had a great time she said
we do not really know
their appeal was rejected thursday
he would n't give his last name
they arrested one man
the four were arrested sunday but have not been charged
but i ca n't do that
she said she did not know whether parliament would take any action
he could not be reached for comment on saturday
it 's very different from last year
she immediately agreed to help
it is scheduled to last for 10 years
but it 's also trying to make a point
i think it 's a great trade
officials could not immediately be reached for comment on the case
it was the right place she said
but we will be back
it still has n't hit me yet
they do n't know what it is
they will not have to show up
in washington a state department spokesman said he had no comment on the report
such a move was expected
there were n't any
we 're going to try
he says he is a french national
it is just a family decision that she wanted to make
we know we can win
we are a very united team
we 'll be a strong opposition he said
this is very important he said
there are not a lot of people who gave us any hope for it
he died as she held him
the other is that the world will go on
final results were expected monday
iraq has little control over the area
i do n't think they used it to make their decision
it 's really important she said
a third round is scheduled later this month
there wo n't be too many people who can do that
it 's still too early she said
the british people are a great people
we 've seen some of the same things
i have a chance on sunday to win another one
there was no immediate comment from the israeli army
i do n't think that 's the case he added
i do n't want to stop now
i 'm going to get this
he still has not been tried
this was one of them
they did not release any more details
its report is expected next week
it was n't his day
united nations police refused to comment
the spokesman said a decision will be announced by the end of next week
the issue is money
his spokesman said it was an army issue
that may take a while
that is the government 's job
you would not have seen such action before
the process could take days
he gave no details of the agreement
it would be great if that 's the case
she lost the first five games
death is for all of us
however the bill still is not expected to become law
but he was n't set for life
we 'll just have to go for it
he said he had no details
it did not name the country
with the new system she would n't have to
this agreement will open china 's market to the united states
the military said four soldiers were killed
we just wanted to show that we support peace she said
that 's the best we can do right now
but they need help
an israeli official confirmed the report
i did n't like the violence
a final decision has not been made
i vote because i have that right
the hospital did not comment
the federal judge asked city officials
court officials also declined comment thursday
but it 's never too late to do the right thing
the hospital declined to give further details
there were three of them
but he said bush said he may not have the time
but i do n't think it was the right time
we 'll try our best
the fight was too close to call
but that 's not new
a decision is expected later this year
you are very strong and you will make peace
it is expected to be released before the end of the month
there had been no reports of political violence
they will be tried before a state security court
it 's going to be a big deal
he said he did n't
he has four other children
i will have to stop it
i have to see it through
he also said i will fight again
he is close to them
i hope i will help do that
the second one is monday
or might he have taken his own life
and you will be too
many people believe he won the last election
the military refused to comment
we did n't get an out
you can run away from it
the market was closed thursday
we like going to the top
i 'll just take him out
i 'm still there and i have a chance to win
the company could not immediately be reached for comment
a police spokesman could not be immediately reached by the associated press
do n't be like that
the state department has not confirmed the meeting
it 's not over yet he said
there was no immediate comment from government officials
we want more she said
it closed last month
you 're going to get this one
he left before the end of the game
this was later confirmed by officials
if it was n't for him there 's a good chance it would n't have taken place
we have to hope she said
the hospital could not be immediately reached for comment
so i still have to fight my way through
i have n't lost hope
a defense ministry spokesman denied the reports
she did not return
i would like to have a new life he said
our goal is to win games
it 's been my life
it is expected to last a year
the agency gave no further details
four other scheduled games are still being played
they ca n't take that away from him
but i ca n't believe that
she was arrested by palestinian police
a defense department spokesman declined to comment
we have one country
we will never give up
he did it on his own
police have not released the man 's name
i have players that use it
there should n't be an appeal
it 's been a while he said
we think we are going to make that
she said his trial began tuesday
white house officials did not immediately return a call seeking comment
he wants to be a great leader
i really wanted to be here
he was arrested the next day
i think he has got to go with two things he said
we are a great team he added
the military has refused to release them
a few other players have also got a chance
after his release he left russia
i plan to play the open she said
i did n't do that before
he 's a very big shot
talks were expected to continue on that issue
israel is not likely to back down
we would have been there later on
still this was not the best time for it to go that way
it was time to party
you ca n't change what people think
it was time to go to japan
this is an issue that is there
the company gave no details
it 's a very important day he said
a u.s. official said
he had no comment thursday
we agreed to do it
this is good news for the american people today the president said
that 's really the goal
and we 've got to deal with it
you have to be there at the end
that would not change
the president 's office had no comment on the meeting
there was no official comment
that is as it should be
she said she could not release any more information
u.n. officials declined to comment
the reports could n't be confirmed
he does n't have to he said
the government has denied it
she denied she had a deal
the round 's other games were played saturday
they are not fighting
i just need to fight he said
the group could n't be immediately reached for comment
and i 'll do it again
then it was down to business
i want to play and i want to play a lot
we just need some results
you can see it in his face
it 's what i expected she said
you 'll make more money
some hope he 's right
that 's all part of the game
then there can be no problem
some had similar problems
i think you can see it
we can not do that he said
the company has not announced a price
i thought it was over
i did other things
the only thing we want to do is show results
it will be a big big party she said
israel later denied the report
i would like another house he said
u.s. officials refused to comment
people are used to them
these people did n't get much help
we found a new way
the men 's final free program is thursday
the official would not give his name
you must be strong
russia has denied the charges
but that does n't make up for it
she refused to give any more details
the israeli army had no statement about the report
there have been so many
we are trying to get him
it 's a game we have to win he said
he declined comment on thursday
it 's got nothing to do with us
a final vote is expected friday
police said five people were arrested
the report has not been confirmed by u.s. officials
if they keep me i will play he said
and you do n't think you 're going to stop
it is now time to move on
the companies agreed
the agreement came during a meeting with rose
some died on the way
it is a problem that will always be there
the team did not immediately comment
by law only parliament can do that
get them out of here he told the others
the government has denied these charges
the decision will be final
it 's part of the deal
the foreign officials also were to meet with bush
i get to keep my money
we will make it she said
who 's going to help us
many are believed to have left since then
he was n't going to trade us in
that is not the problem
we just get to vote again
i do n't even know if it would make it today
nothing is going on
we will not be able to stop it the official said
i believe people can change
he has declined to comment
he reached the united states two years later
all six were being held tuesday
japan 's foreign ministry denied comment on the reports
he also called for an international peace conference
the state department said it would keep trying
they think they know my game but they really wo n't
there 's always the next game
now that she is back her problems are back too
the other results were
if they give me money i 'll take it
three were injured
it 's time for you to go
he said he would be out of the country
friday was one of them
we would have died if we tried
he declined to take a call monday
this should n't be he said
but i 've never thought like that
officials gave no further information
the defense ministry declined to comment
i think she 's going to win the president said
if you need more troops i support you
japan can still appeal the ruling
one can not see any other way
that was three days ago
but there was some good news
i ca n't change what i like he says
i 'm going to continue to try and play
police would do it for free he said
if we do n't we 're a good team
it 's not a political case
those are things that are important to us
then he called the police
she has never been found
i did n't have any problems for the last three years
it should not be made public
i have nothing against the players
no appeal is allowed
there 's been no change
it 's time for bush
i do n't think we do
but that may not last
there 's nothing i can do about it now
that was a good time
the others did not
this is his decision to make
at the end of the day i 'm british
the report was not confirmed by the united nations
we 're still there
it 's going to take a lot of work
that would be great she said
the united states is a big country
i could n't put it down
i think it will go on for a while yet the spokesman said
but it 's a great place to be
that 's the only condition
the u.s. government really did a lot of work
that 's the only thing you have to do
iraq said four soldiers were killed
it 's nothing to do with that
her office confirmed the agreement with the north
so it 's different
that can not be good
the defense does n't give up the big play
but that is n't the way of the british nation
you will see more of this
it 'll be a good fight
we can play with them he said
there must be a united team he said
all three were killed
this is the time of my life
she had been shot in the face
we are also a part of each other 's future he said
city officials said an investigation is under way but refused to comment further
he just said he is going to play again at some point
but it 's the same
i do n't want to know
it did not give details about the companies
many have been killed
she said she had no further details
then they went after each other
he is expected to back the move
i really think i can get taken out at any time
i want us to be the way we used to be
it may have been the peace
many did n't make it
there have been some problems
there is no place like it in the world
the army would not immediately comment
you have to get there
it should n't have been a problem
he was not expected to be charged
their business is war
that 's the way it will always be
the police were called and the five were arrested
government officials refused comment
military officials could not immediately be reached for comment
he declined to comment further on the investigation
they can see you but you ca n't see them
but we 'll see later
but that could change
some people refused
no new fighting has been reported since tuesday
it 's time to make our move
he is working on that
i just ca n't believe it she said
u.s. officials would not comment on the issue
he had not been arrested
the process must be finished by the end of the year
i could do without this
i still have to play
other reports said three people were killed
he gave no details and officials refused to comment
but there can and should be more
they declined to give details
officials have not released details
no trial has been set
other european countries use this system
i have to keep on going he said friday
i have a good life
a police spokesman declined to comment
i may not have the power they have
i 'm not going to back off
and all these people came
there is still a long way to go he said
many had lost all their money in the stock market
he is the first of the group to be arrested
this ca n't be the end of it
if he does n't play he 'll coach
but good things come to an end
no one had been arrested
there is information
there wo n't be any return for me he added
no new attacks were reported tuesday
two games later they closed out the set
said the eu official
so i do n't want to stop
they really got into us
we 're going to take him on
it 's a long time he said
i found my country
it may not last long
you can also see it
a united spokesman did not immediately return a call for comment late wednesday
others just give up
it 's the start of a long process he said
a ruling was expected tuesday
you 've got to have some goal he said
this will be his third start of the year
i ca n't think of one
as expected her name was n't called
the public has been great
but she got some of them
there 's a long way to go he said
they only know the last few years
but it wo n't be the same
there will be an investigation
there are many good women
we just need to go play a game
that 's not the case for a few others
but there would n't be a next time
it did and he does
i do n't have it yet
that 's the way we played all last season
that was n't part of the plan
but will it make for a great final
you got to want it
the government wants more international help
several others did the same
the trial is not open to the public
there is no other way i could do it
people do n't know that he said
russia will not know what is going on in the united states
he would not name the companies
they were all men she said
elections are planned for next year
but that might be just the start
but it 's time to move on
there was no immediate information on the condition of the injured
this is a good place
four others were also arrested
there will only be war
i have been given no such information
war is war he said
it gave no more details
officials did not name the company
it is not known if these two games will be made up
u.s. military officials did not comment
and this vote was n't
if it 's not one thing it 's another
and it wo n't be the last
i think it 's time he said
that 's part of what we do
i just want to help the team
officials did n't say whether results would be made public
but new groups have appeared
no report has been released
i wanted to support her
it 's the right time to go back he said
he has been through it before
they had no other details
if i can play i 'm going to play he said
it has rejected the deal
no new talks were scheduled monday
they 'll never get it from the coach
the party did not immediately return a call from the associated press
a bush spokesman did not return a call seeking comment
he may want to do that but i do n't
it was right after the war people had money
he said the plan would include
we would like you to have another chance to help out the country
it 's not american
but you still have to work with each other
she said no one was injured
the foreign minister said
but the military denied the statement
but it did n't end there
we 're going to have nothing he said
i think it will be a great game
he 's part of my family now
he died more than five years ago
bank officials declined to name the companies
that has been confirmed he told reporters
the white house had no comment
the report is expected to be released tuesday
i want to see him play
share it with people
the right city won
the official said he has no other details
because she is american they can market her in the united states
president bill clinton has one
we 're known to do that
i think we are similar in this way
it was just by chance she said
he 's set for life
the team has to go on from here
but it was n't the end of her problems
two workers were reported injured
the army did not immediately comment
he said he did not have details of the case
these people have nothing he said
we expected to win the game
i think it 's possible she said
the city was new york
we ca n't change things up he said
that can not continue
he is the first to go on trial
the trial is expected to last until friday
call it at the other end
we 'll have a good world cup
there was no immediate comment from the united nations
his decision had been expected as early as last friday
he lost in the final last year
but we are also a people of hope
others released later
he has never played
the company said it will appeal
but that is the way it is
others were killed
i do n't like them she said
the united states has no such program
we 've got to keep fighting
the election is scheduled for sunday
he made them for others like me
he gave no details of the meeting
all are being held without trial
this is what i do he said
now it is the world cup
i hope we can see more of that in the future she said
he said police did not know who had the right of way
his team has the most new members
it 's always a big game
i can go home with my head high
police officials refused to comment on the case
we could force them out of business
that 's good but i do n't want it to end yet
that was not the case
they played and lost
there was no immediate comment from israel about the fighting
now i can see that house he said
but officials have said it 's a good lead
but it would have been a very long shot to win
what 's the point of that
they scored and we did n't
i do n't think i will last the year she said
then there 's the money
it was the first such meeting in several months
we have a shot and he 'll get a clear run
our soldiers will give us support he said
i just need to know
it has refused further comment
israeli officials agreed
i thought i could n't win today
he did n't like it
this should be rejected
clinton asked a group of reporters
i do n't think you 'll see a change in vote he said
we could n't do the same
they were great he said
the best thing is to do it without that he said
i support him she said
they 're for change
i 've never seen such people before
the court did not issue a ruling monday
i know the war has been no good for me he said
that has not been held
they want the nation to go in a different way
i need to be there
we do not have to fight
he could not be reached for more comment
i want to do what 's right
it was a big help to us
i 'm never going to get this chance again
we need people who can do that
i just did n't think there was a time or place to do it
i 'm fighting for it
they just want money
so she 's going to play against men
the men are still under investigation
it 's never been an issue
the force can not see action until a final peace agreement
this man is not one of them
you wo n't like it
this is never a good start
these are our people
it does n't have to be that way
it later was added
he says he will run again next year
both players were injured last year
work without workers
only two people were arrested
he never held another one
that 's not the case here
take us out of here
we 're here to change the city
money is the problem
that is a very high return he added
i could n't get up for it
the group did not immediately comment
and i did n't want to run today
it will be his call
some could be free
sunday was n't any different
it 's been a great few days
there are very few people that do n't want it he said
i do n't know any other way
they were expected to visit israel later this month
we want to continue that hope
they never lead to peace
he left the party last month
but we got through it
a vote was scheduled later tuesday
we won all our games
they do n't think it 's a big deal
another is security
it has been a long time
the israeli army had no immediate comment wednesday
he was n't injured
i know what went on the first time
i hope this is the part
there was no statement released after the meeting
the problem is the defense
the defense ministry refused to comment on the reports
now is the time he said
the group later denied it
they do n't have that much time
i think that 's an issue
police said other charges are possible
he was n't the only one
that was the good part
the company could not immediately be reached for further comment
the man was arrested
that 's their business
it 's the one chance we get to make some money
he did not name the companies
but i like these things too
i did n't want this for the government
there is a government
i was a member of all three
there are two problems
but we ca n't control that
now it 's different
i told her to go in the house
there was no immediate comment from election officials
he said the two would meet again thursday
prices are n't the only problem
final results were expected thursday
it did n't give any other details of their case
the man has denied the charges
i just do n't see it
a decision was expected early next year
at the united nations
i think we can do it
who will have control of these men
this is the way it should be
that was never said
now they have some help on the way
the president does too
which is not to say it 's all problems
and i think it 's a good thing
another federal minister was injured
two months do n't make a season
she had no further comment to make
she later refused comment
i just wanted to take my time
a third man was injured
it won third place
who 's going to be the future leaders
he did not immediately return a call
final results are expected next week
it 's good to see us back on top
this race is over she said at a news conference
the president has not made his decision she told a news conference
now i 'm trying out different things he said
i 'm not going to stop until i get that he said
the final agreement was not expected until saturday
it was expected to continue through thursday
he did n't back it up
it is the only way
i just hope i can keep going
there was no u.n. comment
they should not have been made
this may be the last chance to do that
the rebels did not immediately comment
i need to see a trial
that might be next
he declined to comment further on the case
it was also a very late start in the day
the company did n't back down on that issue
a police spokesman confirmed an investigation was under way
each team has three men on the court
but he does n't do that
it was not possible
little went according to plan
i wo n't be this year
i really do n't think i can be put down for this year
now will be no different
they did n't release his name
no talks were scheduled
he said they may meet next month
since then there has been one problem after another
you have to give things up she said
we did a lot of good
she just ca n't get away from it she said
israel said agreement was very close
i think we have a good team this year and will win he said
to me it 's all important
he will be fighting in the united states for the first time
but we have no power
no prices were given for the shares
the people need it
we have to make the violence stop she said
the army confirmed the attack
we want more he said
no decision was expected this week
both were later killed by russian forces
the hospital has declined to comment on the case
this is one of the things you ca n't control
i need to win to keep this record going he said
there are many of us
the head has not been found
it 's a good way to start the year
this is n't going away
we just have to give it time
do what you believe
no one wants to win more than i do and no one wants to win more than our players do
i ca n't have that
we still have to do our best
that 's all you can do
a party could appeal the decision
security and defense
i do n't need the court
federal charges could come next
bush was not injured
the president did not comment the minister said
she was released the same day
the u.s. can appeal the decision
you have to be on top of it
he asked the others
the soldiers declined to comment
he must have known
china agreed last week
the case is n't expected to go to trial for another year
the money does n't help the people
great start to the year he said
we 're not yet finished
that was 10 years ago
there 's no problems
he denied the charges
i just hope we do n't get another one like this she said
he refused to comment on any of the injured
she 's our only hope
it would be great he said
it 's a team that has a chance to do good things and i want to be part of it
no action was taken by the judge
there will be no comment he told reporters
they will want to go back
the u.s. military had no comment on that report
some things take time she said
he just did n't fire
the u.n. must not back down bush said
the second is defense
he had no immediate comment on sunday 's attack
it was the last point we wanted to play
he made no public comment
he also would n't give his name
this is our family
he does n't need them
and we will never do that
you have to take one round at a time
a ruling is expected early next week
she won that match too
an army statement was expected friday
that case is still open
i think they are going to be the same
that was their best match
you should help the family
she declined to say whether the government would force people to move
no one was injured in friday 's attack
a russian news agency reported that seven people may have died
the first trial was big news
i said we got to make a play
that 's his decision
no decision has been made on whether he will be allowed to play next season
he did n't want to give his name
national elections are not expected until next year
he said he would not try again
it never came she said
you should n't go back
sunday 's match was his first start of the season
that deal fell through earlier this month
we can start right way
the final was scheduled for sunday
that 's when you press
tuesday 's vote in
but if it 's not that way you go to the next one
we do n't want to do it
i want to be at the top and i believe i have the game
i have a great life
come back another day
but the european union is not
you would never have believed it
we did n't see that
so what 's the problem
that 's life he said
elections are sunday
this is a new team now he said
then there are the little things
it 's not going to be the same he said
the process is not used in the united states
they think their time has come
life will go on he said
but it wo n't be all work
people will come back
these reports will not be made public
which was for the best
i 'm a wanted man he said
another meeting is expected next thursday
i have a little group there with me he said
i really wanted to make it he said
he planned to try again
police said 10 people were killed
the government has released no other information
we were able to do that
the visit was expected to last through wednesday
the government made that clear monday
they were released today
they did and we won
they have a strong defense
it does n't work now
the member states want it
the home ministry statement said
six other soldiers also were injured
but things can change
but they know there is a long way to go
bush i 'm going to start off with a statement
no final decision has been announced
a police report said an investigation was under way
nothing is planned
this is a very big deal
israel rejected the call
but they would n't go
they should be able to do more
that 's what i want
you have to make a decision
a company spokesman did not immediately return a call for comment
the other is to work
they would come home with us if they could
they were arrested the same day
we should be able to do this he said
but there was a problem
he has denied all the charges
that was n't possible
they never got a chance
he added that he expected them to continue that way
the ruling is expected to take several months
two children were among the injured
another minister went sunday
but he said money was n't the most important thing
the final decision will be made by the u.n. security council
officials released no details
you 've got to see this
today she has them
he said that was under investigation
bank officials could not be reached for comment on sunday
and there has n't been a fight
the report is expected next week
i think we could do that
it was like a party
the goal is to not have a war he said
i 'm a man 's man he said
i can not believe it
they have the money
i had to keep going for it
early results were expected on sunday
he did not name the hospital
but it was not clear whether the meeting took place
but i 'm going to do the same things
he said that was not the case
today was my day he said
three other people also were injured
he got up as we left
she also said that he did see them
the bank denied it
we do n't know the way
we think that we also share a lot of the problems
we believe that support should be there he said
its shares rose on the news
the process will take months
she 's been arrested
who will be the others
the trial began monday
the three were arrested last week
no fighting was reported
it was never with you
that was my problem he said
we 're there now he added
they 're not part of the process
i 'm going to need all the help i can get clinton said
these are not new forces he said
the reports also have n't been confirmed
we think it 's possible
it 's time to end this
she died wednesday
the united states is important
bush was a director of the company
he said he had n't
we had a good administration he said
he still has that hope
i never really think about it
the trial is expected to last for several months
i think that was a lot of her problem
after working out tuesday it appeared his decision is n't final
the report said the case was under investigation
you ca n't stop him
i thought i was hit
we do n't have this money yet
then another call came
he was reported to be in good condition
it 's lost if you think it 's lost
it 's round one he said
some even left the country
there are problems
this should be a big deal
you know you want to see it
now he ca n't go back
there is no law today
but he won it last year
we do n't and we did n't
you really are free
one is a problem of security
they have n't won over the people
they have not found them
but there are many others
i want to win with them
the results are expected to be announced today
china agreed last month
i think we have a great team
i need all the help i can get
i always want to attack
if the same people vote on it i do n't think there 's much hope he said
i did n't even know it
you only need one he said
he was not able to give details
that is their goal
five other men were injured
could they do more
the decision 's been made
we will be working with them
i do n't work out the points he said
i have no comment on that right now the coach said
the company is scheduled to report results next month
and it does n't stop there
we believe there has to be one
no return fire was reported
there were no reports of fighting on saturday
she had few other details
it 's going to be different
two police were injured
we think that that is important
the investigation is expected to take up to a week
my victory is also for him
he died three years later
in washington state department officials declined to comment
then i think it 's too late
but they have problems too
if we have it we will use it
that 's what got us
he said he did n't have any further details
one problem he does n't have time
they did not meet him
but she may not be the last
we do n't want to see this end
the company 's stock rose on the news
she died a few days later
and that 's the point
i believe an agreement will be reached in a few days
this agreement will help them
he also did n't win
that was the meeting point
this is their shot
we have not finished this job he said
the war is over he said
they 're expected to play he said
the military did not immediately comment
i ca n't and i wo n't do it
if you get things going you can really move right up there
police confirmed the attack
but that could be a process
it 's great to end it on one shot
it 's too much she said
but it will be all right
the spokesman refused to be quoted by name
there was nothing i could do he said
the goal came against the run of play
now is not the time
final results are expected later this week
and the government still has much work to do
for me that was a problem
now it 's our time
they asked for security
it was n't a race he said
i was never able to make that call
the committee is expected to include no more than six members
he will be fighting in the united states for only the third time
nothing has appeared until now because the investigation is not finished he said
now i know the way he said
we have a lot of hope
that did not change with tuesday 's election
i do n't want to get injured
people do n't know my game he said
for the french it is clear
that 's not the only problem
and the meeting did that
all you 're being asked to do is believe him
the game will be played monday
three people are reported to have been killed
it just did n't come today
do you think they will do away with that
are scheduled to release their results
then again it 's early
but it 's a team game
he went down but found only two of them
both came on the power play
now i 'm open to this
i still have to do the work
not all have been arrested
i think it 's that good
court officials could not be reached for comment on saturday
it is for this fight
we put up with it he said
that 's the only thing i can think of
authorities did not immediately release the man 's name
it gave no other details of the plan
the money did n't last long
we 're working on it
the two could not immediately be reached for comment
elections are scheduled for wednesday
however i did n't give up
two million days were lost that year
it is not known in the world
but that was n't always the case
a foreign ministry official said the meeting was scheduled for saturday
he should have had a chance
it 's a little different deal
so that 's the way we have to be
there was no need to do so
i do n't like this name
both were rejected
they do n't like me
that 's what they say
but the game was not over
now there are four
they did n't release details
this job is just as important he said
the first won her appeal
it 's the next round
there 's no way we should play
the talks were scheduled to end thursday
police could not immediately be reached for comment saturday
i did n't think it would take this long
but they 'll be back
he told reporters wednesday
they just might not want them
i 'm not trying to play games he said
it 's not going to be over in a day
he said the vote could come as early as next monday
but he says he 'll press on
i put those people in place
i do n't know who will be next
you just ca n't stop it
final results were n't expected before monday
things have got to change
union officials did not comment
that decision will be made monday
we support each other
there is no violence
the reports gave no details
and could not be reached for comment
and he does n't want war
he was also scheduled to visit israel
they said they were lost
i wanted to help people she said
now it 's their decision
the statement said further violence was possible
officials denied the report
the white house had no comment friday
that wo n't change
i have a lot of time
we 've played against each other since then he told reporters
government officials refused to comment
others had no family
this is what i want
it had no other details
it is an economic decision he said
here we have nothing
i had given up he said
and i believe they will
then they are on their own
until then we will make no further comment
but he declined to give details
but it appeared no second vote would be taken thursday
the chance to make big money
we have to play our game
i 've been able to give this more life
last year that fell to seven
it was a great time
we need the international troops to keep the peace he said
the russian team came to visit
but that should n't stop us from trying
they are scheduled to meet again next month
now it is different
the judge has the final say
another show was planned thursday
the eu bill also would
but i do n't think they will go see it
the best thing to do is to do it his own way
the news agency said other information would be released later
and that 's what i did
i do n't think they can
he wo n't try for a second one
he does n't want me at all
there was no immediate comment by the military
that deal fell through
it is my second home
he did not visit with any family members
there are too many he said
we must come see her
i 'll try to do my part
there should only be peace now he says
there is little support for a war with iraq
a government spokesman denied that a decision had been reached
but home was nothing like he left it
we know that it 's going to come back he said
i thought it was going to be a really great day
i always think of him first
so did the united states and japan
it will continue he said
i do n't know what 's going on
they do a great job he said
his trial is expected to start monday
this job is too big for any one group
he has said he used it to run his ruling party
police declined to release further details
he was like a leader
he is now being held in the national police hospital
the meeting came off
here i have nothing
this case should now be closed
we are working on it he told reporters
one shot is nothing she said
he denied reports they had been arrested
no he said at a news conference
he did n't get it she said
we just do n't know a u.s. official said
there is no free press here
we will not appeal
that 's good news he said
then we will see he said
this is not possible
i did n't know that
the results were announced tuesday
still he says he might not return for another season
he is important to us
at last it might be the end
i do n't get into that
they would give no details
it should be just the start
family members could not immediately be reached for comment
it did not comment on the use of soldiers
we do n't know those people
we want to get another one
he would not release any details
it 's an economic issue he said
police refused comment on the report
they know they do n't have any future he said
i have to work on that he said
he finished with seven points
both were killed by security forces this year
the team announced wednesday that he would be out for two months
he has no children
they could n't do that
after a while i just could n't take it he said
they do n't like people like me he added
she died on sunday
they 've got a lot of good players
now i 'm the only one in the world he says
now they 've got it
but he is on his last chance
he 's trying to do the right thing
with us the problem is people
a vote is expected thursday
they can meet them
i can see it in the final
you never say never
all players should have such problems
u.s. officials could not immediately be reached for comment
it 's time to stop it he said
if you take a shot you take a shot
he 's used them against his own people
that 's not my job
i like what 's going on
all three denied the charges
more results were expected early monday
if you ca n't play it you ca n't play
both countries have troops in the country
he should be allowed to show up
they had nothing to put in them
and four more years
most people are n't
who 's going to own it
there will be no return he said
i can just show up and do it
there 's another set to go
then again he might not
hospital officials refused comment
i want to be there for him she said
i wo n't give it to him
think of it she said
and we were n't one of them
i think we made the right decision
it was n't and i did n't
i have won some and he has won some
i really wanted to go
hospital officials declined to comment on the report
this is the top of the top
the agreement was reached tuesday
we will fight you from there
the match was then over
it has yet to start
his plans are not new
it has to be tried out first
it has been killed
we 've still got the players
i have been out of a job during the last four months
a news conference was scheduled
they also played in the world cup in the united states
she did not give any more details
there 's a decision
he 's part of our life
israeli government officials refused to comment
it does work he said
the report has not been confirmed by the family
we 're going to fight them
they do n't need it
we still have a chance
no police were injured
nothing was hit and no one was injured
three have been killed
they took the game over and they won it
it 's such a big thing
we did a good job on defense he said
i do n't think it 's very likely
i had to run with the men
both thought the race was over
i think i will be back
palestinian officials have rejected the plan
friday first round
a foreign ministry spokesman denied the reports
it 's like a city he said
she was arrested monday
i think this is a great situation he said
the company gave no details of the investigation
she would not give more details
the final decision would be political he said
an appeal was expected
if people do n't like it they do n't like it
the results were released wednesday
that 's the only way you can stop it
then things change
for some it 's too late
we want to make a deal
i never see them like that
we made a good start of that today
it was not clear when the investigation began
they 're all big he said
but they also say this has not been confirmed
we just are what we are
i want you to believe in me again
i know we have a lot of good players
it 's been a long year
that 's nothing to us
would n't you know it
company officials could not be reached for comment monday
we 're as good as they are and they 're as good as we are
he said a statement would be released
i 'll just have to get used to it
it was not known if they were killed
this is his final home game
the united states says it did n't
it 's going to be that close
they won their first five games
there is no business here
that was my first time she said
it might even work for us
you do n't think about that
but it still was n't the end
i 'm going with it
thursday 's decision is final
the government should see to this
he 's got such a big game
we have a great coach
he can become a leader
more help may be on its way from washington
three others were injured
i want the world to judge us from this team
japan could use the help
he won the first five games of the match and the last four
after the meeting he declined comment on the talks
we need this in the government he said
i do n't want to go home after three games
i do n't think he 'll be out long
it 's too early to say he said
they were released the same day
that program also has come under fire
china is a big place she says
two women were among those released
i 'll do my best he said
they will need to come again
they 're going to have to run me off he says
there 's been an agreement about that
we have a good team
this is my home state
then he says we lost
it 's an american issue
the investigation was expected to take some time
it did not report details
but the police denied that
it was a good first day
i 'm working for the future
a news conference was scheduled after the talks
it will be a very close vote
that 's still possible
we believe we can win
nothing is more important than that
union officials could not be reached for comment
i did not think i could win it
it was too late by then he said
a decision is expected this month
we 've won the war he said
all are members of the government
that 's for the players
it could be several months before a decision is reached
i do n't think that 's the end of the war
we are market leaders
japan 's foreign ministry refused to comment on the reports
no decision is expected before late next year
it was released last year
people are working
he said those details would be announced tuesday
but they have a really good defense
there was no immediate comment by the rebels
their number was not given
a company spokesman did not immediately return a call seeking comment
the japanese government has rejected the report
then she injured her back
the case is on appeal
she has asked that no other information be released
they said they hope to open it to the public early next year
another man is scheduled for trial
in that case they would be killed
i could have lost that first set
so it 's a big game
who is the security council
so people do n't move
our game is too international as it is
we just have to fight through it
but he has never been a head coach
if i do n't i do n't
but that will always be there
i do n't need a number he said
but would n't you know
u.n. officials could not be reached for further comment friday
it 's so important
the minister asked for an investigation
the court did not comment on its decision
it does n't help he said
the past year has been a time of change
they did not give any details
the army did not immediately comment on the ruling
i do n't have the power she said
we 're a police department
we 've played against each other since then he said
two people have been shot to death
i did n't want to deal with it he said
our security forces are on top of the situation he said
for us it was a big deal
this time they are not going to stop
but will she go back
we came to get three points he told reporters
police said several were injured
that 's part of our job
one group was left out sunday
the u.s. military did not immediately comment on the attack
some say he had asked for too much money
this is its end and i will be there
many council members were party members
that was a big problem
that is just my state of life
i think you should know that
that is the way we are
we 're really going
they will come with me
the two were arrested friday
he also declined to give any other details
and this is not the british way
the case was put over until wednesday
he said no soldiers were hit
he said the case is still under investigation
it was a great race
he refused other comment
one man was arrested
he was not expected to return to the game
you have to back him up
no action was taken on his case
this is the day of the people
no rebels were seen
so what 's new here
we want more money
do you want to get into other things
it did n't give other details
all four denied the charges
i do n't think we will
we 've got a chance to win it all
he did n't comment further
that he would n't say
we will use force in these elections
no details about that case have been made public
he did not name any countries
i ca n't believe it
she gave no news conference
the meeting was told that
the most important thing is that we won the game
officials could not be immediately reached for comment
i had a great time he said
who would n't want to win that
this does not do this at all
they never got to see the minister
he 's not going to give in
the money will be great but that 's not the only thing
but officials said they expected similar problems wednesday
they told me to keep going he said
however others want change
it could be his year
the other two did not immediately comment on the decision
it could be late but that 's our goal
he even scored a goal
he also does n't want to be arrested
i do not know right now
but the israeli army denied this
no security problems were reported
government officials had no immediate comment on the reports
no other details were announced
ministry officials could not be reached for comment
three games were played friday
you can believe it
it 's been four years
i had nothing to do with that
that was a big big part of it
it has always been this way
it was also their last
now that is not the case
you do n't have to give it up
it 's also good business
but i keep on fighting
we did n't have money
you 've got a big decision he said
you are the leaders of the future
there 's one further problem
palestinian police would not comment
now it 's too late
no one has been charged yet
i just tried to do my best
police denied they had used force
i did n't think i could win this match he said
he could make money
he 's good he said
this is my country
you ca n't do this
but he was just too good
he then left for israel
we need to be close to the people
so what 's the good news
he said he did n't plan to meet with any of the five
now we 're trying to make up for it
i really believed we could make it he said
it was just business
we will do it again
more than a lot of men you can believe it
they 're my second family
is there any other way
they want you to help them
both things at the same time do not work
but this has not always been the case
i think this will be the last meeting he said
this is going to be a long campaign
the official would not comment further
share prices also fell
that is my problem
it 's a great time
it 's big business
we did n't really want to change it
it 's all part of the same fight
he refused to comment on the charges
bush officials have not confirmed the report
we 'll take a point today
it 's the only way i could help out
it was really important to get off to a good start she said
and this is n't a weapons system
but that 's just the way it is
he was immediately arrested and charged
this is not a time for party
a decision was expected later this week
it did not give any further details
the trial is expected to last until next week
i came to visit this year
we are the party of hope
but this is not a political decision
it is a u.n. issue
i tried to fight to the end
france has no troops there
but we have made that decision
even after a win you ca n't make a decision
but it was n't working out
then they 're expected to trade him
i want to make this my home
he added that five others were injured
we fight as a team
there were no early reports of violence
but it does n't change the past and it does n't change the future
i just want one play
you 've got to stop it
the government has also refused to work with him
a final decision is expected next week
but that one point did n't change the match
it 's going to be great
local police could not be reached
the move did not work
his trial is expected to last for months
he could n't think of one
the deal had been expected
but we will take it
all of us have agreed he said
this team has that
i did n't want to see them
job security also is an issue
they 're still part of our family
i say they 're a good team
he did not give any other details
there 's always a different way to play
it was announced wednesday
the game is never over
the ruling came after the stock market 's close monday
the palestinian minister said
iraq denied that tuesday
there was no immediate official comment from u.s. authorities
she asked me if i thought this was the right thing to do
that 's what it was
it will always be there
and we do n't have that
they 're not going on to great things
the security council is also expected to meet wednesday
it had been like my home
and that would take a long time
i did n't have to he said
it is really a market
but i do n't think it is
she just had to show up
two israeli soldiers were killed
it 's great to share it with them
we have to move on
if i do n't i tried
the bank plans to appeal
government officials believe they can change that
i would like to believe it he said
i want to go home to my people he said
but no troops had left
i think that 's the important thing
there was no immediate comment from the bank
he left the game and was taken to a hospital
no vote had been scheduled
he said that decision would be made next year
and we 'll make that case
we do n't work he said
you have to have it
they 'll do their best
there is one problem
no further details were expected before thursday
it was 10 years ago
details are to be announced monday
u.s. officials had no immediate information
but it 's a business
there was no problem with that
last year 's game was held after the season
he did not have further details
we are fighting against a system
it 's been a great year he said
you have to go through that season
the men were released
he would never do that
we do n't want to control people who do not want us to control them
it gave no other details of the meeting
it 's not going away
the council refused
if that 's not the case there will be a second round
i did n't think i was going to win it again
the decision is expected next month
thursday 's decision is not final
i 've had a great time he said
white was taken to a city hospital
it 's time to change
more talks were scheduled wednesday
a new round was scheduled for later this month
but the group 's leaders said they had nothing to do with the weapons
that is the government 's decision
they were to meet again thursday
said the spokesman
there has been no change he said
it has yet to give details of the plan
and i have n't found it yet
but he wants to play
a final decision is expected in three months
the man was shot in the head
the men declined to press charges against each other
i have immediate problems he said
police said there were no reports of violence
it 'll be a good game
he 's going to need all the support he can get
they are the players for the future
friday 's attack was the first of the year
that was his point of no return
we have to be on top of our game
then he did it again
things change he said
we want to get out
but that 's just part of the problem
he wanted to play but he could n't run
the judge did not return a call seeking comment
us we have nothing he said
this is our last chance for peace
but we ca n't change it
there 's no place like it
they want some action
i wanted to win it
they have the money and they 'll win she said
he 's made a big one before
he could n't believe it
it has n't been used
we planned for this goal
it was a very good year
one official was killed and two others were injured
seven people have died
they say they just want to clear his name
no she did n't win the race
she had two match points
there 's four days he said
i have the right to be here
what was the best thing about it
we ca n't do that he added
i do n't think he wanted to see me
i think she was great
they gave few other details
you got the first one
i 've never seen such a thing in my life
authorities did n't see it and did n't know whether to believe it when told
you think you 've got them but you 've got to get that last point
this was one of her good days
she added it 's just a show
these things are n't people he said
they will see their end there
a new trial is expected later this year
it was won over six months
he said it is still important today
that was rejected by the judge
the results were reported late tuesday
we would be a different country
results are not expected until monday
most were released tuesday
we just want peace he said
both countries agreed
nothing will change she said
i put my money on france he said
that 's one of them
they did n't give other details
it is not part of the problem
but we need to know the way
i 'm trying to do my job
a vote was expected this week
they were right there
first election results were expected monday
it 's a very major change he told the associated press
officials would not release further details
the talks include south korea the united states japan and russia
i do n't think it 's going to be a problem now she said
i want to be the peace president
we 've been working on that today
they have five children
they plan to appeal
that 's not the issue here
we believe we have a great chance
i hope she 's just in a hospital
i 've seen him play
i do n't think it can help him bush said
now is the time to work
the department declined to comment further
the were expected to appeal the decision
so he made a statement
the games end saturday
after all it 's been many years since women have had the vote
but that 's not final
still others want general elections
that would be a home run he said
all three scored last week
i would like to win but i just want to do my best
he wanted to control his future she said
we should start now
i 'm going to keep working on them
several people were injured
it 's been no problem he said
there was no fighting
and we have not been asked to do this
the last two are women
but you are without power
that would not do at all
several police were reported injured
that 's the plan and i think i can do that
i 've always thought it would be a very good fight
it was no big deal
you just have to move on
that 's the best part
she 's going to play more
it 's the best we could do
he is still on trial
some analysts agreed
first he appeared in
there was no immediate comment from the state department
he said he will appeal
but no decision was expected before next week
but he played a good final
we do n't need that
we will do it again next year
i just want my money
if we go to the united states we will be free to come back he said
men are always just like that
we 're going to need time
i want to be on top
he was arrested earlier this month
but it was n't without a fight
by then it was too late
he refused to name it
you ca n't play that way
you can use it in the future
i have n't lost that
the council was meeting to vote
they did n't get any
they have a life too
but there will be another time for this
officials refused to give further details
the united states and the european union already have a similar agreement
but that was five years ago
they were released the next day
she always believed in me
it was nothing like that
i thought this was going to be my day
but they held me for this long time
it 's too late for that the official said
i did n't believe that he says
the police spokesman could not be reached for comment
she was released wednesday
it 's much different
i do n't really like it but now i have a world record
it too gave no other details
by the end of the week that could change
but he gave in after a day
they have two children
the trial had been expected to last through the end of the week
now they might have
he just did n't want to do all those things
then there were local elections
he will never change
but it would have to be all the players
i do n't want to see it
the hospital gave no further details
but we 're not trying to win a war
no other details were known
now i know i must return
the government did not comment on the case
not yet the spokesman said
we 're going to get them he said
this is our team right now
the company said he died sunday
i ca n't get out of it
she was and still is one of the best
it did not name the other three members
his name is with us
this is our decision
there was no call on the play
it would n't be the first time
it did n't change all day
the defense ministry had no immediate comment thursday
it 's a new political force
foreign ministry officials refused to comment on the report
few people thought it would stop there
i 'm not the only one that did this he added
we 're not even close
three other american women also lost
there was no reported violence monday
today was a game we had to win
they just gave it to me
government officials said it was too early to comment on the report
we ca n't see that it would go back
i will take the job
so if it does that would be very good
we 'll try again next year
i wanted to be there again
the deal was never closed
police said they arrested five people
i hope people come to see me he said
others have been released
they have a national council
he was led away by security
united declined comment on the report
however it was not expected to be for long
but some say things may never be the same
it is expected to last for months
this was n't one of those days
i could never get them at all
we have n't all year
people ca n't believe that i 'm working out here she says
five men were killed and three were injured
its shares rose today
they need to do more he said
police declined to comment on the report
it should n't be such a big deal
we try to do our best all the time
this is the team we have
the police might come
israel has a good chance
it was n't working
i never thought that it would be like this she said
iraq is a problem for its own people he said
the race is not over
a deal will be announced later this month
the israeli army did not immediately comment on the report
she had no further information
this is an immediate problem
i just did n't have it he said
now they come to do business
it 's not a problem she said
it 's always going to help he said
we have to show this to people
but he had n't hit a home run
this election has nothing to do with us
yet his public appeal has not taken a hit
that meeting is set for saturday
it is expected to take two years
news reports said he had been shot in the head
i would n't want to put them through that he said
he later said that the death was not confirmed
no children were injured
seven people were injured
france is a good team
but he has his right to appeal
the three were arrested sunday
bush may be too strong
still he won the race
what was the use of all this
also they wanted to show they could do it
then they went out and did it
there was no chance for peace
he died at a hospital
six israeli soldiers and one palestinian were killed
but the president added
things were good then he said
you just have to continue she said
police refused to immediately comment on the reports
we need to have a president
i do n't want to have that on me
they gave us a chance
it did not name the others
they do n't come here
i hope to see you next sunday
she has no children
the french foreign ministry has refused to meet with the rebels
it was really important to us
we will do as they say
authorities would not
however that could change
i also share this victory
that 's another big point
the statement added
we 've been trying
the opposition said two people were killed
this state has been very good to me
i think that 's a good thing
and i did n't get to open up the show
he could even win the u.s. open
i know i have it in me
a french foreign ministry spokesman declined to comment on the reports
results are expected tuesday
the russian foreign ministry had no immediate comment
the final is saturday
no further action was taken
it 's a good place for him
i have n't had time to do that yet
he did n't name them
but that might change
he made no further comment
but our defense won it for us
it 's great to be here
however no time was set for their release
the attack is under investigation
i want to do different things in the future
they have to see me in my office he said
the final decision is expected in six months
he declined to name the bank
the army has denied that
i know it was the right decision for them and it was the right decision for me
not yet said the spokesman
i know it will end
we have a team that 's going to fight
i just want this to be over he said
then a man appeared
the company had no immediate comment on those reports
it 's not the first time
we had to do it he said
the details are up to the company
the military refused to comment on the issue
i 'll have to say i had a good year he said
he is also arrested
a ruling is expected this year
she is expected to be released tuesday
it 's great for our conference
we 'll have to see in the future he said
this is what we want
no one was reported arrested
she did not comment on the issue
he got a new one and went home
that number was n't known
all six were killed
i 'm never going to see my family
i just have to play my own game she said
but is it really the case
it 's played over seven months
after all it 's only been three days
but i did n't change my plans
we are one people he said
it 's the best place to play
the third is set for next week
they have to win two in new york
i do n't know what that is bush said
no problems have been reported
there was no immediate government comment on the reports
the united states denied it
it is now time to move on the judge said
many used to work in israel
that was a very important point
police have not confirmed the report
she said the case would be tried again
but really it 's lost
then there were more people
european countries
two other british men face similar charges
it just was n't the same
we just do n't have any other details at this point he said
and there is nothing to it
this is not for the good of the country
but we know it 's a long season and we have to continue like that
but there was no change for men
she left our home one month ago
some are killed as children
i 'm still going to fight until the end
the army has denied any attack on friday
there are things i want to do as a family
i could come up with those
it 's part of the military life
but she will be good
i hope the war does n't take place she said
i always hope for the best
you have to have more than one game plan
a third was injured
i will not be denied she says
many have not been tried
he has one strong point he can make
the administration came under immediate attack for its plans
it was like a new world
we have to deal with it this week
the others still are under investigation
it is clear this situation must change
a foreign ministry spokesman could n't be reached for comment
the best i 've seen them play
new york may have to help us she said
if it 's great it 's great
we should be in the final five
washington has rejected that condition
but for now this is the only thing i can do
it 's a court case now
but he said his country must make plans for the future
police did not immediately comment
i 'm going to the job
he wants to continue the peace process
but she did have some help
he was released the next year
there 's nothing to it
i do n't like them
his office did not immediately return a call from the associated press
this is his time of the year too
then they 'll come in
others would n't give details
he did n't immediately know whether they were injured
the israeli military had no immediate comment
and he 's all business
i just want to do my own thing
others are said to be under investigation
you want their money
right now is the right time for me
i can take a shot at the record
it has nothing to do with this he said
it 's about the same
i will try he said
two government soldiers died
russian officials could not be reached for comment
i just try to play my game
a win is a win he said
we know nothing about it
that is about to change
i think it was the right thing to do she said
he did not give further details
the official would give no further details
there are going to be a lot of good games
we just want him to show up and run his race
i 'm going to put up a fight
i 'll try and call you later
we will deal with them when they do
it 's always like this he said
last year we were n't able to do a lot
the company declined to release the second report
four soldiers were injured
i want to win that
i do n't have that information
four soldiers were reported killed
but that 's the end point
it was my decision
if i can take the lead i will
there is a long way to go
it 's the decision of the national council
they 're going to see him
life will never be the same here but it will go on
this is what we wanted
i think most people do
i think they must have been killed immediately
this has to come to an end now he said
it was my best time
it just was n't my day
he was expected to be tried before a military court
police would not release any information about the arrested man
a i do n't really think about it like that
you can not fight in there
now she ca n't get it out
i will come to fight
he is expected to start wednesday
he just played too good
at the time he was released
that report however could not be confirmed
the army is going to change he said
it was their own free decision
we can not not be here
and he might just get it
and if we 're not on the top we 're very close
the results have not been released
the united states is not one of those
you 've got security problems now
that would n't be the right way to go for me
the election is scheduled for saturday
reports did not give further details
they played a great game
that is too late to change the game plan he said
now his season is shot
it refused to release information
japan has four points
all three were released by an appeal court last month
this was not their first meeting
he did not return a call seeking comment
the official said he could not give more details
several people were killed
one vote may go a long way
but you ca n't take away one 's right to life
she refused and they went to court
the official refused to comment further
the results were announced thursday
if he did he would be killed
he said he would return the money
he added he had no further details
i just could n't do it
to that end he called for
i did n't return the call
even then it 's not over
we have a president now he said
business is business he said
he declined further comment on the case
they ca n't do what we do
further talks were scheduled for sunday
and that 's not his only problem
and i say you will not get in
i think it is a good plan he said
i think we have a good chance
she said she could not immediately release details
the army said it had no immediate comment
he said he will fight it
they have only been there for a day
police reported no problems
my game is not good he said
they 've got a great system he said
before this year he had never got past the second round
it 's a very important case
he also declined to give his name
they were good people
the season is long
this is one of them
it gave no financial details
he died six days later
we should have been scheduled on another court
this is our country
that investigation is still under way
you just have to play with what you have
it 's a part of life
it is not their only job too
it 's like a family fight
he came with his family
they 're part of my family
this team has a chance
there must be action
he has run a business
i think we 'll play a good game
the military tried to force me he added
it was not clear when he left the country
this might not be their last chance
it was their major
now that day is here
they all died on the day of victory
he thought i should
but i 'm going to work for it
i did n't have my control but that was the first time
i did n't know who she was
we need each other he said
the ministry did not return a call seeking comment
he was right again
it 's been a long time he said
i hope you are too
but police had no immediate report
each area will have different local problems
he also declined further comment
police refused to comment on the news reports
that 's all he said
and it is the second great one
at that time i denied it
it was not known whether he would appeal
the report did not name the countries
the administration 's plans include
then it was time for the show
we need to end this
they held their first round last month in washington
the group is scheduled to return thursday
we do n't want to have to do without him
he 's not going to back down from a lead
now he 's the best in the league
this is n't a house
we had a good chance but it 's not over yet
she died while being taken to a hospital
a final vote was expected wednesday
this is not a police state
it really does n't work that way he said
police said three people were injured
i do n't want people to get injured he said
he was arrested on those charges last month
i could do it she said
this is a great win for us
we need to win three
you 're still trying to make the shot
the government has denied this
i see this as a new part of my life
i do n't want to see it again
we do it because we want to one said
that 's not the american way
we should not give up
no such agreement was made
the three were not injured
they found nothing
the talks were scheduled for two days
that would always be great
they said they would try again friday
no one has called us
they called it the other way
no one was charged immediately
a police spokesman could not be reached for comment saturday
another was set for thursday
he had led since the second day
and that is the most important thing
we do n't know what it was
still it has lost only one of its last seven
if you like it you like it
it was a time of war
this government will continue she told reporters friday
the army said it could not comment on the report
federal authorities say more charges are possible
the council had the final say
but he did not give further details
he had no comment saturday
most people do n't want to come out he said
we could say nothing
the group did not release its plan
if they want us to fight we will fight
we 've got to give up a little business
but he did not show up
i took this as a race
however one group was left out sunday
but details were n't announced until monday
you just do n't see prices like that
it is great to come back
he said he had been working with his coach for the past three months
that 's all it is he said
we expected that decision
but japanese officials declined to release him
there 's no way we can take it away from them he said
their meeting is expected to take place next month
there 's nothing to keep him here she said
the party said in a statement
that trial is still under way
i just had a great time
the israeli government did not comment on the report
he really would n't
he also should have been his country 's president
no charges have been made
north korea attacks south korea
we will go for victory
most were from the local area
it 's been a good run he said friday
and some say there is still a long way to go
you are the future of the country
i really wanted that one he said
they are trying to make a show here she said
they want to be free
there was no immediate comment from palestinian officials
but we 've had a good life
he had been shot in the head
clinton 's time will come
however there is a long way to go
this is a victory long said
it was nothing to do with us he said
we did not have a good week he added
there is no other way to get in
i think it 's going to be a good match
you know it and i know it
one was killed earlier this year
he did n't need it all
his trial is scheduled for next week
a decision was not expected to be released until wednesday
he could not immediately be reached for comment thursday
i 'll keep working on it
there 's nothing we can do he said
that is what i said
there is still a long way to go
it 's good in a way
this is the time for peace
but it did n't stop him
but that is n't possible
he can have it all
i just have to make the most of it
three israeli soldiers were injured
the first match was played tuesday
this is a great day and these are my people
i really like this team
this was the first match between the players
but there 'll be a new party and we 'll vote for that
but it would have been great to win
final results were expected early sunday
a country is like a family
but that was the high point
the first results were expected monday
if that does n't do the job what 's left
it 's a very important win
i would n't want to win that way
the judge made no comment
it was not clear whether they would be charged or released
clinton said she has a record to run on
we 've got it over here
most are members of the ruling party
we know we are not going to stop the problem
the agency said the attack took place thursday
there was no comment from military officials
the company has declined to comment
we wanted to win for him
we have other players
i had great support from the other players
but that will not change the face
the officials declined further comment
i had the time of my life
it would have been the only way
he gave few details
one palestinian also was killed
i know nothing about it
four soldiers were also reported killed
the money is there he said
really we did n't believe it
we are going to do this
we thought that was not good business
i could n't see it from there
the israeli people have lost him
he had never seen her before
the ruling party did not immediately comment
i really should have won
do i think they can do it
they ca n't believe that
she was taken to a hospital
that 's very important to me
this year i found out
the game has been good to me he said
but problems continue
a day later things were much different
they have not been released
and they do n't like it
we will continue our investigation
i think he 's going to make it now
if they had n't there would still be war
three had died earlier
that was four years ago
you only take out if you put in
the group did not comment immediately
nothing could stop him
it 's always different he said
i think it is the best
they went out and got another goal
and they do n't have much time to do it
i have a lot of free time
we will open up the french market he added
they could not immediately be reached for comment
but they did n't want to give him a shot
the trial is expected to last several more months
the minister declined to give details
they were released friday
now we know there is a good price he said
and we can never stop working
but the judge rejected that
today i do n't think about him at all
it 's a big win she said
but i think we are
i 'll run the best race i can
and that 's not the case of other major countries
the hospital gave no further details of her condition
no one would give their name
i do n't have a home
that 's a name that was given by the hospital she said
he did not name the bank
new talks have not been scheduled
we need more help he said
the final match is monday
he gave me the match he said
we are a strong family
it just did n't go my way at all
we will not have to change that
he does n't have no record
there were no further immediate details
they were not going to change it
the official refused to comment on the report
the results have not been made public
it has been a family
officials did not immediately give any details of the talks
the problem is between us and the american administration
the israeli military declined to comment
we all had an even shot
i think it 's very good news he said
we 're going on with this with or without her
the others were arrested later
it 's not the first one he 's had this season
it is not clear if they will appeal
but i think it was a good way to start
so i think that was a big part of it
he is not the only one
i should have had that one
that 's going to help us
that 's not a problem
it could have been
it might come just after our elections
the man was taken to a hospital
i know from the past that she can come back
there was no comment on tuesday 's attack from the rebels
the final report was expected in several days
the army declined any further comment
then there was the money
i go because i 'm called
their trial began monday
the report could n't be immediately confirmed
he did not give more details
it does n't really
she did not have other details
we really need details
it was n't known when he died
government officials also could not be reached for comment
that is good he said
it 's like going to the office
it has got nothing to do with that he said
court officials could n't be immediately reached for further details
a press conference is planned friday for more details
but if it is n't it wo n't change
so that 's no problem
no one was injured in any of those attacks
there must be change
no one has been charged in the case
it 's been a few years she said
i 've got to get back to my children she said
it was not clear whether he would keep his government job
they are under investigation
the military has never allowed the parliament to meet
i wanted to get out there
a spokesman for the police force declined to give further details
no further details
that could take a month
it was put to a vote this month
for me it 's big now
it was the best start number in the world
here 's a chance to get two for the price of one
it should n't be an issue
i thought that was the end of my life she said
three soldiers were killed
the bank denied the report
japan 's foreign ministry told the associated press that it has yet to take any action
i ca n't do very much about that
but he wanted to know what would be put in its place
the defense department had no immediate comment
there 's nothing you can do
i have to do that again
now it 's under our control
it was not known if any police were injured
but will he be its leader
that 's just the start
that has nothing to do with it
iraq says it has no such weapons
it 's a race against time he said
we 'll do all in our power to help you
i 've never seen it
they were arrested tuesday
it was not known whether the two would appeal
it is still under investigation
but it wo n't get white house support
they were very good
but we 're not going to be there
things were going my way he said
now i see a future
he asked me if i would help him out
it might be my last one
she said she declined
that 's the big issue here
four were arrested
the state department could not be reached for comment
no i do n't like to see it
i just do n't believe in that
she 's not injured
and it may not be the last
but that 's the point
the men later were released
people wanted to come she said
there was some good news
if i play good it 's my day
some said they would
there was no immediate comment from russian officials
it is no different here
he said he would fight the ruling in court
the judge said no decision had been made
it will then become law
but that could change thursday
but i will win the war
i 'm going to hit three
but now we have a second chance
they 're still important to us he said
but i could have been shot
he will later visit south korea
i have not seen them here he said
it was a great three points he added
the united states is not among them
they did not and they are not expected to do so
but at the same time there 's a lot we can do
they want to be part of the process
but it should n't be
elections will really take place
i do n't know what my future is he said
i do n't know who it was he said
the report was released friday
local officials refused to comment
this was not a war
the judge took no action
he lost in the second round last year
bush 's first stop is japan
some will not come back
but he could not believe china would attack
we think we have a very strong case he said
it was a really big game
it does n't have to be government money he said
we have to do it he said
the clinton administration thought they were
the report could not be confirmed by the military
we are not going away
there was no time for that
the army said monday that no decision had yet been made
he said i want you to have it for the race
there is nothing to share
this is his third u.s. open
we just could n't help it
they were not taken to the hospital
it was her first world cup victory
official results are expected tuesday
he 's going to be there
he added however i think there will be peace now
its results were not announced
but we do n't plan that as a team
this is a very good job
and he can do it again
he just might be right
her condition was not released
he was released last saturday
they have to change
i tried not to think about it he said
i think he 's a great leader
i will just continue to play it
i 've been through a lot
there was no immediate comment by the government
this is show business he says
it may not be clear to other people
i did n't know them
they were taken to a local hospital
she wo n't change bush said
today can be different
it 's always the same thing
this is not his money he said
several players got injured
after all it was time to go
they 're the future
it 's got to be he said
we will continue until our final victory he added
but for this one it wo n't
it was the first known trial of any of the former leader 's family
the talks will end thursday
nothing is confirmed the minister said
court reporters said there were no further details
we want it to be played
what is the problem
it will be his first visit to japan
two others were injured
that 's a big change
i have had so many problems
he can not make it
there is no use for the u.n. she said
now they know they can
we can not comment further at this time
the process could take years
there are always people who do n't believe in you
no elections have been held since then
now 's the time to end them
but he said that decision was made before monday
they had no further information
the show must go on he said
they won the next two games
police said the attack was under investigation
but he did it with a plan
there is also other fighting in the area
is it going to take my life
that 's a long shot
you never know he said
final results are not expected until early next week
he released no details
however women do not have the right to vote or run for office
this year two will go
i should be president
they have just a few years
asked about his future plans he said i do n't know
i just want to make it
the official said such action might be taken later
i think we are going to be all right
he said all were killed
all the players know their own situation he said
the man was then released
they were later released without any charges
iraq has not allowed them to return
the government has refused to do so
but that will come
i just did n't do that
but i can deal with it
it 's now too late
there was no immediate comment from other nations
u.n. officials have made no comment on the plan
the united nation does not
he did at that point
the palestinian team has little money
she said she did not know the man 's condition
police officials refused to comment on the reports
there is no immediate government comment from the government
his head has not been found
we 'll still have a good time he said
it does n't have the support of the united nations
and it 's important for me
he said there would be another meeting monday
he was released without charges
i 'm think we 're good
she does n't think she will try again
the case is under investigation
police have declined to comment
it has nothing to do with us
the race was run two days later
you 've still got to put it in play
she is not charged in the case
i did n't want to end like that
it 's a lot of work
official results were expected later this week
we have to he said
french officials have declined to comment
but this is not the point
but five days later he announced he will fight again
the results have been the same
will you run for president
south korea denied the charges
that too was denied
we could not use force
it is expected to make a decision before the end of the year
japan has 10 points
we hope others will do the same
they should 've told me
the men were released after three months
i 'll be the first one she said
he does n't know who they are
the two countries have denied the reports
after that it was all business
by sunday it was under control
the security council is expected to take up the issue next week
this is what is called a political trial he said
it should be a good one
he declined to name any of the men
take me away from here
still it had some big problems
no one has been arrested
and we 'll deal with it later
but they could n't set it up
the spokesman 's name was not given
no one was injured and the five were arrested
that was one of my things
he called general elections
but it is n't in force yet
it could take years
campaign officials refused to comment
we got the first one
he declined to comment monday
i just do n't get it
nothing is given yet
but money is n't the issue
you ca n't take that away from him
both men were arrested
they could become final after that
no violence had been reported
police also refused to comment
the final is scheduled wednesday
each match is different
the power went out
he can only hope he does n't end up like the others
the government has not confirmed such reports
they were released tuesday
two others also have six points
palestinian officials denied the reports
news reports said several people had died
british police would not comment on the reports
and they killed him
he did not comment on the talks
people are close here she said
the final is sunday
you have to deal with those things
police would not give any details about the investigation
we do n't need that money he said
she died three days later
he finished with six points
from there he could n't get close
she had not yet been charged
this is his last chance
but the fight is n't over
the french team is
i 'm not trying to hit a home run
the war was going on
it 's very different
the group said a decision was expected next week
the players come back the next day
can you believe that
that 's a lot of money
i did n't get to play that game
the stock market closed
i just wanted to see them he said
she had to work at it
government security officials declined to comment on the statement
but i also think there are many of the same problems
we never did and we do n't now
that i could n't do
the president asked
but the most important thing is to win
it must not be allowed he said
seven were arrested
the power went to his head
this is the first game
it 's just the way i play
and many believe that will never change
but they should n't take it out on all the others
but they wo n't have their way
it was n't clear when the children died
i do n't want to go to war
i 've never seen it before
he will always be that
but it 's a great thought
it did not name the company
for me that 's the most important thing
we know the situation
police did not give his name
there are other problems
he too was asked whether he would be back
and i do n't like it
police denied the report
he finished with 10 points
authorities confirmed the report
the report gave no details about the talks
but that may not take long
and that was n't always a good thing
they have denied it
all five have denied the charges
this american told me that i had seen many things
that 's not my thing
and they will win without me
that 's one of the big things
the president was n't bill clinton
she never wants to go back
it is clear he said
a united nations spokesman could not be reached for comment
the two wo n't be tried until may
there was very strong support he said
he has not been seen in public since saturday
house members are working on their own bill
but this wo n't keep going
still two months do not make a year
one official said that might take three days
he was never found
but this was the world cup
he is a man of action
washington lost for just the second time in 10 games
and if they come with us and vote with us we will give them back their country
it can not be used
nothing is confirmed
do you support that
the official also declined to give other details
little is known about the rebels
it 's not the same she said
we were part of his party
the trial began a week ago
the clinton campaign had no immediate comment
the government will close that day
sunday 's vote went off without reports of major violence
some are still fighting
results could take several days
i just ca n't believe that i did that
i just had to get out of there
i will be back she said
it 's like it was n't a job
he wants us to get out
no violence was reported during the vote
she died that year
this is the final year
they were great games he said
he did n't make it out
the talks were expected to continue until friday
i came here with nothing
he did n't have other details
the president was asked
it 's life she said
she did not know him by name
i have not taken any final decision
i will be under the law he added
day could not immediately be reached for comment
it was a statement
and try again next year
the team got on with it
i just wanted to be out of there
we 've got to give it time
he was arrested late last month
he 's such a good coach
final results were not expected until thursday
there 's too much violence
that 's the way i wanted to play
people really do that
they were released early this month
that 's my program
children do n't have any problems
it had been for a long time
they do n't work like that
i 'm in the second week
officials said they had no further details
i hope to do it again
the trial will likely take months
she asked reporters
the man was n't immediately charged and police did n't release his name
is another world cup win next
i think i can make it
no vote is likely before thursday
but i 'm not close
the final race is saturday
they do n't think of us
but there is no agreement on that point
and he was n't the only one
china will be the second market
do you think that 's a way to take back the house
if it 's good i can continue
the report made these other points
we should n't have to
it 's like i 'm a part of the family he said
i 'm not saying that
they said we 've got her
but it 's not possible now
the four were taken to hospital
now we 've got to make it work
and she will do one other thing
she said she did n't know what was found
it 's not that they could n't come he said after the meeting
authorities declined to comment further
it is seeking nuclear weapons
then things would get out of control
that court refused to release him
this is good he said
both countries have denied it
there have been a lot of problems in the army he said
he wanted me to be a leader
israeli police officials refused to comment
but i do n't think i want to stop
the hospital declined to comment on saturday
the report gave no further details about the other two injured children
no one was injured friday
but washington has taken no action against russia
court officials could not be reached for comment late wednesday
the trial had been scheduled to start monday
i want to know more
he was later arrested by police
i wanted to change that he said
and he 's had only five games
they have a really good one
the deal fell through
our work is with people
the white house may make the final decision
she said she will play for two more years
the agency said friday that the election would take place
in the end he took the job
his trial is set for next month
i ca n't go back into the house
a victory would give him four more years in office
u.n. officials had no immediate comment
he told me i can call him any time
there were no other games thursday
government leaders
we 're the best team in the nation he said
i ca n't believe they did that to me she said
official results were not expected until monday
he took off and was never seen again
there also was one trade
the talks also include the united states south korea japan and russia
there is no need to fight he said
he also was their last coach
and i had the last out
it 's never been free there
and they are n't through
i do n't see the big deal
i would have reported it she told reporters
it did n't work right away
six have been killed
i 've won my share this year
i tried but i could n't do it
it is always the same
he had no other details
local police could not immediately be reached for comment
you 'll never work again
so they came to help
it has always been the case
this is the most important thing
things could n't be more different now
it did not give the name of the company
i do n't believe it he said
it will become clear during the council 's meeting
the police had no immediate comment on the report
there was no comment from authorities
there is no more money
i reached that point
but it 's going to take a few days
i thought i was going to win it
nothing was working out today
it 's a different situation he said
i 'll take that deal any day
official results are not expected before monday
the lead company was not announced
most have been released
it 's his name on it
i 've been working
there is no such country
the defense set up the next 10 points
that will now stop
the meeting is scheduled to end friday
police could not be reached for a comment
you ca n't just show up
there are other immediate problems
it always has been
it 's free he said
i do n't think that 's the right thing to do he said
i 'm not going to make a decision now
i ca n't have them
i would n't change it
some people get it
final results were not expected until the end of the year
but do you see that
they never were charged
i think it could be he said
he 's always been a leader
that 's the way i do things
i had a chance to make the team and i did n't do it
two were released last week
it later announced they had been killed
they use them and are used by them
that game was also won by the united
i 'll make it up to you said early
police refused to comment on the call
that report could not be confirmed
i thought it was great
if they give it they will get it he said
that has not been the case this year
he declined to give his name
i 'll do those things more the next time
court officials have refused to comment on the case
court officials could not be reached for comment
talks were scheduled later tuesday
you have to help us
now they have to move again
the trial is expected to last until next wednesday
but if i ca n't i wo n't
clinton said friday
all the men had been shot in the head
several have tried
you have to play with it
there was nothing you could really do on the goal
this is news to her
korea is major market for the eu
people are free to believe what they like
the officials gave no further details
he used to give in
we 're not here to do that
i got to the last stop
his trial began monday
all three have denied the charges
the vote was expected to be close
but for many others the problems continue
the best team 's going to win
and some hope he 's right
and they told me you have to get out
it 's time to play
i hope this will change my future he said
a win is a good game
and it 's the right time
this one went high
the decision was made by the group 's national council
it 's not the way we want to win
the investigation was on
i can and i do he said
this could also be the case here she added
the war is not over yet she said
others said they did not know
police say an investigation is under way
we 're not going to be used he said
it 's too close she said
it did not name the hospital
a final vote was scheduled for late thursday
it was a good win for us against a strong team
we 'll have to see who it is
i just had to believe that
military officials agreed
he did not meet with reporters
that is very important he said
we have no other way to get home she said
they did n't make them in those days
that 's not our problem
the three companies are under federal investigation
this is the only place i know
but that would n't be the way to do it
others never made it
israeli authorities refused to comment on the case
i think that 's a big thing for me right now
both could use a hit
i do n't see any problems he said on thursday
he has been for a long time
the president has denied the charges
u.s. military officials did n't comment
it does n't end there
for its part the white house declined to comment on the situation
get a new director
we do n't need to do that
he said it would not stop him from going
now i want to get a start
the army said many rebels were killed
they can stop a team when they have to
the soldiers were tried in a closed military court
but he did n't do it
it did not name the members
this did n't change that
the council is expected to take up the report next week
it just did n't work
i want president clinton to know that we do n't want his troops here
the united states will continue to do its part to support the peace process she said
now i can get on with my business
and that could lead to big problems this week
he had good control
we have to do what we do
no details were made public
the government just did one thing after another
you have to keep on
the company said it had no comment
he did n't release more details
israeli officials refused comment
it 's got a lot of problems
i say there will be peace
and there is a chance we might not be able to do that
you 've got to go on
i 've never had many of them
and war is what they got
this is nothing for him
the government did n't comment
a ruling is expected friday
this one has got my number he said
he added i believe them
you really do n't give it a second thought
the company was also accused of
and the show is over
people wanted to vote
is it going to take time
they want to do their thing
the government is going to need all the help it can get
there are more players
he was released saturday
but he added that they never asked the federal government for help
it 's really really important
the appeal could take several months
and now we 're left with nothing
i thought we had good plans
i did n't even have to think about it
for us this is very important
i need to see it again
the hospital also refused to release any information
i 'm trying to do the right thing
final results are expected tuesday
i have n't had all that good of a year and he 's had a great year
it will end friday
no further details were announced
but there was no need for that
he would not give any details of the talks
he died early friday
she asked for an investigation
this is very important to us
they have a great team
there 's nothing to see
this is not good news
financial details were not given
it was n't good he said
that will change now
i do n't think people would do that
the reports did not name the man
two other federal soldiers were killed
i want to go to france
but he left the party earlier this month
she does n't plan to stop there
another six were injured in the attacks
this is what the soldiers did to him
but that would take many years
the hospital declined further comment
he said union members would meet later friday
that is too much power
that is the big problem
it did not give any further details of the visit
and these countries know that
we 're trying to get away from it
my family had no money
we hope it will be a good start she said
i do n't do it for the money
government officials said the attacks were political
british officials would give no details
the man has problems
i 'm too close to it the man said
he was trying to do his job
company officials could n't be reached for comment
he did not get a decision
all were shot in the head
i just can not do that
it was a good thing to do
that might take a while
no one 's going to stop us
and i got two of them
two people were injured in the house
after that it has never been the same
the world cup is no different
he has denied the charges and is to face trial next week
it just wo n't work
the state government had no comment
they have to get over that
all i can do is my best
in the final set she won six points
that 's all they did
this is not a good start
it 's really great
russian officials could not immediately be reached for comment
but now is not the time for one
thursday is an off day
this is my life 's work
they 've got weapons
it just is what it is
i wanted that money to help my family
they say it 's not by chance
do you believe we can become one nation
they include the us and japan
police said most of the injured were women
but i have to change
i do n't really want to be part of this at all
it 's not the one they want
but there 's a long way to go
there was no immediate israeli comment
they ca n't stop us
police did not return fire
we 're international he said
to him the important thing was that he won it she said
israeli government officials refused any comment
it 's part of life he said
he said most people had left
is there any future for peace
he is expected to start
the government 's decision is not expected before monday
the race is sunday
he refused to comment
another two were released without being charged
so that 's always going to be
seven military men were also killed
the trial began six months ago
city police declined to comment on details of the case
i would say this is a process that would take a while
that would have been important
the house is scheduled to vote wednesday
but i 've got to do it
might is still right
the group has denied her charges
police closed off the area
all of us have a past
it 's official today
washington should know
i want it back he said
i think we can get him he said
now he 's the country 's new president
still bush refused to release the money
now we must use them
it 's like any big game
police could not immediately be reached for comment on the report sunday
the government has denied that
they are going to make you work he said
no new violence was reported
there 's nothing we can do about it now
i hope that they wo n't do that
she says the process could take two to three years
she would n't release his name
there will be more
for now she has other work
they do n't fight us
he already has won 10 of those
but i was n't going to stop
it did not say whether it would appeal
no american soldiers were injured
she could not immediately be reached for comment monday
we 'll deal with it again
money wo n't change that
we 're still fighting a war
he would not give any details about the company
no immediate decision was made
i wanted to end it
but the u.s. action did get some support
he does n't need to work
there is no one who will help us
and he wo n't give up before then
they were expected to be released later in the day
there was no immediate u.s. comment
you still have a second chance bush said
i think it 's the best time to go
they were also taken to hospital
but it 's just a fight
people have to believe that
it does n't always work that way
they will take it over
and then they 're clear
i want it to be good
most states already do that
she does n't want to see it
the man fell down immediately
the two injured people were taken to a hospital
the case is expected to last five months
france led opposition to the war
it did n't name any of them
but no other israeli action was reported
he got some help from his players
but you said we would go
russian officials denied the report
that is not going to change
they have never been charged or put on trial
military officials could not be reached for comment on sunday
the council 's spokesman declined to comment
government information
the case is expected to last two months
official results were expected monday
but we can be the best
they refused without comment
i could n't believe he did it
in washington an administration official said no one was injured
i said you do n't want to know what i think
however he said the decision would be made by the palestinian national council
things ca n't go on like that
i do n't know what the deal is
if it 's a problem people would meet
but this will take time
the ministry said it could not immediately comment on the report
but is it different than any other company
we do not want this
there were no further details on his condition
he 's going to be here
he gave no details of the plan
the men were arrested after the meeting
he had no information of the results of the attack
the china show fell through
he still finished third
i have a lot of money
most were released late tuesday
now she wants to take on the men
it could be the american people
we have no security
he made that decision
they have denied the charges against them
the u.s. has already refused
this is not the time to give up
it 's part of the job he said
we ca n't keep them all he said
the first round was held last month in washington
it was n't the first time
but things did n't work out
there 's no nothing
official results were not expected before monday
it did n't give the price
i think i would have a good chance he said later
results from sunday 's elections were expected monday
this is a decision that will be taken next tuesday he told reporters
i just have n't scored at all
the judge rejected those
he said the decision might not be made until tuesday
he is expected to be released after 10 years
i do n't know she said
the government gave no further details about the case
they have a strong team
i really wanted it he said
four soldiers have been killed since thursday
the results have not been announced
we 've got to move this case he said
clinton 's political campaign
that will take time
he still did not know the man 's name
the company declined comment thursday
we need to win this next game
i need my own time
they 're not that many people
he 's the leader of this team
but the report said washington had no details of the program
i 'll just deal with it
i want her to do great
i think there 's a good chance i can get it out of my system
it 's going to take me time but i will do it
that 's when i played
there is no other way
it 's going to continue to be
it 's very important
it will take time he told reporters
they released no further details
three women were killed
but he 's got to fight
that will be known later this week
i never think about it
you did not give up she said
both were then released
still things might have been different
but it does n't say that
it 's going to be a big match
a hospital spokesman had no comment on his condition
stock prices also fell
i do n't want to take too much time off he said
his release is not expected immediately
i do n't have a job
you still have a second chance
the start was good
do i think i should be here
it was a great day for us
she denied that family members had left
others say there are more
and said they were
it was a good match
but she wants to do it her way
a decision is expected next month
we are not the show she said
we have got to plan for the world cup white said
the report did not give more details
those plans however fell through
it 's part of the job
he said he did not plan to meet him
he said who 's that
i 'm in my own little world he said
but that may not continue to be so
those reports however could not be immediately confirmed
he did have some help
i did n't want to have a job
we have had a great month
if that 's the case that 's great he said
for now we are the other iraq
both appeared in court friday
it 's their number
we do n't have to do that
he said just give it a run
for me he was great
there is no chance that we will give up on this
i did n't have much time to think about it
there was no way i could continue
it has to do with political power
he refused to comment on details
it 's not a game we can win with our defense
six people died then
he has denied all charges
that war must be finished
i 'll go and have a good time
we do not believe it 's being used she said
his trial began a week ago
four people have been arrested
the defense team also declined to comment
there may be one or two he said
it should be all right for us
two women were reported injured
i just want to see it
the authorities did nothing
we were a great team of players
i want him to see my face he said
government officials refused to comment on the report
israeli police refused to comment on the case
i have to do that he said
it was no war game
it did n't have to be
he had just finished a show
no one has any plans for that
the u.s. military had no immediate comment
i just wanted to do my part
the who has a long way to go she said
a third round began thursday
many other injured were also found
but it 's too high
it 's an area we 've been working on
some people did n't come
in washington a u.s. official refused to comment
i got that for a while
her name was released
that 's always been our goal
now there was a man said back
the talks will be next month
the report did not name the spokesman
it was only the second meeting between the two
police said five people were injured
i expected to go all the way
it 's a national problem
there are still a lot of problems
the report has not been released
that 's going to get me through all of this
that process will take several days
he said the appeal process could take months
but i will be there
but she was shot in the back
i really wanted to go home
if you want it you can use it
it will have to do
he said no decision has been made on a possible appeal
we want to see you
u.s. officials could not immediately be reached for comment on sunday
i do n't know that today
it 's been good to me he said
they just do n't think about it
it may not be the next game it may be next year
i think they are going to get it she said
there was no immediate comment by the state department
there were days he did n't even show up to the set
it 's all we 've got
the agency did not give her last name
three police were injured
he declined further details
sunday will be their season he said
that 's one thing i 'm trying to do
i really want to move he said
that 's the way it should be
i 'm not going to play that game
we do not support that
and we do n't want to do it
then it was time to go
i 've never seen such a thing
but it was a good week
no one has lost their life
nothing is going to be announced today she said monday
we 're going to try to do it he said
but they found no one
they were good people he said
no violence was reported there
officials could n't immediately be reached for comment on the report or further details
two other u.s. officials also died
the company declined to comment on the decision
the reports said two people were killed and two were injured
i had a chance to make that point
both men were killed tuesday
so do other top players
i did n't think i would get that close he said
results are expected in the next few days
we 've got a great group here
however there were no immediate reports of violence
they did n't have to
you just want to do it
for others it was about business
this is a great job
it was a long game
it was some statement made by the coach
two children were injured
i said to take one
others never even got that close
he was arrested monday
it 's two different games
we want to give the problem to the government he said
i always thought it would be a very good fight
the companies declined to comment on the report
the market is important and we have played up to it
he just wants people to like him
north korea has denied the reports
i do n't think it 's a big deal
parliament is to take up the plan this week
he did not say whether the department would appeal
that was the shot of the round
we just have to play our game
we had some great great games
the other companies were
but what can i say
the spokesman did not give his name
also announced at monday 's meeting
others are planned
this support is really important he said
that was the good life he said
they are not being held during the trial
financial reporters
but no further details were released
they had our number
but we could n't control it
this is a political problem
a police spokesman declined to comment saturday to the associated press
he said he was n't
many came from the united states and israel
no violence was reported early sunday
we need to be right
there 's nothing like that
the were scheduled to meet later tuesday
no one wants to work there
but they know who did it
the state has money he said
he only had one record
he 's had a good week
we did n't want that
but it was for a while
he came back to play in the third
the conference is scheduled to end friday
i want to fight and i will fight until the end he said
we won the first race of the season and we won the last race of the season
it was already too late
there is no campaign
but if he does n't do his job he 'll be taken out
the court did not make an immediate ruling
we must work to change this
they were trying to get out of there
we 're both good players
he will be lost for the season
we do a lot of the same things
the russian foreign ministry refused comment
the company had no comment friday
things did n't end there
the council could not be reached late thursday for comment
he did n't give his name
he 's always got a chance
it is known to all of our country he said
it could do it again
it 's a good chance for me he said
if he thought it was right it was right
police did not immediately comment on the violence
the money is palestinian money he said
washington has denied it
they have got some good players
we know that you 're one of us
they will also meet with reporters
that 's the great thing about it
it 's been a long year he said
two other games were scheduled on sunday
there are three days left in the year
they told us this is the palestinian state
they are saying there is no problem
we are going to meet him again
the two men were arrested last month
she finished with three points
no other u.s. state has such a law
u.s. officials have called for his release
this is a free world
it was a good week she said
but he refused to say more
it was a lot of work he said
but in her house it was different
no time was set for a parliament meeting
the israeli army confirmed the attacks
the israeli foreign ministry had no comment on the report
all three rejected him
i had to do that in the past
he said you know me
we do n't need this
he would not give details
we do n't think it 's a big problem he said
they go to the hospital
the japanese foreign ministry refused to comment on the report
the left attacks the left
but i do n't get it
first results are expected late monday
he was not scheduled to play
she was released from the hospital last week
the final is set for sunday
several people were reported injured
official results expected monday
i did not say what i thought
israeli authorities however later said they had made no decision
she was just too strong for me she said
are you against children
it would be their second meeting this week
but we were the best team
he did not say who made the call
i 've got a chance
its report could not be immediately confirmed
a decision was expected thursday
do n't know he said friday
she had no immediate report on their condition
there 's part of you there he said
results are expected to be announced thursday
there was so much fire
i was one of those people
one can not say that he said
it 's the government
and you 've got to move on
he does n't believe in them
now he has the chance to say it in court
they then released him
he made two points
six others were injured
that 's the only change
in a way he was right
that 's the only way it could 've been
that was win this game
the government has refused this
it made these points
the rebels however say they are not finished
party officials could not be reached for comment
he had been arrested tuesday
this has been my best year
the vote had been expected friday
we 've got to get three points from it
both are believed to have died
we will never know
he did not comment further
in washington there was no immediate comment from the u.s. state department on thursday
he was arrested wednesday
other officials could not immediately be reached for comment
the three women were killed this year
these people know each other
but it has given no number
i 've got to change
they are and it is
the council was expected to take up the issue again monday
this was just a show
i call it the clinton bill
it was his third victory of the year
he declined to name the countries
a government spokesman could not be reached for comment
are you the police
to be known he told the associated press
now i have a good chance
official results were not expected until friday
nothing was taken from the house
there was no immediate comment from israeli officials
we could n't believe it
i do not think we need to go into all that
we can never be like we were
i think that is what we got
it does n't work for us
the white house did not immediately return a call for comment about the change in plans
state officials had no immediate comment
we ca n't change that
five people are killed
it was one thing we can do
he just could n't get going
he could be out for six games
he died before he got one
but this was denied them
it 's like the stock market he said
the united states has appeal against that ruling
he also released them to reporters
a few people got it
we are their home state
the last major fighting was last week
three men have been charged in the attack
this is just thursday she said
i did n't know i had
a vote is expected
i could not do that
the rebels did not immediately comment on the attacks
another meeting was scheduled for thursday
the meeting was expected to take place before monday
two soldiers were among the injured
he then set up his own party
that report is expected before the election
i made a decision to go for it
the army does not have control there
we were only children he said
they are also among the last
that 's the only way you can get through it
if i did n't like it i would try again
but you want to do the work
it 's not that way now
money was not the issue
they do n't know what 's going on
give us back our peace
so she is still a part of his life
this time we have to do it
they were shot in the head
a vote was expected wednesday
two men were arrested
i 'm going to take it to him
nothing is closed he said
three soldiers were also killed
but if i need it i 'm going to take it
we think we did that
it will at the end of this year
i had to go for a win
if we win the final four games we can take the league
few others see it that way
the injured were two men
first results were expected wednesday
the group planned to try again friday
he did not name the team
other reports said seven had been released
it 's just the right thing to do
it 's not the same
but they 're really really good
from my part i play a great match
u.s. officials later denied the report
he scheduled a news conference for tuesday
the japanese market is open
it can be the same
the vote is scheduled for saturday
i hope we can do it
we just want them to stop
they ca n't take it he said
she did n't get one
the problem is not new
she refused to give her last name
but other officials said no decision has yet been made
we do n't want them to have them
five percent did not know
all those things help
i believe i do want it she said
he has so much power
so we do need to be different
you do n't know he said
i have nothing against the coach
but if it 's not right i have a great job
the soldiers shot back
i did n't know what was going on
are to be played sunday
later he confirmed it had been reached
she always has been
this is the will of the president he said
i do n't want to see her again
this year it might be different
i think i need some time
he had no other details about her
i have to go back he said
he plans an appeal
monday 's group was the first to go on trial
you ca n't change those things
it took a long time he said
an official said at the time the man had asked to see president clinton
you have to win she said
and she 's going strong
i think the plan will work
now i know i can win
he did n't give more details
they only won one game
but i should n't have said that
i have the right he told reporters later
we 're not going to trade him he said
but because he 's the coach he 's not expected to take days off
it 's a thing of the past
he refused to comment on the peace talks
he could keep up with the best of them
he 's not going to back down
that would likely lead to violence
palestinian hospital officials said two people were killed
authorities did not release his name
it 's not like that he said
we were able to do what we wanted
but i thought they would be
i had never seen them before she said
four others were arrested earlier
the political decision must now be taken
we 'll give it to them
the team declined further comment
they did n't give further details
officials there could not immediately be reached for comment
this is the big one he said
that is not a life
i did n't want to do it
you 're the future now
we 're not just players
that would be good
more fighting was reported wednesday
and he said i think we can do that
you ca n't say that
if i 'm not one of them i 'm not one of them
it was her second victory of the season
it 's only been five days
there was no official comment from authorities
their appeal was rejected last may
it 's not like he 's not going to get it
the process could take up to a year
i do n't think they will
i would like to know
u.n. authorities declined to release further details
it 's because there 's a problem
we are going to win this thing
however no agreement was announced
but it was a start
no violence was reported tuesday
no european has won the u.s. open since then
i hope he can make it
there is a major problem she said
the future party has one
i wanted to run under the world record but it would not work he said
there is hope for us
but most said it was a start
then came the new bush administration
and i think he will
family members could not be reached for comment saturday
he could not be reached for comment today
there was no immediate government comment
i hope so but it 's a long year
they 've never been in that situation before and that 'll be different for them
rose 's was a great one
that group did not return a call for comment
we 've set you free
there was no immediate comment from the government
i hope to have a good race she said
we have no comment
the attacks were among several tuesday
the talks were expected to continue through next week
financial details were not made public
the military had no comment
it is a great team with great players he said
i 'll know what i need
police have declined to comment on the case
she declined further comment friday
its report is not expected until late next year
he gave no further details about the deal
we know we can win there he said
people are going with what they know
the number of attacks has declined
but no action was taken on that tuesday
that 's the decision they have to make he said
i do n't want just one thing
she agreed to return to washington
both said they did it first
we do n't have important political problems
they did nothing he said
this is election season
but others are n't
now he 'll try to do it again
foreign ministry officials had no comment
now we hope to take the cup home
u.s. officials could not immediately be reached for comment thursday
he declined comment wednesday
our goal is victory
she declined to comment monday
she wants to be the best
but there was general agreement with the decision that the games should go on
on tuesday he had another chance
now he wo n't have to
he had no other details and did not give his name
the talks are expected to take days
i 've been told a lot of things by a lot of people
no other games were scheduled
it 's the right thing to do he said
i 'll vote for him
it will even back out
i believe i can do it
i want to lead the way
things are different now
i need some days to think about it he said
it 's a business decision
that 's all i 'm saying
i have to take this like a man
so she 's all things
who 's the most important in this thing
but if i ca n't do it i ca n't do it
she just played a great match
i think a few others have
most had been released by tuesday
the office would not release further information
we can not continue in this way
the police department also declined to comment
he had not been charged
french police had no immediate comment
it 's been a good decision by both of us
members of the working group could not be immediately reached for comment
he told a news conference
but there 's always next season
the talks also include south korea and russia
her trial is going on
i think we would have had a shot at it
they 're going down for good
we might not like it but we have to deal with it
and some will like it and some wo n't like it
that is all he said
however that is not the issue
they do the same thing
little is left to chance
there is good news
we just do n't know who they are
i had big problems
u.s. officials say that vote could come as early as wednesday
we used to have the best
there 's nothing really final
i think it 's the race he said
you want to keep on going
her condition was n't reported
details were not given
but this is the u.s. open
there 's nothing you can do about it
he 's come to get you
there have been similar attacks before
there 's no time she said
these are good people
that 's the thing you can say here
the last one came on match point
they do n't want to go to war
officials confirmed the reports
the other match is too close to call
it also allowed some others to go to third countries
it is not the first time the team has come up against political problems
two ministry officials have been arrested
the government did that for us
they were released last week
but it 's not the same
he also said there were no plans to call off the game
they have been rejected by the government
they were likely to be released later friday
that has been put off until later
i did n't know i could do that
it was allowed to go on its way
the country must come first
we will never win he said
it also refused comment on saturday
the two were set to meet next week
we thought that was a lot of money she says
you never see him but you know he 's been there
it 's always the same thing he said
i 'm trying to keep my head high
she has not given details
we also thought of security
you just have to see it through
he does n't need it
it gave no other immediate details
this is our country he says
they are part of the problem
i do n't want any more war
it 's over 10 years
and now it wants the u.s. government to do the same
it had no further details
that will be the last time
and he 's a great leader
government officials could not be immediately reached for comment
you 've made money
that 's what he thought
he said he wanted to see results first
we believe they will
he has denied that any attack was planned
you just do n't know on what day
army officials had no immediate comment on the police investigation
the trial is scheduled to end next month
and that 's at the end of the week
i never said i was never going to play again
we 've got a great team
that 's a decision for others to make
it 's been a great week
he said he did not think there would be a u.s. attack on his country
i really believe they will
it planned another meeting monday
but we know who we are
i did n't get hit he said
his trial has not been set
final results were not expected until sunday
the vote will be held late sunday
the last was seven years ago
i could n't deal with a coach she said
i played and we lost
a white house official also confirmed the deal late friday
if we did n't win in the first round we 'll win in the second he said
they both are also members of parliament
we want to do the right thing here
you can not do nothing about it
it is not a good place to run he said
team officials reported tuesday
this should not have been allowed
just did n't think of it
we are trying to make it
all i want to do is my job
we have one russia and we must be united
and there are other things
we 've killed a lot of their people
but they 'll take it
we only want a country that also wants us
this is the law of the state he said
he said in a statement
the information could not be immediately confirmed with other government officials
japan would never be the same
we will fight them all
we should give it a try
she would not release any details
it 's an economic free trade issue
we 'll give it our best shot
i found another job
i think that 's good
he has not said whether he will run for president
they have n't found it but they say it just has to be there
court officials declined to comment on the report
we have a long way to go he added
that money may now be lost
the report also did not name a price
we would hope to keep it out of court he said
he said no decision has been made
this was n't our investigation he said
i wanted to say that and i wanted to say that to him
it will give hope to the area major said
we have n't lost hope
this was said in the meeting
the season 's long
their job now is play
but right now he has to give that to us
there 's no long season now
you ca n't play it down
there is nothing left
he said he could not comment further
if i could do it again i would show up he said
now i try to give it back
that 's not the way for a man to go in the military
no one called back
the army however said no one was left
the opposition wants early elections
i ca n't do this today
results would be announced later this month
they did and still do
they had few other details
this should take place before the end of the year
state police had no comment on the report
it was not working he said
you own the right to use it
i support people who support me
we know who we are
i always believe that
for the future i can see the move they made
we know he 'll be back
there was no immediate information on whether they were released
i do n't know the best way to do it
he however declined to give more details
american officials could n't immediately be reached for comment
the government did not comment on his death
the final round is sunday
this is our new president
sunday 's election was too close to call
police would not comment on the attack
it really would be
it will be the last time
the problem is the market
he wanted israel to have peace
a company spokesman had no comment
officials had no comment
an early decision is not expected
and for a while she did
in that area he is as good as they come
it did n't work out for me
can she keep it up
he did n't always win
i hope that peace will
sunday was more of the same
and that 's not good
few believe that money will be found
we 're working to do it
we 'll take this place back
they ca n't go home
they also work in many other countries
he was arrested on sunday
and some are being killed
but it was a great great week
officials refused to comment on his release
which is what you want
two others went to hospital
the report could not immediately be confirmed
this is not our work
they do n't know him yet
another took his place
that 's not our business
and business has been good
that vote is set for sunday
i think it does help
he was an important man who did good things
it 's never going to be the same
the next one was good
the five have not been charged
but that was his last point
this is the second report
i asked him to help me
the authorities refused to give any details
it might be the only chance he has
the hospital would not release any other details
he refused to comment after the ruling
and if i was n't going to get into the game you just ca n't help that
police had no further information
it quoted the minister as saying
i want him to play
the talks are expected to last four days
it may not be the final results
the foreign ministry denied the report
the players have been charged
the four were arrested tuesday
there will be another good coach
the thing is to win the important games and we did that
no ruling was expected before next week
they 're a final four team
it was his second world cup victory of the season
he should have been tried here
i could n't believe it she said
news reports said the decision would be made by friday
they did not want to make that information public
now you ca n't do that
people from new york did n't come
and that is my third point
now she is no more
it may not be over
we want to be part of that process he said
they wo n't have to
it 's good to be back she said
there are a few things you can do
a vote is set for later this year
it gave no details of the talks
and i have a strong new york record
his family is with him
i could n't take it
now they know they 've got hope
the elections are expected later this year
you try not to think about it
israeli officials refused to comment on the report
things are going great
they want the office 's power to be set in law
they did not release her name
but would they try
it 's not like i 'm not trying out there
people use them if they are able
it 's our country and we 've got to win it for them
results were not expected until monday
he 'll be here for us
the women were not arrested
the army has taken no action in the case
both countries have national elections in a year
several people also were injured
this is the first day
no i did n't see them
that is expected to take several months
i do n't think that 's even part of it right now she said
officials refused to comment until after the report was released
now he 's one of the best
korea team fighting
he is not like other players
their office has been closed
the man 's name was not released
peace is our right
it was like an own goal
this is a great group
there is nothing to support them
there was no immediate ruling by the court
but he had n't given up hope
the world is round
only four players have more
that decision could come wednesday
i do n't like violence
she 's going to hit it
u.s. officials said the meeting was set for sunday
but you are going to have to work at it
this situation is no different
four others were never found
they 've always got their own way
that 's the only way you are going to win this cup
and i have all the support i need to help me get through this
we 've made our case on what we believe
there really is n't such a thing
it 's a really good time
the report gave no details
it is too early to know
it 's a long season she said
i just like being here he said
in china the party is the state
she would have died
there was no immediate decision whether the race will be run monday
many come from other states
i have a lot of plans
we do n't know yet
i was going to show it to him
things were never the same again
it 's for my general
it was a game i thought i could win
there will be no end
that 's not the problem now
its name was not known
he has the details
police officials could not be reached for comment late saturday
that would change the world
she was arrested late thursday
some people can deal with it and some people ca n't
we did n't have to do that
you should not go into this to make money he said
that money could be lost now
and there were a few of those
today they have no government and no law
details were to be announced later
i want him to be killed she said
just come and play
we got them to play
both have declined to comment
that was all part of it
it 's not part of their job
but he can not do both
we want this to keep going
they want a chance to show they can make this right
no one wanted to make it
several people were taken to a hospital
we 're not like these men
they released the shares last month
and that is the best we can do
final results were not expected until today
we do n't have elections he said
but that will come out
the government has not said what charges they will face
the party has not been able to name a new leader
japan says he is n't japanese
he too declined comment
things are the way they are
and you should meet the people
no other workers were injured
both have denied the charges
without that part of it we would not be able to do the deal
without security there is nothing he said
court officials have refused to comment on the ruling
that 's the big news
that is a long time
i hope war will not come
we do n't know but it 's one game
but they can never know that
we 're going to do a good job
you just want to know
two soldiers were killed and one was injured
we just do n't think that 's the thing to do he said
parliament will never be the same again
that 's what i believe
it did n't have to work out this way
we are not here to put them out of a job
we do n't need no president
but it gave no other details
it 's going to be a lot of people
it 's a good place for me
there have been problems
i 'm going to give it a try
a company spokesman declined to comment
they likely would have hit it off
it could do this right now
that 's the way i like it
he must go she said
final results were expected friday
he found they did not
there was no immediate u.s. military comment
if it is going on it should n't be
he did n't want to do this
and she has n't won any of them
it will be his third visit to the united states this year
it was too late to move
that was very important
they 'll need to be at their best for their final four games
i do n't make them
it gave me a chance to keep working on my game
you have to attack
he also said he would appeal
he said he would run again
they have to release him immediately
the nation 's first law
there will never be peace
but it was n't just a party
i really do n't think about it at all he said
that 's what he said
i think that is the case
he did not use them
we just have so much support from all of them
five people were shot to death
they can still come
they have n't closed it out
i do n't need to use that
there 's nothing we could do
palestinian officials could not immediately be reached for comment
the most important thing is that people must vote he said
and it did n't take long
i think we have a chance to win it next year
they were going to work
they could see them
you do n't have to do this
it 's no big deal he said
and iraq is part of the security of the united states
they just could n't do that
this was a great win
and i wanted to put that out
it 's part of the game
three soldiers were injured
i wanted more she said
but we made it to the end
they are not working
but we 'll never know
all were released from the hospital
she wants to win the french open
local elections will be held later
this is not good information for her for this season
it is a very important part of my life he says
this is not a life
i would like to have more
it said that would include
so it was down to the coach
he did n't name any countries
there 's no army or police there
it took four years
i really ca n't believe it
but that was then and this is now
but it 's always been like that
the release is the release he said
now is the time to use it
he had played his last official match two years earlier
each case is different he said
this is going to be a war
i think he does a good job bush said
two people were injured in the fight
each member country has one vote
it 's not scheduled to be released until next year
after that i do n't know a lot about him
first results were expected tuesday
now he 's become a leader
i think it 's going to take some time
then we will go for victory
it 's not the first game we 've lost this season
no players were injured
officials refused comment
he did not know the people who died
both men died early sunday
we gave them a great show
we 'll get it going
i just do n't know he said
and that 's just life
i know i can win here
we do n't know what is going on
but he declined to release details of the agreement
he did n't know these people
that must not be allowed
he was released three days later
that 's not my job he said
price were going up wednesday
that would be a world record
no agreement has been reached
further charges are possible
we need more details
because iraq was very strong
it is not going to be closed
results were not expected before wednesday
i did n't want it to end
but i do n't know that yet
i do n't think about his past
but they need this
this is a war against all of us he said
he declined to comment further
now he might have the best one
but that may be a good thing
the u.s. state department also had no immediate information
the company made no comment
thursday 's decision said it was
do they have a case
the last match was not played
but there is a long way to go
he did not immediately comment today
police would not comment on the report
we do n't want that
i 'll get him back
this season did n't go the way it should have he said
if you ca n't win in china you ca n't win in the united states
she died five days later
but life is that way
the investigation report has not been made public
that 's what i like
we have n't had any problems
we know it 's the same game
it is scheduled to be released next year
she was allowed to vote
we had n't lost a game
the future is the future he said
i believe this is my place
it gave no details
friday was no different
the best time is now he said
two other men were also killed
that 's part of life
france should know
then you can start over
it did n't take him long
but it 's just one of those things
this is a city that 's on the move
hospital officials said they were asked by family not to give details about his condition
that 's part of my job he said
we do n't need her
there 's no need for it
on thursday he said he would not run
i will have to run after the world record
i was very close to a great round he said
then the american show began
this is not going away
both reports could not immediately be confirmed
they have a lot of good players
it was made public by the committee
i know that 's very important
the united states has the right to appeal the decision
the president 's office said it had no comment
we 'll get it back he said
i 'm not the one who made the comment
i need the money he said
they had work to do
she was released last week
it has lost money for the seven past years
he just has a good time
major did not give immediate details
i do n't think he would like that
she went no further
i do n't think there will be any major problems
he was not injured
party members however said she would not use it
international trade
most will never know it
now i want to know more
they were her only points of the game
seven people were killed
then we lost both games
they think it 's a lot of money
there was no immediate u.s. statement
i think it 's a very good use of public money he said
we are a military force
we 're here to win
the report gave no more information
no such decision has yet been made
it does n't work here
hospital officials said four people were killed
as long as i can help i 'm going to help he said
she told me she would see me again
the deal was expected to be announced tuesday
she was released after the ruling
russian officials denied those reports
and i will have that help
the foreign office declined to give details
no office said it was n't
what is there to say
he did n't give further details
should they keep it
i do n't want to have to hit that shot
he could then take his money and run
he is fighting the move
he has a good future
he will visit both countries tuesday
u.s. officials declined comment
police gave no further details
israel 's defense ministry declined to comment on the report
these people are working for me
the two women are not
it went on all season long
but he did n't do any work
it 's nothing he told reporters
i know i 'm a good part of the team
i did n't believe him
she is n't and she does n't
a final decision was expected next year
it could be announced as early as saturday
now they do n't have to give that up
i think people expected him to win
there 's no other way to put it
i just have to deal with it
the man said he could
i do not believe in violence he added
there are a lot of good players here
no such charges have been made
i would have expected more
the court agreed friday to take the case
they lost four of them
but it would be good news
they have a long way to go
u.s. officials could not be reached for comment saturday
and it 's my future
they declined to give any further details of the visit
friday is a different game and we 'll try to win that one
the state department confirmed their visit
five people have died since friday
it was like there was a change of life she said
they were seeking their first cup
but we 're not going to be a problem
i think we did what was best
there was no immediate israeli military comment
i said i 'm not going to do that
that 's just part of it
he died two years later
can we do it today
this is the last one
you ca n't take a day off
it 's a good thing
the people never give up
there was no immediate comment from the russian government
i 'll try to make the most of it
this can not go on
he did not give any details of what might be in it
the army said the palestinian had tried to attack soldiers
it had been such a long time
all group a games are being played in japan
just give us a chance
it is possible if things continue to go the way they have been going
i did n't say i was not going to run
but he wanted to stop it
you have to be there
he did not play in saturday 's match
we want to win it he said
this time she had five match points
today is no different
israel had no comment
but this will not be for long
it 's not like he won
he said no decision had been made on whether to appeal
but that 's only part of the problem
the man would not give his name
two others were arrested
the director said in a statement
it said details of his release were not known
i played my own game
but third was good
he now has his chance
i have to work on my game he said
another man was injured
this is match play
i thought he was going to come out of it
you can see it from the number of people who fell or went out
he left that job last month to run for president
american troops must be out of the country by that time
we have no other place
there were no problems he said
this investigation wo n't be open to the public
we 've got to go up this year
but that 's next month
it was not clear whether the state would appeal the decision
there is no way you can call that
it 's great she said
it 's just one of those things he does all the time
we 'll play to win
he played a great game
they agreed to try
the man does have a point
he did n't give up a hit after the second
it 's a great start for the team
some are back for the second or third time
four years ago he was the coach
that 's what you want
if i 'm not i 'm not
he died four days later
iraq has denied the charges
however the government denied the report
this is over he said
we have come a long way he said
i was even working out since the end of the season
going away i can do it
and i would n't want to do that
they were there to show face he said
but i do n't think it will be like the past
but i do n't know his name
i do n't think it 's any big deal
the final will be held sunday
the soldiers thought they were rebels
it will be their second meeting
they just know that they just want to vote
it had to be this way he said
you ca n't force me
i really do n't think this is a big deal
but they see it as a good thing
in two years elections will be held
a government spokesman could not be immediately reached for comment
this is not a close call
no further information was reported
talks were expected to continue monday
i would n't even have to make a move after that
there is n't a problem
the decision could come as early as tuesday
this year they are the same week
she declined to name who would be in the group
the players think they have it
he had no public comment friday
and i do n't want to say i took control
military officials have released few details of the case
i want to go back he said
the program is open to all
we have no record of them
if i lost that support that would be different he said
the vote is expected later this year
it was expected to return to france on tuesday
you might say that he said
that 's what we want
he said you 're right
they could have left the area
the team won both games
he also called for
but he declined to give more details
i do n't need money
i ca n't believe other players do n't do the same
clinton who has not been charged has denied it
there was n't a big problem she said
never said i was n't
we 've got to keep working on it
but the important thing is to win the cup
it 's a second chance
those were the days
it 's a market leader
he just did n't have it today
we did n't do that
he is also scheduled to visit south korea
the money is great
i just want to be called a director
that 's when the show began
but that was a week ago
we believe we are very close with other countries he said
there was no other information
i do n't believe he is
the government declined to comment
we do the same thing and it 's called
we said we wo n't do it
we have an economy
you already know what it is
we do not want to have a second vote
people do n't think it 's a problem
but i 'm going to make it
there are no police
can you believe you did it
the best is still to be
he declined to make a statement monday before the judge
but we will do our best
she really had n't
he said six others had been arrested earlier
i ca n't get into that
it was a good win to get
but it could not be confirmed
i just did n't want to be there he said
i would do the same thing again
it is not against israel he said
tuesday 's decision was expected
this is all i 've got
and he wants no part of that
there were no details of the agreement
but he may not get the chance
that will be the end of that
i wanted to be president
however things may change before next year
it did not say who would put up the money
two were reported to be injured
but right now the most important thing is the world cup
he wants to win and i want to win
and she might be right
the fire died out on its own
he also got his first hit of the season and scored his first run
you just think about it
we did n't want to see his face she said
he was able to continue
it is time we get even
what was the problem
we want to stop it he said
the united nations denied the charges
until the final round the fight was close
they just do n't work
the french defense ministry spokesman declined to comment
now we 've got a second life
the court said it would issue a ruling thursday
that 's not like me
but he says such reports are few
no one is going to take it away from me
but he went no further
i just hope he will be all right
i have known him for a long time
two u.s. officials declined to comment immediately
the world is united against him
i 'm not going to be there a month he said
and they know that
the opposition has never held power
she refused to give details of the talks
we now have to keep going
i 'm not saying we are the best team in the world he added
we still believe we 're a good team he said
i just try to play the same
i think it 's too early to judge he said
it was n't a day i wanted to have
people want to see that
the president was quoted as saying
and you ca n't win if you do n't play
other analysts agreed
others say it is political
i do n't want to judge my work she said
then again he did n't get much support
first results are expected monday
this is not an american issue
then i would not need this money
official results were expected tuesday
company officials told reporters that they would immediately appeal friday 's ruling
we ca n't stop the games for security he said
he might never be back
i 've lost my money
he has been head of the state government for two years
but we have a right to that information
we have to take it one game at a time
the results have been good
he 's always wanted it
and you want to change all that
things are great she said
we really do n't know she said
i never thought i would see it again
i want to change that
they 're in a foreign country
and she should know
who would n't want to have that
the force did not release his name
police confirmed one death
it had nothing to report
he does the same to me
if we must fight we will
you get to know them
they become part of the game
it 's not over he said
it does change some things he said
that 's just the way it has to be
they 're just things
i got no way to get there
the union wanted new york
u.s. officials have released little information
the army spokesman did not comment
it will be a long process
court officials also could not be immediately reached
the final is scheduled for thursday
they are going to help all of us he said
we 've come to win
it should be as close as it was four years ago he said
for her that much was clear
but they have not been able to stop them
but police would not give any other details
our country is like a foreign country he said
this is a very good statement he said in a statement
now is the best time
the first official results are expected wednesday
military officials declined to comment
the foreign ministry confirmed the statement
they are the future leaders of the country
he does n't want to get hit
i try to give it the best shot i can
he had one problem
it 's the same thing
i do n't want to see you
they declined to release further details
she was released 10 days later
the official declined further comment
i think this is the right way to go he said
then he fell down and was n't seen again
local police said they had no comment
it 's a local decision
there is not he said
but they need all the support they can get
the others are still under investigation
he 's got it going
the company released no financial details
it was a great race he said
now she has won five
other than that it was a great shot
bank officials also did not name them
the stock began to trade again wednesday
this is what i believe
two rebels were also killed
even he could n't believe it
i 'll support him to the end
the government would be the only help
they told us that there were going to be talks she said
her visit began sunday
the state department could not immediately be reached for comment
police did not name the men
i can not force them he said
he said he had no further comment
i believe her he says
you 've got to make it work
officials declined comment after the meeting
i do n't want to take time off now
people came to my house to see it
they had been shot to death
two different things
it 's not going to work
official results were expected to be made public in a week
others were shot to death
he had no information on others being injured
the vote is expected to be held friday
she declined to give other details
israeli military officials had no immediate comment
after that she 's on her own
they are the best of the best
now we are the best
they did not think about the economy
that too was rejected
it 's like my home
the two men are scheduled to meet next week
it was n't a given
i hope you do this
he had no further details
he 's got all the money in the world
the second group also was arrested
it 's going to take months
then there are the people
the united nations has not confirmed the fighting there
foreign ministry officials had no immediate comment
people should n't think this is the end of the process
he said he refused
he 's not going away
but i can top that
the united states said it does n't know who they are
would i be able to get people to see them
it did not name the men
the final will be played sunday
that was who we were
it 's never too late
she would not give details
official results were expected late tuesday
she was released without being charged
and he might be the country 's next president
the talks are scheduled to last through friday
they were just different
the other is russia
she wants to make them think
they call it an election
there were no immediate details
the group is expected to support both plans
this is not my war he said
that would work like this
then he lost control
there 's no way to make any money
it 's time for results
more talks will take place later this month
the season 's over for me
that is if there is a season
do n't try to get my name
that 's not the case this year
they do n't have other money
they never gave up the lead
we believe this is a job for military forces
he 's not allowed to do that
i did n't back off
that 's the coach 's decision
the defense department declined to give details
the statement could not immediately be confirmed
it was the only thing we had
no one asked me she said
i think it 's going to be a good fight
election results were expected friday
we will not try again
the ministry gave no further details about the case
no man is no problem
palestinian officials could not immediately be reached for comment on the report
most have been rejected by china
they have killed so many people
we ca n't force companies to do things said the spokesman
but we ca n't think about it until we win that final game
this was his second of the season
that 's not a problem today
they have four children
they did n't have a clear shot
it was the right thing to do the president said
there is a need for immediate action
but he did not have time to get away
i had nothing to do with that he said
i could not control my shot
i 'll fight for you
rebels could not be reached to comment on the fighting
then they refused to back down
the statement asked
law also said the meeting was very good
we are saying that we do n't have such weapons he said
this is a major change
they did not comment
this is really important to me
will it be used against me
to him there was no decision to make
i did n't even know what was going on he said
four people were killed
two other people have been reported killed
it 's like a big family
they never give up
i had no close call at all he said
it 's a big deal he said
there were no reports of major fighting
we know we ca n't keep it he said
they ca n't get out
it 's no big deal now
his soldiers came through
i thought it was taken away from me
police have refused all comment on the investigation
the russian defense ministry had no immediate comment
one was released earlier last week
i do n't think i 'll need them
he is a man of power
the season is too long
time control reached
it 's not going to be a problem
she declined to give her name
without them there 's no game
now we have to think of some other way
they could n't come up with any
if he did n't change he would have lost
still plans are being made just in case
they planned a meeting late friday on the issue
they will be back he said
he would not give other details
that is different and i can be different
it was a great shot for her
but this is close as it can come
you do n't need action
but it will not be at any price
the first has to be the best
we had to use what we had
police could n't immediately be reached for comment
more official results were expected monday
and you might like it
but this will have to change
the right attacks the left
results are not expected until thursday
he said he did n't plan to fire him
china had refused to take part
there must be two states he said
there may be little point
no other nation came close
there were n't a lot of people she said
still it lost money
this will be an open process he said
israeli officials said they had no information on the report
she died the next day
they 'll get him he said
next year we 're going to go to china
but now it 's great
i could play with it today
we had a good race
again no play was possible
the committee is expected to have no more than six members
but he could n't take you out
their condition was not made known
i always have been
you just want to be the best
two others died in similar violence monday
if you think you 've seen this game before you have
this time has been no different
both are expected to start
she asked for the same
this is really a great team
the game was played here
in each case the other nation was second
but we found a way to make it work
it always has been he said
a final ruling is expected next year
it 's been a long process he said
the two were not expected to fight the charges on monday
it 's not over yet
people will win against you
the american could not be reached for comment
but i was n't about to do that now
we 're like a big family
i just ca n't see him
the high court has refused
i have n't expected any of this
i want the city to come back she said
north korea was the third
but that may help us next week
the results had been expected
it did not name his political party
it 's now possible
it is a problem in the system
i do n't think there is one
no one has been charged
we have to have other people help us
he said they would be held later
u.s. officials said they want a vote early next week
government officials declined to give more details of the program
i did n't know he was that good
people do n't see that
the military did not comment on the report
that 's election day
it is an agency of the defense department
the talks are to continue on sunday
he did n't give details of his talks
we 're not going to give in or give up
they did their time
i would not be able to comment on that he said
it has nothing to do with iraq she said
now it has the chance for its first big victory
we have no information on that
and if they are we will
he wo n't be there
the reports have not been confirmed
he might vote for me
he also has made no public statement
it 's not like we did n't know about him
we will face the decision
he 's a strong leader
you wo n't get away with it
it is still possible to stop it
he would not say who reported it
they are seeking help from the public
other officials could not be reached for comment
they do n't like them he said
it is a problem of our economy
we should give him a chance
government officials said an investigation was under way
but we won the game
so she had to make a move early
all that is going to change
i do n't think there will be a problem he said
and we have seven children now
a news conference was scheduled later wednesday
they will meet again
he was later released without being charged
he called the city
the report was announced in a press statement friday
it 's always a good thing
he will also keep his job as the party 's leader in parliament
she was left with nothing for her and her five children
japan also is a past member
i do n't want to get into this
those are the things that are important
now it 's not the case
still there has been opposition
that 's not our game
but he said he would never return to iraq
but we released him without his head
the people were right he said
it 's the first major he said
they 're great players
i do n't have the money
the government declined to comment on those reports
talks were still going on
there will always be another race
i wo n't be run off he says
it 's not going to hit home
the ministry gave no other details about the case
he 's also the new police chief
it did n't stop there
he is still being held and has not yet been charged
this is a war against the palestinian economy he said
authorities however do n't believe him
i just did n't want to do it
he would n't comment further
but i still have to win the race
that would really be the best
it never got to that point
it was a big decision for me but i have made the right one
i do n't think there is any good need for it
the report could not be immediately confirmed by palestinian officials
i do n't think that 's the case
but we want it and we like it
man could not be immediately reached for comment
city police also declined to comment
his name was not announced
this could be a thing of the past
the trial is expected to last through next year
we made family games
the company comment came friday
he has the power to close he said
now he 's trying to be too big
i have some security
the six were arrested last month
those men are being held but have not been charged
final results were expected tuesday
she denied the charges
then i went and called for help
israeli military authorities had no comment
he had not seen the report
i wanted to attack
i did n't take them
i did all the right things
for us this is not the end
so we 're going to play that through
but we still have n't reached that point
there were two of them
this was not the case he said
they have a good team
that 's not the way i wanted to start the season
it 's the company you keep
there is also the hope for the future
he said no decision has been made on whether to appeal
those reports could not be confirmed
in this case you 're not
we have n't won it yet
they should help us
but they could do nothing for us
further details were not released
i really do n't want to comment on it
there 's no other way to do it
the results were n't great
british officials declined to comment on the reports
but i still have n't lost a match
that was five years ago
we think they do n't make a lot of money but they do
he has still not been found
you are going to make the shot
this is his first year
i just try to take it one day at a time
the last match was never played
this is not what i want
officials also reported 10 people were injured
but he gave no other details
but they were n't the only problem
it did not give the financial details of the deal
the plan was rejected
he was told he had been rejected
but it 's a good one
authorities denied the charges
it 's not like he 's not going to be back
but you 've got to play the game
that was important
it 's the only way he 's made money in the past
they are part of the same system he said
it will be great to get back
this has been denied by the british government
the company refused comment
we do n't have nuclear weapons he added
but he does n't see the former president
the american refused
they said we do not need him
and she wo n't win more
the foreign ministry said it had no comment on the u.s. report
many gave up and went home
but if i do n't it 's not going to be the end of the world
we really do n't know
there was no immediate comment from the french government
and it 's not over yet
i 'm trying to get the details he said
the committee refused
parliament was never allowed to meet
there 's no issue there he said
it still has not been
he asked the court then
the visit did n't help his case
i never got a report on it
the important thing is to try
i do n't think about the future
she would n't give her name
i had to give that up
i do n't run for the world she said
i 'll always believe that
we just have to make it work
i was always allowed to do my own thing she says
on saturday they did n't
both men were arrested last thursday
they had no comment
that is not the case today the french foreign ministry said in a statement
u.s. authorities say
this is an international war he said
i have n't said that
i lost six people of my family
we have a free country
the decision was close
he never told his name
i ca n't believe i scored a goal
the other man was arrested
the committee 's decision is expected to be made public wednesday
the man has not been charged
we just want to win
it 's great for the league
the report is clear
the last round of talks took place last week
details have not been released
the trial will continue next week
they 'll play another game thursday
we do not think it is possible
he called for new elections
i did not know them
the point was n't over
i 'm the head of the family he said
it 's really not an area that 's likely to be good for them
the government did not immediately comment on the report
we must see he said
we want to take her home
police released no further information
this one was n't going to get away
it should go to a vote
he could and he did
both had been shot
you got the most important one
all three were hit
i was never charged
there was no comment from iraq on the report
i thought it was n't
i do n't like war he said
it will help our economy and it is the right thing to do
i think it would be great
but she did n't win another game
government officials could not be reached for comment thursday
i 've got to think that
it 's a big week rose said
it never hit me until the end of the year he said
a second was arrested
defense officials said they could not immediately comment on the report
i do n't think there was
then again she might
results were expected monday
but the government said all were killed
this is the last time i 'm going to do this
his trial is scheduled to continue next week
and this is the day
it was a great year
we do n't have a police force
in this case they are
it 's going to be a big company
the government has taken the children
it does not have its own police force
the visit had not been announced
the official had no further details
it will not likely be the last
he would not say what charges they might face
it was his second home run of the season
he said some had been released but gave no further information
he scored in that final
they ca n't take this from any of us
people wo n't get killed
it will take time he said
it did not have details
the united states and european union already have a similar agreement
he was just too strong for me he said
it will be like now
this decision is the right thing
final results are expected to be announced thursday
the report was not confirmed by the u.n.
i would like to have won it
it 's a great move
that 's all you can hope for
i did n't want to change countries again
the u.s. government did n't do it until friday
i still have another race to go
but that does not have to be
six others died later
we have to start today
talks are expected to continue until sunday
results could take days
the team must have some he said
much of the new fighting came last week
he did n't give up on the year
it 's the things that give the defense problems
i just want to keep it going
and that is not such a long way off
now we get a chance
that 's all i need
the reports gave no further details
a team spokesman did not immediately return a call seeking comment
they thought they had killed him
i must say that this is the most important point
there is no more he said
they did not do that
i 'm going to support our leaders he said
i had to get back on it
military officials could not be reached for comment
results are not expected before monday
it just did n't go my way today
if i play good the money is always going to be there
they were to be tried in a federal court in washington
i had nothing to do with it
it 's a very important part of our game
there is a long way to go he said
it 's not like he 's going to play another one of these
we do n't need it he said
we could be in last place
official details were to be released later friday in washington
that is not a problem for me
the problem is the name
talks are scheduled to continue saturday
you have to make that decision
he 's a great leader
it ca n't be allowed
but i will take first
the fire was put out late thursday
he 's going to continue fighting for that
if they do n't want to believe it that 's their problem
we have to keep working on our game he said
iraq has always denied this
that is all i can do
the work has always come first
he declined to give details of the case
the results are expected in the next few months
she gave no further details of the plans
we ca n't believe it
i just wo n't be a part of it
this is a good time of the year
i have to believe in that
the election is not scheduled before early next year
the court 's action released monday was taken without comment
the authorities say she will be arrested
we ca n't help him here
he scored the first two
it was the right decision
those results were also released friday
no details have been released
i want to get on with my life now she said
but without elections there is no chance at all
and we have n't seen the end of korea 's financial problems
other companies have their own plans
this week it 's france
i would hope they would work with us
people did want us
i just do n't know who 's going to make the money in it he said
he did not name any companies
it has never been found
it 's got nothing to do with me
they do n't want to see their government do that
no immediate agreement was reported
it is now a lost season
party officials have denied those charges
he had no other immediate details
police also declined to comment
the hospital said he was released but declined further comment
she may never come
i have nothing to do with the attacks
we 're not finished he said
it was her second victory in a month
it 's going to continue he said
i can not believe it he said
he wanted to go home
i really do n't know what the problem is
the country will not be left without a leader he said in the statement
do i need to say more
i want to be there she added
results may not be known until tuesday
we have agreed on this
it will make its own appeal friday
the president 's got a good plan
i 'm never going to give in
israeli officials would not comment
you could n't say what it was
but are they trying to help him
they should be injured
he also made these other points
there is nothing to the thing
final results were expected early monday
we just do n't do it
she did not issue a statement
i ca n't help out he said
results were expected late monday
i do n't think they will try to attack
four others were injured
they keep her company
our administration will not force peace bush said
i have a new life right now
he lost the election
they just do n't know it
this is the first time i 've made a report like this she said
that wo n't be the case this time
she did n't give details of the attacks
one israeli was injured
companies are fighting back
that 's what we need
the talks were closed to the press
i did n't say he was a problem long said
he did n't have to do this
his decision was expected friday
but he refused to say much
the system has to be right
i just wanted to come back
police and military officials had no immediate comment
i do n't have a game he said
[truncated: 353,489 more chars]
