# Supplementary material
Source: ML conference proceedings conference paper supplement (https://proceedings.mlr.press/v37/steinhardta15.html)
Supplement: Supplementary file 2 [file steinhardta15-supp.zip › packaged-code/src/Data.java]

import java.util.*;
public class Data {
  List plain, cipher;
  public Data(){
    plain = new ArrayList();
    cipher = new ArrayList();
  }
  void addPlain(int[] x){
    plain.add(x);
  }
  void addCipher(int[] x){
    cipher.add(x);
  }
}
