# Supplementary material
Source: ML conference proceedings conference paper supplement (https://proceedings.mlr.press/v37/steinhardta15.html)
Supplement: Supplementary file 2 [file steinhardta15-supp.zip › packaged-code/src/Params.java]

import java.util.*;
public interface Params {
  void add(Prefix p, int i, double wt);
  double get(Prefix p, int i);
}
