# Supplementary material
Source: ML conference proceedings conference paper supplement (https://proceedings.mlr.press/v37/steinhardta15.html)
Supplement: Supplementary file 2 [file steinhardta15-supp.zip › packaged-code/src/run_default.sh]

#!/bin/bash
./run.py --compile --name default
echo "See state/execs/default/ for results"
./run.py --run --name default --dataset ../data/char-level --iterations 20 --inference 2 --ngram 3 --kn --B 10
